# Supplementary material for: Circular RNA repertoires are associated with evolutionarily young transposable elements
Source: eLife. 2021 Sep 20;10:e67991. doi: 10.7554/eLife.67991 (PMC8516420; doi:10.7554/eLife.67991)
Supplement: Supplementary file 12. — A gtf-file with all circRNA transcripts including the transcript and exon coordinates. [file elife-67991-supp12.gtf]

1	ncSplice	gene	10064121	10107485	.	-	.	gene_id "ENSMODG00000011252"; gene_name "NA"; gene_source "ncSplice"; gene_biotype "protein_coding";
1	ncSplice	transcript	10064121	10107485	.	-	.	gene_id "ENSMODG00000011252"; transcript_id "mdCircRNA-1"; gene_name "NA"; gene_biotype "protein_coding"; transcript_biotype "circRNA"; oId "lv:circNA-1-001"; tissue "lv";
1	ncSplice	exon	10064121	10078022	.	-	.	gene_id "ENSMODG00000011252"; transcript_id "mdCircRNA-1"; exon_number "1" gene_name "NA"; gene_biotype "protein_coding"; oId "lv:circNA-1-001"; tissue "lv";
1	ncSplice	exon	10087084	10107485	.	-	.	gene_id "ENSMODG00000011252"; transcript_id "mdCircRNA-1"; exon_number "2" gene_name "NA"; gene_biotype "protein_coding"; oId "lv:circNA-1-001"; tissue "lv";
1	ncSplice	gene	10066762	10118893	.	-	.	gene_id "ENSMODG00000011252"; gene_name "NA"; gene_source "ncSplice"; gene_biotype "protein_coding";
1	ncSplice	transcript	10066762	10118893	.	-	.	gene_id "ENSMODG00000011252"; transcript_id "mdCircRNA-2"; gene_name "NA"; gene_biotype "protein_coding"; transcript_biotype "circRNA"; oId "lv:circNA-3-001"; tissue "lv";
1	ncSplice	exon	10066762	10078022	.	-	.	gene_id "ENSMODG00000011252"; transcript_id "mdCircRNA-2"; exon_number "1" gene_name "NA"; gene_biotype "protein_coding"; oId "lv:circNA-3-001"; tissue "lv";
1	ncSplice	exon	10087084	10118893	.	-	.	gene_id "ENSMODG00000011252"; transcript_id "mdCircRNA-2"; exon_number "2" gene_name "NA"; gene_biotype "protein_coding"; oId "lv:circNA-3-001"; tissue "lv";
1	ncSplice	gene	107609985	107625978	.	+	.	gene_id "ENSMODG00000010881"; gene_name "NA"; gene_source "ncSplice"; gene_biotype "protein_coding";
1	ncSplice	transcript	107609985	107625978	.	+	.	gene_id "ENSMODG00000010881"; transcript_id "mdCircRNA-3"; gene_name "NA"; gene_biotype "protein_coding"; transcript_biotype "circRNA"; oId "lv:circNA-6-001"; tissue "lv";
1	ncSplice	exon	107609985	107610141	.	+	.	gene_id "ENSMODG00000010881"; transcript_id "mdCircRNA-3"; exon_number "1" gene_name "NA"; gene_biotype "protein_coding"; oId "lv:circNA-6-001"; tissue "lv";
1	ncSplice	exon	107618499	107618561	.	+	.	gene_id "ENSMODG00000010881"; transcript_id "mdCircRNA-3"; exon_number "2" gene_name "NA"; gene_biotype "protein_coding"; oId "lv:circNA-6-001"; tissue "lv";
1	ncSplice	exon	107620878	107620954	.	+	.	gene_id "ENSMODG00000010881"; transcript_id "mdCircRNA-3"; exon_number "3" gene_name "NA"; gene_biotype "protein_coding"; oId "lv:circNA-6-001"; tissue "lv";
1	ncSplice	exon	107622442	107622573	.	+	.	gene_id "ENSMODG00000010881"; transcript_id "mdCircRNA-3"; exon_number "4" gene_name "NA"; gene_biotype "protein_coding"; oId "lv:circNA-6-001"; tissue "lv";
1	ncSplice	exon	107625862	107625978	.	+	.	gene_id "ENSMODG00000010881"; transcript_id "mdCircRNA-3"; exon_number "5" gene_name "NA"; gene_biotype "protein_coding"; oId "lv:circNA-6-001"; tissue "lv";
1	ncSplice	gene	108969184	108971426	.	-	.	gene_id "ENSMODG00000011165"; gene_name "CNNM2"; gene_source "ncSplice"; gene_biotype "protein_coding";
1	ncSplice	transcript	108969184	108971426	.	-	.	gene_id "ENSMODG00000011165"; transcript_id "mdCircRNA-4"; gene_name "CNNM2"; gene_biotype "protein_coding"; transcript_biotype "circRNA"; oId "lv:circCNNM2-8-001"; tissue "lv";
1	ncSplice	exon	108969184	108969353	.	-	.	gene_id "ENSMODG00000011165"; transcript_id "mdCircRNA-4"; exon_number "1" gene_name "CNNM2"; gene_biotype "protein_coding"; oId "lv:circCNNM2-8-001"; tissue "lv";
1	ncSplice	exon	108971065	108971129	.	-	.	gene_id "ENSMODG00000011165"; transcript_id "mdCircRNA-4"; exon_number "2" gene_name "CNNM2"; gene_biotype "protein_coding"; oId "lv:circCNNM2-8-001"; tissue "lv";
1	ncSplice	exon	108971289	108971426	.	-	.	gene_id "ENSMODG00000011165"; transcript_id "mdCircRNA-4"; exon_number "3" gene_name "CNNM2"; gene_biotype "protein_coding"; oId "lv:circCNNM2-8-001"; tissue "lv";
1	ncSplice	gene	173895253	173896503	.	+	.	gene_id "1:173895252:173896503:1"; gene_name "1:173895252:173896503:1"; gene_source "ncSplice"; gene_biotype "novel";
1	ncSplice	transcript	173895253	173896503	.	+	.	gene_id "1:173895252:173896503:1"; transcript_id "mdCircRNA-5"; gene_name "1:173895252:173896503:1"; gene_biotype "novel"; transcript_biotype "circRNA"; oId "lv:circ1:173895252:173896503:1-59-001"; tissue "lv";
1	ncSplice	exon	173895253	173895367	.	+	.	gene_id "1:173895252:173896503:1"; transcript_id "mdCircRNA-5"; exon_number "1" gene_name "1:173895252:173896503:1"; gene_biotype "novel"; oId "lv:circ1:173895252:173896503:1-59-001"; tissue "lv";
1	ncSplice	exon	173896288	173896503	.	+	.	gene_id "1:173895252:173896503:1"; transcript_id "mdCircRNA-5"; exon_number "2" gene_name "1:173895252:173896503:1"; gene_biotype "novel"; oId "lv:circ1:173895252:173896503:1-59-001"; tissue "lv";
1	ncSplice	gene	196381372	196382485	.	+	.	gene_id "ENSMODG00000000619"; gene_name "EIF2AK4"; gene_source "ncSplice"; gene_biotype "protein_coding";
1	ncSplice	transcript	196381372	196382485	.	+	.	gene_id "ENSMODG00000000619"; transcript_id "mdCircRNA-6"; gene_name "EIF2AK4"; gene_biotype "protein_coding"; transcript_biotype "circRNA"; oId "lv:circEIF2AK4-79-001|ce:circEIF2AK4-106-001|ts:circEIF2AK4-272-001"; tissue "lv|ce|ts";
1	ncSplice	exon	196381372	196381536	.	+	.	gene_id "ENSMODG00000000619"; transcript_id "mdCircRNA-6"; exon_number "1" gene_name "EIF2AK4"; gene_biotype "protein_coding"; oId "lv:circEIF2AK4-79-001|ce:circEIF2AK4-106-001|ts:circEIF2AK4-272-001"; tissue "lv|ce|ts";
1	ncSplice	exon	196382130	196382264	.	+	.	gene_id "ENSMODG00000000619"; transcript_id "mdCircRNA-6"; exon_number "2" gene_name "EIF2AK4"; gene_biotype "protein_coding"; oId "lv:circEIF2AK4-79-001|ce:circEIF2AK4-106-001|ts:circEIF2AK4-272-001"; tissue "lv|ce|ts";
1	ncSplice	exon	196382378	196382485	.	+	.	gene_id "ENSMODG00000000619"; transcript_id "mdCircRNA-6"; exon_number "3" gene_name "EIF2AK4"; gene_biotype "protein_coding"; oId "lv:circEIF2AK4-79-001|ce:circEIF2AK4-106-001|ts:circEIF2AK4-272-001"; tissue "lv|ce|ts";
1	ncSplice	gene	222158899	222170636	.	-	.	gene_id "ENSMODG00000002411"; gene_name "SERPINA6"; gene_source "ncSplice"; gene_biotype "protein_coding";
1	ncSplice	transcript	222158899	222170636	.	-	.	gene_id "ENSMODG00000002411"; transcript_id "mdCircRNA-7"; gene_name "SERPINA6"; gene_biotype "protein_coding"; transcript_biotype "circRNA"; oId "lv:circSERPINA6-102-002"; tissue "lv";
1	ncSplice	exon	222158899	222159046	.	-	.	gene_id "ENSMODG00000002411"; transcript_id "mdCircRNA-7"; exon_number "1" gene_name "SERPINA6"; gene_biotype "protein_coding"; oId "lv:circSERPINA6-102-002"; tissue "lv";
1	ncSplice	exon	222164298	222164568	.	-	.	gene_id "ENSMODG00000002411"; transcript_id "mdCircRNA-7"; exon_number "2" gene_name "SERPINA6"; gene_biotype "protein_coding"; oId "lv:circSERPINA6-102-002"; tissue "lv";
1	ncSplice	exon	222169990	222170636	.	-	.	gene_id "ENSMODG00000002411"; transcript_id "mdCircRNA-7"; exon_number "3" gene_name "SERPINA6"; gene_biotype "protein_coding"; oId "lv:circSERPINA6-102-002"; tissue "lv";
1	ncSplice	gene	256045556	256049572	.	-	.	gene_id "ENSMODG00000007529"; gene_name "ATG14"; gene_source "ncSplice"; gene_biotype "protein_coding";
1	ncSplice	transcript	256045556	256049572	.	-	.	gene_id "ENSMODG00000007529"; transcript_id "mdCircRNA-8"; gene_name "ATG14"; gene_biotype "protein_coding"; transcript_biotype "circRNA"; oId "lv:circATG14-130-001|ce:circATG14-210-001|ts:circATG14-535-001"; tissue "lv|ce|ts";
1	ncSplice	exon	256045556	256045637	.	-	.	gene_id "ENSMODG00000007529"; transcript_id "mdCircRNA-8"; exon_number "1" gene_name "ATG14"; gene_biotype "protein_coding"; oId "lv:circATG14-130-001|ce:circATG14-210-001|ts:circATG14-535-001"; tissue "lv|ce|ts";
1	ncSplice	exon	256046542	256046587	.	-	.	gene_id "ENSMODG00000007529"; transcript_id "mdCircRNA-8"; exon_number "2" gene_name "ATG14"; gene_biotype "protein_coding"; oId "lv:circATG14-130-001|ce:circATG14-210-001|ts:circATG14-535-001"; tissue "lv|ce|ts";
1	ncSplice	exon	256049510	256049572	.	-	.	gene_id "ENSMODG00000007529"; transcript_id "mdCircRNA-8"; exon_number "3" gene_name "ATG14"; gene_biotype "protein_coding"; oId "lv:circATG14-130-001|ce:circATG14-210-001|ts:circATG14-535-001"; tissue "lv|ce|ts";
1	ncSplice	gene	280672588	280683436	.	-	.	gene_id "ENSMODG00000013207"; gene_name "FRMD6"; gene_source "ncSplice"; gene_biotype "protein_coding";
1	ncSplice	transcript	280672588	280683436	.	-	.	gene_id "ENSMODG00000013207"; transcript_id "mdCircRNA-9"; gene_name "FRMD6"; gene_biotype "protein_coding"; transcript_biotype "circRNA"; oId "lv:circFRMD6-156-001"; tissue "lv";
1	ncSplice	exon	280672588	280672762	.	-	.	gene_id "ENSMODG00000013207"; transcript_id "mdCircRNA-9"; exon_number "1" gene_name "FRMD6"; gene_biotype "protein_coding"; oId "lv:circFRMD6-156-001"; tissue "lv";
1	ncSplice	exon	280675197	280675265	.	-	.	gene_id "ENSMODG00000013207"; transcript_id "mdCircRNA-9"; exon_number "2" gene_name "FRMD6"; gene_biotype "protein_coding"; oId "lv:circFRMD6-156-001"; tissue "lv";
1	ncSplice	exon	280678466	280678531	.	-	.	gene_id "ENSMODG00000013207"; transcript_id "mdCircRNA-9"; exon_number "3" gene_name "FRMD6"; gene_biotype "protein_coding"; oId "lv:circFRMD6-156-001"; tissue "lv";
1	ncSplice	exon	280682677	280682832	.	-	.	gene_id "ENSMODG00000013207"; transcript_id "mdCircRNA-9"; exon_number "4" gene_name "FRMD6"; gene_biotype "protein_coding"; oId "lv:circFRMD6-156-001"; tissue "lv";
1	ncSplice	exon	280683250	280683436	.	-	.	gene_id "ENSMODG00000013207"; transcript_id "mdCircRNA-9"; exon_number "5" gene_name "FRMD6"; gene_biotype "protein_coding"; oId "lv:circFRMD6-156-001"; tissue "lv";
1	ncSplice	gene	280712019	280726277	.	-	.	gene_id "ENSMODG00000013207"; gene_name "FRMD6"; gene_source "ncSplice"; gene_biotype "protein_coding";
1	ncSplice	transcript	280712019	280726277	.	-	.	gene_id "ENSMODG00000013207"; transcript_id "mdCircRNA-10"; gene_name "FRMD6"; gene_biotype "protein_coding"; transcript_biotype "circRNA"; oId "lv:circFRMD6-157-001|ce:circFRMD6-252-001|ts:circFRMD6-604-001"; tissue "lv|ce|ts";
1	ncSplice	exon	280712019	280712095	.	-	.	gene_id "ENSMODG00000013207"; transcript_id "mdCircRNA-10"; exon_number "1" gene_name "FRMD6"; gene_biotype "protein_coding"; oId "lv:circFRMD6-157-001|ce:circFRMD6-252-001|ts:circFRMD6-604-001"; tissue "lv|ce|ts";
1	ncSplice	exon	280713166	280713245	.	-	.	gene_id "ENSMODG00000013207"; transcript_id "mdCircRNA-10"; exon_number "2" gene_name "FRMD6"; gene_biotype "protein_coding"; oId "lv:circFRMD6-157-001|ce:circFRMD6-252-001|ts:circFRMD6-604-001"; tissue "lv|ce|ts";
1	ncSplice	exon	280726187	280726277	.	-	.	gene_id "ENSMODG00000013207"; transcript_id "mdCircRNA-10"; exon_number "3" gene_name "FRMD6"; gene_biotype "protein_coding"; oId "lv:circFRMD6-157-001|ce:circFRMD6-252-001|ts:circFRMD6-604-001"; tissue "lv|ce|ts";
1	ncSplice	gene	281549609	281562866	.	+	.	gene_id "ENSMODG00000013150"; gene_name "PYGL"; gene_source "ncSplice"; gene_biotype "protein_coding";
1	ncSplice	transcript	281549609	281562866	.	+	.	gene_id "ENSMODG00000013150"; transcript_id "mdCircRNA-11"; gene_name "PYGL"; gene_biotype "protein_coding"; transcript_biotype "circRNA"; oId "lv:circPYGL-159-002"; tissue "lv";
1	ncSplice	exon	281549609	281549740	.	+	.	gene_id "ENSMODG00000013150"; transcript_id "mdCircRNA-11"; exon_number "1" gene_name "PYGL"; gene_biotype "protein_coding"; oId "lv:circPYGL-159-002"; tissue "lv";
1	ncSplice	exon	281562264	281562375	.	+	.	gene_id "ENSMODG00000013150"; transcript_id "mdCircRNA-11"; exon_number "2" gene_name "PYGL"; gene_biotype "protein_coding"; oId "lv:circPYGL-159-002"; tissue "lv";
1	ncSplice	exon	281562784	281562866	.	+	.	gene_id "ENSMODG00000013150"; transcript_id "mdCircRNA-11"; exon_number "3" gene_name "PYGL"; gene_biotype "protein_coding"; oId "lv:circPYGL-159-002"; tissue "lv";
1	ncSplice	gene	309180879	309181629	.	-	.	gene_id "ENSMODG00000013660"; gene_name "INF2"; gene_source "ncSplice"; gene_biotype "protein_coding";
1	ncSplice	transcript	309180879	309181629	.	-	.	gene_id "ENSMODG00000013660"; transcript_id "mdCircRNA-12"; gene_name "INF2"; gene_biotype "protein_coding"; transcript_biotype "circRNA"; oId "lv:circINF2-186-001|ce:circINF2-305-001|ts:circINF2-720-001"; tissue "lv|ce|ts";
1	ncSplice	exon	309180879	309181040	.	-	.	gene_id "ENSMODG00000013660"; transcript_id "mdCircRNA-12"; exon_number "1" gene_name "INF2"; gene_biotype "protein_coding"; oId "lv:circINF2-186-001|ce:circINF2-305-001|ts:circINF2-720-001"; tissue "lv|ce|ts";
1	ncSplice	exon	309181527	309181629	.	-	.	gene_id "ENSMODG00000013660"; transcript_id "mdCircRNA-12"; exon_number "2" gene_name "INF2"; gene_biotype "protein_coding"; oId "lv:circINF2-186-001|ce:circINF2-305-001|ts:circINF2-720-001"; tissue "lv|ce|ts";
1	ncSplice	gene	312623412	312679445	.	-	.	gene_id "ENSMODG00000013489"; gene_name "MARK3"; gene_source "ncSplice"; gene_biotype "protein_coding";
1	ncSplice	transcript	312623412	312679445	.	-	.	gene_id "ENSMODG00000013489"; transcript_id "mdCircRNA-13"; gene_name "MARK3"; gene_biotype "protein_coding"; transcript_biotype "circRNA"; oId "lv:circMARK3-191-002|ce:circMARK3-312-002|ts:circMARK3-739-002"; tissue "lv|ce|ts";
1	ncSplice	exon	312623412	312623482	.	-	.	gene_id "ENSMODG00000013489"; transcript_id "mdCircRNA-13"; exon_number "1" gene_name "MARK3"; gene_biotype "protein_coding"; oId "lv:circMARK3-191-002|ce:circMARK3-312-002|ts:circMARK3-739-002"; tissue "lv|ce|ts";
1	ncSplice	exon	312635256	312635321	.	-	.	gene_id "ENSMODG00000013489"; transcript_id "mdCircRNA-13"; exon_number "2" gene_name "MARK3"; gene_biotype "protein_coding"; oId "lv:circMARK3-191-002|ce:circMARK3-312-002|ts:circMARK3-739-002"; tissue "lv|ce|ts";
1	ncSplice	exon	312646774	312646822	.	-	.	gene_id "ENSMODG00000013489"; transcript_id "mdCircRNA-13"; exon_number "3" gene_name "MARK3"; gene_biotype "protein_coding"; oId "lv:circMARK3-191-002|ce:circMARK3-312-002|ts:circMARK3-739-002"; tissue "lv|ce|ts";
1	ncSplice	exon	312659631	312659684	.	-	.	gene_id "ENSMODG00000013489"; transcript_id "mdCircRNA-13"; exon_number "4" gene_name "MARK3"; gene_biotype "protein_coding"; oId "lv:circMARK3-191-002|ce:circMARK3-312-002|ts:circMARK3-739-002"; tissue "lv|ce|ts";
1	ncSplice	exon	312679254	312679445	.	-	.	gene_id "ENSMODG00000013489"; transcript_id "mdCircRNA-13"; exon_number "5" gene_name "MARK3"; gene_biotype "protein_coding"; oId "lv:circMARK3-191-002|ce:circMARK3-312-002|ts:circMARK3-739-002"; tissue "lv|ce|ts";
1	ncSplice	gene	330401020	330401583	.	-	.	gene_id "ENSMODG00000011979"; gene_name "SIL1"; gene_source "ncSplice"; gene_biotype "protein_coding";
1	ncSplice	transcript	330401020	330401583	.	-	.	gene_id "ENSMODG00000011979"; transcript_id "mdCircRNA-14"; gene_name "SIL1"; gene_biotype "protein_coding"; transcript_biotype "circRNA"; oId "lv:circSIL1-204-001|ce:circSIL1-333-001|ts:circSIL1-808-001"; tissue "lv|ce|ts";
1	ncSplice	exon	330401020	330401180	.	-	.	gene_id "ENSMODG00000011979"; transcript_id "mdCircRNA-14"; exon_number "1" gene_name "SIL1"; gene_biotype "protein_coding"; oId "lv:circSIL1-204-001|ce:circSIL1-333-001|ts:circSIL1-808-001"; tissue "lv|ce|ts";
1	ncSplice	exon	330401419	330401583	.	-	.	gene_id "ENSMODG00000011979"; transcript_id "mdCircRNA-14"; exon_number "2" gene_name "SIL1"; gene_biotype "protein_coding"; oId "lv:circSIL1-204-001|ce:circSIL1-333-001|ts:circSIL1-808-001"; tissue "lv|ce|ts";
1	ncSplice	gene	382822243	382823700	.	+	.	gene_id "ENSMODG00000004870"; gene_name "NSD1"; gene_source "ncSplice"; gene_biotype "protein_coding";
1	ncSplice	transcript	382822243	382823700	.	+	.	gene_id "ENSMODG00000004870"; transcript_id "mdCircRNA-15"; gene_name "NSD1"; gene_biotype "protein_coding"; transcript_biotype "circRNA"; oId "lv:circNSD1-229-001|ce:circNSD1-380-001|ts:circNSD1-907-001"; tissue "lv|ce|ts";
1	ncSplice	exon	382822243	382822367	.	+	.	gene_id "ENSMODG00000004870"; transcript_id "mdCircRNA-15"; exon_number "1" gene_name "NSD1"; gene_biotype "protein_coding"; oId "lv:circNSD1-229-001|ce:circNSD1-380-001|ts:circNSD1-907-001"; tissue "lv|ce|ts";
1	ncSplice	exon	382822482	382822749	.	+	.	gene_id "ENSMODG00000004870"; transcript_id "mdCircRNA-15"; exon_number "2" gene_name "NSD1"; gene_biotype "protein_coding"; oId "lv:circNSD1-229-001|ce:circNSD1-380-001|ts:circNSD1-907-001"; tissue "lv|ce|ts";
1	ncSplice	exon	382823591	382823700	.	+	.	gene_id "ENSMODG00000004870"; transcript_id "mdCircRNA-15"; exon_number "3" gene_name "NSD1"; gene_biotype "protein_coding"; oId "lv:circNSD1-229-001|ce:circNSD1-380-001|ts:circNSD1-907-001"; tissue "lv|ce|ts";
1	ncSplice	gene	388770412	388803255	.	-	.	gene_id "ENSMODG00000001818"; gene_name "NA"; gene_source "ncSplice"; gene_biotype "protein_coding";
1	ncSplice	transcript	388770412	388803255	.	-	.	gene_id "ENSMODG00000001818"; transcript_id "mdCircRNA-16"; gene_name "NA"; gene_biotype "protein_coding"; transcript_biotype "circRNA"; oId "lv:circNA-238-001|ce:circNA-396-001"; tissue "lv|ce";
1	ncSplice	exon	388770412	388770520	.	-	.	gene_id "ENSMODG00000001818"; transcript_id "mdCircRNA-16"; exon_number "1" gene_name "NA"; gene_biotype "protein_coding"; oId "lv:circNA-238-001|ce:circNA-396-001"; tissue "lv|ce";
1	ncSplice	exon	388784484	388784541	.	-	.	gene_id "ENSMODG00000001818"; transcript_id "mdCircRNA-16"; exon_number "2" gene_name "NA"; gene_biotype "protein_coding"; oId "lv:circNA-238-001|ce:circNA-396-001"; tissue "lv|ce";
1	ncSplice	exon	388788973	388789045	.	-	.	gene_id "ENSMODG00000001818"; transcript_id "mdCircRNA-16"; exon_number "3" gene_name "NA"; gene_biotype "protein_coding"; oId "lv:circNA-238-001|ce:circNA-396-001"; tissue "lv|ce";
1	ncSplice	exon	388796088	388796195	.	-	.	gene_id "ENSMODG00000001818"; transcript_id "mdCircRNA-16"; exon_number "4" gene_name "NA"; gene_biotype "protein_coding"; oId "lv:circNA-238-001|ce:circNA-396-001"; tissue "lv|ce";
1	ncSplice	exon	388797165	388797260	.	-	.	gene_id "ENSMODG00000001818"; transcript_id "mdCircRNA-16"; exon_number "5" gene_name "NA"; gene_biotype "protein_coding"; oId "lv:circNA-238-001|ce:circNA-396-001"; tissue "lv|ce";
1	ncSplice	exon	388803151	388803255	.	-	.	gene_id "ENSMODG00000001818"; transcript_id "mdCircRNA-16"; exon_number "6" gene_name "NA"; gene_biotype "protein_coding"; oId "lv:circNA-238-001|ce:circNA-396-001"; tissue "lv|ce";
1	ncSplice	gene	393532560	393548080	.	+	.	gene_id "1:393532559:393548080:1"; gene_name "1:393532559:393548080:1"; gene_source "ncSplice"; gene_biotype "novel";
1	ncSplice	transcript	393532560	393548080	.	+	.	gene_id "1:393532559:393548080:1"; transcript_id "mdCircRNA-17"; gene_name "1:393532559:393548080:1"; gene_biotype "novel"; transcript_biotype "circRNA"; oId "lv:circ1:393532559:393548080:1-244-002"; tissue "lv";
1	ncSplice	exon	393532560	393532747	.	+	.	gene_id "1:393532559:393548080:1"; transcript_id "mdCircRNA-17"; exon_number "1" gene_name "1:393532559:393548080:1"; gene_biotype "novel"; oId "lv:circ1:393532559:393548080:1-244-002"; tissue "lv";
1	ncSplice	exon	393544320	393544384	.	+	.	gene_id "1:393532559:393548080:1"; transcript_id "mdCircRNA-17"; exon_number "2" gene_name "1:393532559:393548080:1"; gene_biotype "novel"; oId "lv:circ1:393532559:393548080:1-244-002"; tissue "lv";
1	ncSplice	exon	393547953	393548080	.	+	.	gene_id "1:393532559:393548080:1"; transcript_id "mdCircRNA-17"; exon_number "3" gene_name "1:393532559:393548080:1"; gene_biotype "novel"; oId "lv:circ1:393532559:393548080:1-244-002"; tissue "lv";
1	ncSplice	gene	393532560	393569516	.	+	.	gene_id "1:393532559:393569516:1"; gene_name "1:393532559:393569516:1"; gene_source "ncSplice"; gene_biotype "novel";
1	ncSplice	transcript	393532560	393569516	.	+	.	gene_id "1:393532559:393569516:1"; transcript_id "mdCircRNA-18"; gene_name "1:393532559:393569516:1"; gene_biotype "novel"; transcript_biotype "circRNA"; oId "lv:circ1:393532559:393569516:1-245-003"; tissue "lv";
1	ncSplice	exon	393532560	393532747	.	+	.	gene_id "1:393532559:393569516:1"; transcript_id "mdCircRNA-18"; exon_number "1" gene_name "1:393532559:393569516:1"; gene_biotype "novel"; oId "lv:circ1:393532559:393569516:1-245-003"; tissue "lv";
1	ncSplice	exon	393547953	393548080	.	+	.	gene_id "1:393532559:393569516:1"; transcript_id "mdCircRNA-18"; exon_number "2" gene_name "1:393532559:393569516:1"; gene_biotype "novel"; oId "lv:circ1:393532559:393569516:1-245-003"; tissue "lv";
1	ncSplice	exon	393569420	393569516	.	+	.	gene_id "1:393532559:393569516:1"; transcript_id "mdCircRNA-18"; exon_number "3" gene_name "1:393532559:393569516:1"; gene_biotype "novel"; oId "lv:circ1:393532559:393569516:1-245-003"; tissue "lv";
1	ncSplice	gene	413703146	413730662	.	-	.	gene_id "ENSMODG00000019641"; gene_name "C5"; gene_source "ncSplice"; gene_biotype "protein_coding";
1	ncSplice	transcript	413703146	413730662	.	-	.	gene_id "ENSMODG00000019641"; transcript_id "mdCircRNA-19"; gene_name "C5"; gene_biotype "protein_coding"; transcript_biotype "circRNA"; oId "lv:circC5-258-001"; tissue "lv";
1	ncSplice	exon	413703146	413703248	.	-	.	gene_id "ENSMODG00000019641"; transcript_id "mdCircRNA-19"; exon_number "1" gene_name "C5"; gene_biotype "protein_coding"; oId "lv:circC5-258-001"; tissue "lv";
1	ncSplice	exon	413708424	413708481	.	-	.	gene_id "ENSMODG00000019641"; transcript_id "mdCircRNA-19"; exon_number "2" gene_name "C5"; gene_biotype "protein_coding"; oId "lv:circC5-258-001"; tissue "lv";
1	ncSplice	exon	413713320	413713401	.	-	.	gene_id "ENSMODG00000019641"; transcript_id "mdCircRNA-19"; exon_number "3" gene_name "C5"; gene_biotype "protein_coding"; oId "lv:circC5-258-001"; tissue "lv";
1	ncSplice	exon	413716537	413716599	.	-	.	gene_id "ENSMODG00000019641"; transcript_id "mdCircRNA-19"; exon_number "4" gene_name "C5"; gene_biotype "protein_coding"; oId "lv:circC5-258-001"; tissue "lv";
1	ncSplice	exon	413719907	413720059	.	-	.	gene_id "ENSMODG00000019641"; transcript_id "mdCircRNA-19"; exon_number "5" gene_name "C5"; gene_biotype "protein_coding"; oId "lv:circC5-258-001"; tissue "lv";
1	ncSplice	exon	413722180	413722385	.	-	.	gene_id "ENSMODG00000019641"; transcript_id "mdCircRNA-19"; exon_number "6" gene_name "C5"; gene_biotype "protein_coding"; oId "lv:circC5-258-001"; tissue "lv";
1	ncSplice	exon	413724760	413724931	.	-	.	gene_id "ENSMODG00000019641"; transcript_id "mdCircRNA-19"; exon_number "7" gene_name "C5"; gene_biotype "protein_coding"; oId "lv:circC5-258-001"; tissue "lv";
1	ncSplice	exon	413728882	413728977	.	-	.	gene_id "ENSMODG00000019641"; transcript_id "mdCircRNA-19"; exon_number "8" gene_name "C5"; gene_biotype "protein_coding"; oId "lv:circC5-258-001"; tissue "lv";
1	ncSplice	exon	413730503	413730662	.	-	.	gene_id "ENSMODG00000019641"; transcript_id "mdCircRNA-19"; exon_number "9" gene_name "C5"; gene_biotype "protein_coding"; oId "lv:circC5-258-001"; tissue "lv";
1	ncSplice	gene	420482576	420487448	.	-	.	gene_id "ENSMODG00000019775"; gene_name "MAPKAP1"; gene_source "ncSplice"; gene_biotype "protein_coding";
1	ncSplice	transcript	420482576	420487448	.	-	.	gene_id "ENSMODG00000019775"; transcript_id "mdCircRNA-20"; gene_name "MAPKAP1"; gene_biotype "protein_coding"; transcript_biotype "circRNA"; oId "lv:circMAPKAP1-270-001|ce:circMAPKAP1-439-001|ts:circMAPKAP1-1061-001"; tissue "lv|ce|ts";
1	ncSplice	exon	420482576	420482665	.	-	.	gene_id "ENSMODG00000019775"; transcript_id "mdCircRNA-20"; exon_number "1" gene_name "MAPKAP1"; gene_biotype "protein_coding"; oId "lv:circMAPKAP1-270-001|ce:circMAPKAP1-439-001|ts:circMAPKAP1-1061-001"; tissue "lv|ce|ts";
1	ncSplice	exon	420487125	420487448	.	-	.	gene_id "ENSMODG00000019775"; transcript_id "mdCircRNA-20"; exon_number "2" gene_name "MAPKAP1"; gene_biotype "protein_coding"; oId "lv:circMAPKAP1-270-001|ce:circMAPKAP1-439-001|ts:circMAPKAP1-1061-001"; tissue "lv|ce|ts";
1	ncSplice	gene	439352690	439364128	.	-	.	gene_id "ENSMODG00000013057"; gene_name "NA"; gene_source "ncSplice"; gene_biotype "protein_coding";
1	ncSplice	transcript	439352690	439364128	.	-	.	gene_id "ENSMODG00000013057"; transcript_id "mdCircRNA-21"; gene_name "NA"; gene_biotype "protein_coding"; transcript_biotype "circRNA"; oId "lv:circNA-278-001|ce:circNA-454-001|ts:circNA-1102-001"; tissue "lv|ce|ts";
1	ncSplice	exon	439352690	439352746	.	-	.	gene_id "ENSMODG00000013057"; transcript_id "mdCircRNA-21"; exon_number "1" gene_name "NA"; gene_biotype "protein_coding"; oId "lv:circNA-278-001|ce:circNA-454-001|ts:circNA-1102-001"; tissue "lv|ce|ts";
1	ncSplice	exon	439354624	439354735	.	-	.	gene_id "ENSMODG00000013057"; transcript_id "mdCircRNA-21"; exon_number "2" gene_name "NA"; gene_biotype "protein_coding"; oId "lv:circNA-278-001|ce:circNA-454-001|ts:circNA-1102-001"; tissue "lv|ce|ts";
1	ncSplice	exon	439358053	439358188	.	-	.	gene_id "ENSMODG00000013057"; transcript_id "mdCircRNA-21"; exon_number "3" gene_name "NA"; gene_biotype "protein_coding"; oId "lv:circNA-278-001|ce:circNA-454-001|ts:circNA-1102-001"; tissue "lv|ce|ts";
1	ncSplice	exon	439358506	439358613	.	-	.	gene_id "ENSMODG00000013057"; transcript_id "mdCircRNA-21"; exon_number "4" gene_name "NA"; gene_biotype "protein_coding"; oId "lv:circNA-278-001|ce:circNA-454-001|ts:circNA-1102-001"; tissue "lv|ce|ts";
1	ncSplice	exon	439363357	439363432	.	-	.	gene_id "ENSMODG00000013057"; transcript_id "mdCircRNA-21"; exon_number "5" gene_name "NA"; gene_biotype "protein_coding"; oId "lv:circNA-278-001|ce:circNA-454-001|ts:circNA-1102-001"; tissue "lv|ce|ts";
1	ncSplice	exon	439364005	439364128	.	-	.	gene_id "ENSMODG00000013057"; transcript_id "mdCircRNA-21"; exon_number "6" gene_name "NA"; gene_biotype "protein_coding"; oId "lv:circNA-278-001|ce:circNA-454-001|ts:circNA-1102-001"; tissue "lv|ce|ts";
1	ncSplice	gene	469545276	469556570	.	+	.	gene_id "ENSMODG00000017244"; gene_name "MAN1B1"; gene_source "ncSplice"; gene_biotype "protein_coding";
1	ncSplice	transcript	469545276	469556570	.	+	.	gene_id "ENSMODG00000017244"; transcript_id "mdCircRNA-22"; gene_name "MAN1B1"; gene_biotype "protein_coding"; transcript_biotype "circRNA"; oId "lv:circMAN1B1-308-001"; tissue "lv";
1	ncSplice	exon	469545276	469545403	.	+	.	gene_id "ENSMODG00000017244"; transcript_id "mdCircRNA-22"; exon_number "1" gene_name "MAN1B1"; gene_biotype "protein_coding"; oId "lv:circMAN1B1-308-001"; tissue "lv";
1	ncSplice	exon	469548469	469548623	.	+	.	gene_id "ENSMODG00000017244"; transcript_id "mdCircRNA-22"; exon_number "2" gene_name "MAN1B1"; gene_biotype "protein_coding"; oId "lv:circMAN1B1-308-001"; tissue "lv";
1	ncSplice	exon	469551515	469551624	.	+	.	gene_id "ENSMODG00000017244"; transcript_id "mdCircRNA-22"; exon_number "3" gene_name "MAN1B1"; gene_biotype "protein_coding"; oId "lv:circMAN1B1-308-001"; tissue "lv";
1	ncSplice	exon	469556204	469556570	.	+	.	gene_id "ENSMODG00000017244"; transcript_id "mdCircRNA-22"; exon_number "4" gene_name "MAN1B1"; gene_biotype "protein_coding"; oId "lv:circMAN1B1-308-001"; tissue "lv";
1	ncSplice	gene	471294889	471309954	.	+	.	gene_id "ENSMODG00000017113"; gene_name "EHMT1"; gene_source "ncSplice"; gene_biotype "protein_coding";
1	ncSplice	transcript	471294889	471309954	.	+	.	gene_id "ENSMODG00000017113"; transcript_id "mdCircRNA-23"; gene_name "EHMT1"; gene_biotype "protein_coding"; transcript_biotype "circRNA"; oId "lv:circEHMT1-315-003"; tissue "lv";
1	ncSplice	exon	471294889	471295069	.	+	.	gene_id "ENSMODG00000017113"; transcript_id "mdCircRNA-23"; exon_number "1" gene_name "EHMT1"; gene_biotype "protein_coding"; oId "lv:circEHMT1-315-003"; tissue "lv";
1	ncSplice	exon	471306105	471306241	.	+	.	gene_id "ENSMODG00000017113"; transcript_id "mdCircRNA-23"; exon_number "2" gene_name "EHMT1"; gene_biotype "protein_coding"; oId "lv:circEHMT1-315-003"; tissue "lv";
1	ncSplice	exon	471306763	471306951	.	+	.	gene_id "ENSMODG00000017113"; transcript_id "mdCircRNA-23"; exon_number "3" gene_name "EHMT1"; gene_biotype "protein_coding"; oId "lv:circEHMT1-315-003"; tissue "lv";
1	ncSplice	exon	471308664	471308744	.	+	.	gene_id "ENSMODG00000017113"; transcript_id "mdCircRNA-23"; exon_number "4" gene_name "EHMT1"; gene_biotype "protein_coding"; oId "lv:circEHMT1-315-003"; tissue "lv";
1	ncSplice	exon	471309834	471309954	.	+	.	gene_id "ENSMODG00000017113"; transcript_id "mdCircRNA-23"; exon_number "5" gene_name "EHMT1"; gene_biotype "protein_coding"; oId "lv:circEHMT1-315-003"; tissue "lv";
1	ncSplice	gene	506519235	506545383	.	-	.	gene_id "ENSMODG00000015832"; gene_name "ASXL2"; gene_source "ncSplice"; gene_biotype "protein_coding";
1	ncSplice	transcript	506519235	506545383	.	-	.	gene_id "ENSMODG00000015832"; transcript_id "mdCircRNA-24"; gene_name "ASXL2"; gene_biotype "protein_coding"; transcript_biotype "circRNA"; oId "lv:circASXL2-350-001|ce:circASXL2-561-001|ts:circASXL2-1370-001"; tissue "lv|ce|ts";
1	ncSplice	exon	506519235	506519385	.	-	.	gene_id "ENSMODG00000015832"; transcript_id "mdCircRNA-24"; exon_number "1" gene_name "ASXL2"; gene_biotype "protein_coding"; oId "lv:circASXL2-350-001|ce:circASXL2-561-001|ts:circASXL2-1370-001"; tissue "lv|ce|ts";
1	ncSplice	exon	506523955	506524066	.	-	.	gene_id "ENSMODG00000015832"; transcript_id "mdCircRNA-24"; exon_number "2" gene_name "ASXL2"; gene_biotype "protein_coding"; oId "lv:circASXL2-350-001|ce:circASXL2-561-001|ts:circASXL2-1370-001"; tissue "lv|ce|ts";
1	ncSplice	exon	506545301	506545383	.	-	.	gene_id "ENSMODG00000015832"; transcript_id "mdCircRNA-24"; exon_number "3" gene_name "ASXL2"; gene_biotype "protein_coding"; oId "lv:circASXL2-350-001|ce:circASXL2-561-001|ts:circASXL2-1370-001"; tissue "lv|ce|ts";
1	ncSplice	gene	594283226	594286420	.	+	.	gene_id "ENSMODG00000006612"; gene_name "ZC3H6"; gene_source "ncSplice"; gene_biotype "protein_coding";
1	ncSplice	transcript	594283226	594286420	.	+	.	gene_id "ENSMODG00000006612"; transcript_id "mdCircRNA-25"; gene_name "ZC3H6"; gene_biotype "protein_coding"; transcript_biotype "circRNA"; oId "lv:circZC3H6-400-001|ts:circZC3H6-1613-001"; tissue "lv|ts";
1	ncSplice	exon	594283226	594284294	.	+	.	gene_id "ENSMODG00000006612"; transcript_id "mdCircRNA-25"; exon_number "1" gene_name "ZC3H6"; gene_biotype "protein_coding"; oId "lv:circZC3H6-400-001|ts:circZC3H6-1613-001"; tissue "lv|ts";
1	ncSplice	exon	594286298	594286420	.	+	.	gene_id "ENSMODG00000006612"; transcript_id "mdCircRNA-25"; exon_number "2" gene_name "ZC3H6"; gene_biotype "protein_coding"; oId "lv:circZC3H6-400-001|ts:circZC3H6-1613-001"; tissue "lv|ts";
1	ncSplice	gene	621759650	621776742	.	+	.	gene_id "ENSMODG00000003735"; gene_name "GPCPD1"; gene_source "ncSplice"; gene_biotype "protein_coding";
1	ncSplice	transcript	621759650	621776742	.	+	.	gene_id "ENSMODG00000003735"; transcript_id "mdCircRNA-26"; gene_name "GPCPD1"; gene_biotype "protein_coding"; transcript_biotype "circRNA"; oId "lv:circGPCPD1-411-001"; tissue "lv";
1	ncSplice	exon	621759650	621759782	.	+	.	gene_id "ENSMODG00000003735"; transcript_id "mdCircRNA-26"; exon_number "1" gene_name "GPCPD1"; gene_biotype "protein_coding"; oId "lv:circGPCPD1-411-001"; tissue "lv";
1	ncSplice	exon	621762395	621762449	.	+	.	gene_id "ENSMODG00000003735"; transcript_id "mdCircRNA-26"; exon_number "2" gene_name "GPCPD1"; gene_biotype "protein_coding"; oId "lv:circGPCPD1-411-001"; tissue "lv";
1	ncSplice	exon	621765629	621765721	.	+	.	gene_id "ENSMODG00000003735"; transcript_id "mdCircRNA-26"; exon_number "3" gene_name "GPCPD1"; gene_biotype "protein_coding"; oId "lv:circGPCPD1-411-001"; tissue "lv";
1	ncSplice	exon	621766008	621769804	.	+	.	gene_id "ENSMODG00000003735"; transcript_id "mdCircRNA-26"; exon_number "4" gene_name "GPCPD1"; gene_biotype "protein_coding"; oId "lv:circGPCPD1-411-001"; tissue "lv";
1	ncSplice	exon	621769929	621769991	.	+	.	gene_id "ENSMODG00000003735"; transcript_id "mdCircRNA-26"; exon_number "5" gene_name "GPCPD1"; gene_biotype "protein_coding"; oId "lv:circGPCPD1-411-001"; tissue "lv";
1	ncSplice	exon	621774479	621774518	.	+	.	gene_id "ENSMODG00000003735"; transcript_id "mdCircRNA-26"; exon_number "6" gene_name "GPCPD1"; gene_biotype "protein_coding"; oId "lv:circGPCPD1-411-001"; tissue "lv";
1	ncSplice	exon	621776687	621776742	.	+	.	gene_id "ENSMODG00000003735"; transcript_id "mdCircRNA-26"; exon_number "7" gene_name "GPCPD1"; gene_biotype "protein_coding"; oId "lv:circGPCPD1-411-001"; tissue "lv";
1	ncSplice	gene	697339540	697342525	.	+	.	gene_id "ENSMODG00000003715"; gene_name "SPG7"; gene_source "ncSplice"; gene_biotype "protein_coding";
1	ncSplice	transcript	697339540	697342525	.	+	.	gene_id "ENSMODG00000003715"; transcript_id "mdCircRNA-27"; gene_name "SPG7"; gene_biotype "protein_coding"; transcript_biotype "circRNA"; oId "lv:circSPG7-443-001"; tissue "lv";
1	ncSplice	exon	697339540	697339642	.	+	.	gene_id "ENSMODG00000003715"; transcript_id "mdCircRNA-27"; exon_number "1" gene_name "SPG7"; gene_biotype "protein_coding"; oId "lv:circSPG7-443-001"; tissue "lv";
1	ncSplice	exon	697342052	697342123	.	+	.	gene_id "ENSMODG00000003715"; transcript_id "mdCircRNA-27"; exon_number "2" gene_name "SPG7"; gene_biotype "protein_coding"; oId "lv:circSPG7-443-001"; tissue "lv";
1	ncSplice	exon	697342436	697342525	.	+	.	gene_id "ENSMODG00000003715"; transcript_id "mdCircRNA-27"; exon_number "3" gene_name "SPG7"; gene_biotype "protein_coding"; oId "lv:circSPG7-443-001"; tissue "lv";
1	ncSplice	gene	74811864	74827949	.	+	.	gene_id "ENSMODG00000004627"; gene_name "TM9SF3"; gene_source "ncSplice"; gene_biotype "protein_coding";
1	ncSplice	transcript	74811864	74827949	.	+	.	gene_id "ENSMODG00000004627"; transcript_id "mdCircRNA-28"; gene_name "TM9SF3"; gene_biotype "protein_coding"; transcript_biotype "circRNA"; oId "lv:circTM9SF3-475-004"; tissue "lv";
1	ncSplice	exon	74811864	74812059	.	+	.	gene_id "ENSMODG00000004627"; transcript_id "mdCircRNA-28"; exon_number "1" gene_name "TM9SF3"; gene_biotype "protein_coding"; oId "lv:circTM9SF3-475-004"; tissue "lv";
1	ncSplice	exon	74818749	74818871	.	+	.	gene_id "ENSMODG00000004627"; transcript_id "mdCircRNA-28"; exon_number "2" gene_name "TM9SF3"; gene_biotype "protein_coding"; oId "lv:circTM9SF3-475-004"; tissue "lv";
1	ncSplice	exon	74826663	74826823	.	+	.	gene_id "ENSMODG00000004627"; transcript_id "mdCircRNA-28"; exon_number "3" gene_name "TM9SF3"; gene_biotype "protein_coding"; oId "lv:circTM9SF3-475-004"; tissue "lv";
1	ncSplice	exon	74827872	74827949	.	+	.	gene_id "ENSMODG00000004627"; transcript_id "mdCircRNA-28"; exon_number "4" gene_name "TM9SF3"; gene_biotype "protein_coding"; oId "lv:circTM9SF3-475-004"; tissue "lv";
1	ncSplice	gene	86701444	86725431	.	+	.	gene_id "ENSMODG00000008525"; gene_name "FGFR2"; gene_source "ncSplice"; gene_biotype "protein_coding";
1	ncSplice	transcript	86701444	86725431	.	+	.	gene_id "ENSMODG00000008525"; transcript_id "mdCircRNA-29"; gene_name "FGFR2"; gene_biotype "protein_coding"; transcript_biotype "circRNA"; oId "lv:circFGFR2-493-001|ce:circFGFR2-780-001"; tissue "lv|ce";
1	ncSplice	exon	86701444	86701710	.	+	.	gene_id "ENSMODG00000008525"; transcript_id "mdCircRNA-29"; exon_number "1" gene_name "FGFR2"; gene_biotype "protein_coding"; oId "lv:circFGFR2-493-001|ce:circFGFR2-780-001"; tissue "lv|ce";
1	ncSplice	exon	86703506	86703580	.	+	.	gene_id "ENSMODG00000008525"; transcript_id "mdCircRNA-29"; exon_number "2" gene_name "FGFR2"; gene_biotype "protein_coding"; oId "lv:circFGFR2-493-001|ce:circFGFR2-780-001"; tissue "lv|ce";
1	ncSplice	exon	86714003	86714172	.	+	.	gene_id "ENSMODG00000008525"; transcript_id "mdCircRNA-29"; exon_number "3" gene_name "FGFR2"; gene_biotype "protein_coding"; oId "lv:circFGFR2-493-001|ce:circFGFR2-780-001"; tissue "lv|ce";
1	ncSplice	exon	86725308	86725431	.	+	.	gene_id "ENSMODG00000008525"; transcript_id "mdCircRNA-29"; exon_number "4" gene_name "FGFR2"; gene_biotype "protein_coding"; oId "lv:circFGFR2-493-001|ce:circFGFR2-780-001"; tissue "lv|ce";
1	ncSplice	gene	90494918	90562961	.	+	.	gene_id "ENSMODG00000009365"; gene_name "CACUL1"; gene_source "ncSplice"; gene_biotype "protein_coding";
1	ncSplice	transcript	90494918	90562961	.	+	.	gene_id "ENSMODG00000009365"; transcript_id "mdCircRNA-30"; gene_name "CACUL1"; gene_biotype "protein_coding"; transcript_biotype "circRNA"; oId "lv:circCACUL1-499-001|ce:circCACUL1-787-001|ts:circCACUL1-2041-001"; tissue "lv|ce|ts";
1	ncSplice	exon	90494918	90495044	.	+	.	gene_id "ENSMODG00000009365"; transcript_id "mdCircRNA-30"; exon_number "1" gene_name "CACUL1"; gene_biotype "protein_coding"; oId "lv:circCACUL1-499-001|ce:circCACUL1-787-001|ts:circCACUL1-2041-001"; tissue "lv|ce|ts";
1	ncSplice	exon	90499162	90499264	.	+	.	gene_id "ENSMODG00000009365"; transcript_id "mdCircRNA-30"; exon_number "2" gene_name "CACUL1"; gene_biotype "protein_coding"; oId "lv:circCACUL1-499-001|ce:circCACUL1-787-001|ts:circCACUL1-2041-001"; tissue "lv|ce|ts";
1	ncSplice	exon	90543591	90543686	.	+	.	gene_id "ENSMODG00000009365"; transcript_id "mdCircRNA-30"; exon_number "3" gene_name "CACUL1"; gene_biotype "protein_coding"; oId "lv:circCACUL1-499-001|ce:circCACUL1-787-001|ts:circCACUL1-2041-001"; tissue "lv|ce|ts";
1	ncSplice	exon	90548049	90548151	.	+	.	gene_id "ENSMODG00000009365"; transcript_id "mdCircRNA-30"; exon_number "4" gene_name "CACUL1"; gene_biotype "protein_coding"; oId "lv:circCACUL1-499-001|ce:circCACUL1-787-001|ts:circCACUL1-2041-001"; tissue "lv|ce|ts";
1	ncSplice	exon	90557926	90558015	.	+	.	gene_id "ENSMODG00000009365"; transcript_id "mdCircRNA-30"; exon_number "5" gene_name "CACUL1"; gene_biotype "protein_coding"; oId "lv:circCACUL1-499-001|ce:circCACUL1-787-001|ts:circCACUL1-2041-001"; tissue "lv|ce|ts";
1	ncSplice	exon	90562823	90562961	.	+	.	gene_id "ENSMODG00000009365"; transcript_id "mdCircRNA-30"; exon_number "6" gene_name "CACUL1"; gene_biotype "protein_coding"; oId "lv:circCACUL1-499-001|ce:circCACUL1-787-001|ts:circCACUL1-2041-001"; tissue "lv|ce|ts";
2	ncSplice	gene	114127470	114148771	.	+	.	gene_id "ENSMODG00000029507"; gene_name "NA"; gene_source "ncSplice"; gene_biotype "protein_coding";
2	ncSplice	transcript	114127470	114148771	.	+	.	gene_id "ENSMODG00000029507"; transcript_id "mdCircRNA-31"; gene_name "NA"; gene_biotype "protein_coding"; transcript_biotype "circRNA"; oId "lv:circNA-523-003"; tissue "lv";
2	ncSplice	exon	114127470	114127661	.	+	.	gene_id "ENSMODG00000029507"; transcript_id "mdCircRNA-31"; exon_number "1" gene_name "NA"; gene_biotype "protein_coding"; oId "lv:circNA-523-003"; tissue "lv";
2	ncSplice	exon	114129445	114129544	.	+	.	gene_id "ENSMODG00000029507"; transcript_id "mdCircRNA-31"; exon_number "2" gene_name "NA"; gene_biotype "protein_coding"; oId "lv:circNA-523-003"; tissue "lv";
2	ncSplice	exon	114139248	114139333	.	+	.	gene_id "ENSMODG00000029507"; transcript_id "mdCircRNA-31"; exon_number "3" gene_name "NA"; gene_biotype "protein_coding"; oId "lv:circNA-523-003"; tissue "lv";
2	ncSplice	exon	114145709	114145903	.	+	.	gene_id "ENSMODG00000029507"; transcript_id "mdCircRNA-31"; exon_number "4" gene_name "NA"; gene_biotype "protein_coding"; oId "lv:circNA-523-003"; tissue "lv";
2	ncSplice	exon	114148705	114148771	.	+	.	gene_id "ENSMODG00000029507"; transcript_id "mdCircRNA-31"; exon_number "5" gene_name "NA"; gene_biotype "protein_coding"; oId "lv:circNA-523-003"; tissue "lv";
2	ncSplice	gene	12191212	12202725	.	-	.	gene_id "ENSMODG00000011855"; gene_name "KIAA1107"; gene_source "ncSplice"; gene_biotype "protein_coding";
2	ncSplice	transcript	12191212	12202725	.	-	.	gene_id "ENSMODG00000011855"; transcript_id "mdCircRNA-32"; gene_name "KIAA1107"; gene_biotype "protein_coding"; transcript_biotype "circRNA"; oId "lv:circKIAA1107-530-001|ce:circKIAA1107-833-001|ts:circKIAA1107-2140-001"; tissue "lv|ce|ts";
2	ncSplice	exon	12191212	12191314	.	-	.	gene_id "ENSMODG00000011855"; transcript_id "mdCircRNA-32"; exon_number "1" gene_name "KIAA1107"; gene_biotype "protein_coding"; oId "lv:circKIAA1107-530-001|ce:circKIAA1107-833-001|ts:circKIAA1107-2140-001"; tissue "lv|ce|ts";
2	ncSplice	exon	12191757	12191845	.	-	.	gene_id "ENSMODG00000011855"; transcript_id "mdCircRNA-32"; exon_number "2" gene_name "KIAA1107"; gene_biotype "protein_coding"; oId "lv:circKIAA1107-530-001|ce:circKIAA1107-833-001|ts:circKIAA1107-2140-001"; tissue "lv|ce|ts";
2	ncSplice	exon	12198929	12199025	.	-	.	gene_id "ENSMODG00000011855"; transcript_id "mdCircRNA-32"; exon_number "3" gene_name "KIAA1107"; gene_biotype "protein_coding"; oId "lv:circKIAA1107-530-001|ce:circKIAA1107-833-001|ts:circKIAA1107-2140-001"; tissue "lv|ce|ts";
2	ncSplice	exon	12202645	12202725	.	-	.	gene_id "ENSMODG00000011855"; transcript_id "mdCircRNA-32"; exon_number "4" gene_name "KIAA1107"; gene_biotype "protein_coding"; oId "lv:circKIAA1107-530-001|ce:circKIAA1107-833-001|ts:circKIAA1107-2140-001"; tissue "lv|ce|ts";
2	ncSplice	gene	122631082	122646731	.	+	.	gene_id "ENSMODG00000003211"; gene_name "PROX1"; gene_source "ncSplice"; gene_biotype "protein_coding";
2	ncSplice	transcript	122631082	122646731	.	+	.	gene_id "ENSMODG00000003211"; transcript_id "mdCircRNA-33"; gene_name "PROX1"; gene_biotype "protein_coding"; transcript_biotype "circRNA"; oId "lv:circPROX1-532-002"; tissue "lv";
2	ncSplice	exon	122631082	122632872	.	+	.	gene_id "ENSMODG00000003211"; transcript_id "mdCircRNA-33"; exon_number "1" gene_name "PROX1"; gene_biotype "protein_coding"; oId "lv:circPROX1-532-002"; tissue "lv";
2	ncSplice	exon	122640208	122640313	.	+	.	gene_id "ENSMODG00000003211"; transcript_id "mdCircRNA-33"; exon_number "2" gene_name "PROX1"; gene_biotype "protein_coding"; oId "lv:circPROX1-532-002"; tissue "lv";
2	ncSplice	exon	122646537	122646731	.	+	.	gene_id "ENSMODG00000003211"; transcript_id "mdCircRNA-33"; exon_number "3" gene_name "PROX1"; gene_biotype "protein_coding"; oId "lv:circPROX1-532-002"; tissue "lv";
2	ncSplice	gene	133633804	133634150	.	+	.	gene_id "ENSMODG00000004743"; gene_name "MIA3"; gene_source "ncSplice"; gene_biotype "protein_coding";
2	ncSplice	transcript	133633804	133634150	.	+	.	gene_id "ENSMODG00000004743"; transcript_id "mdCircRNA-34"; gene_name "MIA3"; gene_biotype "protein_coding"; transcript_biotype "circRNA"; oId "lv:circMIA3-534-001|ce:circMIA3-844-001|ts:circMIA3-2180-001"; tissue "lv|ce|ts";
2	ncSplice	exon	133633804	133633926	.	+	.	gene_id "ENSMODG00000004743"; transcript_id "mdCircRNA-34"; exon_number "1" gene_name "MIA3"; gene_biotype "protein_coding"; oId "lv:circMIA3-534-001|ce:circMIA3-844-001|ts:circMIA3-2180-001"; tissue "lv|ce|ts";
2	ncSplice	exon	133634021	133634150	.	+	.	gene_id "ENSMODG00000004743"; transcript_id "mdCircRNA-34"; exon_number "2" gene_name "MIA3"; gene_biotype "protein_coding"; oId "lv:circMIA3-534-001|ce:circMIA3-844-001|ts:circMIA3-2180-001"; tissue "lv|ce|ts";
2	ncSplice	gene	190234427	190248454	.	-	.	gene_id "ENSMODG00000017033"; gene_name "ASH1L"; gene_source "ncSplice"; gene_biotype "protein_coding";
2	ncSplice	transcript	190234427	190248454	.	-	.	gene_id "ENSMODG00000017033"; transcript_id "mdCircRNA-35"; gene_name "ASH1L"; gene_biotype "protein_coding"; transcript_biotype "circRNA"; oId "lv:circASH1L-580-001"; tissue "lv";
2	ncSplice	exon	190234427	190234606	.	-	.	gene_id "ENSMODG00000017033"; transcript_id "mdCircRNA-35"; exon_number "1" gene_name "ASH1L"; gene_biotype "protein_coding"; oId "lv:circASH1L-580-001"; tissue "lv";
2	ncSplice	exon	190241458	190242199	.	-	.	gene_id "ENSMODG00000017033"; transcript_id "mdCircRNA-35"; exon_number "2" gene_name "ASH1L"; gene_biotype "protein_coding"; oId "lv:circASH1L-580-001"; tissue "lv";
2	ncSplice	exon	190248353	190248454	.	-	.	gene_id "ENSMODG00000017033"; transcript_id "mdCircRNA-35"; exon_number "3" gene_name "ASH1L"; gene_biotype "protein_coding"; oId "lv:circASH1L-580-001"; tissue "lv";
2	ncSplice	gene	207866935	207878967	.	-	.	gene_id "ENSMODG00000010908"; gene_name "CDC27"; gene_source "ncSplice"; gene_biotype "protein_coding";
2	ncSplice	transcript	207866935	207878967	.	-	.	gene_id "ENSMODG00000010908"; transcript_id "mdCircRNA-36"; gene_name "CDC27"; gene_biotype "protein_coding"; transcript_biotype "circRNA"; oId "lv:circCDC27-604-001|ce:circCDC27-990-001|ts:circCDC27-2460-001"; tissue "lv|ce|ts";
2	ncSplice	exon	207866935	207867142	.	-	.	gene_id "ENSMODG00000010908"; transcript_id "mdCircRNA-36"; exon_number "1" gene_name "CDC27"; gene_biotype "protein_coding"; oId "lv:circCDC27-604-001|ce:circCDC27-990-001|ts:circCDC27-2460-001"; tissue "lv|ce|ts";
2	ncSplice	exon	207868359	207868458	.	-	.	gene_id "ENSMODG00000010908"; transcript_id "mdCircRNA-36"; exon_number "2" gene_name "CDC27"; gene_biotype "protein_coding"; oId "lv:circCDC27-604-001|ce:circCDC27-990-001|ts:circCDC27-2460-001"; tissue "lv|ce|ts";
2	ncSplice	exon	207871931	207872046	.	-	.	gene_id "ENSMODG00000010908"; transcript_id "mdCircRNA-36"; exon_number "3" gene_name "CDC27"; gene_biotype "protein_coding"; oId "lv:circCDC27-604-001|ce:circCDC27-990-001|ts:circCDC27-2460-001"; tissue "lv|ce|ts";
2	ncSplice	exon	207877879	207877993	.	-	.	gene_id "ENSMODG00000010908"; transcript_id "mdCircRNA-36"; exon_number "4" gene_name "CDC27"; gene_biotype "protein_coding"; oId "lv:circCDC27-604-001|ce:circCDC27-990-001|ts:circCDC27-2460-001"; tissue "lv|ce|ts";
2	ncSplice	exon	207878756	207878967	.	-	.	gene_id "ENSMODG00000010908"; transcript_id "mdCircRNA-36"; exon_number "5" gene_name "CDC27"; gene_biotype "protein_coding"; oId "lv:circCDC27-604-001|ce:circCDC27-990-001|ts:circCDC27-2460-001"; tissue "lv|ce|ts";
2	ncSplice	gene	209059010	209072027	.	+	.	gene_id "ENSMODG00000010241"; gene_name "TLK2"; gene_source "ncSplice"; gene_biotype "protein_coding";
2	ncSplice	transcript	209059010	209072027	.	+	.	gene_id "ENSMODG00000010241"; transcript_id "mdCircRNA-37"; gene_name "TLK2"; gene_biotype "protein_coding"; transcript_biotype "circRNA"; oId "lv:circTLK2-607-002|ce:circTLK2-993-001|ts:circTLK2-2472-001"; tissue "lv|ce|ts";
2	ncSplice	exon	209059010	209059177	.	+	.	gene_id "ENSMODG00000010241"; transcript_id "mdCircRNA-37"; exon_number "1" gene_name "TLK2"; gene_biotype "protein_coding"; oId "lv:circTLK2-607-002|ce:circTLK2-993-001|ts:circTLK2-2472-001"; tissue "lv|ce|ts";
2	ncSplice	exon	209062883	209062978	.	+	.	gene_id "ENSMODG00000010241"; transcript_id "mdCircRNA-37"; exon_number "2" gene_name "TLK2"; gene_biotype "protein_coding"; oId "lv:circTLK2-607-002|ce:circTLK2-993-001|ts:circTLK2-2472-001"; tissue "lv|ce|ts";
2	ncSplice	exon	209064202	209064294	.	+	.	gene_id "ENSMODG00000010241"; transcript_id "mdCircRNA-37"; exon_number "3" gene_name "TLK2"; gene_biotype "protein_coding"; oId "lv:circTLK2-607-002|ce:circTLK2-993-001|ts:circTLK2-2472-001"; tissue "lv|ce|ts";
2	ncSplice	exon	209069801	209069911	.	+	.	gene_id "ENSMODG00000010241"; transcript_id "mdCircRNA-37"; exon_number "4" gene_name "TLK2"; gene_biotype "protein_coding"; oId "lv:circTLK2-607-002|ce:circTLK2-993-001|ts:circTLK2-2472-001"; tissue "lv|ce|ts";
2	ncSplice	exon	209071891	209072027	.	+	.	gene_id "ENSMODG00000010241"; transcript_id "mdCircRNA-37"; exon_number "5" gene_name "TLK2"; gene_biotype "protein_coding"; oId "lv:circTLK2-607-002|ce:circTLK2-993-001|ts:circTLK2-2472-001"; tissue "lv|ce|ts";
2	ncSplice	gene	229832721	229838194	.	+	.	gene_id "ENSMODG00000003804"; gene_name "SMURF2"; gene_source "ncSplice"; gene_biotype "protein_coding";
2	ncSplice	transcript	229832721	229838194	.	+	.	gene_id "ENSMODG00000003804"; transcript_id "mdCircRNA-38"; gene_name "SMURF2"; gene_biotype "protein_coding"; transcript_biotype "circRNA"; oId "lv:circSMURF2-641-001|ce:circSMURF2-1018-001|ts:circSMURF2-2543-001"; tissue "lv|ce|ts";
2	ncSplice	exon	229832721	229832786	.	+	.	gene_id "ENSMODG00000003804"; transcript_id "mdCircRNA-38"; exon_number "1" gene_name "SMURF2"; gene_biotype "protein_coding"; oId "lv:circSMURF2-641-001|ce:circSMURF2-1018-001|ts:circSMURF2-2543-001"; tissue "lv|ce|ts";
2	ncSplice	exon	229836129	229836213	.	+	.	gene_id "ENSMODG00000003804"; transcript_id "mdCircRNA-38"; exon_number "2" gene_name "SMURF2"; gene_biotype "protein_coding"; oId "lv:circSMURF2-641-001|ce:circSMURF2-1018-001|ts:circSMURF2-2543-001"; tissue "lv|ce|ts";
2	ncSplice	exon	229838111	229838194	.	+	.	gene_id "ENSMODG00000003804"; transcript_id "mdCircRNA-38"; exon_number "3" gene_name "SMURF2"; gene_biotype "protein_coding"; oId "lv:circSMURF2-641-001|ce:circSMURF2-1018-001|ts:circSMURF2-2543-001"; tissue "lv|ce|ts";
2	ncSplice	gene	229848812	229871640	.	+	.	gene_id "ENSMODG00000003804"; gene_name "SMURF2"; gene_source "ncSplice"; gene_biotype "protein_coding";
2	ncSplice	transcript	229848812	229871640	.	+	.	gene_id "ENSMODG00000003804"; transcript_id "mdCircRNA-39"; gene_name "SMURF2"; gene_biotype "protein_coding"; transcript_biotype "circRNA"; oId "lv:circSMURF2-644-001|ce:circSMURF2-1019-001|ts:circSMURF2-2547-001"; tissue "lv|ce|ts";
2	ncSplice	exon	229848812	229848896	.	+	.	gene_id "ENSMODG00000003804"; transcript_id "mdCircRNA-39"; exon_number "1" gene_name "SMURF2"; gene_biotype "protein_coding"; oId "lv:circSMURF2-644-001|ce:circSMURF2-1019-001|ts:circSMURF2-2547-001"; tissue "lv|ce|ts";
2	ncSplice	exon	229860367	229860525	.	+	.	gene_id "ENSMODG00000003804"; transcript_id "mdCircRNA-39"; exon_number "2" gene_name "SMURF2"; gene_biotype "protein_coding"; oId "lv:circSMURF2-644-001|ce:circSMURF2-1019-001|ts:circSMURF2-2547-001"; tissue "lv|ce|ts";
2	ncSplice	exon	229865776	229865968	.	+	.	gene_id "ENSMODG00000003804"; transcript_id "mdCircRNA-39"; exon_number "3" gene_name "SMURF2"; gene_biotype "protein_coding"; oId "lv:circSMURF2-644-001|ce:circSMURF2-1019-001|ts:circSMURF2-2547-001"; tissue "lv|ce|ts";
2	ncSplice	exon	229868171	229868274	.	+	.	gene_id "ENSMODG00000003804"; transcript_id "mdCircRNA-39"; exon_number "4" gene_name "SMURF2"; gene_biotype "protein_coding"; oId "lv:circSMURF2-644-001|ce:circSMURF2-1019-001|ts:circSMURF2-2547-001"; tissue "lv|ce|ts";
2	ncSplice	exon	229871526	229871640	.	+	.	gene_id "ENSMODG00000003804"; transcript_id "mdCircRNA-39"; exon_number "5" gene_name "SMURF2"; gene_biotype "protein_coding"; oId "lv:circSMURF2-644-001|ce:circSMURF2-1019-001|ts:circSMURF2-2547-001"; tissue "lv|ce|ts";
2	ncSplice	gene	261100121	261111458	.	-	.	gene_id "ENSMODG00000008064"; gene_name "ELAC2"; gene_source "ncSplice"; gene_biotype "protein_coding";
2	ncSplice	transcript	261100121	261111458	.	-	.	gene_id "ENSMODG00000008064"; transcript_id "mdCircRNA-40"; gene_name "ELAC2"; gene_biotype "protein_coding"; transcript_biotype "circRNA"; oId "lv:circELAC2-663-002|ts:circELAC2-2664-001"; tissue "lv|ts";
2	ncSplice	exon	261100121	261100259	.	-	.	gene_id "ENSMODG00000008064"; transcript_id "mdCircRNA-40"; exon_number "1" gene_name "ELAC2"; gene_biotype "protein_coding"; oId "lv:circELAC2-663-002|ts:circELAC2-2664-001"; tissue "lv|ts";
2	ncSplice	exon	261105444	261105540	.	-	.	gene_id "ENSMODG00000008064"; transcript_id "mdCircRNA-40"; exon_number "2" gene_name "ELAC2"; gene_biotype "protein_coding"; oId "lv:circELAC2-663-002|ts:circELAC2-2664-001"; tissue "lv|ts";
2	ncSplice	exon	261106566	261106684	.	-	.	gene_id "ENSMODG00000008064"; transcript_id "mdCircRNA-40"; exon_number "3" gene_name "ELAC2"; gene_biotype "protein_coding"; oId "lv:circELAC2-663-002|ts:circELAC2-2664-001"; tissue "lv|ts";
2	ncSplice	exon	261111151	261111236	.	-	.	gene_id "ENSMODG00000008064"; transcript_id "mdCircRNA-40"; exon_number "4" gene_name "ELAC2"; gene_biotype "protein_coding"; oId "lv:circELAC2-663-002|ts:circELAC2-2664-001"; tissue "lv|ts";
2	ncSplice	exon	261111320	261111458	.	-	.	gene_id "ENSMODG00000008064"; transcript_id "mdCircRNA-40"; exon_number "5" gene_name "ELAC2"; gene_biotype "protein_coding"; oId "lv:circELAC2-663-002|ts:circELAC2-2664-001"; tissue "lv|ts";
2	ncSplice	gene	292507283	292520745	.	-	.	gene_id "ENSMODG00000018894"; gene_name "CYP39A1"; gene_source "ncSplice"; gene_biotype "protein_coding";
2	ncSplice	transcript	292507283	292520745	.	-	.	gene_id "ENSMODG00000018894"; transcript_id "mdCircRNA-41"; gene_name "CYP39A1"; gene_biotype "protein_coding"; transcript_biotype "circRNA"; oId "lv:circCYP39A1-702-001"; tissue "lv";
2	ncSplice	exon	292507283	292507371	.	-	.	gene_id "ENSMODG00000018894"; transcript_id "mdCircRNA-41"; exon_number "1" gene_name "CYP39A1"; gene_biotype "protein_coding"; oId "lv:circCYP39A1-702-001"; tissue "lv";
2	ncSplice	exon	292508264	292508359	.	-	.	gene_id "ENSMODG00000018894"; transcript_id "mdCircRNA-41"; exon_number "2" gene_name "CYP39A1"; gene_biotype "protein_coding"; oId "lv:circCYP39A1-702-001"; tissue "lv";
2	ncSplice	exon	292520612	292520745	.	-	.	gene_id "ENSMODG00000018894"; transcript_id "mdCircRNA-41"; exon_number "3" gene_name "CYP39A1"; gene_biotype "protein_coding"; oId "lv:circCYP39A1-702-001"; tissue "lv";
2	ncSplice	gene	292507283	292553548	.	-	.	gene_id "ENSMODG00000018894"; gene_name "CYP39A1"; gene_source "ncSplice"; gene_biotype "protein_coding";
2	ncSplice	transcript	292507283	292553548	.	-	.	gene_id "ENSMODG00000018894"; transcript_id "mdCircRNA-42"; gene_name "CYP39A1"; gene_biotype "protein_coding"; transcript_biotype "circRNA"; oId "lv:circCYP39A1-704-003"; tissue "lv";
2	ncSplice	exon	292507283	292507371	.	-	.	gene_id "ENSMODG00000018894"; transcript_id "mdCircRNA-42"; exon_number "1" gene_name "CYP39A1"; gene_biotype "protein_coding"; oId "lv:circCYP39A1-704-003"; tissue "lv";
2	ncSplice	exon	292508264	292508359	.	-	.	gene_id "ENSMODG00000018894"; transcript_id "mdCircRNA-42"; exon_number "2" gene_name "CYP39A1"; gene_biotype "protein_coding"; oId "lv:circCYP39A1-704-003"; tissue "lv";
2	ncSplice	exon	292520612	292520745	.	-	.	gene_id "ENSMODG00000018894"; transcript_id "mdCircRNA-42"; exon_number "3" gene_name "CYP39A1"; gene_biotype "protein_coding"; oId "lv:circCYP39A1-704-003"; tissue "lv";
2	ncSplice	exon	292548630	292548720	.	-	.	gene_id "ENSMODG00000018894"; transcript_id "mdCircRNA-42"; exon_number "4" gene_name "CYP39A1"; gene_biotype "protein_coding"; oId "lv:circCYP39A1-704-003"; tissue "lv";
2	ncSplice	exon	292553018	292553125	.	-	.	gene_id "ENSMODG00000018894"; transcript_id "mdCircRNA-42"; exon_number "5" gene_name "CYP39A1"; gene_biotype "protein_coding"; oId "lv:circCYP39A1-704-003"; tissue "lv";
2	ncSplice	exon	292553455	292553548	.	-	.	gene_id "ENSMODG00000018894"; transcript_id "mdCircRNA-42"; exon_number "6" gene_name "CYP39A1"; gene_biotype "protein_coding"; oId "lv:circCYP39A1-704-003"; tissue "lv";
2	ncSplice	gene	292548630	292566192	.	-	.	gene_id "ENSMODG00000018894"; gene_name "CYP39A1"; gene_source "ncSplice"; gene_biotype "protein_coding";
2	ncSplice	transcript	292548630	292566192	.	-	.	gene_id "ENSMODG00000018894"; transcript_id "mdCircRNA-43"; gene_name "CYP39A1"; gene_biotype "protein_coding"; transcript_biotype "circRNA"; oId "lv:circCYP39A1-710-017"; tissue "lv";
2	ncSplice	exon	292548630	292548720	.	-	.	gene_id "ENSMODG00000018894"; transcript_id "mdCircRNA-43"; exon_number "1" gene_name "CYP39A1"; gene_biotype "protein_coding"; oId "lv:circCYP39A1-710-017"; tissue "lv";
2	ncSplice	exon	292553018	292553125	.	-	.	gene_id "ENSMODG00000018894"; transcript_id "mdCircRNA-43"; exon_number "2" gene_name "CYP39A1"; gene_biotype "protein_coding"; oId "lv:circCYP39A1-710-017"; tissue "lv";
2	ncSplice	exon	292553455	292553548	.	-	.	gene_id "ENSMODG00000018894"; transcript_id "mdCircRNA-43"; exon_number "3" gene_name "CYP39A1"; gene_biotype "protein_coding"; oId "lv:circCYP39A1-710-017"; tissue "lv";
2	ncSplice	exon	292559696	292559845	.	-	.	gene_id "ENSMODG00000018894"; transcript_id "mdCircRNA-43"; exon_number "4" gene_name "CYP39A1"; gene_biotype "protein_coding"; oId "lv:circCYP39A1-710-017"; tissue "lv";
2	ncSplice	exon	292566018	292566192	.	-	.	gene_id "ENSMODG00000018894"; transcript_id "mdCircRNA-43"; exon_number "5" gene_name "CYP39A1"; gene_biotype "protein_coding"; oId "lv:circCYP39A1-710-017"; tissue "lv";
2	ncSplice	gene	292548630	292572347	.	-	.	gene_id "ENSMODG00000018894"; gene_name "CYP39A1"; gene_source "ncSplice"; gene_biotype "protein_coding";
2	ncSplice	transcript	292548630	292572347	.	-	.	gene_id "ENSMODG00000018894"; transcript_id "mdCircRNA-44"; gene_name "CYP39A1"; gene_biotype "protein_coding"; transcript_biotype "circRNA"; oId "lv:circCYP39A1-711-029"; tissue "lv";
2	ncSplice	exon	292548630	292548720	.	-	.	gene_id "ENSMODG00000018894"; transcript_id "mdCircRNA-44"; exon_number "1" gene_name "CYP39A1"; gene_biotype "protein_coding"; oId "lv:circCYP39A1-711-029"; tissue "lv";
2	ncSplice	exon	292553018	292553125	.	-	.	gene_id "ENSMODG00000018894"; transcript_id "mdCircRNA-44"; exon_number "2" gene_name "CYP39A1"; gene_biotype "protein_coding"; oId "lv:circCYP39A1-711-029"; tissue "lv";
2	ncSplice	exon	292553455	292553548	.	-	.	gene_id "ENSMODG00000018894"; transcript_id "mdCircRNA-44"; exon_number "3" gene_name "CYP39A1"; gene_biotype "protein_coding"; oId "lv:circCYP39A1-711-029"; tissue "lv";
2	ncSplice	exon	292559696	292559845	.	-	.	gene_id "ENSMODG00000018894"; transcript_id "mdCircRNA-44"; exon_number "4" gene_name "CYP39A1"; gene_biotype "protein_coding"; oId "lv:circCYP39A1-711-029"; tissue "lv";
2	ncSplice	exon	292572212	292572347	.	-	.	gene_id "ENSMODG00000018894"; transcript_id "mdCircRNA-44"; exon_number "5" gene_name "CYP39A1"; gene_biotype "protein_coding"; oId "lv:circCYP39A1-711-029"; tissue "lv";
2	ncSplice	gene	442837664	442908817	.	+	.	gene_id "ENSMODG00000006771"; gene_name "SLC22A3"; gene_source "ncSplice"; gene_biotype "protein_coding";
2	ncSplice	transcript	442837664	442908817	.	+	.	gene_id "ENSMODG00000006771"; transcript_id "mdCircRNA-45"; gene_name "SLC22A3"; gene_biotype "protein_coding"; transcript_biotype "circRNA"; oId "lv:circSLC22A3-794-001"; tissue "lv";
2	ncSplice	exon	442837664	442837916	.	+	.	gene_id "ENSMODG00000006771"; transcript_id "mdCircRNA-45"; exon_number "1" gene_name "SLC22A3"; gene_biotype "protein_coding"; oId "lv:circSLC22A3-794-001"; tissue "lv";
2	ncSplice	exon	442900678	442900781	.	+	.	gene_id "ENSMODG00000006771"; transcript_id "mdCircRNA-45"; exon_number "2" gene_name "SLC22A3"; gene_biotype "protein_coding"; oId "lv:circSLC22A3-794-001"; tissue "lv";
2	ncSplice	exon	442905595	442905749	.	+	.	gene_id "ENSMODG00000006771"; transcript_id "mdCircRNA-45"; exon_number "3" gene_name "SLC22A3"; gene_biotype "protein_coding"; oId "lv:circSLC22A3-794-001"; tissue "lv";
2	ncSplice	exon	442907652	442907820	.	+	.	gene_id "ENSMODG00000006771"; transcript_id "mdCircRNA-45"; exon_number "4" gene_name "SLC22A3"; gene_biotype "protein_coding"; oId "lv:circSLC22A3-794-001"; tissue "lv";
2	ncSplice	exon	442908700	442908817	.	+	.	gene_id "ENSMODG00000006771"; transcript_id "mdCircRNA-45"; exon_number "5" gene_name "SLC22A3"; gene_biotype "protein_coding"; oId "lv:circSLC22A3-794-001"; tissue "lv";
2	ncSplice	gene	496635894	496637024	.	-	.	gene_id "ENSMODG00000018875"; gene_name "POGZ"; gene_source "ncSplice"; gene_biotype "protein_coding";
2	ncSplice	transcript	496635894	496637024	.	-	.	gene_id "ENSMODG00000018875"; transcript_id "mdCircRNA-46"; gene_name "POGZ"; gene_biotype "protein_coding"; transcript_biotype "circRNA"; oId "lv:circPOGZ-827-002|ce:circPOGZ-1328-001|ts:circPOGZ-3319-001"; tissue "lv|ce|ts";
2	ncSplice	exon	496635894	496636052	.	-	.	gene_id "ENSMODG00000018875"; transcript_id "mdCircRNA-46"; exon_number "1" gene_name "POGZ"; gene_biotype "protein_coding"; oId "lv:circPOGZ-827-002|ce:circPOGZ-1328-001|ts:circPOGZ-3319-001"; tissue "lv|ce|ts";
2	ncSplice	exon	496636900	496637024	.	-	.	gene_id "ENSMODG00000018875"; transcript_id "mdCircRNA-46"; exon_number "2" gene_name "POGZ"; gene_biotype "protein_coding"; oId "lv:circPOGZ-827-002|ce:circPOGZ-1328-001|ts:circPOGZ-3319-001"; tissue "lv|ce|ts";
2	ncSplice	gene	529971293	529979017	.	-	.	gene_id "ENSMODG00000013761"; gene_name "BAZ1B"; gene_source "ncSplice"; gene_biotype "protein_coding";
2	ncSplice	transcript	529971293	529979017	.	-	.	gene_id "ENSMODG00000013761"; transcript_id "mdCircRNA-47"; gene_name "BAZ1B"; gene_biotype "protein_coding"; transcript_biotype "circRNA"; oId "lv:circBAZ1B-857-001|ce:circBAZ1B-1367-001|ts:circBAZ1B-3403-001"; tissue "lv|ce|ts";
2	ncSplice	exon	529971293	529971490	.	-	.	gene_id "ENSMODG00000013761"; transcript_id "mdCircRNA-47"; exon_number "1" gene_name "BAZ1B"; gene_biotype "protein_coding"; oId "lv:circBAZ1B-857-001|ce:circBAZ1B-1367-001|ts:circBAZ1B-3403-001"; tissue "lv|ce|ts";
2	ncSplice	exon	529976162	529976283	.	-	.	gene_id "ENSMODG00000013761"; transcript_id "mdCircRNA-47"; exon_number "2" gene_name "BAZ1B"; gene_biotype "protein_coding"; oId "lv:circBAZ1B-857-001|ce:circBAZ1B-1367-001|ts:circBAZ1B-3403-001"; tissue "lv|ce|ts";
2	ncSplice	exon	529978391	529978592	.	-	.	gene_id "ENSMODG00000013761"; transcript_id "mdCircRNA-47"; exon_number "3" gene_name "BAZ1B"; gene_biotype "protein_coding"; oId "lv:circBAZ1B-857-001|ce:circBAZ1B-1367-001|ts:circBAZ1B-3403-001"; tissue "lv|ce|ts";
2	ncSplice	exon	529978873	529979017	.	-	.	gene_id "ENSMODG00000013761"; transcript_id "mdCircRNA-47"; exon_number "4" gene_name "BAZ1B"; gene_biotype "protein_coding"; oId "lv:circBAZ1B-857-001|ce:circBAZ1B-1367-001|ts:circBAZ1B-3403-001"; tissue "lv|ce|ts";
2	ncSplice	gene	63393835	63394761	.	+	.	gene_id "ENSMODG00000003637"; gene_name "FMO3"; gene_source "ncSplice"; gene_biotype "protein_coding";
2	ncSplice	transcript	63393835	63394761	.	+	.	gene_id "ENSMODG00000003637"; transcript_id "mdCircRNA-48"; gene_name "FMO3"; gene_biotype "protein_coding"; transcript_biotype "circRNA"; oId "lv:circFMO3-862-001"; tissue "lv";
2	ncSplice	exon	63393835	63393997	.	+	.	gene_id "ENSMODG00000003637"; transcript_id "mdCircRNA-48"; exon_number "1" gene_name "FMO3"; gene_biotype "protein_coding"; oId "lv:circFMO3-862-001"; tissue "lv";
2	ncSplice	exon	63394619	63394761	.	+	.	gene_id "ENSMODG00000003637"; transcript_id "mdCircRNA-48"; exon_number "2" gene_name "FMO3"; gene_biotype "protein_coding"; oId "lv:circFMO3-862-001"; tissue "lv";
3	ncSplice	gene	112715227	112720480	.	+	.	gene_id "ENSMODG00000002941"; gene_name "OTULIN"; gene_source "ncSplice"; gene_biotype "protein_coding";
3	ncSplice	transcript	112715227	112720480	.	+	.	gene_id "ENSMODG00000002941"; transcript_id "mdCircRNA-49"; gene_name "OTULIN"; gene_biotype "protein_coding"; transcript_biotype "circRNA"; oId "lv:circOTULIN-881-001|ts:circOTULIN-3563-001"; tissue "lv|ts";
3	ncSplice	exon	112715227	112715303	.	+	.	gene_id "ENSMODG00000002941"; transcript_id "mdCircRNA-49"; exon_number "1" gene_name "OTULIN"; gene_biotype "protein_coding"; oId "lv:circOTULIN-881-001|ts:circOTULIN-3563-001"; tissue "lv|ts";
3	ncSplice	exon	112717542	112717636	.	+	.	gene_id "ENSMODG00000002941"; transcript_id "mdCircRNA-49"; exon_number "2" gene_name "OTULIN"; gene_biotype "protein_coding"; oId "lv:circOTULIN-881-001|ts:circOTULIN-3563-001"; tissue "lv|ts";
3	ncSplice	exon	112720337	112720480	.	+	.	gene_id "ENSMODG00000002941"; transcript_id "mdCircRNA-49"; exon_number "3" gene_name "OTULIN"; gene_biotype "protein_coding"; oId "lv:circOTULIN-881-001|ts:circOTULIN-3563-001"; tissue "lv|ts";
3	ncSplice	gene	240163728	240174935	.	+	.	gene_id "ENSMODG00000020357"; gene_name "NADK2"; gene_source "ncSplice"; gene_biotype "protein_coding";
3	ncSplice	transcript	240163728	240174935	.	+	.	gene_id "ENSMODG00000020357"; transcript_id "mdCircRNA-50"; gene_name "NADK2"; gene_biotype "protein_coding"; transcript_biotype "circRNA"; oId "lv:circNADK2-940-002|ts:circNADK2-3797-001"; tissue "lv|ts";
3	ncSplice	exon	240163728	240163816	.	+	.	gene_id "ENSMODG00000020357"; transcript_id "mdCircRNA-50"; exon_number "1" gene_name "NADK2"; gene_biotype "protein_coding"; oId "lv:circNADK2-940-002|ts:circNADK2-3797-001"; tissue "lv|ts";
3	ncSplice	exon	240165002	240165090	.	+	.	gene_id "ENSMODG00000020357"; transcript_id "mdCircRNA-50"; exon_number "2" gene_name "NADK2"; gene_biotype "protein_coding"; oId "lv:circNADK2-940-002|ts:circNADK2-3797-001"; tissue "lv|ts";
3	ncSplice	exon	240166657	240166738	.	+	.	gene_id "ENSMODG00000020357"; transcript_id "mdCircRNA-50"; exon_number "3" gene_name "NADK2"; gene_biotype "protein_coding"; oId "lv:circNADK2-940-002|ts:circNADK2-3797-001"; tissue "lv|ts";
3	ncSplice	exon	240173203	240173286	.	+	.	gene_id "ENSMODG00000020357"; transcript_id "mdCircRNA-50"; exon_number "4" gene_name "NADK2"; gene_biotype "protein_coding"; oId "lv:circNADK2-940-002|ts:circNADK2-3797-001"; tissue "lv|ts";
3	ncSplice	exon	240174799	240174935	.	+	.	gene_id "ENSMODG00000020357"; transcript_id "mdCircRNA-50"; exon_number "5" gene_name "NADK2"; gene_biotype "protein_coding"; oId "lv:circNADK2-940-002|ts:circNADK2-3797-001"; tissue "lv|ts";
3	ncSplice	gene	240163728	240185815	.	+	.	gene_id "ENSMODG00000020357"; gene_name "NADK2"; gene_source "ncSplice"; gene_biotype "protein_coding";
3	ncSplice	transcript	240163728	240185815	.	+	.	gene_id "ENSMODG00000020357"; transcript_id "mdCircRNA-51"; gene_name "NADK2"; gene_biotype "protein_coding"; transcript_biotype "circRNA"; oId "lv:circNADK2-942-004"; tissue "lv";
3	ncSplice	exon	240163728	240163816	.	+	.	gene_id "ENSMODG00000020357"; transcript_id "mdCircRNA-51"; exon_number "1" gene_name "NADK2"; gene_biotype "protein_coding"; oId "lv:circNADK2-942-004"; tissue "lv";
3	ncSplice	exon	240165002	240165090	.	+	.	gene_id "ENSMODG00000020357"; transcript_id "mdCircRNA-51"; exon_number "2" gene_name "NADK2"; gene_biotype "protein_coding"; oId "lv:circNADK2-942-004"; tissue "lv";
3	ncSplice	exon	240166657	240166738	.	+	.	gene_id "ENSMODG00000020357"; transcript_id "mdCircRNA-51"; exon_number "3" gene_name "NADK2"; gene_biotype "protein_coding"; oId "lv:circNADK2-942-004"; tissue "lv";
3	ncSplice	exon	240173203	240173286	.	+	.	gene_id "ENSMODG00000020357"; transcript_id "mdCircRNA-51"; exon_number "4" gene_name "NADK2"; gene_biotype "protein_coding"; oId "lv:circNADK2-942-004"; tissue "lv";
3	ncSplice	exon	240174799	240174935	.	+	.	gene_id "ENSMODG00000020357"; transcript_id "mdCircRNA-51"; exon_number "5" gene_name "NADK2"; gene_biotype "protein_coding"; oId "lv:circNADK2-942-004"; tissue "lv";
3	ncSplice	exon	240182535	240182613	.	+	.	gene_id "ENSMODG00000020357"; transcript_id "mdCircRNA-51"; exon_number "6" gene_name "NADK2"; gene_biotype "protein_coding"; oId "lv:circNADK2-942-004"; tissue "lv";
3	ncSplice	exon	240185720	240185815	.	+	.	gene_id "ENSMODG00000020357"; transcript_id "mdCircRNA-51"; exon_number "7" gene_name "NADK2"; gene_biotype "protein_coding"; oId "lv:circNADK2-942-004"; tissue "lv";
3	ncSplice	gene	327686077	327707182	.	+	.	gene_id "ENSMODG00000010656"; gene_name "RANBP9"; gene_source "ncSplice"; gene_biotype "protein_coding";
3	ncSplice	transcript	327686077	327707182	.	+	.	gene_id "ENSMODG00000010656"; transcript_id "mdCircRNA-52"; gene_name "RANBP9"; gene_biotype "protein_coding"; transcript_biotype "circRNA"; oId "lv:circRANBP9-1000-004"; tissue "lv";
3	ncSplice	exon	327686077	327686129	.	+	.	gene_id "ENSMODG00000010656"; transcript_id "mdCircRNA-52"; exon_number "1" gene_name "RANBP9"; gene_biotype "protein_coding"; oId "lv:circRANBP9-1000-004"; tissue "lv";
3	ncSplice	exon	327687417	327687584	.	+	.	gene_id "ENSMODG00000010656"; transcript_id "mdCircRNA-52"; exon_number "2" gene_name "RANBP9"; gene_biotype "protein_coding"; oId "lv:circRANBP9-1000-004"; tissue "lv";
3	ncSplice	exon	327691671	327691693	.	+	.	gene_id "ENSMODG00000010656"; transcript_id "mdCircRNA-52"; exon_number "3" gene_name "RANBP9"; gene_biotype "protein_coding"; oId "lv:circRANBP9-1000-004"; tissue "lv";
3	ncSplice	exon	327695552	327695736	.	+	.	gene_id "ENSMODG00000010656"; transcript_id "mdCircRNA-52"; exon_number "4" gene_name "RANBP9"; gene_biotype "protein_coding"; oId "lv:circRANBP9-1000-004"; tissue "lv";
3	ncSplice	exon	327699776	327699888	.	+	.	gene_id "ENSMODG00000010656"; transcript_id "mdCircRNA-52"; exon_number "5" gene_name "RANBP9"; gene_biotype "protein_coding"; oId "lv:circRANBP9-1000-004"; tissue "lv";
3	ncSplice	exon	327701124	327701232	.	+	.	gene_id "ENSMODG00000010656"; transcript_id "mdCircRNA-52"; exon_number "6" gene_name "RANBP9"; gene_biotype "protein_coding"; oId "lv:circRANBP9-1000-004"; tissue "lv";
3	ncSplice	exon	327701963	327702153	.	+	.	gene_id "ENSMODG00000010656"; transcript_id "mdCircRNA-52"; exon_number "7" gene_name "RANBP9"; gene_biotype "protein_coding"; oId "lv:circRANBP9-1000-004"; tissue "lv";
3	ncSplice	exon	327703601	327703745	.	+	.	gene_id "ENSMODG00000010656"; transcript_id "mdCircRNA-52"; exon_number "8" gene_name "RANBP9"; gene_biotype "protein_coding"; oId "lv:circRANBP9-1000-004"; tissue "lv";
3	ncSplice	exon	327705203	327705324	.	+	.	gene_id "ENSMODG00000010656"; transcript_id "mdCircRNA-52"; exon_number "9" gene_name "RANBP9"; gene_biotype "protein_coding"; oId "lv:circRANBP9-1000-004"; tissue "lv";
3	ncSplice	exon	327707031	327707182	.	+	.	gene_id "ENSMODG00000010656"; transcript_id "mdCircRNA-52"; exon_number "10" gene_name "RANBP9"; gene_biotype "protein_coding"; oId "lv:circRANBP9-1000-004"; tissue "lv";
3	ncSplice	gene	337407521	337418403	.	-	.	gene_id "ENSMODG00000009892"; gene_name "RREB1"; gene_source "ncSplice"; gene_biotype "protein_coding";
3	ncSplice	transcript	337407521	337418403	.	-	.	gene_id "ENSMODG00000009892"; transcript_id "mdCircRNA-53"; gene_name "RREB1"; gene_biotype "protein_coding"; transcript_biotype "circRNA"; oId "lv:circRREB1-1009-001"; tissue "lv";
3	ncSplice	exon	337407521	337407684	.	-	.	gene_id "ENSMODG00000009892"; transcript_id "mdCircRNA-53"; exon_number "1" gene_name "RREB1"; gene_biotype "protein_coding"; oId "lv:circRREB1-1009-001"; tissue "lv";
3	ncSplice	exon	337408708	337408797	.	-	.	gene_id "ENSMODG00000009892"; transcript_id "mdCircRNA-53"; exon_number "2" gene_name "RREB1"; gene_biotype "protein_coding"; oId "lv:circRREB1-1009-001"; tissue "lv";
3	ncSplice	exon	337413474	337413682	.	-	.	gene_id "ENSMODG00000009892"; transcript_id "mdCircRNA-53"; exon_number "3" gene_name "RREB1"; gene_biotype "protein_coding"; oId "lv:circRREB1-1009-001"; tissue "lv";
3	ncSplice	exon	337413973	337414080	.	-	.	gene_id "ENSMODG00000009892"; transcript_id "mdCircRNA-53"; exon_number "4" gene_name "RREB1"; gene_biotype "protein_coding"; oId "lv:circRREB1-1009-001"; tissue "lv";
3	ncSplice	exon	337418268	337418403	.	-	.	gene_id "ENSMODG00000009892"; transcript_id "mdCircRNA-53"; exon_number "5" gene_name "RREB1"; gene_biotype "protein_coding"; oId "lv:circRREB1-1009-001"; tissue "lv";
3	ncSplice	gene	340570622	340571725	.	-	.	gene_id "ENSMODG00000009804"; gene_name "NA"; gene_source "ncSplice"; gene_biotype "protein_coding";
3	ncSplice	transcript	340570622	340571725	.	-	.	gene_id "ENSMODG00000009804"; transcript_id "mdCircRNA-54"; gene_name "NA"; gene_biotype "protein_coding"; transcript_biotype "circRNA"; oId "lv:circNA-1010-001|ce:circNA-1630-001|ts:circNA-4072-001"; tissue "lv|ce|ts";
3	ncSplice	exon	340570622	340571288	.	-	.	gene_id "ENSMODG00000009804"; transcript_id "mdCircRNA-54"; exon_number "1" gene_name "NA"; gene_biotype "protein_coding"; oId "lv:circNA-1010-001|ce:circNA-1630-001|ts:circNA-4072-001"; tissue "lv|ce|ts";
3	ncSplice	exon	340571663	340571725	.	-	.	gene_id "ENSMODG00000009804"; transcript_id "mdCircRNA-54"; exon_number "2" gene_name "NA"; gene_biotype "protein_coding"; oId "lv:circNA-1010-001|ce:circNA-1630-001|ts:circNA-4072-001"; tissue "lv|ce|ts";
3	ncSplice	gene	36394775	36425304	.	-	.	gene_id "ENSMODG00000019716"; gene_name "PAPD4"; gene_source "ncSplice"; gene_biotype "protein_coding";
3	ncSplice	transcript	36394775	36425304	.	-	.	gene_id "ENSMODG00000019716"; transcript_id "mdCircRNA-55"; gene_name "PAPD4"; gene_biotype "protein_coding"; transcript_biotype "circRNA"; oId "lv:circPAPD4-1031-002"; tissue "lv";
3	ncSplice	exon	36394775	36394921	.	-	.	gene_id "ENSMODG00000019716"; transcript_id "mdCircRNA-55"; exon_number "1" gene_name "PAPD4"; gene_biotype "protein_coding"; oId "lv:circPAPD4-1031-002"; tissue "lv";
3	ncSplice	exon	36395343	36395419	.	-	.	gene_id "ENSMODG00000019716"; transcript_id "mdCircRNA-55"; exon_number "2" gene_name "PAPD4"; gene_biotype "protein_coding"; oId "lv:circPAPD4-1031-002"; tissue "lv";
3	ncSplice	exon	36399738	36399807	.	-	.	gene_id "ENSMODG00000019716"; transcript_id "mdCircRNA-55"; exon_number "3" gene_name "PAPD4"; gene_biotype "protein_coding"; oId "lv:circPAPD4-1031-002"; tissue "lv";
3	ncSplice	exon	36407797	36407863	.	-	.	gene_id "ENSMODG00000019716"; transcript_id "mdCircRNA-55"; exon_number "4" gene_name "PAPD4"; gene_biotype "protein_coding"; oId "lv:circPAPD4-1031-002"; tissue "lv";
3	ncSplice	exon	36410505	36410596	.	-	.	gene_id "ENSMODG00000019716"; transcript_id "mdCircRNA-55"; exon_number "5" gene_name "PAPD4"; gene_biotype "protein_coding"; oId "lv:circPAPD4-1031-002"; tissue "lv";
3	ncSplice	exon	36410705	36410819	.	-	.	gene_id "ENSMODG00000019716"; transcript_id "mdCircRNA-55"; exon_number "6" gene_name "PAPD4"; gene_biotype "protein_coding"; oId "lv:circPAPD4-1031-002"; tissue "lv";
3	ncSplice	exon	36421649	36421901	.	-	.	gene_id "ENSMODG00000019716"; transcript_id "mdCircRNA-55"; exon_number "7" gene_name "PAPD4"; gene_biotype "protein_coding"; oId "lv:circPAPD4-1031-002"; tissue "lv";
3	ncSplice	exon	36424147	36424266	.	-	.	gene_id "ENSMODG00000019716"; transcript_id "mdCircRNA-55"; exon_number "8" gene_name "PAPD4"; gene_biotype "protein_coding"; oId "lv:circPAPD4-1031-002"; tissue "lv";
3	ncSplice	exon	36425119	36425304	.	-	.	gene_id "ENSMODG00000019716"; transcript_id "mdCircRNA-55"; exon_number "9" gene_name "PAPD4"; gene_biotype "protein_coding"; oId "lv:circPAPD4-1031-002"; tissue "lv";
3	ncSplice	gene	374140460	374143078	.	+	.	gene_id "ENSMODG00000005343"; gene_name "OXR1"; gene_source "ncSplice"; gene_biotype "protein_coding";
3	ncSplice	transcript	374140460	374143078	.	+	.	gene_id "ENSMODG00000005343"; transcript_id "mdCircRNA-56"; gene_name "OXR1"; gene_biotype "protein_coding"; transcript_biotype "circRNA"; oId "lv:circOXR1-1040-001|ts:circOXR1-4185-001"; tissue "lv|ts";
3	ncSplice	exon	374140460	374140542	.	+	.	gene_id "ENSMODG00000005343"; transcript_id "mdCircRNA-56"; exon_number "1" gene_name "OXR1"; gene_biotype "protein_coding"; oId "lv:circOXR1-1040-001|ts:circOXR1-4185-001"; tissue "lv|ts";
3	ncSplice	exon	374142216	374142323	.	+	.	gene_id "ENSMODG00000005343"; transcript_id "mdCircRNA-56"; exon_number "2" gene_name "OXR1"; gene_biotype "protein_coding"; oId "lv:circOXR1-1040-001|ts:circOXR1-4185-001"; tissue "lv|ts";
3	ncSplice	exon	374142965	374143078	.	+	.	gene_id "ENSMODG00000005343"; transcript_id "mdCircRNA-56"; exon_number "3" gene_name "OXR1"; gene_biotype "protein_coding"; oId "lv:circOXR1-1040-001|ts:circOXR1-4185-001"; tissue "lv|ts";
3	ncSplice	gene	47141288	47152195	.	+	.	gene_id "ENSMODG00000001742"; gene_name "FCHO2"; gene_source "ncSplice"; gene_biotype "protein_coding";
3	ncSplice	transcript	47141288	47152195	.	+	.	gene_id "ENSMODG00000001742"; transcript_id "mdCircRNA-57"; gene_name "FCHO2"; gene_biotype "protein_coding"; transcript_biotype "circRNA"; oId "lv:circFCHO2-1101-002|ce:circFCHO2-1791-001|ts:circFCHO2-4520-001"; tissue "lv|ce|ts";
3	ncSplice	exon	47141288	47141379	.	+	.	gene_id "ENSMODG00000001742"; transcript_id "mdCircRNA-57"; exon_number "1" gene_name "FCHO2"; gene_biotype "protein_coding"; oId "lv:circFCHO2-1101-002|ce:circFCHO2-1791-001|ts:circFCHO2-4520-001"; tissue "lv|ce|ts";
3	ncSplice	exon	47147587	47147661	.	+	.	gene_id "ENSMODG00000001742"; transcript_id "mdCircRNA-57"; exon_number "2" gene_name "FCHO2"; gene_biotype "protein_coding"; oId "lv:circFCHO2-1101-002|ce:circFCHO2-1791-001|ts:circFCHO2-4520-001"; tissue "lv|ce|ts";
3	ncSplice	exon	47151812	47151953	.	+	.	gene_id "ENSMODG00000001742"; transcript_id "mdCircRNA-57"; exon_number "3" gene_name "FCHO2"; gene_biotype "protein_coding"; oId "lv:circFCHO2-1101-002|ce:circFCHO2-1791-001|ts:circFCHO2-4520-001"; tissue "lv|ce|ts";
3	ncSplice	exon	47152043	47152195	.	+	.	gene_id "ENSMODG00000001742"; transcript_id "mdCircRNA-57"; exon_number "4" gene_name "FCHO2"; gene_biotype "protein_coding"; oId "lv:circFCHO2-1101-002|ce:circFCHO2-1791-001|ts:circFCHO2-4520-001"; tissue "lv|ce|ts";
3	ncSplice	gene	478213209	478226416	.	+	.	gene_id "ENSMODG00000014425"; gene_name "NA"; gene_source "ncSplice"; gene_biotype "protein_coding";
3	ncSplice	transcript	478213209	478226416	.	+	.	gene_id "ENSMODG00000014425"; transcript_id "mdCircRNA-58"; gene_name "NA"; gene_biotype "protein_coding"; transcript_biotype "circRNA"; oId "lv:circNA-1109-001"; tissue "lv";
3	ncSplice	exon	478213209	478213807	.	+	.	gene_id "ENSMODG00000014425"; transcript_id "mdCircRNA-58"; exon_number "1" gene_name "NA"; gene_biotype "protein_coding"; oId "lv:circNA-1109-001"; tissue "lv";
3	ncSplice	exon	478226123	478226416	.	+	.	gene_id "ENSMODG00000014425"; transcript_id "mdCircRNA-58"; exon_number "2" gene_name "NA"; gene_biotype "protein_coding"; oId "lv:circNA-1109-001"; tissue "lv";
3	ncSplice	gene	525527200	525532556	.	+	.	gene_id "3:525527199:525532556:1"; gene_name "3:525527199:525532556:1"; gene_source "ncSplice"; gene_biotype "novel";
3	ncSplice	transcript	525527200	525532556	.	+	.	gene_id "3:525527199:525532556:1"; transcript_id "mdCircRNA-59"; gene_name "3:525527199:525532556:1"; gene_biotype "novel"; transcript_biotype "circRNA"; oId "lv:circ3:525527199:525532556:1-1143-010"; tissue "lv";
3	ncSplice	exon	525527200	525527326	.	+	.	gene_id "3:525527199:525532556:1"; transcript_id "mdCircRNA-59"; exon_number "1" gene_name "3:525527199:525532556:1"; gene_biotype "novel"; oId "lv:circ3:525527199:525532556:1-1143-010"; tissue "lv";
3	ncSplice	exon	525528149	525528243	.	+	.	gene_id "3:525527199:525532556:1"; transcript_id "mdCircRNA-59"; exon_number "2" gene_name "3:525527199:525532556:1"; gene_biotype "novel"; oId "lv:circ3:525527199:525532556:1-1143-010"; tissue "lv";
3	ncSplice	exon	525528566	525528658	.	+	.	gene_id "3:525527199:525532556:1"; transcript_id "mdCircRNA-59"; exon_number "3" gene_name "3:525527199:525532556:1"; gene_biotype "novel"; oId "lv:circ3:525527199:525532556:1-1143-010"; tissue "lv";
3	ncSplice	exon	525532459	525532556	.	+	.	gene_id "3:525527199:525532556:1"; transcript_id "mdCircRNA-59"; exon_number "4" gene_name "3:525527199:525532556:1"; gene_biotype "novel"; oId "lv:circ3:525527199:525532556:1-1143-010"; tissue "lv";
4	ncSplice	gene	110178374	110183527	.	+	.	gene_id "ENSMODG00000018659"; gene_name "WDR33"; gene_source "ncSplice"; gene_biotype "protein_coding";
4	ncSplice	transcript	110178374	110183527	.	+	.	gene_id "ENSMODG00000018659"; transcript_id "mdCircRNA-60"; gene_name "WDR33"; gene_biotype "protein_coding"; transcript_biotype "circRNA"; oId "lv:circWDR33-1172-001"; tissue "lv";
4	ncSplice	exon	110178374	110178442	.	+	.	gene_id "ENSMODG00000018659"; transcript_id "mdCircRNA-60"; exon_number "1" gene_name "WDR33"; gene_biotype "protein_coding"; oId "lv:circWDR33-1172-001"; tissue "lv";
4	ncSplice	exon	110179171	110179275	.	+	.	gene_id "ENSMODG00000018659"; transcript_id "mdCircRNA-60"; exon_number "2" gene_name "WDR33"; gene_biotype "protein_coding"; oId "lv:circWDR33-1172-001"; tissue "lv";
4	ncSplice	exon	110181227	110181322	.	+	.	gene_id "ENSMODG00000018659"; transcript_id "mdCircRNA-60"; exon_number "3" gene_name "WDR33"; gene_biotype "protein_coding"; oId "lv:circWDR33-1172-001"; tissue "lv";
4	ncSplice	exon	110181522	110181673	.	+	.	gene_id "ENSMODG00000018659"; transcript_id "mdCircRNA-60"; exon_number "4" gene_name "WDR33"; gene_biotype "protein_coding"; oId "lv:circWDR33-1172-001"; tissue "lv";
4	ncSplice	exon	110183430	110183527	.	+	.	gene_id "ENSMODG00000018659"; transcript_id "mdCircRNA-60"; exon_number "5" gene_name "WDR33"; gene_biotype "protein_coding"; oId "lv:circWDR33-1172-001"; tissue "lv";
4	ncSplice	gene	294215403	294218166	.	-	.	gene_id "4:294215402:294218166:-1"; gene_name "4:294215402:294218166:-1"; gene_source "ncSplice"; gene_biotype "novel";
4	ncSplice	transcript	294215403	294218166	.	-	.	gene_id "4:294215402:294218166:-1"; transcript_id "mdCircRNA-61"; gene_name "4:294215402:294218166:-1"; gene_biotype "novel"; transcript_biotype "circRNA"; oId "lv:circ4:294215402:294218166:-1-1246-001"; tissue "lv";
4	ncSplice	exon	294215403	294215547	.	-	.	gene_id "4:294215402:294218166:-1"; transcript_id "mdCircRNA-61"; exon_number "1" gene_name "4:294215402:294218166:-1"; gene_biotype "novel"; oId "lv:circ4:294215402:294218166:-1-1246-001"; tissue "lv";
4	ncSplice	exon	294217801	294218166	.	-	.	gene_id "4:294215402:294218166:-1"; transcript_id "mdCircRNA-61"; exon_number "2" gene_name "4:294215402:294218166:-1"; gene_biotype "novel"; oId "lv:circ4:294215402:294218166:-1-1246-001"; tissue "lv";
4	ncSplice	gene	304539304	304552634	.	+	.	gene_id "ENSMODG00000009630"; gene_name "PDS5B"; gene_source "ncSplice"; gene_biotype "protein_coding";
4	ncSplice	transcript	304539304	304552634	.	+	.	gene_id "ENSMODG00000009630"; transcript_id "mdCircRNA-62"; gene_name "PDS5B"; gene_biotype "protein_coding"; transcript_biotype "circRNA"; oId "lv:circPDS5B-1252-001|ce:circPDS5B-2138-001|ts:circPDS5B-5305-001"; tissue "lv|ce|ts";
4	ncSplice	exon	304539304	304539409	.	+	.	gene_id "ENSMODG00000009630"; transcript_id "mdCircRNA-62"; exon_number "1" gene_name "PDS5B"; gene_biotype "protein_coding"; oId "lv:circPDS5B-1252-001|ce:circPDS5B-2138-001|ts:circPDS5B-5305-001"; tissue "lv|ce|ts";
4	ncSplice	exon	304541861	304542021	.	+	.	gene_id "ENSMODG00000009630"; transcript_id "mdCircRNA-62"; exon_number "2" gene_name "PDS5B"; gene_biotype "protein_coding"; oId "lv:circPDS5B-1252-001|ce:circPDS5B-2138-001|ts:circPDS5B-5305-001"; tissue "lv|ce|ts";
4	ncSplice	exon	304546132	304546255	.	+	.	gene_id "ENSMODG00000009630"; transcript_id "mdCircRNA-62"; exon_number "3" gene_name "PDS5B"; gene_biotype "protein_coding"; oId "lv:circPDS5B-1252-001|ce:circPDS5B-2138-001|ts:circPDS5B-5305-001"; tissue "lv|ce|ts";
4	ncSplice	exon	304548070	304548228	.	+	.	gene_id "ENSMODG00000009630"; transcript_id "mdCircRNA-62"; exon_number "4" gene_name "PDS5B"; gene_biotype "protein_coding"; oId "lv:circPDS5B-1252-001|ce:circPDS5B-2138-001|ts:circPDS5B-5305-001"; tissue "lv|ce|ts";
4	ncSplice	exon	304551551	304551619	.	+	.	gene_id "ENSMODG00000009630"; transcript_id "mdCircRNA-62"; exon_number "5" gene_name "PDS5B"; gene_biotype "protein_coding"; oId "lv:circPDS5B-1252-001|ce:circPDS5B-2138-001|ts:circPDS5B-5305-001"; tissue "lv|ce|ts";
4	ncSplice	exon	304552498	304552634	.	+	.	gene_id "ENSMODG00000009630"; transcript_id "mdCircRNA-62"; exon_number "6" gene_name "PDS5B"; gene_biotype "protein_coding"; oId "lv:circPDS5B-1252-001|ce:circPDS5B-2138-001|ts:circPDS5B-5305-001"; tissue "lv|ce|ts";
4	ncSplice	gene	345532382	345538810	.	+	.	gene_id "ENSMODG00000007600"; gene_name "NA"; gene_source "ncSplice"; gene_biotype "protein_coding";
4	ncSplice	transcript	345532382	345538810	.	+	.	gene_id "ENSMODG00000007600"; transcript_id "mdCircRNA-63"; gene_name "NA"; gene_biotype "protein_coding"; transcript_biotype "circRNA"; oId "lv:circNA-1269-003|ce:circNA-2192-001|ts:circNA-5471-001"; tissue "lv|ce|ts";
4	ncSplice	exon	345532382	345532435	.	+	.	gene_id "ENSMODG00000007600"; transcript_id "mdCircRNA-63"; exon_number "1" gene_name "NA"; gene_biotype "protein_coding"; oId "lv:circNA-1269-003|ce:circNA-2192-001|ts:circNA-5471-001"; tissue "lv|ce|ts";
4	ncSplice	exon	345534162	345534267	.	+	.	gene_id "ENSMODG00000007600"; transcript_id "mdCircRNA-63"; exon_number "2" gene_name "NA"; gene_biotype "protein_coding"; oId "lv:circNA-1269-003|ce:circNA-2192-001|ts:circNA-5471-001"; tissue "lv|ce|ts";
4	ncSplice	exon	345536332	345536443	.	+	.	gene_id "ENSMODG00000007600"; transcript_id "mdCircRNA-63"; exon_number "3" gene_name "NA"; gene_biotype "protein_coding"; oId "lv:circNA-1269-003|ce:circNA-2192-001|ts:circNA-5471-001"; tissue "lv|ce|ts";
4	ncSplice	exon	345538717	345538810	.	+	.	gene_id "ENSMODG00000007600"; transcript_id "mdCircRNA-63"; exon_number "4" gene_name "NA"; gene_biotype "protein_coding"; oId "lv:circNA-1269-003|ce:circNA-2192-001|ts:circNA-5471-001"; tissue "lv|ce|ts";
4	ncSplice	gene	404959039	404985708	.	+	.	gene_id "ENSMODG00000005955"; gene_name "NA"; gene_source "ncSplice"; gene_biotype "protein_coding";
4	ncSplice	transcript	404959039	404985708	.	+	.	gene_id "ENSMODG00000005955"; transcript_id "mdCircRNA-64"; gene_name "NA"; gene_biotype "protein_coding"; transcript_biotype "circRNA"; oId "lv:circNA-1295-001"; tissue "lv";
4	ncSplice	exon	404959039	404964279	.	+	.	gene_id "ENSMODG00000005955"; transcript_id "mdCircRNA-64"; exon_number "1" gene_name "NA"; gene_biotype "protein_coding"; oId "lv:circNA-1295-001"; tissue "lv";
4	ncSplice	exon	404964838	404984891	.	+	.	gene_id "ENSMODG00000005955"; transcript_id "mdCircRNA-64"; exon_number "2" gene_name "NA"; gene_biotype "protein_coding"; oId "lv:circNA-1295-001"; tissue "lv";
4	ncSplice	exon	404985388	404985467	.	+	.	gene_id "ENSMODG00000005955"; transcript_id "mdCircRNA-64"; exon_number "3" gene_name "NA"; gene_biotype "protein_coding"; oId "lv:circNA-1295-001"; tissue "lv";
4	ncSplice	exon	404985582	404985708	.	+	.	gene_id "ENSMODG00000005955"; transcript_id "mdCircRNA-64"; exon_number "4" gene_name "NA"; gene_biotype "protein_coding"; oId "lv:circNA-1295-001"; tissue "lv";
4	ncSplice	gene	425275200	425277731	.	-	.	gene_id "ENSMODG00000017554"; gene_name "PTP4A2"; gene_source "ncSplice"; gene_biotype "protein_coding";
4	ncSplice	transcript	425275200	425277731	.	-	.	gene_id "ENSMODG00000017554"; transcript_id "mdCircRNA-65"; gene_name "PTP4A2"; gene_biotype "protein_coding"; transcript_biotype "circRNA"; oId "lv:circPTP4A2-1305-002|ce:circPTP4A2-2259-001|ts:circPTP4A2-5653-001"; tissue "lv|ce|ts";
4	ncSplice	exon	425275200	425275292	.	-	.	gene_id "ENSMODG00000017554"; transcript_id "mdCircRNA-65"; exon_number "1" gene_name "PTP4A2"; gene_biotype "protein_coding"; oId "lv:circPTP4A2-1305-002|ce:circPTP4A2-2259-001|ts:circPTP4A2-5653-001"; tissue "lv|ce|ts";
4	ncSplice	exon	425276985	425277731	.	-	.	gene_id "ENSMODG00000017554"; transcript_id "mdCircRNA-65"; exon_number "2" gene_name "PTP4A2"; gene_biotype "protein_coding"; oId "lv:circPTP4A2-1305-002|ce:circPTP4A2-2259-001|ts:circPTP4A2-5653-001"; tissue "lv|ce|ts";
4	ncSplice	gene	48187648	48197178	.	+	.	gene_id "ENSMODG00000008086"; gene_name "RPS6KA3"; gene_source "ncSplice"; gene_biotype "protein_coding";
4	ncSplice	transcript	48187648	48197178	.	+	.	gene_id "ENSMODG00000008086"; transcript_id "mdCircRNA-66"; gene_name "RPS6KA3"; gene_biotype "protein_coding"; transcript_biotype "circRNA"; oId "lv:circRPS6KA3-1320-001|ce:circRPS6KA3-2287-001"; tissue "lv|ce";
4	ncSplice	exon	48187648	48187729	.	+	.	gene_id "ENSMODG00000008086"; transcript_id "mdCircRNA-66"; exon_number "1" gene_name "RPS6KA3"; gene_biotype "protein_coding"; oId "lv:circRPS6KA3-1320-001|ce:circRPS6KA3-2287-001"; tissue "lv|ce";
4	ncSplice	exon	48194935	48195015	.	+	.	gene_id "ENSMODG00000008086"; transcript_id "mdCircRNA-66"; exon_number "2" gene_name "RPS6KA3"; gene_biotype "protein_coding"; oId "lv:circRPS6KA3-1320-001|ce:circRPS6KA3-2287-001"; tissue "lv|ce";
4	ncSplice	exon	48196404	48196483	.	+	.	gene_id "ENSMODG00000008086"; transcript_id "mdCircRNA-66"; exon_number "3" gene_name "RPS6KA3"; gene_biotype "protein_coding"; oId "lv:circRPS6KA3-1320-001|ce:circRPS6KA3-2287-001"; tissue "lv|ce";
4	ncSplice	exon	48197072	48197178	.	+	.	gene_id "ENSMODG00000008086"; transcript_id "mdCircRNA-66"; exon_number "4" gene_name "RPS6KA3"; gene_biotype "protein_coding"; oId "lv:circRPS6KA3-1320-001|ce:circRPS6KA3-2287-001"; tissue "lv|ce";
4	ncSplice	gene	5972357	5974425	.	+	.	gene_id "ENSMODG00000020996"; gene_name "LTN1"; gene_source "ncSplice"; gene_biotype "protein_coding";
4	ncSplice	transcript	5972357	5974425	.	+	.	gene_id "ENSMODG00000020996"; transcript_id "mdCircRNA-67"; gene_name "LTN1"; gene_biotype "protein_coding"; transcript_biotype "circRNA"; oId "lv:circLTN1-1324-001"; tissue "lv";
4	ncSplice	exon	5972357	5972589	.	+	.	gene_id "ENSMODG00000020996"; transcript_id "mdCircRNA-67"; exon_number "1" gene_name "LTN1"; gene_biotype "protein_coding"; oId "lv:circLTN1-1324-001"; tissue "lv";
4	ncSplice	exon	5973112	5973210	.	+	.	gene_id "ENSMODG00000020996"; transcript_id "mdCircRNA-67"; exon_number "2" gene_name "LTN1"; gene_biotype "protein_coding"; oId "lv:circLTN1-1324-001"; tissue "lv";
4	ncSplice	exon	5974195	5974425	.	+	.	gene_id "ENSMODG00000020996"; transcript_id "mdCircRNA-67"; exon_number "3" gene_name "LTN1"; gene_biotype "protein_coding"; oId "lv:circLTN1-1324-001"; tissue "lv";
4	ncSplice	gene	75631467	75655543	.	+	.	gene_id "ENSMODG00000018166"; gene_name "GRAMD1C"; gene_source "ncSplice"; gene_biotype "protein_coding";
4	ncSplice	transcript	75631467	75655543	.	+	.	gene_id "ENSMODG00000018166"; transcript_id "mdCircRNA-68"; gene_name "GRAMD1C"; gene_biotype "protein_coding"; transcript_biotype "circRNA"; oId "lv:circGRAMD1C-1356-003"; tissue "lv";
4	ncSplice	exon	75631467	75631547	.	+	.	gene_id "ENSMODG00000018166"; transcript_id "mdCircRNA-68"; exon_number "1" gene_name "GRAMD1C"; gene_biotype "protein_coding"; oId "lv:circGRAMD1C-1356-003"; tissue "lv";
4	ncSplice	exon	75639884	75640002	.	+	.	gene_id "ENSMODG00000018166"; transcript_id "mdCircRNA-68"; exon_number "2" gene_name "GRAMD1C"; gene_biotype "protein_coding"; oId "lv:circGRAMD1C-1356-003"; tissue "lv";
4	ncSplice	exon	75646132	75646264	.	+	.	gene_id "ENSMODG00000018166"; transcript_id "mdCircRNA-68"; exon_number "3" gene_name "GRAMD1C"; gene_biotype "protein_coding"; oId "lv:circGRAMD1C-1356-003"; tissue "lv";
4	ncSplice	exon	75655381	75655543	.	+	.	gene_id "ENSMODG00000018166"; transcript_id "mdCircRNA-68"; exon_number "4" gene_name "GRAMD1C"; gene_biotype "protein_coding"; oId "lv:circGRAMD1C-1356-003"; tissue "lv";
4	ncSplice	gene	75639884	75655543	.	+	.	gene_id "ENSMODG00000018166"; gene_name "GRAMD1C"; gene_source "ncSplice"; gene_biotype "protein_coding";
4	ncSplice	transcript	75639884	75655543	.	+	.	gene_id "ENSMODG00000018166"; transcript_id "mdCircRNA-69"; gene_name "GRAMD1C"; gene_biotype "protein_coding"; transcript_biotype "circRNA"; oId "lv:circGRAMD1C-1357-001|ts:circGRAMD1C-5784-001"; tissue "lv|ts";
4	ncSplice	exon	75639884	75640002	.	+	.	gene_id "ENSMODG00000018166"; transcript_id "mdCircRNA-69"; exon_number "1" gene_name "GRAMD1C"; gene_biotype "protein_coding"; oId "lv:circGRAMD1C-1357-001|ts:circGRAMD1C-5784-001"; tissue "lv|ts";
4	ncSplice	exon	75646132	75646264	.	+	.	gene_id "ENSMODG00000018166"; transcript_id "mdCircRNA-69"; exon_number "2" gene_name "GRAMD1C"; gene_biotype "protein_coding"; oId "lv:circGRAMD1C-1357-001|ts:circGRAMD1C-5784-001"; tissue "lv|ts";
4	ncSplice	exon	75655381	75655543	.	+	.	gene_id "ENSMODG00000018166"; transcript_id "mdCircRNA-69"; exon_number "3" gene_name "GRAMD1C"; gene_biotype "protein_coding"; oId "lv:circGRAMD1C-1357-001|ts:circGRAMD1C-5784-001"; tissue "lv|ts";
5	ncSplice	gene	122241172	122243095	.	+	.	gene_id "ENSMODG00000001279"; gene_name "FGG"; gene_source "ncSplice"; gene_biotype "protein_coding";
5	ncSplice	transcript	122241172	122243095	.	+	.	gene_id "ENSMODG00000001279"; transcript_id "mdCircRNA-70"; gene_name "FGG"; gene_biotype "protein_coding"; transcript_biotype "circRNA"; oId "lv:circFGG-1385-001"; tissue "lv";
5	ncSplice	exon	122241172	122241356	.	+	.	gene_id "ENSMODG00000001279"; transcript_id "mdCircRNA-70"; exon_number "1" gene_name "FGG"; gene_biotype "protein_coding"; oId "lv:circFGG-1385-001"; tissue "lv";
5	ncSplice	exon	122242823	122243095	.	+	.	gene_id "ENSMODG00000001279"; transcript_id "mdCircRNA-70"; exon_number "2" gene_name "FGG"; gene_biotype "protein_coding"; oId "lv:circFGG-1385-001"; tissue "lv";
5	ncSplice	gene	1353810	1370556	.	+	.	gene_id "ENSMODG00000012274"; gene_name "C4orf29"; gene_source "ncSplice"; gene_biotype "protein_coding";
5	ncSplice	transcript	1353810	1370556	.	+	.	gene_id "ENSMODG00000012274"; transcript_id "mdCircRNA-71"; gene_name "C4orf29"; gene_biotype "protein_coding"; transcript_biotype "circRNA"; oId "lv:circC4orf29-1394-002"; tissue "lv";
5	ncSplice	exon	1353810	1353910	.	+	.	gene_id "ENSMODG00000012274"; transcript_id "mdCircRNA-71"; exon_number "1" gene_name "C4orf29"; gene_biotype "protein_coding"; oId "lv:circC4orf29-1394-002"; tissue "lv";
5	ncSplice	exon	1363101	1363179	.	+	.	gene_id "ENSMODG00000012274"; transcript_id "mdCircRNA-71"; exon_number "2" gene_name "C4orf29"; gene_biotype "protein_coding"; oId "lv:circC4orf29-1394-002"; tissue "lv";
5	ncSplice	exon	1363284	1363368	.	+	.	gene_id "ENSMODG00000012274"; transcript_id "mdCircRNA-71"; exon_number "3" gene_name "C4orf29"; gene_biotype "protein_coding"; oId "lv:circC4orf29-1394-002"; tissue "lv";
5	ncSplice	exon	1364225	1364252	.	+	.	gene_id "ENSMODG00000012274"; transcript_id "mdCircRNA-71"; exon_number "4" gene_name "C4orf29"; gene_biotype "protein_coding"; oId "lv:circC4orf29-1394-002"; tissue "lv";
5	ncSplice	exon	1370263	1370352	.	+	.	gene_id "ENSMODG00000012274"; transcript_id "mdCircRNA-71"; exon_number "5" gene_name "C4orf29"; gene_biotype "protein_coding"; oId "lv:circC4orf29-1394-002"; tissue "lv";
5	ncSplice	exon	1370455	1370556	.	+	.	gene_id "ENSMODG00000012274"; transcript_id "mdCircRNA-71"; exon_number "6" gene_name "C4orf29"; gene_biotype "protein_coding"; oId "lv:circC4orf29-1394-002"; tissue "lv";
5	ncSplice	gene	140821974	140824706	.	+	.	gene_id "ENSMODG00000000089"; gene_name "ELF2"; gene_source "ncSplice"; gene_biotype "protein_coding";
5	ncSplice	transcript	140821974	140824706	.	+	.	gene_id "ENSMODG00000000089"; transcript_id "mdCircRNA-72"; gene_name "ELF2"; gene_biotype "protein_coding"; transcript_biotype "circRNA"; oId "lv:circELF2-1395-001|ce:circELF2-2391-001|ts:circELF2-5999-001"; tissue "lv|ce|ts";
5	ncSplice	exon	140821974	140822210	.	+	.	gene_id "ENSMODG00000000089"; transcript_id "mdCircRNA-72"; exon_number "1" gene_name "ELF2"; gene_biotype "protein_coding"; oId "lv:circELF2-1395-001|ce:circELF2-2391-001|ts:circELF2-5999-001"; tissue "lv|ce|ts";
5	ncSplice	exon	140824541	140824706	.	+	.	gene_id "ENSMODG00000000089"; transcript_id "mdCircRNA-72"; exon_number "2" gene_name "ELF2"; gene_biotype "protein_coding"; oId "lv:circELF2-1395-001|ce:circELF2-2391-001|ts:circELF2-5999-001"; tissue "lv|ce|ts";
5	ncSplice	gene	1486903	1496891	.	+	.	gene_id "ENSMODG00000012300"; gene_name "LARP1B"; gene_source "ncSplice"; gene_biotype "protein_coding";
5	ncSplice	transcript	1486903	1496891	.	+	.	gene_id "ENSMODG00000012300"; transcript_id "mdCircRNA-73"; gene_name "LARP1B"; gene_biotype "protein_coding"; transcript_biotype "circRNA"; oId "lv:circLARP1B-1402-001"; tissue "lv";
5	ncSplice	exon	1486903	1487271	.	+	.	gene_id "ENSMODG00000012300"; transcript_id "mdCircRNA-73"; exon_number "1" gene_name "LARP1B"; gene_biotype "protein_coding"; oId "lv:circLARP1B-1402-001"; tissue "lv";
5	ncSplice	exon	1492817	1492940	.	+	.	gene_id "ENSMODG00000012300"; transcript_id "mdCircRNA-73"; exon_number "2" gene_name "LARP1B"; gene_biotype "protein_coding"; oId "lv:circLARP1B-1402-001"; tissue "lv";
5	ncSplice	exon	1494964	1495175	.	+	.	gene_id "ENSMODG00000012300"; transcript_id "mdCircRNA-73"; exon_number "3" gene_name "LARP1B"; gene_biotype "protein_coding"; oId "lv:circLARP1B-1402-001"; tissue "lv";
5	ncSplice	exon	1496785	1496891	.	+	.	gene_id "ENSMODG00000012300"; transcript_id "mdCircRNA-73"; exon_number "4" gene_name "LARP1B"; gene_biotype "protein_coding"; oId "lv:circLARP1B-1402-001"; tissue "lv";
5	ncSplice	gene	184695521	184733730	.	-	.	gene_id "ENSMODG00000020556"; gene_name "UBE2K"; gene_source "ncSplice"; gene_biotype "protein_coding";
5	ncSplice	transcript	184695521	184733730	.	-	.	gene_id "ENSMODG00000020556"; transcript_id "mdCircRNA-74"; gene_name "UBE2K"; gene_biotype "protein_coding"; transcript_biotype "circRNA"; oId "lv:circUBE2K-1412-001"; tissue "lv";
5	ncSplice	exon	184695521	184695620	.	-	.	gene_id "ENSMODG00000020556"; transcript_id "mdCircRNA-74"; exon_number "1" gene_name "UBE2K"; gene_biotype "protein_coding"; oId "lv:circUBE2K-1412-001"; tissue "lv";
5	ncSplice	exon	184713462	184713544	.	-	.	gene_id "ENSMODG00000020556"; transcript_id "mdCircRNA-74"; exon_number "2" gene_name "UBE2K"; gene_biotype "protein_coding"; oId "lv:circUBE2K-1412-001"; tissue "lv";
5	ncSplice	exon	184728925	184728983	.	-	.	gene_id "ENSMODG00000020556"; transcript_id "mdCircRNA-74"; exon_number "3" gene_name "UBE2K"; gene_biotype "protein_coding"; oId "lv:circUBE2K-1412-001"; tissue "lv";
5	ncSplice	exon	184733637	184733730	.	-	.	gene_id "ENSMODG00000020556"; transcript_id "mdCircRNA-74"; exon_number "4" gene_name "UBE2K"; gene_biotype "protein_coding"; oId "lv:circUBE2K-1412-001"; tissue "lv";
5	ncSplice	gene	184713462	184733730	.	-	.	gene_id "ENSMODG00000020556"; gene_name "UBE2K"; gene_source "ncSplice"; gene_biotype "protein_coding";
5	ncSplice	transcript	184713462	184733730	.	-	.	gene_id "ENSMODG00000020556"; transcript_id "mdCircRNA-75"; gene_name "UBE2K"; gene_biotype "protein_coding"; transcript_biotype "circRNA"; oId "lv:circUBE2K-1413-001"; tissue "lv";
5	ncSplice	exon	184713462	184713544	.	-	.	gene_id "ENSMODG00000020556"; transcript_id "mdCircRNA-75"; exon_number "1" gene_name "UBE2K"; gene_biotype "protein_coding"; oId "lv:circUBE2K-1413-001"; tissue "lv";
5	ncSplice	exon	184728925	184728983	.	-	.	gene_id "ENSMODG00000020556"; transcript_id "mdCircRNA-75"; exon_number "2" gene_name "UBE2K"; gene_biotype "protein_coding"; oId "lv:circUBE2K-1413-001"; tissue "lv";
5	ncSplice	exon	184733637	184733730	.	-	.	gene_id "ENSMODG00000020556"; transcript_id "mdCircRNA-75"; exon_number "3" gene_name "UBE2K"; gene_biotype "protein_coding"; oId "lv:circUBE2K-1413-001"; tissue "lv";
5	ncSplice	gene	268664873	268665825	.	+	.	gene_id "ENSMODG00000009706"; gene_name "QSER1"; gene_source "ncSplice"; gene_biotype "protein_coding";
5	ncSplice	transcript	268664873	268665825	.	+	.	gene_id "ENSMODG00000009706"; transcript_id "mdCircRNA-76"; gene_name "QSER1"; gene_biotype "protein_coding"; transcript_biotype "circRNA"; oId "lv:circQSER1-1483-001|ce:circQSER1-2522-001|ts:circQSER1-6396-001"; tissue "lv|ce|ts";
5	ncSplice	exon	268664873	268664985	.	+	.	gene_id "ENSMODG00000009706"; transcript_id "mdCircRNA-76"; exon_number "1" gene_name "QSER1"; gene_biotype "protein_coding"; oId "lv:circQSER1-1483-001|ce:circQSER1-2522-001|ts:circQSER1-6396-001"; tissue "lv|ce|ts";
5	ncSplice	exon	268665664	268665825	.	+	.	gene_id "ENSMODG00000009706"; transcript_id "mdCircRNA-76"; exon_number "2" gene_name "QSER1"; gene_biotype "protein_coding"; oId "lv:circQSER1-1483-001|ce:circQSER1-2522-001|ts:circQSER1-6396-001"; tissue "lv|ce|ts";
5	ncSplice	gene	62485672	62487437	.	-	.	gene_id "ENSMODG00000005914"; gene_name "CFI"; gene_source "ncSplice"; gene_biotype "protein_coding";
5	ncSplice	transcript	62485672	62487437	.	-	.	gene_id "ENSMODG00000005914"; transcript_id "mdCircRNA-77"; gene_name "CFI"; gene_biotype "protein_coding"; transcript_biotype "circRNA"; oId "lv:circCFI-1520-001"; tissue "lv";
5	ncSplice	exon	62485672	62485788	.	-	.	gene_id "ENSMODG00000005914"; transcript_id "mdCircRNA-77"; exon_number "1" gene_name "CFI"; gene_biotype "protein_coding"; oId "lv:circCFI-1520-001"; tissue "lv";
5	ncSplice	exon	62487334	62487437	.	-	.	gene_id "ENSMODG00000005914"; transcript_id "mdCircRNA-77"; exon_number "2" gene_name "CFI"; gene_biotype "protein_coding"; oId "lv:circCFI-1520-001"; tissue "lv";
5	ncSplice	gene	80532216	80560082	.	+	.	gene_id "ENSMODG00000004620"; gene_name "ACSL1"; gene_source "ncSplice"; gene_biotype "protein_coding";
5	ncSplice	transcript	80532216	80560082	.	+	.	gene_id "ENSMODG00000004620"; transcript_id "mdCircRNA-78"; gene_name "ACSL1"; gene_biotype "protein_coding"; transcript_biotype "circRNA"; oId "lv:circACSL1-1531-027"; tissue "lv";
5	ncSplice	exon	80532216	80532289	.	+	.	gene_id "ENSMODG00000004620"; transcript_id "mdCircRNA-78"; exon_number "1" gene_name "ACSL1"; gene_biotype "protein_coding"; oId "lv:circACSL1-1531-027"; tissue "lv";
5	ncSplice	exon	80538727	80538861	.	+	.	gene_id "ENSMODG00000004620"; transcript_id "mdCircRNA-78"; exon_number "2" gene_name "ACSL1"; gene_biotype "protein_coding"; oId "lv:circACSL1-1531-027"; tissue "lv";
5	ncSplice	exon	80539572	80539706	.	+	.	gene_id "ENSMODG00000004620"; transcript_id "mdCircRNA-78"; exon_number "3" gene_name "ACSL1"; gene_biotype "protein_coding"; oId "lv:circACSL1-1531-027"; tissue "lv";
5	ncSplice	exon	80541365	80541460	.	+	.	gene_id "ENSMODG00000004620"; transcript_id "mdCircRNA-78"; exon_number "4" gene_name "ACSL1"; gene_biotype "protein_coding"; oId "lv:circACSL1-1531-027"; tissue "lv";
5	ncSplice	exon	80553290	80553362	.	+	.	gene_id "ENSMODG00000004620"; transcript_id "mdCircRNA-78"; exon_number "5" gene_name "ACSL1"; gene_biotype "protein_coding"; oId "lv:circACSL1-1531-027"; tissue "lv";
5	ncSplice	exon	80556648	80556736	.	+	.	gene_id "ENSMODG00000004620"; transcript_id "mdCircRNA-78"; exon_number "6" gene_name "ACSL1"; gene_biotype "protein_coding"; oId "lv:circACSL1-1531-027"; tissue "lv";
5	ncSplice	exon	80557241	80557357	.	+	.	gene_id "ENSMODG00000004620"; transcript_id "mdCircRNA-78"; exon_number "7" gene_name "ACSL1"; gene_biotype "protein_coding"; oId "lv:circACSL1-1531-027"; tissue "lv";
5	ncSplice	exon	80559939	80560082	.	+	.	gene_id "ENSMODG00000004620"; transcript_id "mdCircRNA-78"; exon_number "8" gene_name "ACSL1"; gene_biotype "protein_coding"; oId "lv:circACSL1-1531-027"; tissue "lv";
5	ncSplice	gene	80556648	80561365	.	+	.	gene_id "ENSMODG00000004620"; gene_name "ACSL1"; gene_source "ncSplice"; gene_biotype "protein_coding";
5	ncSplice	transcript	80556648	80561365	.	+	.	gene_id "ENSMODG00000004620"; transcript_id "mdCircRNA-79"; gene_name "ACSL1"; gene_biotype "protein_coding"; transcript_biotype "circRNA"; oId "lv:circACSL1-1533-001|ce:circACSL1-2608-001"; tissue "lv|ce";
5	ncSplice	exon	80556648	80556736	.	+	.	gene_id "ENSMODG00000004620"; transcript_id "mdCircRNA-79"; exon_number "1" gene_name "ACSL1"; gene_biotype "protein_coding"; oId "lv:circACSL1-1533-001|ce:circACSL1-2608-001"; tissue "lv|ce";
5	ncSplice	exon	80557241	80557357	.	+	.	gene_id "ENSMODG00000004620"; transcript_id "mdCircRNA-79"; exon_number "2" gene_name "ACSL1"; gene_biotype "protein_coding"; oId "lv:circACSL1-1533-001|ce:circACSL1-2608-001"; tissue "lv|ce";
5	ncSplice	exon	80559939	80560082	.	+	.	gene_id "ENSMODG00000004620"; transcript_id "mdCircRNA-79"; exon_number "3" gene_name "ACSL1"; gene_biotype "protein_coding"; oId "lv:circACSL1-1533-001|ce:circACSL1-2608-001"; tissue "lv|ce";
5	ncSplice	exon	80560868	80560969	.	+	.	gene_id "ENSMODG00000004620"; transcript_id "mdCircRNA-79"; exon_number "4" gene_name "ACSL1"; gene_biotype "protein_coding"; oId "lv:circACSL1-1533-001|ce:circACSL1-2608-001"; tissue "lv|ce";
5	ncSplice	exon	80561294	80561365	.	+	.	gene_id "ENSMODG00000004620"; transcript_id "mdCircRNA-79"; exon_number "5" gene_name "ACSL1"; gene_biotype "protein_coding"; oId "lv:circACSL1-1533-001|ce:circACSL1-2608-001"; tissue "lv|ce";
6	ncSplice	gene	139630149	139643768	.	+	.	gene_id "ENSMODG00000012902"; gene_name "VPS13A"; gene_source "ncSplice"; gene_biotype "protein_coding";
6	ncSplice	transcript	139630149	139643768	.	+	.	gene_id "ENSMODG00000012902"; transcript_id "mdCircRNA-80"; gene_name "VPS13A"; gene_biotype "protein_coding"; transcript_biotype "circRNA"; oId "lv:circVPS13A-1570-001|ce:circVPS13A-2665-001|ts:circVPS13A-6717-001"; tissue "lv|ce|ts";
6	ncSplice	exon	139630149	139630192	.	+	.	gene_id "ENSMODG00000012902"; transcript_id "mdCircRNA-80"; exon_number "1" gene_name "VPS13A"; gene_biotype "protein_coding"; oId "lv:circVPS13A-1570-001|ce:circVPS13A-2665-001|ts:circVPS13A-6717-001"; tissue "lv|ce|ts";
6	ncSplice	exon	139634060	139634102	.	+	.	gene_id "ENSMODG00000012902"; transcript_id "mdCircRNA-80"; exon_number "2" gene_name "VPS13A"; gene_biotype "protein_coding"; oId "lv:circVPS13A-1570-001|ce:circVPS13A-2665-001|ts:circVPS13A-6717-001"; tissue "lv|ce|ts";
6	ncSplice	exon	139643305	139643400	.	+	.	gene_id "ENSMODG00000012902"; transcript_id "mdCircRNA-80"; exon_number "3" gene_name "VPS13A"; gene_biotype "protein_coding"; oId "lv:circVPS13A-1570-001|ce:circVPS13A-2665-001|ts:circVPS13A-6717-001"; tissue "lv|ce|ts";
6	ncSplice	exon	139643667	139643768	.	+	.	gene_id "ENSMODG00000012902"; transcript_id "mdCircRNA-80"; exon_number "4" gene_name "VPS13A"; gene_biotype "protein_coding"; oId "lv:circVPS13A-1570-001|ce:circVPS13A-2665-001|ts:circVPS13A-6717-001"; tissue "lv|ce|ts";
6	ncSplice	gene	150095792	150097098	.	+	.	gene_id "ENSMODG00000016674"; gene_name "DECR2"; gene_source "ncSplice"; gene_biotype "protein_coding";
6	ncSplice	transcript	150095792	150097098	.	+	.	gene_id "ENSMODG00000016674"; transcript_id "mdCircRNA-81"; gene_name "DECR2"; gene_biotype "protein_coding"; transcript_biotype "circRNA"; oId "lv:circDECR2-1583-002"; tissue "lv";
6	ncSplice	exon	150095792	150095843	.	+	.	gene_id "ENSMODG00000016674"; transcript_id "mdCircRNA-81"; exon_number "1" gene_name "DECR2"; gene_biotype "protein_coding"; oId "lv:circDECR2-1583-002"; tissue "lv";
6	ncSplice	exon	150096963	150097098	.	+	.	gene_id "ENSMODG00000016674"; transcript_id "mdCircRNA-81"; exon_number "2" gene_name "DECR2"; gene_biotype "protein_coding"; oId "lv:circDECR2-1583-002"; tissue "lv";
6	ncSplice	gene	150113534	150122508	.	+	.	gene_id "ENSMODG00000016674"; gene_name "DECR2"; gene_source "ncSplice"; gene_biotype "protein_coding";
6	ncSplice	transcript	150113534	150122508	.	+	.	gene_id "ENSMODG00000016674"; transcript_id "mdCircRNA-82"; gene_name "DECR2"; gene_biotype "protein_coding"; transcript_biotype "circRNA"; oId "lv:circDECR2-1585-002"; tissue "lv";
6	ncSplice	exon	150113534	150113658	.	+	.	gene_id "ENSMODG00000016674"; transcript_id "mdCircRNA-82"; exon_number "1" gene_name "DECR2"; gene_biotype "protein_coding"; oId "lv:circDECR2-1585-002"; tissue "lv";
6	ncSplice	exon	150113975	150114068	.	+	.	gene_id "ENSMODG00000016674"; transcript_id "mdCircRNA-82"; exon_number "2" gene_name "DECR2"; gene_biotype "protein_coding"; oId "lv:circDECR2-1585-002"; tissue "lv";
6	ncSplice	exon	150115568	150115672	.	+	.	gene_id "ENSMODG00000016674"; transcript_id "mdCircRNA-82"; exon_number "3" gene_name "DECR2"; gene_biotype "protein_coding"; oId "lv:circDECR2-1585-002"; tissue "lv";
6	ncSplice	exon	150117080	150117297	.	+	.	gene_id "ENSMODG00000016674"; transcript_id "mdCircRNA-82"; exon_number "4" gene_name "DECR2"; gene_biotype "protein_coding"; oId "lv:circDECR2-1585-002"; tissue "lv";
6	ncSplice	exon	150122390	150122508	.	+	.	gene_id "ENSMODG00000016674"; transcript_id "mdCircRNA-82"; exon_number "5" gene_name "DECR2"; gene_biotype "protein_coding"; oId "lv:circDECR2-1585-002"; tissue "lv";
6	ncSplice	gene	159444064	159455550	.	+	.	gene_id "ENSMODG00000015516"; gene_name "XPO6"; gene_source "ncSplice"; gene_biotype "protein_coding";
6	ncSplice	transcript	159444064	159455550	.	+	.	gene_id "ENSMODG00000015516"; transcript_id "mdCircRNA-83"; gene_name "XPO6"; gene_biotype "protein_coding"; transcript_biotype "circRNA"; oId "lv:circXPO6-1595-007"; tissue "lv";
6	ncSplice	exon	159444064	159444144	.	+	.	gene_id "ENSMODG00000015516"; transcript_id "mdCircRNA-83"; exon_number "1" gene_name "XPO6"; gene_biotype "protein_coding"; oId "lv:circXPO6-1595-007"; tissue "lv";
6	ncSplice	exon	159444456	159444517	.	+	.	gene_id "ENSMODG00000015516"; transcript_id "mdCircRNA-83"; exon_number "2" gene_name "XPO6"; gene_biotype "protein_coding"; oId "lv:circXPO6-1595-007"; tissue "lv";
6	ncSplice	exon	159448250	159448376	.	+	.	gene_id "ENSMODG00000015516"; transcript_id "mdCircRNA-83"; exon_number "3" gene_name "XPO6"; gene_biotype "protein_coding"; oId "lv:circXPO6-1595-007"; tissue "lv";
6	ncSplice	exon	159455441	159455550	.	+	.	gene_id "ENSMODG00000015516"; transcript_id "mdCircRNA-83"; exon_number "4" gene_name "XPO6"; gene_biotype "protein_coding"; oId "lv:circXPO6-1595-007"; tissue "lv";
6	ncSplice	gene	1673554	1685598	.	-	.	gene_id "ENSMODG00000013365"; gene_name "SECISBP2"; gene_source "ncSplice"; gene_biotype "protein_coding";
6	ncSplice	transcript	1673554	1685598	.	-	.	gene_id "ENSMODG00000013365"; transcript_id "mdCircRNA-84"; gene_name "SECISBP2"; gene_biotype "protein_coding"; transcript_biotype "circRNA"; oId "lv:circSECISBP2-1599-001|ce:circSECISBP2-2725-001|ts:circSECISBP2-6871-001"; tissue "lv|ce|ts";
6	ncSplice	exon	1673554	1673774	.	-	.	gene_id "ENSMODG00000013365"; transcript_id "mdCircRNA-84"; exon_number "1" gene_name "SECISBP2"; gene_biotype "protein_coding"; oId "lv:circSECISBP2-1599-001|ce:circSECISBP2-2725-001|ts:circSECISBP2-6871-001"; tissue "lv|ce|ts";
6	ncSplice	exon	1674834	1675011	.	-	.	gene_id "ENSMODG00000013365"; transcript_id "mdCircRNA-84"; exon_number "2" gene_name "SECISBP2"; gene_biotype "protein_coding"; oId "lv:circSECISBP2-1599-001|ce:circSECISBP2-2725-001|ts:circSECISBP2-6871-001"; tissue "lv|ce|ts";
6	ncSplice	exon	1677756	1677894	.	-	.	gene_id "ENSMODG00000013365"; transcript_id "mdCircRNA-84"; exon_number "3" gene_name "SECISBP2"; gene_biotype "protein_coding"; oId "lv:circSECISBP2-1599-001|ce:circSECISBP2-2725-001|ts:circSECISBP2-6871-001"; tissue "lv|ce|ts";
6	ncSplice	exon	1678768	1678934	.	-	.	gene_id "ENSMODG00000013365"; transcript_id "mdCircRNA-84"; exon_number "4" gene_name "SECISBP2"; gene_biotype "protein_coding"; oId "lv:circSECISBP2-1599-001|ce:circSECISBP2-2725-001|ts:circSECISBP2-6871-001"; tissue "lv|ce|ts";
6	ncSplice	exon	1683126	1683258	.	-	.	gene_id "ENSMODG00000013365"; transcript_id "mdCircRNA-84"; exon_number "5" gene_name "SECISBP2"; gene_biotype "protein_coding"; oId "lv:circSECISBP2-1599-001|ce:circSECISBP2-2725-001|ts:circSECISBP2-6871-001"; tissue "lv|ce|ts";
6	ncSplice	exon	1684730	1684819	.	-	.	gene_id "ENSMODG00000013365"; transcript_id "mdCircRNA-84"; exon_number "6" gene_name "SECISBP2"; gene_biotype "protein_coding"; oId "lv:circSECISBP2-1599-001|ce:circSECISBP2-2725-001|ts:circSECISBP2-6871-001"; tissue "lv|ce|ts";
6	ncSplice	exon	1685509	1685598	.	-	.	gene_id "ENSMODG00000013365"; transcript_id "mdCircRNA-84"; exon_number "7" gene_name "SECISBP2"; gene_biotype "protein_coding"; oId "lv:circSECISBP2-1599-001|ce:circSECISBP2-2725-001|ts:circSECISBP2-6871-001"; tissue "lv|ce|ts";
6	ncSplice	gene	179467680	179474709	.	+	.	gene_id "ENSMODG00000014913"; gene_name "CCDC171"; gene_source "ncSplice"; gene_biotype "protein_coding";
6	ncSplice	transcript	179467680	179474709	.	+	.	gene_id "ENSMODG00000014913"; transcript_id "mdCircRNA-85"; gene_name "CCDC171"; gene_biotype "protein_coding"; transcript_biotype "circRNA"; oId "lv:circCCDC171-1617-001|ts:circCCDC171-6919-001"; tissue "lv|ts";
6	ncSplice	exon	179467680	179467829	.	+	.	gene_id "ENSMODG00000014913"; transcript_id "mdCircRNA-85"; exon_number "1" gene_name "CCDC171"; gene_biotype "protein_coding"; oId "lv:circCCDC171-1617-001|ts:circCCDC171-6919-001"; tissue "lv|ts";
6	ncSplice	exon	179474642	179474709	.	+	.	gene_id "ENSMODG00000014913"; transcript_id "mdCircRNA-85"; exon_number "2" gene_name "CCDC171"; gene_biotype "protein_coding"; oId "lv:circCCDC171-1617-001|ts:circCCDC171-6919-001"; tissue "lv|ts";
6	ncSplice	gene	285217574	285227620	.	+	.	gene_id "ENSMODG00000012657"; gene_name "CDK13"; gene_source "ncSplice"; gene_biotype "protein_coding";
6	ncSplice	transcript	285217574	285227620	.	+	.	gene_id "ENSMODG00000012657"; transcript_id "mdCircRNA-86"; gene_name "CDK13"; gene_biotype "protein_coding"; transcript_biotype "circRNA"; oId "lv:circCDK13-1665-002|ts:circCDK13-7189-001"; tissue "lv|ts";
6	ncSplice	exon	285217574	285218200	.	+	.	gene_id "ENSMODG00000012657"; transcript_id "mdCircRNA-86"; exon_number "1" gene_name "CDK13"; gene_biotype "protein_coding"; oId "lv:circCDK13-1665-002|ts:circCDK13-7189-001"; tissue "lv|ts";
6	ncSplice	exon	285223876	285224046	.	+	.	gene_id "ENSMODG00000012657"; transcript_id "mdCircRNA-86"; exon_number "2" gene_name "CDK13"; gene_biotype "protein_coding"; oId "lv:circCDK13-1665-002|ts:circCDK13-7189-001"; tissue "lv|ts";
6	ncSplice	exon	285226001	285226140	.	+	.	gene_id "ENSMODG00000012657"; transcript_id "mdCircRNA-86"; exon_number "3" gene_name "CDK13"; gene_biotype "protein_coding"; oId "lv:circCDK13-1665-002|ts:circCDK13-7189-001"; tissue "lv|ts";
6	ncSplice	exon	285227450	285227620	.	+	.	gene_id "ENSMODG00000012657"; transcript_id "mdCircRNA-86"; exon_number "4" gene_name "CDK13"; gene_biotype "protein_coding"; oId "lv:circCDK13-1665-002|ts:circCDK13-7189-001"; tissue "lv|ts";
7	ncSplice	gene	102908025	102908981	.	-	.	gene_id "ENSMODG00000008985"; gene_name "DNAJC3"; gene_source "ncSplice"; gene_biotype "protein_coding";
7	ncSplice	transcript	102908025	102908981	.	-	.	gene_id "ENSMODG00000008985"; transcript_id "mdCircRNA-87"; gene_name "DNAJC3"; gene_biotype "protein_coding"; transcript_biotype "circRNA"; oId "lv:circDNAJC3-1704-001"; tissue "lv";
7	ncSplice	exon	102908025	102908144	.	-	.	gene_id "ENSMODG00000008985"; transcript_id "mdCircRNA-87"; exon_number "1" gene_name "DNAJC3"; gene_biotype "protein_coding"; oId "lv:circDNAJC3-1704-001"; tissue "lv";
7	ncSplice	exon	102908800	102908981	.	-	.	gene_id "ENSMODG00000008985"; transcript_id "mdCircRNA-87"; exon_number "2" gene_name "DNAJC3"; gene_biotype "protein_coding"; oId "lv:circDNAJC3-1704-001"; tissue "lv";
7	ncSplice	gene	137292291	137294940	.	-	.	gene_id "ENSMODG00000001157"; gene_name "FBXL3"; gene_source "ncSplice"; gene_biotype "protein_coding";
7	ncSplice	transcript	137292291	137294940	.	-	.	gene_id "ENSMODG00000001157"; transcript_id "mdCircRNA-88"; gene_name "FBXL3"; gene_biotype "protein_coding"; transcript_biotype "circRNA"; oId "lv:circFBXL3-1708-001|ce:circFBXL3-2901-001|ts:circFBXL3-7454-001"; tissue "lv|ce|ts";
7	ncSplice	exon	137292291	137292413	.	-	.	gene_id "ENSMODG00000001157"; transcript_id "mdCircRNA-88"; exon_number "1" gene_name "FBXL3"; gene_biotype "protein_coding"; oId "lv:circFBXL3-1708-001|ce:circFBXL3-2901-001|ts:circFBXL3-7454-001"; tissue "lv|ce|ts";
7	ncSplice	exon	137294586	137294940	.	-	.	gene_id "ENSMODG00000001157"; transcript_id "mdCircRNA-88"; exon_number "2" gene_name "FBXL3"; gene_biotype "protein_coding"; oId "lv:circFBXL3-1708-001|ce:circFBXL3-2901-001|ts:circFBXL3-7454-001"; tissue "lv|ce|ts";
7	ncSplice	gene	184223359	184237853	.	-	.	gene_id "ENSMODG00000015793"; gene_name "CPS1"; gene_source "ncSplice"; gene_biotype "protein_coding";
7	ncSplice	transcript	184223359	184237853	.	-	.	gene_id "ENSMODG00000015793"; transcript_id "mdCircRNA-89"; gene_name "CPS1"; gene_biotype "protein_coding"; transcript_biotype "circRNA"; oId "lv:circCPS1-1740-001"; tissue "lv";
7	ncSplice	exon	184223359	184237154	.	-	.	gene_id "ENSMODG00000015793"; transcript_id "mdCircRNA-89"; exon_number "1" gene_name "CPS1"; gene_biotype "protein_coding"; oId "lv:circCPS1-1740-001"; tissue "lv";
7	ncSplice	exon	184237709	184237853	.	-	.	gene_id "ENSMODG00000015793"; transcript_id "mdCircRNA-89"; exon_number "2" gene_name "CPS1"; gene_biotype "protein_coding"; oId "lv:circCPS1-1740-001"; tissue "lv";
7	ncSplice	gene	184764349	184791168	.	+	.	gene_id "ENSMODG00000015823"; gene_name "KANSL1L"; gene_source "ncSplice"; gene_biotype "protein_coding";
7	ncSplice	transcript	184764349	184791168	.	+	.	gene_id "ENSMODG00000015823"; transcript_id "mdCircRNA-90"; gene_name "KANSL1L"; gene_biotype "protein_coding"; transcript_biotype "circRNA"; oId "lv:circKANSL1L-1752-002|ts:circKANSL1L-7583-001"; tissue "lv|ts";
7	ncSplice	exon	184764349	184764490	.	+	.	gene_id "ENSMODG00000015823"; transcript_id "mdCircRNA-90"; exon_number "1" gene_name "KANSL1L"; gene_biotype "protein_coding"; oId "lv:circKANSL1L-1752-002|ts:circKANSL1L-7583-001"; tissue "lv|ts";
7	ncSplice	exon	184779610	184779807	.	+	.	gene_id "ENSMODG00000015823"; transcript_id "mdCircRNA-90"; exon_number "2" gene_name "KANSL1L"; gene_biotype "protein_coding"; oId "lv:circKANSL1L-1752-002|ts:circKANSL1L-7583-001"; tissue "lv|ts";
7	ncSplice	exon	184791047	184791168	.	+	.	gene_id "ENSMODG00000015823"; transcript_id "mdCircRNA-90"; exon_number "3" gene_name "KANSL1L"; gene_biotype "protein_coding"; oId "lv:circKANSL1L-1752-002|ts:circKANSL1L-7583-001"; tissue "lv|ts";
7	ncSplice	gene	243737469	243738568	.	-	.	gene_id "ENSMODG00000015684"; gene_name "RSRC1"; gene_source "ncSplice"; gene_biotype "protein_coding";
7	ncSplice	transcript	243737469	243738568	.	-	.	gene_id "ENSMODG00000015684"; transcript_id "mdCircRNA-91"; gene_name "RSRC1"; gene_biotype "protein_coding"; transcript_biotype "circRNA"; oId "lv:circRSRC1-1789-001|ce:circRSRC1-3024-001|ts:circRSRC1-7742-001"; tissue "lv|ce|ts";
7	ncSplice	exon	243737469	243737594	.	-	.	gene_id "ENSMODG00000015684"; transcript_id "mdCircRNA-91"; exon_number "1" gene_name "RSRC1"; gene_biotype "protein_coding"; oId "lv:circRSRC1-1789-001|ce:circRSRC1-3024-001|ts:circRSRC1-7742-001"; tissue "lv|ce|ts";
7	ncSplice	exon	243738366	243738568	.	-	.	gene_id "ENSMODG00000015684"; transcript_id "mdCircRNA-91"; exon_number "2" gene_name "RSRC1"; gene_biotype "protein_coding"; oId "lv:circRSRC1-1789-001|ce:circRSRC1-3024-001|ts:circRSRC1-7742-001"; tissue "lv|ce|ts";
7	ncSplice	gene	77748587	77754915	.	+	.	gene_id "ENSMODG00000003945"; gene_name "PCID2"; gene_source "ncSplice"; gene_biotype "protein_coding";
7	ncSplice	transcript	77748587	77754915	.	+	.	gene_id "ENSMODG00000003945"; transcript_id "mdCircRNA-92"; gene_name "PCID2"; gene_biotype "protein_coding"; transcript_biotype "circRNA"; oId "lv:circPCID2-1821-001|ts:circPCID2-7865-001"; tissue "lv|ts";
7	ncSplice	exon	77748587	77748660	.	+	.	gene_id "ENSMODG00000003945"; transcript_id "mdCircRNA-92"; exon_number "1" gene_name "PCID2"; gene_biotype "protein_coding"; oId "lv:circPCID2-1821-001|ts:circPCID2-7865-001"; tissue "lv|ts";
7	ncSplice	exon	77749725	77749790	.	+	.	gene_id "ENSMODG00000003945"; transcript_id "mdCircRNA-92"; exon_number "2" gene_name "PCID2"; gene_biotype "protein_coding"; oId "lv:circPCID2-1821-001|ts:circPCID2-7865-001"; tissue "lv|ts";
7	ncSplice	exon	77750946	77750987	.	+	.	gene_id "ENSMODG00000003945"; transcript_id "mdCircRNA-92"; exon_number "3" gene_name "PCID2"; gene_biotype "protein_coding"; oId "lv:circPCID2-1821-001|ts:circPCID2-7865-001"; tissue "lv|ts";
7	ncSplice	exon	77753537	77753591	.	+	.	gene_id "ENSMODG00000003945"; transcript_id "mdCircRNA-92"; exon_number "4" gene_name "PCID2"; gene_biotype "protein_coding"; oId "lv:circPCID2-1821-001|ts:circPCID2-7865-001"; tissue "lv|ts";
7	ncSplice	exon	77754812	77754915	.	+	.	gene_id "ENSMODG00000003945"; transcript_id "mdCircRNA-92"; exon_number "5" gene_name "PCID2"; gene_biotype "protein_coding"; oId "lv:circPCID2-1821-001|ts:circPCID2-7865-001"; tissue "lv|ts";
7	ncSplice	gene	77811408	77825858	.	-	.	gene_id "ENSMODG00000003968"; gene_name "PROZ"; gene_source "ncSplice"; gene_biotype "protein_coding";
7	ncSplice	transcript	77811408	77825858	.	-	.	gene_id "ENSMODG00000003968"; transcript_id "mdCircRNA-93"; gene_name "PROZ"; gene_biotype "protein_coding"; transcript_biotype "circRNA"; oId "lv:circPROZ-1822-003"; tissue "lv";
7	ncSplice	exon	77811408	77811984	.	-	.	gene_id "ENSMODG00000003968"; transcript_id "mdCircRNA-93"; exon_number "1" gene_name "PROZ"; gene_biotype "protein_coding"; oId "lv:circPROZ-1822-003"; tissue "lv";
7	ncSplice	exon	77815685	77815761	.	-	.	gene_id "ENSMODG00000003968"; transcript_id "mdCircRNA-93"; exon_number "2" gene_name "PROZ"; gene_biotype "protein_coding"; oId "lv:circPROZ-1822-003"; tissue "lv";
7	ncSplice	exon	77816985	77817116	.	-	.	gene_id "ENSMODG00000003968"; transcript_id "mdCircRNA-93"; exon_number "3" gene_name "PROZ"; gene_biotype "protein_coding"; oId "lv:circPROZ-1822-003"; tissue "lv";
7	ncSplice	exon	77823277	77823390	.	-	.	gene_id "ENSMODG00000003968"; transcript_id "mdCircRNA-93"; exon_number "4" gene_name "PROZ"; gene_biotype "protein_coding"; oId "lv:circPROZ-1822-003"; tissue "lv";
7	ncSplice	exon	77825834	77825858	.	-	.	gene_id "ENSMODG00000003968"; transcript_id "mdCircRNA-93"; exon_number "5" gene_name "PROZ"; gene_biotype "protein_coding"; oId "lv:circPROZ-1822-003"; tissue "lv";
8	ncSplice	gene	135931429	135945074	.	+	.	gene_id "ENSMODG00000016802"; gene_name "DHTKD1"; gene_source "ncSplice"; gene_biotype "protein_coding";
8	ncSplice	transcript	135931429	135945074	.	+	.	gene_id "ENSMODG00000016802"; transcript_id "mdCircRNA-94"; gene_name "DHTKD1"; gene_biotype "protein_coding"; transcript_biotype "circRNA"; oId "lv:circDHTKD1-1872-006"; tissue "lv";
8	ncSplice	exon	135931429	135931584	.	+	.	gene_id "ENSMODG00000016802"; transcript_id "mdCircRNA-94"; exon_number "1" gene_name "DHTKD1"; gene_biotype "protein_coding"; oId "lv:circDHTKD1-1872-006"; tissue "lv";
8	ncSplice	exon	135933598	135933809	.	+	.	gene_id "ENSMODG00000016802"; transcript_id "mdCircRNA-94"; exon_number "2" gene_name "DHTKD1"; gene_biotype "protein_coding"; oId "lv:circDHTKD1-1872-006"; tissue "lv";
8	ncSplice	exon	135935404	135935598	.	+	.	gene_id "ENSMODG00000016802"; transcript_id "mdCircRNA-94"; exon_number "3" gene_name "DHTKD1"; gene_biotype "protein_coding"; oId "lv:circDHTKD1-1872-006"; tissue "lv";
8	ncSplice	exon	135937366	135937635	.	+	.	gene_id "ENSMODG00000016802"; transcript_id "mdCircRNA-94"; exon_number "4" gene_name "DHTKD1"; gene_biotype "protein_coding"; oId "lv:circDHTKD1-1872-006"; tissue "lv";
8	ncSplice	exon	135942577	135942748	.	+	.	gene_id "ENSMODG00000016802"; transcript_id "mdCircRNA-94"; exon_number "5" gene_name "DHTKD1"; gene_biotype "protein_coding"; oId "lv:circDHTKD1-1872-006"; tissue "lv";
8	ncSplice	exon	135944876	135945074	.	+	.	gene_id "ENSMODG00000016802"; transcript_id "mdCircRNA-94"; exon_number "6" gene_name "DHTKD1"; gene_biotype "protein_coding"; oId "lv:circDHTKD1-1872-006"; tissue "lv";
8	ncSplice	gene	189904913	189906046	.	-	.	gene_id "8:189904912:189906046:-1"; gene_name "8:189904912:189906046:-1"; gene_source "ncSplice"; gene_biotype "novel";
8	ncSplice	transcript	189904913	189906046	.	-	.	gene_id "8:189904912:189906046:-1"; transcript_id "mdCircRNA-95"; gene_name "8:189904912:189906046:-1"; gene_biotype "novel"; transcript_biotype "circRNA"; oId "lv:circ8:189904912:189906046:-1-1888-001"; tissue "lv";
8	ncSplice	exon	189904913	189904991	.	-	.	gene_id "8:189904912:189906046:-1"; transcript_id "mdCircRNA-95"; exon_number "1" gene_name "8:189904912:189906046:-1"; gene_biotype "novel"; oId "lv:circ8:189904912:189906046:-1-1888-001"; tissue "lv";
8	ncSplice	exon	189905966	189906046	.	-	.	gene_id "8:189904912:189906046:-1"; transcript_id "mdCircRNA-95"; exon_number "2" gene_name "8:189904912:189906046:-1"; gene_biotype "novel"; oId "lv:circ8:189904912:189906046:-1-1888-001"; tissue "lv";
8	ncSplice	gene	228527112	228533105	.	-	.	gene_id "ENSMODG00000005957"; gene_name "LARP4B"; gene_source "ncSplice"; gene_biotype "protein_coding";
8	ncSplice	transcript	228527112	228533105	.	-	.	gene_id "ENSMODG00000005957"; transcript_id "mdCircRNA-96"; gene_name "LARP4B"; gene_biotype "protein_coding"; transcript_biotype "circRNA"; oId "lv:circLARP4B-1919-001"; tissue "lv";
8	ncSplice	exon	228527112	228527276	.	-	.	gene_id "ENSMODG00000005957"; transcript_id "mdCircRNA-96"; exon_number "1" gene_name "LARP4B"; gene_biotype "protein_coding"; oId "lv:circLARP4B-1919-001"; tissue "lv";
8	ncSplice	exon	228531449	228531494	.	-	.	gene_id "ENSMODG00000005957"; transcript_id "mdCircRNA-96"; exon_number "2" gene_name "LARP4B"; gene_biotype "protein_coding"; oId "lv:circLARP4B-1919-001"; tissue "lv";
8	ncSplice	exon	228532188	228532439	.	-	.	gene_id "ENSMODG00000005957"; transcript_id "mdCircRNA-96"; exon_number "3" gene_name "LARP4B"; gene_biotype "protein_coding"; oId "lv:circLARP4B-1919-001"; tissue "lv";
8	ncSplice	exon	228532999	228533105	.	-	.	gene_id "ENSMODG00000005957"; transcript_id "mdCircRNA-96"; exon_number "4" gene_name "LARP4B"; gene_biotype "protein_coding"; oId "lv:circLARP4B-1919-001"; tissue "lv";
8	ncSplice	gene	241390192	241405744	.	-	.	gene_id "ENSMODG00000007847"; gene_name "ZEB1"; gene_source "ncSplice"; gene_biotype "protein_coding";
8	ncSplice	transcript	241390192	241405744	.	-	.	gene_id "ENSMODG00000007847"; transcript_id "mdCircRNA-97"; gene_name "ZEB1"; gene_biotype "protein_coding"; transcript_biotype "circRNA"; oId "lv:circZEB1-1934-001"; tissue "lv";
8	ncSplice	exon	241390192	241390332	.	-	.	gene_id "ENSMODG00000007847"; transcript_id "mdCircRNA-97"; exon_number "1" gene_name "ZEB1"; gene_biotype "protein_coding"; oId "lv:circZEB1-1934-001"; tissue "lv";
8	ncSplice	exon	241400152	241400226	.	-	.	gene_id "ENSMODG00000007847"; transcript_id "mdCircRNA-97"; exon_number "2" gene_name "ZEB1"; gene_biotype "protein_coding"; oId "lv:circZEB1-1934-001"; tissue "lv";
8	ncSplice	exon	241405695	241405744	.	-	.	gene_id "ENSMODG00000007847"; transcript_id "mdCircRNA-97"; exon_number "3" gene_name "ZEB1"; gene_biotype "protein_coding"; oId "lv:circZEB1-1934-001"; tissue "lv";
8	ncSplice	gene	241390192	241405849	.	-	.	gene_id "ENSMODG00000007847"; gene_name "ZEB1"; gene_source "ncSplice"; gene_biotype "protein_coding";
8	ncSplice	transcript	241390192	241405849	.	-	.	gene_id "ENSMODG00000007847"; transcript_id "mdCircRNA-98"; gene_name "ZEB1"; gene_biotype "protein_coding"; transcript_biotype "circRNA"; oId "lv:circZEB1-1935-001"; tissue "lv";
8	ncSplice	exon	241390192	241390332	.	-	.	gene_id "ENSMODG00000007847"; transcript_id "mdCircRNA-98"; exon_number "1" gene_name "ZEB1"; gene_biotype "protein_coding"; oId "lv:circZEB1-1935-001"; tissue "lv";
8	ncSplice	exon	241400152	241400226	.	-	.	gene_id "ENSMODG00000007847"; transcript_id "mdCircRNA-98"; exon_number "2" gene_name "ZEB1"; gene_biotype "protein_coding"; oId "lv:circZEB1-1935-001"; tissue "lv";
8	ncSplice	exon	241405695	241405849	.	-	.	gene_id "ENSMODG00000007847"; transcript_id "mdCircRNA-98"; exon_number "3" gene_name "ZEB1"; gene_biotype "protein_coding"; oId "lv:circZEB1-1935-001"; tissue "lv";
8	ncSplice	gene	264812721	264826681	.	-	.	gene_id "8:264812720:264826681:-1"; gene_name "8:264812720:264826681:-1"; gene_source "ncSplice"; gene_biotype "novel";
8	ncSplice	transcript	264812721	264826681	.	-	.	gene_id "8:264812720:264826681:-1"; transcript_id "mdCircRNA-99"; gene_name "8:264812720:264826681:-1"; gene_biotype "novel"; transcript_biotype "circRNA"; oId "lv:circ8:264812720:264826681:-1-1953-002"; tissue "lv";
8	ncSplice	exon	264812721	264812811	.	-	.	gene_id "8:264812720:264826681:-1"; transcript_id "mdCircRNA-99"; exon_number "1" gene_name "8:264812720:264826681:-1"; gene_biotype "novel"; oId "lv:circ8:264812720:264826681:-1-1953-002"; tissue "lv";
8	ncSplice	exon	264813012	264813065	.	-	.	gene_id "8:264812720:264826681:-1"; transcript_id "mdCircRNA-99"; exon_number "2" gene_name "8:264812720:264826681:-1"; gene_biotype "novel"; oId "lv:circ8:264812720:264826681:-1-1953-002"; tissue "lv";
8	ncSplice	exon	264817988	264818066	.	-	.	gene_id "8:264812720:264826681:-1"; transcript_id "mdCircRNA-99"; exon_number "3" gene_name "8:264812720:264826681:-1"; gene_biotype "novel"; oId "lv:circ8:264812720:264826681:-1-1953-002"; tissue "lv";
8	ncSplice	exon	264826569	264826681	.	-	.	gene_id "8:264812720:264826681:-1"; transcript_id "mdCircRNA-99"; exon_number "4" gene_name "8:264812720:264826681:-1"; gene_biotype "novel"; oId "lv:circ8:264812720:264826681:-1-1953-002"; tissue "lv";
8	ncSplice	gene	264897227	264902832	.	-	.	gene_id "ENSMODG00000010715"; gene_name "PEX1"; gene_source "ncSplice"; gene_biotype "protein_coding";
8	ncSplice	transcript	264897227	264902832	.	-	.	gene_id "ENSMODG00000010715"; transcript_id "mdCircRNA-100"; gene_name "PEX1"; gene_biotype "protein_coding"; transcript_biotype "circRNA"; oId "lv:circPEX1-1954-001|ce:circPEX1-3289-001"; tissue "lv|ce";
8	ncSplice	exon	264897227	264897323	.	-	.	gene_id "ENSMODG00000010715"; transcript_id "mdCircRNA-100"; exon_number "1" gene_name "PEX1"; gene_biotype "protein_coding"; oId "lv:circPEX1-1954-001|ce:circPEX1-3289-001"; tissue "lv|ce";
8	ncSplice	exon	264898596	264898728	.	-	.	gene_id "ENSMODG00000010715"; transcript_id "mdCircRNA-100"; exon_number "2" gene_name "PEX1"; gene_biotype "protein_coding"; oId "lv:circPEX1-1954-001|ce:circPEX1-3289-001"; tissue "lv|ce";
8	ncSplice	exon	264900002	264900084	.	-	.	gene_id "ENSMODG00000010715"; transcript_id "mdCircRNA-100"; exon_number "3" gene_name "PEX1"; gene_biotype "protein_coding"; oId "lv:circPEX1-1954-001|ce:circPEX1-3289-001"; tissue "lv|ce";
8	ncSplice	exon	264900961	264901070	.	-	.	gene_id "ENSMODG00000010715"; transcript_id "mdCircRNA-100"; exon_number "4" gene_name "PEX1"; gene_biotype "protein_coding"; oId "lv:circPEX1-1954-001|ce:circPEX1-3289-001"; tissue "lv|ce";
8	ncSplice	exon	264901281	264901404	.	-	.	gene_id "ENSMODG00000010715"; transcript_id "mdCircRNA-100"; exon_number "5" gene_name "PEX1"; gene_biotype "protein_coding"; oId "lv:circPEX1-1954-001|ce:circPEX1-3289-001"; tissue "lv|ce";
8	ncSplice	exon	264902713	264902832	.	-	.	gene_id "ENSMODG00000010715"; transcript_id "mdCircRNA-100"; exon_number "6" gene_name "PEX1"; gene_biotype "protein_coding"; oId "lv:circPEX1-1954-001|ce:circPEX1-3289-001"; tissue "lv|ce";
8	ncSplice	gene	49693277	49699598	.	-	.	gene_id "ENSMODG00000020471"; gene_name "PPP1R12A"; gene_source "ncSplice"; gene_biotype "protein_coding";
8	ncSplice	transcript	49693277	49699598	.	-	.	gene_id "ENSMODG00000020471"; transcript_id "mdCircRNA-101"; gene_name "PPP1R12A"; gene_biotype "protein_coding"; transcript_biotype "circRNA"; oId "lv:circPPP1R12A-1974-001|ce:circPPP1R12A-3336-001|ts:circPPP1R12A-8513-001"; tissue "lv|ce|ts";
8	ncSplice	exon	49693277	49693434	.	-	.	gene_id "ENSMODG00000020471"; transcript_id "mdCircRNA-101"; exon_number "1" gene_name "PPP1R12A"; gene_biotype "protein_coding"; oId "lv:circPPP1R12A-1974-001|ce:circPPP1R12A-3336-001|ts:circPPP1R12A-8513-001"; tissue "lv|ce|ts";
8	ncSplice	exon	49693577	49693665	.	-	.	gene_id "ENSMODG00000020471"; transcript_id "mdCircRNA-101"; exon_number "2" gene_name "PPP1R12A"; gene_biotype "protein_coding"; oId "lv:circPPP1R12A-1974-001|ce:circPPP1R12A-3336-001|ts:circPPP1R12A-8513-001"; tissue "lv|ce|ts";
8	ncSplice	exon	49694215	49694289	.	-	.	gene_id "ENSMODG00000020471"; transcript_id "mdCircRNA-101"; exon_number "3" gene_name "PPP1R12A"; gene_biotype "protein_coding"; oId "lv:circPPP1R12A-1974-001|ce:circPPP1R12A-3336-001|ts:circPPP1R12A-8513-001"; tissue "lv|ce|ts";
8	ncSplice	exon	49696577	49696721	.	-	.	gene_id "ENSMODG00000020471"; transcript_id "mdCircRNA-101"; exon_number "4" gene_name "PPP1R12A"; gene_biotype "protein_coding"; oId "lv:circPPP1R12A-1974-001|ce:circPPP1R12A-3336-001|ts:circPPP1R12A-8513-001"; tissue "lv|ce|ts";
8	ncSplice	exon	49699439	49699598	.	-	.	gene_id "ENSMODG00000020471"; transcript_id "mdCircRNA-101"; exon_number "5" gene_name "PPP1R12A"; gene_biotype "protein_coding"; oId "lv:circPPP1R12A-1974-001|ce:circPPP1R12A-3336-001|ts:circPPP1R12A-8513-001"; tissue "lv|ce|ts";
Un	ncSplice	gene	10090321	10094460	.	+	.	gene_id "ENSMODG00000020902"; gene_name "ACSF2"; gene_source "ncSplice"; gene_biotype "protein_coding";
Un	ncSplice	transcript	10090321	10094460	.	+	.	gene_id "ENSMODG00000020902"; transcript_id "mdCircRNA-102"; gene_name "ACSF2"; gene_biotype "protein_coding"; transcript_biotype "circRNA"; oId "lv:circACSF2-2024-001|ts:circACSF2-8698-001"; tissue "lv|ts";
Un	ncSplice	exon	10090321	10090428	.	+	.	gene_id "ENSMODG00000020902"; transcript_id "mdCircRNA-102"; exon_number "1" gene_name "ACSF2"; gene_biotype "protein_coding"; oId "lv:circACSF2-2024-001|ts:circACSF2-8698-001"; tissue "lv|ts";
Un	ncSplice	exon	10093578	10093729	.	+	.	gene_id "ENSMODG00000020902"; transcript_id "mdCircRNA-102"; exon_number "2" gene_name "ACSF2"; gene_biotype "protein_coding"; oId "lv:circACSF2-2024-001|ts:circACSF2-8698-001"; tissue "lv|ts";
Un	ncSplice	exon	10094086	10094227	.	+	.	gene_id "ENSMODG00000020902"; transcript_id "mdCircRNA-102"; exon_number "3" gene_name "ACSF2"; gene_biotype "protein_coding"; oId "lv:circACSF2-2024-001|ts:circACSF2-8698-001"; tissue "lv|ts";
Un	ncSplice	exon	10094347	10094460	.	+	.	gene_id "ENSMODG00000020902"; transcript_id "mdCircRNA-102"; exon_number "4" gene_name "ACSF2"; gene_biotype "protein_coding"; oId "lv:circACSF2-2024-001|ts:circACSF2-8698-001"; tissue "lv|ts";
Un	ncSplice	gene	70980641	70980849	.	-	.	gene_id "Un:70980640:70980849:-1"; gene_name "Un:70980640:70980849:-1"; gene_source "ncSplice"; gene_biotype "novel";
Un	ncSplice	transcript	70980641	70980849	.	-	.	gene_id "Un:70980640:70980849:-1"; transcript_id "mdCircRNA-103"; gene_name "Un:70980640:70980849:-1"; gene_biotype "novel"; transcript_biotype "circRNA"; oId "lv:circUn:70980640:70980849:-1-2032-001"; tissue "lv";
Un	ncSplice	exon	70980641	70980701	.	-	.	gene_id "Un:70980640:70980849:-1"; transcript_id "mdCircRNA-103"; exon_number "1" gene_name "Un:70980640:70980849:-1"; gene_biotype "novel"; oId "lv:circUn:70980640:70980849:-1-2032-001"; tissue "lv";
Un	ncSplice	exon	70980819	70980849	.	-	.	gene_id "Un:70980640:70980849:-1"; transcript_id "mdCircRNA-103"; exon_number "2" gene_name "Un:70980640:70980849:-1"; gene_biotype "novel"; oId "lv:circUn:70980640:70980849:-1-2032-001"; tissue "lv";
Un	ncSplice	gene	71863521	71863729	.	-	.	gene_id "Un:71863520:71863729:-1"; gene_name "Un:71863520:71863729:-1"; gene_source "ncSplice"; gene_biotype "novel";
Un	ncSplice	transcript	71863521	71863729	.	-	.	gene_id "Un:71863520:71863729:-1"; transcript_id "mdCircRNA-104"; gene_name "Un:71863520:71863729:-1"; gene_biotype "novel"; transcript_biotype "circRNA"; oId "lv:circUn:71863520:71863729:-1-2035-001"; tissue "lv";
Un	ncSplice	exon	71863521	71863649	.	-	.	gene_id "Un:71863520:71863729:-1"; transcript_id "mdCircRNA-104"; exon_number "1" gene_name "Un:71863520:71863729:-1"; gene_biotype "novel"; oId "lv:circUn:71863520:71863729:-1-2035-001"; tissue "lv";
Un	ncSplice	exon	71863717	71863729	.	-	.	gene_id "Un:71863520:71863729:-1"; transcript_id "mdCircRNA-104"; exon_number "2" gene_name "Un:71863520:71863729:-1"; gene_biotype "novel"; oId "lv:circUn:71863520:71863729:-1-2035-001"; tissue "lv";
Un	ncSplice	gene	72126274	72126482	.	-	.	gene_id "ENSMODG00000029085"; gene_name "NA"; gene_source "ncSplice"; gene_biotype "protein_coding";
Un	ncSplice	transcript	72126274	72126482	.	-	.	gene_id "ENSMODG00000029085"; transcript_id "mdCircRNA-105"; gene_name "NA"; gene_biotype "protein_coding"; transcript_biotype "circRNA"; oId "lv:circNA-2036-001"; tissue "lv";
Un	ncSplice	exon	72126274	72126402	.	-	.	gene_id "ENSMODG00000029085"; transcript_id "mdCircRNA-105"; exon_number "1" gene_name "NA"; gene_biotype "protein_coding"; oId "lv:circNA-2036-001"; tissue "lv";
Un	ncSplice	exon	72126470	72126482	.	-	.	gene_id "ENSMODG00000029085"; transcript_id "mdCircRNA-105"; exon_number "2" gene_name "NA"; gene_biotype "protein_coding"; oId "lv:circNA-2036-001"; tissue "lv";
X	ncSplice	gene	55993062	55997830	.	-	.	gene_id "ENSMODG00000003920"; gene_name "ATRX"; gene_source "ncSplice"; gene_biotype "protein_coding";
X	ncSplice	transcript	55993062	55997830	.	-	.	gene_id "ENSMODG00000003920"; transcript_id "mdCircRNA-106"; gene_name "ATRX"; gene_biotype "protein_coding"; transcript_biotype "circRNA"; oId "lv:circATRX-2055-001"; tissue "lv";
X	ncSplice	exon	55993062	55993179	.	-	.	gene_id "ENSMODG00000003920"; transcript_id "mdCircRNA-106"; exon_number "1" gene_name "ATRX"; gene_biotype "protein_coding"; oId "lv:circATRX-2055-001"; tissue "lv";
X	ncSplice	exon	55995946	55996121	.	-	.	gene_id "ENSMODG00000003920"; transcript_id "mdCircRNA-106"; exon_number "2" gene_name "ATRX"; gene_biotype "protein_coding"; oId "lv:circATRX-2055-001"; tissue "lv";
X	ncSplice	exon	55997693	55997830	.	-	.	gene_id "ENSMODG00000003920"; transcript_id "mdCircRNA-106"; exon_number "3" gene_name "ATRX"; gene_biotype "protein_coding"; oId "lv:circATRX-2055-001"; tissue "lv";
1	ncSplice	gene	10098934	10116460	.	-	.	gene_id "ENSMODG00000011336"; gene_name "NA"; gene_source "ncSplice"; gene_biotype "protein_coding";
1	ncSplice	transcript	10098934	10116460	.	-	.	gene_id "ENSMODG00000011336"; transcript_id "mdCircRNA-107"; gene_name "NA"; gene_biotype "protein_coding"; transcript_biotype "circRNA"; oId "lv:circNA-2062-001"; tissue "lv";
1	ncSplice	exon	10098934	10116460	.	-	.	gene_id "ENSMODG00000011336"; transcript_id "mdCircRNA-107"; exon_number "1" gene_name "NA"; gene_biotype "protein_coding"; oId "lv:circNA-2062-001"; tissue "lv";
1	ncSplice	gene	10098934	10118893	.	-	.	gene_id "ENSMODG00000011336"; gene_name "NA"; gene_source "ncSplice"; gene_biotype "protein_coding";
1	ncSplice	transcript	10098934	10118893	.	-	.	gene_id "ENSMODG00000011336"; transcript_id "mdCircRNA-108"; gene_name "NA"; gene_biotype "protein_coding"; transcript_biotype "circRNA"; oId "lv:circNA-2063-001"; tissue "lv";
1	ncSplice	exon	10098934	10118893	.	-	.	gene_id "ENSMODG00000011336"; transcript_id "mdCircRNA-108"; exon_number "1" gene_name "NA"; gene_biotype "protein_coding"; oId "lv:circNA-2063-001"; tissue "lv";
1	ncSplice	gene	180897656	180900483	.	+	.	gene_id "ENSMODG00000002320"; gene_name "SLC27A2"; gene_source "ncSplice"; gene_biotype "protein_coding";
1	ncSplice	transcript	180897656	180900483	.	+	.	gene_id "ENSMODG00000002320"; transcript_id "mdCircRNA-109"; gene_name "SLC27A2"; gene_biotype "protein_coding"; transcript_biotype "circRNA"; oId "lv:circSLC27A2-2082-001"; tissue "lv";
1	ncSplice	exon	180897656	180900483	.	+	.	gene_id "ENSMODG00000002320"; transcript_id "mdCircRNA-109"; exon_number "1" gene_name "SLC27A2"; gene_biotype "protein_coding"; oId "lv:circSLC27A2-2082-001"; tissue "lv";
1	ncSplice	gene	284710806	284711418	.	+	.	gene_id "ENSMODG00000011739"; gene_name "NA"; gene_source "ncSplice"; gene_biotype "protein_coding";
1	ncSplice	transcript	284710806	284711418	.	+	.	gene_id "ENSMODG00000011739"; transcript_id "mdCircRNA-110"; gene_name "NA"; gene_biotype "protein_coding"; transcript_biotype "circRNA"; oId "lv:circNA-2108-001|ce:circNA-3560-001|ts:circNA-9053-001"; tissue "lv|ce|ts";
1	ncSplice	exon	284710806	284711418	.	+	.	gene_id "ENSMODG00000011739"; transcript_id "mdCircRNA-110"; exon_number "1" gene_name "NA"; gene_biotype "protein_coding"; oId "lv:circNA-2108-001|ce:circNA-3560-001|ts:circNA-9053-001"; tissue "lv|ce|ts";
1	ncSplice	gene	474777889	474779412	.	+	.	gene_id "ENSMODG00000016842"; gene_name "YTHDF1"; gene_source "ncSplice"; gene_biotype "protein_coding";
1	ncSplice	transcript	474777889	474779412	.	+	.	gene_id "ENSMODG00000016842"; transcript_id "mdCircRNA-111"; gene_name "YTHDF1"; gene_biotype "protein_coding"; transcript_biotype "circRNA"; oId "lv:circYTHDF1-2128-001|ts:circYTHDF1-9277-001"; tissue "lv|ts";
1	ncSplice	exon	474777889	474779412	.	+	.	gene_id "ENSMODG00000016842"; transcript_id "mdCircRNA-111"; exon_number "1" gene_name "YTHDF1"; gene_biotype "protein_coding"; oId "lv:circYTHDF1-2128-001|ts:circYTHDF1-9277-001"; tissue "lv|ts";
1	ncSplice	gene	573020199	573020914	.	-	.	gene_id "ENSMODG00000010691"; gene_name "WHSC1L1"; gene_source "ncSplice"; gene_biotype "protein_coding";
1	ncSplice	transcript	573020199	573020914	.	-	.	gene_id "ENSMODG00000010691"; transcript_id "mdCircRNA-112"; gene_name "WHSC1L1"; gene_biotype "protein_coding"; transcript_biotype "circRNA"; oId "lv:circWHSC1L1-2139-001|ce:circWHSC1L1-3676-001|ts:circWHSC1L1-9378-001"; tissue "lv|ce|ts";
1	ncSplice	exon	573020199	573020914	.	-	.	gene_id "ENSMODG00000010691"; transcript_id "mdCircRNA-112"; exon_number "1" gene_name "WHSC1L1"; gene_biotype "protein_coding"; oId "lv:circWHSC1L1-2139-001|ce:circWHSC1L1-3676-001|ts:circWHSC1L1-9378-001"; tissue "lv|ce|ts";
1	ncSplice	gene	614846032	614847452	.	+	.	gene_id "ENSMODG00000004860"; gene_name "MKKS"; gene_source "ncSplice"; gene_biotype "protein_coding";
1	ncSplice	transcript	614846032	614847452	.	+	.	gene_id "ENSMODG00000004860"; transcript_id "mdCircRNA-113"; gene_name "MKKS"; gene_biotype "protein_coding"; transcript_biotype "circRNA"; oId "lv:circMKKS-2145-001"; tissue "lv";
1	ncSplice	exon	614846032	614847452	.	+	.	gene_id "ENSMODG00000004860"; transcript_id "mdCircRNA-113"; exon_number "1" gene_name "MKKS"; gene_biotype "protein_coding"; oId "lv:circMKKS-2145-001"; tissue "lv";
1	ncSplice	gene	648966134	648966681	.	-	.	gene_id "ENSMODG00000001169"; gene_name "FOXN2"; gene_source "ncSplice"; gene_biotype "protein_coding";
1	ncSplice	transcript	648966134	648966681	.	-	.	gene_id "ENSMODG00000001169"; transcript_id "mdCircRNA-114"; gene_name "FOXN2"; gene_biotype "protein_coding"; transcript_biotype "circRNA"; oId "lv:circFOXN2-2151-001|ts:circFOXN2-9456-001"; tissue "lv|ts";
1	ncSplice	exon	648966134	648966681	.	-	.	gene_id "ENSMODG00000001169"; transcript_id "mdCircRNA-114"; exon_number "1" gene_name "FOXN2"; gene_biotype "protein_coding"; oId "lv:circFOXN2-2151-001|ts:circFOXN2-9456-001"; tissue "lv|ts";
1	ncSplice	gene	654596641	654597500	.	-	.	gene_id "ENSMODG00000000678"; gene_name "PPM1B"; gene_source "ncSplice"; gene_biotype "protein_coding";
1	ncSplice	transcript	654596641	654597500	.	-	.	gene_id "ENSMODG00000000678"; transcript_id "mdCircRNA-115"; gene_name "PPM1B"; gene_biotype "protein_coding"; transcript_biotype "circRNA"; oId "lv:circPPM1B-2152-001|ce:circPPM1B-3711-001|ts:circPPM1B-9463-001"; tissue "lv|ce|ts";
1	ncSplice	exon	654596641	654597500	.	-	.	gene_id "ENSMODG00000000678"; transcript_id "mdCircRNA-115"; exon_number "1" gene_name "PPM1B"; gene_biotype "protein_coding"; oId "lv:circPPM1B-2152-001|ce:circPPM1B-3711-001|ts:circPPM1B-9463-001"; tissue "lv|ce|ts";
2	ncSplice	gene	190241458	190242199	.	-	.	gene_id "ENSMODG00000017033"; gene_name "ASH1L"; gene_source "ncSplice"; gene_biotype "protein_coding";
2	ncSplice	transcript	190241458	190242199	.	-	.	gene_id "ENSMODG00000017033"; transcript_id "mdCircRNA-116"; gene_name "ASH1L"; gene_biotype "protein_coding"; transcript_biotype "circRNA"; oId "lv:circASH1L-2178-001|ce:circASH1L-3816-001|ts:circASH1L-9710-001"; tissue "lv|ce|ts";
2	ncSplice	exon	190241458	190242199	.	-	.	gene_id "ENSMODG00000017033"; transcript_id "mdCircRNA-116"; exon_number "1" gene_name "ASH1L"; gene_biotype "protein_coding"; oId "lv:circASH1L-2178-001|ce:circASH1L-3816-001|ts:circASH1L-9710-001"; tissue "lv|ce|ts";
2	ncSplice	gene	277127306	277128040	.	+	.	gene_id "ENSMODG00000013447"; gene_name "TBC1D22B"; gene_source "ncSplice"; gene_biotype "protein_coding";
2	ncSplice	transcript	277127306	277128040	.	+	.	gene_id "ENSMODG00000013447"; transcript_id "mdCircRNA-117"; gene_name "TBC1D22B"; gene_biotype "protein_coding"; transcript_biotype "circRNA"; oId "lv:circTBC1D22B-2203-001|ce:circTBC1D22B-3868-001|ts:circTBC1D22B-9829-001"; tissue "lv|ce|ts";
2	ncSplice	exon	277127306	277128040	.	+	.	gene_id "ENSMODG00000013447"; transcript_id "mdCircRNA-117"; exon_number "1" gene_name "TBC1D22B"; gene_biotype "protein_coding"; oId "lv:circTBC1D22B-2203-001|ce:circTBC1D22B-3868-001|ts:circTBC1D22B-9829-001"; tissue "lv|ce|ts";
3	ncSplice	gene	281646699	281647157	.	+	.	gene_id "ENSMODG00000021417"; gene_name "LDLRAD4"; gene_source "ncSplice"; gene_biotype "protein_coding";
3	ncSplice	transcript	281646699	281647157	.	+	.	gene_id "ENSMODG00000021417"; transcript_id "mdCircRNA-118"; gene_name "LDLRAD4"; gene_biotype "protein_coding"; transcript_biotype "circRNA"; oId "lv:circLDLRAD4-2277-001|ce:circLDLRAD4-4042-001|ts:circLDLRAD4-10296-001"; tissue "lv|ce|ts";
3	ncSplice	exon	281646699	281647157	.	+	.	gene_id "ENSMODG00000021417"; transcript_id "mdCircRNA-118"; exon_number "1" gene_name "LDLRAD4"; gene_biotype "protein_coding"; oId "lv:circLDLRAD4-2277-001|ce:circLDLRAD4-4042-001|ts:circLDLRAD4-10296-001"; tissue "lv|ce|ts";
3	ncSplice	gene	463520165	463520716	.	+	.	gene_id "ENSMODG00000015101"; gene_name "INSR"; gene_source "ncSplice"; gene_biotype "protein_coding";
3	ncSplice	transcript	463520165	463520716	.	+	.	gene_id "ENSMODG00000015101"; transcript_id "mdCircRNA-119"; gene_name "INSR"; gene_biotype "protein_coding"; transcript_biotype "circRNA"; oId "lv:circINSR-2287-001|ce:circINSR-4107-001"; tissue "lv|ce";
3	ncSplice	exon	463520165	463520716	.	+	.	gene_id "ENSMODG00000015101"; transcript_id "mdCircRNA-119"; exon_number "1" gene_name "INSR"; gene_biotype "protein_coding"; oId "lv:circINSR-2287-001|ce:circINSR-4107-001"; tissue "lv|ce";
4	ncSplice	gene	305652991	305653845	.	-	.	gene_id "4:305652990:305653845:-1"; gene_name "4:305652990:305653845:-1"; gene_source "ncSplice"; gene_biotype "novel";
4	ncSplice	transcript	305652991	305653845	.	-	.	gene_id "4:305652990:305653845:-1"; transcript_id "mdCircRNA-120"; gene_name "4:305652990:305653845:-1"; gene_biotype "novel"; transcript_biotype "circRNA"; oId "lv:circ4:305652990:305653845:-1-2320-001|ts:circ4:305652990:305653845:-1-10752-001"; tissue "lv|ts";
4	ncSplice	exon	305652991	305653845	.	-	.	gene_id "4:305652990:305653845:-1"; transcript_id "mdCircRNA-120"; exon_number "1" gene_name "4:305652990:305653845:-1"; gene_biotype "novel"; oId "lv:circ4:305652990:305653845:-1-2320-001|ts:circ4:305652990:305653845:-1-10752-001"; tissue "lv|ts";
4	ncSplice	gene	434277017	434277485	.	+	.	gene_id "ENSMODG00000009563"; gene_name "RERE"; gene_source "ncSplice"; gene_biotype "protein_coding";
4	ncSplice	transcript	434277017	434277485	.	+	.	gene_id "ENSMODG00000009563"; transcript_id "mdCircRNA-121"; gene_name "RERE"; gene_biotype "protein_coding"; transcript_biotype "circRNA"; oId "lv:circRERE-2331-001"; tissue "lv";
4	ncSplice	exon	434277017	434277485	.	+	.	gene_id "ENSMODG00000009563"; transcript_id "mdCircRNA-121"; exon_number "1" gene_name "RERE"; gene_biotype "protein_coding"; oId "lv:circRERE-2331-001"; tissue "lv";
8	ncSplice	gene	117976964	117977794	.	+	.	gene_id "ENSMODG00000018407"; gene_name "ERC1"; gene_source "ncSplice"; gene_biotype "protein_coding";
8	ncSplice	transcript	117976964	117977794	.	+	.	gene_id "ENSMODG00000018407"; transcript_id "mdCircRNA-122"; gene_name "ERC1"; gene_biotype "protein_coding"; transcript_biotype "circRNA"; oId "lv:circERC1-2433-001"; tissue "lv";
8	ncSplice	exon	117976964	117977794	.	+	.	gene_id "ENSMODG00000018407"; transcript_id "mdCircRNA-122"; exon_number "1" gene_name "ERC1"; gene_biotype "protein_coding"; oId "lv:circERC1-2433-001"; tissue "lv";
8	ncSplice	gene	122496672	122499898	.	+	.	gene_id "ENSMODG00000018519"; gene_name "SLC38A4"; gene_source "ncSplice"; gene_biotype "protein_coding";
8	ncSplice	transcript	122496672	122499898	.	+	.	gene_id "ENSMODG00000018519"; transcript_id "mdCircRNA-123"; gene_name "SLC38A4"; gene_biotype "protein_coding"; transcript_biotype "circRNA"; oId "lv:circSLC38A4-2439-001"; tissue "lv";
8	ncSplice	exon	122496672	122499898	.	+	.	gene_id "ENSMODG00000018519"; transcript_id "mdCircRNA-123"; exon_number "1" gene_name "SLC38A4"; gene_biotype "protein_coding"; oId "lv:circSLC38A4-2439-001"; tissue "lv";
8	ncSplice	gene	264660318	264660587	.	+	.	gene_id "ENSMODG00000010686"; gene_name "ANKIB1"; gene_source "ncSplice"; gene_biotype "protein_coding";
8	ncSplice	transcript	264660318	264660587	.	+	.	gene_id "ENSMODG00000010686"; transcript_id "mdCircRNA-124"; gene_name "ANKIB1"; gene_biotype "protein_coding"; transcript_biotype "circRNA"; oId "lv:circANKIB1-2452-001|ce:circANKIB1-4656-001|ts:circANKIB1-11770-001"; tissue "lv|ce|ts";
8	ncSplice	exon	264660318	264660587	.	+	.	gene_id "ENSMODG00000010686"; transcript_id "mdCircRNA-124"; exon_number "1" gene_name "ANKIB1"; gene_biotype "protein_coding"; oId "lv:circANKIB1-2452-001|ce:circANKIB1-4656-001|ts:circANKIB1-11770-001"; tissue "lv|ce|ts";
8	ncSplice	gene	284594667	284594846	.	-	.	gene_id "8:284594666:284594846:-1"; gene_name "8:284594666:284594846:-1"; gene_source "ncSplice"; gene_biotype "novel";
8	ncSplice	transcript	284594667	284594846	.	-	.	gene_id "8:284594666:284594846:-1"; transcript_id "mdCircRNA-125"; gene_name "8:284594666:284594846:-1"; gene_biotype "novel"; transcript_biotype "circRNA"; oId "lv:circ8:284594666:284594846:-1-2457-001"; tissue "lv";
8	ncSplice	exon	284594667	284594846	.	-	.	gene_id "8:284594666:284594846:-1"; transcript_id "mdCircRNA-125"; exon_number "1" gene_name "8:284594666:284594846:-1"; gene_biotype "novel"; oId "lv:circ8:284594666:284594846:-1-2457-001"; tissue "lv";
8	ncSplice	gene	72458678	72460185	.	-	.	gene_id "ENSMODG00000008126"; gene_name "USP44"; gene_source "ncSplice"; gene_biotype "protein_coding";
8	ncSplice	transcript	72458678	72460185	.	-	.	gene_id "ENSMODG00000008126"; transcript_id "mdCircRNA-126"; gene_name "USP44"; gene_biotype "protein_coding"; transcript_biotype "circRNA"; oId "lv:circUSP44-2462-001"; tissue "lv";
8	ncSplice	exon	72458678	72460185	.	-	.	gene_id "ENSMODG00000008126"; transcript_id "mdCircRNA-126"; exon_number "1" gene_name "USP44"; gene_biotype "protein_coding"; oId "lv:circUSP44-2462-001"; tissue "lv";
8	ncSplice	gene	90450657	90450881	.	-	.	gene_id "ENSMODG00000001122"; gene_name "RBFOX2"; gene_source "ncSplice"; gene_biotype "protein_coding";
8	ncSplice	transcript	90450657	90450881	.	-	.	gene_id "ENSMODG00000001122"; transcript_id "mdCircRNA-127"; gene_name "RBFOX2"; gene_biotype "protein_coding"; transcript_biotype "circRNA"; oId "lv:circRBFOX2-2465-001|ce:circRBFOX2-4707-001"; tissue "lv|ce";
8	ncSplice	exon	90450657	90450881	.	-	.	gene_id "ENSMODG00000001122"; transcript_id "mdCircRNA-127"; exon_number "1" gene_name "RBFOX2"; gene_biotype "protein_coding"; oId "lv:circRBFOX2-2465-001|ce:circRBFOX2-4707-001"; tissue "lv|ce";
Un	ncSplice	gene	53128723	53128865	.	+	.	gene_id "ENSMODG00000006049"; gene_name "NA"; gene_source "ncSplice"; gene_biotype "protein_coding";
Un	ncSplice	transcript	53128723	53128865	.	+	.	gene_id "ENSMODG00000006049"; transcript_id "mdCircRNA-128"; gene_name "NA"; gene_biotype "protein_coding"; transcript_biotype "circRNA"; oId "lv:circNA-2479-001"; tissue "lv";
Un	ncSplice	exon	53128723	53128865	.	+	.	gene_id "ENSMODG00000006049"; transcript_id "mdCircRNA-128"; exon_number "1" gene_name "NA"; gene_biotype "protein_coding"; oId "lv:circNA-2479-001"; tissue "lv";
Un	ncSplice	gene	68116761	68116969	.	-	.	gene_id "Un:68116760:68116969:-1"; gene_name "Un:68116760:68116969:-1"; gene_source "ncSplice"; gene_biotype "novel";
Un	ncSplice	transcript	68116761	68116969	.	-	.	gene_id "Un:68116760:68116969:-1"; transcript_id "mdCircRNA-129"; gene_name "Un:68116760:68116969:-1"; gene_biotype "novel"; transcript_biotype "circRNA"; oId "lv:circUn:68116760:68116969:-1-2483-001|ts:circUn:68116760:68116969:-1-11996-001"; tissue "lv|ts";
Un	ncSplice	exon	68116761	68116969	.	-	.	gene_id "Un:68116760:68116969:-1"; transcript_id "mdCircRNA-129"; exon_number "1" gene_name "Un:68116760:68116969:-1"; gene_biotype "novel"; oId "lv:circUn:68116760:68116969:-1-2483-001|ts:circUn:68116760:68116969:-1-11996-001"; tissue "lv|ts";
1	ncSplice	gene	108969184	108971426	.	-	.	gene_id "ENSMODG00000011165"; gene_name "CNNM2"; gene_source "ncSplice"; gene_biotype "protein_coding";
1	ncSplice	transcript	108969184	108971426	.	-	.	gene_id "ENSMODG00000011165"; transcript_id "mdCircRNA-130"; gene_name "CNNM2"; gene_biotype "protein_coding"; transcript_biotype "circRNA"; oId "ce:circCNNM2-8-001"; tissue "ce";
1	ncSplice	exon	108969184	108969353	.	-	.	gene_id "ENSMODG00000011165"; transcript_id "mdCircRNA-130"; exon_number "1" gene_name "CNNM2"; gene_biotype "protein_coding"; oId "ce:circCNNM2-8-001"; tissue "ce";
1	ncSplice	exon	108971289	108971426	.	-	.	gene_id "ENSMODG00000011165"; transcript_id "mdCircRNA-130"; exon_number "2" gene_name "CNNM2"; gene_biotype "protein_coding"; oId "ce:circCNNM2-8-001"; tissue "ce";
1	ncSplice	gene	110513277	110526330	.	+	.	gene_id "ENSMODG00000011732"; gene_name "FBXW4"; gene_source "ncSplice"; gene_biotype "protein_coding";
1	ncSplice	transcript	110513277	110526330	.	+	.	gene_id "ENSMODG00000011732"; transcript_id "mdCircRNA-131"; gene_name "FBXW4"; gene_biotype "protein_coding"; transcript_biotype "circRNA"; oId "ce:circFBXW4-15-001|ts:circFBXW4-33-001"; tissue "ce|ts";
1	ncSplice	exon	110513277	110513372	.	+	.	gene_id "ENSMODG00000011732"; transcript_id "mdCircRNA-131"; exon_number "1" gene_name "FBXW4"; gene_biotype "protein_coding"; oId "ce:circFBXW4-15-001|ts:circFBXW4-33-001"; tissue "ce|ts";
1	ncSplice	exon	110518804	110518989	.	+	.	gene_id "ENSMODG00000011732"; transcript_id "mdCircRNA-131"; exon_number "2" gene_name "FBXW4"; gene_biotype "protein_coding"; oId "ce:circFBXW4-15-001|ts:circFBXW4-33-001"; tissue "ce|ts";
1	ncSplice	exon	110519474	110519606	.	+	.	gene_id "ENSMODG00000011732"; transcript_id "mdCircRNA-131"; exon_number "3" gene_name "FBXW4"; gene_biotype "protein_coding"; oId "ce:circFBXW4-15-001|ts:circFBXW4-33-001"; tissue "ce|ts";
1	ncSplice	exon	110526236	110526330	.	+	.	gene_id "ENSMODG00000011732"; transcript_id "mdCircRNA-131"; exon_number "4" gene_name "FBXW4"; gene_biotype "protein_coding"; oId "ce:circFBXW4-15-001|ts:circFBXW4-33-001"; tissue "ce|ts";
1	ncSplice	gene	110518804	110526330	.	+	.	gene_id "ENSMODG00000011732"; gene_name "FBXW4"; gene_source "ncSplice"; gene_biotype "protein_coding";
1	ncSplice	transcript	110518804	110526330	.	+	.	gene_id "ENSMODG00000011732"; transcript_id "mdCircRNA-132"; gene_name "FBXW4"; gene_biotype "protein_coding"; transcript_biotype "circRNA"; oId "ce:circFBXW4-16-001|ts:circFBXW4-34-001"; tissue "ce|ts";
1	ncSplice	exon	110518804	110518989	.	+	.	gene_id "ENSMODG00000011732"; transcript_id "mdCircRNA-132"; exon_number "1" gene_name "FBXW4"; gene_biotype "protein_coding"; oId "ce:circFBXW4-16-001|ts:circFBXW4-34-001"; tissue "ce|ts";
1	ncSplice	exon	110519474	110519606	.	+	.	gene_id "ENSMODG00000011732"; transcript_id "mdCircRNA-132"; exon_number "2" gene_name "FBXW4"; gene_biotype "protein_coding"; oId "ce:circFBXW4-16-001|ts:circFBXW4-34-001"; tissue "ce|ts";
1	ncSplice	exon	110526236	110526330	.	+	.	gene_id "ENSMODG00000011732"; transcript_id "mdCircRNA-132"; exon_number "3" gene_name "FBXW4"; gene_biotype "protein_coding"; oId "ce:circFBXW4-16-001|ts:circFBXW4-34-001"; tissue "ce|ts";
1	ncSplice	gene	124273123	124287026	.	+	.	gene_id "ENSMODG00000019593"; gene_name "NTRK3"; gene_source "ncSplice"; gene_biotype "protein_coding";
1	ncSplice	transcript	124273123	124287026	.	+	.	gene_id "ENSMODG00000019593"; transcript_id "mdCircRNA-133"; gene_name "NTRK3"; gene_biotype "protein_coding"; transcript_biotype "circRNA"; oId "ce:circNTRK3-30-001"; tissue "ce";
1	ncSplice	exon	124273123	124273253	.	+	.	gene_id "ENSMODG00000019593"; transcript_id "mdCircRNA-133"; exon_number "1" gene_name "NTRK3"; gene_biotype "protein_coding"; oId "ce:circNTRK3-30-001"; tissue "ce";
1	ncSplice	exon	124283323	124283495	.	+	.	gene_id "ENSMODG00000019593"; transcript_id "mdCircRNA-133"; exon_number "2" gene_name "NTRK3"; gene_biotype "protein_coding"; oId "ce:circNTRK3-30-001"; tissue "ce";
1	ncSplice	exon	124286783	124287026	.	+	.	gene_id "ENSMODG00000019593"; transcript_id "mdCircRNA-133"; exon_number "3" gene_name "NTRK3"; gene_biotype "protein_coding"; oId "ce:circNTRK3-30-001"; tissue "ce";
1	ncSplice	gene	140921036	140924590	.	+	.	gene_id "ENSMODG00000011885"; gene_name "NA"; gene_source "ncSplice"; gene_biotype "protein_coding";
1	ncSplice	transcript	140921036	140924590	.	+	.	gene_id "ENSMODG00000011885"; transcript_id "mdCircRNA-134"; gene_name "NA"; gene_biotype "protein_coding"; transcript_biotype "circRNA"; oId "ce:circNA-46-001|ts:circNA-99-001"; tissue "ce|ts";
1	ncSplice	exon	140921036	140921186	.	+	.	gene_id "ENSMODG00000011885"; transcript_id "mdCircRNA-134"; exon_number "1" gene_name "NA"; gene_biotype "protein_coding"; oId "ce:circNA-46-001|ts:circNA-99-001"; tissue "ce|ts";
1	ncSplice	exon	140923392	140923500	.	+	.	gene_id "ENSMODG00000011885"; transcript_id "mdCircRNA-134"; exon_number "2" gene_name "NA"; gene_biotype "protein_coding"; oId "ce:circNA-46-001|ts:circNA-99-001"; tissue "ce|ts";
1	ncSplice	exon	140924371	140924590	.	+	.	gene_id "ENSMODG00000011885"; transcript_id "mdCircRNA-134"; exon_number "3" gene_name "NA"; gene_biotype "protein_coding"; oId "ce:circNA-46-001|ts:circNA-99-001"; tissue "ce|ts";
1	ncSplice	gene	141839772	141881257	.	-	.	gene_id "ENSMODG00000011835"; gene_name "APBA2"; gene_source "ncSplice"; gene_biotype "protein_coding";
1	ncSplice	transcript	141839772	141881257	.	-	.	gene_id "ENSMODG00000011835"; transcript_id "mdCircRNA-135"; gene_name "APBA2"; gene_biotype "protein_coding"; transcript_biotype "circRNA"; oId "ce:circAPBA2-48-001"; tissue "ce";
1	ncSplice	exon	141839772	141839891	.	-	.	gene_id "ENSMODG00000011835"; transcript_id "mdCircRNA-135"; exon_number "1" gene_name "APBA2"; gene_biotype "protein_coding"; oId "ce:circAPBA2-48-001"; tissue "ce";
1	ncSplice	exon	141845694	141845906	.	-	.	gene_id "ENSMODG00000011835"; transcript_id "mdCircRNA-135"; exon_number "2" gene_name "APBA2"; gene_biotype "protein_coding"; oId "ce:circAPBA2-48-001"; tissue "ce";
1	ncSplice	exon	141850045	141850224	.	-	.	gene_id "ENSMODG00000011835"; transcript_id "mdCircRNA-135"; exon_number "3" gene_name "APBA2"; gene_biotype "protein_coding"; oId "ce:circAPBA2-48-001"; tissue "ce";
1	ncSplice	exon	141864767	141864952	.	-	.	gene_id "ENSMODG00000011835"; transcript_id "mdCircRNA-135"; exon_number "4" gene_name "APBA2"; gene_biotype "protein_coding"; oId "ce:circAPBA2-48-001"; tissue "ce";
1	ncSplice	exon	141872741	141872827	.	-	.	gene_id "ENSMODG00000011835"; transcript_id "mdCircRNA-135"; exon_number "5" gene_name "APBA2"; gene_biotype "protein_coding"; oId "ce:circAPBA2-48-001"; tissue "ce";
1	ncSplice	exon	141877639	141877674	.	-	.	gene_id "ENSMODG00000011835"; transcript_id "mdCircRNA-135"; exon_number "6" gene_name "APBA2"; gene_biotype "protein_coding"; oId "ce:circAPBA2-48-001"; tissue "ce";
1	ncSplice	exon	141881112	141881257	.	-	.	gene_id "ENSMODG00000011835"; transcript_id "mdCircRNA-135"; exon_number "7" gene_name "APBA2"; gene_biotype "protein_coding"; oId "ce:circAPBA2-48-001"; tissue "ce";
1	ncSplice	gene	142372875	142375922	.	-	.	gene_id "ENSMODG00000011784"; gene_name "MTMR10"; gene_source "ncSplice"; gene_biotype "protein_coding";
1	ncSplice	transcript	142372875	142375922	.	-	.	gene_id "ENSMODG00000011784"; transcript_id "mdCircRNA-136"; gene_name "MTMR10"; gene_biotype "protein_coding"; transcript_biotype "circRNA"; oId "ce:circMTMR10-51-001"; tissue "ce";
1	ncSplice	exon	142372875	142373017	.	-	.	gene_id "ENSMODG00000011784"; transcript_id "mdCircRNA-136"; exon_number "1" gene_name "MTMR10"; gene_biotype "protein_coding"; oId "ce:circMTMR10-51-001"; tissue "ce";
1	ncSplice	exon	142373216	142375922	.	-	.	gene_id "ENSMODG00000011784"; transcript_id "mdCircRNA-136"; exon_number "2" gene_name "MTMR10"; gene_biotype "protein_coding"; oId "ce:circMTMR10-51-001"; tissue "ce";
1	ncSplice	gene	146962250	146970354	.	-	.	gene_id "1:146962249:146970354:-1"; gene_name "1:146962249:146970354:-1"; gene_source "ncSplice"; gene_biotype "novel";
1	ncSplice	transcript	146962250	146970354	.	-	.	gene_id "1:146962249:146970354:-1"; transcript_id "mdCircRNA-137"; gene_name "1:146962249:146970354:-1"; gene_biotype "novel"; transcript_biotype "circRNA"; oId "ce:circ1:146962249:146970354:-1-52-001|ts:circ1:146962249:146970354:-1-114-001"; tissue "ce|ts";
1	ncSplice	exon	146962250	146962351	.	-	.	gene_id "1:146962249:146970354:-1"; transcript_id "mdCircRNA-137"; exon_number "1" gene_name "1:146962249:146970354:-1"; gene_biotype "novel"; oId "ce:circ1:146962249:146970354:-1-52-001|ts:circ1:146962249:146970354:-1-114-001"; tissue "ce|ts";
1	ncSplice	exon	146962789	146964531	.	-	.	gene_id "1:146962249:146970354:-1"; transcript_id "mdCircRNA-137"; exon_number "2" gene_name "1:146962249:146970354:-1"; gene_biotype "novel"; oId "ce:circ1:146962249:146970354:-1-52-001|ts:circ1:146962249:146970354:-1-114-001"; tissue "ce|ts";
1	ncSplice	exon	146970311	146970354	.	-	.	gene_id "1:146962249:146970354:-1"; transcript_id "mdCircRNA-137"; exon_number "3" gene_name "1:146962249:146970354:-1"; gene_biotype "novel"; oId "ce:circ1:146962249:146970354:-1-52-001|ts:circ1:146962249:146970354:-1-114-001"; tissue "ce|ts";
1	ncSplice	gene	169859017	169862137	.	-	.	gene_id "ENSMODG00000006606"; gene_name "NA"; gene_source "ncSplice"; gene_biotype "protein_coding";
1	ncSplice	transcript	169859017	169862137	.	-	.	gene_id "ENSMODG00000006606"; transcript_id "mdCircRNA-138"; gene_name "NA"; gene_biotype "protein_coding"; transcript_biotype "circRNA"; oId "ce:circNA-75-001"; tissue "ce";
1	ncSplice	exon	169859017	169859064	.	-	.	gene_id "ENSMODG00000006606"; transcript_id "mdCircRNA-138"; exon_number "1" gene_name "NA"; gene_biotype "protein_coding"; oId "ce:circNA-75-001"; tissue "ce";
1	ncSplice	exon	169859714	169859789	.	-	.	gene_id "ENSMODG00000006606"; transcript_id "mdCircRNA-138"; exon_number "2" gene_name "NA"; gene_biotype "protein_coding"; oId "ce:circNA-75-001"; tissue "ce";
1	ncSplice	exon	169861864	169862137	.	-	.	gene_id "ENSMODG00000006606"; transcript_id "mdCircRNA-138"; exon_number "3" gene_name "NA"; gene_biotype "protein_coding"; oId "ce:circNA-75-001"; tissue "ce";
1	ncSplice	gene	179740884	179747160	.	+	.	gene_id "ENSMODG00000002423"; gene_name "GALK2"; gene_source "ncSplice"; gene_biotype "protein_coding";
1	ncSplice	transcript	179740884	179747160	.	+	.	gene_id "ENSMODG00000002423"; transcript_id "mdCircRNA-139"; gene_name "GALK2"; gene_biotype "protein_coding"; transcript_biotype "circRNA"; oId "ce:circGALK2-80-001|ts:circGALK2-215-001"; tissue "ce|ts";
1	ncSplice	exon	179740884	179740982	.	+	.	gene_id "ENSMODG00000002423"; transcript_id "mdCircRNA-139"; exon_number "1" gene_name "GALK2"; gene_biotype "protein_coding"; oId "ce:circGALK2-80-001|ts:circGALK2-215-001"; tissue "ce|ts";
1	ncSplice	exon	179742017	179742169	.	+	.	gene_id "ENSMODG00000002423"; transcript_id "mdCircRNA-139"; exon_number "2" gene_name "GALK2"; gene_biotype "protein_coding"; oId "ce:circGALK2-80-001|ts:circGALK2-215-001"; tissue "ce|ts";
1	ncSplice	exon	179746950	179747160	.	+	.	gene_id "ENSMODG00000002423"; transcript_id "mdCircRNA-139"; exon_number "3" gene_name "GALK2"; gene_biotype "protein_coding"; oId "ce:circGALK2-80-001|ts:circGALK2-215-001"; tissue "ce|ts";
1	ncSplice	gene	182811713	182825279	.	-	.	gene_id "ENSMODG00000001979"; gene_name "LEO1"; gene_source "ncSplice"; gene_biotype "protein_coding";
1	ncSplice	transcript	182811713	182825279	.	-	.	gene_id "ENSMODG00000001979"; transcript_id "mdCircRNA-140"; gene_name "LEO1"; gene_biotype "protein_coding"; transcript_biotype "circRNA"; oId "ce:circLEO1-89-001"; tissue "ce";
1	ncSplice	exon	182811713	182811899	.	-	.	gene_id "ENSMODG00000001979"; transcript_id "mdCircRNA-140"; exon_number "1" gene_name "LEO1"; gene_biotype "protein_coding"; oId "ce:circLEO1-89-001"; tissue "ce";
1	ncSplice	exon	182814207	182814342	.	-	.	gene_id "ENSMODG00000001979"; transcript_id "mdCircRNA-140"; exon_number "2" gene_name "LEO1"; gene_biotype "protein_coding"; oId "ce:circLEO1-89-001"; tissue "ce";
1	ncSplice	exon	182819913	182820047	.	-	.	gene_id "ENSMODG00000001979"; transcript_id "mdCircRNA-140"; exon_number "3" gene_name "LEO1"; gene_biotype "protein_coding"; oId "ce:circLEO1-89-001"; tissue "ce";
1	ncSplice	exon	182820797	182820891	.	-	.	gene_id "ENSMODG00000001979"; transcript_id "mdCircRNA-140"; exon_number "4" gene_name "LEO1"; gene_biotype "protein_coding"; oId "ce:circLEO1-89-001"; tissue "ce";
1	ncSplice	exon	182825195	182825279	.	-	.	gene_id "ENSMODG00000001979"; transcript_id "mdCircRNA-140"; exon_number "5" gene_name "LEO1"; gene_biotype "protein_coding"; oId "ce:circLEO1-89-001"; tissue "ce";
1	ncSplice	gene	186211460	186245126	.	+	.	gene_id "ENSMODG00000001782"; gene_name "UNC13C"; gene_source "ncSplice"; gene_biotype "protein_coding";
1	ncSplice	transcript	186211460	186245126	.	+	.	gene_id "ENSMODG00000001782"; transcript_id "mdCircRNA-141"; gene_name "UNC13C"; gene_biotype "protein_coding"; transcript_biotype "circRNA"; oId "ce:circUNC13C-93-001"; tissue "ce";
1	ncSplice	exon	186211460	186211609	.	+	.	gene_id "ENSMODG00000001782"; transcript_id "mdCircRNA-141"; exon_number "1" gene_name "UNC13C"; gene_biotype "protein_coding"; oId "ce:circUNC13C-93-001"; tissue "ce";
1	ncSplice	exon	186223060	186223183	.	+	.	gene_id "ENSMODG00000001782"; transcript_id "mdCircRNA-141"; exon_number "2" gene_name "UNC13C"; gene_biotype "protein_coding"; oId "ce:circUNC13C-93-001"; tissue "ce";
1	ncSplice	exon	186225357	186225413	.	+	.	gene_id "ENSMODG00000001782"; transcript_id "mdCircRNA-141"; exon_number "3" gene_name "UNC13C"; gene_biotype "protein_coding"; oId "ce:circUNC13C-93-001"; tissue "ce";
1	ncSplice	exon	186234733	186234813	.	+	.	gene_id "ENSMODG00000001782"; transcript_id "mdCircRNA-141"; exon_number "4" gene_name "UNC13C"; gene_biotype "protein_coding"; oId "ce:circUNC13C-93-001"; tissue "ce";
1	ncSplice	exon	186244979	186245126	.	+	.	gene_id "ENSMODG00000001782"; transcript_id "mdCircRNA-141"; exon_number "5" gene_name "UNC13C"; gene_biotype "protein_coding"; oId "ce:circUNC13C-93-001"; tissue "ce";
1	ncSplice	gene	19350246	19363125	.	+	.	gene_id "ENSMODG00000009966"; gene_name "ARIH1"; gene_source "ncSplice"; gene_biotype "protein_coding";
1	ncSplice	transcript	19350246	19363125	.	+	.	gene_id "ENSMODG00000009966"; transcript_id "mdCircRNA-142"; gene_name "ARIH1"; gene_biotype "protein_coding"; transcript_biotype "circRNA"; oId "ce:circARIH1-100-001"; tissue "ce";
1	ncSplice	exon	19350246	19350390	.	+	.	gene_id "ENSMODG00000009966"; transcript_id "mdCircRNA-142"; exon_number "1" gene_name "ARIH1"; gene_biotype "protein_coding"; oId "ce:circARIH1-100-001"; tissue "ce";
1	ncSplice	exon	19355849	19355941	.	+	.	gene_id "ENSMODG00000009966"; transcript_id "mdCircRNA-142"; exon_number "2" gene_name "ARIH1"; gene_biotype "protein_coding"; oId "ce:circARIH1-100-001"; tissue "ce";
1	ncSplice	exon	19356476	19356531	.	+	.	gene_id "ENSMODG00000009966"; transcript_id "mdCircRNA-142"; exon_number "3" gene_name "ARIH1"; gene_biotype "protein_coding"; oId "ce:circARIH1-100-001"; tissue "ce";
1	ncSplice	exon	19361040	19361106	.	+	.	gene_id "ENSMODG00000009966"; transcript_id "mdCircRNA-142"; exon_number "4" gene_name "ARIH1"; gene_biotype "protein_coding"; oId "ce:circARIH1-100-001"; tissue "ce";
1	ncSplice	exon	19363019	19363125	.	+	.	gene_id "ENSMODG00000009966"; transcript_id "mdCircRNA-142"; exon_number "5" gene_name "ARIH1"; gene_biotype "protein_coding"; oId "ce:circARIH1-100-001"; tissue "ce";
1	ncSplice	gene	200847214	200862547	.	+	.	gene_id "ENSMODG00000017853"; gene_name "TMEM62"; gene_source "ncSplice"; gene_biotype "protein_coding";
1	ncSplice	transcript	200847214	200862547	.	+	.	gene_id "ENSMODG00000017853"; transcript_id "mdCircRNA-143"; gene_name "TMEM62"; gene_biotype "protein_coding"; transcript_biotype "circRNA"; oId "ce:circTMEM62-126-001|ts:circTMEM62-311-001"; tissue "ce|ts";
1	ncSplice	exon	200847214	200847355	.	+	.	gene_id "ENSMODG00000017853"; transcript_id "mdCircRNA-143"; exon_number "1" gene_name "TMEM62"; gene_biotype "protein_coding"; oId "ce:circTMEM62-126-001|ts:circTMEM62-311-001"; tissue "ce|ts";
1	ncSplice	exon	200848669	200848793	.	+	.	gene_id "ENSMODG00000017853"; transcript_id "mdCircRNA-143"; exon_number "2" gene_name "TMEM62"; gene_biotype "protein_coding"; oId "ce:circTMEM62-126-001|ts:circTMEM62-311-001"; tissue "ce|ts";
1	ncSplice	exon	200848913	200849035	.	+	.	gene_id "ENSMODG00000017853"; transcript_id "mdCircRNA-143"; exon_number "3" gene_name "TMEM62"; gene_biotype "protein_coding"; oId "ce:circTMEM62-126-001|ts:circTMEM62-311-001"; tissue "ce|ts";
1	ncSplice	exon	200862392	200862547	.	+	.	gene_id "ENSMODG00000017853"; transcript_id "mdCircRNA-143"; exon_number "4" gene_name "TMEM62"; gene_biotype "protein_coding"; oId "ce:circTMEM62-126-001|ts:circTMEM62-311-001"; tissue "ce|ts";
1	ncSplice	gene	201383641	201392440	.	-	.	gene_id "ENSMODG00000017806"; gene_name "TP53BP1"; gene_source "ncSplice"; gene_biotype "protein_coding";
1	ncSplice	transcript	201383641	201392440	.	-	.	gene_id "ENSMODG00000017806"; transcript_id "mdCircRNA-144"; gene_name "TP53BP1"; gene_biotype "protein_coding"; transcript_biotype "circRNA"; oId "ce:circTP53BP1-131-001"; tissue "ce";
1	ncSplice	exon	201383641	201383733	.	-	.	gene_id "ENSMODG00000017806"; transcript_id "mdCircRNA-144"; exon_number "1" gene_name "TP53BP1"; gene_biotype "protein_coding"; oId "ce:circTP53BP1-131-001"; tissue "ce";
1	ncSplice	exon	201385811	201385868	.	-	.	gene_id "ENSMODG00000017806"; transcript_id "mdCircRNA-144"; exon_number "2" gene_name "TP53BP1"; gene_biotype "protein_coding"; oId "ce:circTP53BP1-131-001"; tissue "ce";
1	ncSplice	exon	201391096	201391284	.	-	.	gene_id "ENSMODG00000017806"; transcript_id "mdCircRNA-144"; exon_number "3" gene_name "TP53BP1"; gene_biotype "protein_coding"; oId "ce:circTP53BP1-131-001"; tissue "ce";
1	ncSplice	exon	201392321	201392440	.	-	.	gene_id "ENSMODG00000017806"; transcript_id "mdCircRNA-144"; exon_number "4" gene_name "TP53BP1"; gene_biotype "protein_coding"; oId "ce:circTP53BP1-131-001"; tissue "ce";
1	ncSplice	gene	202373255	202375764	.	+	.	gene_id "ENSMODG00000017721"; gene_name "CASC4"; gene_source "ncSplice"; gene_biotype "protein_coding";
1	ncSplice	transcript	202373255	202375764	.	+	.	gene_id "ENSMODG00000017721"; transcript_id "mdCircRNA-145"; gene_name "CASC4"; gene_biotype "protein_coding"; transcript_biotype "circRNA"; oId "ce:circCASC4-134-001|ts:circCASC4-324-001"; tissue "ce|ts";
1	ncSplice	exon	202373255	202373353	.	+	.	gene_id "ENSMODG00000017721"; transcript_id "mdCircRNA-145"; exon_number "1" gene_name "CASC4"; gene_biotype "protein_coding"; oId "ce:circCASC4-134-001|ts:circCASC4-324-001"; tissue "ce|ts";
1	ncSplice	exon	202375588	202375764	.	+	.	gene_id "ENSMODG00000017721"; transcript_id "mdCircRNA-145"; exon_number "2" gene_name "CASC4"; gene_biotype "protein_coding"; oId "ce:circCASC4-134-001|ts:circCASC4-324-001"; tissue "ce|ts";
1	ncSplice	gene	218643767	218644756	.	-	.	gene_id "ENSMODG00000001994"; gene_name "TRIP11"; gene_source "ncSplice"; gene_biotype "protein_coding";
1	ncSplice	transcript	218643767	218644756	.	-	.	gene_id "ENSMODG00000001994"; transcript_id "mdCircRNA-146"; gene_name "TRIP11"; gene_biotype "protein_coding"; transcript_biotype "circRNA"; oId "ce:circTRIP11-146-001"; tissue "ce";
1	ncSplice	exon	218643767	218643881	.	-	.	gene_id "ENSMODG00000001994"; transcript_id "mdCircRNA-146"; exon_number "1" gene_name "TRIP11"; gene_biotype "protein_coding"; oId "ce:circTRIP11-146-001"; tissue "ce";
1	ncSplice	exon	218644675	218644756	.	-	.	gene_id "ENSMODG00000001994"; transcript_id "mdCircRNA-146"; exon_number "2" gene_name "TRIP11"; gene_biotype "protein_coding"; oId "ce:circTRIP11-146-001"; tissue "ce";
1	ncSplice	gene	223229044	223251782	.	+	.	gene_id "ENSMODG00000002678"; gene_name "NA"; gene_source "ncSplice"; gene_biotype "protein_coding";
1	ncSplice	transcript	223229044	223251782	.	+	.	gene_id "ENSMODG00000002678"; transcript_id "mdCircRNA-147"; gene_name "NA"; gene_biotype "protein_coding"; transcript_biotype "circRNA"; oId "ce:circNA-158-001"; tissue "ce";
1	ncSplice	exon	223229044	223229122	.	+	.	gene_id "ENSMODG00000002678"; transcript_id "mdCircRNA-147"; exon_number "1" gene_name "NA"; gene_biotype "protein_coding"; oId "ce:circNA-158-001"; tissue "ce";
1	ncSplice	exon	223238370	223238542	.	+	.	gene_id "ENSMODG00000002678"; transcript_id "mdCircRNA-147"; exon_number "2" gene_name "NA"; gene_biotype "protein_coding"; oId "ce:circNA-158-001"; tissue "ce";
1	ncSplice	exon	223244793	223244856	.	+	.	gene_id "ENSMODG00000002678"; transcript_id "mdCircRNA-147"; exon_number "3" gene_name "NA"; gene_biotype "protein_coding"; oId "ce:circNA-158-001"; tissue "ce";
1	ncSplice	exon	223251645	223251782	.	+	.	gene_id "ENSMODG00000002678"; transcript_id "mdCircRNA-147"; exon_number "4" gene_name "NA"; gene_biotype "protein_coding"; oId "ce:circNA-158-001"; tissue "ce";
1	ncSplice	gene	226745851	226746407	.	+	.	gene_id "ENSMODG00000003001"; gene_name "FOXN3"; gene_source "ncSplice"; gene_biotype "protein_coding";
1	ncSplice	transcript	226745851	226746407	.	+	.	gene_id "ENSMODG00000003001"; transcript_id "mdCircRNA-148"; gene_name "FOXN3"; gene_biotype "protein_coding"; transcript_biotype "circRNA"; oId "ce:circFOXN3-163-001"; tissue "ce";
1	ncSplice	exon	226745851	226746069	.	+	.	gene_id "ENSMODG00000003001"; transcript_id "mdCircRNA-148"; exon_number "1" gene_name "FOXN3"; gene_biotype "protein_coding"; oId "ce:circFOXN3-163-001"; tissue "ce";
1	ncSplice	exon	226746224	226746407	.	+	.	gene_id "ENSMODG00000003001"; transcript_id "mdCircRNA-148"; exon_number "2" gene_name "FOXN3"; gene_biotype "protein_coding"; oId "ce:circFOXN3-163-001"; tissue "ce";
1	ncSplice	gene	227919663	227983948	.	-	.	gene_id "ENSMODG00000024048"; gene_name "SPATA7"; gene_source "ncSplice"; gene_biotype "protein_coding";
1	ncSplice	transcript	227919663	227983948	.	-	.	gene_id "ENSMODG00000024048"; transcript_id "mdCircRNA-149"; gene_name "SPATA7"; gene_biotype "protein_coding"; transcript_biotype "circRNA"; oId "ce:circSPATA7-169-001"; tissue "ce";
1	ncSplice	exon	227919663	227919726	.	-	.	gene_id "ENSMODG00000024048"; transcript_id "mdCircRNA-149"; exon_number "1" gene_name "SPATA7"; gene_biotype "protein_coding"; oId "ce:circSPATA7-169-001"; tissue "ce";
1	ncSplice	exon	227921909	227922369	.	-	.	gene_id "ENSMODG00000024048"; transcript_id "mdCircRNA-149"; exon_number "2" gene_name "SPATA7"; gene_biotype "protein_coding"; oId "ce:circSPATA7-169-001"; tissue "ce";
1	ncSplice	exon	227955472	227955605	.	-	.	gene_id "ENSMODG00000024048"; transcript_id "mdCircRNA-149"; exon_number "3" gene_name "SPATA7"; gene_biotype "protein_coding"; oId "ce:circSPATA7-169-001"; tissue "ce";
1	ncSplice	exon	227978934	227978981	.	-	.	gene_id "ENSMODG00000024048"; transcript_id "mdCircRNA-149"; exon_number "4" gene_name "SPATA7"; gene_biotype "protein_coding"; oId "ce:circSPATA7-169-001"; tissue "ce";
1	ncSplice	exon	227982371	227982466	.	-	.	gene_id "ENSMODG00000024048"; transcript_id "mdCircRNA-149"; exon_number "5" gene_name "SPATA7"; gene_biotype "protein_coding"; oId "ce:circSPATA7-169-001"; tissue "ce";
1	ncSplice	exon	227983874	227983948	.	-	.	gene_id "ENSMODG00000024048"; transcript_id "mdCircRNA-149"; exon_number "6" gene_name "SPATA7"; gene_biotype "protein_coding"; oId "ce:circSPATA7-169-001"; tissue "ce";
1	ncSplice	gene	245248298	245254940	.	-	.	gene_id "ENSMODG00000005511"; gene_name "TMEM63C"; gene_source "ncSplice"; gene_biotype "protein_coding";
1	ncSplice	transcript	245248298	245254940	.	-	.	gene_id "ENSMODG00000005511"; transcript_id "mdCircRNA-150"; gene_name "TMEM63C"; gene_biotype "protein_coding"; transcript_biotype "circRNA"; oId "ce:circTMEM63C-181-001|ts:circTMEM63C-469-001"; tissue "ce|ts";
1	ncSplice	exon	245248298	245248431	.	-	.	gene_id "ENSMODG00000005511"; transcript_id "mdCircRNA-150"; exon_number "1" gene_name "TMEM63C"; gene_biotype "protein_coding"; oId "ce:circTMEM63C-181-001|ts:circTMEM63C-469-001"; tissue "ce|ts";
1	ncSplice	exon	245248928	245249051	.	-	.	gene_id "ENSMODG00000005511"; transcript_id "mdCircRNA-150"; exon_number "2" gene_name "TMEM63C"; gene_biotype "protein_coding"; oId "ce:circTMEM63C-181-001|ts:circTMEM63C-469-001"; tissue "ce|ts";
1	ncSplice	exon	245249189	245249269	.	-	.	gene_id "ENSMODG00000005511"; transcript_id "mdCircRNA-150"; exon_number "3" gene_name "TMEM63C"; gene_biotype "protein_coding"; oId "ce:circTMEM63C-181-001|ts:circTMEM63C-469-001"; tissue "ce|ts";
1	ncSplice	exon	245250093	245250166	.	-	.	gene_id "ENSMODG00000005511"; transcript_id "mdCircRNA-150"; exon_number "4" gene_name "TMEM63C"; gene_biotype "protein_coding"; oId "ce:circTMEM63C-181-001|ts:circTMEM63C-469-001"; tissue "ce|ts";
1	ncSplice	exon	245254835	245254940	.	-	.	gene_id "ENSMODG00000005511"; transcript_id "mdCircRNA-150"; exon_number "5" gene_name "TMEM63C"; gene_biotype "protein_coding"; oId "ce:circTMEM63C-181-001|ts:circTMEM63C-469-001"; tissue "ce|ts";
1	ncSplice	gene	245279102	245287167	.	-	.	gene_id "ENSMODG00000005511"; gene_name "TMEM63C"; gene_source "ncSplice"; gene_biotype "protein_coding";
1	ncSplice	transcript	245279102	245287167	.	-	.	gene_id "ENSMODG00000005511"; transcript_id "mdCircRNA-151"; gene_name "TMEM63C"; gene_biotype "protein_coding"; transcript_biotype "circRNA"; oId "ce:circTMEM63C-183-001"; tissue "ce";
1	ncSplice	exon	245279102	245279139	.	-	.	gene_id "ENSMODG00000005511"; transcript_id "mdCircRNA-151"; exon_number "1" gene_name "TMEM63C"; gene_biotype "protein_coding"; oId "ce:circTMEM63C-183-001"; tissue "ce";
1	ncSplice	exon	245283385	245283472	.	-	.	gene_id "ENSMODG00000005511"; transcript_id "mdCircRNA-151"; exon_number "2" gene_name "TMEM63C"; gene_biotype "protein_coding"; oId "ce:circTMEM63C-183-001"; tissue "ce";
1	ncSplice	exon	245285305	245285384	.	-	.	gene_id "ENSMODG00000005511"; transcript_id "mdCircRNA-151"; exon_number "3" gene_name "TMEM63C"; gene_biotype "protein_coding"; oId "ce:circTMEM63C-183-001"; tissue "ce";
1	ncSplice	exon	245286952	245287167	.	-	.	gene_id "ENSMODG00000005511"; transcript_id "mdCircRNA-151"; exon_number "4" gene_name "TMEM63C"; gene_biotype "protein_coding"; oId "ce:circTMEM63C-183-001"; tissue "ce";
1	ncSplice	gene	247306650	247327750	.	-	.	gene_id "ENSMODG00000005740"; gene_name "TTLL5"; gene_source "ncSplice"; gene_biotype "protein_coding";
1	ncSplice	transcript	247306650	247327750	.	-	.	gene_id "ENSMODG00000005740"; transcript_id "mdCircRNA-152"; gene_name "TTLL5"; gene_biotype "protein_coding"; transcript_biotype "circRNA"; oId "ce:circTTLL5-195-001|ts:circTTLL5-497-002"; tissue "ce|ts";
1	ncSplice	exon	247306650	247306757	.	-	.	gene_id "ENSMODG00000005740"; transcript_id "mdCircRNA-152"; exon_number "1" gene_name "TTLL5"; gene_biotype "protein_coding"; oId "ce:circTTLL5-195-001|ts:circTTLL5-497-002"; tissue "ce|ts";
1	ncSplice	exon	247308050	247308141	.	-	.	gene_id "ENSMODG00000005740"; transcript_id "mdCircRNA-152"; exon_number "2" gene_name "TTLL5"; gene_biotype "protein_coding"; oId "ce:circTTLL5-195-001|ts:circTTLL5-497-002"; tissue "ce|ts";
1	ncSplice	exon	247310018	247310119	.	-	.	gene_id "ENSMODG00000005740"; transcript_id "mdCircRNA-152"; exon_number "3" gene_name "TTLL5"; gene_biotype "protein_coding"; oId "ce:circTTLL5-195-001|ts:circTTLL5-497-002"; tissue "ce|ts";
1	ncSplice	exon	247327335	247327419	.	-	.	gene_id "ENSMODG00000005740"; transcript_id "mdCircRNA-152"; exon_number "4" gene_name "TTLL5"; gene_biotype "protein_coding"; oId "ce:circTTLL5-195-001|ts:circTTLL5-497-002"; tissue "ce|ts";
1	ncSplice	exon	247327681	247327750	.	-	.	gene_id "ENSMODG00000005740"; transcript_id "mdCircRNA-152"; exon_number "5" gene_name "TTLL5"; gene_biotype "protein_coding"; oId "ce:circTTLL5-195-001|ts:circTTLL5-497-002"; tissue "ce|ts";
1	ncSplice	gene	259320472	259340409	.	+	.	gene_id "ENSMODG00000007881"; gene_name "ARID4A"; gene_source "ncSplice"; gene_biotype "protein_coding";
1	ncSplice	transcript	259320472	259340409	.	+	.	gene_id "ENSMODG00000007881"; transcript_id "mdCircRNA-153"; gene_name "ARID4A"; gene_biotype "protein_coding"; transcript_biotype "circRNA"; oId "ce:circARID4A-217-001"; tissue "ce";
1	ncSplice	exon	259320472	259320537	.	+	.	gene_id "ENSMODG00000007881"; transcript_id "mdCircRNA-153"; exon_number "1" gene_name "ARID4A"; gene_biotype "protein_coding"; oId "ce:circARID4A-217-001"; tissue "ce";
1	ncSplice	exon	259322193	259322283	.	+	.	gene_id "ENSMODG00000007881"; transcript_id "mdCircRNA-153"; exon_number "2" gene_name "ARID4A"; gene_biotype "protein_coding"; oId "ce:circARID4A-217-001"; tissue "ce";
1	ncSplice	exon	259338610	259338689	.	+	.	gene_id "ENSMODG00000007881"; transcript_id "mdCircRNA-153"; exon_number "3" gene_name "ARID4A"; gene_biotype "protein_coding"; oId "ce:circARID4A-217-001"; tissue "ce";
1	ncSplice	exon	259338771	259338865	.	+	.	gene_id "ENSMODG00000007881"; transcript_id "mdCircRNA-153"; exon_number "4" gene_name "ARID4A"; gene_biotype "protein_coding"; oId "ce:circARID4A-217-001"; tissue "ce";
1	ncSplice	exon	259340277	259340409	.	+	.	gene_id "ENSMODG00000007881"; transcript_id "mdCircRNA-153"; exon_number "5" gene_name "ARID4A"; gene_biotype "protein_coding"; oId "ce:circARID4A-217-001"; tissue "ce";
1	ncSplice	gene	268796110	268796509	.	+	.	gene_id "ENSMODG00000009731"; gene_name "NA"; gene_source "ncSplice"; gene_biotype "protein_coding";
1	ncSplice	transcript	268796110	268796509	.	+	.	gene_id "ENSMODG00000009731"; transcript_id "mdCircRNA-154"; gene_name "NA"; gene_biotype "protein_coding"; transcript_biotype "circRNA"; oId "ce:circNA-232-001|ts:circNA-565-001"; tissue "ce|ts";
1	ncSplice	exon	268796110	268796225	.	+	.	gene_id "ENSMODG00000009731"; transcript_id "mdCircRNA-154"; exon_number "1" gene_name "NA"; gene_biotype "protein_coding"; oId "ce:circNA-232-001|ts:circNA-565-001"; tissue "ce|ts";
1	ncSplice	exon	268796344	268796509	.	+	.	gene_id "ENSMODG00000009731"; transcript_id "mdCircRNA-154"; exon_number "2" gene_name "NA"; gene_biotype "protein_coding"; oId "ce:circNA-232-001|ts:circNA-565-001"; tissue "ce|ts";
1	ncSplice	gene	268826539	268860751	.	+	.	gene_id "ENSMODG00000009731"; gene_name "NA"; gene_source "ncSplice"; gene_biotype "protein_coding";
1	ncSplice	transcript	268826539	268860751	.	+	.	gene_id "ENSMODG00000009731"; transcript_id "mdCircRNA-155"; gene_name "NA"; gene_biotype "protein_coding"; transcript_biotype "circRNA"; oId "ce:circNA-233-001|ts:circNA-566-001"; tissue "ce|ts";
1	ncSplice	exon	268826539	268826653	.	+	.	gene_id "ENSMODG00000009731"; transcript_id "mdCircRNA-155"; exon_number "1" gene_name "NA"; gene_biotype "protein_coding"; oId "ce:circNA-233-001|ts:circNA-566-001"; tissue "ce|ts";
1	ncSplice	exon	268860514	268860751	.	+	.	gene_id "ENSMODG00000009731"; transcript_id "mdCircRNA-155"; exon_number "2" gene_name "NA"; gene_biotype "protein_coding"; oId "ce:circNA-233-001|ts:circNA-566-001"; tissue "ce|ts";
1	ncSplice	gene	281949181	281950955	.	+	.	gene_id "ENSMODG00000013105"; gene_name "SAV1"; gene_source "ncSplice"; gene_biotype "protein_coding";
1	ncSplice	transcript	281949181	281950955	.	+	.	gene_id "ENSMODG00000013105"; transcript_id "mdCircRNA-156"; gene_name "SAV1"; gene_biotype "protein_coding"; transcript_biotype "circRNA"; oId "ce:circSAV1-255-001"; tissue "ce";
1	ncSplice	exon	281949181	281949448	.	+	.	gene_id "ENSMODG00000013105"; transcript_id "mdCircRNA-156"; exon_number "1" gene_name "SAV1"; gene_biotype "protein_coding"; oId "ce:circSAV1-255-001"; tissue "ce";
1	ncSplice	exon	281950812	281950955	.	+	.	gene_id "ENSMODG00000013105"; transcript_id "mdCircRNA-156"; exon_number "2" gene_name "SAV1"; gene_biotype "protein_coding"; oId "ce:circSAV1-255-001"; tissue "ce";
1	ncSplice	gene	286102855	286106141	.	-	.	gene_id "ENSMODG00000012779"; gene_name "RALGAPA1"; gene_source "ncSplice"; gene_biotype "protein_coding";
1	ncSplice	transcript	286102855	286106141	.	-	.	gene_id "ENSMODG00000012779"; transcript_id "mdCircRNA-157"; gene_name "RALGAPA1"; gene_biotype "protein_coding"; transcript_biotype "circRNA"; oId "ce:circRALGAPA1-264-001|ts:circRALGAPA1-631-001"; tissue "ce|ts";
1	ncSplice	exon	286102855	286102926	.	-	.	gene_id "ENSMODG00000012779"; transcript_id "mdCircRNA-157"; exon_number "1" gene_name "RALGAPA1"; gene_biotype "protein_coding"; oId "ce:circRALGAPA1-264-001|ts:circRALGAPA1-631-001"; tissue "ce|ts";
1	ncSplice	exon	286105277	286106141	.	-	.	gene_id "ENSMODG00000012779"; transcript_id "mdCircRNA-157"; exon_number "2" gene_name "RALGAPA1"; gene_biotype "protein_coding"; oId "ce:circRALGAPA1-264-001|ts:circRALGAPA1-631-001"; tissue "ce|ts";
1	ncSplice	gene	286414095	286437512	.	+	.	gene_id "ENSMODG00000012750"; gene_name "BRMS1L"; gene_source "ncSplice"; gene_biotype "protein_coding";
1	ncSplice	transcript	286414095	286437512	.	+	.	gene_id "ENSMODG00000012750"; transcript_id "mdCircRNA-158"; gene_name "BRMS1L"; gene_biotype "protein_coding"; transcript_biotype "circRNA"; oId "ce:circBRMS1L-271-001"; tissue "ce";
1	ncSplice	exon	286414095	286420463	.	+	.	gene_id "ENSMODG00000012750"; transcript_id "mdCircRNA-158"; exon_number "1" gene_name "BRMS1L"; gene_biotype "protein_coding"; oId "ce:circBRMS1L-271-001"; tissue "ce";
1	ncSplice	exon	286437433	286437512	.	+	.	gene_id "ENSMODG00000012750"; transcript_id "mdCircRNA-158"; exon_number "2" gene_name "BRMS1L"; gene_biotype "protein_coding"; oId "ce:circBRMS1L-271-001"; tissue "ce";
1	ncSplice	gene	296702954	296720001	.	+	.	gene_id "ENSMODG00000014669"; gene_name "PACS2"; gene_source "ncSplice"; gene_biotype "protein_coding";
1	ncSplice	transcript	296702954	296720001	.	+	.	gene_id "ENSMODG00000014669"; transcript_id "mdCircRNA-159"; gene_name "PACS2"; gene_biotype "protein_coding"; transcript_biotype "circRNA"; oId "ce:circPACS2-285-001"; tissue "ce";
1	ncSplice	exon	296702954	296702996	.	+	.	gene_id "ENSMODG00000014669"; transcript_id "mdCircRNA-159"; exon_number "1" gene_name "PACS2"; gene_biotype "protein_coding"; oId "ce:circPACS2-285-001"; tissue "ce";
1	ncSplice	exon	296705989	296706031	.	+	.	gene_id "ENSMODG00000014669"; transcript_id "mdCircRNA-159"; exon_number "2" gene_name "PACS2"; gene_biotype "protein_coding"; oId "ce:circPACS2-285-001"; tissue "ce";
1	ncSplice	exon	296707156	296707291	.	+	.	gene_id "ENSMODG00000014669"; transcript_id "mdCircRNA-159"; exon_number "3" gene_name "PACS2"; gene_biotype "protein_coding"; oId "ce:circPACS2-285-001"; tissue "ce";
1	ncSplice	exon	296719775	296720001	.	+	.	gene_id "ENSMODG00000014669"; transcript_id "mdCircRNA-159"; exon_number "4" gene_name "PACS2"; gene_biotype "protein_coding"; oId "ce:circPACS2-285-001"; tissue "ce";
1	ncSplice	gene	325498785	325500692	.	+	.	gene_id "ENSMODG00000012812"; gene_name "ATG2B"; gene_source "ncSplice"; gene_biotype "protein_coding";
1	ncSplice	transcript	325498785	325500692	.	+	.	gene_id "ENSMODG00000012812"; transcript_id "mdCircRNA-160"; gene_name "ATG2B"; gene_biotype "protein_coding"; transcript_biotype "circRNA"; oId "ce:circATG2B-324-001|ts:circATG2B-784-001"; tissue "ce|ts";
1	ncSplice	exon	325498785	325499058	.	+	.	gene_id "ENSMODG00000012812"; transcript_id "mdCircRNA-160"; exon_number "1" gene_name "ATG2B"; gene_biotype "protein_coding"; oId "ce:circATG2B-324-001|ts:circATG2B-784-001"; tissue "ce|ts";
1	ncSplice	exon	325500590	325500692	.	+	.	gene_id "ENSMODG00000012812"; transcript_id "mdCircRNA-160"; exon_number "2" gene_name "ATG2B"; gene_biotype "protein_coding"; oId "ce:circATG2B-324-001|ts:circATG2B-784-001"; tissue "ce|ts";
1	ncSplice	gene	331310275	331311635	.	+	.	gene_id "ENSMODG00000011765"; gene_name "PSD2"; gene_source "ncSplice"; gene_biotype "protein_coding";
1	ncSplice	transcript	331310275	331311635	.	+	.	gene_id "ENSMODG00000011765"; transcript_id "mdCircRNA-161"; gene_name "PSD2"; gene_biotype "protein_coding"; transcript_biotype "circRNA"; oId "ce:circPSD2-336-001"; tissue "ce";
1	ncSplice	exon	331310275	331310333	.	+	.	gene_id "ENSMODG00000011765"; transcript_id "mdCircRNA-161"; exon_number "1" gene_name "PSD2"; gene_biotype "protein_coding"; oId "ce:circPSD2-336-001"; tissue "ce";
1	ncSplice	exon	331311633	331311635	.	+	.	gene_id "ENSMODG00000011765"; transcript_id "mdCircRNA-161"; exon_number "2" gene_name "PSD2"; gene_biotype "protein_coding"; oId "ce:circPSD2-336-001"; tissue "ce";
1	ncSplice	gene	335296233	335338703	.	+	.	gene_id "ENSMODG00000010362"; gene_name "ARHGAP26"; gene_source "ncSplice"; gene_biotype "protein_coding";
1	ncSplice	transcript	335296233	335338703	.	+	.	gene_id "ENSMODG00000010362"; transcript_id "mdCircRNA-162"; gene_name "ARHGAP26"; gene_biotype "protein_coding"; transcript_biotype "circRNA"; oId "ce:circARHGAP26-347-001"; tissue "ce";
1	ncSplice	exon	335296233	335296392	.	+	.	gene_id "ENSMODG00000010362"; transcript_id "mdCircRNA-162"; exon_number "1" gene_name "ARHGAP26"; gene_biotype "protein_coding"; oId "ce:circARHGAP26-347-001"; tissue "ce";
1	ncSplice	exon	335318874	335319012	.	+	.	gene_id "ENSMODG00000010362"; transcript_id "mdCircRNA-162"; exon_number "2" gene_name "ARHGAP26"; gene_biotype "protein_coding"; oId "ce:circARHGAP26-347-001"; tissue "ce";
1	ncSplice	exon	335338550	335338703	.	+	.	gene_id "ENSMODG00000010362"; transcript_id "mdCircRNA-162"; exon_number "3" gene_name "ARHGAP26"; gene_biotype "protein_coding"; oId "ce:circARHGAP26-347-001"; tissue "ce";
1	ncSplice	gene	387421841	387422684	.	+	.	gene_id "ENSMODG00000002819"; gene_name "NA"; gene_source "ncSplice"; gene_biotype "protein_coding";
1	ncSplice	transcript	387421841	387422684	.	+	.	gene_id "ENSMODG00000002819"; transcript_id "mdCircRNA-163"; gene_name "NA"; gene_biotype "protein_coding"; transcript_biotype "circRNA"; oId "ce:circNA-386-001"; tissue "ce";
1	ncSplice	exon	387421841	387421954	.	+	.	gene_id "ENSMODG00000002819"; transcript_id "mdCircRNA-163"; exon_number "1" gene_name "NA"; gene_biotype "protein_coding"; oId "ce:circNA-386-001"; tissue "ce";
1	ncSplice	exon	387422545	387422684	.	+	.	gene_id "ENSMODG00000002819"; transcript_id "mdCircRNA-163"; exon_number "2" gene_name "NA"; gene_biotype "protein_coding"; oId "ce:circNA-386-001"; tissue "ce";
1	ncSplice	gene	389544255	389545322	.	+	.	gene_id "ENSMODG00000001490"; gene_name "EPB41L1"; gene_source "ncSplice"; gene_biotype "protein_coding";
1	ncSplice	transcript	389544255	389545322	.	+	.	gene_id "ENSMODG00000001490"; transcript_id "mdCircRNA-164"; gene_name "EPB41L1"; gene_biotype "protein_coding"; transcript_biotype "circRNA"; oId "ce:circEPB41L1-400-001|ts:circEPB41L1-949-001"; tissue "ce|ts";
1	ncSplice	exon	389544255	389544419	.	+	.	gene_id "ENSMODG00000001490"; transcript_id "mdCircRNA-164"; exon_number "1" gene_name "EPB41L1"; gene_biotype "protein_coding"; oId "ce:circEPB41L1-400-001|ts:circEPB41L1-949-001"; tissue "ce|ts";
1	ncSplice	exon	389545218	389545322	.	+	.	gene_id "ENSMODG00000001490"; transcript_id "mdCircRNA-164"; exon_number "2" gene_name "EPB41L1"; gene_biotype "protein_coding"; oId "ce:circEPB41L1-400-001|ts:circEPB41L1-949-001"; tissue "ce|ts";
1	ncSplice	gene	393532560	393548080	.	+	.	gene_id "1:393532559:393548080:1"; gene_name "1:393532559:393548080:1"; gene_source "ncSplice"; gene_biotype "novel";
1	ncSplice	transcript	393532560	393548080	.	+	.	gene_id "1:393532559:393548080:1"; transcript_id "mdCircRNA-165"; gene_name "1:393532559:393548080:1"; gene_biotype "novel"; transcript_biotype "circRNA"; oId "ce:circ1:393532559:393548080:1-403-001|ts:circ1:393532559:393548080:1-960-001"; tissue "ce|ts";
1	ncSplice	exon	393532560	393544384	.	+	.	gene_id "1:393532559:393548080:1"; transcript_id "mdCircRNA-165"; exon_number "1" gene_name "1:393532559:393548080:1"; gene_biotype "novel"; oId "ce:circ1:393532559:393548080:1-403-001|ts:circ1:393532559:393548080:1-960-001"; tissue "ce|ts";
1	ncSplice	exon	393547953	393548080	.	+	.	gene_id "1:393532559:393548080:1"; transcript_id "mdCircRNA-165"; exon_number "2" gene_name "1:393532559:393548080:1"; gene_biotype "novel"; oId "ce:circ1:393532559:393548080:1-403-001|ts:circ1:393532559:393548080:1-960-001"; tissue "ce|ts";
1	ncSplice	gene	393532560	393569516	.	+	.	gene_id "1:393532559:393569516:1"; gene_name "1:393532559:393569516:1"; gene_source "ncSplice"; gene_biotype "novel";
1	ncSplice	transcript	393532560	393569516	.	+	.	gene_id "1:393532559:393569516:1"; transcript_id "mdCircRNA-166"; gene_name "1:393532559:393569516:1"; gene_biotype "novel"; transcript_biotype "circRNA"; oId "ce:circ1:393532559:393569516:1-404-001"; tissue "ce";
1	ncSplice	exon	393532560	393544384	.	+	.	gene_id "1:393532559:393569516:1"; transcript_id "mdCircRNA-166"; exon_number "1" gene_name "1:393532559:393569516:1"; gene_biotype "novel"; oId "ce:circ1:393532559:393569516:1-404-001"; tissue "ce";
1	ncSplice	exon	393547953	393569516	.	+	.	gene_id "1:393532559:393569516:1"; transcript_id "mdCircRNA-166"; exon_number "2" gene_name "1:393532559:393569516:1"; gene_biotype "novel"; oId "ce:circ1:393532559:393569516:1-404-001"; tissue "ce";
1	ncSplice	gene	415394309	415400478	.	-	.	gene_id "ENSMODG00000019671"; gene_name "TTLL11"; gene_source "ncSplice"; gene_biotype "protein_coding";
1	ncSplice	transcript	415394309	415400478	.	-	.	gene_id "ENSMODG00000019671"; transcript_id "mdCircRNA-167"; gene_name "TTLL11"; gene_biotype "protein_coding"; transcript_biotype "circRNA"; oId "ce:circTTLL11-424-001"; tissue "ce";
1	ncSplice	exon	415394309	415394427	.	-	.	gene_id "ENSMODG00000019671"; transcript_id "mdCircRNA-167"; exon_number "1" gene_name "TTLL11"; gene_biotype "protein_coding"; oId "ce:circTTLL11-424-001"; tissue "ce";
1	ncSplice	exon	415397344	415397439	.	-	.	gene_id "ENSMODG00000019671"; transcript_id "mdCircRNA-167"; exon_number "2" gene_name "TTLL11"; gene_biotype "protein_coding"; oId "ce:circTTLL11-424-001"; tissue "ce";
1	ncSplice	exon	415399903	415400478	.	-	.	gene_id "ENSMODG00000019671"; transcript_id "mdCircRNA-167"; exon_number "3" gene_name "TTLL11"; gene_biotype "protein_coding"; oId "ce:circTTLL11-424-001"; tissue "ce";
1	ncSplice	gene	419480815	419502498	.	-	.	gene_id "ENSMODG00000019758"; gene_name "GOLGA1"; gene_source "ncSplice"; gene_biotype "protein_coding";
1	ncSplice	transcript	419480815	419502498	.	-	.	gene_id "ENSMODG00000019758"; transcript_id "mdCircRNA-168"; gene_name "GOLGA1"; gene_biotype "protein_coding"; transcript_biotype "circRNA"; oId "ce:circGOLGA1-432-001"; tissue "ce";
1	ncSplice	exon	419480815	419480910	.	-	.	gene_id "ENSMODG00000019758"; transcript_id "mdCircRNA-168"; exon_number "1" gene_name "GOLGA1"; gene_biotype "protein_coding"; oId "ce:circGOLGA1-432-001"; tissue "ce";
1	ncSplice	exon	419482501	419482596	.	-	.	gene_id "ENSMODG00000019758"; transcript_id "mdCircRNA-168"; exon_number "2" gene_name "GOLGA1"; gene_biotype "protein_coding"; oId "ce:circGOLGA1-432-001"; tissue "ce";
1	ncSplice	exon	419483825	419483950	.	-	.	gene_id "ENSMODG00000019758"; transcript_id "mdCircRNA-168"; exon_number "3" gene_name "GOLGA1"; gene_biotype "protein_coding"; oId "ce:circGOLGA1-432-001"; tissue "ce";
1	ncSplice	exon	419497864	419497975	.	-	.	gene_id "ENSMODG00000019758"; transcript_id "mdCircRNA-168"; exon_number "4" gene_name "GOLGA1"; gene_biotype "protein_coding"; oId "ce:circGOLGA1-432-001"; tissue "ce";
1	ncSplice	exon	419498462	419498631	.	-	.	gene_id "ENSMODG00000019758"; transcript_id "mdCircRNA-168"; exon_number "5" gene_name "GOLGA1"; gene_biotype "protein_coding"; oId "ce:circGOLGA1-432-001"; tissue "ce";
1	ncSplice	exon	419498747	419498875	.	-	.	gene_id "ENSMODG00000019758"; transcript_id "mdCircRNA-168"; exon_number "6" gene_name "GOLGA1"; gene_biotype "protein_coding"; oId "ce:circGOLGA1-432-001"; tissue "ce";
1	ncSplice	exon	419502466	419502498	.	-	.	gene_id "ENSMODG00000019758"; transcript_id "mdCircRNA-168"; exon_number "7" gene_name "GOLGA1"; gene_biotype "protein_coding"; oId "ce:circGOLGA1-432-001"; tissue "ce";
1	ncSplice	gene	443888963	443925165	.	+	.	gene_id "ENSMODG00000009684"; gene_name "FTO"; gene_source "ncSplice"; gene_biotype "protein_coding";
1	ncSplice	transcript	443888963	443925165	.	+	.	gene_id "ENSMODG00000009684"; transcript_id "mdCircRNA-169"; gene_name "FTO"; gene_biotype "protein_coding"; transcript_biotype "circRNA"; oId "ce:circFTO-455-001|ts:circFTO-1109-001"; tissue "ce|ts";
1	ncSplice	exon	443888963	443889106	.	+	.	gene_id "ENSMODG00000009684"; transcript_id "mdCircRNA-169"; exon_number "1" gene_name "FTO"; gene_biotype "protein_coding"; oId "ce:circFTO-455-001|ts:circFTO-1109-001"; tissue "ce|ts";
1	ncSplice	exon	443900856	443900935	.	+	.	gene_id "ENSMODG00000009684"; transcript_id "mdCircRNA-169"; exon_number "2" gene_name "FTO"; gene_biotype "protein_coding"; oId "ce:circFTO-455-001|ts:circFTO-1109-001"; tissue "ce|ts";
1	ncSplice	exon	443915065	443915208	.	+	.	gene_id "ENSMODG00000009684"; transcript_id "mdCircRNA-169"; exon_number "3" gene_name "FTO"; gene_biotype "protein_coding"; oId "ce:circFTO-455-001|ts:circFTO-1109-001"; tissue "ce|ts";
1	ncSplice	exon	443925046	443925165	.	+	.	gene_id "ENSMODG00000009684"; transcript_id "mdCircRNA-169"; exon_number "4" gene_name "FTO"; gene_biotype "protein_coding"; oId "ce:circFTO-455-001|ts:circFTO-1109-001"; tissue "ce|ts";
1	ncSplice	gene	450844632	450850152	.	-	.	gene_id "ENSMODG00000014000"; gene_name "NA"; gene_source "ncSplice"; gene_biotype "protein_coding";
1	ncSplice	transcript	450844632	450850152	.	-	.	gene_id "ENSMODG00000014000"; transcript_id "mdCircRNA-170"; gene_name "NA"; gene_biotype "protein_coding"; transcript_biotype "circRNA"; oId "ce:circNA-466-001"; tissue "ce";
1	ncSplice	exon	450844632	450844958	.	-	.	gene_id "ENSMODG00000014000"; transcript_id "mdCircRNA-170"; exon_number "1" gene_name "NA"; gene_biotype "protein_coding"; oId "ce:circNA-466-001"; tissue "ce";
1	ncSplice	exon	450849838	450850152	.	-	.	gene_id "ENSMODG00000014000"; transcript_id "mdCircRNA-170"; exon_number "2" gene_name "NA"; gene_biotype "protein_coding"; oId "ce:circNA-466-001"; tissue "ce";
1	ncSplice	gene	456247569	456256686	.	-	.	gene_id "ENSMODG00000006998"; gene_name "FNBP1"; gene_source "ncSplice"; gene_biotype "protein_coding";
1	ncSplice	transcript	456247569	456256686	.	-	.	gene_id "ENSMODG00000006998"; transcript_id "mdCircRNA-171"; gene_name "FNBP1"; gene_biotype "protein_coding"; transcript_biotype "circRNA"; oId "ce:circFNBP1-476-001|ts:circFNBP1-1157-001"; tissue "ce|ts";
1	ncSplice	exon	456247569	456247716	.	-	.	gene_id "ENSMODG00000006998"; transcript_id "mdCircRNA-171"; exon_number "1" gene_name "FNBP1"; gene_biotype "protein_coding"; oId "ce:circFNBP1-476-001|ts:circFNBP1-1157-001"; tissue "ce|ts";
1	ncSplice	exon	456248499	456248555	.	-	.	gene_id "ENSMODG00000006998"; transcript_id "mdCircRNA-171"; exon_number "2" gene_name "FNBP1"; gene_biotype "protein_coding"; oId "ce:circFNBP1-476-001|ts:circFNBP1-1157-001"; tissue "ce|ts";
1	ncSplice	exon	456256571	456256686	.	-	.	gene_id "ENSMODG00000006998"; transcript_id "mdCircRNA-171"; exon_number "3" gene_name "FNBP1"; gene_biotype "protein_coding"; oId "ce:circFNBP1-476-001|ts:circFNBP1-1157-001"; tissue "ce|ts";
1	ncSplice	gene	457089380	457099519	.	+	.	gene_id "ENSMODG00000012105"; gene_name "FUBP3"; gene_source "ncSplice"; gene_biotype "protein_coding";
1	ncSplice	transcript	457089380	457099519	.	+	.	gene_id "ENSMODG00000012105"; transcript_id "mdCircRNA-172"; gene_name "FUBP3"; gene_biotype "protein_coding"; transcript_biotype "circRNA"; oId "ce:circFUBP3-480-001"; tissue "ce";
1	ncSplice	exon	457089380	457089451	.	+	.	gene_id "ENSMODG00000012105"; transcript_id "mdCircRNA-172"; exon_number "1" gene_name "FUBP3"; gene_biotype "protein_coding"; oId "ce:circFUBP3-480-001"; tissue "ce";
1	ncSplice	exon	457091084	457091141	.	+	.	gene_id "ENSMODG00000012105"; transcript_id "mdCircRNA-172"; exon_number "2" gene_name "FUBP3"; gene_biotype "protein_coding"; oId "ce:circFUBP3-480-001"; tissue "ce";
1	ncSplice	exon	457092782	457092944	.	+	.	gene_id "ENSMODG00000012105"; transcript_id "mdCircRNA-172"; exon_number "3" gene_name "FUBP3"; gene_biotype "protein_coding"; oId "ce:circFUBP3-480-001"; tissue "ce";
1	ncSplice	exon	457095343	457095441	.	+	.	gene_id "ENSMODG00000012105"; transcript_id "mdCircRNA-172"; exon_number "4" gene_name "FUBP3"; gene_biotype "protein_coding"; oId "ce:circFUBP3-480-001"; tissue "ce";
1	ncSplice	exon	457097899	457098003	.	+	.	gene_id "ENSMODG00000012105"; transcript_id "mdCircRNA-172"; exon_number "5" gene_name "FUBP3"; gene_biotype "protein_coding"; oId "ce:circFUBP3-480-001"; tissue "ce";
1	ncSplice	exon	457098465	457098567	.	+	.	gene_id "ENSMODG00000012105"; transcript_id "mdCircRNA-172"; exon_number "6" gene_name "FUBP3"; gene_biotype "protein_coding"; oId "ce:circFUBP3-480-001"; tissue "ce";
1	ncSplice	exon	457099419	457099519	.	+	.	gene_id "ENSMODG00000012105"; transcript_id "mdCircRNA-172"; exon_number "7" gene_name "FUBP3"; gene_biotype "protein_coding"; oId "ce:circFUBP3-480-001"; tissue "ce";
1	ncSplice	gene	496181033	496205860	.	-	.	gene_id "ENSMODG00000016304"; gene_name "SLC9A8"; gene_source "ncSplice"; gene_biotype "protein_coding";
1	ncSplice	transcript	496181033	496205860	.	-	.	gene_id "ENSMODG00000016304"; transcript_id "mdCircRNA-173"; gene_name "SLC9A8"; gene_biotype "protein_coding"; transcript_biotype "circRNA"; oId "ce:circSLC9A8-526-001"; tissue "ce";
1	ncSplice	exon	496181033	496181144	.	-	.	gene_id "ENSMODG00000016304"; transcript_id "mdCircRNA-173"; exon_number "1" gene_name "SLC9A8"; gene_biotype "protein_coding"; oId "ce:circSLC9A8-526-001"; tissue "ce";
1	ncSplice	exon	496186266	496186348	.	-	.	gene_id "ENSMODG00000016304"; transcript_id "mdCircRNA-173"; exon_number "2" gene_name "SLC9A8"; gene_biotype "protein_coding"; oId "ce:circSLC9A8-526-001"; tissue "ce";
1	ncSplice	exon	496192997	496193113	.	-	.	gene_id "ENSMODG00000016304"; transcript_id "mdCircRNA-173"; exon_number "3" gene_name "SLC9A8"; gene_biotype "protein_coding"; oId "ce:circSLC9A8-526-001"; tissue "ce";
1	ncSplice	exon	496200412	496200517	.	-	.	gene_id "ENSMODG00000016304"; transcript_id "mdCircRNA-173"; exon_number "4" gene_name "SLC9A8"; gene_biotype "protein_coding"; oId "ce:circSLC9A8-526-001"; tissue "ce";
1	ncSplice	exon	496203552	496203690	.	-	.	gene_id "ENSMODG00000016304"; transcript_id "mdCircRNA-173"; exon_number "5" gene_name "SLC9A8"; gene_biotype "protein_coding"; oId "ce:circSLC9A8-526-001"; tissue "ce";
1	ncSplice	exon	496205717	496205860	.	-	.	gene_id "ENSMODG00000016304"; transcript_id "mdCircRNA-173"; exon_number "6" gene_name "SLC9A8"; gene_biotype "protein_coding"; oId "ce:circSLC9A8-526-001"; tissue "ce";
1	ncSplice	gene	499146812	499148612	.	+	.	gene_id "ENSMODG00000016238"; gene_name "ZMYND8"; gene_source "ncSplice"; gene_biotype "protein_coding";
1	ncSplice	transcript	499146812	499148612	.	+	.	gene_id "ENSMODG00000016238"; transcript_id "mdCircRNA-174"; gene_name "ZMYND8"; gene_biotype "protein_coding"; transcript_biotype "circRNA"; oId "ce:circZMYND8-534-001"; tissue "ce";
1	ncSplice	exon	499146812	499147051	.	+	.	gene_id "ENSMODG00000016238"; transcript_id "mdCircRNA-174"; exon_number "1" gene_name "ZMYND8"; gene_biotype "protein_coding"; oId "ce:circZMYND8-534-001"; tissue "ce";
1	ncSplice	exon	499148458	499148612	.	+	.	gene_id "ENSMODG00000016238"; transcript_id "mdCircRNA-174"; exon_number "2" gene_name "ZMYND8"; gene_biotype "protein_coding"; oId "ce:circZMYND8-534-001"; tissue "ce";
1	ncSplice	gene	506171339	506245111	.	-	.	gene_id "ENSMODG00000015846"; gene_name "DTNB"; gene_source "ncSplice"; gene_biotype "protein_coding";
1	ncSplice	transcript	506171339	506245111	.	-	.	gene_id "ENSMODG00000015846"; transcript_id "mdCircRNA-175"; gene_name "DTNB"; gene_biotype "protein_coding"; transcript_biotype "circRNA"; oId "ce:circDTNB-550-001"; tissue "ce";
1	ncSplice	exon	506171339	506171463	.	-	.	gene_id "ENSMODG00000015846"; transcript_id "mdCircRNA-175"; exon_number "1" gene_name "DTNB"; gene_biotype "protein_coding"; oId "ce:circDTNB-550-001"; tissue "ce";
1	ncSplice	exon	506212444	506212610	.	-	.	gene_id "ENSMODG00000015846"; transcript_id "mdCircRNA-175"; exon_number "2" gene_name "DTNB"; gene_biotype "protein_coding"; oId "ce:circDTNB-550-001"; tissue "ce";
1	ncSplice	exon	506215892	506215997	.	-	.	gene_id "ENSMODG00000015846"; transcript_id "mdCircRNA-175"; exon_number "3" gene_name "DTNB"; gene_biotype "protein_coding"; oId "ce:circDTNB-550-001"; tissue "ce";
1	ncSplice	exon	506229412	506229566	.	-	.	gene_id "ENSMODG00000015846"; transcript_id "mdCircRNA-175"; exon_number "4" gene_name "DTNB"; gene_biotype "protein_coding"; oId "ce:circDTNB-550-001"; tissue "ce";
1	ncSplice	exon	506245026	506245111	.	-	.	gene_id "ENSMODG00000015846"; transcript_id "mdCircRNA-175"; exon_number "5" gene_name "DTNB"; gene_biotype "protein_coding"; oId "ce:circDTNB-550-001"; tissue "ce";
1	ncSplice	gene	506212444	506245111	.	-	.	gene_id "ENSMODG00000015846"; gene_name "DTNB"; gene_source "ncSplice"; gene_biotype "protein_coding";
1	ncSplice	transcript	506212444	506245111	.	-	.	gene_id "ENSMODG00000015846"; transcript_id "mdCircRNA-176"; gene_name "DTNB"; gene_biotype "protein_coding"; transcript_biotype "circRNA"; oId "ce:circDTNB-551-001"; tissue "ce";
1	ncSplice	exon	506212444	506212610	.	-	.	gene_id "ENSMODG00000015846"; transcript_id "mdCircRNA-176"; exon_number "1" gene_name "DTNB"; gene_biotype "protein_coding"; oId "ce:circDTNB-551-001"; tissue "ce";
1	ncSplice	exon	506215892	506215997	.	-	.	gene_id "ENSMODG00000015846"; transcript_id "mdCircRNA-176"; exon_number "2" gene_name "DTNB"; gene_biotype "protein_coding"; oId "ce:circDTNB-551-001"; tissue "ce";
1	ncSplice	exon	506229412	506229566	.	-	.	gene_id "ENSMODG00000015846"; transcript_id "mdCircRNA-176"; exon_number "3" gene_name "DTNB"; gene_biotype "protein_coding"; oId "ce:circDTNB-551-001"; tissue "ce";
1	ncSplice	exon	506245026	506245111	.	-	.	gene_id "ENSMODG00000015846"; transcript_id "mdCircRNA-176"; exon_number "4" gene_name "DTNB"; gene_biotype "protein_coding"; oId "ce:circDTNB-551-001"; tissue "ce";
1	ncSplice	gene	506275089	506317807	.	-	.	gene_id "ENSMODG00000015846"; gene_name "DTNB"; gene_source "ncSplice"; gene_biotype "protein_coding";
1	ncSplice	transcript	506275089	506317807	.	-	.	gene_id "ENSMODG00000015846"; transcript_id "mdCircRNA-177"; gene_name "DTNB"; gene_biotype "protein_coding"; transcript_biotype "circRNA"; oId "ce:circDTNB-553-001|ts:circDTNB-1362-001"; tissue "ce|ts";
1	ncSplice	exon	506275089	506275302	.	-	.	gene_id "ENSMODG00000015846"; transcript_id "mdCircRNA-177"; exon_number "1" gene_name "DTNB"; gene_biotype "protein_coding"; oId "ce:circDTNB-553-001|ts:circDTNB-1362-001"; tissue "ce|ts";
1	ncSplice	exon	506301874	506301954	.	-	.	gene_id "ENSMODG00000015846"; transcript_id "mdCircRNA-177"; exon_number "2" gene_name "DTNB"; gene_biotype "protein_coding"; oId "ce:circDTNB-553-001|ts:circDTNB-1362-001"; tissue "ce|ts";
1	ncSplice	exon	506317740	506317807	.	-	.	gene_id "ENSMODG00000015846"; transcript_id "mdCircRNA-177"; exon_number "3" gene_name "DTNB"; gene_biotype "protein_coding"; oId "ce:circDTNB-553-001|ts:circDTNB-1362-001"; tissue "ce|ts";
1	ncSplice	gene	506469522	506475544	.	-	.	gene_id "ENSMODG00000015832"; gene_name "ASXL2"; gene_source "ncSplice"; gene_biotype "protein_coding";
1	ncSplice	transcript	506469522	506475544	.	-	.	gene_id "ENSMODG00000015832"; transcript_id "mdCircRNA-178"; gene_name "ASXL2"; gene_biotype "protein_coding"; transcript_biotype "circRNA"; oId "ce:circASXL2-555-001"; tissue "ce";
1	ncSplice	exon	506469522	506469685	.	-	.	gene_id "ENSMODG00000015832"; transcript_id "mdCircRNA-178"; exon_number "1" gene_name "ASXL2"; gene_biotype "protein_coding"; oId "ce:circASXL2-555-001"; tissue "ce";
1	ncSplice	exon	506474448	506474591	.	-	.	gene_id "ENSMODG00000015832"; transcript_id "mdCircRNA-178"; exon_number "2" gene_name "ASXL2"; gene_biotype "protein_coding"; oId "ce:circASXL2-555-001"; tissue "ce";
1	ncSplice	exon	506475403	506475544	.	-	.	gene_id "ENSMODG00000015832"; transcript_id "mdCircRNA-178"; exon_number "3" gene_name "ASXL2"; gene_biotype "protein_coding"; oId "ce:circASXL2-555-001"; tissue "ce";
1	ncSplice	gene	51638512	51642631	.	+	.	gene_id "ENSMODG00000000736"; gene_name "KAT6B"; gene_source "ncSplice"; gene_biotype "protein_coding";
1	ncSplice	transcript	51638512	51642631	.	+	.	gene_id "ENSMODG00000000736"; transcript_id "mdCircRNA-179"; gene_name "KAT6B"; gene_biotype "protein_coding"; transcript_biotype "circRNA"; oId "ce:circKAT6B-582-001|ts:circKAT6B-1424-001"; tissue "ce|ts";
1	ncSplice	exon	51638512	51638581	.	+	.	gene_id "ENSMODG00000000736"; transcript_id "mdCircRNA-179"; exon_number "1" gene_name "KAT6B"; gene_biotype "protein_coding"; oId "ce:circKAT6B-582-001|ts:circKAT6B-1424-001"; tissue "ce|ts";
1	ncSplice	exon	51641745	51642631	.	+	.	gene_id "ENSMODG00000000736"; transcript_id "mdCircRNA-179"; exon_number "2" gene_name "KAT6B"; gene_biotype "protein_coding"; oId "ce:circKAT6B-582-001|ts:circKAT6B-1424-001"; tissue "ce|ts";
1	ncSplice	gene	522616888	522676647	.	-	.	gene_id "ENSMODG00000015367"; gene_name "HEATR5B"; gene_source "ncSplice"; gene_biotype "protein_coding";
1	ncSplice	transcript	522616888	522676647	.	-	.	gene_id "ENSMODG00000015367"; transcript_id "mdCircRNA-180"; gene_name "HEATR5B"; gene_biotype "protein_coding"; transcript_biotype "circRNA"; oId "ce:circHEATR5B-588-001"; tissue "ce";
1	ncSplice	exon	522616888	522617069	.	-	.	gene_id "ENSMODG00000015367"; transcript_id "mdCircRNA-180"; exon_number "1" gene_name "HEATR5B"; gene_biotype "protein_coding"; oId "ce:circHEATR5B-588-001"; tissue "ce";
1	ncSplice	exon	522620553	522620804	.	-	.	gene_id "ENSMODG00000015367"; transcript_id "mdCircRNA-180"; exon_number "2" gene_name "HEATR5B"; gene_biotype "protein_coding"; oId "ce:circHEATR5B-588-001"; tissue "ce";
1	ncSplice	exon	522623333	522623572	.	-	.	gene_id "ENSMODG00000015367"; transcript_id "mdCircRNA-180"; exon_number "3" gene_name "HEATR5B"; gene_biotype "protein_coding"; oId "ce:circHEATR5B-588-001"; tissue "ce";
1	ncSplice	exon	522627619	522627763	.	-	.	gene_id "ENSMODG00000015367"; transcript_id "mdCircRNA-180"; exon_number "4" gene_name "HEATR5B"; gene_biotype "protein_coding"; oId "ce:circHEATR5B-588-001"; tissue "ce";
1	ncSplice	exon	522640499	522640668	.	-	.	gene_id "ENSMODG00000015367"; transcript_id "mdCircRNA-180"; exon_number "5" gene_name "HEATR5B"; gene_biotype "protein_coding"; oId "ce:circHEATR5B-588-001"; tissue "ce";
1	ncSplice	exon	522642384	522642573	.	-	.	gene_id "ENSMODG00000015367"; transcript_id "mdCircRNA-180"; exon_number "6" gene_name "HEATR5B"; gene_biotype "protein_coding"; oId "ce:circHEATR5B-588-001"; tissue "ce";
1	ncSplice	exon	522659246	522659405	.	-	.	gene_id "ENSMODG00000015367"; transcript_id "mdCircRNA-180"; exon_number "7" gene_name "HEATR5B"; gene_biotype "protein_coding"; oId "ce:circHEATR5B-588-001"; tissue "ce";
1	ncSplice	exon	522670527	522670717	.	-	.	gene_id "ENSMODG00000015367"; transcript_id "mdCircRNA-180"; exon_number "8" gene_name "HEATR5B"; gene_biotype "protein_coding"; oId "ce:circHEATR5B-588-001"; tissue "ce";
1	ncSplice	exon	522672680	522672785	.	-	.	gene_id "ENSMODG00000015367"; transcript_id "mdCircRNA-180"; exon_number "9" gene_name "HEATR5B"; gene_biotype "protein_coding"; oId "ce:circHEATR5B-588-001"; tissue "ce";
1	ncSplice	exon	522675010	522675185	.	-	.	gene_id "ENSMODG00000015367"; transcript_id "mdCircRNA-180"; exon_number "10" gene_name "HEATR5B"; gene_biotype "protein_coding"; oId "ce:circHEATR5B-588-001"; tissue "ce";
1	ncSplice	exon	522675807	522675970	.	-	.	gene_id "ENSMODG00000015367"; transcript_id "mdCircRNA-180"; exon_number "11" gene_name "HEATR5B"; gene_biotype "protein_coding"; oId "ce:circHEATR5B-588-001"; tissue "ce";
1	ncSplice	exon	522676538	522676647	.	-	.	gene_id "ENSMODG00000015367"; transcript_id "mdCircRNA-180"; exon_number "12" gene_name "HEATR5B"; gene_biotype "protein_coding"; oId "ce:circHEATR5B-588-001"; tissue "ce";
1	ncSplice	gene	562329119	562337841	.	-	.	gene_id "ENSMODG00000011674"; gene_name "CDS2"; gene_source "ncSplice"; gene_biotype "protein_coding";
1	ncSplice	transcript	562329119	562337841	.	-	.	gene_id "ENSMODG00000011674"; transcript_id "mdCircRNA-181"; gene_name "CDS2"; gene_biotype "protein_coding"; transcript_biotype "circRNA"; oId "ce:circCDS2-617-001"; tissue "ce";
1	ncSplice	exon	562329119	562329258	.	-	.	gene_id "ENSMODG00000011674"; transcript_id "mdCircRNA-181"; exon_number "1" gene_name "CDS2"; gene_biotype "protein_coding"; oId "ce:circCDS2-617-001"; tissue "ce";
1	ncSplice	exon	562331760	562331857	.	-	.	gene_id "ENSMODG00000011674"; transcript_id "mdCircRNA-181"; exon_number "2" gene_name "CDS2"; gene_biotype "protein_coding"; oId "ce:circCDS2-617-001"; tissue "ce";
1	ncSplice	exon	562335338	562335434	.	-	.	gene_id "ENSMODG00000011674"; transcript_id "mdCircRNA-181"; exon_number "3" gene_name "CDS2"; gene_biotype "protein_coding"; oId "ce:circCDS2-617-001"; tissue "ce";
1	ncSplice	exon	562337708	562337841	.	-	.	gene_id "ENSMODG00000011674"; transcript_id "mdCircRNA-181"; exon_number "4" gene_name "CDS2"; gene_biotype "protein_coding"; oId "ce:circCDS2-617-001"; tissue "ce";
1	ncSplice	gene	577399904	577430555	.	-	.	gene_id "ENSMODG00000010328"; gene_name "KAT6A"; gene_source "ncSplice"; gene_biotype "protein_coding";
1	ncSplice	transcript	577399904	577430555	.	-	.	gene_id "ENSMODG00000010328"; transcript_id "mdCircRNA-182"; gene_name "KAT6A"; gene_biotype "protein_coding"; transcript_biotype "circRNA"; oId "ce:circKAT6A-628-001"; tissue "ce";
1	ncSplice	exon	577399904	577400135	.	-	.	gene_id "ENSMODG00000010328"; transcript_id "mdCircRNA-182"; exon_number "1" gene_name "KAT6A"; gene_biotype "protein_coding"; oId "ce:circKAT6A-628-001"; tissue "ce";
1	ncSplice	exon	577402918	577403011	.	-	.	gene_id "ENSMODG00000010328"; transcript_id "mdCircRNA-182"; exon_number "2" gene_name "KAT6A"; gene_biotype "protein_coding"; oId "ce:circKAT6A-628-001"; tissue "ce";
1	ncSplice	exon	577404169	577425043	.	-	.	gene_id "ENSMODG00000010328"; transcript_id "mdCircRNA-182"; exon_number "3" gene_name "KAT6A"; gene_biotype "protein_coding"; oId "ce:circKAT6A-628-001"; tissue "ce";
1	ncSplice	exon	577430437	577430555	.	-	.	gene_id "ENSMODG00000010328"; transcript_id "mdCircRNA-182"; exon_number "4" gene_name "KAT6A"; gene_biotype "protein_coding"; oId "ce:circKAT6A-628-001"; tissue "ce";
1	ncSplice	gene	578779841	578811019	.	-	.	gene_id "ENSMODG00000009962"; gene_name "INTS10"; gene_source "ncSplice"; gene_biotype "protein_coding";
1	ncSplice	transcript	578779841	578811019	.	-	.	gene_id "ENSMODG00000009962"; transcript_id "mdCircRNA-183"; gene_name "INTS10"; gene_biotype "protein_coding"; transcript_biotype "circRNA"; oId "ce:circINTS10-633-001"; tissue "ce";
1	ncSplice	exon	578779841	578780003	.	-	.	gene_id "ENSMODG00000009962"; transcript_id "mdCircRNA-183"; exon_number "1" gene_name "INTS10"; gene_biotype "protein_coding"; oId "ce:circINTS10-633-001"; tissue "ce";
1	ncSplice	exon	578781496	578781575	.	-	.	gene_id "ENSMODG00000009962"; transcript_id "mdCircRNA-183"; exon_number "2" gene_name "INTS10"; gene_biotype "protein_coding"; oId "ce:circINTS10-633-001"; tissue "ce";
1	ncSplice	exon	578787841	578787949	.	-	.	gene_id "ENSMODG00000009962"; transcript_id "mdCircRNA-183"; exon_number "3" gene_name "INTS10"; gene_biotype "protein_coding"; oId "ce:circINTS10-633-001"; tissue "ce";
1	ncSplice	exon	578790319	578790471	.	-	.	gene_id "ENSMODG00000009962"; transcript_id "mdCircRNA-183"; exon_number "4" gene_name "INTS10"; gene_biotype "protein_coding"; oId "ce:circINTS10-633-001"; tissue "ce";
1	ncSplice	exon	578791569	578791651	.	-	.	gene_id "ENSMODG00000009962"; transcript_id "mdCircRNA-183"; exon_number "5" gene_name "INTS10"; gene_biotype "protein_coding"; oId "ce:circINTS10-633-001"; tissue "ce";
1	ncSplice	exon	578796040	578796193	.	-	.	gene_id "ENSMODG00000009962"; transcript_id "mdCircRNA-183"; exon_number "6" gene_name "INTS10"; gene_biotype "protein_coding"; oId "ce:circINTS10-633-001"; tissue "ce";
1	ncSplice	exon	578809548	578809681	.	-	.	gene_id "ENSMODG00000009962"; transcript_id "mdCircRNA-183"; exon_number "7" gene_name "INTS10"; gene_biotype "protein_coding"; oId "ce:circINTS10-633-001"; tissue "ce";
1	ncSplice	exon	578810003	578810172	.	-	.	gene_id "ENSMODG00000009962"; transcript_id "mdCircRNA-183"; exon_number "8" gene_name "INTS10"; gene_biotype "protein_coding"; oId "ce:circINTS10-633-001"; tissue "ce";
1	ncSplice	exon	578810574	578811019	.	-	.	gene_id "ENSMODG00000009962"; transcript_id "mdCircRNA-183"; exon_number "9" gene_name "INTS10"; gene_biotype "protein_coding"; oId "ce:circINTS10-633-001"; tissue "ce";
1	ncSplice	gene	588369577	588392873	.	-	.	gene_id "ENSMODG00000008788"; gene_name "HMBOX1"; gene_source "ncSplice"; gene_biotype "protein_coding";
1	ncSplice	transcript	588369577	588392873	.	-	.	gene_id "ENSMODG00000008788"; transcript_id "mdCircRNA-184"; gene_name "HMBOX1"; gene_biotype "protein_coding"; transcript_biotype "circRNA"; oId "ce:circHMBOX1-639-001"; tissue "ce";
1	ncSplice	exon	588369577	588369730	.	-	.	gene_id "ENSMODG00000008788"; transcript_id "mdCircRNA-184"; exon_number "1" gene_name "HMBOX1"; gene_biotype "protein_coding"; oId "ce:circHMBOX1-639-001"; tissue "ce";
1	ncSplice	exon	588392763	588392873	.	-	.	gene_id "ENSMODG00000008788"; transcript_id "mdCircRNA-184"; exon_number "2" gene_name "HMBOX1"; gene_biotype "protein_coding"; oId "ce:circHMBOX1-639-001"; tissue "ce";
1	ncSplice	gene	616204490	616205839	.	-	.	gene_id "ENSMODG00000004697"; gene_name "PLCB4"; gene_source "ncSplice"; gene_biotype "protein_coding";
1	ncSplice	transcript	616204490	616205839	.	-	.	gene_id "ENSMODG00000004697"; transcript_id "mdCircRNA-185"; gene_name "PLCB4"; gene_biotype "protein_coding"; transcript_biotype "circRNA"; oId "ce:circPLCB4-662-001|ts:circPLCB4-1674-001"; tissue "ce|ts";
1	ncSplice	exon	616204490	616204614	.	-	.	gene_id "ENSMODG00000004697"; transcript_id "mdCircRNA-185"; exon_number "1" gene_name "PLCB4"; gene_biotype "protein_coding"; oId "ce:circPLCB4-662-001|ts:circPLCB4-1674-001"; tissue "ce|ts";
1	ncSplice	exon	616204918	616205002	.	-	.	gene_id "ENSMODG00000004697"; transcript_id "mdCircRNA-185"; exon_number "2" gene_name "PLCB4"; gene_biotype "protein_coding"; oId "ce:circPLCB4-662-001|ts:circPLCB4-1674-001"; tissue "ce|ts";
1	ncSplice	exon	616205698	616205839	.	-	.	gene_id "ENSMODG00000004697"; transcript_id "mdCircRNA-185"; exon_number "3" gene_name "PLCB4"; gene_biotype "protein_coding"; oId "ce:circPLCB4-662-001|ts:circPLCB4-1674-001"; tissue "ce|ts";
1	ncSplice	gene	616267434	616269741	.	-	.	gene_id "ENSMODG00000004697"; gene_name "PLCB4"; gene_source "ncSplice"; gene_biotype "protein_coding";
1	ncSplice	transcript	616267434	616269741	.	-	.	gene_id "ENSMODG00000004697"; transcript_id "mdCircRNA-186"; gene_name "PLCB4"; gene_biotype "protein_coding"; transcript_biotype "circRNA"; oId "ce:circPLCB4-663-001|ts:circPLCB4-1676-001"; tissue "ce|ts";
1	ncSplice	exon	616267434	616267577	.	-	.	gene_id "ENSMODG00000004697"; transcript_id "mdCircRNA-186"; exon_number "1" gene_name "PLCB4"; gene_biotype "protein_coding"; oId "ce:circPLCB4-663-001|ts:circPLCB4-1676-001"; tissue "ce|ts";
1	ncSplice	exon	616268904	616268963	.	-	.	gene_id "ENSMODG00000004697"; transcript_id "mdCircRNA-186"; exon_number "2" gene_name "PLCB4"; gene_biotype "protein_coding"; oId "ce:circPLCB4-663-001|ts:circPLCB4-1676-001"; tissue "ce|ts";
1	ncSplice	exon	616269661	616269741	.	-	.	gene_id "ENSMODG00000004697"; transcript_id "mdCircRNA-186"; exon_number "3" gene_name "PLCB4"; gene_biotype "protein_coding"; oId "ce:circPLCB4-663-001|ts:circPLCB4-1676-001"; tissue "ce|ts";
1	ncSplice	gene	628311324	628330420	.	+	.	gene_id "ENSMODG00000003191"; gene_name "VPS54"; gene_source "ncSplice"; gene_biotype "protein_coding";
1	ncSplice	transcript	628311324	628330420	.	+	.	gene_id "ENSMODG00000003191"; transcript_id "mdCircRNA-187"; gene_name "VPS54"; gene_biotype "protein_coding"; transcript_biotype "circRNA"; oId "ce:circVPS54-674-001|ts:circVPS54-1691-001"; tissue "ce|ts";
1	ncSplice	exon	628311324	628311455	.	+	.	gene_id "ENSMODG00000003191"; transcript_id "mdCircRNA-187"; exon_number "1" gene_name "VPS54"; gene_biotype "protein_coding"; oId "ce:circVPS54-674-001|ts:circVPS54-1691-001"; tissue "ce|ts";
1	ncSplice	exon	628315162	628315547	.	+	.	gene_id "ENSMODG00000003191"; transcript_id "mdCircRNA-187"; exon_number "2" gene_name "VPS54"; gene_biotype "protein_coding"; oId "ce:circVPS54-674-001|ts:circVPS54-1691-001"; tissue "ce|ts";
1	ncSplice	exon	628325903	628326029	.	+	.	gene_id "ENSMODG00000003191"; transcript_id "mdCircRNA-187"; exon_number "3" gene_name "VPS54"; gene_biotype "protein_coding"; oId "ce:circVPS54-674-001|ts:circVPS54-1691-001"; tissue "ce|ts";
1	ncSplice	exon	628329225	628329332	.	+	.	gene_id "ENSMODG00000003191"; transcript_id "mdCircRNA-187"; exon_number "4" gene_name "VPS54"; gene_biotype "protein_coding"; oId "ce:circVPS54-674-001|ts:circVPS54-1691-001"; tissue "ce|ts";
1	ncSplice	exon	628330365	628330420	.	+	.	gene_id "ENSMODG00000003191"; transcript_id "mdCircRNA-187"; exon_number "5" gene_name "VPS54"; gene_biotype "protein_coding"; oId "ce:circVPS54-674-001|ts:circVPS54-1691-001"; tissue "ce|ts";
1	ncSplice	gene	631776188	631777464	.	+	.	gene_id "ENSMODG00000002202"; gene_name "PUS10"; gene_source "ncSplice"; gene_biotype "protein_coding";
1	ncSplice	transcript	631776188	631777464	.	+	.	gene_id "ENSMODG00000002202"; transcript_id "mdCircRNA-188"; gene_name "PUS10"; gene_biotype "protein_coding"; transcript_biotype "circRNA"; oId "ce:circPUS10-679-001"; tissue "ce";
1	ncSplice	exon	631776188	631776244	.	+	.	gene_id "ENSMODG00000002202"; transcript_id "mdCircRNA-188"; exon_number "1" gene_name "PUS10"; gene_biotype "protein_coding"; oId "ce:circPUS10-679-001"; tissue "ce";
1	ncSplice	exon	631777033	631777109	.	+	.	gene_id "ENSMODG00000002202"; transcript_id "mdCircRNA-188"; exon_number "2" gene_name "PUS10"; gene_biotype "protein_coding"; oId "ce:circPUS10-679-001"; tissue "ce";
1	ncSplice	exon	631777196	631777251	.	+	.	gene_id "ENSMODG00000002202"; transcript_id "mdCircRNA-188"; exon_number "3" gene_name "PUS10"; gene_biotype "protein_coding"; oId "ce:circPUS10-679-001"; tissue "ce";
1	ncSplice	exon	631777347	631777464	.	+	.	gene_id "ENSMODG00000002202"; transcript_id "mdCircRNA-188"; exon_number "4" gene_name "PUS10"; gene_biotype "protein_coding"; oId "ce:circPUS10-679-001"; tissue "ce";
1	ncSplice	gene	661456305	661470876	.	+	.	gene_id "ENSMODG00000009097"; gene_name "MAP4K3"; gene_source "ncSplice"; gene_biotype "protein_coding";
1	ncSplice	transcript	661456305	661470876	.	+	.	gene_id "ENSMODG00000009097"; transcript_id "mdCircRNA-189"; gene_name "MAP4K3"; gene_biotype "protein_coding"; transcript_biotype "circRNA"; oId "ce:circMAP4K3-690-001"; tissue "ce";
1	ncSplice	exon	661456305	661456369	.	+	.	gene_id "ENSMODG00000009097"; transcript_id "mdCircRNA-189"; exon_number "1" gene_name "MAP4K3"; gene_biotype "protein_coding"; oId "ce:circMAP4K3-690-001"; tissue "ce";
1	ncSplice	exon	661461785	661461840	.	+	.	gene_id "ENSMODG00000009097"; transcript_id "mdCircRNA-189"; exon_number "2" gene_name "MAP4K3"; gene_biotype "protein_coding"; oId "ce:circMAP4K3-690-001"; tissue "ce";
1	ncSplice	exon	661462557	661462604	.	+	.	gene_id "ENSMODG00000009097"; transcript_id "mdCircRNA-189"; exon_number "3" gene_name "MAP4K3"; gene_biotype "protein_coding"; oId "ce:circMAP4K3-690-001"; tissue "ce";
1	ncSplice	exon	661464046	661464088	.	+	.	gene_id "ENSMODG00000009097"; transcript_id "mdCircRNA-189"; exon_number "4" gene_name "MAP4K3"; gene_biotype "protein_coding"; oId "ce:circMAP4K3-690-001"; tissue "ce";
1	ncSplice	exon	661466198	661466270	.	+	.	gene_id "ENSMODG00000009097"; transcript_id "mdCircRNA-189"; exon_number "5" gene_name "MAP4K3"; gene_biotype "protein_coding"; oId "ce:circMAP4K3-690-001"; tissue "ce";
1	ncSplice	exon	661470095	661470226	.	+	.	gene_id "ENSMODG00000009097"; transcript_id "mdCircRNA-189"; exon_number "6" gene_name "MAP4K3"; gene_biotype "protein_coding"; oId "ce:circMAP4K3-690-001"; tissue "ce";
1	ncSplice	exon	661470446	661470508	.	+	.	gene_id "ENSMODG00000009097"; transcript_id "mdCircRNA-189"; exon_number "7" gene_name "MAP4K3"; gene_biotype "protein_coding"; oId "ce:circMAP4K3-690-001"; tissue "ce";
1	ncSplice	exon	661470590	661470671	.	+	.	gene_id "ENSMODG00000009097"; transcript_id "mdCircRNA-189"; exon_number "8" gene_name "MAP4K3"; gene_biotype "protein_coding"; oId "ce:circMAP4K3-690-001"; tissue "ce";
1	ncSplice	exon	661470766	661470876	.	+	.	gene_id "ENSMODG00000009097"; transcript_id "mdCircRNA-189"; exon_number "9" gene_name "MAP4K3"; gene_biotype "protein_coding"; oId "ce:circMAP4K3-690-001"; tissue "ce";
1	ncSplice	gene	668016043	668019342	.	-	.	gene_id "ENSMODG00000008124"; gene_name "WWOX"; gene_source "ncSplice"; gene_biotype "protein_coding";
1	ncSplice	transcript	668016043	668019342	.	-	.	gene_id "ENSMODG00000008124"; transcript_id "mdCircRNA-190"; gene_name "WWOX"; gene_biotype "protein_coding"; transcript_biotype "circRNA"; oId "ce:circWWOX-695-001|ts:circWWOX-1810-001"; tissue "ce|ts";
1	ncSplice	exon	668016043	668016221	.	-	.	gene_id "ENSMODG00000008124"; transcript_id "mdCircRNA-190"; exon_number "1" gene_name "WWOX"; gene_biotype "protein_coding"; oId "ce:circWWOX-695-001|ts:circWWOX-1810-001"; tissue "ce|ts";
1	ncSplice	exon	668018032	668018089	.	-	.	gene_id "ENSMODG00000008124"; transcript_id "mdCircRNA-190"; exon_number "2" gene_name "WWOX"; gene_biotype "protein_coding"; oId "ce:circWWOX-695-001|ts:circWWOX-1810-001"; tissue "ce|ts";
1	ncSplice	exon	668019278	668019342	.	-	.	gene_id "ENSMODG00000008124"; transcript_id "mdCircRNA-190"; exon_number "3" gene_name "WWOX"; gene_biotype "protein_coding"; oId "ce:circWWOX-695-001|ts:circWWOX-1810-001"; tissue "ce|ts";
1	ncSplice	gene	687518668	687524764	.	-	.	gene_id "ENSMODG00000004990"; gene_name "MBTPS1"; gene_source "ncSplice"; gene_biotype "protein_coding";
1	ncSplice	transcript	687518668	687524764	.	-	.	gene_id "ENSMODG00000004990"; transcript_id "mdCircRNA-191"; gene_name "MBTPS1"; gene_biotype "protein_coding"; transcript_biotype "circRNA"; oId "ce:circMBTPS1-696-001"; tissue "ce";
1	ncSplice	exon	687518668	687518735	.	-	.	gene_id "ENSMODG00000004990"; transcript_id "mdCircRNA-191"; exon_number "1" gene_name "MBTPS1"; gene_biotype "protein_coding"; oId "ce:circMBTPS1-696-001"; tissue "ce";
1	ncSplice	exon	687519525	687519641	.	-	.	gene_id "ENSMODG00000004990"; transcript_id "mdCircRNA-191"; exon_number "2" gene_name "MBTPS1"; gene_biotype "protein_coding"; oId "ce:circMBTPS1-696-001"; tissue "ce";
1	ncSplice	exon	687524179	687524288	.	-	.	gene_id "ENSMODG00000004990"; transcript_id "mdCircRNA-191"; exon_number "3" gene_name "MBTPS1"; gene_biotype "protein_coding"; oId "ce:circMBTPS1-696-001"; tissue "ce";
1	ncSplice	exon	687524654	687524764	.	-	.	gene_id "ENSMODG00000004990"; transcript_id "mdCircRNA-191"; exon_number "4" gene_name "MBTPS1"; gene_biotype "protein_coding"; oId "ce:circMBTPS1-696-001"; tissue "ce";
1	ncSplice	gene	692834590	692853509	.	-	.	gene_id "ENSMODG00000004509"; gene_name "FBXO31"; gene_source "ncSplice"; gene_biotype "protein_coding";
1	ncSplice	transcript	692834590	692853509	.	-	.	gene_id "ENSMODG00000004509"; transcript_id "mdCircRNA-192"; gene_name "FBXO31"; gene_biotype "protein_coding"; transcript_biotype "circRNA"; oId "ce:circFBXO31-701-001"; tissue "ce";
1	ncSplice	exon	692834590	692834905	.	-	.	gene_id "ENSMODG00000004509"; transcript_id "mdCircRNA-192"; exon_number "1" gene_name "FBXO31"; gene_biotype "protein_coding"; oId "ce:circFBXO31-701-001"; tissue "ce";
1	ncSplice	exon	692839548	692839978	.	-	.	gene_id "ENSMODG00000004509"; transcript_id "mdCircRNA-192"; exon_number "2" gene_name "FBXO31"; gene_biotype "protein_coding"; oId "ce:circFBXO31-701-001"; tissue "ce";
1	ncSplice	exon	692841917	692842070	.	-	.	gene_id "ENSMODG00000004509"; transcript_id "mdCircRNA-192"; exon_number "3" gene_name "FBXO31"; gene_biotype "protein_coding"; oId "ce:circFBXO31-701-001"; tissue "ce";
1	ncSplice	exon	692844002	692844111	.	-	.	gene_id "ENSMODG00000004509"; transcript_id "mdCircRNA-192"; exon_number "4" gene_name "FBXO31"; gene_biotype "protein_coding"; oId "ce:circFBXO31-701-001"; tissue "ce";
1	ncSplice	exon	692847834	692847908	.	-	.	gene_id "ENSMODG00000004509"; transcript_id "mdCircRNA-192"; exon_number "5" gene_name "FBXO31"; gene_biotype "protein_coding"; oId "ce:circFBXO31-701-001"; tissue "ce";
1	ncSplice	exon	692848575	692848742	.	-	.	gene_id "ENSMODG00000004509"; transcript_id "mdCircRNA-192"; exon_number "6" gene_name "FBXO31"; gene_biotype "protein_coding"; oId "ce:circFBXO31-701-001"; tissue "ce";
1	ncSplice	exon	692853433	692853509	.	-	.	gene_id "ENSMODG00000004509"; transcript_id "mdCircRNA-192"; exon_number "7" gene_name "FBXO31"; gene_biotype "protein_coding"; oId "ce:circFBXO31-701-001"; tissue "ce";
1	ncSplice	gene	697374650	697381106	.	+	.	gene_id "ENSMODG00000003715"; gene_name "SPG7"; gene_source "ncSplice"; gene_biotype "protein_coding";
1	ncSplice	transcript	697374650	697381106	.	+	.	gene_id "ENSMODG00000003715"; transcript_id "mdCircRNA-193"; gene_name "SPG7"; gene_biotype "protein_coding"; transcript_biotype "circRNA"; oId "ce:circSPG7-709-001"; tissue "ce";
1	ncSplice	exon	697374650	697374789	.	+	.	gene_id "ENSMODG00000003715"; transcript_id "mdCircRNA-193"; exon_number "1" gene_name "SPG7"; gene_biotype "protein_coding"; oId "ce:circSPG7-709-001"; tissue "ce";
1	ncSplice	exon	697378172	697378274	.	+	.	gene_id "ENSMODG00000003715"; transcript_id "mdCircRNA-193"; exon_number "2" gene_name "SPG7"; gene_biotype "protein_coding"; oId "ce:circSPG7-709-001"; tissue "ce";
1	ncSplice	exon	697379340	697379465	.	+	.	gene_id "ENSMODG00000003715"; transcript_id "mdCircRNA-193"; exon_number "3" gene_name "SPG7"; gene_biotype "protein_coding"; oId "ce:circSPG7-709-001"; tissue "ce";
1	ncSplice	exon	697380306	697380468	.	+	.	gene_id "ENSMODG00000003715"; transcript_id "mdCircRNA-193"; exon_number "4" gene_name "SPG7"; gene_biotype "protein_coding"; oId "ce:circSPG7-709-001"; tissue "ce";
1	ncSplice	exon	697380933	697381106	.	+	.	gene_id "ENSMODG00000003715"; transcript_id "mdCircRNA-193"; exon_number "5" gene_name "SPG7"; gene_biotype "protein_coding"; oId "ce:circSPG7-709-001"; tissue "ce";
1	ncSplice	gene	70279754	70283752	.	-	.	gene_id "ENSMODG00000002640"; gene_name "PARG"; gene_source "ncSplice"; gene_biotype "protein_coding";
1	ncSplice	transcript	70279754	70283752	.	-	.	gene_id "ENSMODG00000002640"; transcript_id "mdCircRNA-194"; gene_name "PARG"; gene_biotype "protein_coding"; transcript_biotype "circRNA"; oId "ce:circPARG-721-001|ts:circPARG-1874-001"; tissue "ce|ts";
1	ncSplice	exon	70279754	70280734	.	-	.	gene_id "ENSMODG00000002640"; transcript_id "mdCircRNA-194"; exon_number "1" gene_name "PARG"; gene_biotype "protein_coding"; oId "ce:circPARG-721-001|ts:circPARG-1874-001"; tissue "ce|ts";
1	ncSplice	exon	70283689	70283752	.	-	.	gene_id "ENSMODG00000002640"; transcript_id "mdCircRNA-194"; exon_number "2" gene_name "PARG"; gene_biotype "protein_coding"; oId "ce:circPARG-721-001|ts:circPARG-1874-001"; tissue "ce|ts";
1	ncSplice	gene	7921278	7922980	.	+	.	gene_id "ENSMODG00000012042"; gene_name "SCAPER"; gene_source "ncSplice"; gene_biotype "protein_coding";
1	ncSplice	transcript	7921278	7922980	.	+	.	gene_id "ENSMODG00000012042"; transcript_id "mdCircRNA-195"; gene_name "SCAPER"; gene_biotype "protein_coding"; transcript_biotype "circRNA"; oId "ce:circSCAPER-759-001|ts:circSCAPER-2002-001"; tissue "ce|ts";
1	ncSplice	exon	7921278	7921433	.	+	.	gene_id "ENSMODG00000012042"; transcript_id "mdCircRNA-195"; exon_number "1" gene_name "SCAPER"; gene_biotype "protein_coding"; oId "ce:circSCAPER-759-001|ts:circSCAPER-2002-001"; tissue "ce|ts";
1	ncSplice	exon	7922838	7922980	.	+	.	gene_id "ENSMODG00000012042"; transcript_id "mdCircRNA-195"; exon_number "2" gene_name "SCAPER"; gene_biotype "protein_coding"; oId "ce:circSCAPER-759-001|ts:circSCAPER-2002-001"; tissue "ce|ts";
1	ncSplice	gene	86213817	86216322	.	+	.	gene_id "ENSMODG00000008434"; gene_name "ATE1"; gene_source "ncSplice"; gene_biotype "protein_coding";
1	ncSplice	transcript	86213817	86216322	.	+	.	gene_id "ENSMODG00000008434"; transcript_id "mdCircRNA-196"; gene_name "ATE1"; gene_biotype "protein_coding"; transcript_biotype "circRNA"; oId "ce:circATE1-772-001|ts:circATE1-2026-001"; tissue "ce|ts";
1	ncSplice	exon	86213817	86213920	.	+	.	gene_id "ENSMODG00000008434"; transcript_id "mdCircRNA-196"; exon_number "1" gene_name "ATE1"; gene_biotype "protein_coding"; oId "ce:circATE1-772-001|ts:circATE1-2026-001"; tissue "ce|ts";
1	ncSplice	exon	86216065	86216322	.	+	.	gene_id "ENSMODG00000008434"; transcript_id "mdCircRNA-196"; exon_number "2" gene_name "ATE1"; gene_biotype "protein_coding"; oId "ce:circATE1-772-001|ts:circATE1-2026-001"; tissue "ce|ts";
1	ncSplice	gene	86222898	86228972	.	+	.	gene_id "ENSMODG00000008434"; gene_name "ATE1"; gene_source "ncSplice"; gene_biotype "protein_coding";
1	ncSplice	transcript	86222898	86228972	.	+	.	gene_id "ENSMODG00000008434"; transcript_id "mdCircRNA-197"; gene_name "ATE1"; gene_biotype "protein_coding"; transcript_biotype "circRNA"; oId "ce:circATE1-776-001|ts:circATE1-2029-001"; tissue "ce|ts";
1	ncSplice	exon	86222898	86223127	.	+	.	gene_id "ENSMODG00000008434"; transcript_id "mdCircRNA-197"; exon_number "1" gene_name "ATE1"; gene_biotype "protein_coding"; oId "ce:circATE1-776-001|ts:circATE1-2029-001"; tissue "ce|ts";
1	ncSplice	exon	86227789	86228972	.	+	.	gene_id "ENSMODG00000008434"; transcript_id "mdCircRNA-197"; exon_number "2" gene_name "ATE1"; gene_biotype "protein_coding"; oId "ce:circATE1-776-001|ts:circATE1-2029-001"; tissue "ce|ts";
1	ncSplice	gene	93043234	93054166	.	+	.	gene_id "ENSMODG00000009476"; gene_name "KIAA1598"; gene_source "ncSplice"; gene_biotype "protein_coding";
1	ncSplice	transcript	93043234	93054166	.	+	.	gene_id "ENSMODG00000009476"; transcript_id "mdCircRNA-198"; gene_name "KIAA1598"; gene_biotype "protein_coding"; transcript_biotype "circRNA"; oId "ce:circKIAA1598-794-001"; tissue "ce";
1	ncSplice	exon	93043234	93043333	.	+	.	gene_id "ENSMODG00000009476"; transcript_id "mdCircRNA-198"; exon_number "1" gene_name "KIAA1598"; gene_biotype "protein_coding"; oId "ce:circKIAA1598-794-001"; tissue "ce";
1	ncSplice	exon	93044969	93045051	.	+	.	gene_id "ENSMODG00000009476"; transcript_id "mdCircRNA-198"; exon_number "2" gene_name "KIAA1598"; gene_biotype "protein_coding"; oId "ce:circKIAA1598-794-001"; tissue "ce";
1	ncSplice	exon	93049579	93049688	.	+	.	gene_id "ENSMODG00000009476"; transcript_id "mdCircRNA-198"; exon_number "3" gene_name "KIAA1598"; gene_biotype "protein_coding"; oId "ce:circKIAA1598-794-001"; tissue "ce";
1	ncSplice	exon	93054113	93054166	.	+	.	gene_id "ENSMODG00000009476"; transcript_id "mdCircRNA-198"; exon_number "4" gene_name "KIAA1598"; gene_biotype "protein_coding"; oId "ce:circKIAA1598-794-001"; tissue "ce";
1	ncSplice	gene	95300866	95337525	.	-	.	gene_id "ENSMODG00000009640"; gene_name "ATRNL1"; gene_source "ncSplice"; gene_biotype "protein_coding";
1	ncSplice	transcript	95300866	95337525	.	-	.	gene_id "ENSMODG00000009640"; transcript_id "mdCircRNA-199"; gene_name "ATRNL1"; gene_biotype "protein_coding"; transcript_biotype "circRNA"; oId "ce:circATRNL1-798-001|ts:circATRNL1-2059-001"; tissue "ce|ts";
1	ncSplice	exon	95300866	95300953	.	-	.	gene_id "ENSMODG00000009640"; transcript_id "mdCircRNA-199"; exon_number "1" gene_name "ATRNL1"; gene_biotype "protein_coding"; oId "ce:circATRNL1-798-001|ts:circATRNL1-2059-001"; tissue "ce|ts";
1	ncSplice	exon	95303424	95303598	.	-	.	gene_id "ENSMODG00000009640"; transcript_id "mdCircRNA-199"; exon_number "2" gene_name "ATRNL1"; gene_biotype "protein_coding"; oId "ce:circATRNL1-798-001|ts:circATRNL1-2059-001"; tissue "ce|ts";
1	ncSplice	exon	95320038	95320246	.	-	.	gene_id "ENSMODG00000009640"; transcript_id "mdCircRNA-199"; exon_number "3" gene_name "ATRNL1"; gene_biotype "protein_coding"; oId "ce:circATRNL1-798-001|ts:circATRNL1-2059-001"; tissue "ce|ts";
1	ncSplice	exon	95324562	95324690	.	-	.	gene_id "ENSMODG00000009640"; transcript_id "mdCircRNA-199"; exon_number "4" gene_name "ATRNL1"; gene_biotype "protein_coding"; oId "ce:circATRNL1-798-001|ts:circATRNL1-2059-001"; tissue "ce|ts";
1	ncSplice	exon	95335144	95335257	.	-	.	gene_id "ENSMODG00000009640"; transcript_id "mdCircRNA-199"; exon_number "5" gene_name "ATRNL1"; gene_biotype "protein_coding"; oId "ce:circATRNL1-798-001|ts:circATRNL1-2059-001"; tissue "ce|ts";
1	ncSplice	exon	95337442	95337525	.	-	.	gene_id "ENSMODG00000009640"; transcript_id "mdCircRNA-199"; exon_number "6" gene_name "ATRNL1"; gene_biotype "protein_coding"; oId "ce:circATRNL1-798-001|ts:circATRNL1-2059-001"; tissue "ce|ts";
2	ncSplice	gene	107294862	107297561	.	+	.	gene_id "ENSMODG00000000996"; gene_name "PPFIA4"; gene_source "ncSplice"; gene_biotype "protein_coding";
2	ncSplice	transcript	107294862	107297561	.	+	.	gene_id "ENSMODG00000000996"; transcript_id "mdCircRNA-200"; gene_name "PPFIA4"; gene_biotype "protein_coding"; transcript_biotype "circRNA"; oId "ce:circPPFIA4-814-001"; tissue "ce";
2	ncSplice	exon	107294862	107294959	.	+	.	gene_id "ENSMODG00000000996"; transcript_id "mdCircRNA-200"; exon_number "1" gene_name "PPFIA4"; gene_biotype "protein_coding"; oId "ce:circPPFIA4-814-001"; tissue "ce";
2	ncSplice	exon	107295599	107295774	.	+	.	gene_id "ENSMODG00000000996"; transcript_id "mdCircRNA-200"; exon_number "2" gene_name "PPFIA4"; gene_biotype "protein_coding"; oId "ce:circPPFIA4-814-001"; tissue "ce";
2	ncSplice	exon	107297493	107297561	.	+	.	gene_id "ENSMODG00000000996"; transcript_id "mdCircRNA-200"; exon_number "3" gene_name "PPFIA4"; gene_biotype "protein_coding"; oId "ce:circPPFIA4-814-001"; tissue "ce";
2	ncSplice	gene	111478425	111478831	.	+	.	gene_id "ENSMODG00000001795"; gene_name "CDK18"; gene_source "ncSplice"; gene_biotype "protein_coding";
2	ncSplice	transcript	111478425	111478831	.	+	.	gene_id "ENSMODG00000001795"; transcript_id "mdCircRNA-201"; gene_name "CDK18"; gene_biotype "protein_coding"; transcript_biotype "circRNA"; oId "ce:circCDK18-816-001"; tissue "ce";
2	ncSplice	exon	111478425	111478548	.	+	.	gene_id "ENSMODG00000001795"; transcript_id "mdCircRNA-201"; exon_number "1" gene_name "CDK18"; gene_biotype "protein_coding"; oId "ce:circCDK18-816-001"; tissue "ce";
2	ncSplice	exon	111478711	111478831	.	+	.	gene_id "ENSMODG00000001795"; transcript_id "mdCircRNA-201"; exon_number "2" gene_name "CDK18"; gene_biotype "protein_coding"; oId "ce:circCDK18-816-001"; tissue "ce";
2	ncSplice	gene	111606730	111613110	.	+	.	gene_id "ENSMODG00000001804"; gene_name "MFSD4"; gene_source "ncSplice"; gene_biotype "protein_coding";
2	ncSplice	transcript	111606730	111613110	.	+	.	gene_id "ENSMODG00000001804"; transcript_id "mdCircRNA-202"; gene_name "MFSD4"; gene_biotype "protein_coding"; transcript_biotype "circRNA"; oId "ce:circMFSD4-817-001"; tissue "ce";
2	ncSplice	exon	111606730	111606928	.	+	.	gene_id "ENSMODG00000001804"; transcript_id "mdCircRNA-202"; exon_number "1" gene_name "MFSD4"; gene_biotype "protein_coding"; oId "ce:circMFSD4-817-001"; tissue "ce";
2	ncSplice	exon	111608112	111608351	.	+	.	gene_id "ENSMODG00000001804"; transcript_id "mdCircRNA-202"; exon_number "2" gene_name "MFSD4"; gene_biotype "protein_coding"; oId "ce:circMFSD4-817-001"; tissue "ce";
2	ncSplice	exon	111612942	111613110	.	+	.	gene_id "ENSMODG00000001804"; transcript_id "mdCircRNA-202"; exon_number "3" gene_name "MFSD4"; gene_biotype "protein_coding"; oId "ce:circMFSD4-817-001"; tissue "ce";
2	ncSplice	gene	111608112	111613110	.	+	.	gene_id "ENSMODG00000001804"; gene_name "MFSD4"; gene_source "ncSplice"; gene_biotype "protein_coding";
2	ncSplice	transcript	111608112	111613110	.	+	.	gene_id "ENSMODG00000001804"; transcript_id "mdCircRNA-203"; gene_name "MFSD4"; gene_biotype "protein_coding"; transcript_biotype "circRNA"; oId "ce:circMFSD4-818-001"; tissue "ce";
2	ncSplice	exon	111608112	111608351	.	+	.	gene_id "ENSMODG00000001804"; transcript_id "mdCircRNA-203"; exon_number "1" gene_name "MFSD4"; gene_biotype "protein_coding"; oId "ce:circMFSD4-818-001"; tissue "ce";
2	ncSplice	exon	111612942	111613110	.	+	.	gene_id "ENSMODG00000001804"; transcript_id "mdCircRNA-203"; exon_number "2" gene_name "MFSD4"; gene_biotype "protein_coding"; oId "ce:circMFSD4-818-001"; tissue "ce";
2	ncSplice	gene	12036888	12046663	.	+	.	gene_id "ENSMODG00000011826"; gene_name "GLMN"; gene_source "ncSplice"; gene_biotype "protein_coding";
2	ncSplice	transcript	12036888	12046663	.	+	.	gene_id "ENSMODG00000011826"; transcript_id "mdCircRNA-204"; gene_name "GLMN"; gene_biotype "protein_coding"; transcript_biotype "circRNA"; oId "ce:circGLMN-829-001"; tissue "ce";
2	ncSplice	exon	12036888	12037007	.	+	.	gene_id "ENSMODG00000011826"; transcript_id "mdCircRNA-204"; exon_number "1" gene_name "GLMN"; gene_biotype "protein_coding"; oId "ce:circGLMN-829-001"; tissue "ce";
2	ncSplice	exon	12038321	12038429	.	+	.	gene_id "ENSMODG00000011826"; transcript_id "mdCircRNA-204"; exon_number "2" gene_name "GLMN"; gene_biotype "protein_coding"; oId "ce:circGLMN-829-001"; tissue "ce";
2	ncSplice	exon	12040763	12041009	.	+	.	gene_id "ENSMODG00000011826"; transcript_id "mdCircRNA-204"; exon_number "3" gene_name "GLMN"; gene_biotype "protein_coding"; oId "ce:circGLMN-829-001"; tissue "ce";
2	ncSplice	exon	12041573	12041675	.	+	.	gene_id "ENSMODG00000011826"; transcript_id "mdCircRNA-204"; exon_number "4" gene_name "GLMN"; gene_biotype "protein_coding"; oId "ce:circGLMN-829-001"; tissue "ce";
2	ncSplice	exon	12046476	12046663	.	+	.	gene_id "ENSMODG00000011826"; transcript_id "mdCircRNA-204"; exon_number "5" gene_name "GLMN"; gene_biotype "protein_coding"; oId "ce:circGLMN-829-001"; tissue "ce";
2	ncSplice	gene	121360065	121360841	.	-	.	gene_id "ENSMODG00000003145"; gene_name "ANGEL2"; gene_source "ncSplice"; gene_biotype "protein_coding";
2	ncSplice	transcript	121360065	121360841	.	-	.	gene_id "ENSMODG00000003145"; transcript_id "mdCircRNA-205"; gene_name "ANGEL2"; gene_biotype "protein_coding"; transcript_biotype "circRNA"; oId "ce:circANGEL2-830-001|ts:circANGEL2-2133-001"; tissue "ce|ts";
2	ncSplice	exon	121360065	121360483	.	-	.	gene_id "ENSMODG00000003145"; transcript_id "mdCircRNA-205"; exon_number "1" gene_name "ANGEL2"; gene_biotype "protein_coding"; oId "ce:circANGEL2-830-001|ts:circANGEL2-2133-001"; tissue "ce|ts";
2	ncSplice	exon	121360772	121360841	.	-	.	gene_id "ENSMODG00000003145"; transcript_id "mdCircRNA-205"; exon_number "2" gene_name "ANGEL2"; gene_biotype "protein_coding"; oId "ce:circANGEL2-830-001|ts:circANGEL2-2133-001"; tissue "ce|ts";
2	ncSplice	gene	139808324	139809983	.	-	.	gene_id "ENSMODG00000006246"; gene_name "CDC42BPA"; gene_source "ncSplice"; gene_biotype "protein_coding";
2	ncSplice	transcript	139808324	139809983	.	-	.	gene_id "ENSMODG00000006246"; transcript_id "mdCircRNA-206"; gene_name "CDC42BPA"; gene_biotype "protein_coding"; transcript_biotype "circRNA"; oId "ce:circCDC42BPA-853-001"; tissue "ce";
2	ncSplice	exon	139808324	139808572	.	-	.	gene_id "ENSMODG00000006246"; transcript_id "mdCircRNA-206"; exon_number "1" gene_name "CDC42BPA"; gene_biotype "protein_coding"; oId "ce:circCDC42BPA-853-001"; tissue "ce";
2	ncSplice	exon	139809783	139809983	.	-	.	gene_id "ENSMODG00000006246"; transcript_id "mdCircRNA-206"; exon_number "2" gene_name "CDC42BPA"; gene_biotype "protein_coding"; oId "ce:circCDC42BPA-853-001"; tissue "ce";
2	ncSplice	gene	139808324	139897387	.	-	.	gene_id "ENSMODG00000006246"; gene_name "CDC42BPA"; gene_source "ncSplice"; gene_biotype "protein_coding";
2	ncSplice	transcript	139808324	139897387	.	-	.	gene_id "ENSMODG00000006246"; transcript_id "mdCircRNA-207"; gene_name "CDC42BPA"; gene_biotype "protein_coding"; transcript_biotype "circRNA"; oId "ce:circCDC42BPA-855-001"; tissue "ce";
2	ncSplice	exon	139808324	139808572	.	-	.	gene_id "ENSMODG00000006246"; transcript_id "mdCircRNA-207"; exon_number "1" gene_name "CDC42BPA"; gene_biotype "protein_coding"; oId "ce:circCDC42BPA-855-001"; tissue "ce";
2	ncSplice	exon	139809783	139809983	.	-	.	gene_id "ENSMODG00000006246"; transcript_id "mdCircRNA-207"; exon_number "2" gene_name "CDC42BPA"; gene_biotype "protein_coding"; oId "ce:circCDC42BPA-855-001"; tissue "ce";
2	ncSplice	exon	139818411	139818504	.	-	.	gene_id "ENSMODG00000006246"; transcript_id "mdCircRNA-207"; exon_number "3" gene_name "CDC42BPA"; gene_biotype "protein_coding"; oId "ce:circCDC42BPA-855-001"; tissue "ce";
2	ncSplice	exon	139868092	139868240	.	-	.	gene_id "ENSMODG00000006246"; transcript_id "mdCircRNA-207"; exon_number "4" gene_name "CDC42BPA"; gene_biotype "protein_coding"; oId "ce:circCDC42BPA-855-001"; tissue "ce";
2	ncSplice	exon	139885095	139885190	.	-	.	gene_id "ENSMODG00000006246"; transcript_id "mdCircRNA-207"; exon_number "5" gene_name "CDC42BPA"; gene_biotype "protein_coding"; oId "ce:circCDC42BPA-855-001"; tissue "ce";
2	ncSplice	exon	139897304	139897387	.	-	.	gene_id "ENSMODG00000006246"; transcript_id "mdCircRNA-207"; exon_number "6" gene_name "CDC42BPA"; gene_biotype "protein_coding"; oId "ce:circCDC42BPA-855-001"; tissue "ce";
2	ncSplice	gene	139868092	139897387	.	-	.	gene_id "ENSMODG00000006246"; gene_name "CDC42BPA"; gene_source "ncSplice"; gene_biotype "protein_coding";
2	ncSplice	transcript	139868092	139897387	.	-	.	gene_id "ENSMODG00000006246"; transcript_id "mdCircRNA-208"; gene_name "CDC42BPA"; gene_biotype "protein_coding"; transcript_biotype "circRNA"; oId "ce:circCDC42BPA-858-001|ts:circCDC42BPA-2206-001"; tissue "ce|ts";
2	ncSplice	exon	139868092	139868240	.	-	.	gene_id "ENSMODG00000006246"; transcript_id "mdCircRNA-208"; exon_number "1" gene_name "CDC42BPA"; gene_biotype "protein_coding"; oId "ce:circCDC42BPA-858-001|ts:circCDC42BPA-2206-001"; tissue "ce|ts";
2	ncSplice	exon	139885095	139885190	.	-	.	gene_id "ENSMODG00000006246"; transcript_id "mdCircRNA-208"; exon_number "2" gene_name "CDC42BPA"; gene_biotype "protein_coding"; oId "ce:circCDC42BPA-858-001|ts:circCDC42BPA-2206-001"; tissue "ce|ts";
2	ncSplice	exon	139897304	139897387	.	-	.	gene_id "ENSMODG00000006246"; transcript_id "mdCircRNA-208"; exon_number "3" gene_name "CDC42BPA"; gene_biotype "protein_coding"; oId "ce:circCDC42BPA-858-001|ts:circCDC42BPA-2206-001"; tissue "ce|ts";
2	ncSplice	gene	139868092	139952812	.	-	.	gene_id "ENSMODG00000006246"; gene_name "CDC42BPA"; gene_source "ncSplice"; gene_biotype "protein_coding";
2	ncSplice	transcript	139868092	139952812	.	-	.	gene_id "ENSMODG00000006246"; transcript_id "mdCircRNA-209"; gene_name "CDC42BPA"; gene_biotype "protein_coding"; transcript_biotype "circRNA"; oId "ce:circCDC42BPA-859-001|ts:circCDC42BPA-2207-001"; tissue "ce|ts";
2	ncSplice	exon	139868092	139868240	.	-	.	gene_id "ENSMODG00000006246"; transcript_id "mdCircRNA-209"; exon_number "1" gene_name "CDC42BPA"; gene_biotype "protein_coding"; oId "ce:circCDC42BPA-859-001|ts:circCDC42BPA-2207-001"; tissue "ce|ts";
2	ncSplice	exon	139885095	139885190	.	-	.	gene_id "ENSMODG00000006246"; transcript_id "mdCircRNA-209"; exon_number "2" gene_name "CDC42BPA"; gene_biotype "protein_coding"; oId "ce:circCDC42BPA-859-001|ts:circCDC42BPA-2207-001"; tissue "ce|ts";
2	ncSplice	exon	139897304	139897387	.	-	.	gene_id "ENSMODG00000006246"; transcript_id "mdCircRNA-209"; exon_number "3" gene_name "CDC42BPA"; gene_biotype "protein_coding"; oId "ce:circCDC42BPA-859-001|ts:circCDC42BPA-2207-001"; tissue "ce|ts";
2	ncSplice	exon	139952721	139952812	.	-	.	gene_id "ENSMODG00000006246"; transcript_id "mdCircRNA-209"; exon_number "4" gene_name "CDC42BPA"; gene_biotype "protein_coding"; oId "ce:circCDC42BPA-859-001|ts:circCDC42BPA-2207-001"; tissue "ce|ts";
2	ncSplice	gene	139885095	139897387	.	-	.	gene_id "ENSMODG00000006246"; gene_name "CDC42BPA"; gene_source "ncSplice"; gene_biotype "protein_coding";
2	ncSplice	transcript	139885095	139897387	.	-	.	gene_id "ENSMODG00000006246"; transcript_id "mdCircRNA-210"; gene_name "CDC42BPA"; gene_biotype "protein_coding"; transcript_biotype "circRNA"; oId "ce:circCDC42BPA-861-001"; tissue "ce";
2	ncSplice	exon	139885095	139885190	.	-	.	gene_id "ENSMODG00000006246"; transcript_id "mdCircRNA-210"; exon_number "1" gene_name "CDC42BPA"; gene_biotype "protein_coding"; oId "ce:circCDC42BPA-861-001"; tissue "ce";
2	ncSplice	exon	139897304	139897387	.	-	.	gene_id "ENSMODG00000006246"; transcript_id "mdCircRNA-210"; exon_number "2" gene_name "CDC42BPA"; gene_biotype "protein_coding"; oId "ce:circCDC42BPA-861-001"; tissue "ce";
2	ncSplice	gene	139885095	139952812	.	-	.	gene_id "ENSMODG00000006246"; gene_name "CDC42BPA"; gene_source "ncSplice"; gene_biotype "protein_coding";
2	ncSplice	transcript	139885095	139952812	.	-	.	gene_id "ENSMODG00000006246"; transcript_id "mdCircRNA-211"; gene_name "CDC42BPA"; gene_biotype "protein_coding"; transcript_biotype "circRNA"; oId "ce:circCDC42BPA-862-001|ts:circCDC42BPA-2210-001"; tissue "ce|ts";
2	ncSplice	exon	139885095	139885190	.	-	.	gene_id "ENSMODG00000006246"; transcript_id "mdCircRNA-211"; exon_number "1" gene_name "CDC42BPA"; gene_biotype "protein_coding"; oId "ce:circCDC42BPA-862-001|ts:circCDC42BPA-2210-001"; tissue "ce|ts";
2	ncSplice	exon	139897304	139897387	.	-	.	gene_id "ENSMODG00000006246"; transcript_id "mdCircRNA-211"; exon_number "2" gene_name "CDC42BPA"; gene_biotype "protein_coding"; oId "ce:circCDC42BPA-862-001|ts:circCDC42BPA-2210-001"; tissue "ce|ts";
2	ncSplice	exon	139952721	139952812	.	-	.	gene_id "ENSMODG00000006246"; transcript_id "mdCircRNA-211"; exon_number "3" gene_name "CDC42BPA"; gene_biotype "protein_coding"; oId "ce:circCDC42BPA-862-001|ts:circCDC42BPA-2210-001"; tissue "ce|ts";
2	ncSplice	gene	144395193	144441383	.	+	.	gene_id "ENSMODG00000006626"; gene_name "AKT3"; gene_source "ncSplice"; gene_biotype "protein_coding";
2	ncSplice	transcript	144395193	144441383	.	+	.	gene_id "ENSMODG00000006626"; transcript_id "mdCircRNA-212"; gene_name "AKT3"; gene_biotype "protein_coding"; transcript_biotype "circRNA"; oId "ce:circAKT3-872-001|ts:circAKT3-2232-001"; tissue "ce|ts";
2	ncSplice	exon	144395193	144395318	.	+	.	gene_id "ENSMODG00000006626"; transcript_id "mdCircRNA-212"; exon_number "1" gene_name "AKT3"; gene_biotype "protein_coding"; oId "ce:circAKT3-872-001|ts:circAKT3-2232-001"; tissue "ce|ts";
2	ncSplice	exon	144437844	144437955	.	+	.	gene_id "ENSMODG00000006626"; transcript_id "mdCircRNA-212"; exon_number "2" gene_name "AKT3"; gene_biotype "protein_coding"; oId "ce:circAKT3-872-001|ts:circAKT3-2232-001"; tissue "ce|ts";
2	ncSplice	exon	144441239	144441383	.	+	.	gene_id "ENSMODG00000006626"; transcript_id "mdCircRNA-212"; exon_number "3" gene_name "AKT3"; gene_biotype "protein_coding"; oId "ce:circAKT3-872-001|ts:circAKT3-2232-001"; tissue "ce|ts";
2	ncSplice	gene	144395193	144448325	.	+	.	gene_id "ENSMODG00000006626"; gene_name "AKT3"; gene_source "ncSplice"; gene_biotype "protein_coding";
2	ncSplice	transcript	144395193	144448325	.	+	.	gene_id "ENSMODG00000006626"; transcript_id "mdCircRNA-213"; gene_name "AKT3"; gene_biotype "protein_coding"; transcript_biotype "circRNA"; oId "ce:circAKT3-873-001|ts:circAKT3-2233-001"; tissue "ce|ts";
2	ncSplice	exon	144395193	144395318	.	+	.	gene_id "ENSMODG00000006626"; transcript_id "mdCircRNA-213"; exon_number "1" gene_name "AKT3"; gene_biotype "protein_coding"; oId "ce:circAKT3-873-001|ts:circAKT3-2233-001"; tissue "ce|ts";
2	ncSplice	exon	144437844	144437955	.	+	.	gene_id "ENSMODG00000006626"; transcript_id "mdCircRNA-213"; exon_number "2" gene_name "AKT3"; gene_biotype "protein_coding"; oId "ce:circAKT3-873-001|ts:circAKT3-2233-001"; tissue "ce|ts";
2	ncSplice	exon	144441239	144441383	.	+	.	gene_id "ENSMODG00000006626"; transcript_id "mdCircRNA-213"; exon_number "3" gene_name "AKT3"; gene_biotype "protein_coding"; oId "ce:circAKT3-873-001|ts:circAKT3-2233-001"; tissue "ce|ts";
2	ncSplice	exon	144448194	144448325	.	+	.	gene_id "ENSMODG00000006626"; transcript_id "mdCircRNA-213"; exon_number "4" gene_name "AKT3"; gene_biotype "protein_coding"; oId "ce:circAKT3-873-001|ts:circAKT3-2233-001"; tissue "ce|ts";
2	ncSplice	gene	147571051	147572663	.	+	.	gene_id "ENSMODG00000007084"; gene_name "RGS7"; gene_source "ncSplice"; gene_biotype "protein_coding";
2	ncSplice	transcript	147571051	147572663	.	+	.	gene_id "ENSMODG00000007084"; transcript_id "mdCircRNA-214"; gene_name "RGS7"; gene_biotype "protein_coding"; transcript_biotype "circRNA"; oId "ce:circRGS7-886-001"; tissue "ce";
2	ncSplice	exon	147571051	147571115	.	+	.	gene_id "ENSMODG00000007084"; transcript_id "mdCircRNA-214"; exon_number "1" gene_name "RGS7"; gene_biotype "protein_coding"; oId "ce:circRGS7-886-001"; tissue "ce";
2	ncSplice	exon	147572395	147572471	.	+	.	gene_id "ENSMODG00000007084"; transcript_id "mdCircRNA-214"; exon_number "2" gene_name "RGS7"; gene_biotype "protein_coding"; oId "ce:circRGS7-886-001"; tissue "ce";
2	ncSplice	exon	147572582	147572663	.	+	.	gene_id "ENSMODG00000007084"; transcript_id "mdCircRNA-214"; exon_number "3" gene_name "RGS7"; gene_biotype "protein_coding"; oId "ce:circRGS7-886-001"; tissue "ce";
2	ncSplice	gene	151795811	151817733	.	-	.	gene_id "ENSMODG00000007421"; gene_name "RYR2"; gene_source "ncSplice"; gene_biotype "protein_coding";
2	ncSplice	transcript	151795811	151817733	.	-	.	gene_id "ENSMODG00000007421"; transcript_id "mdCircRNA-215"; gene_name "RYR2"; gene_biotype "protein_coding"; transcript_biotype "circRNA"; oId "ce:circRYR2-889-001|ts:circRYR2-2273-001"; tissue "ce|ts";
2	ncSplice	exon	151795811	151795884	.	-	.	gene_id "ENSMODG00000007421"; transcript_id "mdCircRNA-215"; exon_number "1" gene_name "RYR2"; gene_biotype "protein_coding"; oId "ce:circRYR2-889-001|ts:circRYR2-2273-001"; tissue "ce|ts";
2	ncSplice	exon	151801941	151802017	.	-	.	gene_id "ENSMODG00000007421"; transcript_id "mdCircRNA-215"; exon_number "2" gene_name "RYR2"; gene_biotype "protein_coding"; oId "ce:circRYR2-889-001|ts:circRYR2-2273-001"; tissue "ce|ts";
2	ncSplice	exon	151814886	151814965	.	-	.	gene_id "ENSMODG00000007421"; transcript_id "mdCircRNA-215"; exon_number "3" gene_name "RYR2"; gene_biotype "protein_coding"; oId "ce:circRYR2-889-001|ts:circRYR2-2273-001"; tissue "ce|ts";
2	ncSplice	exon	151817634	151817733	.	-	.	gene_id "ENSMODG00000007421"; transcript_id "mdCircRNA-215"; exon_number "4" gene_name "RYR2"; gene_biotype "protein_coding"; oId "ce:circRYR2-889-001|ts:circRYR2-2273-001"; tissue "ce|ts";
2	ncSplice	gene	154055593	154082120	.	+	.	gene_id "ENSMODG00000008251"; gene_name "LYST"; gene_source "ncSplice"; gene_biotype "protein_coding";
2	ncSplice	transcript	154055593	154082120	.	+	.	gene_id "ENSMODG00000008251"; transcript_id "mdCircRNA-216"; gene_name "LYST"; gene_biotype "protein_coding"; transcript_biotype "circRNA"; oId "ce:circLYST-896-001"; tissue "ce";
2	ncSplice	exon	154055593	154055659	.	+	.	gene_id "ENSMODG00000008251"; transcript_id "mdCircRNA-216"; exon_number "1" gene_name "LYST"; gene_biotype "protein_coding"; oId "ce:circLYST-896-001"; tissue "ce";
2	ncSplice	exon	154063429	154063538	.	+	.	gene_id "ENSMODG00000008251"; transcript_id "mdCircRNA-216"; exon_number "2" gene_name "LYST"; gene_biotype "protein_coding"; oId "ce:circLYST-896-001"; tissue "ce";
2	ncSplice	exon	154065134	154065560	.	+	.	gene_id "ENSMODG00000008251"; transcript_id "mdCircRNA-216"; exon_number "3" gene_name "LYST"; gene_biotype "protein_coding"; oId "ce:circLYST-896-001"; tissue "ce";
2	ncSplice	exon	154075721	154075865	.	+	.	gene_id "ENSMODG00000008251"; transcript_id "mdCircRNA-216"; exon_number "4" gene_name "LYST"; gene_biotype "protein_coding"; oId "ce:circLYST-896-001"; tissue "ce";
2	ncSplice	exon	154076646	154076819	.	+	.	gene_id "ENSMODG00000008251"; transcript_id "mdCircRNA-216"; exon_number "5" gene_name "LYST"; gene_biotype "protein_coding"; oId "ce:circLYST-896-001"; tissue "ce";
2	ncSplice	exon	154081960	154082120	.	+	.	gene_id "ENSMODG00000008251"; transcript_id "mdCircRNA-216"; exon_number "6" gene_name "LYST"; gene_biotype "protein_coding"; oId "ce:circLYST-896-001"; tissue "ce";
2	ncSplice	gene	157833600	157906364	.	+	.	gene_id "ENSMODG00000008590"; gene_name "PCNXL2"; gene_source "ncSplice"; gene_biotype "protein_coding";
2	ncSplice	transcript	157833600	157906364	.	+	.	gene_id "ENSMODG00000008590"; transcript_id "mdCircRNA-217"; gene_name "PCNXL2"; gene_biotype "protein_coding"; transcript_biotype "circRNA"; oId "ce:circPCNXL2-907-001"; tissue "ce";
2	ncSplice	exon	157833600	157833771	.	+	.	gene_id "ENSMODG00000008590"; transcript_id "mdCircRNA-217"; exon_number "1" gene_name "PCNXL2"; gene_biotype "protein_coding"; oId "ce:circPCNXL2-907-001"; tissue "ce";
2	ncSplice	exon	157850213	157850323	.	+	.	gene_id "ENSMODG00000008590"; transcript_id "mdCircRNA-217"; exon_number "2" gene_name "PCNXL2"; gene_biotype "protein_coding"; oId "ce:circPCNXL2-907-001"; tissue "ce";
2	ncSplice	exon	157852356	157852447	.	+	.	gene_id "ENSMODG00000008590"; transcript_id "mdCircRNA-217"; exon_number "3" gene_name "PCNXL2"; gene_biotype "protein_coding"; oId "ce:circPCNXL2-907-001"; tissue "ce";
2	ncSplice	exon	157890821	157890930	.	+	.	gene_id "ENSMODG00000008590"; transcript_id "mdCircRNA-217"; exon_number "4" gene_name "PCNXL2"; gene_biotype "protein_coding"; oId "ce:circPCNXL2-907-001"; tissue "ce";
2	ncSplice	exon	157892643	157892739	.	+	.	gene_id "ENSMODG00000008590"; transcript_id "mdCircRNA-217"; exon_number "5" gene_name "PCNXL2"; gene_biotype "protein_coding"; oId "ce:circPCNXL2-907-001"; tissue "ce";
2	ncSplice	exon	157904114	157904206	.	+	.	gene_id "ENSMODG00000008590"; transcript_id "mdCircRNA-217"; exon_number "6" gene_name "PCNXL2"; gene_biotype "protein_coding"; oId "ce:circPCNXL2-907-001"; tissue "ce";
2	ncSplice	exon	157906214	157906364	.	+	.	gene_id "ENSMODG00000008590"; transcript_id "mdCircRNA-217"; exon_number "7" gene_name "PCNXL2"; gene_biotype "protein_coding"; oId "ce:circPCNXL2-907-001"; tissue "ce";
2	ncSplice	gene	173136771	173161839	.	+	.	gene_id "ENSMODG00000014632"; gene_name "TRIM37"; gene_source "ncSplice"; gene_biotype "protein_coding";
2	ncSplice	transcript	173136771	173161839	.	+	.	gene_id "ENSMODG00000014632"; transcript_id "mdCircRNA-218"; gene_name "TRIM37"; gene_biotype "protein_coding"; transcript_biotype "circRNA"; oId "ce:circTRIM37-929-001|ts:circTRIM37-2348-001"; tissue "ce|ts";
2	ncSplice	exon	173136771	173136858	.	+	.	gene_id "ENSMODG00000014632"; transcript_id "mdCircRNA-218"; exon_number "1" gene_name "TRIM37"; gene_biotype "protein_coding"; oId "ce:circTRIM37-929-001|ts:circTRIM37-2348-001"; tissue "ce|ts";
2	ncSplice	exon	173138183	173138305	.	+	.	gene_id "ENSMODG00000014632"; transcript_id "mdCircRNA-218"; exon_number "2" gene_name "TRIM37"; gene_biotype "protein_coding"; oId "ce:circTRIM37-929-001|ts:circTRIM37-2348-001"; tissue "ce|ts";
2	ncSplice	exon	173144641	173144764	.	+	.	gene_id "ENSMODG00000014632"; transcript_id "mdCircRNA-218"; exon_number "3" gene_name "TRIM37"; gene_biotype "protein_coding"; oId "ce:circTRIM37-929-001|ts:circTRIM37-2348-001"; tissue "ce|ts";
2	ncSplice	exon	173161772	173161839	.	+	.	gene_id "ENSMODG00000014632"; transcript_id "mdCircRNA-218"; exon_number "4" gene_name "TRIM37"; gene_biotype "protein_coding"; oId "ce:circTRIM37-929-001|ts:circTRIM37-2348-001"; tissue "ce|ts";
2	ncSplice	gene	174831615	174836971	.	+	.	gene_id "2:174831614:174836971:1"; gene_name "2:174831614:174836971:1"; gene_source "ncSplice"; gene_biotype "novel";
2	ncSplice	transcript	174831615	174836971	.	+	.	gene_id "2:174831614:174836971:1"; transcript_id "mdCircRNA-219"; gene_name "2:174831614:174836971:1"; gene_biotype "novel"; transcript_biotype "circRNA"; oId "ce:circ2:174831614:174836971:1-931-001"; tissue "ce";
2	ncSplice	exon	174831615	174834997	.	+	.	gene_id "2:174831614:174836971:1"; transcript_id "mdCircRNA-219"; exon_number "1" gene_name "2:174831614:174836971:1"; gene_biotype "novel"; oId "ce:circ2:174831614:174836971:1-931-001"; tissue "ce";
2	ncSplice	exon	174835868	174835985	.	+	.	gene_id "2:174831614:174836971:1"; transcript_id "mdCircRNA-219"; exon_number "2" gene_name "2:174831614:174836971:1"; gene_biotype "novel"; oId "ce:circ2:174831614:174836971:1-931-001"; tissue "ce";
2	ncSplice	exon	174836812	174836971	.	+	.	gene_id "2:174831614:174836971:1"; transcript_id "mdCircRNA-219"; exon_number "3" gene_name "2:174831614:174836971:1"; gene_biotype "novel"; oId "ce:circ2:174831614:174836971:1-931-001"; tissue "ce";
2	ncSplice	gene	185854675	185898625	.	+	.	gene_id "ENSMODG00000003279"; gene_name "AATF"; gene_source "ncSplice"; gene_biotype "protein_coding";
2	ncSplice	transcript	185854675	185898625	.	+	.	gene_id "ENSMODG00000003279"; transcript_id "mdCircRNA-220"; gene_name "AATF"; gene_biotype "protein_coding"; transcript_biotype "circRNA"; oId "ce:circAATF-942-001"; tissue "ce";
2	ncSplice	exon	185854675	185854876	.	+	.	gene_id "ENSMODG00000003279"; transcript_id "mdCircRNA-220"; exon_number "1" gene_name "AATF"; gene_biotype "protein_coding"; oId "ce:circAATF-942-001"; tissue "ce";
2	ncSplice	exon	185855472	185855636	.	+	.	gene_id "ENSMODG00000003279"; transcript_id "mdCircRNA-220"; exon_number "2" gene_name "AATF"; gene_biotype "protein_coding"; oId "ce:circAATF-942-001"; tissue "ce";
2	ncSplice	exon	185858393	185858476	.	+	.	gene_id "ENSMODG00000003279"; transcript_id "mdCircRNA-220"; exon_number "3" gene_name "AATF"; gene_biotype "protein_coding"; oId "ce:circAATF-942-001"; tissue "ce";
2	ncSplice	exon	185874450	185874517	.	+	.	gene_id "ENSMODG00000003279"; transcript_id "mdCircRNA-220"; exon_number "4" gene_name "AATF"; gene_biotype "protein_coding"; oId "ce:circAATF-942-001"; tissue "ce";
2	ncSplice	exon	185876203	185876283	.	+	.	gene_id "ENSMODG00000003279"; transcript_id "mdCircRNA-220"; exon_number "5" gene_name "AATF"; gene_biotype "protein_coding"; oId "ce:circAATF-942-001"; tissue "ce";
2	ncSplice	exon	185898554	185898625	.	+	.	gene_id "ENSMODG00000003279"; transcript_id "mdCircRNA-220"; exon_number "6" gene_name "AATF"; gene_biotype "protein_coding"; oId "ce:circAATF-942-001"; tissue "ce";
2	ncSplice	gene	190234427	190248454	.	-	.	gene_id "ENSMODG00000017033"; gene_name "ASH1L"; gene_source "ncSplice"; gene_biotype "protein_coding";
2	ncSplice	transcript	190234427	190248454	.	-	.	gene_id "ENSMODG00000017033"; transcript_id "mdCircRNA-221"; gene_name "ASH1L"; gene_biotype "protein_coding"; transcript_biotype "circRNA"; oId "ce:circASH1L-958-001|ts:circASH1L-2406-001"; tissue "ce|ts";
2	ncSplice	exon	190234427	190234606	.	-	.	gene_id "ENSMODG00000017033"; transcript_id "mdCircRNA-221"; exon_number "1" gene_name "ASH1L"; gene_biotype "protein_coding"; oId "ce:circASH1L-958-001|ts:circASH1L-2406-001"; tissue "ce|ts";
2	ncSplice	exon	190241458	190242199	.	-	.	gene_id "ENSMODG00000017033"; transcript_id "mdCircRNA-221"; exon_number "2" gene_name "ASH1L"; gene_biotype "protein_coding"; oId "ce:circASH1L-958-001|ts:circASH1L-2406-001"; tissue "ce|ts";
2	ncSplice	exon	190242455	190248454	.	-	.	gene_id "ENSMODG00000017033"; transcript_id "mdCircRNA-221"; exon_number "3" gene_name "ASH1L"; gene_biotype "protein_coding"; oId "ce:circASH1L-958-001|ts:circASH1L-2406-001"; tissue "ce|ts";
2	ncSplice	gene	194827011	194827462	.	+	.	gene_id "ENSMODG00000014659"; gene_name "NA"; gene_source "ncSplice"; gene_biotype "protein_coding";
2	ncSplice	transcript	194827011	194827462	.	+	.	gene_id "ENSMODG00000014659"; transcript_id "mdCircRNA-222"; gene_name "NA"; gene_biotype "protein_coding"; transcript_biotype "circRNA"; oId "ce:circNA-972-001"; tissue "ce";
2	ncSplice	exon	194827011	194827141	.	+	.	gene_id "ENSMODG00000014659"; transcript_id "mdCircRNA-222"; exon_number "1" gene_name "NA"; gene_biotype "protein_coding"; oId "ce:circNA-972-001"; tissue "ce";
2	ncSplice	exon	194827388	194827462	.	+	.	gene_id "ENSMODG00000014659"; transcript_id "mdCircRNA-222"; exon_number "2" gene_name "NA"; gene_biotype "protein_coding"; oId "ce:circNA-972-001"; tissue "ce";
2	ncSplice	gene	226534207	226550528	.	-	.	gene_id "ENSMODG00000023922"; gene_name "NA"; gene_source "ncSplice"; gene_biotype "protein_coding";
2	ncSplice	transcript	226534207	226550528	.	-	.	gene_id "ENSMODG00000023922"; transcript_id "mdCircRNA-223"; gene_name "NA"; gene_biotype "protein_coding"; transcript_biotype "circRNA"; oId "ce:circNA-1011-001|ts:circNA-2521-001"; tissue "ce|ts";
2	ncSplice	exon	226534207	226534356	.	-	.	gene_id "ENSMODG00000023922"; transcript_id "mdCircRNA-223"; exon_number "1" gene_name "NA"; gene_biotype "protein_coding"; oId "ce:circNA-1011-001|ts:circNA-2521-001"; tissue "ce|ts";
2	ncSplice	exon	226548119	226548160	.	-	.	gene_id "ENSMODG00000023922"; transcript_id "mdCircRNA-223"; exon_number "2" gene_name "NA"; gene_biotype "protein_coding"; oId "ce:circNA-1011-001|ts:circNA-2521-001"; tissue "ce|ts";
2	ncSplice	exon	226550466	226550528	.	-	.	gene_id "ENSMODG00000023922"; transcript_id "mdCircRNA-223"; exon_number "3" gene_name "NA"; gene_biotype "protein_coding"; oId "ce:circNA-1011-001|ts:circNA-2521-001"; tissue "ce|ts";
2	ncSplice	gene	230974954	230979498	.	+	.	gene_id "ENSMODG00000003443"; gene_name "CCDC57"; gene_source "ncSplice"; gene_biotype "protein_coding";
2	ncSplice	transcript	230974954	230979498	.	+	.	gene_id "ENSMODG00000003443"; transcript_id "mdCircRNA-224"; gene_name "CCDC57"; gene_biotype "protein_coding"; transcript_biotype "circRNA"; oId "ce:circCCDC57-1026-001|ts:circCCDC57-2567-001"; tissue "ce|ts";
2	ncSplice	exon	230974954	230975073	.	+	.	gene_id "ENSMODG00000003443"; transcript_id "mdCircRNA-224"; exon_number "1" gene_name "CCDC57"; gene_biotype "protein_coding"; oId "ce:circCCDC57-1026-001|ts:circCCDC57-2567-001"; tissue "ce|ts";
2	ncSplice	exon	230979282	230979498	.	+	.	gene_id "ENSMODG00000003443"; transcript_id "mdCircRNA-224"; exon_number "2" gene_name "CCDC57"; gene_biotype "protein_coding"; oId "ce:circCCDC57-1026-001|ts:circCCDC57-2567-001"; tissue "ce|ts";
2	ncSplice	gene	25442642	25448786	.	-	.	gene_id "ENSMODG00000001072"; gene_name "PDE4B"; gene_source "ncSplice"; gene_biotype "protein_coding";
2	ncSplice	transcript	25442642	25448786	.	-	.	gene_id "ENSMODG00000001072"; transcript_id "mdCircRNA-225"; gene_name "PDE4B"; gene_biotype "protein_coding"; transcript_biotype "circRNA"; oId "ce:circPDE4B-1047-001"; tissue "ce";
2	ncSplice	exon	25442642	25442880	.	-	.	gene_id "ENSMODG00000001072"; transcript_id "mdCircRNA-225"; exon_number "1" gene_name "PDE4B"; gene_biotype "protein_coding"; oId "ce:circPDE4B-1047-001"; tissue "ce";
2	ncSplice	exon	25448674	25448786	.	-	.	gene_id "ENSMODG00000001072"; transcript_id "mdCircRNA-225"; exon_number "2" gene_name "PDE4B"; gene_biotype "protein_coding"; oId "ce:circPDE4B-1047-001"; tissue "ce";
2	ncSplice	gene	272373140	272377809	.	-	.	gene_id "ENSMODG00000013970"; gene_name "GRM4"; gene_source "ncSplice"; gene_biotype "protein_coding";
2	ncSplice	transcript	272373140	272377809	.	-	.	gene_id "ENSMODG00000013970"; transcript_id "mdCircRNA-226"; gene_name "GRM4"; gene_biotype "protein_coding"; transcript_biotype "circRNA"; oId "ce:circGRM4-1086-001"; tissue "ce";
2	ncSplice	exon	272373140	272373280	.	-	.	gene_id "ENSMODG00000013970"; transcript_id "mdCircRNA-226"; exon_number "1" gene_name "GRM4"; gene_biotype "protein_coding"; oId "ce:circGRM4-1086-001"; tissue "ce";
2	ncSplice	exon	272377655	272377809	.	-	.	gene_id "ENSMODG00000013970"; transcript_id "mdCircRNA-226"; exon_number "2" gene_name "GRM4"; gene_biotype "protein_coding"; oId "ce:circGRM4-1086-001"; tissue "ce";
2	ncSplice	gene	272808720	272811418	.	-	.	gene_id "ENSMODG00000013933"; gene_name "NUDT3"; gene_source "ncSplice"; gene_biotype "protein_coding";
2	ncSplice	transcript	272808720	272811418	.	-	.	gene_id "ENSMODG00000013933"; transcript_id "mdCircRNA-227"; gene_name "NUDT3"; gene_biotype "protein_coding"; transcript_biotype "circRNA"; oId "ce:circNUDT3-1088-001"; tissue "ce";
2	ncSplice	exon	272808720	272809984	.	-	.	gene_id "ENSMODG00000013933"; transcript_id "mdCircRNA-227"; exon_number "1" gene_name "NUDT3"; gene_biotype "protein_coding"; oId "ce:circNUDT3-1088-001"; tissue "ce";
2	ncSplice	exon	272811374	272811418	.	-	.	gene_id "ENSMODG00000013933"; transcript_id "mdCircRNA-227"; exon_number "2" gene_name "NUDT3"; gene_biotype "protein_coding"; oId "ce:circNUDT3-1088-001"; tissue "ce";
2	ncSplice	gene	306772986	306778794	.	-	.	gene_id "ENSMODG00000018775"; gene_name "DST"; gene_source "ncSplice"; gene_biotype "protein_coding";
2	ncSplice	transcript	306772986	306778794	.	-	.	gene_id "ENSMODG00000018775"; transcript_id "mdCircRNA-228"; gene_name "DST"; gene_biotype "protein_coding"; transcript_biotype "circRNA"; oId "ce:circDST-1132-001"; tissue "ce";
2	ncSplice	exon	306772986	306773057	.	-	.	gene_id "ENSMODG00000018775"; transcript_id "mdCircRNA-228"; exon_number "1" gene_name "DST"; gene_biotype "protein_coding"; oId "ce:circDST-1132-001"; tissue "ce";
2	ncSplice	exon	306774008	306774125	.	-	.	gene_id "ENSMODG00000018775"; transcript_id "mdCircRNA-228"; exon_number "2" gene_name "DST"; gene_biotype "protein_coding"; oId "ce:circDST-1132-001"; tissue "ce";
2	ncSplice	exon	306776955	306778794	.	-	.	gene_id "ENSMODG00000018775"; transcript_id "mdCircRNA-228"; exon_number "3" gene_name "DST"; gene_biotype "protein_coding"; oId "ce:circDST-1132-001"; tissue "ce";
2	ncSplice	gene	312476175	312486088	.	+	.	gene_id "ENSMODG00000018699"; gene_name "PHF3"; gene_source "ncSplice"; gene_biotype "protein_coding";
2	ncSplice	transcript	312476175	312486088	.	+	.	gene_id "ENSMODG00000018699"; transcript_id "mdCircRNA-229"; gene_name "PHF3"; gene_biotype "protein_coding"; transcript_biotype "circRNA"; oId "ce:circPHF3-1135-001|ts:circPHF3-2859-001"; tissue "ce|ts";
2	ncSplice	exon	312476175	312476484	.	+	.	gene_id "ENSMODG00000018699"; transcript_id "mdCircRNA-229"; exon_number "1" gene_name "PHF3"; gene_biotype "protein_coding"; oId "ce:circPHF3-1135-001|ts:circPHF3-2859-001"; tissue "ce|ts";
2	ncSplice	exon	312485905	312486088	.	+	.	gene_id "ENSMODG00000018699"; transcript_id "mdCircRNA-229"; exon_number "2" gene_name "PHF3"; gene_biotype "protein_coding"; oId "ce:circPHF3-1135-001|ts:circPHF3-2859-001"; tissue "ce|ts";
2	ncSplice	gene	323875053	323880179	.	+	.	gene_id "ENSMODG00000018557"; gene_name "RIMS1"; gene_source "ncSplice"; gene_biotype "protein_coding";
2	ncSplice	transcript	323875053	323880179	.	+	.	gene_id "ENSMODG00000018557"; transcript_id "mdCircRNA-230"; gene_name "RIMS1"; gene_biotype "protein_coding"; transcript_biotype "circRNA"; oId "ce:circRIMS1-1153-001"; tissue "ce";
2	ncSplice	exon	323875053	323875390	.	+	.	gene_id "ENSMODG00000018557"; transcript_id "mdCircRNA-230"; exon_number "1" gene_name "RIMS1"; gene_biotype "protein_coding"; oId "ce:circRIMS1-1153-001"; tissue "ce";
2	ncSplice	exon	323879311	323880179	.	+	.	gene_id "ENSMODG00000018557"; transcript_id "mdCircRNA-230"; exon_number "2" gene_name "RIMS1"; gene_biotype "protein_coding"; oId "ce:circRIMS1-1153-001"; tissue "ce";
2	ncSplice	gene	323983870	323991767	.	+	.	gene_id "ENSMODG00000018557"; gene_name "RIMS1"; gene_source "ncSplice"; gene_biotype "protein_coding";
2	ncSplice	transcript	323983870	323991767	.	+	.	gene_id "ENSMODG00000018557"; transcript_id "mdCircRNA-231"; gene_name "RIMS1"; gene_biotype "protein_coding"; transcript_biotype "circRNA"; oId "ce:circRIMS1-1154-001"; tissue "ce";
2	ncSplice	exon	323983870	323984026	.	+	.	gene_id "ENSMODG00000018557"; transcript_id "mdCircRNA-231"; exon_number "1" gene_name "RIMS1"; gene_biotype "protein_coding"; oId "ce:circRIMS1-1154-001"; tissue "ce";
2	ncSplice	exon	323985244	323985369	.	+	.	gene_id "ENSMODG00000018557"; transcript_id "mdCircRNA-231"; exon_number "2" gene_name "RIMS1"; gene_biotype "protein_coding"; oId "ce:circRIMS1-1154-001"; tissue "ce";
2	ncSplice	exon	323988195	323988257	.	+	.	gene_id "ENSMODG00000018557"; transcript_id "mdCircRNA-231"; exon_number "3" gene_name "RIMS1"; gene_biotype "protein_coding"; oId "ce:circRIMS1-1154-001"; tissue "ce";
2	ncSplice	exon	323991678	323991767	.	+	.	gene_id "ENSMODG00000018557"; transcript_id "mdCircRNA-231"; exon_number "4" gene_name "RIMS1"; gene_biotype "protein_coding"; oId "ce:circRIMS1-1154-001"; tissue "ce";
2	ncSplice	gene	324028802	324088045	.	+	.	gene_id "ENSMODG00000018557"; gene_name "RIMS1"; gene_source "ncSplice"; gene_biotype "protein_coding";
2	ncSplice	transcript	324028802	324088045	.	+	.	gene_id "ENSMODG00000018557"; transcript_id "mdCircRNA-232"; gene_name "RIMS1"; gene_biotype "protein_coding"; transcript_biotype "circRNA"; oId "ce:circRIMS1-1160-002"; tissue "ce";
2	ncSplice	exon	324028802	324028831	.	+	.	gene_id "ENSMODG00000018557"; transcript_id "mdCircRNA-232"; exon_number "1" gene_name "RIMS1"; gene_biotype "protein_coding"; oId "ce:circRIMS1-1160-002"; tissue "ce";
2	ncSplice	exon	324044724	324044836	.	+	.	gene_id "ENSMODG00000018557"; transcript_id "mdCircRNA-232"; exon_number "2" gene_name "RIMS1"; gene_biotype "protein_coding"; oId "ce:circRIMS1-1160-002"; tissue "ce";
2	ncSplice	exon	324065223	324065389	.	+	.	gene_id "ENSMODG00000018557"; transcript_id "mdCircRNA-232"; exon_number "3" gene_name "RIMS1"; gene_biotype "protein_coding"; oId "ce:circRIMS1-1160-002"; tissue "ce";
2	ncSplice	exon	324087810	324088045	.	+	.	gene_id "ENSMODG00000018557"; transcript_id "mdCircRNA-232"; exon_number "4" gene_name "RIMS1"; gene_biotype "protein_coding"; oId "ce:circRIMS1-1160-002"; tissue "ce";
2	ncSplice	gene	324029962	324088045	.	+	.	gene_id "ENSMODG00000018557"; gene_name "RIMS1"; gene_source "ncSplice"; gene_biotype "protein_coding";
2	ncSplice	transcript	324029962	324088045	.	+	.	gene_id "ENSMODG00000018557"; transcript_id "mdCircRNA-233"; gene_name "RIMS1"; gene_biotype "protein_coding"; transcript_biotype "circRNA"; oId "ce:circRIMS1-1161-001"; tissue "ce";
2	ncSplice	exon	324029962	324030042	.	+	.	gene_id "ENSMODG00000018557"; transcript_id "mdCircRNA-233"; exon_number "1" gene_name "RIMS1"; gene_biotype "protein_coding"; oId "ce:circRIMS1-1161-001"; tissue "ce";
2	ncSplice	exon	324044724	324044836	.	+	.	gene_id "ENSMODG00000018557"; transcript_id "mdCircRNA-233"; exon_number "2" gene_name "RIMS1"; gene_biotype "protein_coding"; oId "ce:circRIMS1-1161-001"; tissue "ce";
2	ncSplice	exon	324065223	324065389	.	+	.	gene_id "ENSMODG00000018557"; transcript_id "mdCircRNA-233"; exon_number "3" gene_name "RIMS1"; gene_biotype "protein_coding"; oId "ce:circRIMS1-1161-001"; tissue "ce";
2	ncSplice	exon	324087810	324088045	.	+	.	gene_id "ENSMODG00000018557"; transcript_id "mdCircRNA-233"; exon_number "4" gene_name "RIMS1"; gene_biotype "protein_coding"; oId "ce:circRIMS1-1161-001"; tissue "ce";
2	ncSplice	gene	324044724	324088045	.	+	.	gene_id "ENSMODG00000018557"; gene_name "RIMS1"; gene_source "ncSplice"; gene_biotype "protein_coding";
2	ncSplice	transcript	324044724	324088045	.	+	.	gene_id "ENSMODG00000018557"; transcript_id "mdCircRNA-234"; gene_name "RIMS1"; gene_biotype "protein_coding"; transcript_biotype "circRNA"; oId "ce:circRIMS1-1164-001"; tissue "ce";
2	ncSplice	exon	324044724	324044836	.	+	.	gene_id "ENSMODG00000018557"; transcript_id "mdCircRNA-234"; exon_number "1" gene_name "RIMS1"; gene_biotype "protein_coding"; oId "ce:circRIMS1-1164-001"; tissue "ce";
2	ncSplice	exon	324065223	324065389	.	+	.	gene_id "ENSMODG00000018557"; transcript_id "mdCircRNA-234"; exon_number "2" gene_name "RIMS1"; gene_biotype "protein_coding"; oId "ce:circRIMS1-1164-001"; tissue "ce";
2	ncSplice	exon	324087810	324088045	.	+	.	gene_id "ENSMODG00000018557"; transcript_id "mdCircRNA-234"; exon_number "3" gene_name "RIMS1"; gene_biotype "protein_coding"; oId "ce:circRIMS1-1164-001"; tissue "ce";
2	ncSplice	gene	333056367	333100731	.	-	.	gene_id "ENSMODG00000018435"; gene_name "PHIP"; gene_source "ncSplice"; gene_biotype "protein_coding";
2	ncSplice	transcript	333056367	333100731	.	-	.	gene_id "ENSMODG00000018435"; transcript_id "mdCircRNA-235"; gene_name "PHIP"; gene_biotype "protein_coding"; transcript_biotype "circRNA"; oId "ce:circPHIP-1168-001"; tissue "ce";
2	ncSplice	exon	333056367	333056550	.	-	.	gene_id "ENSMODG00000018435"; transcript_id "mdCircRNA-235"; exon_number "1" gene_name "PHIP"; gene_biotype "protein_coding"; oId "ce:circPHIP-1168-001"; tissue "ce";
2	ncSplice	exon	333057847	333057984	.	-	.	gene_id "ENSMODG00000018435"; transcript_id "mdCircRNA-235"; exon_number "2" gene_name "PHIP"; gene_biotype "protein_coding"; oId "ce:circPHIP-1168-001"; tissue "ce";
2	ncSplice	exon	333071031	333071256	.	-	.	gene_id "ENSMODG00000018435"; transcript_id "mdCircRNA-235"; exon_number "3" gene_name "PHIP"; gene_biotype "protein_coding"; oId "ce:circPHIP-1168-001"; tissue "ce";
2	ncSplice	exon	333073451	333073579	.	-	.	gene_id "ENSMODG00000018435"; transcript_id "mdCircRNA-235"; exon_number "4" gene_name "PHIP"; gene_biotype "protein_coding"; oId "ce:circPHIP-1168-001"; tissue "ce";
2	ncSplice	exon	333089712	333089846	.	-	.	gene_id "ENSMODG00000018435"; transcript_id "mdCircRNA-235"; exon_number "5" gene_name "PHIP"; gene_biotype "protein_coding"; oId "ce:circPHIP-1168-001"; tissue "ce";
2	ncSplice	exon	333090941	333091094	.	-	.	gene_id "ENSMODG00000018435"; transcript_id "mdCircRNA-235"; exon_number "6" gene_name "PHIP"; gene_biotype "protein_coding"; oId "ce:circPHIP-1168-001"; tissue "ce";
2	ncSplice	exon	333092500	333092598	.	-	.	gene_id "ENSMODG00000018435"; transcript_id "mdCircRNA-235"; exon_number "7" gene_name "PHIP"; gene_biotype "protein_coding"; oId "ce:circPHIP-1168-001"; tissue "ce";
2	ncSplice	exon	333093532	333093572	.	-	.	gene_id "ENSMODG00000018435"; transcript_id "mdCircRNA-235"; exon_number "8" gene_name "PHIP"; gene_biotype "protein_coding"; oId "ce:circPHIP-1168-001"; tissue "ce";
2	ncSplice	exon	333093663	333093763	.	-	.	gene_id "ENSMODG00000018435"; transcript_id "mdCircRNA-235"; exon_number "9" gene_name "PHIP"; gene_biotype "protein_coding"; oId "ce:circPHIP-1168-001"; tissue "ce";
2	ncSplice	exon	333094930	333095000	.	-	.	gene_id "ENSMODG00000018435"; transcript_id "mdCircRNA-235"; exon_number "10" gene_name "PHIP"; gene_biotype "protein_coding"; oId "ce:circPHIP-1168-001"; tissue "ce";
2	ncSplice	exon	333100631	333100731	.	-	.	gene_id "ENSMODG00000018435"; transcript_id "mdCircRNA-235"; exon_number "11" gene_name "PHIP"; gene_biotype "protein_coding"; oId "ce:circPHIP-1168-001"; tissue "ce";
2	ncSplice	gene	341917642	341931878	.	-	.	gene_id "ENSMODG00000018355"; gene_name "SNX14"; gene_source "ncSplice"; gene_biotype "protein_coding";
2	ncSplice	transcript	341917642	341931878	.	-	.	gene_id "ENSMODG00000018355"; transcript_id "mdCircRNA-236"; gene_name "SNX14"; gene_biotype "protein_coding"; transcript_biotype "circRNA"; oId "ce:circSNX14-1193-001"; tissue "ce";
2	ncSplice	exon	341917642	341917761	.	-	.	gene_id "ENSMODG00000018355"; transcript_id "mdCircRNA-236"; exon_number "1" gene_name "SNX14"; gene_biotype "protein_coding"; oId "ce:circSNX14-1193-001"; tissue "ce";
2	ncSplice	exon	341917873	341917913	.	-	.	gene_id "ENSMODG00000018355"; transcript_id "mdCircRNA-236"; exon_number "2" gene_name "SNX14"; gene_biotype "protein_coding"; oId "ce:circSNX14-1193-001"; tissue "ce";
2	ncSplice	exon	341923255	341923366	.	-	.	gene_id "ENSMODG00000018355"; transcript_id "mdCircRNA-236"; exon_number "3" gene_name "SNX14"; gene_biotype "protein_coding"; oId "ce:circSNX14-1193-001"; tissue "ce";
2	ncSplice	exon	341928537	341928637	.	-	.	gene_id "ENSMODG00000018355"; transcript_id "mdCircRNA-236"; exon_number "4" gene_name "SNX14"; gene_biotype "protein_coding"; oId "ce:circSNX14-1193-001"; tissue "ce";
2	ncSplice	exon	341931795	341931878	.	-	.	gene_id "ENSMODG00000018355"; transcript_id "mdCircRNA-236"; exon_number "5" gene_name "SNX14"; gene_biotype "protein_coding"; oId "ce:circSNX14-1193-001"; tissue "ce";
2	ncSplice	gene	361420558	361422425	.	-	.	gene_id "ENSMODG00000018098"; gene_name "USP45"; gene_source "ncSplice"; gene_biotype "protein_coding";
2	ncSplice	transcript	361420558	361422425	.	-	.	gene_id "ENSMODG00000018098"; transcript_id "mdCircRNA-237"; gene_name "USP45"; gene_biotype "protein_coding"; transcript_biotype "circRNA"; oId "ce:circUSP45-1206-001"; tissue "ce";
2	ncSplice	exon	361420558	361420658	.	-	.	gene_id "ENSMODG00000018098"; transcript_id "mdCircRNA-237"; exon_number "1" gene_name "USP45"; gene_biotype "protein_coding"; oId "ce:circUSP45-1206-001"; tissue "ce";
2	ncSplice	exon	361421403	361421506	.	-	.	gene_id "ENSMODG00000018098"; transcript_id "mdCircRNA-237"; exon_number "2" gene_name "USP45"; gene_biotype "protein_coding"; oId "ce:circUSP45-1206-001"; tissue "ce";
2	ncSplice	exon	361422256	361422425	.	-	.	gene_id "ENSMODG00000018098"; transcript_id "mdCircRNA-237"; exon_number "3" gene_name "USP45"; gene_biotype "protein_coding"; oId "ce:circUSP45-1206-001"; tissue "ce";
2	ncSplice	gene	387675108	387676924	.	-	.	gene_id "ENSMODG00000017783"; gene_name "FAM184A"; gene_source "ncSplice"; gene_biotype "protein_coding";
2	ncSplice	transcript	387675108	387676924	.	-	.	gene_id "ENSMODG00000017783"; transcript_id "mdCircRNA-238"; gene_name "FAM184A"; gene_biotype "protein_coding"; transcript_biotype "circRNA"; oId "ce:circFAM184A-1230-001"; tissue "ce";
2	ncSplice	exon	387675108	387675258	.	-	.	gene_id "ENSMODG00000017783"; transcript_id "mdCircRNA-238"; exon_number "1" gene_name "FAM184A"; gene_biotype "protein_coding"; oId "ce:circFAM184A-1230-001"; tissue "ce";
2	ncSplice	exon	387676803	387676924	.	-	.	gene_id "ENSMODG00000017783"; transcript_id "mdCircRNA-238"; exon_number "2" gene_name "FAM184A"; gene_biotype "protein_coding"; oId "ce:circFAM184A-1230-001"; tissue "ce";
2	ncSplice	gene	404859937	404899390	.	+	.	gene_id "ENSMODG00000017586"; gene_name "AKAP7"; gene_source "ncSplice"; gene_biotype "protein_coding";
2	ncSplice	transcript	404859937	404899390	.	+	.	gene_id "ENSMODG00000017586"; transcript_id "mdCircRNA-239"; gene_name "AKAP7"; gene_biotype "protein_coding"; transcript_biotype "circRNA"; oId "ce:circAKAP7-1235-001|ts:circAKAP7-3038-001"; tissue "ce|ts";
2	ncSplice	exon	404859937	404860079	.	+	.	gene_id "ENSMODG00000017586"; transcript_id "mdCircRNA-239"; exon_number "1" gene_name "AKAP7"; gene_biotype "protein_coding"; oId "ce:circAKAP7-1235-001|ts:circAKAP7-3038-001"; tissue "ce|ts";
2	ncSplice	exon	404875207	404875343	.	+	.	gene_id "ENSMODG00000017586"; transcript_id "mdCircRNA-239"; exon_number "2" gene_name "AKAP7"; gene_biotype "protein_coding"; oId "ce:circAKAP7-1235-001|ts:circAKAP7-3038-001"; tissue "ce|ts";
2	ncSplice	exon	404881225	404881385	.	+	.	gene_id "ENSMODG00000017586"; transcript_id "mdCircRNA-239"; exon_number "3" gene_name "AKAP7"; gene_biotype "protein_coding"; oId "ce:circAKAP7-1235-001|ts:circAKAP7-3038-001"; tissue "ce|ts";
2	ncSplice	exon	404899278	404899390	.	+	.	gene_id "ENSMODG00000017586"; transcript_id "mdCircRNA-239"; exon_number "4" gene_name "AKAP7"; gene_biotype "protein_coding"; oId "ce:circAKAP7-1235-001|ts:circAKAP7-3038-001"; tissue "ce|ts";
2	ncSplice	gene	412320102	412328865	.	-	.	gene_id "ENSMODG00000017436"; gene_name "MAP3K5"; gene_source "ncSplice"; gene_biotype "protein_coding";
2	ncSplice	transcript	412320102	412328865	.	-	.	gene_id "ENSMODG00000017436"; transcript_id "mdCircRNA-240"; gene_name "MAP3K5"; gene_biotype "protein_coding"; transcript_biotype "circRNA"; oId "ce:circMAP3K5-1241-001"; tissue "ce";
2	ncSplice	exon	412320102	412320272	.	-	.	gene_id "ENSMODG00000017436"; transcript_id "mdCircRNA-240"; exon_number "1" gene_name "MAP3K5"; gene_biotype "protein_coding"; oId "ce:circMAP3K5-1241-001"; tissue "ce";
2	ncSplice	exon	412324594	412324700	.	-	.	gene_id "ENSMODG00000017436"; transcript_id "mdCircRNA-240"; exon_number "2" gene_name "MAP3K5"; gene_biotype "protein_coding"; oId "ce:circMAP3K5-1241-001"; tissue "ce";
2	ncSplice	exon	412326428	412326596	.	-	.	gene_id "ENSMODG00000017436"; transcript_id "mdCircRNA-240"; exon_number "3" gene_name "MAP3K5"; gene_biotype "protein_coding"; oId "ce:circMAP3K5-1241-001"; tissue "ce";
2	ncSplice	exon	412328672	412328865	.	-	.	gene_id "ENSMODG00000017436"; transcript_id "mdCircRNA-240"; exon_number "4" gene_name "MAP3K5"; gene_biotype "protein_coding"; oId "ce:circMAP3K5-1241-001"; tissue "ce";
2	ncSplice	gene	433166069	433170027	.	-	.	gene_id "ENSMODG00000008487"; gene_name "MTRF1L"; gene_source "ncSplice"; gene_biotype "protein_coding";
2	ncSplice	transcript	433166069	433170027	.	-	.	gene_id "ENSMODG00000008487"; transcript_id "mdCircRNA-241"; gene_name "MTRF1L"; gene_biotype "protein_coding"; transcript_biotype "circRNA"; oId "ce:circMTRF1L-1273-001"; tissue "ce";
2	ncSplice	exon	433166069	433166186	.	-	.	gene_id "ENSMODG00000008487"; transcript_id "mdCircRNA-241"; exon_number "1" gene_name "MTRF1L"; gene_biotype "protein_coding"; oId "ce:circMTRF1L-1273-001"; tissue "ce";
2	ncSplice	exon	433167304	433167467	.	-	.	gene_id "ENSMODG00000008487"; transcript_id "mdCircRNA-241"; exon_number "2" gene_name "MTRF1L"; gene_biotype "protein_coding"; oId "ce:circMTRF1L-1273-001"; tissue "ce";
2	ncSplice	exon	433168065	433168248	.	-	.	gene_id "ENSMODG00000008487"; transcript_id "mdCircRNA-241"; exon_number "3" gene_name "MTRF1L"; gene_biotype "protein_coding"; oId "ce:circMTRF1L-1273-001"; tissue "ce";
2	ncSplice	exon	433169948	433170027	.	-	.	gene_id "ENSMODG00000008487"; transcript_id "mdCircRNA-241"; exon_number "4" gene_name "MTRF1L"; gene_biotype "protein_coding"; oId "ce:circMTRF1L-1273-001"; tissue "ce";
2	ncSplice	gene	459501844	459502313	.	+	.	gene_id "ENSMODG00000004497"; gene_name "ABCD3"; gene_source "ncSplice"; gene_biotype "protein_coding";
2	ncSplice	transcript	459501844	459502313	.	+	.	gene_id "ENSMODG00000004497"; transcript_id "mdCircRNA-242"; gene_name "ABCD3"; gene_biotype "protein_coding"; transcript_biotype "circRNA"; oId "ce:circABCD3-1298-001"; tissue "ce";
2	ncSplice	exon	459501844	459501921	.	+	.	gene_id "ENSMODG00000004497"; transcript_id "mdCircRNA-242"; exon_number "1" gene_name "ABCD3"; gene_biotype "protein_coding"; oId "ce:circABCD3-1298-001"; tissue "ce";
2	ncSplice	exon	459502011	459502076	.	+	.	gene_id "ENSMODG00000004497"; transcript_id "mdCircRNA-242"; exon_number "2" gene_name "ABCD3"; gene_biotype "protein_coding"; oId "ce:circABCD3-1298-001"; tissue "ce";
2	ncSplice	exon	459502224	459502313	.	+	.	gene_id "ENSMODG00000004497"; transcript_id "mdCircRNA-242"; exon_number "3" gene_name "ABCD3"; gene_biotype "protein_coding"; oId "ce:circABCD3-1298-001"; tissue "ce";
2	ncSplice	gene	499324206	499333096	.	-	.	gene_id "ENSMODG00000019128"; gene_name "AP2B1"; gene_source "ncSplice"; gene_biotype "protein_coding";
2	ncSplice	transcript	499324206	499333096	.	-	.	gene_id "ENSMODG00000019128"; transcript_id "mdCircRNA-243"; gene_name "AP2B1"; gene_biotype "protein_coding"; transcript_biotype "circRNA"; oId "ce:circAP2B1-1333-001|ts:circAP2B1-3333-001"; tissue "ce|ts";
2	ncSplice	exon	499324206	499324451	.	-	.	gene_id "ENSMODG00000019128"; transcript_id "mdCircRNA-243"; exon_number "1" gene_name "AP2B1"; gene_biotype "protein_coding"; oId "ce:circAP2B1-1333-001|ts:circAP2B1-3333-001"; tissue "ce|ts";
2	ncSplice	exon	499325705	499325840	.	-	.	gene_id "ENSMODG00000019128"; transcript_id "mdCircRNA-243"; exon_number "2" gene_name "AP2B1"; gene_biotype "protein_coding"; oId "ce:circAP2B1-1333-001|ts:circAP2B1-3333-001"; tissue "ce|ts";
2	ncSplice	exon	499330213	499330318	.	-	.	gene_id "ENSMODG00000019128"; transcript_id "mdCircRNA-243"; exon_number "3" gene_name "AP2B1"; gene_biotype "protein_coding"; oId "ce:circAP2B1-1333-001|ts:circAP2B1-3333-001"; tissue "ce|ts";
2	ncSplice	exon	499333037	499333096	.	-	.	gene_id "ENSMODG00000019128"; transcript_id "mdCircRNA-243"; exon_number "4" gene_name "AP2B1"; gene_biotype "protein_coding"; oId "ce:circAP2B1-1333-001|ts:circAP2B1-3333-001"; tissue "ce|ts";
2	ncSplice	gene	504358741	504359249	.	-	.	gene_id "ENSMODG00000019209"; gene_name "RAB11FIP4"; gene_source "ncSplice"; gene_biotype "protein_coding";
2	ncSplice	transcript	504358741	504359249	.	-	.	gene_id "ENSMODG00000019209"; transcript_id "mdCircRNA-244"; gene_name "RAB11FIP4"; gene_biotype "protein_coding"; transcript_biotype "circRNA"; oId "ce:circRAB11FIP4-1335-001"; tissue "ce";
2	ncSplice	exon	504358741	504358878	.	-	.	gene_id "ENSMODG00000019209"; transcript_id "mdCircRNA-244"; exon_number "1" gene_name "RAB11FIP4"; gene_biotype "protein_coding"; oId "ce:circRAB11FIP4-1335-001"; tissue "ce";
2	ncSplice	exon	504359168	504359249	.	-	.	gene_id "ENSMODG00000019209"; transcript_id "mdCircRNA-244"; exon_number "2" gene_name "RAB11FIP4"; gene_biotype "protein_coding"; oId "ce:circRAB11FIP4-1335-001"; tissue "ce";
2	ncSplice	gene	515271702	515285541	.	+	.	gene_id "ENSMODG00000009955"; gene_name "GOSR1"; gene_source "ncSplice"; gene_biotype "protein_coding";
2	ncSplice	transcript	515271702	515285541	.	+	.	gene_id "ENSMODG00000009955"; transcript_id "mdCircRNA-245"; gene_name "GOSR1"; gene_biotype "protein_coding"; transcript_biotype "circRNA"; oId "ce:circGOSR1-1346-001|ts:circGOSR1-3354-001"; tissue "ce|ts";
2	ncSplice	exon	515271702	515271789	.	+	.	gene_id "ENSMODG00000009955"; transcript_id "mdCircRNA-245"; exon_number "1" gene_name "GOSR1"; gene_biotype "protein_coding"; oId "ce:circGOSR1-1346-001|ts:circGOSR1-3354-001"; tissue "ce|ts";
2	ncSplice	exon	515272137	515272244	.	+	.	gene_id "ENSMODG00000009955"; transcript_id "mdCircRNA-245"; exon_number "2" gene_name "GOSR1"; gene_biotype "protein_coding"; oId "ce:circGOSR1-1346-001|ts:circGOSR1-3354-001"; tissue "ce|ts";
2	ncSplice	exon	515276265	515276356	.	+	.	gene_id "ENSMODG00000009955"; transcript_id "mdCircRNA-245"; exon_number "3" gene_name "GOSR1"; gene_biotype "protein_coding"; oId "ce:circGOSR1-1346-001|ts:circGOSR1-3354-001"; tissue "ce|ts";
2	ncSplice	exon	515285467	515285541	.	+	.	gene_id "ENSMODG00000009955"; transcript_id "mdCircRNA-245"; exon_number "4" gene_name "GOSR1"; gene_biotype "protein_coding"; oId "ce:circGOSR1-1346-001|ts:circGOSR1-3354-001"; tissue "ce|ts";
2	ncSplice	gene	525962406	525983562	.	+	.	gene_id "ENSMODG00000013433"; gene_name "KLHL24"; gene_source "ncSplice"; gene_biotype "protein_coding";
2	ncSplice	transcript	525962406	525983562	.	+	.	gene_id "ENSMODG00000013433"; transcript_id "mdCircRNA-246"; gene_name "KLHL24"; gene_biotype "protein_coding"; transcript_biotype "circRNA"; oId "ce:circKLHL24-1362-001"; tissue "ce";
2	ncSplice	exon	525962406	525963385	.	+	.	gene_id "ENSMODG00000013433"; transcript_id "mdCircRNA-246"; exon_number "1" gene_name "KLHL24"; gene_biotype "protein_coding"; oId "ce:circKLHL24-1362-001"; tissue "ce";
2	ncSplice	exon	525972983	525973167	.	+	.	gene_id "ENSMODG00000013433"; transcript_id "mdCircRNA-246"; exon_number "2" gene_name "KLHL24"; gene_biotype "protein_coding"; oId "ce:circKLHL24-1362-001"; tissue "ce";
2	ncSplice	exon	525977102	525977220	.	+	.	gene_id "ENSMODG00000013433"; transcript_id "mdCircRNA-246"; exon_number "3" gene_name "KLHL24"; gene_biotype "protein_coding"; oId "ce:circKLHL24-1362-001"; tissue "ce";
2	ncSplice	exon	525982222	525982410	.	+	.	gene_id "ENSMODG00000013433"; transcript_id "mdCircRNA-246"; exon_number "4" gene_name "KLHL24"; gene_biotype "protein_coding"; oId "ce:circKLHL24-1362-001"; tissue "ce";
2	ncSplice	exon	525983374	525983562	.	+	.	gene_id "ENSMODG00000013433"; transcript_id "mdCircRNA-246"; exon_number "5" gene_name "KLHL24"; gene_biotype "protein_coding"; oId "ce:circKLHL24-1362-001"; tissue "ce";
2	ncSplice	gene	64222732	64224419	.	+	.	gene_id "ENSMODG00000003962"; gene_name "DNM3"; gene_source "ncSplice"; gene_biotype "protein_coding";
2	ncSplice	transcript	64222732	64224419	.	+	.	gene_id "ENSMODG00000003962"; transcript_id "mdCircRNA-247"; gene_name "DNM3"; gene_biotype "protein_coding"; transcript_biotype "circRNA"; oId "ce:circDNM3-1376-001"; tissue "ce";
2	ncSplice	exon	64222732	64222881	.	+	.	gene_id "ENSMODG00000003962"; transcript_id "mdCircRNA-247"; exon_number "1" gene_name "DNM3"; gene_biotype "protein_coding"; oId "ce:circDNM3-1376-001"; tissue "ce";
2	ncSplice	exon	64224216	64224419	.	+	.	gene_id "ENSMODG00000003962"; transcript_id "mdCircRNA-247"; exon_number "2" gene_name "DNM3"; gene_biotype "protein_coding"; oId "ce:circDNM3-1376-001"; tissue "ce";
2	ncSplice	gene	80538697	80573935	.	+	.	gene_id "ENSMODG00000007472"; gene_name "SWT1"; gene_source "ncSplice"; gene_biotype "protein_coding";
2	ncSplice	transcript	80538697	80573935	.	+	.	gene_id "ENSMODG00000007472"; transcript_id "mdCircRNA-248"; gene_name "SWT1"; gene_biotype "protein_coding"; transcript_biotype "circRNA"; oId "ce:circSWT1-1399-001|ts:circSWT1-3528-001"; tissue "ce|ts";
2	ncSplice	exon	80538697	80538845	.	+	.	gene_id "ENSMODG00000007472"; transcript_id "mdCircRNA-248"; exon_number "1" gene_name "SWT1"; gene_biotype "protein_coding"; oId "ce:circSWT1-1399-001|ts:circSWT1-3528-001"; tissue "ce|ts";
2	ncSplice	exon	80541426	80541589	.	+	.	gene_id "ENSMODG00000007472"; transcript_id "mdCircRNA-248"; exon_number "2" gene_name "SWT1"; gene_biotype "protein_coding"; oId "ce:circSWT1-1399-001|ts:circSWT1-3528-001"; tissue "ce|ts";
2	ncSplice	exon	80548281	80548419	.	+	.	gene_id "ENSMODG00000007472"; transcript_id "mdCircRNA-248"; exon_number "3" gene_name "SWT1"; gene_biotype "protein_coding"; oId "ce:circSWT1-1399-001|ts:circSWT1-3528-001"; tissue "ce|ts";
2	ncSplice	exon	80555566	80555711	.	+	.	gene_id "ENSMODG00000007472"; transcript_id "mdCircRNA-248"; exon_number "4" gene_name "SWT1"; gene_biotype "protein_coding"; oId "ce:circSWT1-1399-001|ts:circSWT1-3528-001"; tissue "ce|ts";
2	ncSplice	exon	80561851	80562044	.	+	.	gene_id "ENSMODG00000007472"; transcript_id "mdCircRNA-248"; exon_number "5" gene_name "SWT1"; gene_biotype "protein_coding"; oId "ce:circSWT1-1399-001|ts:circSWT1-3528-001"; tissue "ce|ts";
2	ncSplice	exon	80573804	80573935	.	+	.	gene_id "ENSMODG00000007472"; transcript_id "mdCircRNA-248"; exon_number "6" gene_name "SWT1"; gene_biotype "protein_coding"; oId "ce:circSWT1-1399-001|ts:circSWT1-3528-001"; tissue "ce|ts";
3	ncSplice	gene	170405431	170425865	.	-	.	gene_id "ENSMODG00000007824"; gene_name "CSPP1"; gene_source "ncSplice"; gene_biotype "protein_coding";
3	ncSplice	transcript	170405431	170425865	.	-	.	gene_id "ENSMODG00000007824"; transcript_id "mdCircRNA-249"; gene_name "CSPP1"; gene_biotype "protein_coding"; transcript_biotype "circRNA"; oId "ce:circCSPP1-1451-001|ts:circCSPP1-3651-001"; tissue "ce|ts";
3	ncSplice	exon	170405431	170405633	.	-	.	gene_id "ENSMODG00000007824"; transcript_id "mdCircRNA-249"; exon_number "1" gene_name "CSPP1"; gene_biotype "protein_coding"; oId "ce:circCSPP1-1451-001|ts:circCSPP1-3651-001"; tissue "ce|ts";
3	ncSplice	exon	170407528	170407542	.	-	.	gene_id "ENSMODG00000007824"; transcript_id "mdCircRNA-249"; exon_number "2" gene_name "CSPP1"; gene_biotype "protein_coding"; oId "ce:circCSPP1-1451-001|ts:circCSPP1-3651-001"; tissue "ce|ts";
3	ncSplice	exon	170408190	170408247	.	-	.	gene_id "ENSMODG00000007824"; transcript_id "mdCircRNA-249"; exon_number "3" gene_name "CSPP1"; gene_biotype "protein_coding"; oId "ce:circCSPP1-1451-001|ts:circCSPP1-3651-001"; tissue "ce|ts";
3	ncSplice	exon	170414327	170414420	.	-	.	gene_id "ENSMODG00000007824"; transcript_id "mdCircRNA-249"; exon_number "4" gene_name "CSPP1"; gene_biotype "protein_coding"; oId "ce:circCSPP1-1451-001|ts:circCSPP1-3651-001"; tissue "ce|ts";
3	ncSplice	exon	170424059	170424144	.	-	.	gene_id "ENSMODG00000007824"; transcript_id "mdCircRNA-249"; exon_number "5" gene_name "CSPP1"; gene_biotype "protein_coding"; oId "ce:circCSPP1-1451-001|ts:circCSPP1-3651-001"; tissue "ce|ts";
3	ncSplice	exon	170425767	170425865	.	-	.	gene_id "ENSMODG00000007824"; transcript_id "mdCircRNA-249"; exon_number "6" gene_name "CSPP1"; gene_biotype "protein_coding"; oId "ce:circCSPP1-1451-001|ts:circCSPP1-3651-001"; tissue "ce|ts";
3	ncSplice	gene	170437080	170466054	.	-	.	gene_id "ENSMODG00000007824"; gene_name "CSPP1"; gene_source "ncSplice"; gene_biotype "protein_coding";
3	ncSplice	transcript	170437080	170466054	.	-	.	gene_id "ENSMODG00000007824"; transcript_id "mdCircRNA-250"; gene_name "CSPP1"; gene_biotype "protein_coding"; transcript_biotype "circRNA"; oId "ce:circCSPP1-1453-001|ts:circCSPP1-3654-001"; tissue "ce|ts";
3	ncSplice	exon	170437080	170437181	.	-	.	gene_id "ENSMODG00000007824"; transcript_id "mdCircRNA-250"; exon_number "1" gene_name "CSPP1"; gene_biotype "protein_coding"; oId "ce:circCSPP1-1453-001|ts:circCSPP1-3654-001"; tissue "ce|ts";
3	ncSplice	exon	170439396	170439476	.	-	.	gene_id "ENSMODG00000007824"; transcript_id "mdCircRNA-250"; exon_number "2" gene_name "CSPP1"; gene_biotype "protein_coding"; oId "ce:circCSPP1-1453-001|ts:circCSPP1-3654-001"; tissue "ce|ts";
3	ncSplice	exon	170455143	170455246	.	-	.	gene_id "ENSMODG00000007824"; transcript_id "mdCircRNA-250"; exon_number "3" gene_name "CSPP1"; gene_biotype "protein_coding"; oId "ce:circCSPP1-1453-001|ts:circCSPP1-3654-001"; tissue "ce|ts";
3	ncSplice	exon	170464626	170464725	.	-	.	gene_id "ENSMODG00000007824"; transcript_id "mdCircRNA-250"; exon_number "4" gene_name "CSPP1"; gene_biotype "protein_coding"; oId "ce:circCSPP1-1453-001|ts:circCSPP1-3654-001"; tissue "ce|ts";
3	ncSplice	exon	170465946	170466054	.	-	.	gene_id "ENSMODG00000007824"; transcript_id "mdCircRNA-250"; exon_number "5" gene_name "CSPP1"; gene_biotype "protein_coding"; oId "ce:circCSPP1-1453-001|ts:circCSPP1-3654-001"; tissue "ce|ts";
3	ncSplice	gene	188067134	188068599	.	+	.	gene_id "ENSMODG00000027911"; gene_name "NA"; gene_source "ncSplice"; gene_biotype "protein_coding";
3	ncSplice	transcript	188067134	188068599	.	+	.	gene_id "ENSMODG00000027911"; transcript_id "mdCircRNA-251"; gene_name "NA"; gene_biotype "protein_coding"; transcript_biotype "circRNA"; oId "ce:circNA-1470-001"; tissue "ce";
3	ncSplice	exon	188067134	188067257	.	+	.	gene_id "ENSMODG00000027911"; transcript_id "mdCircRNA-251"; exon_number "1" gene_name "NA"; gene_biotype "protein_coding"; oId "ce:circNA-1470-001"; tissue "ce";
3	ncSplice	exon	188068470	188068599	.	+	.	gene_id "ENSMODG00000027911"; transcript_id "mdCircRNA-251"; exon_number "2" gene_name "NA"; gene_biotype "protein_coding"; oId "ce:circNA-1470-001"; tissue "ce";
3	ncSplice	gene	200559607	200585841	.	+	.	gene_id "ENSMODG00000010919"; gene_name "B4GALT6"; gene_source "ncSplice"; gene_biotype "protein_coding";
3	ncSplice	transcript	200559607	200585841	.	+	.	gene_id "ENSMODG00000010919"; transcript_id "mdCircRNA-252"; gene_name "B4GALT6"; gene_biotype "protein_coding"; transcript_biotype "circRNA"; oId "ce:circB4GALT6-1485-001"; tissue "ce";
3	ncSplice	exon	200559607	200559723	.	+	.	gene_id "ENSMODG00000010919"; transcript_id "mdCircRNA-252"; exon_number "1" gene_name "B4GALT6"; gene_biotype "protein_coding"; oId "ce:circB4GALT6-1485-001"; tissue "ce";
3	ncSplice	exon	200585728	200585841	.	+	.	gene_id "ENSMODG00000010919"; transcript_id "mdCircRNA-252"; exon_number "2" gene_name "B4GALT6"; gene_biotype "protein_coding"; oId "ce:circB4GALT6-1485-001"; tissue "ce";
3	ncSplice	gene	200559607	200601157	.	+	.	gene_id "ENSMODG00000010919"; gene_name "B4GALT6"; gene_source "ncSplice"; gene_biotype "protein_coding";
3	ncSplice	transcript	200559607	200601157	.	+	.	gene_id "ENSMODG00000010919"; transcript_id "mdCircRNA-253"; gene_name "B4GALT6"; gene_biotype "protein_coding"; transcript_biotype "circRNA"; oId "ce:circB4GALT6-1486-001"; tissue "ce";
3	ncSplice	exon	200559607	200559723	.	+	.	gene_id "ENSMODG00000010919"; transcript_id "mdCircRNA-253"; exon_number "1" gene_name "B4GALT6"; gene_biotype "protein_coding"; oId "ce:circB4GALT6-1486-001"; tissue "ce";
3	ncSplice	exon	200585728	200585841	.	+	.	gene_id "ENSMODG00000010919"; transcript_id "mdCircRNA-253"; exon_number "2" gene_name "B4GALT6"; gene_biotype "protein_coding"; oId "ce:circB4GALT6-1486-001"; tissue "ce";
3	ncSplice	exon	200598004	200598128	.	+	.	gene_id "ENSMODG00000010919"; transcript_id "mdCircRNA-253"; exon_number "3" gene_name "B4GALT6"; gene_biotype "protein_coding"; oId "ce:circB4GALT6-1486-001"; tissue "ce";
3	ncSplice	exon	200601041	200601157	.	+	.	gene_id "ENSMODG00000010919"; transcript_id "mdCircRNA-253"; exon_number "4" gene_name "B4GALT6"; gene_biotype "protein_coding"; oId "ce:circB4GALT6-1486-001"; tissue "ce";
3	ncSplice	gene	200559607	200608192	.	+	.	gene_id "ENSMODG00000010919"; gene_name "B4GALT6"; gene_source "ncSplice"; gene_biotype "protein_coding";
3	ncSplice	transcript	200559607	200608192	.	+	.	gene_id "ENSMODG00000010919"; transcript_id "mdCircRNA-254"; gene_name "B4GALT6"; gene_biotype "protein_coding"; transcript_biotype "circRNA"; oId "ce:circB4GALT6-1487-001"; tissue "ce";
3	ncSplice	exon	200559607	200559723	.	+	.	gene_id "ENSMODG00000010919"; transcript_id "mdCircRNA-254"; exon_number "1" gene_name "B4GALT6"; gene_biotype "protein_coding"; oId "ce:circB4GALT6-1487-001"; tissue "ce";
3	ncSplice	exon	200585728	200585841	.	+	.	gene_id "ENSMODG00000010919"; transcript_id "mdCircRNA-254"; exon_number "2" gene_name "B4GALT6"; gene_biotype "protein_coding"; oId "ce:circB4GALT6-1487-001"; tissue "ce";
3	ncSplice	exon	200598004	200598128	.	+	.	gene_id "ENSMODG00000010919"; transcript_id "mdCircRNA-254"; exon_number "3" gene_name "B4GALT6"; gene_biotype "protein_coding"; oId "ce:circB4GALT6-1487-001"; tissue "ce";
3	ncSplice	exon	200601041	200601157	.	+	.	gene_id "ENSMODG00000010919"; transcript_id "mdCircRNA-254"; exon_number "4" gene_name "B4GALT6"; gene_biotype "protein_coding"; oId "ce:circB4GALT6-1487-001"; tissue "ce";
3	ncSplice	exon	200608005	200608192	.	+	.	gene_id "ENSMODG00000010919"; transcript_id "mdCircRNA-254"; exon_number "5" gene_name "B4GALT6"; gene_biotype "protein_coding"; oId "ce:circB4GALT6-1487-001"; tissue "ce";
3	ncSplice	gene	238846905	238852207	.	+	.	gene_id "ENSMODG00000020345"; gene_name "NA"; gene_source "ncSplice"; gene_biotype "protein_coding";
3	ncSplice	transcript	238846905	238852207	.	+	.	gene_id "ENSMODG00000020345"; transcript_id "mdCircRNA-255"; gene_name "NA"; gene_biotype "protein_coding"; transcript_biotype "circRNA"; oId "ce:circNA-1504-001|ts:circNA-3790-001"; tissue "ce|ts";
3	ncSplice	exon	238846905	238847056	.	+	.	gene_id "ENSMODG00000020345"; transcript_id "mdCircRNA-255"; exon_number "1" gene_name "NA"; gene_biotype "protein_coding"; oId "ce:circNA-1504-001|ts:circNA-3790-001"; tissue "ce|ts";
3	ncSplice	exon	238849856	238849985	.	+	.	gene_id "ENSMODG00000020345"; transcript_id "mdCircRNA-255"; exon_number "2" gene_name "NA"; gene_biotype "protein_coding"; oId "ce:circNA-1504-001|ts:circNA-3790-001"; tissue "ce|ts";
3	ncSplice	exon	238850947	238851001	.	+	.	gene_id "ENSMODG00000020345"; transcript_id "mdCircRNA-255"; exon_number "3" gene_name "NA"; gene_biotype "protein_coding"; oId "ce:circNA-1504-001|ts:circNA-3790-001"; tissue "ce|ts";
3	ncSplice	exon	238852103	238852207	.	+	.	gene_id "ENSMODG00000020345"; transcript_id "mdCircRNA-255"; exon_number "4" gene_name "NA"; gene_biotype "protein_coding"; oId "ce:circNA-1504-001|ts:circNA-3790-001"; tissue "ce|ts";
3	ncSplice	gene	238881524	238885439	.	+	.	gene_id "ENSMODG00000020348"; gene_name "NA"; gene_source "ncSplice"; gene_biotype "protein_coding";
3	ncSplice	transcript	238881524	238885439	.	+	.	gene_id "ENSMODG00000020348"; transcript_id "mdCircRNA-256"; gene_name "NA"; gene_biotype "protein_coding"; transcript_biotype "circRNA"; oId "ce:circNA-1505-001"; tissue "ce";
3	ncSplice	exon	238881524	238881582	.	+	.	gene_id "ENSMODG00000020348"; transcript_id "mdCircRNA-256"; exon_number "1" gene_name "NA"; gene_biotype "protein_coding"; oId "ce:circNA-1505-001"; tissue "ce";
3	ncSplice	exon	238882460	238882630	.	+	.	gene_id "ENSMODG00000020348"; transcript_id "mdCircRNA-256"; exon_number "2" gene_name "NA"; gene_biotype "protein_coding"; oId "ce:circNA-1505-001"; tissue "ce";
3	ncSplice	exon	238884816	238885439	.	+	.	gene_id "ENSMODG00000020348"; transcript_id "mdCircRNA-256"; exon_number "3" gene_name "NA"; gene_biotype "protein_coding"; oId "ce:circNA-1505-001"; tissue "ce";
3	ncSplice	gene	246136530	246150022	.	+	.	gene_id "ENSMODG00000020424"; gene_name "LMAN1"; gene_source "ncSplice"; gene_biotype "protein_coding";
3	ncSplice	transcript	246136530	246150022	.	+	.	gene_id "ENSMODG00000020424"; transcript_id "mdCircRNA-257"; gene_name "LMAN1"; gene_biotype "protein_coding"; transcript_biotype "circRNA"; oId "ce:circLMAN1-1518-001|ts:circLMAN1-3810-001"; tissue "ce|ts";
3	ncSplice	exon	246136530	246136684	.	+	.	gene_id "ENSMODG00000020424"; transcript_id "mdCircRNA-257"; exon_number "1" gene_name "LMAN1"; gene_biotype "protein_coding"; oId "ce:circLMAN1-1518-001|ts:circLMAN1-3810-001"; tissue "ce|ts";
3	ncSplice	exon	246136766	246136873	.	+	.	gene_id "ENSMODG00000020424"; transcript_id "mdCircRNA-257"; exon_number "2" gene_name "LMAN1"; gene_biotype "protein_coding"; oId "ce:circLMAN1-1518-001|ts:circLMAN1-3810-001"; tissue "ce|ts";
3	ncSplice	exon	246146074	246146135	.	+	.	gene_id "ENSMODG00000020424"; transcript_id "mdCircRNA-257"; exon_number "3" gene_name "LMAN1"; gene_biotype "protein_coding"; oId "ce:circLMAN1-1518-001|ts:circLMAN1-3810-001"; tissue "ce|ts";
3	ncSplice	exon	246149923	246150022	.	+	.	gene_id "ENSMODG00000020424"; transcript_id "mdCircRNA-257"; exon_number "4" gene_name "LMAN1"; gene_biotype "protein_coding"; oId "ce:circLMAN1-1518-001|ts:circLMAN1-3810-001"; tissue "ce|ts";
3	ncSplice	gene	246721401	246725274	.	-	.	gene_id "ENSMODG00000020433"; gene_name "ZNF532"; gene_source "ncSplice"; gene_biotype "protein_coding";
3	ncSplice	transcript	246721401	246725274	.	-	.	gene_id "ENSMODG00000020433"; transcript_id "mdCircRNA-258"; gene_name "ZNF532"; gene_biotype "protein_coding"; transcript_biotype "circRNA"; oId "ce:circZNF532-1519-001|ts:circZNF532-3812-001"; tissue "ce|ts";
3	ncSplice	exon	246721401	246721682	.	-	.	gene_id "ENSMODG00000020433"; transcript_id "mdCircRNA-258"; exon_number "1" gene_name "ZNF532"; gene_biotype "protein_coding"; oId "ce:circZNF532-1519-001|ts:circZNF532-3812-001"; tissue "ce|ts";
3	ncSplice	exon	246725112	246725274	.	-	.	gene_id "ENSMODG00000020433"; transcript_id "mdCircRNA-258"; exon_number "2" gene_name "ZNF532"; gene_biotype "protein_coding"; oId "ce:circZNF532-1519-001|ts:circZNF532-3812-001"; tissue "ce|ts";
3	ncSplice	gene	258795225	258801054	.	+	.	gene_id "ENSMODG00000021509"; gene_name "ZNF521"; gene_source "ncSplice"; gene_biotype "protein_coding";
3	ncSplice	transcript	258795225	258801054	.	+	.	gene_id "ENSMODG00000021509"; transcript_id "mdCircRNA-259"; gene_name "ZNF521"; gene_biotype "protein_coding"; transcript_biotype "circRNA"; oId "ce:circZNF521-1534-001"; tissue "ce";
3	ncSplice	exon	258795225	258795284	.	+	.	gene_id "ENSMODG00000021509"; transcript_id "mdCircRNA-259"; exon_number "1" gene_name "ZNF521"; gene_biotype "protein_coding"; oId "ce:circZNF521-1534-001"; tissue "ce";
3	ncSplice	exon	258800875	258801054	.	+	.	gene_id "ENSMODG00000021509"; transcript_id "mdCircRNA-259"; exon_number "2" gene_name "ZNF521"; gene_biotype "protein_coding"; oId "ce:circZNF521-1534-001"; tissue "ce";
3	ncSplice	gene	26877603	26916910	.	+	.	gene_id "ENSMODG00000019612"; gene_name "IPO11"; gene_source "ncSplice"; gene_biotype "protein_coding";
3	ncSplice	transcript	26877603	26916910	.	+	.	gene_id "ENSMODG00000019612"; transcript_id "mdCircRNA-260"; gene_name "IPO11"; gene_biotype "protein_coding"; transcript_biotype "circRNA"; oId "ce:circIPO11-1551-001|ts:circIPO11-3922-001"; tissue "ce|ts";
3	ncSplice	exon	26877603	26877698	.	+	.	gene_id "ENSMODG00000019612"; transcript_id "mdCircRNA-260"; exon_number "1" gene_name "IPO11"; gene_biotype "protein_coding"; oId "ce:circIPO11-1551-001|ts:circIPO11-3922-001"; tissue "ce|ts";
3	ncSplice	exon	26882710	26882823	.	+	.	gene_id "ENSMODG00000019612"; transcript_id "mdCircRNA-260"; exon_number "2" gene_name "IPO11"; gene_biotype "protein_coding"; oId "ce:circIPO11-1551-001|ts:circIPO11-3922-001"; tissue "ce|ts";
3	ncSplice	exon	26889107	26889228	.	+	.	gene_id "ENSMODG00000019612"; transcript_id "mdCircRNA-260"; exon_number "3" gene_name "IPO11"; gene_biotype "protein_coding"; oId "ce:circIPO11-1551-001|ts:circIPO11-3922-001"; tissue "ce|ts";
3	ncSplice	exon	26909342	26909437	.	+	.	gene_id "ENSMODG00000019612"; transcript_id "mdCircRNA-260"; exon_number "4" gene_name "IPO11"; gene_biotype "protein_coding"; oId "ce:circIPO11-1551-001|ts:circIPO11-3922-001"; tissue "ce|ts";
3	ncSplice	exon	26916826	26916910	.	+	.	gene_id "ENSMODG00000019612"; transcript_id "mdCircRNA-260"; exon_number "5" gene_name "IPO11"; gene_biotype "protein_coding"; oId "ce:circIPO11-1551-001|ts:circIPO11-3922-001"; tissue "ce|ts";
3	ncSplice	gene	269218182	269236425	.	-	.	gene_id "ENSMODG00000021461"; gene_name "DLGAP1"; gene_source "ncSplice"; gene_biotype "protein_coding";
3	ncSplice	transcript	269218182	269236425	.	-	.	gene_id "ENSMODG00000021461"; transcript_id "mdCircRNA-261"; gene_name "DLGAP1"; gene_biotype "protein_coding"; transcript_biotype "circRNA"; oId "ce:circDLGAP1-1553-001"; tissue "ce";
3	ncSplice	exon	269218182	269218273	.	-	.	gene_id "ENSMODG00000021461"; transcript_id "mdCircRNA-261"; exon_number "1" gene_name "DLGAP1"; gene_biotype "protein_coding"; oId "ce:circDLGAP1-1553-001"; tissue "ce";
3	ncSplice	exon	269236049	269236425	.	-	.	gene_id "ENSMODG00000021461"; transcript_id "mdCircRNA-261"; exon_number "2" gene_name "DLGAP1"; gene_biotype "protein_coding"; oId "ce:circDLGAP1-1553-001"; tissue "ce";
3	ncSplice	gene	271523511	271538126	.	-	.	gene_id "ENSMODG00000021459"; gene_name "EPB41L3"; gene_source "ncSplice"; gene_biotype "protein_coding";
3	ncSplice	transcript	271523511	271538126	.	-	.	gene_id "ENSMODG00000021459"; transcript_id "mdCircRNA-262"; gene_name "EPB41L3"; gene_biotype "protein_coding"; transcript_biotype "circRNA"; oId "ce:circEPB41L3-1556-001"; tissue "ce";
3	ncSplice	exon	271523511	271523708	.	-	.	gene_id "ENSMODG00000021459"; transcript_id "mdCircRNA-262"; exon_number "1" gene_name "EPB41L3"; gene_biotype "protein_coding"; oId "ce:circEPB41L3-1556-001"; tissue "ce";
3	ncSplice	exon	271537924	271538126	.	-	.	gene_id "ENSMODG00000021459"; transcript_id "mdCircRNA-262"; exon_number "2" gene_name "EPB41L3"; gene_biotype "protein_coding"; oId "ce:circEPB41L3-1556-001"; tissue "ce";
3	ncSplice	gene	275735708	275740174	.	+	.	gene_id "ENSMODG00000021451"; gene_name "MTCL1"; gene_source "ncSplice"; gene_biotype "protein_coding";
3	ncSplice	transcript	275735708	275740174	.	+	.	gene_id "ENSMODG00000021451"; transcript_id "mdCircRNA-263"; gene_name "MTCL1"; gene_biotype "protein_coding"; transcript_biotype "circRNA"; oId "ce:circMTCL1-1560-001|ts:circMTCL1-3932-001"; tissue "ce|ts";
3	ncSplice	exon	275735708	275735932	.	+	.	gene_id "ENSMODG00000021451"; transcript_id "mdCircRNA-263"; exon_number "1" gene_name "MTCL1"; gene_biotype "protein_coding"; oId "ce:circMTCL1-1560-001|ts:circMTCL1-3932-001"; tissue "ce|ts";
3	ncSplice	exon	275740016	275740174	.	+	.	gene_id "ENSMODG00000021451"; transcript_id "mdCircRNA-263"; exon_number "2" gene_name "MTCL1"; gene_biotype "protein_coding"; oId "ce:circMTCL1-1560-001|ts:circMTCL1-3932-001"; tissue "ce|ts";
3	ncSplice	gene	281145789	281149617	.	+	.	gene_id "ENSMODG00000021421"; gene_name "SEH1L"; gene_source "ncSplice"; gene_biotype "protein_coding";
3	ncSplice	transcript	281145789	281149617	.	+	.	gene_id "ENSMODG00000021421"; transcript_id "mdCircRNA-264"; gene_name "SEH1L"; gene_biotype "protein_coding"; transcript_biotype "circRNA"; oId "ce:circSEH1L-1576-001"; tissue "ce";
3	ncSplice	exon	281145789	281146000	.	+	.	gene_id "ENSMODG00000021421"; transcript_id "mdCircRNA-264"; exon_number "1" gene_name "SEH1L"; gene_biotype "protein_coding"; oId "ce:circSEH1L-1576-001"; tissue "ce";
3	ncSplice	exon	281148110	281148208	.	+	.	gene_id "ENSMODG00000021421"; transcript_id "mdCircRNA-264"; exon_number "2" gene_name "SEH1L"; gene_biotype "protein_coding"; oId "ce:circSEH1L-1576-001"; tissue "ce";
3	ncSplice	exon	281148864	281149004	.	+	.	gene_id "ENSMODG00000021421"; transcript_id "mdCircRNA-264"; exon_number "3" gene_name "SEH1L"; gene_biotype "protein_coding"; oId "ce:circSEH1L-1576-001"; tissue "ce";
3	ncSplice	exon	281149460	281149617	.	+	.	gene_id "ENSMODG00000021421"; transcript_id "mdCircRNA-264"; exon_number "4" gene_name "SEH1L"; gene_biotype "protein_coding"; oId "ce:circSEH1L-1576-001"; tissue "ce";
3	ncSplice	gene	305991590	306031442	.	+	.	gene_id "ENSMODG00000012304"; gene_name "ZNF236"; gene_source "ncSplice"; gene_biotype "protein_coding";
3	ncSplice	transcript	305991590	306031442	.	+	.	gene_id "ENSMODG00000012304"; transcript_id "mdCircRNA-265"; gene_name "ZNF236"; gene_biotype "protein_coding"; transcript_biotype "circRNA"; oId "ce:circZNF236-1586-001|ts:circZNF236-3988-001"; tissue "ce|ts";
3	ncSplice	exon	305991590	305991732	.	+	.	gene_id "ENSMODG00000012304"; transcript_id "mdCircRNA-265"; exon_number "1" gene_name "ZNF236"; gene_biotype "protein_coding"; oId "ce:circZNF236-1586-001|ts:circZNF236-3988-001"; tissue "ce|ts";
3	ncSplice	exon	305993018	305993182	.	+	.	gene_id "ENSMODG00000012304"; transcript_id "mdCircRNA-265"; exon_number "2" gene_name "ZNF236"; gene_biotype "protein_coding"; oId "ce:circZNF236-1586-001|ts:circZNF236-3988-001"; tissue "ce|ts";
3	ncSplice	exon	306023218	306023396	.	+	.	gene_id "ENSMODG00000012304"; transcript_id "mdCircRNA-265"; exon_number "3" gene_name "ZNF236"; gene_biotype "protein_coding"; oId "ce:circZNF236-1586-001|ts:circZNF236-3988-001"; tissue "ce|ts";
3	ncSplice	exon	306031318	306031442	.	+	.	gene_id "ENSMODG00000012304"; transcript_id "mdCircRNA-265"; exon_number "4" gene_name "ZNF236"; gene_biotype "protein_coding"; oId "ce:circZNF236-1586-001|ts:circZNF236-3988-001"; tissue "ce|ts";
3	ncSplice	gene	305991590	306043598	.	+	.	gene_id "ENSMODG00000012304"; gene_name "ZNF236"; gene_source "ncSplice"; gene_biotype "protein_coding";
3	ncSplice	transcript	305991590	306043598	.	+	.	gene_id "ENSMODG00000012304"; transcript_id "mdCircRNA-266"; gene_name "ZNF236"; gene_biotype "protein_coding"; transcript_biotype "circRNA"; oId "ce:circZNF236-1587-001|ts:circZNF236-3989-001"; tissue "ce|ts";
3	ncSplice	exon	305991590	305991732	.	+	.	gene_id "ENSMODG00000012304"; transcript_id "mdCircRNA-266"; exon_number "1" gene_name "ZNF236"; gene_biotype "protein_coding"; oId "ce:circZNF236-1587-001|ts:circZNF236-3989-001"; tissue "ce|ts";
3	ncSplice	exon	305993018	305993182	.	+	.	gene_id "ENSMODG00000012304"; transcript_id "mdCircRNA-266"; exon_number "2" gene_name "ZNF236"; gene_biotype "protein_coding"; oId "ce:circZNF236-1587-001|ts:circZNF236-3989-001"; tissue "ce|ts";
3	ncSplice	exon	306023218	306023396	.	+	.	gene_id "ENSMODG00000012304"; transcript_id "mdCircRNA-266"; exon_number "3" gene_name "ZNF236"; gene_biotype "protein_coding"; oId "ce:circZNF236-1587-001|ts:circZNF236-3989-001"; tissue "ce|ts";
3	ncSplice	exon	306031318	306031442	.	+	.	gene_id "ENSMODG00000012304"; transcript_id "mdCircRNA-266"; exon_number "4" gene_name "ZNF236"; gene_biotype "protein_coding"; oId "ce:circZNF236-1587-001|ts:circZNF236-3989-001"; tissue "ce|ts";
3	ncSplice	exon	306043426	306043598	.	+	.	gene_id "ENSMODG00000012304"; transcript_id "mdCircRNA-266"; exon_number "5" gene_name "ZNF236"; gene_biotype "protein_coding"; oId "ce:circZNF236-1587-001|ts:circZNF236-3989-001"; tissue "ce|ts";
3	ncSplice	gene	311057101	311106262	.	+	.	gene_id "ENSMODG00000011995"; gene_name "CTDP1"; gene_source "ncSplice"; gene_biotype "protein_coding";
3	ncSplice	transcript	311057101	311106262	.	+	.	gene_id "ENSMODG00000011995"; transcript_id "mdCircRNA-267"; gene_name "CTDP1"; gene_biotype "protein_coding"; transcript_biotype "circRNA"; oId "ce:circCTDP1-1601-001|ts:circCTDP1-4017-001"; tissue "ce|ts";
3	ncSplice	exon	311057101	311057242	.	+	.	gene_id "ENSMODG00000011995"; transcript_id "mdCircRNA-267"; exon_number "1" gene_name "CTDP1"; gene_biotype "protein_coding"; oId "ce:circCTDP1-1601-001|ts:circCTDP1-4017-001"; tissue "ce|ts";
3	ncSplice	exon	311059181	311059411	.	+	.	gene_id "ENSMODG00000011995"; transcript_id "mdCircRNA-267"; exon_number "2" gene_name "CTDP1"; gene_biotype "protein_coding"; oId "ce:circCTDP1-1601-001|ts:circCTDP1-4017-001"; tissue "ce|ts";
3	ncSplice	exon	311078017	311078182	.	+	.	gene_id "ENSMODG00000011995"; transcript_id "mdCircRNA-267"; exon_number "3" gene_name "CTDP1"; gene_biotype "protein_coding"; oId "ce:circCTDP1-1601-001|ts:circCTDP1-4017-001"; tissue "ce|ts";
3	ncSplice	exon	311106093	311106262	.	+	.	gene_id "ENSMODG00000011995"; transcript_id "mdCircRNA-267"; exon_number "4" gene_name "CTDP1"; gene_biotype "protein_coding"; oId "ce:circCTDP1-1601-001|ts:circCTDP1-4017-001"; tissue "ce|ts";
3	ncSplice	gene	311078017	311106262	.	+	.	gene_id "ENSMODG00000011995"; gene_name "CTDP1"; gene_source "ncSplice"; gene_biotype "protein_coding";
3	ncSplice	transcript	311078017	311106262	.	+	.	gene_id "ENSMODG00000011995"; transcript_id "mdCircRNA-268"; gene_name "CTDP1"; gene_biotype "protein_coding"; transcript_biotype "circRNA"; oId "ce:circCTDP1-1602-001|ts:circCTDP1-4018-001"; tissue "ce|ts";
3	ncSplice	exon	311078017	311078182	.	+	.	gene_id "ENSMODG00000011995"; transcript_id "mdCircRNA-268"; exon_number "1" gene_name "CTDP1"; gene_biotype "protein_coding"; oId "ce:circCTDP1-1602-001|ts:circCTDP1-4018-001"; tissue "ce|ts";
3	ncSplice	exon	311106093	311106262	.	+	.	gene_id "ENSMODG00000011995"; transcript_id "mdCircRNA-268"; exon_number "2" gene_name "CTDP1"; gene_biotype "protein_coding"; oId "ce:circCTDP1-1602-001|ts:circCTDP1-4018-001"; tissue "ce|ts";
3	ncSplice	gene	327698961	327707182	.	+	.	gene_id "ENSMODG00000010656"; gene_name "RANBP9"; gene_source "ncSplice"; gene_biotype "protein_coding";
3	ncSplice	transcript	327698961	327707182	.	+	.	gene_id "ENSMODG00000010656"; transcript_id "mdCircRNA-269"; gene_name "RANBP9"; gene_biotype "protein_coding"; transcript_biotype "circRNA"; oId "ce:circRANBP9-1626-001"; tissue "ce";
3	ncSplice	exon	327698961	327699888	.	+	.	gene_id "ENSMODG00000010656"; transcript_id "mdCircRNA-269"; exon_number "1" gene_name "RANBP9"; gene_biotype "protein_coding"; oId "ce:circRANBP9-1626-001"; tissue "ce";
3	ncSplice	exon	327701124	327701232	.	+	.	gene_id "ENSMODG00000010656"; transcript_id "mdCircRNA-269"; exon_number "2" gene_name "RANBP9"; gene_biotype "protein_coding"; oId "ce:circRANBP9-1626-001"; tissue "ce";
3	ncSplice	exon	327701963	327702153	.	+	.	gene_id "ENSMODG00000010656"; transcript_id "mdCircRNA-269"; exon_number "3" gene_name "RANBP9"; gene_biotype "protein_coding"; oId "ce:circRANBP9-1626-001"; tissue "ce";
3	ncSplice	exon	327703601	327703745	.	+	.	gene_id "ENSMODG00000010656"; transcript_id "mdCircRNA-269"; exon_number "4" gene_name "RANBP9"; gene_biotype "protein_coding"; oId "ce:circRANBP9-1626-001"; tissue "ce";
3	ncSplice	exon	327705203	327705324	.	+	.	gene_id "ENSMODG00000010656"; transcript_id "mdCircRNA-269"; exon_number "5" gene_name "RANBP9"; gene_biotype "protein_coding"; oId "ce:circRANBP9-1626-001"; tissue "ce";
3	ncSplice	exon	327707031	327707182	.	+	.	gene_id "ENSMODG00000010656"; transcript_id "mdCircRNA-269"; exon_number "6" gene_name "RANBP9"; gene_biotype "protein_coding"; oId "ce:circRANBP9-1626-001"; tissue "ce";
3	ncSplice	gene	337151576	337153757	.	+	.	gene_id "ENSMODG00000009939"; gene_name "CAGE1"; gene_source "ncSplice"; gene_biotype "protein_coding";
3	ncSplice	transcript	337151576	337153757	.	+	.	gene_id "ENSMODG00000009939"; transcript_id "mdCircRNA-270"; gene_name "CAGE1"; gene_biotype "protein_coding"; transcript_biotype "circRNA"; oId "ce:circCAGE1-1628-001"; tissue "ce";
3	ncSplice	exon	337151576	337151793	.	+	.	gene_id "ENSMODG00000009939"; transcript_id "mdCircRNA-270"; exon_number "1" gene_name "CAGE1"; gene_biotype "protein_coding"; oId "ce:circCAGE1-1628-001"; tissue "ce";
3	ncSplice	exon	337153673	337153757	.	+	.	gene_id "ENSMODG00000009939"; transcript_id "mdCircRNA-270"; exon_number "2" gene_name "CAGE1"; gene_biotype "protein_coding"; oId "ce:circCAGE1-1628-001"; tissue "ce";
3	ncSplice	gene	340570622	340641873	.	-	.	gene_id "ENSMODG00000009804"; gene_name "NA"; gene_source "ncSplice"; gene_biotype "protein_coding";
3	ncSplice	transcript	340570622	340641873	.	-	.	gene_id "ENSMODG00000009804"; transcript_id "mdCircRNA-271"; gene_name "NA"; gene_biotype "protein_coding"; transcript_biotype "circRNA"; oId "ce:circNA-1631-001|ts:circNA-4073-001"; tissue "ce|ts";
3	ncSplice	exon	340570622	340571288	.	-	.	gene_id "ENSMODG00000009804"; transcript_id "mdCircRNA-271"; exon_number "1" gene_name "NA"; gene_biotype "protein_coding"; oId "ce:circNA-1631-001|ts:circNA-4073-001"; tissue "ce|ts";
3	ncSplice	exon	340571663	340641873	.	-	.	gene_id "ENSMODG00000009804"; transcript_id "mdCircRNA-271"; exon_number "2" gene_name "NA"; gene_biotype "protein_coding"; oId "ce:circNA-1631-001|ts:circNA-4073-001"; tissue "ce|ts";
3	ncSplice	gene	353411250	353441230	.	-	.	gene_id "ENSMODG00000007561"; gene_name "TMEM55A"; gene_source "ncSplice"; gene_biotype "protein_coding";
3	ncSplice	transcript	353411250	353441230	.	-	.	gene_id "ENSMODG00000007561"; transcript_id "mdCircRNA-272"; gene_name "TMEM55A"; gene_biotype "protein_coding"; transcript_biotype "circRNA"; oId "ce:circTMEM55A-1640-001"; tissue "ce";
3	ncSplice	exon	353411250	353411302	.	-	.	gene_id "ENSMODG00000007561"; transcript_id "mdCircRNA-272"; exon_number "1" gene_name "TMEM55A"; gene_biotype "protein_coding"; oId "ce:circTMEM55A-1640-001"; tissue "ce";
3	ncSplice	exon	353435921	353436044	.	-	.	gene_id "ENSMODG00000007561"; transcript_id "mdCircRNA-272"; exon_number "2" gene_name "TMEM55A"; gene_biotype "protein_coding"; oId "ce:circTMEM55A-1640-001"; tissue "ce";
3	ncSplice	exon	353437490	353437596	.	-	.	gene_id "ENSMODG00000007561"; transcript_id "mdCircRNA-272"; exon_number "3" gene_name "TMEM55A"; gene_biotype "protein_coding"; oId "ce:circTMEM55A-1640-001"; tissue "ce";
3	ncSplice	exon	353441082	353441230	.	-	.	gene_id "ENSMODG00000007561"; transcript_id "mdCircRNA-272"; exon_number "4" gene_name "TMEM55A"; gene_biotype "protein_coding"; oId "ce:circTMEM55A-1640-001"; tissue "ce";
3	ncSplice	gene	353435921	353441230	.	-	.	gene_id "ENSMODG00000007561"; gene_name "TMEM55A"; gene_source "ncSplice"; gene_biotype "protein_coding";
3	ncSplice	transcript	353435921	353441230	.	-	.	gene_id "ENSMODG00000007561"; transcript_id "mdCircRNA-273"; gene_name "TMEM55A"; gene_biotype "protein_coding"; transcript_biotype "circRNA"; oId "ce:circTMEM55A-1641-001"; tissue "ce";
3	ncSplice	exon	353435921	353436044	.	-	.	gene_id "ENSMODG00000007561"; transcript_id "mdCircRNA-273"; exon_number "1" gene_name "TMEM55A"; gene_biotype "protein_coding"; oId "ce:circTMEM55A-1641-001"; tissue "ce";
3	ncSplice	exon	353437490	353437596	.	-	.	gene_id "ENSMODG00000007561"; transcript_id "mdCircRNA-273"; exon_number "2" gene_name "TMEM55A"; gene_biotype "protein_coding"; oId "ce:circTMEM55A-1641-001"; tissue "ce";
3	ncSplice	exon	353441082	353441230	.	-	.	gene_id "ENSMODG00000007561"; transcript_id "mdCircRNA-273"; exon_number "3" gene_name "TMEM55A"; gene_biotype "protein_coding"; oId "ce:circTMEM55A-1641-001"; tissue "ce";
3	ncSplice	gene	36394775	36425304	.	-	.	gene_id "ENSMODG00000019716"; gene_name "PAPD4"; gene_source "ncSplice"; gene_biotype "protein_coding";
3	ncSplice	transcript	36394775	36425304	.	-	.	gene_id "ENSMODG00000019716"; transcript_id "mdCircRNA-274"; gene_name "PAPD4"; gene_biotype "protein_coding"; transcript_biotype "circRNA"; oId "ce:circPAPD4-1655-001|ts:circPAPD4-4135-002"; tissue "ce|ts";
3	ncSplice	exon	36394775	36394903	.	-	.	gene_id "ENSMODG00000019716"; transcript_id "mdCircRNA-274"; exon_number "1" gene_name "PAPD4"; gene_biotype "protein_coding"; oId "ce:circPAPD4-1655-001|ts:circPAPD4-4135-002"; tissue "ce|ts";
3	ncSplice	exon	36395343	36395419	.	-	.	gene_id "ENSMODG00000019716"; transcript_id "mdCircRNA-274"; exon_number "2" gene_name "PAPD4"; gene_biotype "protein_coding"; oId "ce:circPAPD4-1655-001|ts:circPAPD4-4135-002"; tissue "ce|ts";
3	ncSplice	exon	36399738	36399807	.	-	.	gene_id "ENSMODG00000019716"; transcript_id "mdCircRNA-274"; exon_number "3" gene_name "PAPD4"; gene_biotype "protein_coding"; oId "ce:circPAPD4-1655-001|ts:circPAPD4-4135-002"; tissue "ce|ts";
3	ncSplice	exon	36407797	36407863	.	-	.	gene_id "ENSMODG00000019716"; transcript_id "mdCircRNA-274"; exon_number "4" gene_name "PAPD4"; gene_biotype "protein_coding"; oId "ce:circPAPD4-1655-001|ts:circPAPD4-4135-002"; tissue "ce|ts";
3	ncSplice	exon	36410505	36410596	.	-	.	gene_id "ENSMODG00000019716"; transcript_id "mdCircRNA-274"; exon_number "5" gene_name "PAPD4"; gene_biotype "protein_coding"; oId "ce:circPAPD4-1655-001|ts:circPAPD4-4135-002"; tissue "ce|ts";
3	ncSplice	exon	36410705	36410819	.	-	.	gene_id "ENSMODG00000019716"; transcript_id "mdCircRNA-274"; exon_number "6" gene_name "PAPD4"; gene_biotype "protein_coding"; oId "ce:circPAPD4-1655-001|ts:circPAPD4-4135-002"; tissue "ce|ts";
3	ncSplice	exon	36421649	36421901	.	-	.	gene_id "ENSMODG00000019716"; transcript_id "mdCircRNA-274"; exon_number "7" gene_name "PAPD4"; gene_biotype "protein_coding"; oId "ce:circPAPD4-1655-001|ts:circPAPD4-4135-002"; tissue "ce|ts";
3	ncSplice	exon	36424147	36424266	.	-	.	gene_id "ENSMODG00000019716"; transcript_id "mdCircRNA-274"; exon_number "8" gene_name "PAPD4"; gene_biotype "protein_coding"; oId "ce:circPAPD4-1655-001|ts:circPAPD4-4135-002"; tissue "ce|ts";
3	ncSplice	exon	36425119	36425304	.	-	.	gene_id "ENSMODG00000019716"; transcript_id "mdCircRNA-274"; exon_number "9" gene_name "PAPD4"; gene_biotype "protein_coding"; oId "ce:circPAPD4-1655-001|ts:circPAPD4-4135-002"; tissue "ce|ts";
3	ncSplice	gene	364094599	364165205	.	+	.	gene_id "ENSMODG00000006415"; gene_name "VPS13B"; gene_source "ncSplice"; gene_biotype "protein_coding";
3	ncSplice	transcript	364094599	364165205	.	+	.	gene_id "ENSMODG00000006415"; transcript_id "mdCircRNA-275"; gene_name "VPS13B"; gene_biotype "protein_coding"; transcript_biotype "circRNA"; oId "ce:circVPS13B-1657-001|ts:circVPS13B-4139-001"; tissue "ce|ts";
3	ncSplice	exon	364094599	364094693	.	+	.	gene_id "ENSMODG00000006415"; transcript_id "mdCircRNA-275"; exon_number "1" gene_name "VPS13B"; gene_biotype "protein_coding"; oId "ce:circVPS13B-1657-001|ts:circVPS13B-4139-001"; tissue "ce|ts";
3	ncSplice	exon	364122360	364122544	.	+	.	gene_id "ENSMODG00000006415"; transcript_id "mdCircRNA-275"; exon_number "2" gene_name "VPS13B"; gene_biotype "protein_coding"; oId "ce:circVPS13B-1657-001|ts:circVPS13B-4139-001"; tissue "ce|ts";
3	ncSplice	exon	364126063	364126232	.	+	.	gene_id "ENSMODG00000006415"; transcript_id "mdCircRNA-275"; exon_number "3" gene_name "VPS13B"; gene_biotype "protein_coding"; oId "ce:circVPS13B-1657-001|ts:circVPS13B-4139-001"; tissue "ce|ts";
3	ncSplice	exon	364128154	364128348	.	+	.	gene_id "ENSMODG00000006415"; transcript_id "mdCircRNA-275"; exon_number "4" gene_name "VPS13B"; gene_biotype "protein_coding"; oId "ce:circVPS13B-1657-001|ts:circVPS13B-4139-001"; tissue "ce|ts";
3	ncSplice	exon	364140343	364140467	.	+	.	gene_id "ENSMODG00000006415"; transcript_id "mdCircRNA-275"; exon_number "5" gene_name "VPS13B"; gene_biotype "protein_coding"; oId "ce:circVPS13B-1657-001|ts:circVPS13B-4139-001"; tissue "ce|ts";
3	ncSplice	exon	364165024	364165205	.	+	.	gene_id "ENSMODG00000006415"; transcript_id "mdCircRNA-275"; exon_number "6" gene_name "VPS13B"; gene_biotype "protein_coding"; oId "ce:circVPS13B-1657-001|ts:circVPS13B-4139-001"; tissue "ce|ts";
3	ncSplice	gene	364122353	364165205	.	+	.	gene_id "ENSMODG00000006415"; gene_name "VPS13B"; gene_source "ncSplice"; gene_biotype "protein_coding";
3	ncSplice	transcript	364122353	364165205	.	+	.	gene_id "ENSMODG00000006415"; transcript_id "mdCircRNA-276"; gene_name "VPS13B"; gene_biotype "protein_coding"; transcript_biotype "circRNA"; oId "ce:circVPS13B-1660-001"; tissue "ce";
3	ncSplice	exon	364122353	364122544	.	+	.	gene_id "ENSMODG00000006415"; transcript_id "mdCircRNA-276"; exon_number "1" gene_name "VPS13B"; gene_biotype "protein_coding"; oId "ce:circVPS13B-1660-001"; tissue "ce";
3	ncSplice	exon	364126063	364126232	.	+	.	gene_id "ENSMODG00000006415"; transcript_id "mdCircRNA-276"; exon_number "2" gene_name "VPS13B"; gene_biotype "protein_coding"; oId "ce:circVPS13B-1660-001"; tissue "ce";
3	ncSplice	exon	364128154	364128348	.	+	.	gene_id "ENSMODG00000006415"; transcript_id "mdCircRNA-276"; exon_number "3" gene_name "VPS13B"; gene_biotype "protein_coding"; oId "ce:circVPS13B-1660-001"; tissue "ce";
3	ncSplice	exon	364140343	364140467	.	+	.	gene_id "ENSMODG00000006415"; transcript_id "mdCircRNA-276"; exon_number "4" gene_name "VPS13B"; gene_biotype "protein_coding"; oId "ce:circVPS13B-1660-001"; tissue "ce";
3	ncSplice	exon	364165024	364165205	.	+	.	gene_id "ENSMODG00000006415"; transcript_id "mdCircRNA-276"; exon_number "5" gene_name "VPS13B"; gene_biotype "protein_coding"; oId "ce:circVPS13B-1660-001"; tissue "ce";
3	ncSplice	gene	364259752	364261104	.	+	.	gene_id "ENSMODG00000006415"; gene_name "VPS13B"; gene_source "ncSplice"; gene_biotype "protein_coding";
3	ncSplice	transcript	364259752	364261104	.	+	.	gene_id "ENSMODG00000006415"; transcript_id "mdCircRNA-277"; gene_name "VPS13B"; gene_biotype "protein_coding"; transcript_biotype "circRNA"; oId "ce:circVPS13B-1663-001|ts:circVPS13B-4142-001"; tissue "ce|ts";
3	ncSplice	exon	364259752	364259886	.	+	.	gene_id "ENSMODG00000006415"; transcript_id "mdCircRNA-277"; exon_number "1" gene_name "VPS13B"; gene_biotype "protein_coding"; oId "ce:circVPS13B-1663-001|ts:circVPS13B-4142-001"; tissue "ce|ts";
3	ncSplice	exon	364260931	364261104	.	+	.	gene_id "ENSMODG00000006415"; transcript_id "mdCircRNA-277"; exon_number "2" gene_name "VPS13B"; gene_biotype "protein_coding"; oId "ce:circVPS13B-1663-001|ts:circVPS13B-4142-001"; tissue "ce|ts";
3	ncSplice	gene	370649656	370668350	.	+	.	gene_id "ENSMODG00000005498"; gene_name "RIMS2"; gene_source "ncSplice"; gene_biotype "protein_coding";
3	ncSplice	transcript	370649656	370668350	.	+	.	gene_id "ENSMODG00000005498"; transcript_id "mdCircRNA-278"; gene_name "RIMS2"; gene_biotype "protein_coding"; transcript_biotype "circRNA"; oId "ce:circRIMS2-1675-001"; tissue "ce";
3	ncSplice	exon	370649656	370649724	.	+	.	gene_id "ENSMODG00000005498"; transcript_id "mdCircRNA-278"; exon_number "1" gene_name "RIMS2"; gene_biotype "protein_coding"; oId "ce:circRIMS2-1675-001"; tissue "ce";
3	ncSplice	exon	370659402	370659558	.	+	.	gene_id "ENSMODG00000005498"; transcript_id "mdCircRNA-278"; exon_number "2" gene_name "RIMS2"; gene_biotype "protein_coding"; oId "ce:circRIMS2-1675-001"; tissue "ce";
3	ncSplice	exon	370668234	370668350	.	+	.	gene_id "ENSMODG00000005498"; transcript_id "mdCircRNA-278"; exon_number "3" gene_name "RIMS2"; gene_biotype "protein_coding"; oId "ce:circRIMS2-1675-001"; tissue "ce";
3	ncSplice	gene	370732337	370804557	.	+	.	gene_id "ENSMODG00000005498"; gene_name "RIMS2"; gene_source "ncSplice"; gene_biotype "protein_coding";
3	ncSplice	transcript	370732337	370804557	.	+	.	gene_id "ENSMODG00000005498"; transcript_id "mdCircRNA-279"; gene_name "RIMS2"; gene_biotype "protein_coding"; transcript_biotype "circRNA"; oId "ce:circRIMS2-1678-002"; tissue "ce";
3	ncSplice	exon	370732337	370743988	.	+	.	gene_id "ENSMODG00000005498"; transcript_id "mdCircRNA-279"; exon_number "1" gene_name "RIMS2"; gene_biotype "protein_coding"; oId "ce:circRIMS2-1678-002"; tissue "ce";
3	ncSplice	exon	370772772	370772872	.	+	.	gene_id "ENSMODG00000005498"; transcript_id "mdCircRNA-279"; exon_number "2" gene_name "RIMS2"; gene_biotype "protein_coding"; oId "ce:circRIMS2-1678-002"; tissue "ce";
3	ncSplice	exon	370804385	370804557	.	+	.	gene_id "ENSMODG00000005498"; transcript_id "mdCircRNA-279"; exon_number "3" gene_name "RIMS2"; gene_biotype "protein_coding"; oId "ce:circRIMS2-1678-002"; tissue "ce";
3	ncSplice	gene	370743959	370804557	.	+	.	gene_id "ENSMODG00000005498"; gene_name "RIMS2"; gene_source "ncSplice"; gene_biotype "protein_coding";
3	ncSplice	transcript	370743959	370804557	.	+	.	gene_id "ENSMODG00000005498"; transcript_id "mdCircRNA-280"; gene_name "RIMS2"; gene_biotype "protein_coding"; transcript_biotype "circRNA"; oId "ce:circRIMS2-1681-002"; tissue "ce";
3	ncSplice	exon	370743959	370743988	.	+	.	gene_id "ENSMODG00000005498"; transcript_id "mdCircRNA-280"; exon_number "1" gene_name "RIMS2"; gene_biotype "protein_coding"; oId "ce:circRIMS2-1681-002"; tissue "ce";
3	ncSplice	exon	370772772	370772872	.	+	.	gene_id "ENSMODG00000005498"; transcript_id "mdCircRNA-280"; exon_number "2" gene_name "RIMS2"; gene_biotype "protein_coding"; oId "ce:circRIMS2-1681-002"; tissue "ce";
3	ncSplice	exon	370804385	370804557	.	+	.	gene_id "ENSMODG00000005498"; transcript_id "mdCircRNA-280"; exon_number "3" gene_name "RIMS2"; gene_biotype "protein_coding"; oId "ce:circRIMS2-1681-002"; tissue "ce";
3	ncSplice	gene	370772772	370804557	.	+	.	gene_id "ENSMODG00000005498"; gene_name "RIMS2"; gene_source "ncSplice"; gene_biotype "protein_coding";
3	ncSplice	transcript	370772772	370804557	.	+	.	gene_id "ENSMODG00000005498"; transcript_id "mdCircRNA-281"; gene_name "RIMS2"; gene_biotype "protein_coding"; transcript_biotype "circRNA"; oId "ce:circRIMS2-1683-001|ts:circRIMS2-4178-001"; tissue "ce|ts";
3	ncSplice	exon	370772772	370772872	.	+	.	gene_id "ENSMODG00000005498"; transcript_id "mdCircRNA-281"; exon_number "1" gene_name "RIMS2"; gene_biotype "protein_coding"; oId "ce:circRIMS2-1683-001|ts:circRIMS2-4178-001"; tissue "ce|ts";
3	ncSplice	exon	370804385	370804557	.	+	.	gene_id "ENSMODG00000005498"; transcript_id "mdCircRNA-281"; exon_number "2" gene_name "RIMS2"; gene_biotype "protein_coding"; oId "ce:circRIMS2-1683-001|ts:circRIMS2-4178-001"; tissue "ce|ts";
3	ncSplice	gene	374160383	374162650	.	+	.	gene_id "ENSMODG00000005343"; gene_name "OXR1"; gene_source "ncSplice"; gene_biotype "protein_coding";
3	ncSplice	transcript	374160383	374162650	.	+	.	gene_id "ENSMODG00000005343"; transcript_id "mdCircRNA-282"; gene_name "OXR1"; gene_biotype "protein_coding"; transcript_biotype "circRNA"; oId "ce:circOXR1-1692-001"; tissue "ce";
3	ncSplice	exon	374160383	374160529	.	+	.	gene_id "ENSMODG00000005343"; transcript_id "mdCircRNA-282"; exon_number "1" gene_name "OXR1"; gene_biotype "protein_coding"; oId "ce:circOXR1-1692-001"; tissue "ce";
3	ncSplice	exon	374162466	374162650	.	+	.	gene_id "ENSMODG00000005343"; transcript_id "mdCircRNA-282"; exon_number "2" gene_name "OXR1"; gene_biotype "protein_coding"; oId "ce:circOXR1-1692-001"; tissue "ce";
3	ncSplice	gene	376187689	376199904	.	+	.	gene_id "ENSMODG00000004954"; gene_name "EMC2"; gene_source "ncSplice"; gene_biotype "protein_coding";
3	ncSplice	transcript	376187689	376199904	.	+	.	gene_id "ENSMODG00000004954"; transcript_id "mdCircRNA-283"; gene_name "EMC2"; gene_biotype "protein_coding"; transcript_biotype "circRNA"; oId "ce:circEMC2-1695-001"; tissue "ce";
3	ncSplice	exon	376187689	376193826	.	+	.	gene_id "ENSMODG00000004954"; transcript_id "mdCircRNA-283"; exon_number "1" gene_name "EMC2"; gene_biotype "protein_coding"; oId "ce:circEMC2-1695-001"; tissue "ce";
3	ncSplice	exon	376198092	376199904	.	+	.	gene_id "ENSMODG00000004954"; transcript_id "mdCircRNA-283"; exon_number "2" gene_name "EMC2"; gene_biotype "protein_coding"; oId "ce:circEMC2-1695-001"; tissue "ce";
3	ncSplice	gene	407345024	407377729	.	-	.	gene_id "ENSMODG00000001522"; gene_name "ASAP1"; gene_source "ncSplice"; gene_biotype "protein_coding";
3	ncSplice	transcript	407345024	407377729	.	-	.	gene_id "ENSMODG00000001522"; transcript_id "mdCircRNA-284"; gene_name "ASAP1"; gene_biotype "protein_coding"; transcript_biotype "circRNA"; oId "ce:circASAP1-1715-001|ts:circASAP1-4257-001"; tissue "ce|ts";
3	ncSplice	exon	407345024	407345093	.	-	.	gene_id "ENSMODG00000001522"; transcript_id "mdCircRNA-284"; exon_number "1" gene_name "ASAP1"; gene_biotype "protein_coding"; oId "ce:circASAP1-1715-001|ts:circASAP1-4257-001"; tissue "ce|ts";
3	ncSplice	exon	407351552	407351652	.	-	.	gene_id "ENSMODG00000001522"; transcript_id "mdCircRNA-284"; exon_number "2" gene_name "ASAP1"; gene_biotype "protein_coding"; oId "ce:circASAP1-1715-001|ts:circASAP1-4257-001"; tissue "ce|ts";
3	ncSplice	exon	407364396	407364482	.	-	.	gene_id "ENSMODG00000001522"; transcript_id "mdCircRNA-284"; exon_number "3" gene_name "ASAP1"; gene_biotype "protein_coding"; oId "ce:circASAP1-1715-001|ts:circASAP1-4257-001"; tissue "ce|ts";
3	ncSplice	exon	407366004	407366079	.	-	.	gene_id "ENSMODG00000001522"; transcript_id "mdCircRNA-284"; exon_number "4" gene_name "ASAP1"; gene_biotype "protein_coding"; oId "ce:circASAP1-1715-001|ts:circASAP1-4257-001"; tissue "ce|ts";
3	ncSplice	exon	407376253	407376338	.	-	.	gene_id "ENSMODG00000001522"; transcript_id "mdCircRNA-284"; exon_number "5" gene_name "ASAP1"; gene_biotype "protein_coding"; oId "ce:circASAP1-1715-001|ts:circASAP1-4257-001"; tissue "ce|ts";
3	ncSplice	exon	407377600	407377729	.	-	.	gene_id "ENSMODG00000001522"; transcript_id "mdCircRNA-284"; exon_number "6" gene_name "ASAP1"; gene_biotype "protein_coding"; oId "ce:circASAP1-1715-001|ts:circASAP1-4257-001"; tissue "ce|ts";
3	ncSplice	gene	423040688	423089321	.	-	.	gene_id "ENSMODG00000024422"; gene_name "NA"; gene_source "ncSplice"; gene_biotype "protein_coding";
3	ncSplice	transcript	423040688	423089321	.	-	.	gene_id "ENSMODG00000024422"; transcript_id "mdCircRNA-285"; gene_name "NA"; gene_biotype "protein_coding"; transcript_biotype "circRNA"; oId "ce:circNA-1732-001|ts:circNA-4297-001"; tissue "ce|ts";
3	ncSplice	exon	423040688	423040831	.	-	.	gene_id "ENSMODG00000024422"; transcript_id "mdCircRNA-285"; exon_number "1" gene_name "NA"; gene_biotype "protein_coding"; oId "ce:circNA-1732-001|ts:circNA-4297-001"; tissue "ce|ts";
3	ncSplice	exon	423062022	423062238	.	-	.	gene_id "ENSMODG00000024422"; transcript_id "mdCircRNA-285"; exon_number "2" gene_name "NA"; gene_biotype "protein_coding"; oId "ce:circNA-1732-001|ts:circNA-4297-001"; tissue "ce|ts";
3	ncSplice	exon	423086390	423086515	.	-	.	gene_id "ENSMODG00000024422"; transcript_id "mdCircRNA-285"; exon_number "3" gene_name "NA"; gene_biotype "protein_coding"; oId "ce:circNA-1732-001|ts:circNA-4297-001"; tissue "ce|ts";
3	ncSplice	exon	423089200	423089321	.	-	.	gene_id "ENSMODG00000024422"; transcript_id "mdCircRNA-285"; exon_number "4" gene_name "NA"; gene_biotype "protein_coding"; oId "ce:circNA-1732-001|ts:circNA-4297-001"; tissue "ce|ts";
3	ncSplice	gene	448534813	448537198	.	+	.	gene_id "ENSMODG00000006823"; gene_name "PIP5K1C"; gene_source "ncSplice"; gene_biotype "protein_coding";
3	ncSplice	transcript	448534813	448537198	.	+	.	gene_id "ENSMODG00000006823"; transcript_id "mdCircRNA-286"; gene_name "PIP5K1C"; gene_biotype "protein_coding"; transcript_biotype "circRNA"; oId "ce:circPIP5K1C-1772-001"; tissue "ce";
3	ncSplice	exon	448534813	448535152	.	+	.	gene_id "ENSMODG00000006823"; transcript_id "mdCircRNA-286"; exon_number "1" gene_name "PIP5K1C"; gene_biotype "protein_coding"; oId "ce:circPIP5K1C-1772-001"; tissue "ce";
3	ncSplice	exon	448537118	448537198	.	+	.	gene_id "ENSMODG00000006823"; transcript_id "mdCircRNA-286"; exon_number "2" gene_name "PIP5K1C"; gene_biotype "protein_coding"; oId "ce:circPIP5K1C-1772-001"; tissue "ce";
3	ncSplice	gene	449994972	449996079	.	+	.	gene_id "ENSMODG00000007201"; gene_name "NA"; gene_source "ncSplice"; gene_biotype "protein_coding";
3	ncSplice	transcript	449994972	449996079	.	+	.	gene_id "ENSMODG00000007201"; transcript_id "mdCircRNA-287"; gene_name "NA"; gene_biotype "protein_coding"; transcript_biotype "circRNA"; oId "ce:circNA-1773-001"; tissue "ce";
3	ncSplice	exon	449994972	449995043	.	+	.	gene_id "ENSMODG00000007201"; transcript_id "mdCircRNA-287"; exon_number "1" gene_name "NA"; gene_biotype "protein_coding"; oId "ce:circNA-1773-001"; tissue "ce";
3	ncSplice	exon	449995641	449995710	.	+	.	gene_id "ENSMODG00000007201"; transcript_id "mdCircRNA-287"; exon_number "2" gene_name "NA"; gene_biotype "protein_coding"; oId "ce:circNA-1773-001"; tissue "ce";
3	ncSplice	exon	449995920	449996079	.	+	.	gene_id "ENSMODG00000007201"; transcript_id "mdCircRNA-287"; exon_number "3" gene_name "NA"; gene_biotype "protein_coding"; oId "ce:circNA-1773-001"; tissue "ce";
3	ncSplice	gene	47211987	47235647	.	+	.	gene_id "ENSMODG00000001742"; gene_name "FCHO2"; gene_source "ncSplice"; gene_biotype "protein_coding";
3	ncSplice	transcript	47211987	47235647	.	+	.	gene_id "ENSMODG00000001742"; transcript_id "mdCircRNA-288"; gene_name "FCHO2"; gene_biotype "protein_coding"; transcript_biotype "circRNA"; oId "ce:circFCHO2-1797-001"; tissue "ce";
3	ncSplice	exon	47211987	47212060	.	+	.	gene_id "ENSMODG00000001742"; transcript_id "mdCircRNA-288"; exon_number "1" gene_name "FCHO2"; gene_biotype "protein_coding"; oId "ce:circFCHO2-1797-001"; tissue "ce";
3	ncSplice	exon	47215595	47218878	.	+	.	gene_id "ENSMODG00000001742"; transcript_id "mdCircRNA-288"; exon_number "2" gene_name "FCHO2"; gene_biotype "protein_coding"; oId "ce:circFCHO2-1797-001"; tissue "ce";
3	ncSplice	exon	47235544	47235647	.	+	.	gene_id "ENSMODG00000001742"; transcript_id "mdCircRNA-288"; exon_number "3" gene_name "FCHO2"; gene_biotype "protein_coding"; oId "ce:circFCHO2-1797-001"; tissue "ce";
3	ncSplice	gene	485927595	485930467	.	-	.	gene_id "ENSMODG00000012253"; gene_name "CLIP1"; gene_source "ncSplice"; gene_biotype "protein_coding";
3	ncSplice	transcript	485927595	485930467	.	-	.	gene_id "ENSMODG00000012253"; transcript_id "mdCircRNA-289"; gene_name "CLIP1"; gene_biotype "protein_coding"; transcript_biotype "circRNA"; oId "ce:circCLIP1-1820-001"; tissue "ce";
3	ncSplice	exon	485927595	485928166	.	-	.	gene_id "ENSMODG00000012253"; transcript_id "mdCircRNA-289"; exon_number "1" gene_name "CLIP1"; gene_biotype "protein_coding"; oId "ce:circCLIP1-1820-001"; tissue "ce";
3	ncSplice	exon	485930275	485930467	.	-	.	gene_id "ENSMODG00000012253"; transcript_id "mdCircRNA-289"; exon_number "2" gene_name "CLIP1"; gene_biotype "protein_coding"; oId "ce:circCLIP1-1820-001"; tissue "ce";
3	ncSplice	gene	50625017	50625956	.	-	.	gene_id "ENSMODG00000002107"; gene_name "COL4A3BP"; gene_source "ncSplice"; gene_biotype "protein_coding";
3	ncSplice	transcript	50625017	50625956	.	-	.	gene_id "ENSMODG00000002107"; transcript_id "mdCircRNA-290"; gene_name "COL4A3BP"; gene_biotype "protein_coding"; transcript_biotype "circRNA"; oId "ce:circCOL4A3BP-1846-001|ts:circCOL4A3BP-4621-001"; tissue "ce|ts";
3	ncSplice	exon	50625017	50625146	.	-	.	gene_id "ENSMODG00000002107"; transcript_id "mdCircRNA-290"; exon_number "1" gene_name "COL4A3BP"; gene_biotype "protein_coding"; oId "ce:circCOL4A3BP-1846-001|ts:circCOL4A3BP-4621-001"; tissue "ce|ts";
3	ncSplice	exon	50625828	50625956	.	-	.	gene_id "ENSMODG00000002107"; transcript_id "mdCircRNA-290"; exon_number "2" gene_name "COL4A3BP"; gene_biotype "protein_coding"; oId "ce:circCOL4A3BP-1846-001|ts:circCOL4A3BP-4621-001"; tissue "ce|ts";
3	ncSplice	gene	506794464	506801994	.	+	.	gene_id "ENSMODG00000015309"; gene_name "SUDS3"; gene_source "ncSplice"; gene_biotype "protein_coding";
3	ncSplice	transcript	506794464	506801994	.	+	.	gene_id "ENSMODG00000015309"; transcript_id "mdCircRNA-291"; gene_name "SUDS3"; gene_biotype "protein_coding"; transcript_biotype "circRNA"; oId "ce:circSUDS3-1850-001|ts:circSUDS3-4630-001"; tissue "ce|ts";
3	ncSplice	exon	506794464	506794519	.	+	.	gene_id "ENSMODG00000015309"; transcript_id "mdCircRNA-291"; exon_number "1" gene_name "SUDS3"; gene_biotype "protein_coding"; oId "ce:circSUDS3-1850-001|ts:circSUDS3-4630-001"; tissue "ce|ts";
3	ncSplice	exon	506796117	506796188	.	+	.	gene_id "ENSMODG00000015309"; transcript_id "mdCircRNA-291"; exon_number "2" gene_name "SUDS3"; gene_biotype "protein_coding"; oId "ce:circSUDS3-1850-001|ts:circSUDS3-4630-001"; tissue "ce|ts";
3	ncSplice	exon	506800314	506800333	.	+	.	gene_id "ENSMODG00000015309"; transcript_id "mdCircRNA-291"; exon_number "3" gene_name "SUDS3"; gene_biotype "protein_coding"; oId "ce:circSUDS3-1850-001|ts:circSUDS3-4630-001"; tissue "ce|ts";
3	ncSplice	exon	506801838	506801994	.	+	.	gene_id "ENSMODG00000015309"; transcript_id "mdCircRNA-291"; exon_number "4" gene_name "SUDS3"; gene_biotype "protein_coding"; oId "ce:circSUDS3-1850-001|ts:circSUDS3-4630-001"; tissue "ce|ts";
3	ncSplice	gene	516497569	516504087	.	-	.	gene_id "ENSMODG00000025640"; gene_name "NA"; gene_source "ncSplice"; gene_biotype "protein_coding";
3	ncSplice	transcript	516497569	516504087	.	-	.	gene_id "ENSMODG00000025640"; transcript_id "mdCircRNA-292"; gene_name "NA"; gene_biotype "protein_coding"; transcript_biotype "circRNA"; oId "ce:circNA-1862-001"; tissue "ce";
3	ncSplice	exon	516497569	516497707	.	-	.	gene_id "ENSMODG00000025640"; transcript_id "mdCircRNA-292"; exon_number "1" gene_name "NA"; gene_biotype "protein_coding"; oId "ce:circNA-1862-001"; tissue "ce";
3	ncSplice	exon	516499037	516499122	.	-	.	gene_id "ENSMODG00000025640"; transcript_id "mdCircRNA-292"; exon_number "2" gene_name "NA"; gene_biotype "protein_coding"; oId "ce:circNA-1862-001"; tissue "ce";
3	ncSplice	exon	516503526	516503648	.	-	.	gene_id "ENSMODG00000025640"; transcript_id "mdCircRNA-292"; exon_number "3" gene_name "NA"; gene_biotype "protein_coding"; oId "ce:circNA-1862-001"; tissue "ce";
3	ncSplice	exon	516503977	516504087	.	-	.	gene_id "ENSMODG00000025640"; transcript_id "mdCircRNA-292"; exon_number "4" gene_name "NA"; gene_biotype "protein_coding"; oId "ce:circNA-1862-001"; tissue "ce";
4	ncSplice	gene	149480630	149486354	.	-	.	gene_id "ENSMODG00000003327"; gene_name "ORC4"; gene_source "ncSplice"; gene_biotype "protein_coding";
4	ncSplice	transcript	149480630	149486354	.	-	.	gene_id "ENSMODG00000003327"; transcript_id "mdCircRNA-293"; gene_name "ORC4"; gene_biotype "protein_coding"; transcript_biotype "circRNA"; oId "ce:circORC4-1967-001|ts:circORC4-4882-001"; tissue "ce|ts";
4	ncSplice	exon	149480630	149480716	.	-	.	gene_id "ENSMODG00000003327"; transcript_id "mdCircRNA-293"; exon_number "1" gene_name "ORC4"; gene_biotype "protein_coding"; oId "ce:circORC4-1967-001|ts:circORC4-4882-001"; tissue "ce|ts";
4	ncSplice	exon	149483788	149483961	.	-	.	gene_id "ENSMODG00000003327"; transcript_id "mdCircRNA-293"; exon_number "2" gene_name "ORC4"; gene_biotype "protein_coding"; oId "ce:circORC4-1967-001|ts:circORC4-4882-001"; tissue "ce|ts";
4	ncSplice	exon	149486203	149486354	.	-	.	gene_id "ENSMODG00000003327"; transcript_id "mdCircRNA-293"; exon_number "3" gene_name "ORC4"; gene_biotype "protein_coding"; oId "ce:circORC4-1967-001|ts:circORC4-4882-001"; tissue "ce|ts";
4	ncSplice	gene	149524456	149533405	.	-	.	gene_id "ENSMODG00000003327"; gene_name "ORC4"; gene_source "ncSplice"; gene_biotype "protein_coding";
4	ncSplice	transcript	149524456	149533405	.	-	.	gene_id "ENSMODG00000003327"; transcript_id "mdCircRNA-294"; gene_name "ORC4"; gene_biotype "protein_coding"; transcript_biotype "circRNA"; oId "ce:circORC4-1969-001|ts:circORC4-4887-001"; tissue "ce|ts";
4	ncSplice	exon	149524456	149524546	.	-	.	gene_id "ENSMODG00000003327"; transcript_id "mdCircRNA-294"; exon_number "1" gene_name "ORC4"; gene_biotype "protein_coding"; oId "ce:circORC4-1969-001|ts:circORC4-4887-001"; tissue "ce|ts";
4	ncSplice	exon	149524765	149524841	.	-	.	gene_id "ENSMODG00000003327"; transcript_id "mdCircRNA-294"; exon_number "2" gene_name "ORC4"; gene_biotype "protein_coding"; oId "ce:circORC4-1969-001|ts:circORC4-4887-001"; tissue "ce|ts";
4	ncSplice	exon	149533332	149533405	.	-	.	gene_id "ENSMODG00000003327"; transcript_id "mdCircRNA-294"; exon_number "3" gene_name "ORC4"; gene_biotype "protein_coding"; oId "ce:circORC4-1969-001|ts:circORC4-4887-001"; tissue "ce|ts";
4	ncSplice	gene	154246947	154249910	.	-	.	gene_id "ENSMODG00000003978"; gene_name "NA"; gene_source "ncSplice"; gene_biotype "protein_coding";
4	ncSplice	transcript	154246947	154249910	.	-	.	gene_id "ENSMODG00000003978"; transcript_id "mdCircRNA-295"; gene_name "NA"; gene_biotype "protein_coding"; transcript_biotype "circRNA"; oId "ce:circNA-1973-001|ts:circNA-4897-001"; tissue "ce|ts";
4	ncSplice	exon	154246947	154247030	.	-	.	gene_id "ENSMODG00000003978"; transcript_id "mdCircRNA-295"; exon_number "1" gene_name "NA"; gene_biotype "protein_coding"; oId "ce:circNA-1973-001|ts:circNA-4897-001"; tissue "ce|ts";
4	ncSplice	exon	154249178	154249325	.	-	.	gene_id "ENSMODG00000003978"; transcript_id "mdCircRNA-295"; exon_number "2" gene_name "NA"; gene_biotype "protein_coding"; oId "ce:circNA-1973-001|ts:circNA-4897-001"; tissue "ce|ts";
4	ncSplice	exon	154249850	154249910	.	-	.	gene_id "ENSMODG00000003978"; transcript_id "mdCircRNA-295"; exon_number "3" gene_name "NA"; gene_biotype "protein_coding"; oId "ce:circNA-1973-001|ts:circNA-4897-001"; tissue "ce|ts";
4	ncSplice	gene	154320629	154329003	.	-	.	gene_id "ENSMODG00000004006"; gene_name "CACNB4"; gene_source "ncSplice"; gene_biotype "protein_coding";
4	ncSplice	transcript	154320629	154329003	.	-	.	gene_id "ENSMODG00000004006"; transcript_id "mdCircRNA-296"; gene_name "CACNB4"; gene_biotype "protein_coding"; transcript_biotype "circRNA"; oId "ce:circCACNB4-1975-001"; tissue "ce";
4	ncSplice	exon	154320629	154320724	.	-	.	gene_id "ENSMODG00000004006"; transcript_id "mdCircRNA-296"; exon_number "1" gene_name "CACNB4"; gene_biotype "protein_coding"; oId "ce:circCACNB4-1975-001"; tissue "ce";
4	ncSplice	exon	154324242	154324393	.	-	.	gene_id "ENSMODG00000004006"; transcript_id "mdCircRNA-296"; exon_number "2" gene_name "CACNB4"; gene_biotype "protein_coding"; oId "ce:circCACNB4-1975-001"; tissue "ce";
4	ncSplice	exon	154328894	154329003	.	-	.	gene_id "ENSMODG00000004006"; transcript_id "mdCircRNA-296"; exon_number "3" gene_name "CACNB4"; gene_biotype "protein_coding"; oId "ce:circCACNB4-1975-001"; tissue "ce";
4	ncSplice	gene	154676699	154684850	.	-	.	gene_id "ENSMODG00000004047"; gene_name "STAM2"; gene_source "ncSplice"; gene_biotype "protein_coding";
4	ncSplice	transcript	154676699	154684850	.	-	.	gene_id "ENSMODG00000004047"; transcript_id "mdCircRNA-297"; gene_name "STAM2"; gene_biotype "protein_coding"; transcript_biotype "circRNA"; oId "ce:circSTAM2-1979-001"; tissue "ce";
4	ncSplice	exon	154676699	154676793	.	-	.	gene_id "ENSMODG00000004047"; transcript_id "mdCircRNA-297"; exon_number "1" gene_name "STAM2"; gene_biotype "protein_coding"; oId "ce:circSTAM2-1979-001"; tissue "ce";
4	ncSplice	exon	154678068	154678257	.	-	.	gene_id "ENSMODG00000004047"; transcript_id "mdCircRNA-297"; exon_number "2" gene_name "STAM2"; gene_biotype "protein_coding"; oId "ce:circSTAM2-1979-001"; tissue "ce";
4	ncSplice	exon	154679082	154679151	.	-	.	gene_id "ENSMODG00000004047"; transcript_id "mdCircRNA-297"; exon_number "3" gene_name "STAM2"; gene_biotype "protein_coding"; oId "ce:circSTAM2-1979-001"; tissue "ce";
4	ncSplice	exon	154683367	154683513	.	-	.	gene_id "ENSMODG00000004047"; transcript_id "mdCircRNA-297"; exon_number "4" gene_name "STAM2"; gene_biotype "protein_coding"; oId "ce:circSTAM2-1979-001"; tissue "ce";
4	ncSplice	exon	154684557	154684655	.	-	.	gene_id "ENSMODG00000004047"; transcript_id "mdCircRNA-297"; exon_number "5" gene_name "STAM2"; gene_biotype "protein_coding"; oId "ce:circSTAM2-1979-001"; tissue "ce";
4	ncSplice	exon	154684775	154684850	.	-	.	gene_id "ENSMODG00000004047"; transcript_id "mdCircRNA-297"; exon_number "6" gene_name "STAM2"; gene_biotype "protein_coding"; oId "ce:circSTAM2-1979-001"; tissue "ce";
4	ncSplice	gene	163690034	163693412	.	+	.	gene_id "ENSMODG00000004479"; gene_name "NA"; gene_source "ncSplice"; gene_biotype "protein_coding";
4	ncSplice	transcript	163690034	163693412	.	+	.	gene_id "ENSMODG00000004479"; transcript_id "mdCircRNA-298"; gene_name "NA"; gene_biotype "protein_coding"; transcript_biotype "circRNA"; oId "ce:circNA-1989-001"; tissue "ce";
4	ncSplice	exon	163690034	163690165	.	+	.	gene_id "ENSMODG00000004479"; transcript_id "mdCircRNA-298"; exon_number "1" gene_name "NA"; gene_biotype "protein_coding"; oId "ce:circNA-1989-001"; tissue "ce";
4	ncSplice	exon	163690290	163690480	.	+	.	gene_id "ENSMODG00000004479"; transcript_id "mdCircRNA-298"; exon_number "2" gene_name "NA"; gene_biotype "protein_coding"; oId "ce:circNA-1989-001"; tissue "ce";
4	ncSplice	exon	163692854	163693412	.	+	.	gene_id "ENSMODG00000004479"; transcript_id "mdCircRNA-298"; exon_number "3" gene_name "NA"; gene_biotype "protein_coding"; oId "ce:circNA-1989-001"; tissue "ce";
4	ncSplice	gene	179538569	179557441	.	+	.	gene_id "ENSMODG00000008245"; gene_name "NA"; gene_source "ncSplice"; gene_biotype "protein_coding";
4	ncSplice	transcript	179538569	179557441	.	+	.	gene_id "ENSMODG00000008245"; transcript_id "mdCircRNA-299"; gene_name "NA"; gene_biotype "protein_coding"; transcript_biotype "circRNA"; oId "ce:circNA-2006-001|ts:circNA-4953-001"; tissue "ce|ts";
4	ncSplice	exon	179538569	179538708	.	+	.	gene_id "ENSMODG00000008245"; transcript_id "mdCircRNA-299"; exon_number "1" gene_name "NA"; gene_biotype "protein_coding"; oId "ce:circNA-2006-001|ts:circNA-4953-001"; tissue "ce|ts";
4	ncSplice	exon	179545266	179545421	.	+	.	gene_id "ENSMODG00000008245"; transcript_id "mdCircRNA-299"; exon_number "2" gene_name "NA"; gene_biotype "protein_coding"; oId "ce:circNA-2006-001|ts:circNA-4953-001"; tissue "ce|ts";
4	ncSplice	exon	179556733	179556876	.	+	.	gene_id "ENSMODG00000008245"; transcript_id "mdCircRNA-299"; exon_number "3" gene_name "NA"; gene_biotype "protein_coding"; oId "ce:circNA-2006-001|ts:circNA-4953-001"; tissue "ce|ts";
4	ncSplice	exon	179557392	179557441	.	+	.	gene_id "ENSMODG00000008245"; transcript_id "mdCircRNA-299"; exon_number "4" gene_name "NA"; gene_biotype "protein_coding"; oId "ce:circNA-2006-001|ts:circNA-4953-001"; tissue "ce|ts";
4	ncSplice	gene	18002392	18054428	.	-	.	gene_id "ENSMODG00000021087"; gene_name "NA"; gene_source "ncSplice"; gene_biotype "protein_coding";
4	ncSplice	transcript	18002392	18054428	.	-	.	gene_id "ENSMODG00000021087"; transcript_id "mdCircRNA-300"; gene_name "NA"; gene_biotype "protein_coding"; transcript_biotype "circRNA"; oId "ce:circNA-2020-001|ts:circNA-4985-001"; tissue "ce|ts";
4	ncSplice	exon	18002392	18002512	.	-	.	gene_id "ENSMODG00000021087"; transcript_id "mdCircRNA-300"; exon_number "1" gene_name "NA"; gene_biotype "protein_coding"; oId "ce:circNA-2020-001|ts:circNA-4985-001"; tissue "ce|ts";
4	ncSplice	exon	18014745	18014803	.	-	.	gene_id "ENSMODG00000021087"; transcript_id "mdCircRNA-300"; exon_number "2" gene_name "NA"; gene_biotype "protein_coding"; oId "ce:circNA-2020-001|ts:circNA-4985-001"; tissue "ce|ts";
4	ncSplice	exon	18037899	18037948	.	-	.	gene_id "ENSMODG00000021087"; transcript_id "mdCircRNA-300"; exon_number "3" gene_name "NA"; gene_biotype "protein_coding"; oId "ce:circNA-2020-001|ts:circNA-4985-001"; tissue "ce|ts";
4	ncSplice	exon	18054320	18054428	.	-	.	gene_id "ENSMODG00000021087"; transcript_id "mdCircRNA-300"; exon_number "4" gene_name "NA"; gene_biotype "protein_coding"; oId "ce:circNA-2020-001|ts:circNA-4985-001"; tissue "ce|ts";
4	ncSplice	gene	217256334	217271771	.	-	.	gene_id "ENSMODG00000012170"; gene_name "HECW2"; gene_source "ncSplice"; gene_biotype "protein_coding";
4	ncSplice	transcript	217256334	217271771	.	-	.	gene_id "ENSMODG00000012170"; transcript_id "mdCircRNA-301"; gene_name "HECW2"; gene_biotype "protein_coding"; transcript_biotype "circRNA"; oId "ce:circHECW2-2054-001"; tissue "ce";
4	ncSplice	exon	217256334	217256519	.	-	.	gene_id "ENSMODG00000012170"; transcript_id "mdCircRNA-301"; exon_number "1" gene_name "HECW2"; gene_biotype "protein_coding"; oId "ce:circHECW2-2054-001"; tissue "ce";
4	ncSplice	exon	217270160	217270284	.	-	.	gene_id "ENSMODG00000012170"; transcript_id "mdCircRNA-301"; exon_number "2" gene_name "HECW2"; gene_biotype "protein_coding"; oId "ce:circHECW2-2054-001"; tissue "ce";
4	ncSplice	exon	217270824	217270927	.	-	.	gene_id "ENSMODG00000012170"; transcript_id "mdCircRNA-301"; exon_number "3" gene_name "HECW2"; gene_biotype "protein_coding"; oId "ce:circHECW2-2054-001"; tissue "ce";
4	ncSplice	exon	217271621	217271771	.	-	.	gene_id "ENSMODG00000012170"; transcript_id "mdCircRNA-301"; exon_number "4" gene_name "HECW2"; gene_biotype "protein_coding"; oId "ce:circHECW2-2054-001"; tissue "ce";
4	ncSplice	gene	22339491	22340881	.	-	.	gene_id "ENSMODG00000021097"; gene_name "NA"; gene_source "ncSplice"; gene_biotype "protein_coding";
4	ncSplice	transcript	22339491	22340881	.	-	.	gene_id "ENSMODG00000021097"; transcript_id "mdCircRNA-302"; gene_name "NA"; gene_biotype "protein_coding"; transcript_biotype "circRNA"; oId "ce:circNA-2062-001"; tissue "ce";
4	ncSplice	exon	22339491	22339590	.	-	.	gene_id "ENSMODG00000021097"; transcript_id "mdCircRNA-302"; exon_number "1" gene_name "NA"; gene_biotype "protein_coding"; oId "ce:circNA-2062-001"; tissue "ce";
4	ncSplice	exon	22339671	22339829	.	-	.	gene_id "ENSMODG00000021097"; transcript_id "mdCircRNA-302"; exon_number "2" gene_name "NA"; gene_biotype "protein_coding"; oId "ce:circNA-2062-001"; tissue "ce";
4	ncSplice	exon	22340749	22340881	.	-	.	gene_id "ENSMODG00000021097"; transcript_id "mdCircRNA-302"; exon_number "3" gene_name "NA"; gene_biotype "protein_coding"; oId "ce:circNA-2062-001"; tissue "ce";
4	ncSplice	gene	240894581	240897216	.	-	.	gene_id "ENSMODG00000014369"; gene_name "BCO2"; gene_source "ncSplice"; gene_biotype "protein_coding";
4	ncSplice	transcript	240894581	240897216	.	-	.	gene_id "ENSMODG00000014369"; transcript_id "mdCircRNA-303"; gene_name "BCO2"; gene_biotype "protein_coding"; transcript_biotype "circRNA"; oId "ce:circBCO2-2086-001"; tissue "ce";
4	ncSplice	exon	240894581	240894683	.	-	.	gene_id "ENSMODG00000014369"; transcript_id "mdCircRNA-303"; exon_number "1" gene_name "BCO2"; gene_biotype "protein_coding"; oId "ce:circBCO2-2086-001"; tissue "ce";
4	ncSplice	exon	240896337	240896452	.	-	.	gene_id "ENSMODG00000014369"; transcript_id "mdCircRNA-303"; exon_number "2" gene_name "BCO2"; gene_biotype "protein_coding"; oId "ce:circBCO2-2086-001"; tissue "ce";
4	ncSplice	exon	240897005	240897216	.	-	.	gene_id "ENSMODG00000014369"; transcript_id "mdCircRNA-303"; exon_number "3" gene_name "BCO2"; gene_biotype "protein_coding"; oId "ce:circBCO2-2086-001"; tissue "ce";
4	ncSplice	gene	274020855	274021975	.	-	.	gene_id "ENSMODG00000004222"; gene_name "PUS3"; gene_source "ncSplice"; gene_biotype "protein_coding";
4	ncSplice	transcript	274020855	274021975	.	-	.	gene_id "ENSMODG00000004222"; transcript_id "mdCircRNA-304"; gene_name "PUS3"; gene_biotype "protein_coding"; transcript_biotype "circRNA"; oId "ce:circPUS3-2107-001|ts:circPUS3-5200-001"; tissue "ce|ts";
4	ncSplice	exon	274020855	274021426	.	-	.	gene_id "ENSMODG00000004222"; transcript_id "mdCircRNA-304"; exon_number "1" gene_name "PUS3"; gene_biotype "protein_coding"; oId "ce:circPUS3-2107-001|ts:circPUS3-5200-001"; tissue "ce|ts";
4	ncSplice	exon	274021549	274021975	.	-	.	gene_id "ENSMODG00000004222"; transcript_id "mdCircRNA-304"; exon_number "2" gene_name "PUS3"; gene_biotype "protein_coding"; oId "ce:circPUS3-2107-001|ts:circPUS3-5200-001"; tissue "ce|ts";
4	ncSplice	gene	307771964	307776708	.	+	.	gene_id "ENSMODG00000009914"; gene_name "NBEA"; gene_source "ncSplice"; gene_biotype "protein_coding";
4	ncSplice	transcript	307771964	307776708	.	+	.	gene_id "ENSMODG00000009914"; transcript_id "mdCircRNA-305"; gene_name "NBEA"; gene_biotype "protein_coding"; transcript_biotype "circRNA"; oId "ce:circNBEA-2141-001|ts:circNBEA-5318-001"; tissue "ce|ts";
4	ncSplice	exon	307771964	307772195	.	+	.	gene_id "ENSMODG00000009914"; transcript_id "mdCircRNA-305"; exon_number "1" gene_name "NBEA"; gene_biotype "protein_coding"; oId "ce:circNBEA-2141-001|ts:circNBEA-5318-001"; tissue "ce|ts";
4	ncSplice	exon	307776261	307776361	.	+	.	gene_id "ENSMODG00000009914"; transcript_id "mdCircRNA-305"; exon_number "2" gene_name "NBEA"; gene_biotype "protein_coding"; oId "ce:circNBEA-2141-001|ts:circNBEA-5318-001"; tissue "ce|ts";
4	ncSplice	exon	307776613	307776708	.	+	.	gene_id "ENSMODG00000009914"; transcript_id "mdCircRNA-305"; exon_number "3" gene_name "NBEA"; gene_biotype "protein_coding"; oId "ce:circNBEA-2141-001|ts:circNBEA-5318-001"; tissue "ce|ts";
4	ncSplice	gene	3352034	3364789	.	+	.	gene_id "ENSMODG00000020973"; gene_name "BRWD1"; gene_source "ncSplice"; gene_biotype "protein_coding";
4	ncSplice	transcript	3352034	3364789	.	+	.	gene_id "ENSMODG00000020973"; transcript_id "mdCircRNA-306"; gene_name "BRWD1"; gene_biotype "protein_coding"; transcript_biotype "circRNA"; oId "ce:circBRWD1-2175-001"; tissue "ce";
4	ncSplice	exon	3352034	3352134	.	+	.	gene_id "ENSMODG00000020973"; transcript_id "mdCircRNA-306"; exon_number "1" gene_name "BRWD1"; gene_biotype "protein_coding"; oId "ce:circBRWD1-2175-001"; tissue "ce";
4	ncSplice	exon	3352672	3352742	.	+	.	gene_id "ENSMODG00000020973"; transcript_id "mdCircRNA-306"; exon_number "2" gene_name "BRWD1"; gene_biotype "protein_coding"; oId "ce:circBRWD1-2175-001"; tissue "ce";
4	ncSplice	exon	3353518	3353618	.	+	.	gene_id "ENSMODG00000020973"; transcript_id "mdCircRNA-306"; exon_number "3" gene_name "BRWD1"; gene_biotype "protein_coding"; oId "ce:circBRWD1-2175-001"; tissue "ce";
4	ncSplice	exon	3354127	3354167	.	+	.	gene_id "ENSMODG00000020973"; transcript_id "mdCircRNA-306"; exon_number "4" gene_name "BRWD1"; gene_biotype "protein_coding"; oId "ce:circBRWD1-2175-001"; tissue "ce";
4	ncSplice	exon	3364691	3364789	.	+	.	gene_id "ENSMODG00000020973"; transcript_id "mdCircRNA-306"; exon_number "5" gene_name "BRWD1"; gene_biotype "protein_coding"; oId "ce:circBRWD1-2175-001"; tissue "ce";
4	ncSplice	gene	390182318	390186219	.	-	.	gene_id "ENSMODG00000006543"; gene_name "CEP104"; gene_source "ncSplice"; gene_biotype "protein_coding";
4	ncSplice	transcript	390182318	390186219	.	-	.	gene_id "ENSMODG00000006543"; transcript_id "mdCircRNA-307"; gene_name "CEP104"; gene_biotype "protein_coding"; transcript_biotype "circRNA"; oId "ce:circCEP104-2227-001"; tissue "ce";
4	ncSplice	exon	390182318	390182456	.	-	.	gene_id "ENSMODG00000006543"; transcript_id "mdCircRNA-307"; exon_number "1" gene_name "CEP104"; gene_biotype "protein_coding"; oId "ce:circCEP104-2227-001"; tissue "ce";
4	ncSplice	exon	390183080	390183253	.	-	.	gene_id "ENSMODG00000006543"; transcript_id "mdCircRNA-307"; exon_number "2" gene_name "CEP104"; gene_biotype "protein_coding"; oId "ce:circCEP104-2227-001"; tissue "ce";
4	ncSplice	exon	390186093	390186219	.	-	.	gene_id "ENSMODG00000006543"; transcript_id "mdCircRNA-307"; exon_number "3" gene_name "CEP104"; gene_biotype "protein_coding"; oId "ce:circCEP104-2227-001"; tissue "ce";
4	ncSplice	gene	403507910	403510767	.	+	.	gene_id "ENSMODG00000028218"; gene_name "NA"; gene_source "ncSplice"; gene_biotype "protein_coding";
4	ncSplice	transcript	403507910	403510767	.	+	.	gene_id "ENSMODG00000028218"; transcript_id "mdCircRNA-308"; gene_name "NA"; gene_biotype "protein_coding"; transcript_biotype "circRNA"; oId "ce:circNA-2234-001|ts:circNA-5592-001"; tissue "ce|ts";
4	ncSplice	exon	403507910	403508036	.	+	.	gene_id "ENSMODG00000028218"; transcript_id "mdCircRNA-308"; exon_number "1" gene_name "NA"; gene_biotype "protein_coding"; oId "ce:circNA-2234-001|ts:circNA-5592-001"; tissue "ce|ts";
4	ncSplice	exon	403509624	403509719	.	+	.	gene_id "ENSMODG00000028218"; transcript_id "mdCircRNA-308"; exon_number "2" gene_name "NA"; gene_biotype "protein_coding"; oId "ce:circNA-2234-001|ts:circNA-5592-001"; tissue "ce|ts";
4	ncSplice	exon	403510631	403510767	.	+	.	gene_id "ENSMODG00000028218"; transcript_id "mdCircRNA-308"; exon_number "3" gene_name "NA"; gene_biotype "protein_coding"; oId "ce:circNA-2234-001|ts:circNA-5592-001"; tissue "ce|ts";
4	ncSplice	gene	423808563	423816847	.	-	.	gene_id "ENSMODG00000017650"; gene_name "TRIT1"; gene_source "ncSplice"; gene_biotype "protein_coding";
4	ncSplice	transcript	423808563	423816847	.	-	.	gene_id "ENSMODG00000017650"; transcript_id "mdCircRNA-309"; gene_name "TRIT1"; gene_biotype "protein_coding"; transcript_biotype "circRNA"; oId "ce:circTRIT1-2258-001|ts:circTRIT1-5642-001"; tissue "ce|ts";
4	ncSplice	exon	423808563	423808705	.	-	.	gene_id "ENSMODG00000017650"; transcript_id "mdCircRNA-309"; exon_number "1" gene_name "TRIT1"; gene_biotype "protein_coding"; oId "ce:circTRIT1-2258-001|ts:circTRIT1-5642-001"; tissue "ce|ts";
4	ncSplice	exon	423813911	423816847	.	-	.	gene_id "ENSMODG00000017650"; transcript_id "mdCircRNA-309"; exon_number "2" gene_name "TRIT1"; gene_biotype "protein_coding"; oId "ce:circTRIT1-2258-001|ts:circTRIT1-5642-001"; tissue "ce|ts";
4	ncSplice	gene	427239046	427264504	.	-	.	gene_id "ENSMODG00000017337"; gene_name "SCMH1"; gene_source "ncSplice"; gene_biotype "protein_coding";
4	ncSplice	transcript	427239046	427264504	.	-	.	gene_id "ENSMODG00000017337"; transcript_id "mdCircRNA-310"; gene_name "SCMH1"; gene_biotype "protein_coding"; transcript_biotype "circRNA"; oId "ce:circSCMH1-2264-001"; tissue "ce";
4	ncSplice	exon	427239046	427239289	.	-	.	gene_id "ENSMODG00000017337"; transcript_id "mdCircRNA-310"; exon_number "1" gene_name "SCMH1"; gene_biotype "protein_coding"; oId "ce:circSCMH1-2264-001"; tissue "ce";
4	ncSplice	exon	427239520	427239608	.	-	.	gene_id "ENSMODG00000017337"; transcript_id "mdCircRNA-310"; exon_number "2" gene_name "SCMH1"; gene_biotype "protein_coding"; oId "ce:circSCMH1-2264-001"; tissue "ce";
4	ncSplice	exon	427246471	427246705	.	-	.	gene_id "ENSMODG00000017337"; transcript_id "mdCircRNA-310"; exon_number "3" gene_name "SCMH1"; gene_biotype "protein_coding"; oId "ce:circSCMH1-2264-001"; tissue "ce";
4	ncSplice	exon	427247920	427264504	.	-	.	gene_id "ENSMODG00000017337"; transcript_id "mdCircRNA-310"; exon_number "4" gene_name "SCMH1"; gene_biotype "protein_coding"; oId "ce:circSCMH1-2264-001"; tissue "ce";
4	ncSplice	gene	431169649	431171135	.	+	.	gene_id "ENSMODG00000017067"; gene_name "PUM1"; gene_source "ncSplice"; gene_biotype "protein_coding";
4	ncSplice	transcript	431169649	431171135	.	+	.	gene_id "ENSMODG00000017067"; transcript_id "mdCircRNA-311"; gene_name "PUM1"; gene_biotype "protein_coding"; transcript_biotype "circRNA"; oId "ce:circPUM1-2267-001|ts:circPUM1-5671-001"; tissue "ce|ts";
4	ncSplice	exon	431169649	431169757	.	+	.	gene_id "ENSMODG00000017067"; transcript_id "mdCircRNA-311"; exon_number "1" gene_name "PUM1"; gene_biotype "protein_coding"; oId "ce:circPUM1-2267-001|ts:circPUM1-5671-001"; tissue "ce|ts";
4	ncSplice	exon	431170957	431171135	.	+	.	gene_id "ENSMODG00000017067"; transcript_id "mdCircRNA-311"; exon_number "2" gene_name "PUM1"; gene_biotype "protein_coding"; oId "ce:circPUM1-2267-001|ts:circPUM1-5671-001"; tissue "ce|ts";
4	ncSplice	gene	434407764	434423813	.	+	.	gene_id "ENSMODG00000009563"; gene_name "RERE"; gene_source "ncSplice"; gene_biotype "protein_coding";
4	ncSplice	transcript	434407764	434423813	.	+	.	gene_id "ENSMODG00000009563"; transcript_id "mdCircRNA-312"; gene_name "RERE"; gene_biotype "protein_coding"; transcript_biotype "circRNA"; oId "ce:circRERE-2273-001|ts:circRERE-5695-001"; tissue "ce|ts";
4	ncSplice	exon	434407764	434407869	.	+	.	gene_id "ENSMODG00000009563"; transcript_id "mdCircRNA-312"; exon_number "1" gene_name "RERE"; gene_biotype "protein_coding"; oId "ce:circRERE-2273-001|ts:circRERE-5695-001"; tissue "ce|ts";
4	ncSplice	exon	434411252	434411348	.	+	.	gene_id "ENSMODG00000009563"; transcript_id "mdCircRNA-312"; exon_number "2" gene_name "RERE"; gene_biotype "protein_coding"; oId "ce:circRERE-2273-001|ts:circRERE-5695-001"; tissue "ce|ts";
4	ncSplice	exon	434423709	434423813	.	+	.	gene_id "ENSMODG00000009563"; transcript_id "mdCircRNA-312"; exon_number "3" gene_name "RERE"; gene_biotype "protein_coding"; oId "ce:circRERE-2273-001|ts:circRERE-5695-001"; tissue "ce|ts";
4	ncSplice	gene	434407764	434461141	.	+	.	gene_id "ENSMODG00000009563"; gene_name "RERE"; gene_source "ncSplice"; gene_biotype "protein_coding";
4	ncSplice	transcript	434407764	434461141	.	+	.	gene_id "ENSMODG00000009563"; transcript_id "mdCircRNA-313"; gene_name "RERE"; gene_biotype "protein_coding"; transcript_biotype "circRNA"; oId "ce:circRERE-2274-001"; tissue "ce";
4	ncSplice	exon	434407764	434407869	.	+	.	gene_id "ENSMODG00000009563"; transcript_id "mdCircRNA-313"; exon_number "1" gene_name "RERE"; gene_biotype "protein_coding"; oId "ce:circRERE-2274-001"; tissue "ce";
4	ncSplice	exon	434411252	434411348	.	+	.	gene_id "ENSMODG00000009563"; transcript_id "mdCircRNA-313"; exon_number "2" gene_name "RERE"; gene_biotype "protein_coding"; oId "ce:circRERE-2274-001"; tissue "ce";
4	ncSplice	exon	434423709	434423813	.	+	.	gene_id "ENSMODG00000009563"; transcript_id "mdCircRNA-313"; exon_number "3" gene_name "RERE"; gene_biotype "protein_coding"; oId "ce:circRERE-2274-001"; tissue "ce";
4	ncSplice	exon	434454363	434454411	.	+	.	gene_id "ENSMODG00000009563"; transcript_id "mdCircRNA-313"; exon_number "4" gene_name "RERE"; gene_biotype "protein_coding"; oId "ce:circRERE-2274-001"; tissue "ce";
4	ncSplice	exon	434458077	434458201	.	+	.	gene_id "ENSMODG00000009563"; transcript_id "mdCircRNA-313"; exon_number "5" gene_name "RERE"; gene_biotype "protein_coding"; oId "ce:circRERE-2274-001"; tissue "ce";
4	ncSplice	exon	434461042	434461141	.	+	.	gene_id "ENSMODG00000009563"; transcript_id "mdCircRNA-313"; exon_number "6" gene_name "RERE"; gene_biotype "protein_coding"; oId "ce:circRERE-2274-001"; tissue "ce";
4	ncSplice	gene	434454363	434490905	.	+	.	gene_id "ENSMODG00000009563"; gene_name "RERE"; gene_source "ncSplice"; gene_biotype "protein_coding";
4	ncSplice	transcript	434454363	434490905	.	+	.	gene_id "ENSMODG00000009563"; transcript_id "mdCircRNA-314"; gene_name "RERE"; gene_biotype "protein_coding"; transcript_biotype "circRNA"; oId "ce:circRERE-2278-001"; tissue "ce";
4	ncSplice	exon	434454363	434454411	.	+	.	gene_id "ENSMODG00000009563"; transcript_id "mdCircRNA-314"; exon_number "1" gene_name "RERE"; gene_biotype "protein_coding"; oId "ce:circRERE-2278-001"; tissue "ce";
4	ncSplice	exon	434458077	434458201	.	+	.	gene_id "ENSMODG00000009563"; transcript_id "mdCircRNA-314"; exon_number "2" gene_name "RERE"; gene_biotype "protein_coding"; oId "ce:circRERE-2278-001"; tissue "ce";
4	ncSplice	exon	434461042	434461141	.	+	.	gene_id "ENSMODG00000009563"; transcript_id "mdCircRNA-314"; exon_number "3" gene_name "RERE"; gene_biotype "protein_coding"; oId "ce:circRERE-2278-001"; tissue "ce";
4	ncSplice	exon	434490807	434490905	.	+	.	gene_id "ENSMODG00000009563"; transcript_id "mdCircRNA-314"; exon_number "4" gene_name "RERE"; gene_biotype "protein_coding"; oId "ce:circRERE-2278-001"; tissue "ce";
4	ncSplice	gene	4564684	4574522	.	-	.	gene_id "ENSMODG00000020982"; gene_name "DYRK1A"; gene_source "ncSplice"; gene_biotype "protein_coding";
4	ncSplice	transcript	4564684	4574522	.	-	.	gene_id "ENSMODG00000020982"; transcript_id "mdCircRNA-315"; gene_name "DYRK1A"; gene_biotype "protein_coding"; transcript_biotype "circRNA"; oId "ce:circDYRK1A-2281-001|ts:circDYRK1A-5704-001"; tissue "ce|ts";
4	ncSplice	exon	4564684	4564831	.	-	.	gene_id "ENSMODG00000020982"; transcript_id "mdCircRNA-315"; exon_number "1" gene_name "DYRK1A"; gene_biotype "protein_coding"; oId "ce:circDYRK1A-2281-001|ts:circDYRK1A-5704-001"; tissue "ce|ts";
4	ncSplice	exon	4572916	4573104	.	-	.	gene_id "ENSMODG00000020982"; transcript_id "mdCircRNA-315"; exon_number "2" gene_name "DYRK1A"; gene_biotype "protein_coding"; oId "ce:circDYRK1A-2281-001|ts:circDYRK1A-5704-001"; tissue "ce|ts";
4	ncSplice	exon	4574430	4574522	.	-	.	gene_id "ENSMODG00000020982"; transcript_id "mdCircRNA-315"; exon_number "3" gene_name "DYRK1A"; gene_biotype "protein_coding"; oId "ce:circDYRK1A-2281-001|ts:circDYRK1A-5704-001"; tissue "ce|ts";
4	ncSplice	gene	45753529	45775331	.	-	.	gene_id "ENSMODG00000007897"; gene_name "NA"; gene_source "ncSplice"; gene_biotype "protein_coding";
4	ncSplice	transcript	45753529	45775331	.	-	.	gene_id "ENSMODG00000007897"; transcript_id "mdCircRNA-316"; gene_name "NA"; gene_biotype "protein_coding"; transcript_biotype "circRNA"; oId "ce:circNA-2283-001"; tissue "ce";
4	ncSplice	exon	45753529	45753644	.	-	.	gene_id "ENSMODG00000007897"; transcript_id "mdCircRNA-316"; exon_number "1" gene_name "NA"; gene_biotype "protein_coding"; oId "ce:circNA-2283-001"; tissue "ce";
4	ncSplice	exon	45764046	45764125	.	-	.	gene_id "ENSMODG00000007897"; transcript_id "mdCircRNA-316"; exon_number "2" gene_name "NA"; gene_biotype "protein_coding"; oId "ce:circNA-2283-001"; tissue "ce";
4	ncSplice	exon	45769078	45769192	.	-	.	gene_id "ENSMODG00000007897"; transcript_id "mdCircRNA-316"; exon_number "3" gene_name "NA"; gene_biotype "protein_coding"; oId "ce:circNA-2283-001"; tissue "ce";
4	ncSplice	exon	45775244	45775331	.	-	.	gene_id "ENSMODG00000007897"; transcript_id "mdCircRNA-316"; exon_number "4" gene_name "NA"; gene_biotype "protein_coding"; oId "ce:circNA-2283-001"; tissue "ce";
4	ncSplice	gene	66717919	66719049	.	-	.	gene_id "ENSMODG00000002417"; gene_name "NA"; gene_source "ncSplice"; gene_biotype "protein_coding";
4	ncSplice	transcript	66717919	66719049	.	-	.	gene_id "ENSMODG00000002417"; transcript_id "mdCircRNA-317"; gene_name "NA"; gene_biotype "protein_coding"; transcript_biotype "circRNA"; oId "ce:circNA-2297-001"; tissue "ce";
4	ncSplice	exon	66717919	66717985	.	-	.	gene_id "ENSMODG00000002417"; transcript_id "mdCircRNA-317"; exon_number "1" gene_name "NA"; gene_biotype "protein_coding"; oId "ce:circNA-2297-001"; tissue "ce";
4	ncSplice	exon	66718940	66719049	.	-	.	gene_id "ENSMODG00000002417"; transcript_id "mdCircRNA-317"; exon_number "2" gene_name "NA"; gene_biotype "protein_coding"; oId "ce:circNA-2297-001"; tissue "ce";
4	ncSplice	gene	67683802	67708494	.	-	.	gene_id "ENSMODG00000018047"; gene_name "IFT57"; gene_source "ncSplice"; gene_biotype "protein_coding";
4	ncSplice	transcript	67683802	67708494	.	-	.	gene_id "ENSMODG00000018047"; transcript_id "mdCircRNA-318"; gene_name "IFT57"; gene_biotype "protein_coding"; transcript_biotype "circRNA"; oId "ce:circIFT57-2300-001"; tissue "ce";
4	ncSplice	exon	67683802	67683924	.	-	.	gene_id "ENSMODG00000018047"; transcript_id "mdCircRNA-318"; exon_number "1" gene_name "IFT57"; gene_biotype "protein_coding"; oId "ce:circIFT57-2300-001"; tissue "ce";
4	ncSplice	exon	67701518	67701586	.	-	.	gene_id "ENSMODG00000018047"; transcript_id "mdCircRNA-318"; exon_number "2" gene_name "IFT57"; gene_biotype "protein_coding"; oId "ce:circIFT57-2300-001"; tissue "ce";
4	ncSplice	exon	67707373	67707463	.	-	.	gene_id "ENSMODG00000018047"; transcript_id "mdCircRNA-318"; exon_number "3" gene_name "IFT57"; gene_biotype "protein_coding"; oId "ce:circIFT57-2300-001"; tissue "ce";
4	ncSplice	exon	67708376	67708494	.	-	.	gene_id "ENSMODG00000018047"; transcript_id "mdCircRNA-318"; exon_number "4" gene_name "IFT57"; gene_biotype "protein_coding"; oId "ce:circIFT57-2300-001"; tissue "ce";
4	ncSplice	gene	67707373	67708494	.	-	.	gene_id "ENSMODG00000018047"; gene_name "IFT57"; gene_source "ncSplice"; gene_biotype "protein_coding";
4	ncSplice	transcript	67707373	67708494	.	-	.	gene_id "ENSMODG00000018047"; transcript_id "mdCircRNA-319"; gene_name "IFT57"; gene_biotype "protein_coding"; transcript_biotype "circRNA"; oId "ce:circIFT57-2302-001"; tissue "ce";
4	ncSplice	exon	67707373	67707463	.	-	.	gene_id "ENSMODG00000018047"; transcript_id "mdCircRNA-319"; exon_number "1" gene_name "IFT57"; gene_biotype "protein_coding"; oId "ce:circIFT57-2302-001"; tissue "ce";
4	ncSplice	exon	67708376	67708494	.	-	.	gene_id "ENSMODG00000018047"; transcript_id "mdCircRNA-319"; exon_number "2" gene_name "IFT57"; gene_biotype "protein_coding"; oId "ce:circIFT57-2302-001"; tissue "ce";
4	ncSplice	gene	6821181	6825515	.	+	.	gene_id "ENSMODG00000021004"; gene_name "MORC3"; gene_source "ncSplice"; gene_biotype "protein_coding";
4	ncSplice	transcript	6821181	6825515	.	+	.	gene_id "ENSMODG00000021004"; transcript_id "mdCircRNA-320"; gene_name "MORC3"; gene_biotype "protein_coding"; transcript_biotype "circRNA"; oId "ce:circMORC3-2303-001|ts:circMORC3-5747-001"; tissue "ce|ts";
4	ncSplice	exon	6821181	6821323	.	+	.	gene_id "ENSMODG00000021004"; transcript_id "mdCircRNA-320"; exon_number "1" gene_name "MORC3"; gene_biotype "protein_coding"; oId "ce:circMORC3-2303-001|ts:circMORC3-5747-001"; tissue "ce|ts";
4	ncSplice	exon	6822946	6823093	.	+	.	gene_id "ENSMODG00000021004"; transcript_id "mdCircRNA-320"; exon_number "2" gene_name "MORC3"; gene_biotype "protein_coding"; oId "ce:circMORC3-2303-001|ts:circMORC3-5747-001"; tissue "ce|ts";
4	ncSplice	exon	6825384	6825515	.	+	.	gene_id "ENSMODG00000021004"; transcript_id "mdCircRNA-320"; exon_number "3" gene_name "MORC3"; gene_biotype "protein_coding"; oId "ce:circMORC3-2303-001|ts:circMORC3-5747-001"; tissue "ce|ts";
4	ncSplice	gene	7398811	7439818	.	-	.	gene_id "ENSMODG00000021009"; gene_name "HLCS"; gene_source "ncSplice"; gene_biotype "protein_coding";
4	ncSplice	transcript	7398811	7439818	.	-	.	gene_id "ENSMODG00000021009"; transcript_id "mdCircRNA-321"; gene_name "HLCS"; gene_biotype "protein_coding"; transcript_biotype "circRNA"; oId "ce:circHLCS-2307-001|ts:circHLCS-5765-001"; tissue "ce|ts";
4	ncSplice	exon	7398811	7399082	.	-	.	gene_id "ENSMODG00000021009"; transcript_id "mdCircRNA-321"; exon_number "1" gene_name "HLCS"; gene_biotype "protein_coding"; oId "ce:circHLCS-2307-001|ts:circHLCS-5765-001"; tissue "ce|ts";
4	ncSplice	exon	7419396	7419575	.	-	.	gene_id "ENSMODG00000021009"; transcript_id "mdCircRNA-321"; exon_number "2" gene_name "HLCS"; gene_biotype "protein_coding"; oId "ce:circHLCS-2307-001|ts:circHLCS-5765-001"; tissue "ce|ts";
4	ncSplice	exon	7423698	7424635	.	-	.	gene_id "ENSMODG00000021009"; transcript_id "mdCircRNA-321"; exon_number "3" gene_name "HLCS"; gene_biotype "protein_coding"; oId "ce:circHLCS-2307-001|ts:circHLCS-5765-001"; tissue "ce|ts";
4	ncSplice	exon	7425517	7425679	.	-	.	gene_id "ENSMODG00000021009"; transcript_id "mdCircRNA-321"; exon_number "4" gene_name "HLCS"; gene_biotype "protein_coding"; oId "ce:circHLCS-2307-001|ts:circHLCS-5765-001"; tissue "ce|ts";
4	ncSplice	exon	7439666	7439818	.	-	.	gene_id "ENSMODG00000021009"; transcript_id "mdCircRNA-321"; exon_number "5" gene_name "HLCS"; gene_biotype "protein_coding"; oId "ce:circHLCS-2307-001|ts:circHLCS-5765-001"; tissue "ce|ts";
4	ncSplice	gene	85290903	85345809	.	+	.	gene_id "ENSMODG00000018243"; gene_name "STXBP5L"; gene_source "ncSplice"; gene_biotype "protein_coding";
4	ncSplice	transcript	85290903	85345809	.	+	.	gene_id "ENSMODG00000018243"; transcript_id "mdCircRNA-322"; gene_name "STXBP5L"; gene_biotype "protein_coding"; transcript_biotype "circRNA"; oId "ce:circSTXBP5L-2319-001"; tissue "ce";
4	ncSplice	exon	85290903	85290986	.	+	.	gene_id "ENSMODG00000018243"; transcript_id "mdCircRNA-322"; exon_number "1" gene_name "STXBP5L"; gene_biotype "protein_coding"; oId "ce:circSTXBP5L-2319-001"; tissue "ce";
4	ncSplice	exon	85311002	85311125	.	+	.	gene_id "ENSMODG00000018243"; transcript_id "mdCircRNA-322"; exon_number "2" gene_name "STXBP5L"; gene_biotype "protein_coding"; oId "ce:circSTXBP5L-2319-001"; tissue "ce";
4	ncSplice	exon	85330332	85330410	.	+	.	gene_id "ENSMODG00000018243"; transcript_id "mdCircRNA-322"; exon_number "3" gene_name "STXBP5L"; gene_biotype "protein_coding"; oId "ce:circSTXBP5L-2319-001"; tissue "ce";
4	ncSplice	exon	85334333	85334487	.	+	.	gene_id "ENSMODG00000018243"; transcript_id "mdCircRNA-322"; exon_number "4" gene_name "STXBP5L"; gene_biotype "protein_coding"; oId "ce:circSTXBP5L-2319-001"; tissue "ce";
4	ncSplice	exon	85340763	85340835	.	+	.	gene_id "ENSMODG00000018243"; transcript_id "mdCircRNA-322"; exon_number "5" gene_name "STXBP5L"; gene_biotype "protein_coding"; oId "ce:circSTXBP5L-2319-001"; tissue "ce";
4	ncSplice	exon	85345662	85345809	.	+	.	gene_id "ENSMODG00000018243"; transcript_id "mdCircRNA-322"; exon_number "6" gene_name "STXBP5L"; gene_biotype "protein_coding"; oId "ce:circSTXBP5L-2319-001"; tissue "ce";
4	ncSplice	gene	88072722	88081511	.	+	.	gene_id "ENSMODG00000018328"; gene_name "PDIA5"; gene_source "ncSplice"; gene_biotype "protein_coding";
4	ncSplice	transcript	88072722	88081511	.	+	.	gene_id "ENSMODG00000018328"; transcript_id "mdCircRNA-323"; gene_name "PDIA5"; gene_biotype "protein_coding"; transcript_biotype "circRNA"; oId "ce:circPDIA5-2326-001|ts:circPDIA5-5837-001"; tissue "ce|ts";
4	ncSplice	exon	88072722	88072805	.	+	.	gene_id "ENSMODG00000018328"; transcript_id "mdCircRNA-323"; exon_number "1" gene_name "PDIA5"; gene_biotype "protein_coding"; oId "ce:circPDIA5-2326-001|ts:circPDIA5-5837-001"; tissue "ce|ts";
4	ncSplice	exon	88073013	88073058	.	+	.	gene_id "ENSMODG00000018328"; transcript_id "mdCircRNA-323"; exon_number "2" gene_name "PDIA5"; gene_biotype "protein_coding"; oId "ce:circPDIA5-2326-001|ts:circPDIA5-5837-001"; tissue "ce|ts";
4	ncSplice	exon	88079347	88079439	.	+	.	gene_id "ENSMODG00000018328"; transcript_id "mdCircRNA-323"; exon_number "3" gene_name "PDIA5"; gene_biotype "protein_coding"; oId "ce:circPDIA5-2326-001|ts:circPDIA5-5837-001"; tissue "ce|ts";
4	ncSplice	exon	88081451	88081511	.	+	.	gene_id "ENSMODG00000018328"; transcript_id "mdCircRNA-323"; exon_number "4" gene_name "PDIA5"; gene_biotype "protein_coding"; oId "ce:circPDIA5-2326-001|ts:circPDIA5-5837-001"; tissue "ce|ts";
5	ncSplice	gene	118554244	118571991	.	-	.	gene_id "ENSMODG00000001807"; gene_name "GRIA2"; gene_source "ncSplice"; gene_biotype "protein_coding";
5	ncSplice	transcript	118554244	118571991	.	-	.	gene_id "ENSMODG00000001807"; transcript_id "mdCircRNA-324"; gene_name "GRIA2"; gene_biotype "protein_coding"; transcript_biotype "circRNA"; oId "ce:circGRIA2-2366-001"; tissue "ce";
5	ncSplice	exon	118554244	118554405	.	-	.	gene_id "ENSMODG00000001807"; transcript_id "mdCircRNA-324"; exon_number "1" gene_name "GRIA2"; gene_biotype "protein_coding"; oId "ce:circGRIA2-2366-001"; tissue "ce";
5	ncSplice	exon	118556489	118556542	.	-	.	gene_id "ENSMODG00000001807"; transcript_id "mdCircRNA-324"; exon_number "2" gene_name "GRIA2"; gene_biotype "protein_coding"; oId "ce:circGRIA2-2366-001"; tissue "ce";
5	ncSplice	exon	118562230	118571991	.	-	.	gene_id "ENSMODG00000001807"; transcript_id "mdCircRNA-324"; exon_number "3" gene_name "GRIA2"; gene_biotype "protein_coding"; oId "ce:circGRIA2-2366-001"; tissue "ce";
5	ncSplice	gene	1353810	1370556	.	+	.	gene_id "ENSMODG00000012274"; gene_name "C4orf29"; gene_source "ncSplice"; gene_biotype "protein_coding";
5	ncSplice	transcript	1353810	1370556	.	+	.	gene_id "ENSMODG00000012274"; transcript_id "mdCircRNA-325"; gene_name "C4orf29"; gene_biotype "protein_coding"; transcript_biotype "circRNA"; oId "ce:circC4orf29-2383-001"; tissue "ce";
5	ncSplice	exon	1353810	1353910	.	+	.	gene_id "ENSMODG00000012274"; transcript_id "mdCircRNA-325"; exon_number "1" gene_name "C4orf29"; gene_biotype "protein_coding"; oId "ce:circC4orf29-2383-001"; tissue "ce";
5	ncSplice	exon	1363101	1363179	.	+	.	gene_id "ENSMODG00000012274"; transcript_id "mdCircRNA-325"; exon_number "2" gene_name "C4orf29"; gene_biotype "protein_coding"; oId "ce:circC4orf29-2383-001"; tissue "ce";
5	ncSplice	exon	1363284	1363368	.	+	.	gene_id "ENSMODG00000012274"; transcript_id "mdCircRNA-325"; exon_number "3" gene_name "C4orf29"; gene_biotype "protein_coding"; oId "ce:circC4orf29-2383-001"; tissue "ce";
5	ncSplice	exon	1364225	1364252	.	+	.	gene_id "ENSMODG00000012274"; transcript_id "mdCircRNA-325"; exon_number "4" gene_name "C4orf29"; gene_biotype "protein_coding"; oId "ce:circC4orf29-2383-001"; tissue "ce";
5	ncSplice	exon	1365487	1365625	.	+	.	gene_id "ENSMODG00000012274"; transcript_id "mdCircRNA-325"; exon_number "5" gene_name "C4orf29"; gene_biotype "protein_coding"; oId "ce:circC4orf29-2383-001"; tissue "ce";
5	ncSplice	exon	1370263	1370352	.	+	.	gene_id "ENSMODG00000012274"; transcript_id "mdCircRNA-325"; exon_number "6" gene_name "C4orf29"; gene_biotype "protein_coding"; oId "ce:circC4orf29-2383-001"; tissue "ce";
5	ncSplice	exon	1370455	1370556	.	+	.	gene_id "ENSMODG00000012274"; transcript_id "mdCircRNA-325"; exon_number "7" gene_name "C4orf29"; gene_biotype "protein_coding"; oId "ce:circC4orf29-2383-001"; tissue "ce";
5	ncSplice	gene	136830432	136832870	.	+	.	gene_id "ENSMODG00000000308"; gene_name "INPP4B"; gene_source "ncSplice"; gene_biotype "protein_coding";
5	ncSplice	transcript	136830432	136832870	.	+	.	gene_id "ENSMODG00000000308"; transcript_id "mdCircRNA-326"; gene_name "INPP4B"; gene_biotype "protein_coding"; transcript_biotype "circRNA"; oId "ce:circINPP4B-2385-001"; tissue "ce";
5	ncSplice	exon	136830432	136830550	.	+	.	gene_id "ENSMODG00000000308"; transcript_id "mdCircRNA-326"; exon_number "1" gene_name "INPP4B"; gene_biotype "protein_coding"; oId "ce:circINPP4B-2385-001"; tissue "ce";
5	ncSplice	exon	136832754	136832870	.	+	.	gene_id "ENSMODG00000000308"; transcript_id "mdCircRNA-326"; exon_number "2" gene_name "INPP4B"; gene_biotype "protein_coding"; oId "ce:circINPP4B-2385-001"; tissue "ce";
5	ncSplice	gene	1459974	1475419	.	+	.	gene_id "ENSMODG00000012300"; gene_name "LARP1B"; gene_source "ncSplice"; gene_biotype "protein_coding";
5	ncSplice	transcript	1459974	1475419	.	+	.	gene_id "ENSMODG00000012300"; transcript_id "mdCircRNA-327"; gene_name "LARP1B"; gene_biotype "protein_coding"; transcript_biotype "circRNA"; oId "ce:circLARP1B-2393-001|ts:circLARP1B-6009-001"; tissue "ce|ts";
5	ncSplice	exon	1459974	1460117	.	+	.	gene_id "ENSMODG00000012300"; transcript_id "mdCircRNA-327"; exon_number "1" gene_name "LARP1B"; gene_biotype "protein_coding"; oId "ce:circLARP1B-2393-001|ts:circLARP1B-6009-001"; tissue "ce|ts";
5	ncSplice	exon	1460358	1460526	.	+	.	gene_id "ENSMODG00000012300"; transcript_id "mdCircRNA-327"; exon_number "2" gene_name "LARP1B"; gene_biotype "protein_coding"; oId "ce:circLARP1B-2393-001|ts:circLARP1B-6009-001"; tissue "ce|ts";
5	ncSplice	exon	1464247	1464391	.	+	.	gene_id "ENSMODG00000012300"; transcript_id "mdCircRNA-327"; exon_number "3" gene_name "LARP1B"; gene_biotype "protein_coding"; oId "ce:circLARP1B-2393-001|ts:circLARP1B-6009-001"; tissue "ce|ts";
5	ncSplice	exon	1468692	1468866	.	+	.	gene_id "ENSMODG00000012300"; transcript_id "mdCircRNA-327"; exon_number "4" gene_name "LARP1B"; gene_biotype "protein_coding"; oId "ce:circLARP1B-2393-001|ts:circLARP1B-6009-001"; tissue "ce|ts";
5	ncSplice	exon	1475247	1475419	.	+	.	gene_id "ENSMODG00000012300"; transcript_id "mdCircRNA-327"; exon_number "5" gene_name "LARP1B"; gene_biotype "protein_coding"; oId "ce:circLARP1B-2393-001|ts:circLARP1B-6009-001"; tissue "ce|ts";
5	ncSplice	gene	1486903	1496891	.	+	.	gene_id "ENSMODG00000012300"; gene_name "LARP1B"; gene_source "ncSplice"; gene_biotype "protein_coding";
5	ncSplice	transcript	1486903	1496891	.	+	.	gene_id "ENSMODG00000012300"; transcript_id "mdCircRNA-328"; gene_name "LARP1B"; gene_biotype "protein_coding"; transcript_biotype "circRNA"; oId "ce:circLARP1B-2395-001"; tissue "ce";
5	ncSplice	exon	1486903	1487271	.	+	.	gene_id "ENSMODG00000012300"; transcript_id "mdCircRNA-328"; exon_number "1" gene_name "LARP1B"; gene_biotype "protein_coding"; oId "ce:circLARP1B-2395-001"; tissue "ce";
5	ncSplice	exon	1492817	1495175	.	+	.	gene_id "ENSMODG00000012300"; transcript_id "mdCircRNA-328"; exon_number "2" gene_name "LARP1B"; gene_biotype "protein_coding"; oId "ce:circLARP1B-2395-001"; tissue "ce";
5	ncSplice	exon	1496785	1496891	.	+	.	gene_id "ENSMODG00000012300"; transcript_id "mdCircRNA-328"; exon_number "3" gene_name "LARP1B"; gene_biotype "protein_coding"; oId "ce:circLARP1B-2395-001"; tissue "ce";
5	ncSplice	gene	15286998	15288943	.	-	.	gene_id "ENSMODG00000019039"; gene_name "PCM1"; gene_source "ncSplice"; gene_biotype "protein_coding";
5	ncSplice	transcript	15286998	15288943	.	-	.	gene_id "ENSMODG00000019039"; transcript_id "mdCircRNA-329"; gene_name "PCM1"; gene_biotype "protein_coding"; transcript_biotype "circRNA"; oId "ce:circPCM1-2396-001"; tissue "ce";
5	ncSplice	exon	15286998	15287383	.	-	.	gene_id "ENSMODG00000019039"; transcript_id "mdCircRNA-329"; exon_number "1" gene_name "PCM1"; gene_biotype "protein_coding"; oId "ce:circPCM1-2396-001"; tissue "ce";
5	ncSplice	exon	15288772	15288943	.	-	.	gene_id "ENSMODG00000019039"; transcript_id "mdCircRNA-329"; exon_number "2" gene_name "PCM1"; gene_biotype "protein_coding"; oId "ce:circPCM1-2396-001"; tissue "ce";
5	ncSplice	gene	153955135	153973801	.	+	.	gene_id "ENSMODG00000020760"; gene_name "SCLT1"; gene_source "ncSplice"; gene_biotype "protein_coding";
5	ncSplice	transcript	153955135	153973801	.	+	.	gene_id "ENSMODG00000020760"; transcript_id "mdCircRNA-330"; gene_name "SCLT1"; gene_biotype "protein_coding"; transcript_biotype "circRNA"; oId "ce:circSCLT1-2399-001|ts:circSCLT1-6016-001"; tissue "ce|ts";
5	ncSplice	exon	153955135	153955225	.	+	.	gene_id "ENSMODG00000020760"; transcript_id "mdCircRNA-330"; exon_number "1" gene_name "SCLT1"; gene_biotype "protein_coding"; oId "ce:circSCLT1-2399-001|ts:circSCLT1-6016-001"; tissue "ce|ts";
5	ncSplice	exon	153956658	153956749	.	+	.	gene_id "ENSMODG00000020760"; transcript_id "mdCircRNA-330"; exon_number "2" gene_name "SCLT1"; gene_biotype "protein_coding"; oId "ce:circSCLT1-2399-001|ts:circSCLT1-6016-001"; tissue "ce|ts";
5	ncSplice	exon	153967247	153967424	.	+	.	gene_id "ENSMODG00000020760"; transcript_id "mdCircRNA-330"; exon_number "3" gene_name "SCLT1"; gene_biotype "protein_coding"; oId "ce:circSCLT1-2399-001|ts:circSCLT1-6016-001"; tissue "ce|ts";
5	ncSplice	exon	153973703	153973801	.	+	.	gene_id "ENSMODG00000020760"; transcript_id "mdCircRNA-330"; exon_number "4" gene_name "SCLT1"; gene_biotype "protein_coding"; oId "ce:circSCLT1-2399-001|ts:circSCLT1-6016-001"; tissue "ce|ts";
5	ncSplice	gene	153984304	154016141	.	+	.	gene_id "ENSMODG00000020760"; gene_name "SCLT1"; gene_source "ncSplice"; gene_biotype "protein_coding";
5	ncSplice	transcript	153984304	154016141	.	+	.	gene_id "ENSMODG00000020760"; transcript_id "mdCircRNA-331"; gene_name "SCLT1"; gene_biotype "protein_coding"; transcript_biotype "circRNA"; oId "ce:circSCLT1-2401-001"; tissue "ce";
5	ncSplice	exon	153984304	153998589	.	+	.	gene_id "ENSMODG00000020760"; transcript_id "mdCircRNA-331"; exon_number "1" gene_name "SCLT1"; gene_biotype "protein_coding"; oId "ce:circSCLT1-2401-001"; tissue "ce";
5	ncSplice	exon	154002409	154002554	.	+	.	gene_id "ENSMODG00000020760"; transcript_id "mdCircRNA-331"; exon_number "2" gene_name "SCLT1"; gene_biotype "protein_coding"; oId "ce:circSCLT1-2401-001"; tissue "ce";
5	ncSplice	exon	154012621	154012813	.	+	.	gene_id "ENSMODG00000020760"; transcript_id "mdCircRNA-331"; exon_number "3" gene_name "SCLT1"; gene_biotype "protein_coding"; oId "ce:circSCLT1-2401-001"; tissue "ce";
5	ncSplice	exon	154015945	154016141	.	+	.	gene_id "ENSMODG00000020760"; transcript_id "mdCircRNA-331"; exon_number "4" gene_name "SCLT1"; gene_biotype "protein_coding"; oId "ce:circSCLT1-2401-001"; tissue "ce";
5	ncSplice	gene	173966398	173980719	.	-	.	gene_id "ENSMODG00000020643"; gene_name "DCUN1D4"; gene_source "ncSplice"; gene_biotype "protein_coding";
5	ncSplice	transcript	173966398	173980719	.	-	.	gene_id "ENSMODG00000020643"; transcript_id "mdCircRNA-332"; gene_name "DCUN1D4"; gene_biotype "protein_coding"; transcript_biotype "circRNA"; oId "ce:circDCUN1D4-2414-001|ts:circDCUN1D4-6044-001"; tissue "ce|ts";
5	ncSplice	exon	173966398	173966468	.	-	.	gene_id "ENSMODG00000020643"; transcript_id "mdCircRNA-332"; exon_number "1" gene_name "DCUN1D4"; gene_biotype "protein_coding"; oId "ce:circDCUN1D4-2414-001|ts:circDCUN1D4-6044-001"; tissue "ce|ts";
5	ncSplice	exon	173970953	173971044	.	-	.	gene_id "ENSMODG00000020643"; transcript_id "mdCircRNA-332"; exon_number "2" gene_name "DCUN1D4"; gene_biotype "protein_coding"; oId "ce:circDCUN1D4-2414-001|ts:circDCUN1D4-6044-001"; tissue "ce|ts";
5	ncSplice	exon	173980605	173980719	.	-	.	gene_id "ENSMODG00000020643"; transcript_id "mdCircRNA-332"; exon_number "3" gene_name "DCUN1D4"; gene_biotype "protein_coding"; oId "ce:circDCUN1D4-2414-001|ts:circDCUN1D4-6044-001"; tissue "ce|ts";
5	ncSplice	gene	184695521	184733730	.	-	.	gene_id "ENSMODG00000020556"; gene_name "UBE2K"; gene_source "ncSplice"; gene_biotype "protein_coding";
5	ncSplice	transcript	184695521	184733730	.	-	.	gene_id "ENSMODG00000020556"; transcript_id "mdCircRNA-333"; gene_name "UBE2K"; gene_biotype "protein_coding"; transcript_biotype "circRNA"; oId "ce:circUBE2K-2430-001|ts:circUBE2K-6083-001"; tissue "ce|ts";
5	ncSplice	exon	184695521	184695620	.	-	.	gene_id "ENSMODG00000020556"; transcript_id "mdCircRNA-333"; exon_number "1" gene_name "UBE2K"; gene_biotype "protein_coding"; oId "ce:circUBE2K-2430-001|ts:circUBE2K-6083-001"; tissue "ce|ts";
5	ncSplice	exon	184713462	184713544	.	-	.	gene_id "ENSMODG00000020556"; transcript_id "mdCircRNA-333"; exon_number "2" gene_name "UBE2K"; gene_biotype "protein_coding"; oId "ce:circUBE2K-2430-001|ts:circUBE2K-6083-001"; tissue "ce|ts";
5	ncSplice	exon	184728925	184733730	.	-	.	gene_id "ENSMODG00000020556"; transcript_id "mdCircRNA-333"; exon_number "3" gene_name "UBE2K"; gene_biotype "protein_coding"; oId "ce:circUBE2K-2430-001|ts:circUBE2K-6083-001"; tissue "ce|ts";
5	ncSplice	gene	184713462	184733730	.	-	.	gene_id "ENSMODG00000020556"; gene_name "UBE2K"; gene_source "ncSplice"; gene_biotype "protein_coding";
5	ncSplice	transcript	184713462	184733730	.	-	.	gene_id "ENSMODG00000020556"; transcript_id "mdCircRNA-334"; gene_name "UBE2K"; gene_biotype "protein_coding"; transcript_biotype "circRNA"; oId "ce:circUBE2K-2431-001|ts:circUBE2K-6085-001"; tissue "ce|ts";
5	ncSplice	exon	184713462	184713544	.	-	.	gene_id "ENSMODG00000020556"; transcript_id "mdCircRNA-334"; exon_number "1" gene_name "UBE2K"; gene_biotype "protein_coding"; oId "ce:circUBE2K-2431-001|ts:circUBE2K-6085-001"; tissue "ce|ts";
5	ncSplice	exon	184728925	184733730	.	-	.	gene_id "ENSMODG00000020556"; transcript_id "mdCircRNA-334"; exon_number "2" gene_name "UBE2K"; gene_biotype "protein_coding"; oId "ce:circUBE2K-2431-001|ts:circUBE2K-6085-001"; tissue "ce|ts";
5	ncSplice	gene	238428130	238428869	.	+	.	gene_id "ENSMODG00000005400"; gene_name "PTPRA"; gene_source "ncSplice"; gene_biotype "protein_coding";
5	ncSplice	transcript	238428130	238428869	.	+	.	gene_id "ENSMODG00000005400"; transcript_id "mdCircRNA-335"; gene_name "PTPRA"; gene_biotype "protein_coding"; transcript_biotype "circRNA"; oId "ce:circPTPRA-2482-001|ts:circPTPRA-6311-001"; tissue "ce|ts";
5	ncSplice	exon	238428130	238428208	.	+	.	gene_id "ENSMODG00000005400"; transcript_id "mdCircRNA-335"; exon_number "1" gene_name "PTPRA"; gene_biotype "protein_coding"; oId "ce:circPTPRA-2482-001|ts:circPTPRA-6311-001"; tissue "ce|ts";
5	ncSplice	exon	238428492	238428869	.	+	.	gene_id "ENSMODG00000005400"; transcript_id "mdCircRNA-335"; exon_number "2" gene_name "PTPRA"; gene_biotype "protein_coding"; oId "ce:circPTPRA-2482-001|ts:circPTPRA-6311-001"; tissue "ce|ts";
5	ncSplice	gene	238802364	238816705	.	-	.	gene_id "ENSMODG00000005523"; gene_name "C20orf194"; gene_source "ncSplice"; gene_biotype "protein_coding";
5	ncSplice	transcript	238802364	238816705	.	-	.	gene_id "ENSMODG00000005523"; transcript_id "mdCircRNA-336"; gene_name "C20orf194"; gene_biotype "protein_coding"; transcript_biotype "circRNA"; oId "ce:circC20orf194-2484-001"; tissue "ce";
5	ncSplice	exon	238802364	238802467	.	-	.	gene_id "ENSMODG00000005523"; transcript_id "mdCircRNA-336"; exon_number "1" gene_name "C20orf194"; gene_biotype "protein_coding"; oId "ce:circC20orf194-2484-001"; tissue "ce";
5	ncSplice	exon	238809494	238809581	.	-	.	gene_id "ENSMODG00000005523"; transcript_id "mdCircRNA-336"; exon_number "2" gene_name "C20orf194"; gene_biotype "protein_coding"; oId "ce:circC20orf194-2484-001"; tissue "ce";
5	ncSplice	exon	238812095	238812145	.	-	.	gene_id "ENSMODG00000005523"; transcript_id "mdCircRNA-336"; exon_number "3" gene_name "C20orf194"; gene_biotype "protein_coding"; oId "ce:circC20orf194-2484-001"; tissue "ce";
5	ncSplice	exon	238815867	238815937	.	-	.	gene_id "ENSMODG00000005523"; transcript_id "mdCircRNA-336"; exon_number "4" gene_name "C20orf194"; gene_biotype "protein_coding"; oId "ce:circC20orf194-2484-001"; tissue "ce";
5	ncSplice	exon	238816594	238816705	.	-	.	gene_id "ENSMODG00000005523"; transcript_id "mdCircRNA-336"; exon_number "5" gene_name "C20orf194"; gene_biotype "protein_coding"; oId "ce:circC20orf194-2484-001"; tissue "ce";
5	ncSplice	gene	242796104	242801721	.	+	.	gene_id "ENSMODG00000006574"; gene_name "HPS5"; gene_source "ncSplice"; gene_biotype "protein_coding";
5	ncSplice	transcript	242796104	242801721	.	+	.	gene_id "ENSMODG00000006574"; transcript_id "mdCircRNA-337"; gene_name "HPS5"; gene_biotype "protein_coding"; transcript_biotype "circRNA"; oId "ce:circHPS5-2487-001|ts:circHPS5-6340-001"; tissue "ce|ts";
5	ncSplice	exon	242796104	242796224	.	+	.	gene_id "ENSMODG00000006574"; transcript_id "mdCircRNA-337"; exon_number "1" gene_name "HPS5"; gene_biotype "protein_coding"; oId "ce:circHPS5-2487-001|ts:circHPS5-6340-001"; tissue "ce|ts";
5	ncSplice	exon	242797420	242797575	.	+	.	gene_id "ENSMODG00000006574"; transcript_id "mdCircRNA-337"; exon_number "2" gene_name "HPS5"; gene_biotype "protein_coding"; oId "ce:circHPS5-2487-001|ts:circHPS5-6340-001"; tissue "ce|ts";
5	ncSplice	exon	242800539	242800658	.	+	.	gene_id "ENSMODG00000006574"; transcript_id "mdCircRNA-337"; exon_number "3" gene_name "HPS5"; gene_biotype "protein_coding"; oId "ce:circHPS5-2487-001|ts:circHPS5-6340-001"; tissue "ce|ts";
5	ncSplice	exon	242801608	242801721	.	+	.	gene_id "ENSMODG00000006574"; transcript_id "mdCircRNA-337"; exon_number "4" gene_name "HPS5"; gene_biotype "protein_coding"; oId "ce:circHPS5-2487-001|ts:circHPS5-6340-001"; tissue "ce|ts";
5	ncSplice	gene	283143286	283163332	.	-	.	gene_id "ENSMODG00000019887"; gene_name "PHF21A"; gene_source "ncSplice"; gene_biotype "protein_coding";
5	ncSplice	transcript	283143286	283163332	.	-	.	gene_id "ENSMODG00000019887"; transcript_id "mdCircRNA-338"; gene_name "PHF21A"; gene_biotype "protein_coding"; transcript_biotype "circRNA"; oId "ce:circPHF21A-2533-001"; tissue "ce";
[truncated: 6,201 more rows]
