# Supplementary material for: Circular RNA repertoires are associated with evolutionarily young transposable elements
Source: eLife. 2021 Sep 20;10:e67991. doi: 10.7554/eLife.67991 (PMC8516420; doi:10.7554/eLife.67991)
Supplement: Supplementary file 13. — A gtf-file with all circRNA transcripts including the transcript and exon coordinates. [file elife-67991-supp13.gtf]

10	ncSplice	gene	89473752	89483524	.	-	.	gene_id "ENSMUSG00000047638"; gene_name "Nr1h4"; gene_source "ncSplice"; gene_biotype "protein_coding";
10	ncSplice	transcript	89473752	89483524	.	-	.	gene_id "ENSMUSG00000047638"; transcript_id "mmCircRNA-1"; gene_name "Nr1h4"; gene_biotype "protein_coding"; transcript_biotype "circRNA"; oId "lv:circNr1h4-68-001"; tissue "lv";
10	ncSplice	exon	89473752	89473898	.	-	.	gene_id "ENSMUSG00000047638"; transcript_id "mmCircRNA-1"; exon_number "1" gene_name "Nr1h4"; gene_biotype "protein_coding"; oId "lv:circNr1h4-68-001"; tissue "lv";
10	ncSplice	exon	89478350	89478449	.	-	.	gene_id "ENSMUSG00000047638"; transcript_id "mmCircRNA-1"; exon_number "2" gene_name "Nr1h4"; gene_biotype "protein_coding"; oId "lv:circNr1h4-68-001"; tissue "lv";
10	ncSplice	exon	89478778	89478876	.	-	.	gene_id "ENSMUSG00000047638"; transcript_id "mmCircRNA-1"; exon_number "3" gene_name "Nr1h4"; gene_biotype "protein_coding"; oId "lv:circNr1h4-68-001"; tissue "lv";
10	ncSplice	exon	89480491	89480627	.	-	.	gene_id "ENSMUSG00000047638"; transcript_id "mmCircRNA-1"; exon_number "4" gene_name "Nr1h4"; gene_biotype "protein_coding"; oId "lv:circNr1h4-68-001"; tissue "lv";
10	ncSplice	exon	89483384	89483524	.	-	.	gene_id "ENSMUSG00000047638"; transcript_id "mmCircRNA-1"; exon_number "5" gene_name "Nr1h4"; gene_biotype "protein_coding"; oId "lv:circNr1h4-68-001"; tissue "lv";
11	ncSplice	gene	70874746	70884968	.	+	.	gene_id "ENSMUSG00000020817"; gene_name "Rabep1"; gene_source "ncSplice"; gene_biotype "protein_coding";
11	ncSplice	transcript	70874746	70884968	.	+	.	gene_id "ENSMUSG00000020817"; transcript_id "mmCircRNA-2"; gene_name "Rabep1"; gene_biotype "protein_coding"; transcript_biotype "circRNA"; oId "lv:circRabep1-164-001|ce:circRabep1-658-001"; tissue "lv|ce";
11	ncSplice	exon	70874746	70874874	.	+	.	gene_id "ENSMUSG00000020817"; transcript_id "mmCircRNA-2"; exon_number "1" gene_name "Rabep1"; gene_biotype "protein_coding"; oId "lv:circRabep1-164-001|ce:circRabep1-658-001"; tissue "lv|ce";
11	ncSplice	exon	70884765	70884968	.	+	.	gene_id "ENSMUSG00000020817"; transcript_id "mmCircRNA-2"; exon_number "2" gene_name "Rabep1"; gene_biotype "protein_coding"; oId "lv:circRabep1-164-001|ce:circRabep1-658-001"; tissue "lv|ce";
11	ncSplice	gene	70874746	70887171	.	+	.	gene_id "ENSMUSG00000020817"; gene_name "Rabep1"; gene_source "ncSplice"; gene_biotype "protein_coding";
11	ncSplice	transcript	70874746	70887171	.	+	.	gene_id "ENSMUSG00000020817"; transcript_id "mmCircRNA-3"; gene_name "Rabep1"; gene_biotype "protein_coding"; transcript_biotype "circRNA"; oId "lv:circRabep1-165-001|ce:circRabep1-659-001|ts:circRabep1-450-001"; tissue "lv|ce|ts";
11	ncSplice	exon	70874746	70874874	.	+	.	gene_id "ENSMUSG00000020817"; transcript_id "mmCircRNA-3"; exon_number "1" gene_name "Rabep1"; gene_biotype "protein_coding"; oId "lv:circRabep1-165-001|ce:circRabep1-659-001|ts:circRabep1-450-001"; tissue "lv|ce|ts";
11	ncSplice	exon	70884765	70884968	.	+	.	gene_id "ENSMUSG00000020817"; transcript_id "mmCircRNA-3"; exon_number "2" gene_name "Rabep1"; gene_biotype "protein_coding"; oId "lv:circRabep1-165-001|ce:circRabep1-659-001|ts:circRabep1-450-001"; tissue "lv|ce|ts";
11	ncSplice	exon	70887011	70887171	.	+	.	gene_id "ENSMUSG00000020817"; transcript_id "mmCircRNA-3"; exon_number "3" gene_name "Rabep1"; gene_biotype "protein_coding"; oId "lv:circRabep1-165-001|ce:circRabep1-659-001|ts:circRabep1-450-001"; tissue "lv|ce|ts";
1	ncSplice	gene	178323134	178325313	.	-	.	gene_id "ENSMUSG00000039630"; gene_name "Hnrnpu"; gene_source "ncSplice"; gene_biotype "protein_coding";
1	ncSplice	transcript	178323134	178325313	.	-	.	gene_id "ENSMUSG00000039630"; transcript_id "mmCircRNA-4"; gene_name "Hnrnpu"; gene_biotype "protein_coding"; transcript_biotype "circRNA"; oId "lv:circHnrnpu-186-002"; tissue "lv";
1	ncSplice	exon	178323134	178323195	.	-	.	gene_id "ENSMUSG00000039630"; transcript_id "mmCircRNA-4"; exon_number "1" gene_name "Hnrnpu"; gene_biotype "protein_coding"; oId "lv:circHnrnpu-186-002"; tissue "lv";
1	ncSplice	exon	178323620	178323713	.	-	.	gene_id "ENSMUSG00000039630"; transcript_id "mmCircRNA-4"; exon_number "2" gene_name "Hnrnpu"; gene_biotype "protein_coding"; oId "lv:circHnrnpu-186-002"; tissue "lv";
1	ncSplice	exon	178323966	178324064	.	-	.	gene_id "ENSMUSG00000039630"; transcript_id "mmCircRNA-4"; exon_number "3" gene_name "Hnrnpu"; gene_biotype "protein_coding"; oId "lv:circHnrnpu-186-002"; tissue "lv";
1	ncSplice	exon	178325243	178325313	.	-	.	gene_id "ENSMUSG00000039630"; transcript_id "mmCircRNA-4"; exon_number "4" gene_name "Hnrnpu"; gene_biotype "protein_coding"; oId "lv:circHnrnpu-186-002"; tissue "lv";
11	ncSplice	gene	84193079	84195687	.	+	.	gene_id "ENSMUSG00000020532"; gene_name "Acaca"; gene_source "ncSplice"; gene_biotype "protein_coding";
11	ncSplice	transcript	84193079	84195687	.	+	.	gene_id "ENSMUSG00000020532"; transcript_id "mmCircRNA-5"; gene_name "Acaca"; gene_biotype "protein_coding"; transcript_biotype "circRNA"; oId "lv:circAcaca-194-001|ce:circAcaca-790-001|ts:circAcaca-514-001"; tissue "lv|ce|ts";
11	ncSplice	exon	84193079	84193125	.	+	.	gene_id "ENSMUSG00000020532"; transcript_id "mmCircRNA-5"; exon_number "1" gene_name "Acaca"; gene_biotype "protein_coding"; oId "lv:circAcaca-194-001|ce:circAcaca-790-001|ts:circAcaca-514-001"; tissue "lv|ce|ts";
11	ncSplice	exon	84195438	84195687	.	+	.	gene_id "ENSMUSG00000020532"; transcript_id "mmCircRNA-5"; exon_number "2" gene_name "Acaca"; gene_biotype "protein_coding"; oId "lv:circAcaca-194-001|ce:circAcaca-790-001|ts:circAcaca-514-001"; tissue "lv|ce|ts";
1	ncSplice	gene	190146952	190162313	.	-	.	gene_id "ENSMUSG00000010175"; gene_name "Prox1"; gene_source "ncSplice"; gene_biotype "protein_coding";
1	ncSplice	transcript	190146952	190162313	.	-	.	gene_id "ENSMUSG00000010175"; transcript_id "mmCircRNA-6"; gene_name "Prox1"; gene_biotype "protein_coding"; transcript_biotype "circRNA"; oId "lv:circProx1-215-001"; tissue "lv";
1	ncSplice	exon	190146952	190147146	.	-	.	gene_id "ENSMUSG00000010175"; transcript_id "mmCircRNA-6"; exon_number "1" gene_name "Prox1"; gene_biotype "protein_coding"; oId "lv:circProx1-215-001"; tissue "lv";
1	ncSplice	exon	190153416	190153523	.	-	.	gene_id "ENSMUSG00000010175"; transcript_id "mmCircRNA-6"; exon_number "2" gene_name "Prox1"; gene_biotype "protein_coding"; oId "lv:circProx1-215-001"; tissue "lv";
1	ncSplice	exon	190160522	190162059	.	-	.	gene_id "ENSMUSG00000010175"; transcript_id "mmCircRNA-6"; exon_number "3" gene_name "Prox1"; gene_biotype "protein_coding"; oId "lv:circProx1-215-001"; tissue "lv";
1	ncSplice	exon	190162169	190162313	.	-	.	gene_id "ENSMUSG00000010175"; transcript_id "mmCircRNA-6"; exon_number "4" gene_name "Prox1"; gene_biotype "protein_coding"; oId "lv:circProx1-215-001"; tissue "lv";
12	ncSplice	gene	103729901	103819531	.	-	.	gene_id "ENSMUSG00000071177"; gene_name "Serpina1d"; gene_source "ncSplice"; gene_biotype "protein_coding";
12	ncSplice	transcript	103729901	103819531	.	-	.	gene_id "ENSMUSG00000071177"; transcript_id "mmCircRNA-7"; gene_name "Serpina1d"; gene_biotype "protein_coding"; transcript_biotype "circRNA"; oId "lv:circSerpina1d-232-001"; tissue "lv";
12	ncSplice	exon	103729901	103732592	.	-	.	gene_id "ENSMUSG00000071177"; transcript_id "mmCircRNA-7"; exon_number "1" gene_name "Serpina1d"; gene_biotype "protein_coding"; oId "lv:circSerpina1d-232-001"; tissue "lv";
12	ncSplice	exon	103735171	103765970	.	-	.	gene_id "ENSMUSG00000071177"; transcript_id "mmCircRNA-7"; exon_number "2" gene_name "Serpina1d"; gene_biotype "protein_coding"; oId "lv:circSerpina1d-232-001"; tissue "lv";
12	ncSplice	exon	103767416	103768966	.	-	.	gene_id "ENSMUSG00000071177"; transcript_id "mmCircRNA-7"; exon_number "3" gene_name "Serpina1d"; gene_biotype "protein_coding"; oId "lv:circSerpina1d-232-001"; tissue "lv";
12	ncSplice	exon	103773531	103819531	.	-	.	gene_id "ENSMUSG00000071177"; transcript_id "mmCircRNA-7"; exon_number "4" gene_name "Serpina1d"; gene_biotype "protein_coding"; oId "lv:circSerpina1d-232-001"; tissue "lv";
12	ncSplice	gene	103819536	103896687	.	-	.	gene_id "ENSMUSG00000066366"; gene_name "Serpina1a"; gene_source "ncSplice"; gene_biotype "protein_coding";
12	ncSplice	transcript	103819536	103896687	.	-	.	gene_id "ENSMUSG00000066366"; transcript_id "mmCircRNA-8"; gene_name "Serpina1a"; gene_biotype "protein_coding"; transcript_biotype "circRNA"; oId "lv:circSerpina1a-233-001"; tissue "lv";
12	ncSplice	exon	103819536	103855058	.	-	.	gene_id "ENSMUSG00000066366"; transcript_id "mmCircRNA-8"; exon_number "1" gene_name "Serpina1a"; gene_biotype "protein_coding"; oId "lv:circSerpina1a-233-001"; tissue "lv";
12	ncSplice	exon	103896396	103896687	.	-	.	gene_id "ENSMUSG00000066366"; transcript_id "mmCircRNA-8"; exon_number "2" gene_name "Serpina1a"; gene_biotype "protein_coding"; oId "lv:circSerpina1a-233-001"; tissue "lv";
12	ncSplice	gene	103896692	103948694	.	-	.	gene_id "ENSMUSG00000072849"; gene_name "Serpina1e"; gene_source "ncSplice"; gene_biotype "protein_coding";
12	ncSplice	transcript	103896692	103948694	.	-	.	gene_id "ENSMUSG00000072849"; transcript_id "mmCircRNA-9"; gene_name "Serpina1e"; gene_biotype "protein_coding"; transcript_biotype "circRNA"; oId "lv:circSerpina1e-236-001"; tissue "lv";
12	ncSplice	exon	103896692	103900329	.	-	.	gene_id "ENSMUSG00000072849"; transcript_id "mmCircRNA-9"; exon_number "1" gene_name "Serpina1e"; gene_biotype "protein_coding"; oId "lv:circSerpina1e-236-001"; tissue "lv";
12	ncSplice	exon	103904859	103948694	.	-	.	gene_id "ENSMUSG00000072849"; transcript_id "mmCircRNA-9"; exon_number "2" gene_name "Serpina1e"; gene_biotype "protein_coding"; oId "lv:circSerpina1e-236-001"; tissue "lv";
12	ncSplice	gene	3442474	3457209	.	+	.	gene_id "ENSMUSG00000037486"; gene_name "Asxl2"; gene_source "ncSplice"; gene_biotype "protein_coding";
12	ncSplice	transcript	3442474	3457209	.	+	.	gene_id "ENSMUSG00000037486"; transcript_id "mmCircRNA-10"; gene_name "Asxl2"; gene_biotype "protein_coding"; transcript_biotype "circRNA"; oId "lv:circAsxl2-253-002"; tissue "lv";
12	ncSplice	exon	3442474	3442556	.	+	.	gene_id "ENSMUSG00000037486"; transcript_id "mmCircRNA-10"; exon_number "1" gene_name "Asxl2"; gene_biotype "protein_coding"; oId "lv:circAsxl2-253-002"; tissue "lv";
12	ncSplice	exon	3445452	3445454	.	+	.	gene_id "ENSMUSG00000037486"; transcript_id "mmCircRNA-10"; exon_number "2" gene_name "Asxl2"; gene_biotype "protein_coding"; oId "lv:circAsxl2-253-002"; tissue "lv";
12	ncSplice	exon	3451662	3451770	.	+	.	gene_id "ENSMUSG00000037486"; transcript_id "mmCircRNA-10"; exon_number "3" gene_name "Asxl2"; gene_biotype "protein_coding"; oId "lv:circAsxl2-253-002"; tissue "lv";
12	ncSplice	exon	3457062	3457209	.	+	.	gene_id "ENSMUSG00000037486"; transcript_id "mmCircRNA-10"; exon_number "4" gene_name "Asxl2"; gene_biotype "protein_coding"; oId "lv:circAsxl2-253-002"; tissue "lv";
12	ncSplice	gene	3617606	3648389	.	+	.	gene_id "ENSMUSG00000071454"; gene_name "Dtnb"; gene_source "ncSplice"; gene_biotype "protein_coding";
12	ncSplice	transcript	3617606	3648389	.	+	.	gene_id "ENSMUSG00000071454"; transcript_id "mmCircRNA-11"; gene_name "Dtnb"; gene_biotype "protein_coding"; transcript_biotype "circRNA"; oId "lv:circDtnb-260-002|ce:circDtnb-1003-001|ts:circDtnb-703-001"; tissue "lv|ce|ts";
12	ncSplice	exon	3617606	3617691	.	+	.	gene_id "ENSMUSG00000071454"; transcript_id "mmCircRNA-11"; exon_number "1" gene_name "Dtnb"; gene_biotype "protein_coding"; oId "lv:circDtnb-260-002|ce:circDtnb-1003-001|ts:circDtnb-703-001"; tissue "lv|ce|ts";
12	ncSplice	exon	3632810	3632964	.	+	.	gene_id "ENSMUSG00000071454"; transcript_id "mmCircRNA-11"; exon_number "2" gene_name "Dtnb"; gene_biotype "protein_coding"; oId "lv:circDtnb-260-002|ce:circDtnb-1003-001|ts:circDtnb-703-001"; tissue "lv|ce|ts";
12	ncSplice	exon	3643917	3644022	.	+	.	gene_id "ENSMUSG00000071454"; transcript_id "mmCircRNA-11"; exon_number "3" gene_name "Dtnb"; gene_biotype "protein_coding"; oId "lv:circDtnb-260-002|ce:circDtnb-1003-001|ts:circDtnb-703-001"; tissue "lv|ce|ts";
12	ncSplice	exon	3648223	3648389	.	+	.	gene_id "ENSMUSG00000071454"; transcript_id "mmCircRNA-11"; exon_number "4" gene_name "Dtnb"; gene_biotype "protein_coding"; oId "lv:circDtnb-260-002|ce:circDtnb-1003-001|ts:circDtnb-703-001"; tissue "lv|ce|ts";
12	ncSplice	gene	51759219	51761170	.	-	.	gene_id "ENSMUSG00000035247"; gene_name "Hectd1"; gene_source "ncSplice"; gene_biotype "protein_coding";
12	ncSplice	transcript	51759219	51761170	.	-	.	gene_id "ENSMUSG00000035247"; transcript_id "mmCircRNA-12"; gene_name "Hectd1"; gene_biotype "protein_coding"; transcript_biotype "circRNA"; oId "lv:circHectd1-273-001"; tissue "lv";
12	ncSplice	exon	51759219	51759441	.	-	.	gene_id "ENSMUSG00000035247"; transcript_id "mmCircRNA-12"; exon_number "1" gene_name "Hectd1"; gene_biotype "protein_coding"; oId "lv:circHectd1-273-001"; tissue "lv";
12	ncSplice	exon	51761014	51761170	.	-	.	gene_id "ENSMUSG00000035247"; transcript_id "mmCircRNA-12"; exon_number "2" gene_name "Hectd1"; gene_biotype "protein_coding"; oId "lv:circHectd1-273-001"; tissue "lv";
12	ncSplice	gene	69159373	69159565	.	+	.	gene_id "ENSMUSG00000099021"; gene_name "Gm22405"; gene_source "ncSplice"; gene_biotype "misc_RNA";
12	ncSplice	transcript	69159373	69159565	.	+	.	gene_id "ENSMUSG00000099021"; transcript_id "mmCircRNA-13"; gene_name "Gm22405"; gene_biotype "misc_RNA"; transcript_biotype "circRNA"; oId "lv:circGm22405-282-001"; tissue "lv";
12	ncSplice	exon	69159373	69159400	.	+	.	gene_id "ENSMUSG00000099021"; transcript_id "mmCircRNA-13"; exon_number "1" gene_name "Gm22405"; gene_biotype "misc_RNA"; oId "lv:circGm22405-282-001"; tissue "lv";
12	ncSplice	exon	69159459	69159565	.	+	.	gene_id "ENSMUSG00000099021"; transcript_id "mmCircRNA-13"; exon_number "2" gene_name "Gm22405"; gene_biotype "misc_RNA"; oId "lv:circGm22405-282-001"; tissue "lv";
12	ncSplice	gene	69159388	69159591	.	+	.	gene_id "ENSMUSG00000099021"; gene_name "Gm22405"; gene_source "ncSplice"; gene_biotype "misc_RNA";
12	ncSplice	transcript	69159388	69159591	.	+	.	gene_id "ENSMUSG00000099021"; transcript_id "mmCircRNA-14"; gene_name "Gm22405"; gene_biotype "misc_RNA"; transcript_biotype "circRNA"; oId "lv:circGm22405-283-001"; tissue "lv";
12	ncSplice	exon	69159388	69159400	.	+	.	gene_id "ENSMUSG00000099021"; transcript_id "mmCircRNA-14"; exon_number "1" gene_name "Gm22405"; gene_biotype "misc_RNA"; oId "lv:circGm22405-283-001"; tissue "lv";
12	ncSplice	exon	69159459	69159591	.	+	.	gene_id "ENSMUSG00000099021"; transcript_id "mmCircRNA-14"; exon_number "2" gene_name "Gm22405"; gene_biotype "misc_RNA"; oId "lv:circGm22405-283-001"; tissue "lv";
12	ncSplice	gene	69361185	69361388	.	-	.	gene_id "ENSMUSG00000099250"; gene_name "Gm26191"; gene_source "ncSplice"; gene_biotype "misc_RNA";
12	ncSplice	transcript	69361185	69361388	.	-	.	gene_id "ENSMUSG00000099250"; transcript_id "mmCircRNA-15"; gene_name "Gm26191"; gene_biotype "misc_RNA"; transcript_biotype "circRNA"; oId "lv:circGm26191-288-001"; tissue "lv";
12	ncSplice	exon	69361185	69361304	.	-	.	gene_id "ENSMUSG00000099250"; transcript_id "mmCircRNA-15"; exon_number "1" gene_name "Gm26191"; gene_biotype "misc_RNA"; oId "lv:circGm26191-288-001"; tissue "lv";
12	ncSplice	exon	69361370	69361388	.	-	.	gene_id "ENSMUSG00000099250"; transcript_id "mmCircRNA-15"; exon_number "2" gene_name "Gm26191"; gene_biotype "misc_RNA"; oId "lv:circGm26191-288-001"; tissue "lv";
12	ncSplice	gene	69361211	69361403	.	-	.	gene_id "ENSMUSG00000099250"; gene_name "Gm26191"; gene_source "ncSplice"; gene_biotype "misc_RNA";
12	ncSplice	transcript	69361211	69361403	.	-	.	gene_id "ENSMUSG00000099250"; transcript_id "mmCircRNA-16"; gene_name "Gm26191"; gene_biotype "misc_RNA"; transcript_biotype "circRNA"; oId "lv:circGm26191-289-001"; tissue "lv";
12	ncSplice	exon	69361211	69361304	.	-	.	gene_id "ENSMUSG00000099250"; transcript_id "mmCircRNA-16"; exon_number "1" gene_name "Gm26191"; gene_biotype "misc_RNA"; oId "lv:circGm26191-289-001"; tissue "lv";
12	ncSplice	exon	69361370	69361403	.	-	.	gene_id "ENSMUSG00000099250"; transcript_id "mmCircRNA-16"; exon_number "2" gene_name "Gm26191"; gene_biotype "misc_RNA"; oId "lv:circGm26191-289-001"; tissue "lv";
13	ncSplice	gene	103884143	103889285	.	-	.	gene_id "ENSMUSG00000021709"; gene_name "Erbb2ip"; gene_source "ncSplice"; gene_biotype "protein_coding";
13	ncSplice	transcript	103884143	103889285	.	-	.	gene_id "ENSMUSG00000021709"; transcript_id "mmCircRNA-17"; gene_name "Erbb2ip"; gene_biotype "protein_coding"; transcript_biotype "circRNA"; oId "lv:circErbb2ip-326-002|ce:circErbb2ip-1201-001|ts:circErbb2ip-886-004"; tissue "lv|ce|ts";
13	ncSplice	exon	103884143	103884260	.	-	.	gene_id "ENSMUSG00000021709"; transcript_id "mmCircRNA-17"; exon_number "1" gene_name "Erbb2ip"; gene_biotype "protein_coding"; oId "lv:circErbb2ip-326-002|ce:circErbb2ip-1201-001|ts:circErbb2ip-886-004"; tissue "lv|ce|ts";
13	ncSplice	exon	103886141	103886338	.	-	.	gene_id "ENSMUSG00000021709"; transcript_id "mmCircRNA-17"; exon_number "2" gene_name "Erbb2ip"; gene_biotype "protein_coding"; oId "lv:circErbb2ip-326-002|ce:circErbb2ip-1201-001|ts:circErbb2ip-886-004"; tissue "lv|ce|ts";
13	ncSplice	exon	103889238	103889285	.	-	.	gene_id "ENSMUSG00000021709"; transcript_id "mmCircRNA-17"; exon_number "3" gene_name "Erbb2ip"; gene_biotype "protein_coding"; oId "lv:circErbb2ip-326-002|ce:circErbb2ip-1201-001|ts:circErbb2ip-886-004"; tissue "lv|ce|ts";
13	ncSplice	gene	93341756	93356079	.	+	.	gene_id "ENSMUSG00000007617"; gene_name "Homer1"; gene_source "ncSplice"; gene_biotype "protein_coding";
13	ncSplice	transcript	93341756	93356079	.	+	.	gene_id "ENSMUSG00000007617"; transcript_id "mmCircRNA-18"; gene_name "Homer1"; gene_biotype "protein_coding"; transcript_biotype "circRNA"; oId "lv:circHomer1-370-001|ce:circHomer1-1415-001|ts:circHomer1-1094-001"; tissue "lv|ce|ts";
13	ncSplice	exon	93341756	93341912	.	+	.	gene_id "ENSMUSG00000007617"; transcript_id "mmCircRNA-18"; exon_number "1" gene_name "Homer1"; gene_biotype "protein_coding"; oId "lv:circHomer1-370-001|ce:circHomer1-1415-001|ts:circHomer1-1094-001"; tissue "lv|ce|ts";
13	ncSplice	exon	93346569	93346700	.	+	.	gene_id "ENSMUSG00000007617"; transcript_id "mmCircRNA-18"; exon_number "2" gene_name "Homer1"; gene_biotype "protein_coding"; oId "lv:circHomer1-370-001|ce:circHomer1-1415-001|ts:circHomer1-1094-001"; tissue "lv|ce|ts";
13	ncSplice	exon	93349205	93349297	.	+	.	gene_id "ENSMUSG00000007617"; transcript_id "mmCircRNA-18"; exon_number "3" gene_name "Homer1"; gene_biotype "protein_coding"; oId "lv:circHomer1-370-001|ce:circHomer1-1415-001|ts:circHomer1-1094-001"; tissue "lv|ce|ts";
13	ncSplice	exon	93355940	93356079	.	+	.	gene_id "ENSMUSG00000007617"; transcript_id "mmCircRNA-18"; exon_number "4" gene_name "Homer1"; gene_biotype "protein_coding"; oId "lv:circHomer1-370-001|ce:circHomer1-1415-001|ts:circHomer1-1094-001"; tissue "lv|ce|ts";
14	ncSplice	gene	21234833	21240571	.	+	.	gene_id "ENSMUSG00000039197"; gene_name "Adk"; gene_source "ncSplice"; gene_biotype "protein_coding";
14	ncSplice	transcript	21234833	21240571	.	+	.	gene_id "ENSMUSG00000039197"; transcript_id "mmCircRNA-19"; gene_name "Adk"; gene_biotype "protein_coding"; transcript_biotype "circRNA"; oId "lv:circAdk-393-001"; tissue "lv";
14	ncSplice	exon	21234833	21235005	.	+	.	gene_id "ENSMUSG00000039197"; transcript_id "mmCircRNA-19"; exon_number "1" gene_name "Adk"; gene_biotype "protein_coding"; oId "lv:circAdk-393-001"; tissue "lv";
14	ncSplice	exon	21240463	21240571	.	+	.	gene_id "ENSMUSG00000039197"; transcript_id "mmCircRNA-19"; exon_number "2" gene_name "Adk"; gene_biotype "protein_coding"; oId "lv:circAdk-393-001"; tissue "lv";
1	ncSplice	gene	53256629	53282092	.	-	.	gene_id "ENSMUSG00000026098"; gene_name "Pms1"; gene_source "ncSplice"; gene_biotype "protein_coding";
1	ncSplice	transcript	53256629	53282092	.	-	.	gene_id "ENSMUSG00000026098"; transcript_id "mmCircRNA-20"; gene_name "Pms1"; gene_biotype "protein_coding"; transcript_biotype "circRNA"; oId "lv:circPms1-448-002|ce:circPms1-1717-001"; tissue "lv|ce";
1	ncSplice	exon	53256629	53265428	.	-	.	gene_id "ENSMUSG00000026098"; transcript_id "mmCircRNA-20"; exon_number "1" gene_name "Pms1"; gene_biotype "protein_coding"; oId "lv:circPms1-448-002|ce:circPms1-1717-001"; tissue "lv|ce";
1	ncSplice	exon	53267828	53267930	.	-	.	gene_id "ENSMUSG00000026098"; transcript_id "mmCircRNA-20"; exon_number "2" gene_name "Pms1"; gene_biotype "protein_coding"; oId "lv:circPms1-448-002|ce:circPms1-1717-001"; tissue "lv|ce";
1	ncSplice	exon	53275070	53275252	.	-	.	gene_id "ENSMUSG00000026098"; transcript_id "mmCircRNA-20"; exon_number "3" gene_name "Pms1"; gene_biotype "protein_coding"; oId "lv:circPms1-448-002|ce:circPms1-1717-001"; tissue "lv|ce";
1	ncSplice	exon	53281941	53282092	.	-	.	gene_id "ENSMUSG00000026098"; transcript_id "mmCircRNA-20"; exon_number "4" gene_name "Pms1"; gene_biotype "protein_coding"; oId "lv:circPms1-448-002|ce:circPms1-1717-001"; tissue "lv|ce";
15	ncSplice	gene	3457930	3551685	.	-	.	gene_id "ENSMUSG00000055737"; gene_name "Ghr"; gene_source "ncSplice"; gene_biotype "protein_coding";
15	ncSplice	transcript	3457930	3551685	.	-	.	gene_id "ENSMUSG00000055737"; transcript_id "mmCircRNA-21"; gene_name "Ghr"; gene_biotype "protein_coding"; transcript_biotype "circRNA"; oId "lv:circGhr-453-005"; tissue "lv";
15	ncSplice	exon	3457930	3458008	.	-	.	gene_id "ENSMUSG00000055737"; transcript_id "mmCircRNA-21"; exon_number "1" gene_name "Ghr"; gene_biotype "protein_coding"; oId "lv:circGhr-453-005"; tissue "lv";
15	ncSplice	exon	3472857	3544233	.	-	.	gene_id "ENSMUSG00000055737"; transcript_id "mmCircRNA-21"; exon_number "2" gene_name "Ghr"; gene_biotype "protein_coding"; oId "lv:circGhr-453-005"; tissue "lv";
15	ncSplice	exon	3551533	3551685	.	-	.	gene_id "ENSMUSG00000055737"; transcript_id "mmCircRNA-21"; exon_number "3" gene_name "Ghr"; gene_biotype "protein_coding"; oId "lv:circGhr-453-005"; tissue "lv";
15	ncSplice	gene	3544025	3551685	.	-	.	gene_id "ENSMUSG00000055737"; gene_name "Ghr"; gene_source "ncSplice"; gene_biotype "protein_coding";
15	ncSplice	transcript	3544025	3551685	.	-	.	gene_id "ENSMUSG00000055737"; transcript_id "mmCircRNA-22"; gene_name "Ghr"; gene_biotype "protein_coding"; transcript_biotype "circRNA"; oId "lv:circGhr-456-001"; tissue "lv";
15	ncSplice	exon	3544025	3545430	.	-	.	gene_id "ENSMUSG00000055737"; transcript_id "mmCircRNA-22"; exon_number "1" gene_name "Ghr"; gene_biotype "protein_coding"; oId "lv:circGhr-456-001"; tissue "lv";
15	ncSplice	exon	3551533	3551685	.	-	.	gene_id "ENSMUSG00000055737"; transcript_id "mmCircRNA-22"; exon_number "2" gene_name "Ghr"; gene_biotype "protein_coding"; oId "lv:circGhr-456-001"; tissue "lv";
15	ncSplice	gene	82825231	82857284	.	-	.	gene_id "ENSMUSG00000041852"; gene_name "Tcf20"; gene_source "ncSplice"; gene_biotype "protein_coding";
15	ncSplice	transcript	82825231	82857284	.	-	.	gene_id "ENSMUSG00000041852"; transcript_id "mmCircRNA-23"; gene_name "Tcf20"; gene_biotype "protein_coding"; transcript_biotype "circRNA"; oId "lv:circTcf20-483-001"; tissue "lv";
15	ncSplice	exon	82825231	82825324	.	-	.	gene_id "ENSMUSG00000041852"; transcript_id "mmCircRNA-23"; exon_number "1" gene_name "Tcf20"; gene_biotype "protein_coding"; oId "lv:circTcf20-483-001"; tissue "lv";
15	ncSplice	exon	82851513	82857284	.	-	.	gene_id "ENSMUSG00000041852"; transcript_id "mmCircRNA-23"; exon_number "2" gene_name "Tcf20"; gene_biotype "protein_coding"; oId "lv:circTcf20-483-001"; tissue "lv";
16	ncSplice	gene	11116795	11128703	.	-	.	gene_id "ENSMUSG00000022498"; gene_name "Txndc11"; gene_source "ncSplice"; gene_biotype "protein_coding";
16	ncSplice	transcript	11116795	11128703	.	-	.	gene_id "ENSMUSG00000022498"; transcript_id "mmCircRNA-24"; gene_name "Txndc11"; gene_biotype "protein_coding"; transcript_biotype "circRNA"; oId "lv:circTxndc11-502-001|ce:circTxndc11-1938-001"; tissue "lv|ce";
16	ncSplice	exon	11116795	11116924	.	-	.	gene_id "ENSMUSG00000022498"; transcript_id "mmCircRNA-24"; exon_number "1" gene_name "Txndc11"; gene_biotype "protein_coding"; oId "lv:circTxndc11-502-001|ce:circTxndc11-1938-001"; tissue "lv|ce";
16	ncSplice	exon	11122670	11122767	.	-	.	gene_id "ENSMUSG00000022498"; transcript_id "mmCircRNA-24"; exon_number "2" gene_name "Txndc11"; gene_biotype "protein_coding"; oId "lv:circTxndc11-502-001|ce:circTxndc11-1938-001"; tissue "lv|ce";
16	ncSplice	exon	11128487	11128703	.	-	.	gene_id "ENSMUSG00000022498"; transcript_id "mmCircRNA-24"; exon_number "3" gene_name "Txndc11"; gene_biotype "protein_coding"; oId "lv:circTxndc11-502-001|ce:circTxndc11-1938-001"; tissue "lv|ce";
16	ncSplice	gene	32950292	32961744	.	+	.	gene_id "ENSMUSG00000022801"; gene_name "Lrch3"; gene_source "ncSplice"; gene_biotype "protein_coding";
16	ncSplice	transcript	32950292	32961744	.	+	.	gene_id "ENSMUSG00000022801"; transcript_id "mmCircRNA-25"; gene_name "Lrch3"; gene_biotype "protein_coding"; transcript_biotype "circRNA"; oId "lv:circLrch3-518-001|ce:circLrch3-2014-001|ts:circLrch3-1654-001"; tissue "lv|ce|ts";
16	ncSplice	exon	32950292	32950436	.	+	.	gene_id "ENSMUSG00000022801"; transcript_id "mmCircRNA-25"; exon_number "1" gene_name "Lrch3"; gene_biotype "protein_coding"; oId "lv:circLrch3-518-001|ce:circLrch3-2014-001|ts:circLrch3-1654-001"; tissue "lv|ce|ts";
16	ncSplice	exon	32952057	32952183	.	+	.	gene_id "ENSMUSG00000022801"; transcript_id "mmCircRNA-25"; exon_number "2" gene_name "Lrch3"; gene_biotype "protein_coding"; oId "lv:circLrch3-518-001|ce:circLrch3-2014-001|ts:circLrch3-1654-001"; tissue "lv|ce|ts";
16	ncSplice	exon	32955300	32955405	.	+	.	gene_id "ENSMUSG00000022801"; transcript_id "mmCircRNA-25"; exon_number "3" gene_name "Lrch3"; gene_biotype "protein_coding"; oId "lv:circLrch3-518-001|ce:circLrch3-2014-001|ts:circLrch3-1654-001"; tissue "lv|ce|ts";
16	ncSplice	exon	32959395	32959531	.	+	.	gene_id "ENSMUSG00000022801"; transcript_id "mmCircRNA-25"; exon_number "4" gene_name "Lrch3"; gene_biotype "protein_coding"; oId "lv:circLrch3-518-001|ce:circLrch3-2014-001|ts:circLrch3-1654-001"; tissue "lv|ce|ts";
16	ncSplice	exon	32961635	32961744	.	+	.	gene_id "ENSMUSG00000022801"; transcript_id "mmCircRNA-25"; exon_number "5" gene_name "Lrch3"; gene_biotype "protein_coding"; oId "lv:circLrch3-518-001|ce:circLrch3-2014-001|ts:circLrch3-1654-001"; tissue "lv|ce|ts";
16	ncSplice	gene	33421321	33434974	.	+	.	gene_id "ENSMUSG00000022811"; gene_name "Zfp148"; gene_source "ncSplice"; gene_biotype "protein_coding";
16	ncSplice	transcript	33421321	33434974	.	+	.	gene_id "ENSMUSG00000022811"; transcript_id "mmCircRNA-26"; gene_name "Zfp148"; gene_biotype "protein_coding"; transcript_biotype "circRNA"; oId "lv:circZfp148-522-001|ce:circZfp148-2024-001"; tissue "lv|ce";
16	ncSplice	exon	33421321	33421402	.	+	.	gene_id "ENSMUSG00000022811"; transcript_id "mmCircRNA-26"; exon_number "1" gene_name "Zfp148"; gene_biotype "protein_coding"; oId "lv:circZfp148-522-001|ce:circZfp148-2024-001"; tissue "lv|ce";
16	ncSplice	exon	33427194	33427329	.	+	.	gene_id "ENSMUSG00000022811"; transcript_id "mmCircRNA-26"; exon_number "2" gene_name "Zfp148"; gene_biotype "protein_coding"; oId "lv:circZfp148-522-001|ce:circZfp148-2024-001"; tissue "lv|ce";
16	ncSplice	exon	33434626	33434974	.	+	.	gene_id "ENSMUSG00000022811"; transcript_id "mmCircRNA-26"; exon_number "3" gene_name "Zfp148"; gene_biotype "protein_coding"; oId "lv:circZfp148-522-001|ce:circZfp148-2024-001"; tissue "lv|ce";
16	ncSplice	gene	44028679	44040158	.	-	.	gene_id "16:44028678:44040158:-1"; gene_name "16:44028678:44040158:-1"; gene_source "ncSplice"; gene_biotype "novel";
16	ncSplice	transcript	44028679	44040158	.	-	.	gene_id "16:44028678:44040158:-1"; transcript_id "mmCircRNA-27"; gene_name "16:44028678:44040158:-1"; gene_biotype "novel"; transcript_biotype "circRNA"; oId "lv:circ16:44028678:44040158:-1-534-001|ts:circ16:44028678:44040158:-1-1688-001"; tissue "lv|ts";
16	ncSplice	exon	44028679	44028759	.	-	.	gene_id "16:44028678:44040158:-1"; transcript_id "mmCircRNA-27"; exon_number "1" gene_name "16:44028678:44040158:-1"; gene_biotype "novel"; oId "lv:circ16:44028678:44040158:-1-534-001|ts:circ16:44028678:44040158:-1-1688-001"; tissue "lv|ts";
16	ncSplice	exon	44030294	44030389	.	-	.	gene_id "16:44028678:44040158:-1"; transcript_id "mmCircRNA-27"; exon_number "2" gene_name "16:44028678:44040158:-1"; gene_biotype "novel"; oId "lv:circ16:44028678:44040158:-1-534-001|ts:circ16:44028678:44040158:-1-1688-001"; tissue "lv|ts";
16	ncSplice	exon	44030980	44031083	.	-	.	gene_id "16:44028678:44040158:-1"; transcript_id "mmCircRNA-27"; exon_number "3" gene_name "16:44028678:44040158:-1"; gene_biotype "novel"; oId "lv:circ16:44028678:44040158:-1-534-001|ts:circ16:44028678:44040158:-1-1688-001"; tissue "lv|ts";
16	ncSplice	exon	44040074	44040158	.	-	.	gene_id "16:44028678:44040158:-1"; transcript_id "mmCircRNA-27"; exon_number "4" gene_name "16:44028678:44040158:-1"; gene_biotype "novel"; oId "lv:circ16:44028678:44040158:-1-534-001|ts:circ16:44028678:44040158:-1-1688-001"; tissue "lv|ts";
16	ncSplice	gene	70433545	70441319	.	+	.	gene_id "ENSMUSG00000022707"; gene_name "Gbe1"; gene_source "ncSplice"; gene_biotype "protein_coding";
16	ncSplice	transcript	70433545	70441319	.	+	.	gene_id "ENSMUSG00000022707"; transcript_id "mmCircRNA-28"; gene_name "Gbe1"; gene_biotype "protein_coding"; transcript_biotype "circRNA"; oId "lv:circGbe1-546-001"; tissue "lv";
16	ncSplice	exon	70433545	70433670	.	+	.	gene_id "ENSMUSG00000022707"; transcript_id "mmCircRNA-28"; exon_number "1" gene_name "Gbe1"; gene_biotype "protein_coding"; oId "lv:circGbe1-546-001"; tissue "lv";
16	ncSplice	exon	70434514	70434649	.	+	.	gene_id "ENSMUSG00000022707"; transcript_id "mmCircRNA-28"; exon_number "2" gene_name "Gbe1"; gene_biotype "protein_coding"; oId "lv:circGbe1-546-001"; tissue "lv";
16	ncSplice	exon	70436928	70437018	.	+	.	gene_id "ENSMUSG00000022707"; transcript_id "mmCircRNA-28"; exon_number "3" gene_name "Gbe1"; gene_biotype "protein_coding"; oId "lv:circGbe1-546-001"; tissue "lv";
16	ncSplice	exon	70441110	70441319	.	+	.	gene_id "ENSMUSG00000022707"; transcript_id "mmCircRNA-28"; exon_number "4" gene_name "Gbe1"; gene_biotype "protein_coding"; oId "lv:circGbe1-546-001"; tissue "lv";
16	ncSplice	gene	93847281	93853217	.	+	.	gene_id "ENSMUSG00000039456"; gene_name "Morc3"; gene_source "ncSplice"; gene_biotype "protein_coding";
16	ncSplice	transcript	93847281	93853217	.	+	.	gene_id "ENSMUSG00000039456"; transcript_id "mmCircRNA-29"; gene_name "Morc3"; gene_biotype "protein_coding"; transcript_biotype "circRNA"; oId "lv:circMorc3-556-001|ce:circMorc3-2159-001|ts:circMorc3-1748-001"; tissue "lv|ce|ts";
16	ncSplice	exon	93847281	93847430	.	+	.	gene_id "ENSMUSG00000039456"; transcript_id "mmCircRNA-29"; exon_number "1" gene_name "Morc3"; gene_biotype "protein_coding"; oId "lv:circMorc3-556-001|ce:circMorc3-2159-001|ts:circMorc3-1748-001"; tissue "lv|ce|ts";
16	ncSplice	exon	93849130	93849277	.	+	.	gene_id "ENSMUSG00000039456"; transcript_id "mmCircRNA-29"; exon_number "2" gene_name "Morc3"; gene_biotype "protein_coding"; oId "lv:circMorc3-556-001|ce:circMorc3-2159-001|ts:circMorc3-1748-001"; tissue "lv|ce|ts";
16	ncSplice	exon	93853089	93853217	.	+	.	gene_id "ENSMUSG00000039456"; transcript_id "mmCircRNA-29"; exon_number "3" gene_name "Morc3"; gene_biotype "protein_coding"; oId "lv:circMorc3-556-001|ce:circMorc3-2159-001|ts:circMorc3-1748-001"; tissue "lv|ce|ts";
17	ncSplice	gene	26736789	26743131	.	+	.	gene_id "ENSMUSG00000048249"; gene_name "Crebrf"; gene_source "ncSplice"; gene_biotype "protein_coding";
17	ncSplice	transcript	26736789	26743131	.	+	.	gene_id "ENSMUSG00000048249"; transcript_id "mmCircRNA-30"; gene_name "Crebrf"; gene_biotype "protein_coding"; transcript_biotype "circRNA"; oId "lv:circCrebrf-572-001|ce:circCrebrf-2205-001"; tissue "lv|ce";
17	ncSplice	exon	26736789	26736983	.	+	.	gene_id "ENSMUSG00000048249"; transcript_id "mmCircRNA-30"; exon_number "1" gene_name "Crebrf"; gene_biotype "protein_coding"; oId "lv:circCrebrf-572-001|ce:circCrebrf-2205-001"; tissue "lv|ce";
17	ncSplice	exon	26739543	26739668	.	+	.	gene_id "ENSMUSG00000048249"; transcript_id "mmCircRNA-30"; exon_number "2" gene_name "Crebrf"; gene_biotype "protein_coding"; oId "lv:circCrebrf-572-001|ce:circCrebrf-2205-001"; tissue "lv|ce";
17	ncSplice	exon	26742042	26743131	.	+	.	gene_id "ENSMUSG00000048249"; transcript_id "mmCircRNA-30"; exon_number "3" gene_name "Crebrf"; gene_biotype "protein_coding"; oId "lv:circCrebrf-572-001|ce:circCrebrf-2205-001"; tissue "lv|ce";
17	ncSplice	gene	26739543	26743131	.	+	.	gene_id "ENSMUSG00000048249"; gene_name "Crebrf"; gene_source "ncSplice"; gene_biotype "protein_coding";
17	ncSplice	transcript	26739543	26743131	.	+	.	gene_id "ENSMUSG00000048249"; transcript_id "mmCircRNA-31"; gene_name "Crebrf"; gene_biotype "protein_coding"; transcript_biotype "circRNA"; oId "lv:circCrebrf-575-001"; tissue "lv";
17	ncSplice	exon	26739543	26740514	.	+	.	gene_id "ENSMUSG00000048249"; transcript_id "mmCircRNA-31"; exon_number "1" gene_name "Crebrf"; gene_biotype "protein_coding"; oId "lv:circCrebrf-575-001"; tissue "lv";
17	ncSplice	exon	26742042	26743131	.	+	.	gene_id "ENSMUSG00000048249"; transcript_id "mmCircRNA-31"; exon_number "2" gene_name "Crebrf"; gene_biotype "protein_coding"; oId "lv:circCrebrf-575-001"; tissue "lv";
17	ncSplice	gene	65592291	65595054	.	-	.	gene_id "ENSMUSG00000024091"; gene_name "Vapa"; gene_source "ncSplice"; gene_biotype "protein_coding";
17	ncSplice	transcript	65592291	65595054	.	-	.	gene_id "ENSMUSG00000024091"; transcript_id "mmCircRNA-32"; gene_name "Vapa"; gene_biotype "protein_coding"; transcript_biotype "circRNA"; oId "lv:circVapa-610-001"; tissue "lv";
17	ncSplice	exon	65592291	65592371	.	-	.	gene_id "ENSMUSG00000024091"; transcript_id "mmCircRNA-32"; exon_number "1" gene_name "Vapa"; gene_biotype "protein_coding"; oId "lv:circVapa-610-001"; tissue "lv";
17	ncSplice	exon	65593440	65593543	.	-	.	gene_id "ENSMUSG00000024091"; transcript_id "mmCircRNA-32"; exon_number "2" gene_name "Vapa"; gene_biotype "protein_coding"; oId "lv:circVapa-610-001"; tissue "lv";
17	ncSplice	exon	65594902	65595054	.	-	.	gene_id "ENSMUSG00000024091"; transcript_id "mmCircRNA-32"; exon_number "3" gene_name "Vapa"; gene_biotype "protein_coding"; oId "lv:circVapa-610-001"; tissue "lv";
17	ncSplice	gene	79650302	79659473	.	+	.	gene_id "ENSMUSG00000036368"; gene_name "Rmdn2"; gene_source "ncSplice"; gene_biotype "protein_coding";
17	ncSplice	transcript	79650302	79659473	.	+	.	gene_id "ENSMUSG00000036368"; transcript_id "mmCircRNA-33"; gene_name "Rmdn2"; gene_biotype "protein_coding"; transcript_biotype "circRNA"; oId "lv:circRmdn2-620-002|ce:circRmdn2-2349-001|ts:circRmdn2-1978-001"; tissue "lv|ce|ts";
17	ncSplice	exon	79650302	79650476	.	+	.	gene_id "ENSMUSG00000036368"; transcript_id "mmCircRNA-33"; exon_number "1" gene_name "Rmdn2"; gene_biotype "protein_coding"; oId "lv:circRmdn2-620-002|ce:circRmdn2-2349-001|ts:circRmdn2-1978-001"; tissue "lv|ce|ts";
17	ncSplice	exon	79651699	79651801	.	+	.	gene_id "ENSMUSG00000036368"; transcript_id "mmCircRNA-33"; exon_number "2" gene_name "Rmdn2"; gene_biotype "protein_coding"; oId "lv:circRmdn2-620-002|ce:circRmdn2-2349-001|ts:circRmdn2-1978-001"; tissue "lv|ce|ts";
17	ncSplice	exon	79659413	79659473	.	+	.	gene_id "ENSMUSG00000036368"; transcript_id "mmCircRNA-33"; exon_number "3" gene_name "Rmdn2"; gene_biotype "protein_coding"; oId "lv:circRmdn2-620-002|ce:circRmdn2-2349-001|ts:circRmdn2-1978-001"; tissue "lv|ce|ts";
17	ncSplice	gene	79650302	79672573	.	+	.	gene_id "ENSMUSG00000036368"; gene_name "Rmdn2"; gene_source "ncSplice"; gene_biotype "protein_coding";
17	ncSplice	transcript	79650302	79672573	.	+	.	gene_id "ENSMUSG00000036368"; transcript_id "mmCircRNA-34"; gene_name "Rmdn2"; gene_biotype "protein_coding"; transcript_biotype "circRNA"; oId "lv:circRmdn2-621-008"; tissue "lv";
17	ncSplice	exon	79650302	79650476	.	+	.	gene_id "ENSMUSG00000036368"; transcript_id "mmCircRNA-34"; exon_number "1" gene_name "Rmdn2"; gene_biotype "protein_coding"; oId "lv:circRmdn2-621-008"; tissue "lv";
17	ncSplice	exon	79651699	79651801	.	+	.	gene_id "ENSMUSG00000036368"; transcript_id "mmCircRNA-34"; exon_number "2" gene_name "Rmdn2"; gene_biotype "protein_coding"; oId "lv:circRmdn2-621-008"; tissue "lv";
17	ncSplice	exon	79659413	79659473	.	+	.	gene_id "ENSMUSG00000036368"; transcript_id "mmCircRNA-34"; exon_number "3" gene_name "Rmdn2"; gene_biotype "protein_coding"; oId "lv:circRmdn2-621-008"; tissue "lv";
17	ncSplice	exon	79666871	79666946	.	+	.	gene_id "ENSMUSG00000036368"; transcript_id "mmCircRNA-34"; exon_number "4" gene_name "Rmdn2"; gene_biotype "protein_coding"; oId "lv:circRmdn2-621-008"; tissue "lv";
17	ncSplice	exon	79667951	79668028	.	+	.	gene_id "ENSMUSG00000036368"; transcript_id "mmCircRNA-34"; exon_number "5" gene_name "Rmdn2"; gene_biotype "protein_coding"; oId "lv:circRmdn2-621-008"; tissue "lv";
17	ncSplice	exon	79670557	79670655	.	+	.	gene_id "ENSMUSG00000036368"; transcript_id "mmCircRNA-34"; exon_number "6" gene_name "Rmdn2"; gene_biotype "protein_coding"; oId "lv:circRmdn2-621-008"; tissue "lv";
17	ncSplice	exon	79672350	79672403	.	+	.	gene_id "ENSMUSG00000036368"; transcript_id "mmCircRNA-34"; exon_number "7" gene_name "Rmdn2"; gene_biotype "protein_coding"; oId "lv:circRmdn2-621-008"; tissue "lv";
17	ncSplice	exon	79672493	79672573	.	+	.	gene_id "ENSMUSG00000036368"; transcript_id "mmCircRNA-34"; exon_number "8" gene_name "Rmdn2"; gene_biotype "protein_coding"; oId "lv:circRmdn2-621-008"; tissue "lv";
18	ncSplice	gene	10129305	10132272	.	-	.	gene_id "ENSMUSG00000024290"; gene_name "Rock1"; gene_source "ncSplice"; gene_biotype "protein_coding";
18	ncSplice	transcript	10129305	10132272	.	-	.	gene_id "ENSMUSG00000024290"; transcript_id "mmCircRNA-35"; gene_name "Rock1"; gene_biotype "protein_coding"; transcript_biotype "circRNA"; oId "lv:circRock1-638-001"; tissue "lv";
18	ncSplice	exon	10129305	10129396	.	-	.	gene_id "ENSMUSG00000024290"; transcript_id "mmCircRNA-35"; exon_number "1" gene_name "Rock1"; gene_biotype "protein_coding"; oId "lv:circRock1-638-001"; tissue "lv";
18	ncSplice	exon	10131530	10131668	.	-	.	gene_id "ENSMUSG00000024290"; transcript_id "mmCircRNA-35"; exon_number "2" gene_name "Rock1"; gene_biotype "protein_coding"; oId "lv:circRock1-638-001"; tissue "lv";
18	ncSplice	exon	10132128	10132272	.	-	.	gene_id "ENSMUSG00000024290"; transcript_id "mmCircRNA-35"; exon_number "3" gene_name "Rock1"; gene_biotype "protein_coding"; oId "lv:circRock1-638-001"; tissue "lv";
18	ncSplice	gene	12684837	12698059	.	+	.	gene_id "ENSMUSG00000024424"; gene_name "Ttc39c"; gene_source "ncSplice"; gene_biotype "protein_coding";
18	ncSplice	transcript	12684837	12698059	.	+	.	gene_id "ENSMUSG00000024424"; transcript_id "mmCircRNA-36"; gene_name "Ttc39c"; gene_biotype "protein_coding"; transcript_biotype "circRNA"; oId "lv:circTtc39c-640-007"; tissue "lv";
18	ncSplice	exon	12684837	12684885	.	+	.	gene_id "ENSMUSG00000024424"; transcript_id "mmCircRNA-36"; exon_number "1" gene_name "Ttc39c"; gene_biotype "protein_coding"; oId "lv:circTtc39c-640-007"; tissue "lv";
18	ncSplice	exon	12686952	12687080	.	+	.	gene_id "ENSMUSG00000024424"; transcript_id "mmCircRNA-36"; exon_number "2" gene_name "Ttc39c"; gene_biotype "protein_coding"; oId "lv:circTtc39c-640-007"; tissue "lv";
18	ncSplice	exon	12689773	12689887	.	+	.	gene_id "ENSMUSG00000024424"; transcript_id "mmCircRNA-36"; exon_number "3" gene_name "Ttc39c"; gene_biotype "protein_coding"; oId "lv:circTtc39c-640-007"; tissue "lv";
18	ncSplice	exon	12695236	12695562	.	+	.	gene_id "ENSMUSG00000024424"; transcript_id "mmCircRNA-36"; exon_number "4" gene_name "Ttc39c"; gene_biotype "protein_coding"; oId "lv:circTtc39c-640-007"; tissue "lv";
18	ncSplice	exon	12697891	12698059	.	+	.	gene_id "ENSMUSG00000024424"; transcript_id "mmCircRNA-36"; exon_number "5" gene_name "Ttc39c"; gene_biotype "protein_coding"; oId "lv:circTtc39c-640-007"; tissue "lv";
18	ncSplice	gene	12728620	12730117	.	+	.	gene_id "ENSMUSG00000024424"; gene_name "Ttc39c"; gene_source "ncSplice"; gene_biotype "protein_coding";
18	ncSplice	transcript	12728620	12730117	.	+	.	gene_id "ENSMUSG00000024424"; transcript_id "mmCircRNA-37"; gene_name "Ttc39c"; gene_biotype "protein_coding"; transcript_biotype "circRNA"; oId "lv:circTtc39c-641-001"; tissue "lv";
18	ncSplice	exon	12728620	12728729	.	+	.	gene_id "ENSMUSG00000024424"; transcript_id "mmCircRNA-37"; exon_number "1" gene_name "Ttc39c"; gene_biotype "protein_coding"; oId "lv:circTtc39c-641-001"; tissue "lv";
18	ncSplice	exon	12729994	12730117	.	+	.	gene_id "ENSMUSG00000024424"; transcript_id "mmCircRNA-37"; exon_number "2" gene_name "Ttc39c"; gene_biotype "protein_coding"; oId "lv:circTtc39c-641-001"; tissue "lv";
18	ncSplice	gene	16640422	16650498	.	-	.	gene_id "ENSMUSG00000024304"; gene_name "Cdh2"; gene_source "ncSplice"; gene_biotype "protein_coding";
18	ncSplice	transcript	16640422	16650498	.	-	.	gene_id "ENSMUSG00000024304"; transcript_id "mmCircRNA-38"; gene_name "Cdh2"; gene_biotype "protein_coding"; transcript_biotype "circRNA"; oId "lv:circCdh2-642-001"; tissue "lv";
18	ncSplice	exon	16640422	16640594	.	-	.	gene_id "ENSMUSG00000024304"; transcript_id "mmCircRNA-38"; exon_number "1" gene_name "Cdh2"; gene_biotype "protein_coding"; oId "lv:circCdh2-642-001"; tissue "lv";
18	ncSplice	exon	16643930	16644074	.	-	.	gene_id "ENSMUSG00000024304"; transcript_id "mmCircRNA-38"; exon_number "2" gene_name "Cdh2"; gene_biotype "protein_coding"; oId "lv:circCdh2-642-001"; tissue "lv";
18	ncSplice	exon	16646472	16646627	.	-	.	gene_id "ENSMUSG00000024304"; transcript_id "mmCircRNA-38"; exon_number "3" gene_name "Cdh2"; gene_biotype "protein_coding"; oId "lv:circCdh2-642-001"; tissue "lv";
18	ncSplice	exon	16648487	16648633	.	-	.	gene_id "ENSMUSG00000024304"; transcript_id "mmCircRNA-38"; exon_number "4" gene_name "Cdh2"; gene_biotype "protein_coding"; oId "lv:circCdh2-642-001"; tissue "lv";
18	ncSplice	exon	16650272	16650498	.	-	.	gene_id "ENSMUSG00000024304"; transcript_id "mmCircRNA-38"; exon_number "5" gene_name "Cdh2"; gene_biotype "protein_coding"; oId "lv:circCdh2-642-001"; tissue "lv";
1	ncSplice	gene	87364104	87380008	.	+	.	gene_id "ENSMUSG00000048000"; gene_name "Gigyf2"; gene_source "ncSplice"; gene_biotype "protein_coding";
1	ncSplice	transcript	87364104	87380008	.	+	.	gene_id "ENSMUSG00000048000"; transcript_id "mmCircRNA-39"; gene_name "Gigyf2"; gene_biotype "protein_coding"; transcript_biotype "circRNA"; oId "lv:circGigyf2-673-001"; tissue "lv";
1	ncSplice	exon	87364104	87364477	.	+	.	gene_id "ENSMUSG00000048000"; transcript_id "mmCircRNA-39"; exon_number "1" gene_name "Gigyf2"; gene_biotype "protein_coding"; oId "lv:circGigyf2-673-001"; tissue "lv";
1	ncSplice	exon	87365184	87365279	.	+	.	gene_id "ENSMUSG00000048000"; transcript_id "mmCircRNA-39"; exon_number "2" gene_name "Gigyf2"; gene_biotype "protein_coding"; oId "lv:circGigyf2-673-001"; tissue "lv";
1	ncSplice	exon	87373997	87374111	.	+	.	gene_id "ENSMUSG00000048000"; transcript_id "mmCircRNA-39"; exon_number "3" gene_name "Gigyf2"; gene_biotype "protein_coding"; oId "lv:circGigyf2-673-001"; tissue "lv";
1	ncSplice	exon	87378972	87379083	.	+	.	gene_id "ENSMUSG00000048000"; transcript_id "mmCircRNA-39"; exon_number "4" gene_name "Gigyf2"; gene_biotype "protein_coding"; oId "lv:circGigyf2-673-001"; tissue "lv";
1	ncSplice	exon	87379968	87380008	.	+	.	gene_id "ENSMUSG00000048000"; transcript_id "mmCircRNA-39"; exon_number "5" gene_name "Gigyf2"; gene_biotype "protein_coding"; oId "lv:circGigyf2-673-001"; tissue "lv";
19	ncSplice	gene	40153519	40167623	.	-	.	gene_id "ENSMUSG00000060613"; gene_name "Cyp2c70"; gene_source "ncSplice"; gene_biotype "protein_coding";
19	ncSplice	transcript	40153519	40167623	.	-	.	gene_id "ENSMUSG00000060613"; transcript_id "mmCircRNA-40"; gene_name "Cyp2c70"; gene_biotype "protein_coding"; transcript_biotype "circRNA"; oId "lv:circCyp2c70-728-001"; tissue "lv";
19	ncSplice	exon	40153519	40160742	.	-	.	gene_id "ENSMUSG00000060613"; transcript_id "mmCircRNA-40"; exon_number "1" gene_name "Cyp2c70"; gene_biotype "protein_coding"; oId "lv:circCyp2c70-728-001"; tissue "lv";
19	ncSplice	exon	40164352	40167623	.	-	.	gene_id "ENSMUSG00000060613"; transcript_id "mmCircRNA-40"; exon_number "2" gene_name "Cyp2c70"; gene_biotype "protein_coding"; oId "lv:circCyp2c70-728-001"; tissue "lv";
19	ncSplice	gene	45630865	45640521	.	-	.	gene_id "ENSMUSG00000040913"; gene_name "Fbxw4"; gene_source "ncSplice"; gene_biotype "protein_coding";
19	ncSplice	transcript	45630865	45640521	.	-	.	gene_id "ENSMUSG00000040913"; transcript_id "mmCircRNA-41"; gene_name "Fbxw4"; gene_biotype "protein_coding"; transcript_biotype "circRNA"; oId "lv:circFbxw4-743-001|ce:circFbxw4-2790-001"; tissue "lv|ce";
19	ncSplice	exon	45630865	45630959	.	-	.	gene_id "ENSMUSG00000040913"; transcript_id "mmCircRNA-41"; exon_number "1" gene_name "Fbxw4"; gene_biotype "protein_coding"; oId "lv:circFbxw4-743-001|ce:circFbxw4-2790-001"; tissue "lv|ce";
19	ncSplice	exon	45635735	45635867	.	-	.	gene_id "ENSMUSG00000040913"; transcript_id "mmCircRNA-41"; exon_number "2" gene_name "Fbxw4"; gene_biotype "protein_coding"; oId "lv:circFbxw4-743-001|ce:circFbxw4-2790-001"; tissue "lv|ce";
19	ncSplice	exon	45636263	45636448	.	-	.	gene_id "ENSMUSG00000040913"; transcript_id "mmCircRNA-41"; exon_number "3" gene_name "Fbxw4"; gene_biotype "protein_coding"; oId "lv:circFbxw4-743-001|ce:circFbxw4-2790-001"; tissue "lv|ce";
19	ncSplice	exon	45640426	45640521	.	-	.	gene_id "ENSMUSG00000040913"; transcript_id "mmCircRNA-41"; exon_number "4" gene_name "Fbxw4"; gene_biotype "protein_coding"; oId "lv:circFbxw4-743-001|ce:circFbxw4-2790-001"; tissue "lv|ce";
19	ncSplice	gene	4792398	4794009	.	-	.	gene_id "ENSMUSG00000094936"; gene_name "Rbm4"; gene_source "ncSplice"; gene_biotype "protein_coding";
19	ncSplice	transcript	4792398	4794009	.	-	.	gene_id "ENSMUSG00000094936"; transcript_id "mmCircRNA-42"; gene_name "Rbm4"; gene_biotype "protein_coding"; transcript_biotype "circRNA"; oId "lv:circRbm4-749-001|ce:circRbm4-2804-001"; tissue "lv|ce";
19	ncSplice	exon	4792398	4792820	.	-	.	gene_id "ENSMUSG00000094936"; transcript_id "mmCircRNA-42"; exon_number "1" gene_name "Rbm4"; gene_biotype "protein_coding"; oId "lv:circRbm4-749-001|ce:circRbm4-2804-001"; tissue "lv|ce";
19	ncSplice	exon	4793926	4794009	.	-	.	gene_id "ENSMUSG00000094936"; transcript_id "mmCircRNA-42"; exon_number "2" gene_name "Rbm4"; gene_biotype "protein_coding"; oId "lv:circRbm4-749-001|ce:circRbm4-2804-001"; tissue "lv|ce";
2	ncSplice	gene	70768862	70786995	.	-	.	gene_id "ENSMUSG00000041997"; gene_name "Tlk1"; gene_source "ncSplice"; gene_biotype "protein_coding";
2	ncSplice	transcript	70768862	70786995	.	-	.	gene_id "ENSMUSG00000041997"; transcript_id "mmCircRNA-43"; gene_name "Tlk1"; gene_biotype "protein_coding"; transcript_biotype "circRNA"; oId "lv:circTlk1-901-001|ce:circTlk1-3331-001|ts:circTlk1-3213-001"; tissue "lv|ce|ts";
2	ncSplice	exon	70768862	70768930	.	-	.	gene_id "ENSMUSG00000041997"; transcript_id "mmCircRNA-43"; exon_number "1" gene_name "Tlk1"; gene_biotype "protein_coding"; oId "lv:circTlk1-901-001|ce:circTlk1-3331-001|ts:circTlk1-3213-001"; tissue "lv|ce|ts";
2	ncSplice	exon	70770004	70770075	.	-	.	gene_id "ENSMUSG00000041997"; transcript_id "mmCircRNA-43"; exon_number "2" gene_name "Tlk1"; gene_biotype "protein_coding"; oId "lv:circTlk1-901-001|ce:circTlk1-3331-001|ts:circTlk1-3213-001"; tissue "lv|ce|ts";
2	ncSplice	exon	70786877	70786995	.	-	.	gene_id "ENSMUSG00000041997"; transcript_id "mmCircRNA-43"; exon_number "3" gene_name "Tlk1"; gene_biotype "protein_coding"; oId "lv:circTlk1-901-001|ce:circTlk1-3331-001|ts:circTlk1-3213-001"; tissue "lv|ce|ts";
3	ncSplice	gene	121228310	121235764	.	-	.	gene_id "ENSMUSG00000028132"; gene_name "Tmem56"; gene_source "ncSplice"; gene_biotype "protein_coding";
3	ncSplice	transcript	121228310	121235764	.	-	.	gene_id "ENSMUSG00000028132"; transcript_id "mmCircRNA-44"; gene_name "Tmem56"; gene_biotype "protein_coding"; transcript_biotype "circRNA"; oId "lv:circTmem56-929-002|ce:circTmem56-3434-001"; tissue "lv|ce";
3	ncSplice	exon	121228310	121228404	.	-	.	gene_id "ENSMUSG00000028132"; transcript_id "mmCircRNA-44"; exon_number "1" gene_name "Tmem56"; gene_biotype "protein_coding"; oId "lv:circTmem56-929-002|ce:circTmem56-3434-001"; tissue "lv|ce";
3	ncSplice	exon	121228848	121228906	.	-	.	gene_id "ENSMUSG00000028132"; transcript_id "mmCircRNA-44"; exon_number "2" gene_name "Tmem56"; gene_biotype "protein_coding"; oId "lv:circTmem56-929-002|ce:circTmem56-3434-001"; tissue "lv|ce";
3	ncSplice	exon	121231234	121231323	.	-	.	gene_id "ENSMUSG00000028132"; transcript_id "mmCircRNA-44"; exon_number "3" gene_name "Tmem56"; gene_biotype "protein_coding"; oId "lv:circTmem56-929-002|ce:circTmem56-3434-001"; tissue "lv|ce";
3	ncSplice	exon	121235043	121235247	.	-	.	gene_id "ENSMUSG00000028132"; transcript_id "mmCircRNA-44"; exon_number "4" gene_name "Tmem56"; gene_biotype "protein_coding"; oId "lv:circTmem56-929-002|ce:circTmem56-3434-001"; tissue "lv|ce";
3	ncSplice	exon	121235670	121235764	.	-	.	gene_id "ENSMUSG00000028132"; transcript_id "mmCircRNA-44"; exon_number "5" gene_name "Tmem56"; gene_biotype "protein_coding"; oId "lv:circTmem56-929-002|ce:circTmem56-3434-001"; tissue "lv|ce";
3	ncSplice	gene	89001773	89007877	.	+	.	gene_id "ENSMUSG00000028053"; gene_name "Ash1l"; gene_source "ncSplice"; gene_biotype "protein_coding";
3	ncSplice	transcript	89001773	89007877	.	+	.	gene_id "ENSMUSG00000028053"; transcript_id "mmCircRNA-45"; gene_name "Ash1l"; gene_biotype "protein_coding"; transcript_biotype "circRNA"; oId "lv:circAsh1l-969-001|ce:circAsh1l-3632-001|ts:circAsh1l-3548-001"; tissue "lv|ce|ts";
3	ncSplice	exon	89001773	89001874	.	+	.	gene_id "ENSMUSG00000028053"; transcript_id "mmCircRNA-45"; exon_number "1" gene_name "Ash1l"; gene_biotype "protein_coding"; oId "lv:circAsh1l-969-001|ce:circAsh1l-3632-001|ts:circAsh1l-3548-001"; tissue "lv|ce|ts";
3	ncSplice	exon	89007142	89007877	.	+	.	gene_id "ENSMUSG00000028053"; transcript_id "mmCircRNA-45"; exon_number "2" gene_name "Ash1l"; gene_biotype "protein_coding"; oId "lv:circAsh1l-969-001|ce:circAsh1l-3632-001|ts:circAsh1l-3548-001"; tissue "lv|ce|ts";
4	ncSplice	gene	59514274	59524476	.	-	.	gene_id "ENSMUSG00000028382"; gene_name "Ptbp3"; gene_source "ncSplice"; gene_biotype "protein_coding";
4	ncSplice	transcript	59514274	59524476	.	-	.	gene_id "ENSMUSG00000028382"; transcript_id "mmCircRNA-46"; gene_name "Ptbp3"; gene_biotype "protein_coding"; transcript_biotype "circRNA"; oId "lv:circPtbp3-1064-001|ce:circPtbp3-3984-001|ts:circPtbp3-3823-001"; tissue "lv|ce|ts";
4	ncSplice	exon	59514274	59514420	.	-	.	gene_id "ENSMUSG00000028382"; transcript_id "mmCircRNA-46"; exon_number "1" gene_name "Ptbp3"; gene_biotype "protein_coding"; oId "lv:circPtbp3-1064-001|ce:circPtbp3-3984-001|ts:circPtbp3-3823-001"; tissue "lv|ce|ts";
4	ncSplice	exon	59517586	59517755	.	-	.	gene_id "ENSMUSG00000028382"; transcript_id "mmCircRNA-46"; exon_number "2" gene_name "Ptbp3"; gene_biotype "protein_coding"; oId "lv:circPtbp3-1064-001|ce:circPtbp3-3984-001|ts:circPtbp3-3823-001"; tissue "lv|ce|ts";
4	ncSplice	exon	59524404	59524476	.	-	.	gene_id "ENSMUSG00000028382"; transcript_id "mmCircRNA-46"; exon_number "3" gene_name "Ptbp3"; gene_biotype "protein_coding"; oId "lv:circPtbp3-1064-001|ce:circPtbp3-3984-001|ts:circPtbp3-3823-001"; tissue "lv|ce|ts";
4	ncSplice	gene	9583812	9610938	.	-	.	gene_id "ENSMUSG00000028207"; gene_name "Asph"; gene_source "ncSplice"; gene_biotype "protein_coding";
4	ncSplice	transcript	9583812	9610938	.	-	.	gene_id "ENSMUSG00000028207"; transcript_id "mmCircRNA-47"; gene_name "Asph"; gene_biotype "protein_coding"; transcript_biotype "circRNA"; oId "lv:circAsph-1079-003|ce:circAsph-4068-005"; tissue "lv|ce";
4	ncSplice	exon	9583812	9583856	.	-	.	gene_id "ENSMUSG00000028207"; transcript_id "mmCircRNA-47"; exon_number "1" gene_name "Asph"; gene_biotype "protein_coding"; oId "lv:circAsph-1079-003|ce:circAsph-4068-005"; tissue "lv|ce";
4	ncSplice	exon	9594663	9594698	.	-	.	gene_id "ENSMUSG00000028207"; transcript_id "mmCircRNA-47"; exon_number "2" gene_name "Asph"; gene_biotype "protein_coding"; oId "lv:circAsph-1079-003|ce:circAsph-4068-005"; tissue "lv|ce";
4	ncSplice	exon	9595377	9595415	.	-	.	gene_id "ENSMUSG00000028207"; transcript_id "mmCircRNA-47"; exon_number "3" gene_name "Asph"; gene_biotype "protein_coding"; oId "lv:circAsph-1079-003|ce:circAsph-4068-005"; tissue "lv|ce";
4	ncSplice	exon	9598269	9598301	.	-	.	gene_id "ENSMUSG00000028207"; transcript_id "mmCircRNA-47"; exon_number "4" gene_name "Asph"; gene_biotype "protein_coding"; oId "lv:circAsph-1079-003|ce:circAsph-4068-005"; tissue "lv|ce";
4	ncSplice	exon	9601307	9601363	.	-	.	gene_id "ENSMUSG00000028207"; transcript_id "mmCircRNA-47"; exon_number "5" gene_name "Asph"; gene_biotype "protein_coding"; oId "lv:circAsph-1079-003|ce:circAsph-4068-005"; tissue "lv|ce";
4	ncSplice	exon	9602469	9602501	.	-	.	gene_id "ENSMUSG00000028207"; transcript_id "mmCircRNA-47"; exon_number "6" gene_name "Asph"; gene_biotype "protein_coding"; oId "lv:circAsph-1079-003|ce:circAsph-4068-005"; tissue "lv|ce";
4	ncSplice	exon	9604516	9604629	.	-	.	gene_id "ENSMUSG00000028207"; transcript_id "mmCircRNA-47"; exon_number "7" gene_name "Asph"; gene_biotype "protein_coding"; oId "lv:circAsph-1079-003|ce:circAsph-4068-005"; tissue "lv|ce";
4	ncSplice	exon	9607797	9607871	.	-	.	gene_id "ENSMUSG00000028207"; transcript_id "mmCircRNA-47"; exon_number "8" gene_name "Asph"; gene_biotype "protein_coding"; oId "lv:circAsph-1079-003|ce:circAsph-4068-005"; tissue "lv|ce";
4	ncSplice	exon	9610843	9610938	.	-	.	gene_id "ENSMUSG00000028207"; transcript_id "mmCircRNA-47"; exon_number "9" gene_name "Asph"; gene_biotype "protein_coding"; oId "lv:circAsph-1079-003|ce:circAsph-4068-005"; tissue "lv|ce";
4	ncSplice	gene	9635901	9639347	.	-	.	gene_id "ENSMUSG00000028207"; gene_name "Asph"; gene_source "ncSplice"; gene_biotype "protein_coding";
4	ncSplice	transcript	9635901	9639347	.	-	.	gene_id "ENSMUSG00000028207"; transcript_id "mmCircRNA-48"; gene_name "Asph"; gene_biotype "protein_coding"; transcript_biotype "circRNA"; oId "lv:circAsph-1083-001|ce:circAsph-4071-001"; tissue "lv|ce";
4	ncSplice	exon	9635901	9635969	.	-	.	gene_id "ENSMUSG00000028207"; transcript_id "mmCircRNA-48"; exon_number "1" gene_name "Asph"; gene_biotype "protein_coding"; oId "lv:circAsph-1083-001|ce:circAsph-4071-001"; tissue "lv|ce";
4	ncSplice	exon	9637659	9637703	.	-	.	gene_id "ENSMUSG00000028207"; transcript_id "mmCircRNA-48"; exon_number "2" gene_name "Asph"; gene_biotype "protein_coding"; oId "lv:circAsph-1083-001|ce:circAsph-4071-001"; tissue "lv|ce";
4	ncSplice	exon	9639198	9639347	.	-	.	gene_id "ENSMUSG00000028207"; transcript_id "mmCircRNA-48"; exon_number "3" gene_name "Asph"; gene_biotype "protein_coding"; oId "lv:circAsph-1083-001|ce:circAsph-4071-001"; tissue "lv|ce";
5	ncSplice	gene	107764676	107799260	.	-	.	gene_id "ENSMUSG00000011831"; gene_name "Evi5"; gene_source "ncSplice"; gene_biotype "protein_coding";
5	ncSplice	transcript	107764676	107799260	.	-	.	gene_id "ENSMUSG00000011831"; transcript_id "mmCircRNA-49"; gene_name "Evi5"; gene_biotype "protein_coding"; transcript_biotype "circRNA"; oId "lv:circEvi5-1097-005"; tissue "lv";
5	ncSplice	exon	107764676	107764771	.	-	.	gene_id "ENSMUSG00000011831"; transcript_id "mmCircRNA-49"; exon_number "1" gene_name "Evi5"; gene_biotype "protein_coding"; oId "lv:circEvi5-1097-005"; tissue "lv";
5	ncSplice	exon	107788199	107788294	.	-	.	gene_id "ENSMUSG00000011831"; transcript_id "mmCircRNA-49"; exon_number "2" gene_name "Evi5"; gene_biotype "protein_coding"; oId "lv:circEvi5-1097-005"; tissue "lv";
5	ncSplice	exon	107790362	107790508	.	-	.	gene_id "ENSMUSG00000011831"; transcript_id "mmCircRNA-49"; exon_number "3" gene_name "Evi5"; gene_biotype "protein_coding"; oId "lv:circEvi5-1097-005"; tissue "lv";
5	ncSplice	exon	107795699	107795857	.	-	.	gene_id "ENSMUSG00000011831"; transcript_id "mmCircRNA-49"; exon_number "4" gene_name "Evi5"; gene_biotype "protein_coding"; oId "lv:circEvi5-1097-005"; tissue "lv";
5	ncSplice	exon	107797813	107797953	.	-	.	gene_id "ENSMUSG00000011831"; transcript_id "mmCircRNA-49"; exon_number "5" gene_name "Evi5"; gene_biotype "protein_coding"; oId "lv:circEvi5-1097-005"; tissue "lv";
5	ncSplice	exon	107799126	107799260	.	-	.	gene_id "ENSMUSG00000011831"; transcript_id "mmCircRNA-49"; exon_number "6" gene_name "Evi5"; gene_biotype "protein_coding"; oId "lv:circEvi5-1097-005"; tissue "lv";
5	ncSplice	gene	3747021	3772787	.	-	.	gene_id "ENSMUSG00000040351"; gene_name "Ankib1"; gene_source "ncSplice"; gene_biotype "protein_coding";
5	ncSplice	transcript	3747021	3772787	.	-	.	gene_id "ENSMUSG00000040351"; transcript_id "mmCircRNA-50"; gene_name "Ankib1"; gene_biotype "protein_coding"; transcript_biotype "circRNA"; oId "lv:circAnkib1-1164-002|ce:circAnkib1-4385-001|ts:circAnkib1-4097-006"; tissue "lv|ce|ts";
5	ncSplice	exon	3747021	3747138	.	-	.	gene_id "ENSMUSG00000040351"; transcript_id "mmCircRNA-50"; exon_number "1" gene_name "Ankib1"; gene_biotype "protein_coding"; oId "lv:circAnkib1-1164-002|ce:circAnkib1-4385-001|ts:circAnkib1-4097-006"; tissue "lv|ce|ts";
5	ncSplice	exon	3755594	3755776	.	-	.	gene_id "ENSMUSG00000040351"; transcript_id "mmCircRNA-50"; exon_number "2" gene_name "Ankib1"; gene_biotype "protein_coding"; oId "lv:circAnkib1-1164-002|ce:circAnkib1-4385-001|ts:circAnkib1-4097-006"; tissue "lv|ce|ts";
5	ncSplice	exon	3769429	3769729	.	-	.	gene_id "ENSMUSG00000040351"; transcript_id "mmCircRNA-50"; exon_number "3" gene_name "Ankib1"; gene_biotype "protein_coding"; oId "lv:circAnkib1-1164-002|ce:circAnkib1-4385-001|ts:circAnkib1-4097-006"; tissue "lv|ce|ts";
5	ncSplice	exon	3772517	3772787	.	-	.	gene_id "ENSMUSG00000040351"; transcript_id "mmCircRNA-50"; exon_number "4" gene_name "Ankib1"; gene_biotype "protein_coding"; oId "lv:circAnkib1-1164-002|ce:circAnkib1-4385-001|ts:circAnkib1-4097-006"; tissue "lv|ce|ts";
6	ncSplice	gene	119920110	119921028	.	+	.	gene_id "ENSMUSG00000030166"; gene_name "Rad52"; gene_source "ncSplice"; gene_biotype "protein_coding";
6	ncSplice	transcript	119920110	119921028	.	+	.	gene_id "ENSMUSG00000030166"; transcript_id "mmCircRNA-51"; gene_name "Rad52"; gene_biotype "protein_coding"; transcript_biotype "circRNA"; oId "lv:circRad52-1203-001|ce:circRad52-4551-001|ts:circRad52-4231-001"; tissue "lv|ce|ts";
6	ncSplice	exon	119920110	119920190	.	+	.	gene_id "ENSMUSG00000030166"; transcript_id "mmCircRNA-51"; exon_number "1" gene_name "Rad52"; gene_biotype "protein_coding"; oId "lv:circRad52-1203-001|ce:circRad52-4551-001|ts:circRad52-4231-001"; tissue "lv|ce|ts";
6	ncSplice	exon	119920807	119921028	.	+	.	gene_id "ENSMUSG00000030166"; transcript_id "mmCircRNA-51"; exon_number "2" gene_name "Rad52"; gene_biotype "protein_coding"; oId "lv:circRad52-1203-001|ce:circRad52-4551-001|ts:circRad52-4231-001"; tissue "lv|ce|ts";
6	ncSplice	gene	8537817	8582790	.	+	.	gene_id "ENSMUSG00000029638"; gene_name "Glcci1"; gene_source "ncSplice"; gene_biotype "protein_coding";
6	ncSplice	transcript	8537817	8582790	.	+	.	gene_id "ENSMUSG00000029638"; transcript_id "mmCircRNA-52"; gene_name "Glcci1"; gene_biotype "protein_coding"; transcript_biotype "circRNA"; oId "lv:circGlcci1-1275-002|ce:circGlcci1-4799-004|ts:circGlcci1-4434-008"; tissue "lv|ce|ts";
6	ncSplice	exon	8537817	8537968	.	+	.	gene_id "ENSMUSG00000029638"; transcript_id "mmCircRNA-52"; exon_number "1" gene_name "Glcci1"; gene_biotype "protein_coding"; oId "lv:circGlcci1-1275-002|ce:circGlcci1-4799-004|ts:circGlcci1-4434-008"; tissue "lv|ce|ts";
6	ncSplice	exon	8558500	8558586	.	+	.	gene_id "ENSMUSG00000029638"; transcript_id "mmCircRNA-52"; exon_number "2" gene_name "Glcci1"; gene_biotype "protein_coding"; oId "lv:circGlcci1-1275-002|ce:circGlcci1-4799-004|ts:circGlcci1-4434-008"; tissue "lv|ce|ts";
6	ncSplice	exon	8573185	8573298	.	+	.	gene_id "ENSMUSG00000029638"; transcript_id "mmCircRNA-52"; exon_number "3" gene_name "Glcci1"; gene_biotype "protein_coding"; oId "lv:circGlcci1-1275-002|ce:circGlcci1-4799-004|ts:circGlcci1-4434-008"; tissue "lv|ce|ts";
6	ncSplice	exon	8579587	8579739	.	+	.	gene_id "ENSMUSG00000029638"; transcript_id "mmCircRNA-52"; exon_number "4" gene_name "Glcci1"; gene_biotype "protein_coding"; oId "lv:circGlcci1-1275-002|ce:circGlcci1-4799-004|ts:circGlcci1-4434-008"; tissue "lv|ce|ts";
6	ncSplice	exon	8582580	8582790	.	+	.	gene_id "ENSMUSG00000029638"; transcript_id "mmCircRNA-52"; exon_number "5" gene_name "Glcci1"; gene_biotype "protein_coding"; oId "lv:circGlcci1-1275-002|ce:circGlcci1-4799-004|ts:circGlcci1-4434-008"; tissue "lv|ce|ts";
7	ncSplice	gene	121047838	121057399	.	+	.	gene_id "ENSMUSG00000030876"; gene_name "Mettl9"; gene_source "ncSplice"; gene_biotype "protein_coding";
7	ncSplice	transcript	121047838	121057399	.	+	.	gene_id "ENSMUSG00000030876"; transcript_id "mmCircRNA-53"; gene_name "Mettl9"; gene_biotype "protein_coding"; transcript_biotype "circRNA"; oId "lv:circMettl9-1308-001|ce:circMettl9-4901-001|ts:circMettl9-4536-002"; tissue "lv|ce|ts";
7	ncSplice	exon	121047838	121048028	.	+	.	gene_id "ENSMUSG00000030876"; transcript_id "mmCircRNA-53"; exon_number "1" gene_name "Mettl9"; gene_biotype "protein_coding"; oId "lv:circMettl9-1308-001|ce:circMettl9-4901-001|ts:circMettl9-4536-002"; tissue "lv|ce|ts";
7	ncSplice	exon	121052087	121052296	.	+	.	gene_id "ENSMUSG00000030876"; transcript_id "mmCircRNA-53"; exon_number "2" gene_name "Mettl9"; gene_biotype "protein_coding"; oId "lv:circMettl9-1308-001|ce:circMettl9-4901-001|ts:circMettl9-4536-002"; tissue "lv|ce|ts";
7	ncSplice	exon	121057215	121057399	.	+	.	gene_id "ENSMUSG00000030876"; transcript_id "mmCircRNA-53"; exon_number "3" gene_name "Mettl9"; gene_biotype "protein_coding"; oId "lv:circMettl9-1308-001|ce:circMettl9-4901-001|ts:circMettl9-4536-002"; tissue "lv|ce|ts";
7	ncSplice	gene	132948044	132950435	.	+	.	gene_id "ENSMUSG00000030967"; gene_name "Zranb1"; gene_source "ncSplice"; gene_biotype "protein_coding";
7	ncSplice	transcript	132948044	132950435	.	+	.	gene_id "ENSMUSG00000030967"; transcript_id "mmCircRNA-54"; gene_name "Zranb1"; gene_biotype "protein_coding"; transcript_biotype "circRNA"; oId "lv:circZranb1-1320-001|ce:circZranb1-4955-001|ts:circZranb1-4572-002"; tissue "lv|ce|ts";
7	ncSplice	exon	132948044	132948208	.	+	.	gene_id "ENSMUSG00000030967"; transcript_id "mmCircRNA-54"; exon_number "1" gene_name "Zranb1"; gene_biotype "protein_coding"; oId "lv:circZranb1-1320-001|ce:circZranb1-4955-001|ts:circZranb1-4572-002"; tissue "lv|ce|ts";
7	ncSplice	exon	132949585	132950435	.	+	.	gene_id "ENSMUSG00000030967"; transcript_id "mmCircRNA-54"; exon_number "2" gene_name "Zranb1"; gene_biotype "protein_coding"; oId "lv:circZranb1-1320-001|ce:circZranb1-4955-001|ts:circZranb1-4572-002"; tissue "lv|ce|ts";
7	ncSplice	gene	99935162	99955540	.	-	.	gene_id "ENSMUSG00000058761"; gene_name "Rnf169"; gene_source "ncSplice"; gene_biotype "protein_coding";
7	ncSplice	transcript	99935162	99955540	.	-	.	gene_id "ENSMUSG00000058761"; transcript_id "mmCircRNA-55"; gene_name "Rnf169"; gene_biotype "protein_coding"; transcript_biotype "circRNA"; oId "lv:circRnf169-1367-001|ce:circRnf169-5149-001|ts:circRnf169-4737-001"; tissue "lv|ce|ts";
7	ncSplice	exon	99935162	99935280	.	-	.	gene_id "ENSMUSG00000058761"; transcript_id "mmCircRNA-55"; exon_number "1" gene_name "Rnf169"; gene_biotype "protein_coding"; oId "lv:circRnf169-1367-001|ce:circRnf169-5149-001|ts:circRnf169-4737-001"; tissue "lv|ce|ts";
7	ncSplice	exon	99942959	99943105	.	-	.	gene_id "ENSMUSG00000058761"; transcript_id "mmCircRNA-55"; exon_number "2" gene_name "Rnf169"; gene_biotype "protein_coding"; oId "lv:circRnf169-1367-001|ce:circRnf169-5149-001|ts:circRnf169-4737-001"; tissue "lv|ce|ts";
7	ncSplice	exon	99955467	99955540	.	-	.	gene_id "ENSMUSG00000058761"; transcript_id "mmCircRNA-55"; exon_number "3" gene_name "Rnf169"; gene_biotype "protein_coding"; oId "lv:circRnf169-1367-001|ce:circRnf169-5149-001|ts:circRnf169-4737-001"; tissue "lv|ce|ts";
8	ncSplice	gene	123382527	123383443	.	+	.	gene_id "ENSMUSG00000001472"; gene_name "Tcf25"; gene_source "ncSplice"; gene_biotype "protein_coding";
8	ncSplice	transcript	123382527	123383443	.	+	.	gene_id "ENSMUSG00000001472"; transcript_id "mmCircRNA-56"; gene_name "Tcf25"; gene_biotype "protein_coding"; transcript_biotype "circRNA"; oId "lv:circTcf25-1384-002|ce:circTcf25-5225-001"; tissue "lv|ce";
8	ncSplice	exon	123382527	123382601	.	+	.	gene_id "ENSMUSG00000001472"; transcript_id "mmCircRNA-56"; exon_number "1" gene_name "Tcf25"; gene_biotype "protein_coding"; oId "lv:circTcf25-1384-002|ce:circTcf25-5225-001"; tissue "lv|ce";
8	ncSplice	exon	123383325	123383443	.	+	.	gene_id "ENSMUSG00000001472"; transcript_id "mmCircRNA-56"; exon_number "2" gene_name "Tcf25"; gene_biotype "protein_coding"; oId "lv:circTcf25-1384-002|ce:circTcf25-5225-001"; tissue "lv|ce";
8	ncSplice	gene	67904117	67908889	.	-	.	gene_id "ENSMUSG00000030465"; gene_name "Psd3"; gene_source "ncSplice"; gene_biotype "protein_coding";
8	ncSplice	transcript	67904117	67908889	.	-	.	gene_id "ENSMUSG00000030465"; transcript_id "mmCircRNA-57"; gene_name "Psd3"; gene_biotype "protein_coding"; transcript_biotype "circRNA"; oId "lv:circPsd3-1408-001|ce:circPsd3-5340-001"; tissue "lv|ce";
8	ncSplice	exon	67904117	67904175	.	-	.	gene_id "ENSMUSG00000030465"; transcript_id "mmCircRNA-57"; exon_number "1" gene_name "Psd3"; gene_biotype "protein_coding"; oId "lv:circPsd3-1408-001|ce:circPsd3-5340-001"; tissue "lv|ce";
8	ncSplice	exon	67906259	67906371	.	-	.	gene_id "ENSMUSG00000030465"; transcript_id "mmCircRNA-57"; exon_number "2" gene_name "Psd3"; gene_biotype "protein_coding"; oId "lv:circPsd3-1408-001|ce:circPsd3-5340-001"; tissue "lv|ce";
8	ncSplice	exon	67908486	67908566	.	-	.	gene_id "ENSMUSG00000030465"; transcript_id "mmCircRNA-57"; exon_number "3" gene_name "Psd3"; gene_biotype "protein_coding"; oId "lv:circPsd3-1408-001|ce:circPsd3-5340-001"; tissue "lv|ce";
8	ncSplice	exon	67908683	67908889	.	-	.	gene_id "ENSMUSG00000030465"; transcript_id "mmCircRNA-57"; exon_number "4" gene_name "Psd3"; gene_biotype "protein_coding"; oId "lv:circPsd3-1408-001|ce:circPsd3-5340-001"; tissue "lv|ce";
8	ncSplice	gene	86665691	86673069	.	+	.	gene_id "ENSMUSG00000047866"; gene_name "Lonp2"; gene_source "ncSplice"; gene_biotype "protein_coding";
8	ncSplice	transcript	86665691	86673069	.	+	.	gene_id "ENSMUSG00000047866"; transcript_id "mmCircRNA-58"; gene_name "Lonp2"; gene_biotype "protein_coding"; transcript_biotype "circRNA"; oId "lv:circLonp2-1428-001"; tissue "lv";
8	ncSplice	exon	86665691	86665841	.	+	.	gene_id "ENSMUSG00000047866"; transcript_id "mmCircRNA-58"; exon_number "1" gene_name "Lonp2"; gene_biotype "protein_coding"; oId "lv:circLonp2-1428-001"; tissue "lv";
8	ncSplice	exon	86667713	86667839	.	+	.	gene_id "ENSMUSG00000047866"; transcript_id "mmCircRNA-58"; exon_number "2" gene_name "Lonp2"; gene_biotype "protein_coding"; oId "lv:circLonp2-1428-001"; tissue "lv";
8	ncSplice	exon	86672936	86673069	.	+	.	gene_id "ENSMUSG00000047866"; transcript_id "mmCircRNA-58"; exon_number "3" gene_name "Lonp2"; gene_biotype "protein_coding"; oId "lv:circLonp2-1428-001"; tissue "lv";
9	ncSplice	gene	122131893	122137601	.	+	.	gene_id "ENSMUSG00000038145"; gene_name "Snrk"; gene_source "ncSplice"; gene_biotype "protein_coding";
9	ncSplice	transcript	122131893	122137601	.	+	.	gene_id "ENSMUSG00000038145"; transcript_id "mmCircRNA-59"; gene_name "Snrk"; gene_biotype "protein_coding"; transcript_biotype "circRNA"; oId "lv:circSnrk-1439-005|ce:circSnrk-5531-003"; tissue "lv|ce";
9	ncSplice	exon	122131893	122131942	.	+	.	gene_id "ENSMUSG00000038145"; transcript_id "mmCircRNA-59"; exon_number "1" gene_name "Snrk"; gene_biotype "protein_coding"; oId "lv:circSnrk-1439-005|ce:circSnrk-5531-003"; tissue "lv|ce";
9	ncSplice	exon	122132628	122132750	.	+	.	gene_id "ENSMUSG00000038145"; transcript_id "mmCircRNA-59"; exon_number "2" gene_name "Snrk"; gene_biotype "protein_coding"; oId "lv:circSnrk-1439-005|ce:circSnrk-5531-003"; tissue "lv|ce";
9	ncSplice	exon	122136906	122137601	.	+	.	gene_id "ENSMUSG00000038145"; transcript_id "mmCircRNA-59"; exon_number "3" gene_name "Snrk"; gene_biotype "protein_coding"; oId "lv:circSnrk-1439-005|ce:circSnrk-5531-003"; tissue "lv|ce";
9	ncSplice	gene	55838120	55859918	.	-	.	gene_id "ENSMUSG00000034007"; gene_name "Scaper"; gene_source "ncSplice"; gene_biotype "protein_coding";
9	ncSplice	transcript	55838120	55859918	.	-	.	gene_id "ENSMUSG00000034007"; transcript_id "mmCircRNA-60"; gene_name "Scaper"; gene_biotype "protein_coding"; transcript_biotype "circRNA"; oId "lv:circScaper-1470-001|ce:circScaper-5648-001|ts:circScaper-5145-002"; tissue "lv|ce|ts";
9	ncSplice	exon	55838120	55838260	.	-	.	gene_id "ENSMUSG00000034007"; transcript_id "mmCircRNA-60"; exon_number "1" gene_name "Scaper"; gene_biotype "protein_coding"; oId "lv:circScaper-1470-001|ce:circScaper-5648-001|ts:circScaper-5145-002"; tissue "lv|ce|ts";
9	ncSplice	exon	55858081	55858192	.	-	.	gene_id "ENSMUSG00000034007"; transcript_id "mmCircRNA-60"; exon_number "2" gene_name "Scaper"; gene_biotype "protein_coding"; oId "lv:circScaper-1470-001|ce:circScaper-5648-001|ts:circScaper-5145-002"; tissue "lv|ce|ts";
9	ncSplice	exon	55858408	55858525	.	-	.	gene_id "ENSMUSG00000034007"; transcript_id "mmCircRNA-60"; exon_number "3" gene_name "Scaper"; gene_biotype "protein_coding"; oId "lv:circScaper-1470-001|ce:circScaper-5648-001|ts:circScaper-5145-002"; tissue "lv|ce|ts";
9	ncSplice	exon	55858999	55859074	.	-	.	gene_id "ENSMUSG00000034007"; transcript_id "mmCircRNA-60"; exon_number "4" gene_name "Scaper"; gene_biotype "protein_coding"; oId "lv:circScaper-1470-001|ce:circScaper-5648-001|ts:circScaper-5145-002"; tissue "lv|ce|ts";
9	ncSplice	exon	55859748	55859918	.	-	.	gene_id "ENSMUSG00000034007"; transcript_id "mmCircRNA-60"; exon_number "5" gene_name "Scaper"; gene_biotype "protein_coding"; oId "lv:circScaper-1470-001|ce:circScaper-5648-001|ts:circScaper-5145-002"; tissue "lv|ce|ts";
9	ncSplice	gene	66540062	66566903	.	-	.	gene_id "ENSMUSG00000032376"; gene_name "Usp3"; gene_source "ncSplice"; gene_biotype "protein_coding";
9	ncSplice	transcript	66540062	66566903	.	-	.	gene_id "ENSMUSG00000032376"; transcript_id "mmCircRNA-61"; gene_name "Usp3"; gene_biotype "protein_coding"; transcript_biotype "circRNA"; oId "lv:circUsp3-1492-009|ce:circUsp3-5721-005"; tissue "lv|ce";
9	ncSplice	exon	66540062	66540175	.	-	.	gene_id "ENSMUSG00000032376"; transcript_id "mmCircRNA-61"; exon_number "1" gene_name "Usp3"; gene_biotype "protein_coding"; oId "lv:circUsp3-1492-009|ce:circUsp3-5721-005"; tissue "lv|ce";
9	ncSplice	exon	66542513	66542626	.	-	.	gene_id "ENSMUSG00000032376"; transcript_id "mmCircRNA-61"; exon_number "2" gene_name "Usp3"; gene_biotype "protein_coding"; oId "lv:circUsp3-1492-009|ce:circUsp3-5721-005"; tissue "lv|ce";
9	ncSplice	exon	66543946	66544028	.	-	.	gene_id "ENSMUSG00000032376"; transcript_id "mmCircRNA-61"; exon_number "3" gene_name "Usp3"; gene_biotype "protein_coding"; oId "lv:circUsp3-1492-009|ce:circUsp3-5721-005"; tissue "lv|ce";
9	ncSplice	exon	66545744	66545825	.	-	.	gene_id "ENSMUSG00000032376"; transcript_id "mmCircRNA-61"; exon_number "4" gene_name "Usp3"; gene_biotype "protein_coding"; oId "lv:circUsp3-1492-009|ce:circUsp3-5721-005"; tissue "lv|ce";
9	ncSplice	exon	66547872	66547955	.	-	.	gene_id "ENSMUSG00000032376"; transcript_id "mmCircRNA-61"; exon_number "5" gene_name "Usp3"; gene_biotype "protein_coding"; oId "lv:circUsp3-1492-009|ce:circUsp3-5721-005"; tissue "lv|ce";
9	ncSplice	exon	66562554	66562685	.	-	.	gene_id "ENSMUSG00000032376"; transcript_id "mmCircRNA-61"; exon_number "6" gene_name "Usp3"; gene_biotype "protein_coding"; oId "lv:circUsp3-1492-009|ce:circUsp3-5721-005"; tissue "lv|ce";
9	ncSplice	exon	66566843	66566903	.	-	.	gene_id "ENSMUSG00000032376"; transcript_id "mmCircRNA-61"; exon_number "7" gene_name "Usp3"; gene_biotype "protein_coding"; oId "lv:circUsp3-1492-009|ce:circUsp3-5721-005"; tissue "lv|ce";
9	ncSplice	gene	83952524	83991822	.	+	.	gene_id "ENSMUSG00000032263"; gene_name "Bckdhb"; gene_source "ncSplice"; gene_biotype "protein_coding";
9	ncSplice	transcript	83952524	83991822	.	+	.	gene_id "ENSMUSG00000032263"; transcript_id "mmCircRNA-62"; gene_name "Bckdhb"; gene_biotype "protein_coding"; transcript_biotype "circRNA"; oId "lv:circBckdhb-1516-003"; tissue "lv";
9	ncSplice	exon	83952524	83952601	.	+	.	gene_id "ENSMUSG00000032263"; transcript_id "mmCircRNA-62"; exon_number "1" gene_name "Bckdhb"; gene_biotype "protein_coding"; oId "lv:circBckdhb-1516-003"; tissue "lv";
9	ncSplice	exon	83953713	83953781	.	+	.	gene_id "ENSMUSG00000032263"; transcript_id "mmCircRNA-62"; exon_number "2" gene_name "Bckdhb"; gene_biotype "protein_coding"; oId "lv:circBckdhb-1516-003"; tissue "lv";
9	ncSplice	exon	83988776	83988909	.	+	.	gene_id "ENSMUSG00000032263"; transcript_id "mmCircRNA-62"; exon_number "3" gene_name "Bckdhb"; gene_biotype "protein_coding"; oId "lv:circBckdhb-1516-003"; tissue "lv";
9	ncSplice	exon	83989141	83989296	.	+	.	gene_id "ENSMUSG00000032263"; transcript_id "mmCircRNA-62"; exon_number "4" gene_name "Bckdhb"; gene_biotype "protein_coding"; oId "lv:circBckdhb-1516-003"; tissue "lv";
9	ncSplice	exon	83991714	83991822	.	+	.	gene_id "ENSMUSG00000032263"; transcript_id "mmCircRNA-62"; exon_number "5" gene_name "Bckdhb"; gene_biotype "protein_coding"; oId "lv:circBckdhb-1516-003"; tissue "lv";
9	ncSplice	gene	83988776	84012619	.	+	.	gene_id "ENSMUSG00000032263"; gene_name "Bckdhb"; gene_source "ncSplice"; gene_biotype "protein_coding";
9	ncSplice	transcript	83988776	84012619	.	+	.	gene_id "ENSMUSG00000032263"; transcript_id "mmCircRNA-63"; gene_name "Bckdhb"; gene_biotype "protein_coding"; transcript_biotype "circRNA"; oId "lv:circBckdhb-1520-001|ce:circBckdhb-5785-001"; tissue "lv|ce";
9	ncSplice	exon	83988776	83988909	.	+	.	gene_id "ENSMUSG00000032263"; transcript_id "mmCircRNA-63"; exon_number "1" gene_name "Bckdhb"; gene_biotype "protein_coding"; oId "lv:circBckdhb-1520-001|ce:circBckdhb-5785-001"; tissue "lv|ce";
9	ncSplice	exon	83989141	83989296	.	+	.	gene_id "ENSMUSG00000032263"; transcript_id "mmCircRNA-63"; exon_number "2" gene_name "Bckdhb"; gene_biotype "protein_coding"; oId "lv:circBckdhb-1520-001|ce:circBckdhb-5785-001"; tissue "lv|ce";
9	ncSplice	exon	83991714	83991822	.	+	.	gene_id "ENSMUSG00000032263"; transcript_id "mmCircRNA-63"; exon_number "3" gene_name "Bckdhb"; gene_biotype "protein_coding"; oId "lv:circBckdhb-1520-001|ce:circBckdhb-5785-001"; tissue "lv|ce";
9	ncSplice	exon	84010254	84010351	.	+	.	gene_id "ENSMUSG00000032263"; transcript_id "mmCircRNA-63"; exon_number "4" gene_name "Bckdhb"; gene_biotype "protein_coding"; oId "lv:circBckdhb-1520-001|ce:circBckdhb-5785-001"; tissue "lv|ce";
9	ncSplice	exon	84012509	84012619	.	+	.	gene_id "ENSMUSG00000032263"; transcript_id "mmCircRNA-63"; exon_number "5" gene_name "Bckdhb"; gene_biotype "protein_coding"; oId "lv:circBckdhb-1520-001|ce:circBckdhb-5785-001"; tissue "lv|ce";
X	ncSplice	gene	50564813	50573351	.	-	.	gene_id "ENSMUSG00000085396"; gene_name "Firre"; gene_source "ncSplice"; gene_biotype "processed_transcript";
X	ncSplice	transcript	50564813	50573351	.	-	.	gene_id "ENSMUSG00000085396"; transcript_id "mmCircRNA-64"; gene_name "Firre"; gene_biotype "processed_transcript"; transcript_biotype "circRNA"; oId "lv:circFirre-1546-002"; tissue "lv";
X	ncSplice	exon	50564813	50564967	.	-	.	gene_id "ENSMUSG00000085396"; transcript_id "mmCircRNA-64"; exon_number "1" gene_name "Firre"; gene_biotype "processed_transcript"; oId "lv:circFirre-1546-002"; tissue "lv";
X	ncSplice	exon	50567540	50567693	.	-	.	gene_id "ENSMUSG00000085396"; transcript_id "mmCircRNA-64"; exon_number "2" gene_name "Firre"; gene_biotype "processed_transcript"; oId "lv:circFirre-1546-002"; tissue "lv";
X	ncSplice	exon	50569277	50570291	.	-	.	gene_id "ENSMUSG00000085396"; transcript_id "mmCircRNA-64"; exon_number "3" gene_name "Firre"; gene_biotype "processed_transcript"; oId "lv:circFirre-1546-002"; tissue "lv";
X	ncSplice	exon	50573015	50573144	.	-	.	gene_id "ENSMUSG00000085396"; transcript_id "mmCircRNA-64"; exon_number "4" gene_name "Firre"; gene_biotype "processed_transcript"; oId "lv:circFirre-1546-002"; tissue "lv";
X	ncSplice	exon	50573224	50573351	.	-	.	gene_id "ENSMUSG00000085396"; transcript_id "mmCircRNA-64"; exon_number "5" gene_name "Firre"; gene_biotype "processed_transcript"; oId "lv:circFirre-1546-002"; tissue "lv";
12	ncSplice	gene	103819432	103855250	.	-	.	gene_id "ENSMUSG00000090555"; gene_name "Gm8893"; gene_source "ncSplice"; gene_biotype "unprocessed_pseudogene";
12	ncSplice	transcript	103819432	103855250	.	-	.	gene_id "ENSMUSG00000090555"; transcript_id "mmCircRNA-65"; gene_name "Gm8893"; gene_biotype "unprocessed_pseudogene"; transcript_biotype "circRNA"; oId "lv:circGm8893-1624-001"; tissue "lv";
12	ncSplice	exon	103819432	103855250	.	-	.	gene_id "ENSMUSG00000090555"; transcript_id "mmCircRNA-65"; exon_number "1" gene_name "Gm8893"; gene_biotype "unprocessed_pseudogene"; oId "lv:circGm8893-1624-001"; tissue "lv";
12	ncSplice	gene	103819536	103855350	.	-	.	gene_id "ENSMUSG00000090555"; gene_name "Gm8893"; gene_source "ncSplice"; gene_biotype "unprocessed_pseudogene";
12	ncSplice	transcript	103819536	103855350	.	-	.	gene_id "ENSMUSG00000090555"; transcript_id "mmCircRNA-66"; gene_name "Gm8893"; gene_biotype "unprocessed_pseudogene"; transcript_biotype "circRNA"; oId "lv:circGm8893-1625-001"; tissue "lv";
12	ncSplice	exon	103819536	103855350	.	-	.	gene_id "ENSMUSG00000090555"; transcript_id "mmCircRNA-66"; exon_number "1" gene_name "Gm8893"; gene_biotype "unprocessed_pseudogene"; oId "lv:circGm8893-1625-001"; tissue "lv";
12	ncSplice	gene	103859029	103900360	.	-	.	gene_id "ENSMUSG00000066366"; gene_name "Serpina1a"; gene_source "ncSplice"; gene_biotype "protein_coding";
12	ncSplice	transcript	103859029	103900360	.	-	.	gene_id "ENSMUSG00000066366"; transcript_id "mmCircRNA-67"; gene_name "Serpina1a"; gene_biotype "protein_coding"; transcript_biotype "circRNA"; oId "lv:circSerpina1a-1626-001"; tissue "lv";
12	ncSplice	exon	103859029	103900360	.	-	.	gene_id "ENSMUSG00000066366"; transcript_id "mmCircRNA-67"; exon_number "1" gene_name "Serpina1a"; gene_biotype "protein_coding"; oId "lv:circSerpina1a-1626-001"; tissue "lv";
12	ncSplice	gene	69159445	69159578	.	+	.	gene_id "ENSMUSG00000099021"; gene_name "Gm22405"; gene_source "ncSplice"; gene_biotype "misc_RNA";
12	ncSplice	transcript	69159445	69159578	.	+	.	gene_id "ENSMUSG00000099021"; transcript_id "mmCircRNA-68"; gene_name "Gm22405"; gene_biotype "misc_RNA"; transcript_biotype "circRNA"; oId "lv:circGm22405-1638-001"; tissue "lv";
12	ncSplice	exon	69159445	69159578	.	+	.	gene_id "ENSMUSG00000099021"; transcript_id "mmCircRNA-68"; exon_number "1" gene_name "Gm22405"; gene_biotype "misc_RNA"; oId "lv:circGm22405-1638-001"; tissue "lv";
12	ncSplice	gene	69159453	69159584	.	+	.	gene_id "ENSMUSG00000099021"; gene_name "Gm22405"; gene_source "ncSplice"; gene_biotype "misc_RNA";
12	ncSplice	transcript	69159453	69159584	.	+	.	gene_id "ENSMUSG00000099021"; transcript_id "mmCircRNA-69"; gene_name "Gm22405"; gene_biotype "misc_RNA"; transcript_biotype "circRNA"; oId "lv:circGm22405-1639-001"; tissue "lv";
12	ncSplice	exon	69159453	69159584	.	+	.	gene_id "ENSMUSG00000099021"; transcript_id "mmCircRNA-69"; exon_number "1" gene_name "Gm22405"; gene_biotype "misc_RNA"; oId "lv:circGm22405-1639-001"; tissue "lv";
12	ncSplice	gene	69361187	69361353	.	-	.	gene_id "ENSMUSG00000099250"; gene_name "Gm26191"; gene_source "ncSplice"; gene_biotype "misc_RNA";
12	ncSplice	transcript	69361187	69361353	.	-	.	gene_id "ENSMUSG00000099250"; transcript_id "mmCircRNA-70"; gene_name "Gm26191"; gene_biotype "misc_RNA"; transcript_biotype "circRNA"; oId "lv:circGm26191-1641-001"; tissue "lv";
12	ncSplice	exon	69361187	69361353	.	-	.	gene_id "ENSMUSG00000099250"; transcript_id "mmCircRNA-70"; exon_number "1" gene_name "Gm26191"; gene_biotype "misc_RNA"; oId "lv:circGm26191-1641-001"; tissue "lv";
12	ncSplice	gene	69361192	69361323	.	-	.	gene_id "ENSMUSG00000099250"; gene_name "Gm26191"; gene_source "ncSplice"; gene_biotype "misc_RNA";
12	ncSplice	transcript	69361192	69361323	.	-	.	gene_id "ENSMUSG00000099250"; transcript_id "mmCircRNA-71"; gene_name "Gm26191"; gene_biotype "misc_RNA"; transcript_biotype "circRNA"; oId "lv:circGm26191-1642-001"; tissue "lv";
12	ncSplice	exon	69361192	69361323	.	-	.	gene_id "ENSMUSG00000099250"; transcript_id "mmCircRNA-71"; exon_number "1" gene_name "Gm26191"; gene_biotype "misc_RNA"; oId "lv:circGm26191-1642-001"; tissue "lv";
12	ncSplice	gene	69361198	69361331	.	-	.	gene_id "ENSMUSG00000099250"; gene_name "Gm26191"; gene_source "ncSplice"; gene_biotype "misc_RNA";
12	ncSplice	transcript	69361198	69361331	.	-	.	gene_id "ENSMUSG00000099250"; transcript_id "mmCircRNA-72"; gene_name "Gm26191"; gene_biotype "misc_RNA"; transcript_biotype "circRNA"; oId "lv:circGm26191-1643-001"; tissue "lv";
12	ncSplice	exon	69361198	69361331	.	-	.	gene_id "ENSMUSG00000099250"; transcript_id "mmCircRNA-72"; exon_number "1" gene_name "Gm26191"; gene_biotype "misc_RNA"; oId "lv:circGm26191-1643-001"; tissue "lv";
12	ncSplice	gene	69361212	69361331	.	-	.	gene_id "ENSMUSG00000099250"; gene_name "Gm26191"; gene_source "ncSplice"; gene_biotype "misc_RNA";
12	ncSplice	transcript	69361212	69361331	.	-	.	gene_id "ENSMUSG00000099250"; transcript_id "mmCircRNA-73"; gene_name "Gm26191"; gene_biotype "misc_RNA"; transcript_biotype "circRNA"; oId "lv:circGm26191-1644-001"; tissue "lv";
12	ncSplice	exon	69361212	69361331	.	-	.	gene_id "ENSMUSG00000099250"; transcript_id "mmCircRNA-73"; exon_number "1" gene_name "Gm26191"; gene_biotype "misc_RNA"; oId "lv:circGm26191-1644-001"; tissue "lv";
12	ncSplice	gene	69361308	69361427	.	-	.	gene_id "ENSMUSG00000099250"; gene_name "Gm26191"; gene_source "ncSplice"; gene_biotype "misc_RNA";
12	ncSplice	transcript	69361308	69361427	.	-	.	gene_id "ENSMUSG00000099250"; transcript_id "mmCircRNA-74"; gene_name "Gm26191"; gene_biotype "misc_RNA"; transcript_biotype "circRNA"; oId "lv:circGm26191-1646-001"; tissue "lv";
12	ncSplice	exon	69361308	69361427	.	-	.	gene_id "ENSMUSG00000099250"; transcript_id "mmCircRNA-74"; exon_number "1" gene_name "Gm26191"; gene_biotype "misc_RNA"; oId "lv:circGm26191-1646-001"; tissue "lv";
13	ncSplice	gene	35815909	35816575	.	+	.	gene_id "ENSMUSG00000059288"; gene_name "Cdyl"; gene_source "ncSplice"; gene_biotype "protein_coding";
13	ncSplice	transcript	35815909	35816575	.	+	.	gene_id "ENSMUSG00000059288"; transcript_id "mmCircRNA-75"; gene_name "Cdyl"; gene_biotype "protein_coding"; transcript_biotype "circRNA"; oId "lv:circCdyl-1658-001|ce:circCdyl-6430-001|ts:circCdyl-5618-001"; tissue "lv|ce|ts";
13	ncSplice	exon	35815909	35816575	.	+	.	gene_id "ENSMUSG00000059288"; transcript_id "mmCircRNA-75"; exon_number "1" gene_name "Cdyl"; gene_biotype "protein_coding"; oId "lv:circCdyl-1658-001|ce:circCdyl-6430-001|ts:circCdyl-5618-001"; tissue "lv|ce|ts";
17	ncSplice	gene	6137211	6139156	.	+	.	gene_id "ENSMUSG00000034377"; gene_name "Tulp4"; gene_source "ncSplice"; gene_biotype "protein_coding";
17	ncSplice	transcript	6137211	6139156	.	+	.	gene_id "ENSMUSG00000034377"; transcript_id "mmCircRNA-76"; gene_name "Tulp4"; gene_biotype "protein_coding"; transcript_biotype "circRNA"; oId "lv:circTulp4-1712-001|ce:circTulp4-6708-001|ts:circTulp4-5794-001"; tissue "lv|ce|ts";
17	ncSplice	exon	6137211	6139156	.	+	.	gene_id "ENSMUSG00000034377"; transcript_id "mmCircRNA-76"; exon_number "1" gene_name "Tulp4"; gene_biotype "protein_coding"; oId "lv:circTulp4-1712-001|ce:circTulp4-6708-001|ts:circTulp4-5794-001"; tissue "lv|ce|ts";
19	ncSplice	gene	25409086	25411764	.	+	.	gene_id "ENSMUSG00000032702"; gene_name "Kank1"; gene_source "ncSplice"; gene_biotype "protein_coding";
19	ncSplice	transcript	25409086	25411764	.	+	.	gene_id "ENSMUSG00000032702"; transcript_id "mmCircRNA-77"; gene_name "Kank1"; gene_biotype "protein_coding"; transcript_biotype "circRNA"; oId "lv:circKank1-1721-001"; tissue "lv";
19	ncSplice	exon	25409086	25411764	.	+	.	gene_id "ENSMUSG00000032702"; transcript_id "mmCircRNA-77"; exon_number "1" gene_name "Kank1"; gene_biotype "protein_coding"; oId "lv:circKank1-1721-001"; tissue "lv";
4	ncSplice	gene	43492793	43492933	.	-	.	gene_id "ENSMUSG00000088088"; gene_name "Rmrp"; gene_source "ncSplice"; gene_biotype "misc_RNA";
4	ncSplice	transcript	43492793	43492933	.	-	.	gene_id "ENSMUSG00000088088"; transcript_id "mmCircRNA-78"; gene_name "Rmrp"; gene_biotype "misc_RNA"; transcript_biotype "circRNA"; oId "lv:circRmrp-1792-001|ce:circRmrp-7144-001|ts:circRmrp-6040-001"; tissue "lv|ce|ts";
4	ncSplice	exon	43492793	43492933	.	-	.	gene_id "ENSMUSG00000088088"; transcript_id "mmCircRNA-78"; exon_number "1" gene_name "Rmrp"; gene_biotype "misc_RNA"; oId "lv:circRmrp-1792-001|ce:circRmrp-7144-001|ts:circRmrp-6040-001"; tissue "lv|ce|ts";
4	ncSplice	gene	43492793	43492960	.	-	.	gene_id "ENSMUSG00000088088"; gene_name "Rmrp"; gene_source "ncSplice"; gene_biotype "misc_RNA";
4	ncSplice	transcript	43492793	43492960	.	-	.	gene_id "ENSMUSG00000088088"; transcript_id "mmCircRNA-79"; gene_name "Rmrp"; gene_biotype "misc_RNA"; transcript_biotype "circRNA"; oId "lv:circRmrp-1794-001"; tissue "lv";
4	ncSplice	exon	43492793	43492960	.	-	.	gene_id "ENSMUSG00000088088"; transcript_id "mmCircRNA-79"; exon_number "1" gene_name "Rmrp"; gene_biotype "misc_RNA"; oId "lv:circRmrp-1794-001"; tissue "lv";
4	ncSplice	gene	43492795	43492948	.	-	.	gene_id "ENSMUSG00000088088"; gene_name "Rmrp"; gene_source "ncSplice"; gene_biotype "misc_RNA";
4	ncSplice	transcript	43492795	43492948	.	-	.	gene_id "ENSMUSG00000088088"; transcript_id "mmCircRNA-80"; gene_name "Rmrp"; gene_biotype "misc_RNA"; transcript_biotype "circRNA"; oId "lv:circRmrp-1796-001|ce:circRmrp-7147-001|ts:circRmrp-6043-001"; tissue "lv|ce|ts";
4	ncSplice	exon	43492795	43492948	.	-	.	gene_id "ENSMUSG00000088088"; transcript_id "mmCircRNA-80"; exon_number "1" gene_name "Rmrp"; gene_biotype "misc_RNA"; oId "lv:circRmrp-1796-001|ce:circRmrp-7147-001|ts:circRmrp-6043-001"; tissue "lv|ce|ts";
4	ncSplice	gene	43492795	43492950	.	-	.	gene_id "ENSMUSG00000088088"; gene_name "Rmrp"; gene_source "ncSplice"; gene_biotype "misc_RNA";
4	ncSplice	transcript	43492795	43492950	.	-	.	gene_id "ENSMUSG00000088088"; transcript_id "mmCircRNA-81"; gene_name "Rmrp"; gene_biotype "misc_RNA"; transcript_biotype "circRNA"; oId "lv:circRmrp-1797-001|ce:circRmrp-7148-001|ts:circRmrp-6044-001"; tissue "lv|ce|ts";
4	ncSplice	exon	43492795	43492950	.	-	.	gene_id "ENSMUSG00000088088"; transcript_id "mmCircRNA-81"; exon_number "1" gene_name "Rmrp"; gene_biotype "misc_RNA"; oId "lv:circRmrp-1797-001|ce:circRmrp-7148-001|ts:circRmrp-6044-001"; tissue "lv|ce|ts";
5	ncSplice	gene	110755397	110756766	.	-	.	gene_id "ENSMUSG00000029505"; gene_name "Ep400"; gene_source "ncSplice"; gene_biotype "protein_coding";
5	ncSplice	transcript	110755397	110756766	.	-	.	gene_id "ENSMUSG00000029505"; transcript_id "mmCircRNA-82"; gene_name "Ep400"; gene_biotype "protein_coding"; transcript_biotype "circRNA"; oId "lv:circEp400-1811-001|ce:circEp400-7191-001|ts:circEp400-6088-001"; tissue "lv|ce|ts";
5	ncSplice	exon	110755397	110756766	.	-	.	gene_id "ENSMUSG00000029505"; transcript_id "mmCircRNA-82"; exon_number "1" gene_name "Ep400"; gene_biotype "protein_coding"; oId "lv:circEp400-1811-001|ce:circEp400-7191-001|ts:circEp400-6088-001"; tissue "lv|ce|ts";
5	ncSplice	gene	118593333	118593570	.	+	.	gene_id "ENSMUSG00000018076"; gene_name "Med13l"; gene_source "ncSplice"; gene_biotype "protein_coding";
5	ncSplice	transcript	118593333	118593570	.	+	.	gene_id "ENSMUSG00000018076"; transcript_id "mmCircRNA-83"; gene_name "Med13l"; gene_biotype "protein_coding"; transcript_biotype "circRNA"; oId "lv:circMed13l-1812-001|ce:circMed13l-7199-001"; tissue "lv|ce";
5	ncSplice	exon	118593333	118593570	.	+	.	gene_id "ENSMUSG00000018076"; transcript_id "mmCircRNA-83"; exon_number "1" gene_name "Med13l"; gene_biotype "protein_coding"; oId "lv:circMed13l-1812-001|ce:circMed13l-7199-001"; tissue "lv|ce";
6	ncSplice	gene	141663578	141672313	.	+	.	gene_id "ENSMUSG00000030236"; gene_name "Slco1b2"; gene_source "ncSplice"; gene_biotype "protein_coding";
6	ncSplice	transcript	141663578	141672313	.	+	.	gene_id "ENSMUSG00000030236"; transcript_id "mmCircRNA-84"; gene_name "Slco1b2"; gene_biotype "protein_coding"; transcript_biotype "circRNA"; oId "lv:circSlco1b2-1839-001"; tissue "lv";
6	ncSplice	exon	141663578	141672313	.	+	.	gene_id "ENSMUSG00000030236"; transcript_id "mmCircRNA-84"; exon_number "1" gene_name "Slco1b2"; gene_biotype "protein_coding"; oId "lv:circSlco1b2-1839-001"; tissue "lv";
8	ncSplice	gene	84771784	84772315	.	-	.	gene_id "ENSMUSG00000001911"; gene_name "Nfix"; gene_source "ncSplice"; gene_biotype "protein_coding";
8	ncSplice	transcript	84771784	84772315	.	-	.	gene_id "ENSMUSG00000001911"; transcript_id "mmCircRNA-85"; gene_name "Nfix"; gene_biotype "protein_coding"; transcript_biotype "circRNA"; oId "lv:circNfix-1879-001|ce:circNfix-7947-001"; tissue "lv|ce";
8	ncSplice	exon	84771784	84772315	.	-	.	gene_id "ENSMUSG00000001911"; transcript_id "mmCircRNA-85"; exon_number "1" gene_name "Nfix"; gene_biotype "protein_coding"; oId "lv:circNfix-1879-001|ce:circNfix-7947-001"; tissue "lv|ce";
9	ncSplice	gene	123307684	123307916	.	-	.	gene_id "ENSMUSG00000058492"; gene_name "Scp2-ps2"; gene_source "ncSplice"; gene_biotype "processed_pseudogene";
9	ncSplice	transcript	123307684	123307916	.	-	.	gene_id "ENSMUSG00000058492"; transcript_id "mmCircRNA-86"; gene_name "Scp2-ps2"; gene_biotype "processed_pseudogene"; transcript_biotype "circRNA"; oId "lv:circScp2-ps2-1890-001"; tissue "lv";
9	ncSplice	exon	123307684	123307916	.	-	.	gene_id "ENSMUSG00000058492"; transcript_id "mmCircRNA-86"; exon_number "1" gene_name "Scp2-ps2"; gene_biotype "processed_pseudogene"; oId "lv:circScp2-ps2-1890-001"; tissue "lv";
9	ncSplice	gene	65794622	65795495	.	-	.	gene_id "ENSMUSG00000040524"; gene_name "Zfp609"; gene_source "ncSplice"; gene_biotype "protein_coding";
9	ncSplice	transcript	65794622	65795495	.	-	.	gene_id "ENSMUSG00000040524"; transcript_id "mmCircRNA-87"; gene_name "Zfp609"; gene_biotype "protein_coding"; transcript_biotype "circRNA"; oId "lv:circZfp609-1900-001|ce:circZfp609-8052-001|ts:circZfp609-6345-001"; tissue "lv|ce|ts";
9	ncSplice	exon	65794622	65795495	.	-	.	gene_id "ENSMUSG00000040524"; transcript_id "mmCircRNA-87"; exon_number "1" gene_name "Zfp609"; gene_biotype "protein_coding"; oId "lv:circZfp609-1900-001|ce:circZfp609-8052-001|ts:circZfp609-6345-001"; tissue "lv|ce|ts";
10	ncSplice	gene	105303594	105323637	.	-	.	gene_id "ENSMUSG00000036019"; gene_name "Tmtc2"; gene_source "ncSplice"; gene_biotype "protein_coding";
10	ncSplice	transcript	105303594	105323637	.	-	.	gene_id "ENSMUSG00000036019"; transcript_id "mmCircRNA-88"; gene_name "Tmtc2"; gene_biotype "protein_coding"; transcript_biotype "circRNA"; oId "ce:circTmtc2-2-001"; tissue "ce";
10	ncSplice	exon	105303594	105303715	.	-	.	gene_id "ENSMUSG00000036019"; transcript_id "mmCircRNA-88"; exon_number "1" gene_name "Tmtc2"; gene_biotype "protein_coding"; oId "ce:circTmtc2-2-001"; tissue "ce";
10	ncSplice	exon	105321396	105321474	.	-	.	gene_id "ENSMUSG00000036019"; transcript_id "mmCircRNA-88"; exon_number "2" gene_name "Tmtc2"; gene_biotype "protein_coding"; oId "ce:circTmtc2-2-001"; tissue "ce";
10	ncSplice	exon	105322862	105323046	.	-	.	gene_id "ENSMUSG00000036019"; transcript_id "mmCircRNA-88"; exon_number "3" gene_name "Tmtc2"; gene_biotype "protein_coding"; oId "ce:circTmtc2-2-001"; tissue "ce";
10	ncSplice	exon	105323552	105323637	.	-	.	gene_id "ENSMUSG00000036019"; transcript_id "mmCircRNA-88"; exon_number "4" gene_name "Tmtc2"; gene_biotype "protein_coding"; oId "ce:circTmtc2-2-001"; tissue "ce";
10	ncSplice	gene	10733159	10746791	.	-	.	gene_id "ENSMUSG00000019828"; gene_name "Grm1"; gene_source "ncSplice"; gene_biotype "protein_coding";
10	ncSplice	transcript	10733159	10746791	.	-	.	gene_id "ENSMUSG00000019828"; transcript_id "mmCircRNA-89"; gene_name "Grm1"; gene_biotype "protein_coding"; transcript_biotype "circRNA"; oId "ce:circGrm1-10-001"; tissue "ce";
10	ncSplice	exon	10733159	10733285	.	-	.	gene_id "ENSMUSG00000019828"; transcript_id "mmCircRNA-89"; exon_number "1" gene_name "Grm1"; gene_biotype "protein_coding"; oId "ce:circGrm1-10-001"; tissue "ce";
10	ncSplice	exon	10741436	10741604	.	-	.	gene_id "ENSMUSG00000019828"; transcript_id "mmCircRNA-89"; exon_number "2" gene_name "Grm1"; gene_biotype "protein_coding"; oId "ce:circGrm1-10-001"; tissue "ce";
10	ncSplice	exon	10746545	10746791	.	-	.	gene_id "ENSMUSG00000019828"; transcript_id "mmCircRNA-89"; exon_number "3" gene_name "Grm1"; gene_biotype "protein_coding"; oId "ce:circGrm1-10-001"; tissue "ce";
10	ncSplice	gene	114444679	114487006	.	-	.	gene_id "ENSMUSG00000050663"; gene_name "Trhde"; gene_source "ncSplice"; gene_biotype "protein_coding";
10	ncSplice	transcript	114444679	114487006	.	-	.	gene_id "ENSMUSG00000050663"; transcript_id "mmCircRNA-90"; gene_name "Trhde"; gene_biotype "protein_coding"; transcript_biotype "circRNA"; oId "ce:circTrhde-25-001"; tissue "ce";
10	ncSplice	exon	114444679	114444786	.	-	.	gene_id "ENSMUSG00000050663"; transcript_id "mmCircRNA-90"; exon_number "1" gene_name "Trhde"; gene_biotype "protein_coding"; oId "ce:circTrhde-25-001"; tissue "ce";
10	ncSplice	exon	114446136	114446233	.	-	.	gene_id "ENSMUSG00000050663"; transcript_id "mmCircRNA-90"; exon_number "2" gene_name "Trhde"; gene_biotype "protein_coding"; oId "ce:circTrhde-25-001"; tissue "ce";
10	ncSplice	exon	114448240	114448387	.	-	.	gene_id "ENSMUSG00000050663"; transcript_id "mmCircRNA-90"; exon_number "3" gene_name "Trhde"; gene_biotype "protein_coding"; oId "ce:circTrhde-25-001"; tissue "ce";
10	ncSplice	exon	114486706	114486761	.	-	.	gene_id "ENSMUSG00000050663"; transcript_id "mmCircRNA-90"; exon_number "4" gene_name "Trhde"; gene_biotype "protein_coding"; oId "ce:circTrhde-25-001"; tissue "ce";
10	ncSplice	exon	114486873	114487006	.	-	.	gene_id "ENSMUSG00000050663"; transcript_id "mmCircRNA-90"; exon_number "5" gene_name "Trhde"; gene_biotype "protein_coding"; oId "ce:circTrhde-25-001"; tissue "ce";
10	ncSplice	gene	114486706	114518196	.	-	.	gene_id "ENSMUSG00000050663"; gene_name "Trhde"; gene_source "ncSplice"; gene_biotype "protein_coding";
10	ncSplice	transcript	114486706	114518196	.	-	.	gene_id "ENSMUSG00000050663"; transcript_id "mmCircRNA-91"; gene_name "Trhde"; gene_biotype "protein_coding"; transcript_biotype "circRNA"; oId "ce:circTrhde-28-001"; tissue "ce";
10	ncSplice	exon	114486706	114486761	.	-	.	gene_id "ENSMUSG00000050663"; transcript_id "mmCircRNA-91"; exon_number "1" gene_name "Trhde"; gene_biotype "protein_coding"; oId "ce:circTrhde-28-001"; tissue "ce";
10	ncSplice	exon	114486873	114487006	.	-	.	gene_id "ENSMUSG00000050663"; transcript_id "mmCircRNA-91"; exon_number "2" gene_name "Trhde"; gene_biotype "protein_coding"; oId "ce:circTrhde-28-001"; tissue "ce";
10	ncSplice	exon	114498769	114498857	.	-	.	gene_id "ENSMUSG00000050663"; transcript_id "mmCircRNA-91"; exon_number "3" gene_name "Trhde"; gene_biotype "protein_coding"; oId "ce:circTrhde-28-001"; tissue "ce";
10	ncSplice	exon	114502994	114503181	.	-	.	gene_id "ENSMUSG00000050663"; transcript_id "mmCircRNA-91"; exon_number "4" gene_name "Trhde"; gene_biotype "protein_coding"; oId "ce:circTrhde-28-001"; tissue "ce";
10	ncSplice	exon	114504177	114504242	.	-	.	gene_id "ENSMUSG00000050663"; transcript_id "mmCircRNA-91"; exon_number "5" gene_name "Trhde"; gene_biotype "protein_coding"; oId "ce:circTrhde-28-001"; tissue "ce";
10	ncSplice	exon	114518131	114518196	.	-	.	gene_id "ENSMUSG00000050663"; transcript_id "mmCircRNA-91"; exon_number "6" gene_name "Trhde"; gene_biotype "protein_coding"; oId "ce:circTrhde-28-001"; tissue "ce";
10	ncSplice	gene	116177718	116188468	.	+	.	gene_id "ENSMUSG00000020151"; gene_name "Ptprr"; gene_source "ncSplice"; gene_biotype "protein_coding";
10	ncSplice	transcript	116177718	116188468	.	+	.	gene_id "ENSMUSG00000020151"; transcript_id "mmCircRNA-92"; gene_name "Ptprr"; gene_biotype "protein_coding"; transcript_biotype "circRNA"; oId "ce:circPtprr-35-001"; tissue "ce";
10	ncSplice	exon	116177718	116177828	.	+	.	gene_id "ENSMUSG00000020151"; transcript_id "mmCircRNA-92"; exon_number "1" gene_name "Ptprr"; gene_biotype "protein_coding"; oId "ce:circPtprr-35-001"; tissue "ce";
10	ncSplice	exon	116188200	116188468	.	+	.	gene_id "ENSMUSG00000020151"; transcript_id "mmCircRNA-92"; exon_number "2" gene_name "Ptprr"; gene_biotype "protein_coding"; oId "ce:circPtprr-35-001"; tissue "ce";
10	ncSplice	gene	116517317	116549175	.	-	.	gene_id "ENSMUSG00000020166"; gene_name "Cnot2"; gene_source "ncSplice"; gene_biotype "protein_coding";
10	ncSplice	transcript	116517317	116549175	.	-	.	gene_id "ENSMUSG00000020166"; transcript_id "mmCircRNA-93"; gene_name "Cnot2"; gene_biotype "protein_coding"; transcript_biotype "circRNA"; oId "ce:circCnot2-38-001"; tissue "ce";
10	ncSplice	exon	116517317	116517383	.	-	.	gene_id "ENSMUSG00000020166"; transcript_id "mmCircRNA-93"; exon_number "1" gene_name "Cnot2"; gene_biotype "protein_coding"; oId "ce:circCnot2-38-001"; tissue "ce";
10	ncSplice	exon	116527827	116527949	.	-	.	gene_id "ENSMUSG00000020166"; transcript_id "mmCircRNA-93"; exon_number "2" gene_name "Cnot2"; gene_biotype "protein_coding"; oId "ce:circCnot2-38-001"; tissue "ce";
10	ncSplice	exon	116537221	116537278	.	-	.	gene_id "ENSMUSG00000020166"; transcript_id "mmCircRNA-93"; exon_number "3" gene_name "Cnot2"; gene_biotype "protein_coding"; oId "ce:circCnot2-38-001"; tissue "ce";
10	ncSplice	exon	116549033	116549175	.	-	.	gene_id "ENSMUSG00000020166"; transcript_id "mmCircRNA-93"; exon_number "4" gene_name "Cnot2"; gene_biotype "protein_coding"; oId "ce:circCnot2-38-001"; tissue "ce";
10	ncSplice	gene	116527827	116549175	.	-	.	gene_id "ENSMUSG00000020166"; gene_name "Cnot2"; gene_source "ncSplice"; gene_biotype "protein_coding";
10	ncSplice	transcript	116527827	116549175	.	-	.	gene_id "ENSMUSG00000020166"; transcript_id "mmCircRNA-94"; gene_name "Cnot2"; gene_biotype "protein_coding"; transcript_biotype "circRNA"; oId "ce:circCnot2-39-001"; tissue "ce";
10	ncSplice	exon	116527827	116527949	.	-	.	gene_id "ENSMUSG00000020166"; transcript_id "mmCircRNA-94"; exon_number "1" gene_name "Cnot2"; gene_biotype "protein_coding"; oId "ce:circCnot2-39-001"; tissue "ce";
10	ncSplice	exon	116537221	116537278	.	-	.	gene_id "ENSMUSG00000020166"; transcript_id "mmCircRNA-94"; exon_number "2" gene_name "Cnot2"; gene_biotype "protein_coding"; oId "ce:circCnot2-39-001"; tissue "ce";
10	ncSplice	exon	116549033	116549175	.	-	.	gene_id "ENSMUSG00000020166"; transcript_id "mmCircRNA-94"; exon_number "3" gene_name "Cnot2"; gene_biotype "protein_coding"; oId "ce:circCnot2-39-001"; tissue "ce";
10	ncSplice	gene	117355935	117367988	.	-	.	gene_id "ENSMUSG00000055531"; gene_name "Cpsf6"; gene_source "ncSplice"; gene_biotype "protein_coding";
10	ncSplice	transcript	117355935	117367988	.	-	.	gene_id "ENSMUSG00000055531"; transcript_id "mmCircRNA-95"; gene_name "Cpsf6"; gene_biotype "protein_coding"; transcript_biotype "circRNA"; oId "ce:circCpsf6-43-002|ts:circCpsf6-27-002"; tissue "ce|ts";
10	ncSplice	exon	117355935	117356127	.	-	.	gene_id "ENSMUSG00000055531"; transcript_id "mmCircRNA-95"; exon_number "1" gene_name "Cpsf6"; gene_biotype "protein_coding"; oId "ce:circCpsf6-43-002|ts:circCpsf6-27-002"; tissue "ce|ts";
10	ncSplice	exon	117358993	117359146	.	-	.	gene_id "ENSMUSG00000055531"; transcript_id "mmCircRNA-95"; exon_number "2" gene_name "Cpsf6"; gene_biotype "protein_coding"; oId "ce:circCpsf6-43-002|ts:circCpsf6-27-002"; tissue "ce|ts";
10	ncSplice	exon	117360440	117360555	.	-	.	gene_id "ENSMUSG00000055531"; transcript_id "mmCircRNA-95"; exon_number "3" gene_name "Cpsf6"; gene_biotype "protein_coding"; oId "ce:circCpsf6-43-002|ts:circCpsf6-27-002"; tissue "ce|ts";
10	ncSplice	exon	117360856	117361360	.	-	.	gene_id "ENSMUSG00000055531"; transcript_id "mmCircRNA-95"; exon_number "4" gene_name "Cpsf6"; gene_biotype "protein_coding"; oId "ce:circCpsf6-43-002|ts:circCpsf6-27-002"; tissue "ce|ts";
10	ncSplice	exon	117362014	117362187	.	-	.	gene_id "ENSMUSG00000055531"; transcript_id "mmCircRNA-95"; exon_number "5" gene_name "Cpsf6"; gene_biotype "protein_coding"; oId "ce:circCpsf6-43-002|ts:circCpsf6-27-002"; tissue "ce|ts";
10	ncSplice	exon	117362975	117363120	.	-	.	gene_id "ENSMUSG00000055531"; transcript_id "mmCircRNA-95"; exon_number "6" gene_name "Cpsf6"; gene_biotype "protein_coding"; oId "ce:circCpsf6-43-002|ts:circCpsf6-27-002"; tissue "ce|ts";
10	ncSplice	exon	117366081	117366184	.	-	.	gene_id "ENSMUSG00000055531"; transcript_id "mmCircRNA-95"; exon_number "7" gene_name "Cpsf6"; gene_biotype "protein_coding"; oId "ce:circCpsf6-43-002|ts:circCpsf6-27-002"; tissue "ce|ts";
10	ncSplice	exon	117367779	117367988	.	-	.	gene_id "ENSMUSG00000055531"; transcript_id "mmCircRNA-95"; exon_number "8" gene_name "Cpsf6"; gene_biotype "protein_coding"; oId "ce:circCpsf6-43-002|ts:circCpsf6-27-002"; tissue "ce|ts";
10	ncSplice	gene	119929901	119945171	.	+	.	gene_id "ENSMUSG00000034813"; gene_name "Grip1"; gene_source "ncSplice"; gene_biotype "protein_coding";
10	ncSplice	transcript	119929901	119945171	.	+	.	gene_id "ENSMUSG00000034813"; transcript_id "mmCircRNA-96"; gene_name "Grip1"; gene_biotype "protein_coding"; transcript_biotype "circRNA"; oId "ce:circGrip1-46-001"; tissue "ce";
10	ncSplice	exon	119929901	119930036	.	+	.	gene_id "ENSMUSG00000034813"; transcript_id "mmCircRNA-96"; exon_number "1" gene_name "Grip1"; gene_biotype "protein_coding"; oId "ce:circGrip1-46-001"; tissue "ce";
10	ncSplice	exon	119931244	119931389	.	+	.	gene_id "ENSMUSG00000034813"; transcript_id "mmCircRNA-96"; exon_number "2" gene_name "Grip1"; gene_biotype "protein_coding"; oId "ce:circGrip1-46-001"; tissue "ce";
10	ncSplice	exon	119938244	119938327	.	+	.	gene_id "ENSMUSG00000034813"; transcript_id "mmCircRNA-96"; exon_number "3" gene_name "Grip1"; gene_biotype "protein_coding"; oId "ce:circGrip1-46-001"; tissue "ce";
10	ncSplice	exon	119942862	119942937	.	+	.	gene_id "ENSMUSG00000034813"; transcript_id "mmCircRNA-96"; exon_number "4" gene_name "Grip1"; gene_biotype "protein_coding"; oId "ce:circGrip1-46-001"; tissue "ce";
10	ncSplice	exon	119945026	119945171	.	+	.	gene_id "ENSMUSG00000034813"; transcript_id "mmCircRNA-96"; exon_number "5" gene_name "Grip1"; gene_biotype "protein_coding"; oId "ce:circGrip1-46-001"; tissue "ce";
10	ncSplice	gene	121925816	121931509	.	-	.	gene_id "ENSMUSG00000020121"; gene_name "Srgap1"; gene_source "ncSplice"; gene_biotype "protein_coding";
10	ncSplice	transcript	121925816	121931509	.	-	.	gene_id "ENSMUSG00000020121"; transcript_id "mmCircRNA-97"; gene_name "Srgap1"; gene_biotype "protein_coding"; transcript_biotype "circRNA"; oId "ce:circSrgap1-54-001"; tissue "ce";
10	ncSplice	exon	121925816	121925978	.	-	.	gene_id "ENSMUSG00000020121"; transcript_id "mmCircRNA-97"; exon_number "1" gene_name "Srgap1"; gene_biotype "protein_coding"; oId "ce:circSrgap1-54-001"; tissue "ce";
10	ncSplice	exon	121931314	121931509	.	-	.	gene_id "ENSMUSG00000020121"; transcript_id "mmCircRNA-97"; exon_number "2" gene_name "Srgap1"; gene_biotype "protein_coding"; oId "ce:circSrgap1-54-001"; tissue "ce";
10	ncSplice	gene	12436281	12455564	.	-	.	gene_id "ENSMUSG00000019820"; gene_name "Utrn"; gene_source "ncSplice"; gene_biotype "protein_coding";
10	ncSplice	transcript	12436281	12455564	.	-	.	gene_id "ENSMUSG00000019820"; transcript_id "mmCircRNA-98"; gene_name "Utrn"; gene_biotype "protein_coding"; transcript_biotype "circRNA"; oId "ce:circUtrn-62-001"; tissue "ce";
10	ncSplice	exon	12436281	12436392	.	-	.	gene_id "ENSMUSG00000019820"; transcript_id "mmCircRNA-98"; exon_number "1" gene_name "Utrn"; gene_biotype "protein_coding"; oId "ce:circUtrn-62-001"; tissue "ce";
10	ncSplice	exon	12439627	12439793	.	-	.	gene_id "ENSMUSG00000019820"; transcript_id "mmCircRNA-98"; exon_number "2" gene_name "Utrn"; gene_biotype "protein_coding"; oId "ce:circUtrn-62-001"; tissue "ce";
10	ncSplice	exon	12441936	12442093	.	-	.	gene_id "ENSMUSG00000019820"; transcript_id "mmCircRNA-98"; exon_number "3" gene_name "Utrn"; gene_biotype "protein_coding"; oId "ce:circUtrn-62-001"; tissue "ce";
10	ncSplice	exon	12448007	12448092	.	-	.	gene_id "ENSMUSG00000019820"; transcript_id "mmCircRNA-98"; exon_number "4" gene_name "Utrn"; gene_biotype "protein_coding"; oId "ce:circUtrn-62-001"; tissue "ce";
10	ncSplice	exon	12455363	12455564	.	-	.	gene_id "ENSMUSG00000019820"; transcript_id "mmCircRNA-98"; exon_number "5" gene_name "Utrn"; gene_biotype "protein_coding"; oId "ce:circUtrn-62-001"; tissue "ce";
10	ncSplice	gene	18089448	18096336	.	+	.	gene_id "ENSMUSG00000019854"; gene_name "Reps1"; gene_source "ncSplice"; gene_biotype "protein_coding";
10	ncSplice	transcript	18089448	18096336	.	+	.	gene_id "ENSMUSG00000019854"; transcript_id "mmCircRNA-99"; gene_name "Reps1"; gene_biotype "protein_coding"; transcript_biotype "circRNA"; oId "ce:circReps1-75-002"; tissue "ce";
10	ncSplice	exon	18089448	18089571	.	+	.	gene_id "ENSMUSG00000019854"; transcript_id "mmCircRNA-99"; exon_number "1" gene_name "Reps1"; gene_biotype "protein_coding"; oId "ce:circReps1-75-002"; tissue "ce";
10	ncSplice	exon	18092845	18093041	.	+	.	gene_id "ENSMUSG00000019854"; transcript_id "mmCircRNA-99"; exon_number "2" gene_name "Reps1"; gene_biotype "protein_coding"; oId "ce:circReps1-75-002"; tissue "ce";
10	ncSplice	exon	18093170	18093323	.	+	.	gene_id "ENSMUSG00000019854"; transcript_id "mmCircRNA-99"; exon_number "3" gene_name "Reps1"; gene_biotype "protein_coding"; oId "ce:circReps1-75-002"; tissue "ce";
10	ncSplice	exon	18093779	18093903	.	+	.	gene_id "ENSMUSG00000019854"; transcript_id "mmCircRNA-99"; exon_number "4" gene_name "Reps1"; gene_biotype "protein_coding"; oId "ce:circReps1-75-002"; tissue "ce";
10	ncSplice	exon	18094410	18094572	.	+	.	gene_id "ENSMUSG00000019854"; transcript_id "mmCircRNA-99"; exon_number "5" gene_name "Reps1"; gene_biotype "protein_coding"; oId "ce:circReps1-75-002"; tissue "ce";
10	ncSplice	exon	18094845	18094908	.	+	.	gene_id "ENSMUSG00000019854"; transcript_id "mmCircRNA-99"; exon_number "6" gene_name "Reps1"; gene_biotype "protein_coding"; oId "ce:circReps1-75-002"; tissue "ce";
10	ncSplice	exon	18096182	18096336	.	+	.	gene_id "ENSMUSG00000019854"; transcript_id "mmCircRNA-99"; exon_number "7" gene_name "Reps1"; gene_biotype "protein_coding"; oId "ce:circReps1-75-002"; tissue "ce";
10	ncSplice	gene	18092845	18094908	.	+	.	gene_id "ENSMUSG00000019854"; gene_name "Reps1"; gene_source "ncSplice"; gene_biotype "protein_coding";
10	ncSplice	transcript	18092845	18094908	.	+	.	gene_id "ENSMUSG00000019854"; transcript_id "mmCircRNA-100"; gene_name "Reps1"; gene_biotype "protein_coding"; transcript_biotype "circRNA"; oId "ce:circReps1-76-002"; tissue "ce";
10	ncSplice	exon	18092845	18093041	.	+	.	gene_id "ENSMUSG00000019854"; transcript_id "mmCircRNA-100"; exon_number "1" gene_name "Reps1"; gene_biotype "protein_coding"; oId "ce:circReps1-76-002"; tissue "ce";
10	ncSplice	exon	18093170	18093323	.	+	.	gene_id "ENSMUSG00000019854"; transcript_id "mmCircRNA-100"; exon_number "2" gene_name "Reps1"; gene_biotype "protein_coding"; oId "ce:circReps1-76-002"; tissue "ce";
10	ncSplice	exon	18093779	18093903	.	+	.	gene_id "ENSMUSG00000019854"; transcript_id "mmCircRNA-100"; exon_number "3" gene_name "Reps1"; gene_biotype "protein_coding"; oId "ce:circReps1-76-002"; tissue "ce";
10	ncSplice	exon	18094410	18094572	.	+	.	gene_id "ENSMUSG00000019854"; transcript_id "mmCircRNA-100"; exon_number "4" gene_name "Reps1"; gene_biotype "protein_coding"; oId "ce:circReps1-76-002"; tissue "ce";
10	ncSplice	exon	18094845	18094908	.	+	.	gene_id "ENSMUSG00000019854"; transcript_id "mmCircRNA-100"; exon_number "5" gene_name "Reps1"; gene_biotype "protein_coding"; oId "ce:circReps1-76-002"; tissue "ce";
10	ncSplice	gene	22705693	22712091	.	-	.	gene_id "ENSMUSG00000071359"; gene_name "Tbpl1"; gene_source "ncSplice"; gene_biotype "protein_coding";
10	ncSplice	transcript	22705693	22712091	.	-	.	gene_id "ENSMUSG00000071359"; transcript_id "mmCircRNA-101"; gene_name "Tbpl1"; gene_biotype "protein_coding"; transcript_biotype "circRNA"; oId "ce:circTbpl1-87-001"; tissue "ce";
10	ncSplice	exon	22705693	22705895	.	-	.	gene_id "ENSMUSG00000071359"; transcript_id "mmCircRNA-101"; exon_number "1" gene_name "Tbpl1"; gene_biotype "protein_coding"; oId "ce:circTbpl1-87-001"; tissue "ce";
10	ncSplice	exon	22707589	22707683	.	-	.	gene_id "ENSMUSG00000071359"; transcript_id "mmCircRNA-101"; exon_number "2" gene_name "Tbpl1"; gene_biotype "protein_coding"; oId "ce:circTbpl1-87-001"; tissue "ce";
10	ncSplice	exon	22707771	22707874	.	-	.	gene_id "ENSMUSG00000071359"; transcript_id "mmCircRNA-101"; exon_number "3" gene_name "Tbpl1"; gene_biotype "protein_coding"; oId "ce:circTbpl1-87-001"; tissue "ce";
10	ncSplice	exon	22709146	22709209	.	-	.	gene_id "ENSMUSG00000071359"; transcript_id "mmCircRNA-101"; exon_number "4" gene_name "Tbpl1"; gene_biotype "protein_coding"; oId "ce:circTbpl1-87-001"; tissue "ce";
10	ncSplice	exon	22709357	22709439	.	-	.	gene_id "ENSMUSG00000071359"; transcript_id "mmCircRNA-101"; exon_number "5" gene_name "Tbpl1"; gene_biotype "protein_coding"; oId "ce:circTbpl1-87-001"; tissue "ce";
10	ncSplice	exon	22711914	22712091	.	-	.	gene_id "ENSMUSG00000071359"; transcript_id "mmCircRNA-101"; exon_number "6" gene_name "Tbpl1"; gene_biotype "protein_coding"; oId "ce:circTbpl1-87-001"; tissue "ce";
10	ncSplice	gene	25220611	25289730	.	-	.	gene_id "ENSMUSG00000039166"; gene_name "Akap7"; gene_source "ncSplice"; gene_biotype "protein_coding";
10	ncSplice	transcript	25220611	25289730	.	-	.	gene_id "ENSMUSG00000039166"; transcript_id "mmCircRNA-102"; gene_name "Akap7"; gene_biotype "protein_coding"; transcript_biotype "circRNA"; oId "ce:circAkap7-89-001"; tissue "ce";
10	ncSplice	exon	25220611	25220758	.	-	.	gene_id "ENSMUSG00000039166"; transcript_id "mmCircRNA-102"; exon_number "1" gene_name "Akap7"; gene_biotype "protein_coding"; oId "ce:circAkap7-89-001"; tissue "ce";
10	ncSplice	exon	25238634	25239738	.	-	.	gene_id "ENSMUSG00000039166"; transcript_id "mmCircRNA-102"; exon_number "2" gene_name "Akap7"; gene_biotype "protein_coding"; oId "ce:circAkap7-89-001"; tissue "ce";
10	ncSplice	exon	25267308	25267468	.	-	.	gene_id "ENSMUSG00000039166"; transcript_id "mmCircRNA-102"; exon_number "3" gene_name "Akap7"; gene_biotype "protein_coding"; oId "ce:circAkap7-89-001"; tissue "ce";
10	ncSplice	exon	25271505	25271641	.	-	.	gene_id "ENSMUSG00000039166"; transcript_id "mmCircRNA-102"; exon_number "4" gene_name "Akap7"; gene_biotype "protein_coding"; oId "ce:circAkap7-89-001"; tissue "ce";
10	ncSplice	exon	25283893	25284041	.	-	.	gene_id "ENSMUSG00000039166"; transcript_id "mmCircRNA-102"; exon_number "5" gene_name "Akap7"; gene_biotype "protein_coding"; oId "ce:circAkap7-89-001"; tissue "ce";
10	ncSplice	exon	25289599	25289730	.	-	.	gene_id "ENSMUSG00000039166"; transcript_id "mmCircRNA-102"; exon_number "6" gene_name "Akap7"; gene_biotype "protein_coding"; oId "ce:circAkap7-89-001"; tissue "ce";
10	ncSplice	gene	30722646	30771840	.	-	.	gene_id "ENSMUSG00000039697"; gene_name "Ncoa7"; gene_source "ncSplice"; gene_biotype "protein_coding";
10	ncSplice	transcript	30722646	30771840	.	-	.	gene_id "ENSMUSG00000039697"; transcript_id "mmCircRNA-103"; gene_name "Ncoa7"; gene_biotype "protein_coding"; transcript_biotype "circRNA"; oId "ce:circNcoa7-95-001"; tissue "ce";
10	ncSplice	exon	30722646	30722866	.	-	.	gene_id "ENSMUSG00000039697"; transcript_id "mmCircRNA-103"; exon_number "1" gene_name "Ncoa7"; gene_biotype "protein_coding"; oId "ce:circNcoa7-95-001"; tissue "ce";
10	ncSplice	exon	30771720	30771840	.	-	.	gene_id "ENSMUSG00000039697"; transcript_id "mmCircRNA-103"; exon_number "2" gene_name "Ncoa7"; gene_biotype "protein_coding"; oId "ce:circNcoa7-95-001"; tissue "ce";
10	ncSplice	gene	39832518	39846913	.	+	.	gene_id "ENSMUSG00000019841"; gene_name "Rev3l"; gene_source "ncSplice"; gene_biotype "protein_coding";
10	ncSplice	transcript	39832518	39846913	.	+	.	gene_id "ENSMUSG00000019841"; transcript_id "mmCircRNA-104"; gene_name "Rev3l"; gene_biotype "protein_coding"; transcript_biotype "circRNA"; oId "ce:circRev3l-103-001"; tissue "ce";
10	ncSplice	exon	39832518	39832643	.	+	.	gene_id "ENSMUSG00000019841"; transcript_id "mmCircRNA-104"; exon_number "1" gene_name "Rev3l"; gene_biotype "protein_coding"; oId "ce:circRev3l-103-001"; tissue "ce";
10	ncSplice	exon	39835160	39835352	.	+	.	gene_id "ENSMUSG00000019841"; transcript_id "mmCircRNA-104"; exon_number "2" gene_name "Rev3l"; gene_biotype "protein_coding"; oId "ce:circRev3l-103-001"; tissue "ce";
10	ncSplice	exon	39836626	39836737	.	+	.	gene_id "ENSMUSG00000019841"; transcript_id "mmCircRNA-104"; exon_number "3" gene_name "Rev3l"; gene_biotype "protein_coding"; oId "ce:circRev3l-103-001"; tissue "ce";
10	ncSplice	exon	39838442	39838557	.	+	.	gene_id "ENSMUSG00000019841"; transcript_id "mmCircRNA-104"; exon_number "4" gene_name "Rev3l"; gene_biotype "protein_coding"; oId "ce:circRev3l-103-001"; tissue "ce";
10	ncSplice	exon	39840885	39841003	.	+	.	gene_id "ENSMUSG00000019841"; transcript_id "mmCircRNA-104"; exon_number "5" gene_name "Rev3l"; gene_biotype "protein_coding"; oId "ce:circRev3l-103-001"; tissue "ce";
10	ncSplice	exon	39843411	39843529	.	+	.	gene_id "ENSMUSG00000019841"; transcript_id "mmCircRNA-104"; exon_number "6" gene_name "Rev3l"; gene_biotype "protein_coding"; oId "ce:circRev3l-103-001"; tissue "ce";
10	ncSplice	exon	39846142	39846283	.	+	.	gene_id "ENSMUSG00000019841"; transcript_id "mmCircRNA-104"; exon_number "7" gene_name "Rev3l"; gene_biotype "protein_coding"; oId "ce:circRev3l-103-001"; tissue "ce";
10	ncSplice	exon	39846669	39846913	.	+	.	gene_id "ENSMUSG00000019841"; transcript_id "mmCircRNA-104"; exon_number "8" gene_name "Rev3l"; gene_biotype "protein_coding"; oId "ce:circRev3l-103-001"; tissue "ce";
10	ncSplice	gene	49523682	49535499	.	-	.	gene_id "ENSMUSG00000056073"; gene_name "Grik2"; gene_source "ncSplice"; gene_biotype "protein_coding";
10	ncSplice	transcript	49523682	49535499	.	-	.	gene_id "ENSMUSG00000056073"; transcript_id "mmCircRNA-105"; gene_name "Grik2"; gene_biotype "protein_coding"; transcript_biotype "circRNA"; oId "ce:circGrik2-133-001"; tissue "ce";
10	ncSplice	exon	49523682	49523855	.	-	.	gene_id "ENSMUSG00000056073"; transcript_id "mmCircRNA-105"; exon_number "1" gene_name "Grik2"; gene_biotype "protein_coding"; oId "ce:circGrik2-133-001"; tissue "ce";
10	ncSplice	exon	49527987	49528040	.	-	.	gene_id "ENSMUSG00000056073"; transcript_id "mmCircRNA-105"; exon_number "2" gene_name "Grik2"; gene_biotype "protein_coding"; oId "ce:circGrik2-133-001"; tissue "ce";
10	ncSplice	exon	49535318	49535499	.	-	.	gene_id "ENSMUSG00000056073"; transcript_id "mmCircRNA-105"; exon_number "3" gene_name "Grik2"; gene_biotype "protein_coding"; oId "ce:circGrik2-133-001"; tissue "ce";
10	ncSplice	gene	49523682	49578302	.	-	.	gene_id "ENSMUSG00000056073"; gene_name "Grik2"; gene_source "ncSplice"; gene_biotype "protein_coding";
10	ncSplice	transcript	49523682	49578302	.	-	.	gene_id "ENSMUSG00000056073"; transcript_id "mmCircRNA-106"; gene_name "Grik2"; gene_biotype "protein_coding"; transcript_biotype "circRNA"; oId "ce:circGrik2-134-001"; tissue "ce";
10	ncSplice	exon	49523682	49523855	.	-	.	gene_id "ENSMUSG00000056073"; transcript_id "mmCircRNA-106"; exon_number "1" gene_name "Grik2"; gene_biotype "protein_coding"; oId "ce:circGrik2-134-001"; tissue "ce";
10	ncSplice	exon	49527987	49528040	.	-	.	gene_id "ENSMUSG00000056073"; transcript_id "mmCircRNA-106"; exon_number "2" gene_name "Grik2"; gene_biotype "protein_coding"; oId "ce:circGrik2-134-001"; tissue "ce";
10	ncSplice	exon	49535318	49535499	.	-	.	gene_id "ENSMUSG00000056073"; transcript_id "mmCircRNA-106"; exon_number "3" gene_name "Grik2"; gene_biotype "protein_coding"; oId "ce:circGrik2-134-001"; tissue "ce";
10	ncSplice	exon	49573564	49573821	.	-	.	gene_id "ENSMUSG00000056073"; transcript_id "mmCircRNA-106"; exon_number "4" gene_name "Grik2"; gene_biotype "protein_coding"; oId "ce:circGrik2-134-001"; tissue "ce";
10	ncSplice	exon	49578135	49578302	.	-	.	gene_id "ENSMUSG00000056073"; transcript_id "mmCircRNA-106"; exon_number "5" gene_name "Grik2"; gene_biotype "protein_coding"; oId "ce:circGrik2-134-001"; tissue "ce";
10	ncSplice	gene	53674566	53690148	.	-	.	gene_id "ENSMUSG00000019856"; gene_name "Fam184a"; gene_source "ncSplice"; gene_biotype "protein_coding";
10	ncSplice	transcript	53674566	53690148	.	-	.	gene_id "ENSMUSG00000019856"; transcript_id "mmCircRNA-107"; gene_name "Fam184a"; gene_biotype "protein_coding"; transcript_biotype "circRNA"; oId "ce:circFam184a-143-001"; tissue "ce";
10	ncSplice	exon	53674566	53674716	.	-	.	gene_id "ENSMUSG00000019856"; transcript_id "mmCircRNA-107"; exon_number "1" gene_name "Fam184a"; gene_biotype "protein_coding"; oId "ce:circFam184a-143-001"; tissue "ce";
10	ncSplice	exon	53675136	53675257	.	-	.	gene_id "ENSMUSG00000019856"; transcript_id "mmCircRNA-107"; exon_number "2" gene_name "Fam184a"; gene_biotype "protein_coding"; oId "ce:circFam184a-143-001"; tissue "ce";
10	ncSplice	exon	53677731	53677892	.	-	.	gene_id "ENSMUSG00000019856"; transcript_id "mmCircRNA-107"; exon_number "3" gene_name "Fam184a"; gene_biotype "protein_coding"; oId "ce:circFam184a-143-001"; tissue "ce";
10	ncSplice	exon	53684236	53684358	.	-	.	gene_id "ENSMUSG00000019856"; transcript_id "mmCircRNA-107"; exon_number "4" gene_name "Fam184a"; gene_biotype "protein_coding"; oId "ce:circFam184a-143-001"; tissue "ce";
10	ncSplice	exon	53689951	53690148	.	-	.	gene_id "ENSMUSG00000019856"; transcript_id "mmCircRNA-107"; exon_number "5" gene_name "Fam184a"; gene_biotype "protein_coding"; oId "ce:circFam184a-143-001"; tissue "ce";
10	ncSplice	gene	62776568	62776963	.	-	.	gene_id "ENSMUSG00000020074"; gene_name "Ccar1"; gene_source "ncSplice"; gene_biotype "protein_coding";
10	ncSplice	transcript	62776568	62776963	.	-	.	gene_id "ENSMUSG00000020074"; transcript_id "mmCircRNA-108"; gene_name "Ccar1"; gene_biotype "protein_coding"; transcript_biotype "circRNA"; oId "ce:circCcar1-157-001|ts:circCcar1-136-001"; tissue "ce|ts";
10	ncSplice	exon	62776568	62776760	.	-	.	gene_id "ENSMUSG00000020074"; transcript_id "mmCircRNA-108"; exon_number "1" gene_name "Ccar1"; gene_biotype "protein_coding"; oId "ce:circCcar1-157-001|ts:circCcar1-136-001"; tissue "ce|ts";
10	ncSplice	exon	62776849	62776963	.	-	.	gene_id "ENSMUSG00000020074"; transcript_id "mmCircRNA-108"; exon_number "2" gene_name "Ccar1"; gene_biotype "protein_coding"; oId "ce:circCcar1-157-001|ts:circCcar1-136-001"; tissue "ce|ts";
10	ncSplice	gene	62832894	62840378	.	-	.	gene_id "ENSMUSG00000047146"; gene_name "Tet1"; gene_source "ncSplice"; gene_biotype "protein_coding";
10	ncSplice	transcript	62832894	62840378	.	-	.	gene_id "ENSMUSG00000047146"; transcript_id "mmCircRNA-109"; gene_name "Tet1"; gene_biotype "protein_coding"; transcript_biotype "circRNA"; oId "ce:circTet1-158-001"; tissue "ce";
10	ncSplice	exon	62832894	62832987	.	-	.	gene_id "ENSMUSG00000047146"; transcript_id "mmCircRNA-109"; exon_number "1" gene_name "Tet1"; gene_biotype "protein_coding"; oId "ce:circTet1-158-001"; tissue "ce";
10	ncSplice	exon	62833538	62833628	.	-	.	gene_id "ENSMUSG00000047146"; transcript_id "mmCircRNA-109"; exon_number "2" gene_name "Tet1"; gene_biotype "protein_coding"; oId "ce:circTet1-158-001"; tissue "ce";
10	ncSplice	exon	62838176	62840378	.	-	.	gene_id "ENSMUSG00000047146"; transcript_id "mmCircRNA-109"; exon_number "3" gene_name "Tet1"; gene_biotype "protein_coding"; oId "ce:circTet1-158-001"; tissue "ce";
10	ncSplice	gene	67157907	67189849	.	+	.	gene_id "ENSMUSG00000037876"; gene_name "Jmjd1c"; gene_source "ncSplice"; gene_biotype "protein_coding";
10	ncSplice	transcript	67157907	67189849	.	+	.	gene_id "ENSMUSG00000037876"; transcript_id "mmCircRNA-110"; gene_name "Jmjd1c"; gene_biotype "protein_coding"; transcript_biotype "circRNA"; oId "ce:circJmjd1c-168-001|ts:circJmjd1c-149-001"; tissue "ce|ts";
10	ncSplice	exon	67157907	67158071	.	+	.	gene_id "ENSMUSG00000037876"; transcript_id "mmCircRNA-110"; exon_number "1" gene_name "Jmjd1c"; gene_biotype "protein_coding"; oId "ce:circJmjd1c-168-001|ts:circJmjd1c-149-001"; tissue "ce|ts";
10	ncSplice	exon	67189736	67189849	.	+	.	gene_id "ENSMUSG00000037876"; transcript_id "mmCircRNA-110"; exon_number "2" gene_name "Jmjd1c"; gene_biotype "protein_coding"; oId "ce:circJmjd1c-168-001|ts:circJmjd1c-149-001"; tissue "ce|ts";
10	ncSplice	gene	7140319	7154485	.	-	.	gene_id "ENSMUSG00000015202"; gene_name "Cnksr3"; gene_source "ncSplice"; gene_biotype "protein_coding";
10	ncSplice	transcript	7140319	7154485	.	-	.	gene_id "ENSMUSG00000015202"; transcript_id "mmCircRNA-111"; gene_name "Cnksr3"; gene_biotype "protein_coding"; transcript_biotype "circRNA"; oId "ce:circCnksr3-186-001"; tissue "ce";
10	ncSplice	exon	7140319	7140438	.	-	.	gene_id "ENSMUSG00000015202"; transcript_id "mmCircRNA-111"; exon_number "1" gene_name "Cnksr3"; gene_biotype "protein_coding"; oId "ce:circCnksr3-186-001"; tissue "ce";
10	ncSplice	exon	7142961	7143002	.	-	.	gene_id "ENSMUSG00000015202"; transcript_id "mmCircRNA-111"; exon_number "2" gene_name "Cnksr3"; gene_biotype "protein_coding"; oId "ce:circCnksr3-186-001"; tissue "ce";
10	ncSplice	exon	7152864	7152951	.	-	.	gene_id "ENSMUSG00000015202"; transcript_id "mmCircRNA-111"; exon_number "3" gene_name "Cnksr3"; gene_biotype "protein_coding"; oId "ce:circCnksr3-186-001"; tissue "ce";
10	ncSplice	exon	7154283	7154485	.	-	.	gene_id "ENSMUSG00000015202"; transcript_id "mmCircRNA-111"; exon_number "4" gene_name "Cnksr3"; gene_biotype "protein_coding"; oId "ce:circCnksr3-186-001"; tissue "ce";
10	ncSplice	gene	7152864	7154485	.	-	.	gene_id "ENSMUSG00000015202"; gene_name "Cnksr3"; gene_source "ncSplice"; gene_biotype "protein_coding";
10	ncSplice	transcript	7152864	7154485	.	-	.	gene_id "ENSMUSG00000015202"; transcript_id "mmCircRNA-112"; gene_name "Cnksr3"; gene_biotype "protein_coding"; transcript_biotype "circRNA"; oId "ce:circCnksr3-188-001"; tissue "ce";
10	ncSplice	exon	7152864	7152951	.	-	.	gene_id "ENSMUSG00000015202"; transcript_id "mmCircRNA-112"; exon_number "1" gene_name "Cnksr3"; gene_biotype "protein_coding"; oId "ce:circCnksr3-188-001"; tissue "ce";
10	ncSplice	exon	7154283	7154485	.	-	.	gene_id "ENSMUSG00000015202"; transcript_id "mmCircRNA-112"; exon_number "2" gene_name "Cnksr3"; gene_biotype "protein_coding"; oId "ce:circCnksr3-188-001"; tissue "ce";
10	ncSplice	gene	7152864	7160807	.	-	.	gene_id "ENSMUSG00000015202"; gene_name "Cnksr3"; gene_source "ncSplice"; gene_biotype "protein_coding";
10	ncSplice	transcript	7152864	7160807	.	-	.	gene_id "ENSMUSG00000015202"; transcript_id "mmCircRNA-113"; gene_name "Cnksr3"; gene_biotype "protein_coding"; transcript_biotype "circRNA"; oId "ce:circCnksr3-189-001"; tissue "ce";
10	ncSplice	exon	7152864	7152951	.	-	.	gene_id "ENSMUSG00000015202"; transcript_id "mmCircRNA-113"; exon_number "1" gene_name "Cnksr3"; gene_biotype "protein_coding"; oId "ce:circCnksr3-189-001"; tissue "ce";
10	ncSplice	exon	7154283	7154485	.	-	.	gene_id "ENSMUSG00000015202"; transcript_id "mmCircRNA-113"; exon_number "2" gene_name "Cnksr3"; gene_biotype "protein_coding"; oId "ce:circCnksr3-189-001"; tissue "ce";
10	ncSplice	exon	7160644	7160807	.	-	.	gene_id "ENSMUSG00000015202"; transcript_id "mmCircRNA-113"; exon_number "3" gene_name "Cnksr3"; gene_biotype "protein_coding"; oId "ce:circCnksr3-189-001"; tissue "ce";
10	ncSplice	gene	75245079	75261957	.	+	.	gene_id "ENSMUSG00000033444"; gene_name "Specc1l"; gene_source "ncSplice"; gene_biotype "protein_coding";
10	ncSplice	transcript	75245079	75261957	.	+	.	gene_id "ENSMUSG00000033444"; transcript_id "mmCircRNA-114"; gene_name "Specc1l"; gene_biotype "protein_coding"; transcript_biotype "circRNA"; oId "ce:circSpecc1l-192-001"; tissue "ce";
10	ncSplice	exon	75245079	75246712	.	+	.	gene_id "ENSMUSG00000033444"; transcript_id "mmCircRNA-114"; exon_number "1" gene_name "Specc1l"; gene_biotype "protein_coding"; oId "ce:circSpecc1l-192-001"; tissue "ce";
10	ncSplice	exon	75248437	75248644	.	+	.	gene_id "ENSMUSG00000033444"; transcript_id "mmCircRNA-114"; exon_number "2" gene_name "Specc1l"; gene_biotype "protein_coding"; oId "ce:circSpecc1l-192-001"; tissue "ce";
10	ncSplice	exon	75257868	75257941	.	+	.	gene_id "ENSMUSG00000033444"; transcript_id "mmCircRNA-114"; exon_number "3" gene_name "Specc1l"; gene_biotype "protein_coding"; oId "ce:circSpecc1l-192-001"; tissue "ce";
10	ncSplice	exon	75258968	75259143	.	+	.	gene_id "ENSMUSG00000033444"; transcript_id "mmCircRNA-114"; exon_number "4" gene_name "Specc1l"; gene_biotype "protein_coding"; oId "ce:circSpecc1l-192-001"; tissue "ce";
10	ncSplice	exon	75261794	75261957	.	+	.	gene_id "ENSMUSG00000033444"; transcript_id "mmCircRNA-114"; exon_number "5" gene_name "Specc1l"; gene_biotype "protein_coding"; oId "ce:circSpecc1l-192-001"; tissue "ce";
10	ncSplice	gene	75274017	75279961	.	+	.	gene_id "ENSMUSG00000033444"; gene_name "Specc1l"; gene_source "ncSplice"; gene_biotype "protein_coding";
10	ncSplice	transcript	75274017	75279961	.	+	.	gene_id "ENSMUSG00000033444"; transcript_id "mmCircRNA-115"; gene_name "Specc1l"; gene_biotype "protein_coding"; transcript_biotype "circRNA"; oId "ce:circSpecc1l-195-001"; tissue "ce";
10	ncSplice	exon	75274017	75274100	.	+	.	gene_id "ENSMUSG00000033444"; transcript_id "mmCircRNA-115"; exon_number "1" gene_name "Specc1l"; gene_biotype "protein_coding"; oId "ce:circSpecc1l-195-001"; tissue "ce";
10	ncSplice	exon	75276771	75276927	.	+	.	gene_id "ENSMUSG00000033444"; transcript_id "mmCircRNA-115"; exon_number "2" gene_name "Specc1l"; gene_biotype "protein_coding"; oId "ce:circSpecc1l-195-001"; tissue "ce";
10	ncSplice	exon	75279859	75279961	.	+	.	gene_id "ENSMUSG00000033444"; transcript_id "mmCircRNA-115"; exon_number "3" gene_name "Specc1l"; gene_biotype "protein_coding"; oId "ce:circSpecc1l-195-001"; tissue "ce";
10	ncSplice	gene	88809082	88810085	.	-	.	gene_id "ENSMUSG00000004356"; gene_name "Utp20"; gene_source "ncSplice"; gene_biotype "protein_coding";
10	ncSplice	transcript	88809082	88810085	.	-	.	gene_id "ENSMUSG00000004356"; transcript_id "mmCircRNA-116"; gene_name "Utp20"; gene_biotype "protein_coding"; transcript_biotype "circRNA"; oId "ce:circUtp20-227-001"; tissue "ce";
10	ncSplice	exon	88809082	88809187	.	-	.	gene_id "ENSMUSG00000004356"; transcript_id "mmCircRNA-116"; exon_number "1" gene_name "Utp20"; gene_biotype "protein_coding"; oId "ce:circUtp20-227-001"; tissue "ce";
10	ncSplice	exon	88809715	88809803	.	-	.	gene_id "ENSMUSG00000004356"; transcript_id "mmCircRNA-116"; exon_number "2" gene_name "Utp20"; gene_biotype "protein_coding"; oId "ce:circUtp20-227-001"; tissue "ce";
10	ncSplice	exon	88809930	88810085	.	-	.	gene_id "ENSMUSG00000004356"; transcript_id "mmCircRNA-116"; exon_number "3" gene_name "Utp20"; gene_biotype "protein_coding"; oId "ce:circUtp20-227-001"; tissue "ce";
10	ncSplice	gene	89787105	89794624	.	+	.	gene_id "ENSMUSG00000019951"; gene_name "Uhrf1bp1l"; gene_source "ncSplice"; gene_biotype "protein_coding";
10	ncSplice	transcript	89787105	89794624	.	+	.	gene_id "ENSMUSG00000019951"; transcript_id "mmCircRNA-117"; gene_name "Uhrf1bp1l"; gene_biotype "protein_coding"; transcript_biotype "circRNA"; oId "ce:circUhrf1bp1l-235-001"; tissue "ce";
10	ncSplice	exon	89787105	89787285	.	+	.	gene_id "ENSMUSG00000019951"; transcript_id "mmCircRNA-117"; exon_number "1" gene_name "Uhrf1bp1l"; gene_biotype "protein_coding"; oId "ce:circUhrf1bp1l-235-001"; tissue "ce";
10	ncSplice	exon	89789298	89789381	.	+	.	gene_id "ENSMUSG00000019951"; transcript_id "mmCircRNA-117"; exon_number "2" gene_name "Uhrf1bp1l"; gene_biotype "protein_coding"; oId "ce:circUhrf1bp1l-235-001"; tissue "ce";
10	ncSplice	exon	89790551	89790733	.	+	.	gene_id "ENSMUSG00000019951"; transcript_id "mmCircRNA-117"; exon_number "3" gene_name "Uhrf1bp1l"; gene_biotype "protein_coding"; oId "ce:circUhrf1bp1l-235-001"; tissue "ce";
10	ncSplice	exon	89791363	89791481	.	+	.	gene_id "ENSMUSG00000019951"; transcript_id "mmCircRNA-117"; exon_number "4" gene_name "Uhrf1bp1l"; gene_biotype "protein_coding"; oId "ce:circUhrf1bp1l-235-001"; tissue "ce";
10	ncSplice	exon	89794483	89794624	.	+	.	gene_id "ENSMUSG00000019951"; transcript_id "mmCircRNA-117"; exon_number "5" gene_name "Uhrf1bp1l"; gene_biotype "protein_coding"; oId "ce:circUhrf1bp1l-235-001"; tissue "ce";
10	ncSplice	gene	90033214	90077142	.	+	.	gene_id "ENSMUSG00000058589"; gene_name "Anks1b"; gene_source "ncSplice"; gene_biotype "protein_coding";
10	ncSplice	transcript	90033214	90077142	.	+	.	gene_id "ENSMUSG00000058589"; transcript_id "mmCircRNA-118"; gene_name "Anks1b"; gene_biotype "protein_coding"; transcript_biotype "circRNA"; oId "ce:circAnks1b-236-001"; tissue "ce";
10	ncSplice	exon	90033214	90033294	.	+	.	gene_id "ENSMUSG00000058589"; transcript_id "mmCircRNA-118"; exon_number "1" gene_name "Anks1b"; gene_biotype "protein_coding"; oId "ce:circAnks1b-236-001"; tissue "ce";
10	ncSplice	exon	90042546	90042702	.	+	.	gene_id "ENSMUSG00000058589"; transcript_id "mmCircRNA-118"; exon_number "2" gene_name "Anks1b"; gene_biotype "protein_coding"; oId "ce:circAnks1b-236-001"; tissue "ce";
10	ncSplice	exon	90049816	90050112	.	+	.	gene_id "ENSMUSG00000058589"; transcript_id "mmCircRNA-118"; exon_number "3" gene_name "Anks1b"; gene_biotype "protein_coding"; oId "ce:circAnks1b-236-001"; tissue "ce";
10	ncSplice	exon	90069468	90069543	.	+	.	gene_id "ENSMUSG00000058589"; transcript_id "mmCircRNA-118"; exon_number "4" gene_name "Anks1b"; gene_biotype "protein_coding"; oId "ce:circAnks1b-236-001"; tissue "ce";
10	ncSplice	exon	90071068	90071169	.	+	.	gene_id "ENSMUSG00000058589"; transcript_id "mmCircRNA-118"; exon_number "5" gene_name "Anks1b"; gene_biotype "protein_coding"; oId "ce:circAnks1b-236-001"; tissue "ce";
10	ncSplice	exon	90073979	90074092	.	+	.	gene_id "ENSMUSG00000058589"; transcript_id "mmCircRNA-118"; exon_number "6" gene_name "Anks1b"; gene_biotype "protein_coding"; oId "ce:circAnks1b-236-001"; tissue "ce";
10	ncSplice	exon	90076976	90077142	.	+	.	gene_id "ENSMUSG00000058589"; transcript_id "mmCircRNA-118"; exon_number "7" gene_name "Anks1b"; gene_biotype "protein_coding"; oId "ce:circAnks1b-236-001"; tissue "ce";
10	ncSplice	gene	90042546	90077142	.	+	.	gene_id "ENSMUSG00000058589"; gene_name "Anks1b"; gene_source "ncSplice"; gene_biotype "protein_coding";
10	ncSplice	transcript	90042546	90077142	.	+	.	gene_id "ENSMUSG00000058589"; transcript_id "mmCircRNA-119"; gene_name "Anks1b"; gene_biotype "protein_coding"; transcript_biotype "circRNA"; oId "ce:circAnks1b-237-001"; tissue "ce";
10	ncSplice	exon	90042546	90046652	.	+	.	gene_id "ENSMUSG00000058589"; transcript_id "mmCircRNA-119"; exon_number "1" gene_name "Anks1b"; gene_biotype "protein_coding"; oId "ce:circAnks1b-237-001"; tissue "ce";
10	ncSplice	exon	90049816	90050112	.	+	.	gene_id "ENSMUSG00000058589"; transcript_id "mmCircRNA-119"; exon_number "2" gene_name "Anks1b"; gene_biotype "protein_coding"; oId "ce:circAnks1b-237-001"; tissue "ce";
10	ncSplice	exon	90069468	90069543	.	+	.	gene_id "ENSMUSG00000058589"; transcript_id "mmCircRNA-119"; exon_number "3" gene_name "Anks1b"; gene_biotype "protein_coding"; oId "ce:circAnks1b-237-001"; tissue "ce";
10	ncSplice	exon	90071068	90071169	.	+	.	gene_id "ENSMUSG00000058589"; transcript_id "mmCircRNA-119"; exon_number "4" gene_name "Anks1b"; gene_biotype "protein_coding"; oId "ce:circAnks1b-237-001"; tissue "ce";
10	ncSplice	exon	90073979	90074092	.	+	.	gene_id "ENSMUSG00000058589"; transcript_id "mmCircRNA-119"; exon_number "5" gene_name "Anks1b"; gene_biotype "protein_coding"; oId "ce:circAnks1b-237-001"; tissue "ce";
10	ncSplice	exon	90076976	90077142	.	+	.	gene_id "ENSMUSG00000058589"; transcript_id "mmCircRNA-119"; exon_number "6" gene_name "Anks1b"; gene_biotype "protein_coding"; oId "ce:circAnks1b-237-001"; tissue "ce";
10	ncSplice	gene	90049816	90077142	.	+	.	gene_id "ENSMUSG00000058589"; gene_name "Anks1b"; gene_source "ncSplice"; gene_biotype "protein_coding";
10	ncSplice	transcript	90049816	90077142	.	+	.	gene_id "ENSMUSG00000058589"; transcript_id "mmCircRNA-120"; gene_name "Anks1b"; gene_biotype "protein_coding"; transcript_biotype "circRNA"; oId "ce:circAnks1b-238-001"; tissue "ce";
10	ncSplice	exon	90049816	90050112	.	+	.	gene_id "ENSMUSG00000058589"; transcript_id "mmCircRNA-120"; exon_number "1" gene_name "Anks1b"; gene_biotype "protein_coding"; oId "ce:circAnks1b-238-001"; tissue "ce";
10	ncSplice	exon	90069468	90069543	.	+	.	gene_id "ENSMUSG00000058589"; transcript_id "mmCircRNA-120"; exon_number "2" gene_name "Anks1b"; gene_biotype "protein_coding"; oId "ce:circAnks1b-238-001"; tissue "ce";
10	ncSplice	exon	90071068	90071169	.	+	.	gene_id "ENSMUSG00000058589"; transcript_id "mmCircRNA-120"; exon_number "3" gene_name "Anks1b"; gene_biotype "protein_coding"; oId "ce:circAnks1b-238-001"; tissue "ce";
10	ncSplice	exon	90073979	90074092	.	+	.	gene_id "ENSMUSG00000058589"; transcript_id "mmCircRNA-120"; exon_number "4" gene_name "Anks1b"; gene_biotype "protein_coding"; oId "ce:circAnks1b-238-001"; tissue "ce";
10	ncSplice	exon	90076976	90077142	.	+	.	gene_id "ENSMUSG00000058589"; transcript_id "mmCircRNA-120"; exon_number "5" gene_name "Anks1b"; gene_biotype "protein_coding"; oId "ce:circAnks1b-238-001"; tissue "ce";
10	ncSplice	gene	90069468	90077142	.	+	.	gene_id "ENSMUSG00000058589"; gene_name "Anks1b"; gene_source "ncSplice"; gene_biotype "protein_coding";
10	ncSplice	transcript	90069468	90077142	.	+	.	gene_id "ENSMUSG00000058589"; transcript_id "mmCircRNA-121"; gene_name "Anks1b"; gene_biotype "protein_coding"; transcript_biotype "circRNA"; oId "ce:circAnks1b-239-001"; tissue "ce";
10	ncSplice	exon	90069468	90069543	.	+	.	gene_id "ENSMUSG00000058589"; transcript_id "mmCircRNA-121"; exon_number "1" gene_name "Anks1b"; gene_biotype "protein_coding"; oId "ce:circAnks1b-239-001"; tissue "ce";
10	ncSplice	exon	90071068	90071169	.	+	.	gene_id "ENSMUSG00000058589"; transcript_id "mmCircRNA-121"; exon_number "2" gene_name "Anks1b"; gene_biotype "protein_coding"; oId "ce:circAnks1b-239-001"; tissue "ce";
10	ncSplice	exon	90073979	90074092	.	+	.	gene_id "ENSMUSG00000058589"; transcript_id "mmCircRNA-121"; exon_number "3" gene_name "Anks1b"; gene_biotype "protein_coding"; oId "ce:circAnks1b-239-001"; tissue "ce";
10	ncSplice	exon	90076976	90077142	.	+	.	gene_id "ENSMUSG00000058589"; transcript_id "mmCircRNA-121"; exon_number "4" gene_name "Anks1b"; gene_biotype "protein_coding"; oId "ce:circAnks1b-239-001"; tissue "ce";
10	ncSplice	gene	90069468	90163304	.	+	.	gene_id "ENSMUSG00000058589"; gene_name "Anks1b"; gene_source "ncSplice"; gene_biotype "protein_coding";
10	ncSplice	transcript	90069468	90163304	.	+	.	gene_id "ENSMUSG00000058589"; transcript_id "mmCircRNA-122"; gene_name "Anks1b"; gene_biotype "protein_coding"; transcript_biotype "circRNA"; oId "ce:circAnks1b-241-001"; tissue "ce";
10	ncSplice	exon	90069468	90069543	.	+	.	gene_id "ENSMUSG00000058589"; transcript_id "mmCircRNA-122"; exon_number "1" gene_name "Anks1b"; gene_biotype "protein_coding"; oId "ce:circAnks1b-241-001"; tissue "ce";
10	ncSplice	exon	90071068	90071169	.	+	.	gene_id "ENSMUSG00000058589"; transcript_id "mmCircRNA-122"; exon_number "2" gene_name "Anks1b"; gene_biotype "protein_coding"; oId "ce:circAnks1b-241-001"; tissue "ce";
10	ncSplice	exon	90073979	90074092	.	+	.	gene_id "ENSMUSG00000058589"; transcript_id "mmCircRNA-122"; exon_number "3" gene_name "Anks1b"; gene_biotype "protein_coding"; oId "ce:circAnks1b-241-001"; tissue "ce";
10	ncSplice	exon	90076976	90077142	.	+	.	gene_id "ENSMUSG00000058589"; transcript_id "mmCircRNA-122"; exon_number "4" gene_name "Anks1b"; gene_biotype "protein_coding"; oId "ce:circAnks1b-241-001"; tissue "ce";
10	ncSplice	exon	90163161	90163304	.	+	.	gene_id "ENSMUSG00000058589"; transcript_id "mmCircRNA-122"; exon_number "5" gene_name "Anks1b"; gene_biotype "protein_coding"; oId "ce:circAnks1b-241-001"; tissue "ce";
10	ncSplice	gene	90510596	90577195	.	+	.	gene_id "ENSMUSG00000058589"; gene_name "Anks1b"; gene_source "ncSplice"; gene_biotype "protein_coding";
10	ncSplice	transcript	90510596	90577195	.	+	.	gene_id "ENSMUSG00000058589"; transcript_id "mmCircRNA-123"; gene_name "Anks1b"; gene_biotype "protein_coding"; transcript_biotype "circRNA"; oId "ce:circAnks1b-245-001"; tissue "ce";
10	ncSplice	exon	90510596	90511182	.	+	.	gene_id "ENSMUSG00000058589"; transcript_id "mmCircRNA-123"; exon_number "1" gene_name "Anks1b"; gene_biotype "protein_coding"; oId "ce:circAnks1b-245-001"; tissue "ce";
10	ncSplice	exon	90512815	90512875	.	+	.	gene_id "ENSMUSG00000058589"; transcript_id "mmCircRNA-123"; exon_number "2" gene_name "Anks1b"; gene_biotype "protein_coding"; oId "ce:circAnks1b-245-001"; tissue "ce";
10	ncSplice	exon	90577089	90577195	.	+	.	gene_id "ENSMUSG00000058589"; transcript_id "mmCircRNA-123"; exon_number "3" gene_name "Anks1b"; gene_biotype "protein_coding"; oId "ce:circAnks1b-245-001"; tissue "ce";
10	ncSplice	gene	90895099	90948672	.	+	.	gene_id "ENSMUSG00000058589"; gene_name "Anks1b"; gene_source "ncSplice"; gene_biotype "protein_coding";
10	ncSplice	transcript	90895099	90948672	.	+	.	gene_id "ENSMUSG00000058589"; transcript_id "mmCircRNA-124"; gene_name "Anks1b"; gene_biotype "protein_coding"; transcript_biotype "circRNA"; oId "ce:circAnks1b-249-005"; tissue "ce";
10	ncSplice	exon	90895099	90895206	.	+	.	gene_id "ENSMUSG00000058589"; transcript_id "mmCircRNA-124"; exon_number "1" gene_name "Anks1b"; gene_biotype "protein_coding"; oId "ce:circAnks1b-249-005"; tissue "ce";
10	ncSplice	exon	90897247	90897426	.	+	.	gene_id "ENSMUSG00000058589"; transcript_id "mmCircRNA-124"; exon_number "2" gene_name "Anks1b"; gene_biotype "protein_coding"; oId "ce:circAnks1b-249-005"; tissue "ce";
10	ncSplice	exon	90921296	90921424	.	+	.	gene_id "ENSMUSG00000058589"; transcript_id "mmCircRNA-124"; exon_number "3" gene_name "Anks1b"; gene_biotype "protein_coding"; oId "ce:circAnks1b-249-005"; tissue "ce";
10	ncSplice	exon	90923531	90923602	.	+	.	gene_id "ENSMUSG00000058589"; transcript_id "mmCircRNA-124"; exon_number "4" gene_name "Anks1b"; gene_biotype "protein_coding"; oId "ce:circAnks1b-249-005"; tissue "ce";
10	ncSplice	exon	90940564	90940575	.	+	.	gene_id "ENSMUSG00000058589"; transcript_id "mmCircRNA-124"; exon_number "5" gene_name "Anks1b"; gene_biotype "protein_coding"; oId "ce:circAnks1b-249-005"; tissue "ce";
10	ncSplice	exon	90941426	90941512	.	+	.	gene_id "ENSMUSG00000058589"; transcript_id "mmCircRNA-124"; exon_number "6" gene_name "Anks1b"; gene_biotype "protein_coding"; oId "ce:circAnks1b-249-005"; tissue "ce";
10	ncSplice	exon	90948535	90948672	.	+	.	gene_id "ENSMUSG00000058589"; transcript_id "mmCircRNA-124"; exon_number "7" gene_name "Anks1b"; gene_biotype "protein_coding"; oId "ce:circAnks1b-249-005"; tissue "ce";
10	ncSplice	gene	90921296	90948672	.	+	.	gene_id "ENSMUSG00000058589"; gene_name "Anks1b"; gene_source "ncSplice"; gene_biotype "protein_coding";
10	ncSplice	transcript	90921296	90948672	.	+	.	gene_id "ENSMUSG00000058589"; transcript_id "mmCircRNA-125"; gene_name "Anks1b"; gene_biotype "protein_coding"; transcript_biotype "circRNA"; oId "ce:circAnks1b-251-001"; tissue "ce";
10	ncSplice	exon	90921296	90921424	.	+	.	gene_id "ENSMUSG00000058589"; transcript_id "mmCircRNA-125"; exon_number "1" gene_name "Anks1b"; gene_biotype "protein_coding"; oId "ce:circAnks1b-251-001"; tissue "ce";
10	ncSplice	exon	90923531	90923602	.	+	.	gene_id "ENSMUSG00000058589"; transcript_id "mmCircRNA-125"; exon_number "2" gene_name "Anks1b"; gene_biotype "protein_coding"; oId "ce:circAnks1b-251-001"; tissue "ce";
10	ncSplice	exon	90940564	90940575	.	+	.	gene_id "ENSMUSG00000058589"; transcript_id "mmCircRNA-125"; exon_number "3" gene_name "Anks1b"; gene_biotype "protein_coding"; oId "ce:circAnks1b-251-001"; tissue "ce";
10	ncSplice	exon	90941426	90941512	.	+	.	gene_id "ENSMUSG00000058589"; transcript_id "mmCircRNA-125"; exon_number "4" gene_name "Anks1b"; gene_biotype "protein_coding"; oId "ce:circAnks1b-251-001"; tissue "ce";
10	ncSplice	exon	90948535	90948672	.	+	.	gene_id "ENSMUSG00000058589"; transcript_id "mmCircRNA-125"; exon_number "5" gene_name "Anks1b"; gene_biotype "protein_coding"; oId "ce:circAnks1b-251-001"; tissue "ce";
10	ncSplice	gene	92075170	92136690	.	-	.	gene_id "ENSMUSG00000097348"; gene_name "Rmst"; gene_source "ncSplice"; gene_biotype "lincRNA";
10	ncSplice	transcript	92075170	92136690	.	-	.	gene_id "ENSMUSG00000097348"; transcript_id "mmCircRNA-126"; gene_name "Rmst"; gene_biotype "lincRNA"; transcript_biotype "circRNA"; oId "ce:circRmst-253-030"; tissue "ce";
10	ncSplice	exon	92075170	92075412	.	-	.	gene_id "ENSMUSG00000097348"; transcript_id "mmCircRNA-126"; exon_number "1" gene_name "Rmst"; gene_biotype "lincRNA"; oId "ce:circRmst-253-030"; tissue "ce";
10	ncSplice	exon	92075513	92075673	.	-	.	gene_id "ENSMUSG00000097348"; transcript_id "mmCircRNA-126"; exon_number "2" gene_name "Rmst"; gene_biotype "lincRNA"; oId "ce:circRmst-253-030"; tissue "ce";
10	ncSplice	exon	92083874	92084082	.	-	.	gene_id "ENSMUSG00000097348"; transcript_id "mmCircRNA-126"; exon_number "3" gene_name "Rmst"; gene_biotype "lincRNA"; oId "ce:circRmst-253-030"; tissue "ce";
10	ncSplice	exon	92103706	92103912	.	-	.	gene_id "ENSMUSG00000097348"; transcript_id "mmCircRNA-126"; exon_number "4" gene_name "Rmst"; gene_biotype "lincRNA"; oId "ce:circRmst-253-030"; tissue "ce";
10	ncSplice	exon	92109639	92109733	.	-	.	gene_id "ENSMUSG00000097348"; transcript_id "mmCircRNA-126"; exon_number "5" gene_name "Rmst"; gene_biotype "lincRNA"; oId "ce:circRmst-253-030"; tissue "ce";
10	ncSplice	exon	92133223	92133348	.	-	.	gene_id "ENSMUSG00000097348"; transcript_id "mmCircRNA-126"; exon_number "6" gene_name "Rmst"; gene_biotype "lincRNA"; oId "ce:circRmst-253-030"; tissue "ce";
10	ncSplice	exon	92134242	92134316	.	-	.	gene_id "ENSMUSG00000097348"; transcript_id "mmCircRNA-126"; exon_number "7" gene_name "Rmst"; gene_biotype "lincRNA"; oId "ce:circRmst-253-030"; tissue "ce";
10	ncSplice	exon	92134964	92135095	.	-	.	gene_id "ENSMUSG00000097348"; transcript_id "mmCircRNA-126"; exon_number "8" gene_name "Rmst"; gene_biotype "lincRNA"; oId "ce:circRmst-253-030"; tissue "ce";
10	ncSplice	exon	92135701	92135809	.	-	.	gene_id "ENSMUSG00000097348"; transcript_id "mmCircRNA-126"; exon_number "9" gene_name "Rmst"; gene_biotype "lincRNA"; oId "ce:circRmst-253-030"; tissue "ce";
10	ncSplice	exon	92136557	92136690	.	-	.	gene_id "ENSMUSG00000097348"; transcript_id "mmCircRNA-126"; exon_number "10" gene_name "Rmst"; gene_biotype "lincRNA"; oId "ce:circRmst-253-030"; tissue "ce";
10	ncSplice	gene	93221587	93239043	.	+	.	gene_id "ENSMUSG00000020015"; gene_name "Cdk17"; gene_source "ncSplice"; gene_biotype "protein_coding";
10	ncSplice	transcript	93221587	93239043	.	+	.	gene_id "ENSMUSG00000020015"; transcript_id "mmCircRNA-127"; gene_name "Cdk17"; gene_biotype "protein_coding"; transcript_biotype "circRNA"; oId "ce:circCdk17-257-001"; tissue "ce";
10	ncSplice	exon	93221587	93221643	.	+	.	gene_id "ENSMUSG00000020015"; transcript_id "mmCircRNA-127"; exon_number "1" gene_name "Cdk17"; gene_biotype "protein_coding"; oId "ce:circCdk17-257-001"; tissue "ce";
10	ncSplice	exon	93224936	93225050	.	+	.	gene_id "ENSMUSG00000020015"; transcript_id "mmCircRNA-127"; exon_number "2" gene_name "Cdk17"; gene_biotype "protein_coding"; oId "ce:circCdk17-257-001"; tissue "ce";
10	ncSplice	exon	93226024	93226118	.	+	.	gene_id "ENSMUSG00000020015"; transcript_id "mmCircRNA-127"; exon_number "3" gene_name "Cdk17"; gene_biotype "protein_coding"; oId "ce:circCdk17-257-001"; tissue "ce";
10	ncSplice	exon	93226713	93226775	.	+	.	gene_id "ENSMUSG00000020015"; transcript_id "mmCircRNA-127"; exon_number "4" gene_name "Cdk17"; gene_biotype "protein_coding"; oId "ce:circCdk17-257-001"; tissue "ce";
10	ncSplice	exon	93228645	93228768	.	+	.	gene_id "ENSMUSG00000020015"; transcript_id "mmCircRNA-127"; exon_number "5" gene_name "Cdk17"; gene_biotype "protein_coding"; oId "ce:circCdk17-257-001"; tissue "ce";
10	ncSplice	exon	93232380	93232500	.	+	.	gene_id "ENSMUSG00000020015"; transcript_id "mmCircRNA-127"; exon_number "6" gene_name "Cdk17"; gene_biotype "protein_coding"; oId "ce:circCdk17-257-001"; tissue "ce";
10	ncSplice	exon	93235438	93235535	.	+	.	gene_id "ENSMUSG00000020015"; transcript_id "mmCircRNA-127"; exon_number "7" gene_name "Cdk17"; gene_biotype "protein_coding"; oId "ce:circCdk17-257-001"; tissue "ce";
10	ncSplice	exon	93236027	93236132	.	+	.	gene_id "ENSMUSG00000020015"; transcript_id "mmCircRNA-127"; exon_number "8" gene_name "Cdk17"; gene_biotype "protein_coding"; oId "ce:circCdk17-257-001"; tissue "ce";
10	ncSplice	exon	93236921	93236963	.	+	.	gene_id "ENSMUSG00000020015"; transcript_id "mmCircRNA-127"; exon_number "9" gene_name "Cdk17"; gene_biotype "protein_coding"; oId "ce:circCdk17-257-001"; tissue "ce";
10	ncSplice	exon	93237794	93237884	.	+	.	gene_id "ENSMUSG00000020015"; transcript_id "mmCircRNA-127"; exon_number "10" gene_name "Cdk17"; gene_biotype "protein_coding"; oId "ce:circCdk17-257-001"; tissue "ce";
10	ncSplice	exon	93238966	93239043	.	+	.	gene_id "ENSMUSG00000020015"; transcript_id "mmCircRNA-127"; exon_number "11" gene_name "Cdk17"; gene_biotype "protein_coding"; oId "ce:circCdk17-257-001"; tissue "ce";
10	ncSplice	gene	9798122	9800068	.	-	.	gene_id "ENSMUSG00000019790"; gene_name "Stxbp5"; gene_source "ncSplice"; gene_biotype "protein_coding";
10	ncSplice	transcript	9798122	9800068	.	-	.	gene_id "ENSMUSG00000019790"; transcript_id "mmCircRNA-128"; gene_name "Stxbp5"; gene_biotype "protein_coding"; transcript_biotype "circRNA"; oId "ce:circStxbp5-263-001"; tissue "ce";
10	ncSplice	exon	9798122	9798273	.	-	.	gene_id "ENSMUSG00000019790"; transcript_id "mmCircRNA-128"; exon_number "1" gene_name "Stxbp5"; gene_biotype "protein_coding"; oId "ce:circStxbp5-263-001"; tissue "ce";
10	ncSplice	exon	9799943	9800068	.	-	.	gene_id "ENSMUSG00000019790"; transcript_id "mmCircRNA-128"; exon_number "2" gene_name "Stxbp5"; gene_biotype "protein_coding"; oId "ce:circStxbp5-263-001"; tissue "ce";
11	ncSplice	gene	103046379	103055289	.	+	.	gene_id "ENSMUSG00000020936"; gene_name "Nmt1"; gene_source "ncSplice"; gene_biotype "protein_coding";
11	ncSplice	transcript	103046379	103055289	.	+	.	gene_id "ENSMUSG00000020936"; transcript_id "mmCircRNA-129"; gene_name "Nmt1"; gene_biotype "protein_coding"; transcript_biotype "circRNA"; oId "ce:circNmt1-293-001"; tissue "ce";
11	ncSplice	exon	103046379	103046523	.	+	.	gene_id "ENSMUSG00000020936"; transcript_id "mmCircRNA-129"; exon_number "1" gene_name "Nmt1"; gene_biotype "protein_coding"; oId "ce:circNmt1-293-001"; tissue "ce";
11	ncSplice	exon	103052206	103052324	.	+	.	gene_id "ENSMUSG00000020936"; transcript_id "mmCircRNA-129"; exon_number "2" gene_name "Nmt1"; gene_biotype "protein_coding"; oId "ce:circNmt1-293-001"; tissue "ce";
11	ncSplice	exon	103055198	103055289	.	+	.	gene_id "ENSMUSG00000020936"; transcript_id "mmCircRNA-129"; exon_number "3" gene_name "Nmt1"; gene_biotype "protein_coding"; oId "ce:circNmt1-293-001"; tissue "ce";
11	ncSplice	gene	104423922	104426468	.	-	.	gene_id "ENSMUSG00000018412"; gene_name "Kansl1"; gene_source "ncSplice"; gene_biotype "protein_coding";
11	ncSplice	transcript	104423922	104426468	.	-	.	gene_id "ENSMUSG00000018412"; transcript_id "mmCircRNA-130"; gene_name "Kansl1"; gene_biotype "protein_coding"; transcript_biotype "circRNA"; oId "ce:circKansl1-299-001|ts:circKansl1-237-001"; tissue "ce|ts";
11	ncSplice	exon	104423922	104425293	.	-	.	gene_id "ENSMUSG00000018412"; transcript_id "mmCircRNA-130"; exon_number "1" gene_name "Kansl1"; gene_biotype "protein_coding"; oId "ce:circKansl1-299-001|ts:circKansl1-237-001"; tissue "ce|ts";
11	ncSplice	exon	104426424	104426468	.	-	.	gene_id "ENSMUSG00000018412"; transcript_id "mmCircRNA-130"; exon_number "2" gene_name "Kansl1"; gene_biotype "protein_coding"; oId "ce:circKansl1-299-001|ts:circKansl1-237-001"; tissue "ce|ts";
11	ncSplice	gene	107592706	107620214	.	+	.	gene_id "ENSMUSG00000020721"; gene_name "Helz"; gene_source "ncSplice"; gene_biotype "protein_coding";
11	ncSplice	transcript	107592706	107620214	.	+	.	gene_id "ENSMUSG00000020721"; transcript_id "mmCircRNA-131"; gene_name "Helz"; gene_biotype "protein_coding"; transcript_biotype "circRNA"; oId "ce:circHelz-319-001"; tissue "ce";
11	ncSplice	exon	107592706	107592830	.	+	.	gene_id "ENSMUSG00000020721"; transcript_id "mmCircRNA-131"; exon_number "1" gene_name "Helz"; gene_biotype "protein_coding"; oId "ce:circHelz-319-001"; tissue "ce";
11	ncSplice	exon	107595139	107595195	.	+	.	gene_id "ENSMUSG00000020721"; transcript_id "mmCircRNA-131"; exon_number "2" gene_name "Helz"; gene_biotype "protein_coding"; oId "ce:circHelz-319-001"; tissue "ce";
11	ncSplice	exon	107599150	107599201	.	+	.	gene_id "ENSMUSG00000020721"; transcript_id "mmCircRNA-131"; exon_number "3" gene_name "Helz"; gene_biotype "protein_coding"; oId "ce:circHelz-319-001"; tissue "ce";
11	ncSplice	exon	107600276	107600351	.	+	.	gene_id "ENSMUSG00000020721"; transcript_id "mmCircRNA-131"; exon_number "4" gene_name "Helz"; gene_biotype "protein_coding"; oId "ce:circHelz-319-001"; tissue "ce";
11	ncSplice	exon	107602310	107602508	.	+	.	gene_id "ENSMUSG00000020721"; transcript_id "mmCircRNA-131"; exon_number "5" gene_name "Helz"; gene_biotype "protein_coding"; oId "ce:circHelz-319-001"; tissue "ce";
11	ncSplice	exon	107602936	107603043	.	+	.	gene_id "ENSMUSG00000020721"; transcript_id "mmCircRNA-131"; exon_number "6" gene_name "Helz"; gene_biotype "protein_coding"; oId "ce:circHelz-319-001"; tissue "ce";
11	ncSplice	exon	107604066	107604363	.	+	.	gene_id "ENSMUSG00000020721"; transcript_id "mmCircRNA-131"; exon_number "7" gene_name "Helz"; gene_biotype "protein_coding"; oId "ce:circHelz-319-001"; tissue "ce";
11	ncSplice	exon	107613851	107614118	.	+	.	gene_id "ENSMUSG00000020721"; transcript_id "mmCircRNA-131"; exon_number "8" gene_name "Helz"; gene_biotype "protein_coding"; oId "ce:circHelz-319-001"; tissue "ce";
11	ncSplice	exon	107618983	107619316	.	+	.	gene_id "ENSMUSG00000020721"; transcript_id "mmCircRNA-131"; exon_number "9" gene_name "Helz"; gene_biotype "protein_coding"; oId "ce:circHelz-319-001"; tissue "ce";
11	ncSplice	exon	107620084	107620214	.	+	.	gene_id "ENSMUSG00000020721"; transcript_id "mmCircRNA-131"; exon_number "10" gene_name "Helz"; gene_biotype "protein_coding"; oId "ce:circHelz-319-001"; tissue "ce";
11	ncSplice	gene	108923152	108931579	.	+	.	gene_id "ENSMUSG00000000142"; gene_name "Axin2"; gene_source "ncSplice"; gene_biotype "protein_coding";
11	ncSplice	transcript	108923152	108931579	.	+	.	gene_id "ENSMUSG00000000142"; transcript_id "mmCircRNA-132"; gene_name "Axin2"; gene_biotype "protein_coding"; transcript_biotype "circRNA"; oId "ce:circAxin2-323-001"; tissue "ce";
11	ncSplice	exon	108923152	108924102	.	+	.	gene_id "ENSMUSG00000000142"; transcript_id "mmCircRNA-132"; exon_number "1" gene_name "Axin2"; gene_biotype "protein_coding"; oId "ce:circAxin2-323-001"; tissue "ce";
11	ncSplice	exon	108931439	108931579	.	+	.	gene_id "ENSMUSG00000000142"; transcript_id "mmCircRNA-132"; exon_number "2" gene_name "Axin2"; gene_biotype "protein_coding"; oId "ce:circAxin2-323-001"; tissue "ce";
11	ncSplice	gene	109971685	109977873	.	-	.	gene_id "ENSMUSG00000020620"; gene_name "Abca8b"; gene_source "ncSplice"; gene_biotype "protein_coding";
11	ncSplice	transcript	109971685	109977873	.	-	.	gene_id "ENSMUSG00000020620"; transcript_id "mmCircRNA-133"; gene_name "Abca8b"; gene_biotype "protein_coding"; transcript_biotype "circRNA"; oId "ce:circAbca8b-326-001"; tissue "ce";
11	ncSplice	exon	109971685	109971853	.	-	.	gene_id "ENSMUSG00000020620"; transcript_id "mmCircRNA-133"; exon_number "1" gene_name "Abca8b"; gene_biotype "protein_coding"; oId "ce:circAbca8b-326-001"; tissue "ce";
11	ncSplice	exon	109973671	109973818	.	-	.	gene_id "ENSMUSG00000020620"; transcript_id "mmCircRNA-133"; exon_number "2" gene_name "Abca8b"; gene_biotype "protein_coding"; oId "ce:circAbca8b-326-001"; tissue "ce";
11	ncSplice	exon	109974508	109974693	.	-	.	gene_id "ENSMUSG00000020620"; transcript_id "mmCircRNA-133"; exon_number "3" gene_name "Abca8b"; gene_biotype "protein_coding"; oId "ce:circAbca8b-326-001"; tissue "ce";
11	ncSplice	exon	109974990	109975131	.	-	.	gene_id "ENSMUSG00000020620"; transcript_id "mmCircRNA-133"; exon_number "4" gene_name "Abca8b"; gene_biotype "protein_coding"; oId "ce:circAbca8b-326-001"; tissue "ce";
11	ncSplice	exon	109976437	109976663	.	-	.	gene_id "ENSMUSG00000020620"; transcript_id "mmCircRNA-133"; exon_number "5" gene_name "Abca8b"; gene_biotype "protein_coding"; oId "ce:circAbca8b-326-001"; tissue "ce";
11	ncSplice	exon	109977770	109977873	.	-	.	gene_id "ENSMUSG00000020620"; transcript_id "mmCircRNA-133"; exon_number "6" gene_name "Abca8b"; gene_biotype "protein_coding"; oId "ce:circAbca8b-326-001"; tissue "ce";
11	ncSplice	gene	119151028	119154075	.	-	.	gene_id "ENSMUSG00000039976"; gene_name "Tbc1d16"; gene_source "ncSplice"; gene_biotype "protein_coding";
11	ncSplice	transcript	119151028	119154075	.	-	.	gene_id "ENSMUSG00000039976"; transcript_id "mmCircRNA-134"; gene_name "Tbc1d16"; gene_biotype "protein_coding"; transcript_biotype "circRNA"; oId "ce:circTbc1d16-344-001"; tissue "ce";
11	ncSplice	exon	119151028	119151207	.	-	.	gene_id "ENSMUSG00000039976"; transcript_id "mmCircRNA-134"; exon_number "1" gene_name "Tbc1d16"; gene_biotype "protein_coding"; oId "ce:circTbc1d16-344-001"; tissue "ce";
11	ncSplice	exon	119153889	119154075	.	-	.	gene_id "ENSMUSG00000039976"; transcript_id "mmCircRNA-134"; exon_number "2" gene_name "Tbc1d16"; gene_biotype "protein_coding"; oId "ce:circTbc1d16-344-001"; tissue "ce";
1	ncSplice	gene	119741355	119765922	.	-	.	gene_id "ENSMUSG00000026384"; gene_name "Ptpn4"; gene_source "ncSplice"; gene_biotype "protein_coding";
1	ncSplice	transcript	119741355	119765922	.	-	.	gene_id "ENSMUSG00000026384"; transcript_id "mmCircRNA-135"; gene_name "Ptpn4"; gene_biotype "protein_coding"; transcript_biotype "circRNA"; oId "ce:circPtpn4-375-001|ts:circPtpn4-2368-001"; tissue "ce|ts";
1	ncSplice	exon	119741355	119741443	.	-	.	gene_id "ENSMUSG00000026384"; transcript_id "mmCircRNA-135"; exon_number "1" gene_name "Ptpn4"; gene_biotype "protein_coding"; oId "ce:circPtpn4-375-001|ts:circPtpn4-2368-001"; tissue "ce|ts";
1	ncSplice	exon	119743352	119743439	.	-	.	gene_id "ENSMUSG00000026384"; transcript_id "mmCircRNA-135"; exon_number "2" gene_name "Ptpn4"; gene_biotype "protein_coding"; oId "ce:circPtpn4-375-001|ts:circPtpn4-2368-001"; tissue "ce|ts";
1	ncSplice	exon	119765031	119765151	.	-	.	gene_id "ENSMUSG00000026384"; transcript_id "mmCircRNA-135"; exon_number "3" gene_name "Ptpn4"; gene_biotype "protein_coding"; oId "ce:circPtpn4-375-001|ts:circPtpn4-2368-001"; tissue "ce|ts";
1	ncSplice	exon	119765429	119765481	.	-	.	gene_id "ENSMUSG00000026384"; transcript_id "mmCircRNA-135"; exon_number "4" gene_name "Ptpn4"; gene_biotype "protein_coding"; oId "ce:circPtpn4-375-001|ts:circPtpn4-2368-001"; tissue "ce|ts";
1	ncSplice	exon	119765878	119765922	.	-	.	gene_id "ENSMUSG00000026384"; transcript_id "mmCircRNA-135"; exon_number "5" gene_name "Ptpn4"; gene_biotype "protein_coding"; oId "ce:circPtpn4-375-001|ts:circPtpn4-2368-001"; tissue "ce|ts";
11	ncSplice	gene	19998120	20008477	.	+	.	gene_id "ENSMUSG00000045671"; gene_name "Spred2"; gene_source "ncSplice"; gene_biotype "protein_coding";
11	ncSplice	transcript	19998120	20008477	.	+	.	gene_id "ENSMUSG00000045671"; transcript_id "mmCircRNA-136"; gene_name "Spred2"; gene_biotype "protein_coding"; transcript_biotype "circRNA"; oId "ce:circSpred2-376-002"; tissue "ce";
11	ncSplice	exon	19998120	19998297	.	+	.	gene_id "ENSMUSG00000045671"; transcript_id "mmCircRNA-136"; exon_number "1" gene_name "Spred2"; gene_biotype "protein_coding"; oId "ce:circSpred2-376-002"; tissue "ce";
11	ncSplice	exon	20005782	20005950	.	+	.	gene_id "ENSMUSG00000045671"; transcript_id "mmCircRNA-136"; exon_number "2" gene_name "Spred2"; gene_biotype "protein_coding"; oId "ce:circSpred2-376-002"; tissue "ce";
11	ncSplice	exon	20008413	20008477	.	+	.	gene_id "ENSMUSG00000045671"; transcript_id "mmCircRNA-136"; exon_number "3" gene_name "Spred2"; gene_biotype "protein_coding"; oId "ce:circSpred2-376-002"; tissue "ce";
11	ncSplice	gene	20703711	20712315	.	-	.	gene_id "ENSMUSG00000049659"; gene_name "Aftph"; gene_source "ncSplice"; gene_biotype "protein_coding";
11	ncSplice	transcript	20703711	20712315	.	-	.	gene_id "ENSMUSG00000049659"; transcript_id "mmCircRNA-137"; gene_name "Aftph"; gene_biotype "protein_coding"; transcript_biotype "circRNA"; oId "ce:circAftph-379-001"; tissue "ce";
11	ncSplice	exon	20703711	20703833	.	-	.	gene_id "ENSMUSG00000049659"; transcript_id "mmCircRNA-137"; exon_number "1" gene_name "Aftph"; gene_biotype "protein_coding"; oId "ce:circAftph-379-001"; tissue "ce";
11	ncSplice	exon	20708681	20708737	.	-	.	gene_id "ENSMUSG00000049659"; transcript_id "mmCircRNA-137"; exon_number "2" gene_name "Aftph"; gene_biotype "protein_coding"; oId "ce:circAftph-379-001"; tissue "ce";
11	ncSplice	exon	20709620	20709746	.	-	.	gene_id "ENSMUSG00000049659"; transcript_id "mmCircRNA-137"; exon_number "3" gene_name "Aftph"; gene_biotype "protein_coding"; oId "ce:circAftph-379-001"; tissue "ce";
11	ncSplice	exon	20712164	20712315	.	-	.	gene_id "ENSMUSG00000049659"; transcript_id "mmCircRNA-137"; exon_number "4" gene_name "Aftph"; gene_biotype "protein_coding"; oId "ce:circAftph-379-001"; tissue "ce";
11	ncSplice	gene	22053432	22068506	.	-	.	gene_id "ENSMUSG00000042302"; gene_name "Ehbp1"; gene_source "ncSplice"; gene_biotype "protein_coding";
11	ncSplice	transcript	22053432	22068506	.	-	.	gene_id "ENSMUSG00000042302"; transcript_id "mmCircRNA-138"; gene_name "Ehbp1"; gene_biotype "protein_coding"; transcript_biotype "circRNA"; oId "ce:circEhbp1-392-001"; tissue "ce";
11	ncSplice	exon	22053432	22053555	.	-	.	gene_id "ENSMUSG00000042302"; transcript_id "mmCircRNA-138"; exon_number "1" gene_name "Ehbp1"; gene_biotype "protein_coding"; oId "ce:circEhbp1-392-001"; tissue "ce";
11	ncSplice	exon	22056530	22056627	.	-	.	gene_id "ENSMUSG00000042302"; transcript_id "mmCircRNA-138"; exon_number "2" gene_name "Ehbp1"; gene_biotype "protein_coding"; oId "ce:circEhbp1-392-001"; tissue "ce";
11	ncSplice	exon	22056783	22056921	.	-	.	gene_id "ENSMUSG00000042302"; transcript_id "mmCircRNA-138"; exon_number "3" gene_name "Ehbp1"; gene_biotype "protein_coding"; oId "ce:circEhbp1-392-001"; tissue "ce";
11	ncSplice	exon	22059137	22059261	.	-	.	gene_id "ENSMUSG00000042302"; transcript_id "mmCircRNA-138"; exon_number "4" gene_name "Ehbp1"; gene_biotype "protein_coding"; oId "ce:circEhbp1-392-001"; tissue "ce";
11	ncSplice	exon	22062780	22062887	.	-	.	gene_id "ENSMUSG00000042302"; transcript_id "mmCircRNA-138"; exon_number "5" gene_name "Ehbp1"; gene_biotype "protein_coding"; oId "ce:circEhbp1-392-001"; tissue "ce";
11	ncSplice	exon	22068359	22068506	.	-	.	gene_id "ENSMUSG00000042302"; transcript_id "mmCircRNA-138"; exon_number "6" gene_name "Ehbp1"; gene_biotype "protein_coding"; oId "ce:circEhbp1-392-001"; tissue "ce";
1	ncSplice	gene	128151744	128153399	.	+	.	gene_id "ENSMUSG00000056211"; gene_name "R3hdm1"; gene_source "ncSplice"; gene_biotype "protein_coding";
1	ncSplice	transcript	128151744	128153399	.	+	.	gene_id "ENSMUSG00000056211"; transcript_id "mmCircRNA-139"; gene_name "R3hdm1"; gene_biotype "protein_coding"; transcript_biotype "circRNA"; oId "ce:circR3hdm1-410-001"; tissue "ce";
1	ncSplice	exon	128151744	128151952	.	+	.	gene_id "ENSMUSG00000056211"; transcript_id "mmCircRNA-139"; exon_number "1" gene_name "R3hdm1"; gene_biotype "protein_coding"; oId "ce:circR3hdm1-410-001"; tissue "ce";
1	ncSplice	exon	128153189	128153399	.	+	.	gene_id "ENSMUSG00000056211"; transcript_id "mmCircRNA-139"; exon_number "2" gene_name "R3hdm1"; gene_biotype "protein_coding"; oId "ce:circR3hdm1-410-001"; tissue "ce";
11	ncSplice	gene	31055458	31061586	.	+	.	gene_id "ENSMUSG00000020305"; gene_name "Asb3"; gene_source "ncSplice"; gene_biotype "protein_coding";
11	ncSplice	transcript	31055458	31061586	.	+	.	gene_id "ENSMUSG00000020305"; transcript_id "mmCircRNA-140"; gene_name "Asb3"; gene_biotype "protein_coding"; transcript_biotype "circRNA"; oId "ce:circAsb3-427-001|ts:circAsb3-346-001"; tissue "ce|ts";
11	ncSplice	exon	31055458	31055570	.	+	.	gene_id "ENSMUSG00000020305"; transcript_id "mmCircRNA-140"; exon_number "1" gene_name "Asb3"; gene_biotype "protein_coding"; oId "ce:circAsb3-427-001|ts:circAsb3-346-001"; tissue "ce|ts";
11	ncSplice	exon	31056102	31056237	.	+	.	gene_id "ENSMUSG00000020305"; transcript_id "mmCircRNA-140"; exon_number "2" gene_name "Asb3"; gene_biotype "protein_coding"; oId "ce:circAsb3-427-001|ts:circAsb3-346-001"; tissue "ce|ts";
11	ncSplice	exon	31058822	31058999	.	+	.	gene_id "ENSMUSG00000020305"; transcript_id "mmCircRNA-140"; exon_number "3" gene_name "Asb3"; gene_biotype "protein_coding"; oId "ce:circAsb3-427-001|ts:circAsb3-346-001"; tissue "ce|ts";
11	ncSplice	exon	31061389	31061586	.	+	.	gene_id "ENSMUSG00000020305"; transcript_id "mmCircRNA-140"; exon_number "4" gene_name "Asb3"; gene_biotype "protein_coding"; oId "ce:circAsb3-427-001|ts:circAsb3-346-001"; tissue "ce|ts";
1	ncSplice	gene	131344349	131356905	.	-	.	gene_id "ENSMUSG00000026425"; gene_name "Srgap2"; gene_source "ncSplice"; gene_biotype "protein_coding";
1	ncSplice	transcript	131344349	131356905	.	-	.	gene_id "ENSMUSG00000026425"; transcript_id "mmCircRNA-141"; gene_name "Srgap2"; gene_biotype "protein_coding"; transcript_biotype "circRNA"; oId "ce:circSrgap2-431-001"; tissue "ce";
1	ncSplice	exon	131344349	131344546	.	-	.	gene_id "ENSMUSG00000026425"; transcript_id "mmCircRNA-141"; exon_number "1" gene_name "Srgap2"; gene_biotype "protein_coding"; oId "ce:circSrgap2-431-001"; tissue "ce";
1	ncSplice	exon	131345762	131345863	.	-	.	gene_id "ENSMUSG00000026425"; transcript_id "mmCircRNA-141"; exon_number "2" gene_name "Srgap2"; gene_biotype "protein_coding"; oId "ce:circSrgap2-431-001"; tissue "ce";
1	ncSplice	exon	131349452	131349676	.	-	.	gene_id "ENSMUSG00000026425"; transcript_id "mmCircRNA-141"; exon_number "3" gene_name "Srgap2"; gene_biotype "protein_coding"; oId "ce:circSrgap2-431-001"; tissue "ce";
1	ncSplice	exon	131355511	131355639	.	-	.	gene_id "ENSMUSG00000026425"; transcript_id "mmCircRNA-141"; exon_number "4" gene_name "Srgap2"; gene_biotype "protein_coding"; oId "ce:circSrgap2-431-001"; tissue "ce";
1	ncSplice	exon	131356690	131356905	.	-	.	gene_id "ENSMUSG00000026425"; transcript_id "mmCircRNA-141"; exon_number "5" gene_name "Srgap2"; gene_biotype "protein_coding"; oId "ce:circSrgap2-431-001"; tissue "ce";
1	ncSplice	gene	139040000	139062971	.	+	.	gene_id "ENSMUSG00000056268"; gene_name "Dennd1b"; gene_source "ncSplice"; gene_biotype "protein_coding";
1	ncSplice	transcript	139040000	139062971	.	+	.	gene_id "ENSMUSG00000056268"; transcript_id "mmCircRNA-142"; gene_name "Dennd1b"; gene_biotype "protein_coding"; transcript_biotype "circRNA"; oId "ce:circDennd1b-461-002|ts:circDennd1b-2398-006"; tissue "ce|ts";
1	ncSplice	exon	139040000	139040049	.	+	.	gene_id "ENSMUSG00000056268"; transcript_id "mmCircRNA-142"; exon_number "1" gene_name "Dennd1b"; gene_biotype "protein_coding"; oId "ce:circDennd1b-461-002|ts:circDennd1b-2398-006"; tissue "ce|ts";
1	ncSplice	exon	139041924	139042043	.	+	.	gene_id "ENSMUSG00000056268"; transcript_id "mmCircRNA-142"; exon_number "2" gene_name "Dennd1b"; gene_biotype "protein_coding"; oId "ce:circDennd1b-461-002|ts:circDennd1b-2398-006"; tissue "ce|ts";
1	ncSplice	exon	139053346	139053415	.	+	.	gene_id "ENSMUSG00000056268"; transcript_id "mmCircRNA-142"; exon_number "3" gene_name "Dennd1b"; gene_biotype "protein_coding"; oId "ce:circDennd1b-461-002|ts:circDennd1b-2398-006"; tissue "ce|ts";
1	ncSplice	exon	139054541	139054621	.	+	.	gene_id "ENSMUSG00000056268"; transcript_id "mmCircRNA-142"; exon_number "4" gene_name "Dennd1b"; gene_biotype "protein_coding"; oId "ce:circDennd1b-461-002|ts:circDennd1b-2398-006"; tissue "ce|ts";
1	ncSplice	exon	139060275	139060328	.	+	.	gene_id "ENSMUSG00000056268"; transcript_id "mmCircRNA-142"; exon_number "5" gene_name "Dennd1b"; gene_biotype "protein_coding"; oId "ce:circDennd1b-461-002|ts:circDennd1b-2398-006"; tissue "ce|ts";
1	ncSplice	exon	139062861	139062971	.	+	.	gene_id "ENSMUSG00000056268"; transcript_id "mmCircRNA-142"; exon_number "6" gene_name "Dennd1b"; gene_biotype "protein_coding"; oId "ce:circDennd1b-461-002|ts:circDennd1b-2398-006"; tissue "ce|ts";
11	ncSplice	gene	4517741	4531305	.	-	.	gene_id "ENSMUSG00000034354"; gene_name "Mtmr3"; gene_source "ncSplice"; gene_biotype "protein_coding";
11	ncSplice	transcript	4517741	4531305	.	-	.	gene_id "ENSMUSG00000034354"; transcript_id "mmCircRNA-143"; gene_name "Mtmr3"; gene_biotype "protein_coding"; transcript_biotype "circRNA"; oId "ce:circMtmr3-475-001|ts:circMtmr3-373-001"; tissue "ce|ts";
11	ncSplice	exon	4517741	4517907	.	-	.	gene_id "ENSMUSG00000034354"; transcript_id "mmCircRNA-143"; exon_number "1" gene_name "Mtmr3"; gene_biotype "protein_coding"; oId "ce:circMtmr3-475-001|ts:circMtmr3-373-001"; tissue "ce|ts";
11	ncSplice	exon	4520832	4520914	.	-	.	gene_id "ENSMUSG00000034354"; transcript_id "mmCircRNA-143"; exon_number "2" gene_name "Mtmr3"; gene_biotype "protein_coding"; oId "ce:circMtmr3-475-001|ts:circMtmr3-373-001"; tissue "ce|ts";
11	ncSplice	exon	4527836	4527952	.	-	.	gene_id "ENSMUSG00000034354"; transcript_id "mmCircRNA-143"; exon_number "3" gene_name "Mtmr3"; gene_biotype "protein_coding"; oId "ce:circMtmr3-475-001|ts:circMtmr3-373-001"; tissue "ce|ts";
11	ncSplice	exon	4528317	4528406	.	-	.	gene_id "ENSMUSG00000034354"; transcript_id "mmCircRNA-143"; exon_number "4" gene_name "Mtmr3"; gene_biotype "protein_coding"; oId "ce:circMtmr3-475-001|ts:circMtmr3-373-001"; tissue "ce|ts";
11	ncSplice	exon	4531222	4531305	.	-	.	gene_id "ENSMUSG00000034354"; transcript_id "mmCircRNA-143"; exon_number "5" gene_name "Mtmr3"; gene_biotype "protein_coding"; oId "ce:circMtmr3-475-001|ts:circMtmr3-373-001"; tissue "ce|ts";
11	ncSplice	gene	49212695	49215945	.	+	.	gene_id "ENSMUSG00000046311"; gene_name "Zfp62"; gene_source "ncSplice"; gene_biotype "protein_coding";
11	ncSplice	transcript	49212695	49215945	.	+	.	gene_id "ENSMUSG00000046311"; transcript_id "mmCircRNA-144"; gene_name "Zfp62"; gene_biotype "protein_coding"; transcript_biotype "circRNA"; oId "ce:circZfp62-489-003"; tissue "ce";
11	ncSplice	exon	49212695	49212776	.	+	.	gene_id "ENSMUSG00000046311"; transcript_id "mmCircRNA-144"; exon_number "1" gene_name "Zfp62"; gene_biotype "protein_coding"; oId "ce:circZfp62-489-003"; tissue "ce";
11	ncSplice	exon	49213590	49213642	.	+	.	gene_id "ENSMUSG00000046311"; transcript_id "mmCircRNA-144"; exon_number "2" gene_name "Zfp62"; gene_biotype "protein_coding"; oId "ce:circZfp62-489-003"; tissue "ce";
11	ncSplice	exon	49214555	49214654	.	+	.	gene_id "ENSMUSG00000046311"; transcript_id "mmCircRNA-144"; exon_number "3" gene_name "Zfp62"; gene_biotype "protein_coding"; oId "ce:circZfp62-489-003"; tissue "ce";
11	ncSplice	exon	49215064	49215945	.	+	.	gene_id "ENSMUSG00000046311"; transcript_id "mmCircRNA-144"; exon_number "4" gene_name "Zfp62"; gene_biotype "protein_coding"; oId "ce:circZfp62-489-003"; tissue "ce";
1	ncSplice	gene	150406462	150407577	.	+	.	gene_id "ENSMUSG00000006005"; gene_name "Tpr"; gene_source "ncSplice"; gene_biotype "protein_coding";
1	ncSplice	transcript	150406462	150407577	.	+	.	gene_id "ENSMUSG00000006005"; transcript_id "mmCircRNA-145"; gene_name "Tpr"; gene_biotype "protein_coding"; transcript_biotype "circRNA"; oId "ce:circTpr-496-001|ts:circTpr-2415-001"; tissue "ce|ts";
1	ncSplice	exon	150406462	150406554	.	+	.	gene_id "ENSMUSG00000006005"; transcript_id "mmCircRNA-145"; exon_number "1" gene_name "Tpr"; gene_biotype "protein_coding"; oId "ce:circTpr-496-001|ts:circTpr-2415-001"; tissue "ce|ts";
1	ncSplice	exon	150407329	150407409	.	+	.	gene_id "ENSMUSG00000006005"; transcript_id "mmCircRNA-145"; exon_number "2" gene_name "Tpr"; gene_biotype "protein_coding"; oId "ce:circTpr-496-001|ts:circTpr-2415-001"; tissue "ce|ts";
1	ncSplice	exon	150407490	150407577	.	+	.	gene_id "ENSMUSG00000006005"; transcript_id "mmCircRNA-145"; exon_number "3" gene_name "Tpr"; gene_biotype "protein_coding"; oId "ce:circTpr-496-001|ts:circTpr-2415-001"; tissue "ce|ts";
1	ncSplice	gene	151397206	151403896	.	-	.	gene_id "ENSMUSG00000052748"; gene_name "Swt1"; gene_source "ncSplice"; gene_biotype "protein_coding";
1	ncSplice	transcript	151397206	151403896	.	-	.	gene_id "ENSMUSG00000052748"; transcript_id "mmCircRNA-146"; gene_name "Swt1"; gene_biotype "protein_coding"; transcript_biotype "circRNA"; oId "ce:circSwt1-500-001|ts:circSwt1-2419-001"; tissue "ce|ts";
1	ncSplice	exon	151397206	151397351	.	-	.	gene_id "ENSMUSG00000052748"; transcript_id "mmCircRNA-146"; exon_number "1" gene_name "Swt1"; gene_biotype "protein_coding"; oId "ce:circSwt1-500-001|ts:circSwt1-2419-001"; tissue "ce|ts";
1	ncSplice	exon	151401080	151401173	.	-	.	gene_id "ENSMUSG00000052748"; transcript_id "mmCircRNA-146"; exon_number "2" gene_name "Swt1"; gene_biotype "protein_coding"; oId "ce:circSwt1-500-001|ts:circSwt1-2419-001"; tissue "ce|ts";
1	ncSplice	exon	151402955	151403143	.	-	.	gene_id "ENSMUSG00000052748"; transcript_id "mmCircRNA-146"; exon_number "3" gene_name "Swt1"; gene_biotype "protein_coding"; oId "ce:circSwt1-500-001|ts:circSwt1-2419-001"; tissue "ce|ts";
1	ncSplice	exon	151403795	151403896	.	-	.	gene_id "ENSMUSG00000052748"; transcript_id "mmCircRNA-146"; exon_number "4" gene_name "Swt1"; gene_biotype "protein_coding"; oId "ce:circSwt1-500-001|ts:circSwt1-2419-001"; tissue "ce|ts";
1	ncSplice	gene	151476140	151478625	.	-	.	gene_id "ENSMUSG00000026484"; gene_name "Rnf2"; gene_source "ncSplice"; gene_biotype "protein_coding";
1	ncSplice	transcript	151476140	151478625	.	-	.	gene_id "ENSMUSG00000026484"; transcript_id "mmCircRNA-147"; gene_name "Rnf2"; gene_biotype "protein_coding"; transcript_biotype "circRNA"; oId "ce:circRnf2-502-001"; tissue "ce";
1	ncSplice	exon	151476140	151476355	.	-	.	gene_id "ENSMUSG00000026484"; transcript_id "mmCircRNA-147"; exon_number "1" gene_name "Rnf2"; gene_biotype "protein_coding"; oId "ce:circRnf2-502-001"; tissue "ce";
1	ncSplice	exon	151476872	151477032	.	-	.	gene_id "ENSMUSG00000026484"; transcript_id "mmCircRNA-147"; exon_number "2" gene_name "Rnf2"; gene_biotype "protein_coding"; oId "ce:circRnf2-502-001"; tissue "ce";
1	ncSplice	exon	151478537	151478625	.	-	.	gene_id "ENSMUSG00000026484"; transcript_id "mmCircRNA-147"; exon_number "3" gene_name "Rnf2"; gene_biotype "protein_coding"; oId "ce:circRnf2-502-001"; tissue "ce";
11	ncSplice	gene	52236837	52245121	.	+	.	gene_id "ENSMUSG00000036309"; gene_name "Skp1a"; gene_source "ncSplice"; gene_biotype "protein_coding";
11	ncSplice	transcript	52236837	52245121	.	+	.	gene_id "ENSMUSG00000036309"; transcript_id "mmCircRNA-148"; gene_name "Skp1a"; gene_biotype "protein_coding"; transcript_biotype "circRNA"; oId "ce:circSkp1a-511-001"; tissue "ce";
11	ncSplice	exon	52236837	52236933	.	+	.	gene_id "ENSMUSG00000036309"; transcript_id "mmCircRNA-148"; exon_number "1" gene_name "Skp1a"; gene_biotype "protein_coding"; oId "ce:circSkp1a-511-001"; tissue "ce";
11	ncSplice	exon	52237384	52237472	.	+	.	gene_id "ENSMUSG00000036309"; transcript_id "mmCircRNA-148"; exon_number "2" gene_name "Skp1a"; gene_biotype "protein_coding"; oId "ce:circSkp1a-511-001"; tissue "ce";
11	ncSplice	exon	52242587	52245121	.	+	.	gene_id "ENSMUSG00000036309"; transcript_id "mmCircRNA-148"; exon_number "3" gene_name "Skp1a"; gene_biotype "protein_coding"; oId "ce:circSkp1a-511-001"; tissue "ce";
11	ncSplice	gene	53368660	53380672	.	+	.	gene_id "ENSMUSG00000049470"; gene_name "Aff4"; gene_source "ncSplice"; gene_biotype "protein_coding";
11	ncSplice	transcript	53368660	53380672	.	+	.	gene_id "ENSMUSG00000049470"; transcript_id "mmCircRNA-149"; gene_name "Aff4"; gene_biotype "protein_coding"; transcript_biotype "circRNA"; oId "ce:circAff4-518-001"; tissue "ce";
11	ncSplice	exon	53368660	53368786	.	+	.	gene_id "ENSMUSG00000049470"; transcript_id "mmCircRNA-149"; exon_number "1" gene_name "Aff4"; gene_biotype "protein_coding"; oId "ce:circAff4-518-001"; tissue "ce";
11	ncSplice	exon	53372278	53373057	.	+	.	gene_id "ENSMUSG00000049470"; transcript_id "mmCircRNA-149"; exon_number "2" gene_name "Aff4"; gene_biotype "protein_coding"; oId "ce:circAff4-518-001"; tissue "ce";
11	ncSplice	exon	53375589	53380672	.	+	.	gene_id "ENSMUSG00000049470"; transcript_id "mmCircRNA-149"; exon_number "3" gene_name "Aff4"; gene_biotype "protein_coding"; oId "ce:circAff4-518-001"; tissue "ce";
11	ncSplice	gene	54543579	54568496	.	+	.	gene_id "ENSMUSG00000037533"; gene_name "Rapgef6"; gene_source "ncSplice"; gene_biotype "protein_coding";
11	ncSplice	transcript	54543579	54568496	.	+	.	gene_id "ENSMUSG00000037533"; transcript_id "mmCircRNA-150"; gene_name "Rapgef6"; gene_biotype "protein_coding"; transcript_biotype "circRNA"; oId "ce:circRapgef6-522-001|ts:circRapgef6-400-001"; tissue "ce|ts";
11	ncSplice	exon	54543579	54543649	.	+	.	gene_id "ENSMUSG00000037533"; transcript_id "mmCircRNA-150"; exon_number "1" gene_name "Rapgef6"; gene_biotype "protein_coding"; oId "ce:circRapgef6-522-001|ts:circRapgef6-400-001"; tissue "ce|ts";
11	ncSplice	exon	54546373	54546429	.	+	.	gene_id "ENSMUSG00000037533"; transcript_id "mmCircRNA-150"; exon_number "2" gene_name "Rapgef6"; gene_biotype "protein_coding"; oId "ce:circRapgef6-522-001|ts:circRapgef6-400-001"; tissue "ce|ts";
11	ncSplice	exon	54552790	54552873	.	+	.	gene_id "ENSMUSG00000037533"; transcript_id "mmCircRNA-150"; exon_number "3" gene_name "Rapgef6"; gene_biotype "protein_coding"; oId "ce:circRapgef6-522-001|ts:circRapgef6-400-001"; tissue "ce|ts";
11	ncSplice	exon	54561325	54561394	.	+	.	gene_id "ENSMUSG00000037533"; transcript_id "mmCircRNA-150"; exon_number "4" gene_name "Rapgef6"; gene_biotype "protein_coding"; oId "ce:circRapgef6-522-001|ts:circRapgef6-400-001"; tissue "ce|ts";
11	ncSplice	exon	54568353	54568496	.	+	.	gene_id "ENSMUSG00000037533"; transcript_id "mmCircRNA-150"; exon_number "5" gene_name "Rapgef6"; gene_biotype "protein_coding"; oId "ce:circRapgef6-522-001|ts:circRapgef6-400-001"; tissue "ce|ts";
1	ncSplice	gene	155173986	155197435	.	+	.	gene_id "ENSMUSG00000026470"; gene_name "Stx6"; gene_source "ncSplice"; gene_biotype "protein_coding";
1	ncSplice	transcript	155173986	155197435	.	+	.	gene_id "ENSMUSG00000026470"; transcript_id "mmCircRNA-151"; gene_name "Stx6"; gene_biotype "protein_coding"; transcript_biotype "circRNA"; oId "ce:circStx6-527-001"; tissue "ce";
1	ncSplice	exon	155173986	155174155	.	+	.	gene_id "ENSMUSG00000026470"; transcript_id "mmCircRNA-151"; exon_number "1" gene_name "Stx6"; gene_biotype "protein_coding"; oId "ce:circStx6-527-001"; tissue "ce";
1	ncSplice	exon	155177854	155177948	.	+	.	gene_id "ENSMUSG00000026470"; transcript_id "mmCircRNA-151"; exon_number "2" gene_name "Stx6"; gene_biotype "protein_coding"; oId "ce:circStx6-527-001"; tissue "ce";
1	ncSplice	exon	155187778	155187840	.	+	.	gene_id "ENSMUSG00000026470"; transcript_id "mmCircRNA-151"; exon_number "3" gene_name "Stx6"; gene_biotype "protein_coding"; oId "ce:circStx6-527-001"; tissue "ce";
1	ncSplice	exon	155191429	155191554	.	+	.	gene_id "ENSMUSG00000026470"; transcript_id "mmCircRNA-151"; exon_number "4" gene_name "Stx6"; gene_biotype "protein_coding"; oId "ce:circStx6-527-001"; tissue "ce";
1	ncSplice	exon	155193219	155193325	.	+	.	gene_id "ENSMUSG00000026470"; transcript_id "mmCircRNA-151"; exon_number "5" gene_name "Stx6"; gene_biotype "protein_coding"; oId "ce:circStx6-527-001"; tissue "ce";
1	ncSplice	exon	155197341	155197435	.	+	.	gene_id "ENSMUSG00000026470"; transcript_id "mmCircRNA-151"; exon_number "6" gene_name "Stx6"; gene_biotype "protein_coding"; oId "ce:circStx6-527-001"; tissue "ce";
1	ncSplice	gene	155601454	155624958	.	+	.	gene_id "ENSMUSG00000033701"; gene_name "Acbd6"; gene_source "ncSplice"; gene_biotype "protein_coding";
1	ncSplice	transcript	155601454	155624958	.	+	.	gene_id "ENSMUSG00000033701"; transcript_id "mmCircRNA-152"; gene_name "Acbd6"; gene_biotype "protein_coding"; transcript_biotype "circRNA"; oId "ce:circAcbd6-530-001"; tissue "ce";
1	ncSplice	exon	155601454	155601536	.	+	.	gene_id "ENSMUSG00000033701"; transcript_id "mmCircRNA-152"; exon_number "1" gene_name "Acbd6"; gene_biotype "protein_coding"; oId "ce:circAcbd6-530-001"; tissue "ce";
1	ncSplice	exon	155615867	155615972	.	+	.	gene_id "ENSMUSG00000033701"; transcript_id "mmCircRNA-152"; exon_number "2" gene_name "Acbd6"; gene_biotype "protein_coding"; oId "ce:circAcbd6-530-001"; tissue "ce";
1	ncSplice	exon	155624869	155624958	.	+	.	gene_id "ENSMUSG00000033701"; transcript_id "mmCircRNA-152"; exon_number "3" gene_name "Acbd6"; gene_biotype "protein_coding"; oId "ce:circAcbd6-530-001"; tissue "ce";
1	ncSplice	gene	155953154	155962560	.	-	.	gene_id "ENSMUSG00000033671"; gene_name "Cep350"; gene_source "ncSplice"; gene_biotype "protein_coding";
1	ncSplice	transcript	155953154	155962560	.	-	.	gene_id "ENSMUSG00000033671"; transcript_id "mmCircRNA-153"; gene_name "Cep350"; gene_biotype "protein_coding"; transcript_biotype "circRNA"; oId "ce:circCep350-532-001|ts:circCep350-2434-001"; tissue "ce|ts";
1	ncSplice	exon	155953154	155953767	.	-	.	gene_id "ENSMUSG00000033671"; transcript_id "mmCircRNA-153"; exon_number "1" gene_name "Cep350"; gene_biotype "protein_coding"; oId "ce:circCep350-532-001|ts:circCep350-2434-001"; tissue "ce|ts";
1	ncSplice	exon	155958561	155958720	.	-	.	gene_id "ENSMUSG00000033671"; transcript_id "mmCircRNA-153"; exon_number "2" gene_name "Cep350"; gene_biotype "protein_coding"; oId "ce:circCep350-532-001|ts:circCep350-2434-001"; tissue "ce|ts";
1	ncSplice	exon	155959720	155959831	.	-	.	gene_id "ENSMUSG00000033671"; transcript_id "mmCircRNA-153"; exon_number "3" gene_name "Cep350"; gene_biotype "protein_coding"; oId "ce:circCep350-532-001|ts:circCep350-2434-001"; tissue "ce|ts";
1	ncSplice	exon	155961144	155961187	.	-	.	gene_id "ENSMUSG00000033671"; transcript_id "mmCircRNA-153"; exon_number "4" gene_name "Cep350"; gene_biotype "protein_coding"; oId "ce:circCep350-532-001|ts:circCep350-2434-001"; tissue "ce|ts";
1	ncSplice	exon	155962475	155962560	.	-	.	gene_id "ENSMUSG00000033671"; transcript_id "mmCircRNA-153"; exon_number "5" gene_name "Cep350"; gene_biotype "protein_coding"; oId "ce:circCep350-532-001|ts:circCep350-2434-001"; tissue "ce|ts";
1	ncSplice	gene	158572952	158580361	.	+	.	gene_id "ENSMUSG00000026587"; gene_name "Astn1"; gene_source "ncSplice"; gene_biotype "protein_coding";
1	ncSplice	transcript	158572952	158580361	.	+	.	gene_id "ENSMUSG00000026587"; transcript_id "mmCircRNA-154"; gene_name "Astn1"; gene_biotype "protein_coding"; transcript_biotype "circRNA"; oId "ce:circAstn1-540-001"; tissue "ce";
1	ncSplice	exon	158572952	158573026	.	+	.	gene_id "ENSMUSG00000026587"; transcript_id "mmCircRNA-154"; exon_number "1" gene_name "Astn1"; gene_biotype "protein_coding"; oId "ce:circAstn1-540-001"; tissue "ce";
1	ncSplice	exon	158579581	158579718	.	+	.	gene_id "ENSMUSG00000026587"; transcript_id "mmCircRNA-154"; exon_number "2" gene_name "Astn1"; gene_biotype "protein_coding"; oId "ce:circAstn1-540-001"; tissue "ce";
1	ncSplice	exon	158580211	158580361	.	+	.	gene_id "ENSMUSG00000026587"; transcript_id "mmCircRNA-154"; exon_number "3" gene_name "Astn1"; gene_biotype "protein_coding"; oId "ce:circAstn1-540-001"; tissue "ce";
11	ncSplice	gene	60270318	60275002	.	-	.	gene_id "ENSMUSG00000000538"; gene_name "Tom1l2"; gene_source "ncSplice"; gene_biotype "protein_coding";
11	ncSplice	transcript	60270318	60275002	.	-	.	gene_id "ENSMUSG00000000538"; transcript_id "mmCircRNA-155"; gene_name "Tom1l2"; gene_biotype "protein_coding"; transcript_biotype "circRNA"; oId "ce:circTom1l2-550-001"; tissue "ce";
11	ncSplice	exon	60270318	60270467	.	-	.	gene_id "ENSMUSG00000000538"; transcript_id "mmCircRNA-155"; exon_number "1" gene_name "Tom1l2"; gene_biotype "protein_coding"; oId "ce:circTom1l2-550-001"; tissue "ce";
11	ncSplice	exon	60274924	60275002	.	-	.	gene_id "ENSMUSG00000000538"; transcript_id "mmCircRNA-155"; exon_number "2" gene_name "Tom1l2"; gene_biotype "protein_coding"; oId "ce:circTom1l2-550-001"; tissue "ce";
1	ncSplice	gene	160627215	160724189	.	-	.	gene_id "ENSMUSG00000026721"; gene_name "Rabgap1l"; gene_source "ncSplice"; gene_biotype "protein_coding";
1	ncSplice	transcript	160627215	160724189	.	-	.	gene_id "ENSMUSG00000026721"; transcript_id "mmCircRNA-156"; gene_name "Rabgap1l"; gene_biotype "protein_coding"; transcript_biotype "circRNA"; oId "ce:circRabgap1l-556-001"; tissue "ce";
1	ncSplice	exon	160627215	160627365	.	-	.	gene_id "ENSMUSG00000026721"; transcript_id "mmCircRNA-156"; exon_number "1" gene_name "Rabgap1l"; gene_biotype "protein_coding"; oId "ce:circRabgap1l-556-001"; tissue "ce";
1	ncSplice	exon	160645308	160645401	.	-	.	gene_id "ENSMUSG00000026721"; transcript_id "mmCircRNA-156"; exon_number "2" gene_name "Rabgap1l"; gene_biotype "protein_coding"; oId "ce:circRabgap1l-556-001"; tissue "ce";
1	ncSplice	exon	160682041	160682182	.	-	.	gene_id "ENSMUSG00000026721"; transcript_id "mmCircRNA-156"; exon_number "3" gene_name "Rabgap1l"; gene_biotype "protein_coding"; oId "ce:circRabgap1l-556-001"; tissue "ce";
1	ncSplice	exon	160700712	160700878	.	-	.	gene_id "ENSMUSG00000026721"; transcript_id "mmCircRNA-156"; exon_number "4" gene_name "Rabgap1l"; gene_biotype "protein_coding"; oId "ce:circRabgap1l-556-001"; tissue "ce";
1	ncSplice	exon	160702358	160702460	.	-	.	gene_id "ENSMUSG00000026721"; transcript_id "mmCircRNA-156"; exon_number "5" gene_name "Rabgap1l"; gene_biotype "protein_coding"; oId "ce:circRabgap1l-556-001"; tissue "ce";
1	ncSplice	exon	160710147	160710213	.	-	.	gene_id "ENSMUSG00000026721"; transcript_id "mmCircRNA-156"; exon_number "6" gene_name "Rabgap1l"; gene_biotype "protein_coding"; oId "ce:circRabgap1l-556-001"; tissue "ce";
1	ncSplice	exon	160722133	160722243	.	-	.	gene_id "ENSMUSG00000026721"; transcript_id "mmCircRNA-156"; exon_number "7" gene_name "Rabgap1l"; gene_biotype "protein_coding"; oId "ce:circRabgap1l-556-001"; tissue "ce";
1	ncSplice	exon	160724032	160724189	.	-	.	gene_id "ENSMUSG00000026721"; transcript_id "mmCircRNA-156"; exon_number "8" gene_name "Rabgap1l"; gene_biotype "protein_coding"; oId "ce:circRabgap1l-556-001"; tissue "ce";
1	ncSplice	gene	160700712	160702460	.	-	.	gene_id "ENSMUSG00000026721"; gene_name "Rabgap1l"; gene_source "ncSplice"; gene_biotype "protein_coding";
1	ncSplice	transcript	160700712	160702460	.	-	.	gene_id "ENSMUSG00000026721"; transcript_id "mmCircRNA-157"; gene_name "Rabgap1l"; gene_biotype "protein_coding"; transcript_biotype "circRNA"; oId "ce:circRabgap1l-559-001|ts:circRabgap1l-2453-001"; tissue "ce|ts";
1	ncSplice	exon	160700712	160700878	.	-	.	gene_id "ENSMUSG00000026721"; transcript_id "mmCircRNA-157"; exon_number "1" gene_name "Rabgap1l"; gene_biotype "protein_coding"; oId "ce:circRabgap1l-559-001|ts:circRabgap1l-2453-001"; tissue "ce|ts";
1	ncSplice	exon	160702358	160702460	.	-	.	gene_id "ENSMUSG00000026721"; transcript_id "mmCircRNA-157"; exon_number "2" gene_name "Rabgap1l"; gene_biotype "protein_coding"; oId "ce:circRabgap1l-559-001|ts:circRabgap1l-2453-001"; tissue "ce|ts";
1	ncSplice	gene	160700712	160724189	.	-	.	gene_id "ENSMUSG00000026721"; gene_name "Rabgap1l"; gene_source "ncSplice"; gene_biotype "protein_coding";
1	ncSplice	transcript	160700712	160724189	.	-	.	gene_id "ENSMUSG00000026721"; transcript_id "mmCircRNA-158"; gene_name "Rabgap1l"; gene_biotype "protein_coding"; transcript_biotype "circRNA"; oId "ce:circRabgap1l-561-001"; tissue "ce";
1	ncSplice	exon	160700712	160700878	.	-	.	gene_id "ENSMUSG00000026721"; transcript_id "mmCircRNA-158"; exon_number "1" gene_name "Rabgap1l"; gene_biotype "protein_coding"; oId "ce:circRabgap1l-561-001"; tissue "ce";
1	ncSplice	exon	160702358	160702460	.	-	.	gene_id "ENSMUSG00000026721"; transcript_id "mmCircRNA-158"; exon_number "2" gene_name "Rabgap1l"; gene_biotype "protein_coding"; oId "ce:circRabgap1l-561-001"; tissue "ce";
1	ncSplice	exon	160710147	160710213	.	-	.	gene_id "ENSMUSG00000026721"; transcript_id "mmCircRNA-158"; exon_number "3" gene_name "Rabgap1l"; gene_biotype "protein_coding"; oId "ce:circRabgap1l-561-001"; tissue "ce";
1	ncSplice	exon	160722133	160722243	.	-	.	gene_id "ENSMUSG00000026721"; transcript_id "mmCircRNA-158"; exon_number "4" gene_name "Rabgap1l"; gene_biotype "protein_coding"; oId "ce:circRabgap1l-561-001"; tissue "ce";
1	ncSplice	exon	160724032	160724189	.	-	.	gene_id "ENSMUSG00000026721"; transcript_id "mmCircRNA-158"; exon_number "5" gene_name "Rabgap1l"; gene_biotype "protein_coding"; oId "ce:circRabgap1l-561-001"; tissue "ce";
1	ncSplice	gene	160722133	160740931	.	-	.	gene_id "ENSMUSG00000026721"; gene_name "Rabgap1l"; gene_source "ncSplice"; gene_biotype "protein_coding";
1	ncSplice	transcript	160722133	160740931	.	-	.	gene_id "ENSMUSG00000026721"; transcript_id "mmCircRNA-159"; gene_name "Rabgap1l"; gene_biotype "protein_coding"; transcript_biotype "circRNA"; oId "ce:circRabgap1l-566-001"; tissue "ce";
1	ncSplice	exon	160722133	160722243	.	-	.	gene_id "ENSMUSG00000026721"; transcript_id "mmCircRNA-159"; exon_number "1" gene_name "Rabgap1l"; gene_biotype "protein_coding"; oId "ce:circRabgap1l-566-001"; tissue "ce";
1	ncSplice	exon	160724032	160724189	.	-	.	gene_id "ENSMUSG00000026721"; transcript_id "mmCircRNA-159"; exon_number "2" gene_name "Rabgap1l"; gene_biotype "protein_coding"; oId "ce:circRabgap1l-566-001"; tissue "ce";
1	ncSplice	exon	160733529	160733703	.	-	.	gene_id "ENSMUSG00000026721"; transcript_id "mmCircRNA-159"; exon_number "3" gene_name "Rabgap1l"; gene_biotype "protein_coding"; oId "ce:circRabgap1l-566-001"; tissue "ce";
1	ncSplice	exon	160735548	160735758	.	-	.	gene_id "ENSMUSG00000026721"; transcript_id "mmCircRNA-159"; exon_number "4" gene_name "Rabgap1l"; gene_biotype "protein_coding"; oId "ce:circRabgap1l-566-001"; tissue "ce";
1	ncSplice	exon	160738896	160739088	.	-	.	gene_id "ENSMUSG00000026721"; transcript_id "mmCircRNA-159"; exon_number "5" gene_name "Rabgap1l"; gene_biotype "protein_coding"; oId "ce:circRabgap1l-566-001"; tissue "ce";
1	ncSplice	exon	160740752	160740931	.	-	.	gene_id "ENSMUSG00000026721"; transcript_id "mmCircRNA-159"; exon_number "6" gene_name "Rabgap1l"; gene_biotype "protein_coding"; oId "ce:circRabgap1l-566-001"; tissue "ce";
11	ncSplice	gene	62146306	62161910	.	+	.	gene_id "ENSMUSG00000042331"; gene_name "Specc1"; gene_source "ncSplice"; gene_biotype "protein_coding";
11	ncSplice	transcript	62146306	62161910	.	+	.	gene_id "ENSMUSG00000042331"; transcript_id "mmCircRNA-160"; gene_name "Specc1"; gene_biotype "protein_coding"; transcript_biotype "circRNA"; oId "ce:circSpecc1-582-001"; tissue "ce";
11	ncSplice	exon	62146306	62146451	.	+	.	gene_id "ENSMUSG00000042331"; transcript_id "mmCircRNA-160"; exon_number "1" gene_name "Specc1"; gene_biotype "protein_coding"; oId "ce:circSpecc1-582-001"; tissue "ce";
11	ncSplice	exon	62147568	62147668	.	+	.	gene_id "ENSMUSG00000042331"; transcript_id "mmCircRNA-160"; exon_number "2" gene_name "Specc1"; gene_biotype "protein_coding"; oId "ce:circSpecc1-582-001"; tissue "ce";
11	ncSplice	exon	62151870	62151951	.	+	.	gene_id "ENSMUSG00000042331"; transcript_id "mmCircRNA-160"; exon_number "3" gene_name "Specc1"; gene_biotype "protein_coding"; oId "ce:circSpecc1-582-001"; tissue "ce";
11	ncSplice	exon	62156487	62156640	.	+	.	gene_id "ENSMUSG00000042331"; transcript_id "mmCircRNA-160"; exon_number "4" gene_name "Specc1"; gene_biotype "protein_coding"; oId "ce:circSpecc1-582-001"; tissue "ce";
11	ncSplice	exon	62161808	62161910	.	+	.	gene_id "ENSMUSG00000042331"; transcript_id "mmCircRNA-160"; exon_number "5" gene_name "Specc1"; gene_biotype "protein_coding"; oId "ce:circSpecc1-582-001"; tissue "ce";
11	ncSplice	gene	62283597	62292218	.	+	.	gene_id "ENSMUSG00000042298"; gene_name "Ttc19"; gene_source "ncSplice"; gene_biotype "protein_coding";
11	ncSplice	transcript	62283597	62292218	.	+	.	gene_id "ENSMUSG00000042298"; transcript_id "mmCircRNA-161"; gene_name "Ttc19"; gene_biotype "protein_coding"; transcript_biotype "circRNA"; oId "ce:circTtc19-588-001"; tissue "ce";
11	ncSplice	exon	62283597	62283707	.	+	.	gene_id "ENSMUSG00000042298"; transcript_id "mmCircRNA-161"; exon_number "1" gene_name "Ttc19"; gene_biotype "protein_coding"; oId "ce:circTtc19-588-001"; tissue "ce";
11	ncSplice	exon	62284131	62284169	.	+	.	gene_id "ENSMUSG00000042298"; transcript_id "mmCircRNA-161"; exon_number "2" gene_name "Ttc19"; gene_biotype "protein_coding"; oId "ce:circTtc19-588-001"; tissue "ce";
11	ncSplice	exon	62285003	62285059	.	+	.	gene_id "ENSMUSG00000042298"; transcript_id "mmCircRNA-161"; exon_number "3" gene_name "Ttc19"; gene_biotype "protein_coding"; oId "ce:circTtc19-588-001"; tissue "ce";
11	ncSplice	exon	62285824	62285885	.	+	.	gene_id "ENSMUSG00000042298"; transcript_id "mmCircRNA-161"; exon_number "4" gene_name "Ttc19"; gene_biotype "protein_coding"; oId "ce:circTtc19-588-001"; tissue "ce";
11	ncSplice	exon	62292124	62292218	.	+	.	gene_id "ENSMUSG00000042298"; transcript_id "mmCircRNA-161"; exon_number "5" gene_name "Ttc19"; gene_biotype "protein_coding"; oId "ce:circTtc19-588-001"; tissue "ce";
1	ncSplice	gene	162285997	162313696	.	-	.	gene_id "ENSMUSG00000040265"; gene_name "Dnm3"; gene_source "ncSplice"; gene_biotype "protein_coding";
1	ncSplice	transcript	162285997	162313696	.	-	.	gene_id "ENSMUSG00000040265"; transcript_id "mmCircRNA-162"; gene_name "Dnm3"; gene_biotype "protein_coding"; transcript_biotype "circRNA"; oId "ce:circDnm3-589-001"; tissue "ce";
1	ncSplice	exon	162285997	162286067	.	-	.	gene_id "ENSMUSG00000040265"; transcript_id "mmCircRNA-162"; exon_number "1" gene_name "Dnm3"; gene_biotype "protein_coding"; oId "ce:circDnm3-589-001"; tissue "ce";
1	ncSplice	exon	162295552	162295638	.	-	.	gene_id "ENSMUSG00000040265"; transcript_id "mmCircRNA-162"; exon_number "2" gene_name "Dnm3"; gene_biotype "protein_coding"; oId "ce:circDnm3-589-001"; tissue "ce";
1	ncSplice	exon	162307868	162308006	.	-	.	gene_id "ENSMUSG00000040265"; transcript_id "mmCircRNA-162"; exon_number "3" gene_name "Dnm3"; gene_biotype "protein_coding"; oId "ce:circDnm3-589-001"; tissue "ce";
1	ncSplice	exon	162311392	162311459	.	-	.	gene_id "ENSMUSG00000040265"; transcript_id "mmCircRNA-162"; exon_number "4" gene_name "Dnm3"; gene_biotype "protein_coding"; oId "ce:circDnm3-589-001"; tissue "ce";
1	ncSplice	exon	162313561	162313696	.	-	.	gene_id "ENSMUSG00000040265"; transcript_id "mmCircRNA-162"; exon_number "5" gene_name "Dnm3"; gene_biotype "protein_coding"; oId "ce:circDnm3-589-001"; tissue "ce";
1	ncSplice	gene	162353520	162355509	.	-	.	gene_id "ENSMUSG00000040265"; gene_name "Dnm3"; gene_source "ncSplice"; gene_biotype "protein_coding";
1	ncSplice	transcript	162353520	162355509	.	-	.	gene_id "ENSMUSG00000040265"; transcript_id "mmCircRNA-163"; gene_name "Dnm3"; gene_biotype "protein_coding"; transcript_biotype "circRNA"; oId "ce:circDnm3-594-001"; tissue "ce";
1	ncSplice	exon	162353520	162353723	.	-	.	gene_id "ENSMUSG00000040265"; transcript_id "mmCircRNA-163"; exon_number "1" gene_name "Dnm3"; gene_biotype "protein_coding"; oId "ce:circDnm3-594-001"; tissue "ce";
1	ncSplice	exon	162355360	162355509	.	-	.	gene_id "ENSMUSG00000040265"; transcript_id "mmCircRNA-163"; exon_number "2" gene_name "Dnm3"; gene_biotype "protein_coding"; oId "ce:circDnm3-594-001"; tissue "ce";
11	ncSplice	gene	6313788	6317080	.	+	.	gene_id "ENSMUSG00000020456"; gene_name "Ogdh"; gene_source "ncSplice"; gene_biotype "protein_coding";
11	ncSplice	transcript	6313788	6317080	.	+	.	gene_id "ENSMUSG00000020456"; transcript_id "mmCircRNA-164"; gene_name "Ogdh"; gene_biotype "protein_coding"; transcript_biotype "circRNA"; oId "ce:circOgdh-599-001|ts:circOgdh-435-001"; tissue "ce|ts";
11	ncSplice	exon	6313788	6313979	.	+	.	gene_id "ENSMUSG00000020456"; transcript_id "mmCircRNA-164"; exon_number "1" gene_name "Ogdh"; gene_biotype "protein_coding"; oId "ce:circOgdh-599-001|ts:circOgdh-435-001"; tissue "ce|ts";
11	ncSplice	exon	6316978	6317080	.	+	.	gene_id "ENSMUSG00000020456"; transcript_id "mmCircRNA-164"; exon_number "2" gene_name "Ogdh"; gene_biotype "protein_coding"; oId "ce:circOgdh-599-001|ts:circOgdh-435-001"; tissue "ce|ts";
1	ncSplice	gene	163883383	163888305	.	+	.	gene_id "ENSMUSG00000026585"; gene_name "Kifap3"; gene_source "ncSplice"; gene_biotype "protein_coding";
1	ncSplice	transcript	163883383	163888305	.	+	.	gene_id "ENSMUSG00000026585"; transcript_id "mmCircRNA-165"; gene_name "Kifap3"; gene_biotype "protein_coding"; transcript_biotype "circRNA"; oId "ce:circKifap3-604-001"; tissue "ce";
1	ncSplice	exon	163883383	163883572	.	+	.	gene_id "ENSMUSG00000026585"; transcript_id "mmCircRNA-165"; exon_number "1" gene_name "Kifap3"; gene_biotype "protein_coding"; oId "ce:circKifap3-604-001"; tissue "ce";
1	ncSplice	exon	163888206	163888305	.	+	.	gene_id "ENSMUSG00000026585"; transcript_id "mmCircRNA-165"; exon_number "2" gene_name "Kifap3"; gene_biotype "protein_coding"; oId "ce:circKifap3-604-001"; tissue "ce";
1	ncSplice	gene	165604610	165608604	.	-	.	gene_id "ENSMUSG00000026566"; gene_name "Mpzl1"; gene_source "ncSplice"; gene_biotype "protein_coding";
1	ncSplice	transcript	165604610	165608604	.	-	.	gene_id "ENSMUSG00000026566"; transcript_id "mmCircRNA-166"; gene_name "Mpzl1"; gene_biotype "protein_coding"; transcript_biotype "circRNA"; oId "ce:circMpzl1-624-001"; tissue "ce";
1	ncSplice	exon	165604610	165604742	.	-	.	gene_id "ENSMUSG00000026566"; transcript_id "mmCircRNA-166"; exon_number "1" gene_name "Mpzl1"; gene_biotype "protein_coding"; oId "ce:circMpzl1-624-001"; tissue "ce";
1	ncSplice	exon	165605609	165605822	.	-	.	gene_id "ENSMUSG00000026566"; transcript_id "mmCircRNA-166"; exon_number "2" gene_name "Mpzl1"; gene_biotype "protein_coding"; oId "ce:circMpzl1-624-001"; tissue "ce";
1	ncSplice	exon	165608438	165608604	.	-	.	gene_id "ENSMUSG00000026566"; transcript_id "mmCircRNA-166"; exon_number "3" gene_name "Mpzl1"; gene_biotype "protein_coding"; oId "ce:circMpzl1-624-001"; tissue "ce";
1	ncSplice	gene	16581927	16602353	.	-	.	gene_id "ENSMUSG00000025939"; gene_name "Ube2w"; gene_source "ncSplice"; gene_biotype "protein_coding";
1	ncSplice	transcript	16581927	16602353	.	-	.	gene_id "ENSMUSG00000025939"; transcript_id "mmCircRNA-167"; gene_name "Ube2w"; gene_biotype "protein_coding"; transcript_biotype "circRNA"; oId "ce:circUbe2w-629-002"; tissue "ce";
1	ncSplice	exon	16581927	16582002	.	-	.	gene_id "ENSMUSG00000025939"; transcript_id "mmCircRNA-167"; exon_number "1" gene_name "Ube2w"; gene_biotype "protein_coding"; oId "ce:circUbe2w-629-002"; tissue "ce";
1	ncSplice	exon	16585276	16585431	.	-	.	gene_id "ENSMUSG00000025939"; transcript_id "mmCircRNA-167"; exon_number "2" gene_name "Ube2w"; gene_biotype "protein_coding"; oId "ce:circUbe2w-629-002"; tissue "ce";
1	ncSplice	exon	16597951	16598053	.	-	.	gene_id "ENSMUSG00000025939"; transcript_id "mmCircRNA-167"; exon_number "3" gene_name "Ube2w"; gene_biotype "protein_coding"; oId "ce:circUbe2w-629-002"; tissue "ce";
1	ncSplice	exon	16602262	16602353	.	-	.	gene_id "ENSMUSG00000025939"; transcript_id "mmCircRNA-167"; exon_number "4" gene_name "Ube2w"; gene_biotype "protein_coding"; oId "ce:circUbe2w-629-002"; tissue "ce";
11	ncSplice	gene	7078888	7109112	.	+	.	gene_id "ENSMUSG00000020431"; gene_name "Adcy1"; gene_source "ncSplice"; gene_biotype "protein_coding";
11	ncSplice	transcript	7078888	7109112	.	+	.	gene_id "ENSMUSG00000020431"; transcript_id "mmCircRNA-168"; gene_name "Adcy1"; gene_biotype "protein_coding"; transcript_biotype "circRNA"; oId "ce:circAdcy1-655-001"; tissue "ce";
11	ncSplice	exon	7078888	7079037	.	+	.	gene_id "ENSMUSG00000020431"; transcript_id "mmCircRNA-168"; exon_number "1" gene_name "Adcy1"; gene_biotype "protein_coding"; oId "ce:circAdcy1-655-001"; tissue "ce";
11	ncSplice	exon	7100570	7100688	.	+	.	gene_id "ENSMUSG00000020431"; transcript_id "mmCircRNA-168"; exon_number "2" gene_name "Adcy1"; gene_biotype "protein_coding"; oId "ce:circAdcy1-655-001"; tissue "ce";
11	ncSplice	exon	7109001	7109112	.	+	.	gene_id "ENSMUSG00000020431"; transcript_id "mmCircRNA-168"; exon_number "3" gene_name "Adcy1"; gene_biotype "protein_coding"; oId "ce:circAdcy1-655-001"; tissue "ce";
11	ncSplice	gene	70917315	70925912	.	+	.	gene_id "ENSMUSG00000020817"; gene_name "Rabep1"; gene_source "ncSplice"; gene_biotype "protein_coding";
11	ncSplice	transcript	70917315	70925912	.	+	.	gene_id "ENSMUSG00000020817"; transcript_id "mmCircRNA-169"; gene_name "Rabep1"; gene_biotype "protein_coding"; transcript_biotype "circRNA"; oId "ce:circRabep1-666-001"; tissue "ce";
11	ncSplice	exon	70917315	70917782	.	+	.	gene_id "ENSMUSG00000020817"; transcript_id "mmCircRNA-169"; exon_number "1" gene_name "Rabep1"; gene_biotype "protein_coding"; oId "ce:circRabep1-666-001"; tissue "ce";
11	ncSplice	exon	70919177	70919281	.	+	.	gene_id "ENSMUSG00000020817"; transcript_id "mmCircRNA-169"; exon_number "2" gene_name "Rabep1"; gene_biotype "protein_coding"; oId "ce:circRabep1-666-001"; tissue "ce";
11	ncSplice	exon	70920852	70920968	.	+	.	gene_id "ENSMUSG00000020817"; transcript_id "mmCircRNA-169"; exon_number "3" gene_name "Rabep1"; gene_biotype "protein_coding"; oId "ce:circRabep1-666-001"; tissue "ce";
11	ncSplice	exon	70923143	70923241	.	+	.	gene_id "ENSMUSG00000020817"; transcript_id "mmCircRNA-169"; exon_number "4" gene_name "Rabep1"; gene_biotype "protein_coding"; oId "ce:circRabep1-666-001"; tissue "ce";
11	ncSplice	exon	70925772	70925912	.	+	.	gene_id "ENSMUSG00000020817"; transcript_id "mmCircRNA-169"; exon_number "5" gene_name "Rabep1"; gene_biotype "protein_coding"; oId "ce:circRabep1-666-001"; tissue "ce";
11	ncSplice	gene	72645537	72663173	.	+	.	gene_id "ENSMUSG00000020794"; gene_name "Ube2g1"; gene_source "ncSplice"; gene_biotype "protein_coding";
11	ncSplice	transcript	72645537	72663173	.	+	.	gene_id "ENSMUSG00000020794"; transcript_id "mmCircRNA-170"; gene_name "Ube2g1"; gene_biotype "protein_coding"; transcript_biotype "circRNA"; oId "ce:circUbe2g1-677-001"; tissue "ce";
11	ncSplice	exon	72645537	72645652	.	+	.	gene_id "ENSMUSG00000020794"; transcript_id "mmCircRNA-170"; exon_number "1" gene_name "Ube2g1"; gene_biotype "protein_coding"; oId "ce:circUbe2g1-677-001"; tissue "ce";
11	ncSplice	exon	72663071	72663173	.	+	.	gene_id "ENSMUSG00000020794"; transcript_id "mmCircRNA-170"; exon_number "2" gene_name "Ube2g1"; gene_biotype "protein_coding"; oId "ce:circUbe2g1-677-001"; tissue "ce";
11	ncSplice	gene	74656423	74657339	.	+	.	gene_id "ENSMUSG00000020741"; gene_name "Cluh"; gene_source "ncSplice"; gene_biotype "protein_coding";
11	ncSplice	transcript	74656423	74657339	.	+	.	gene_id "ENSMUSG00000020741"; transcript_id "mmCircRNA-171"; gene_name "Cluh"; gene_biotype "protein_coding"; transcript_biotype "circRNA"; oId "ce:circCluh-691-001"; tissue "ce";
11	ncSplice	exon	74656423	74656625	.	+	.	gene_id "ENSMUSG00000020741"; transcript_id "mmCircRNA-171"; exon_number "1" gene_name "Cluh"; gene_biotype "protein_coding"; oId "ce:circCluh-691-001"; tissue "ce";
11	ncSplice	exon	74657168	74657339	.	+	.	gene_id "ENSMUSG00000020741"; transcript_id "mmCircRNA-171"; exon_number "2" gene_name "Cluh"; gene_biotype "protein_coding"; oId "ce:circCluh-691-001"; tissue "ce";
11	ncSplice	gene	74945522	74990215	.	+	.	gene_id "ENSMUSG00000038290"; gene_name "Smg6"; gene_source "ncSplice"; gene_biotype "protein_coding";
11	ncSplice	transcript	74945522	74990215	.	+	.	gene_id "ENSMUSG00000038290"; transcript_id "mmCircRNA-172"; gene_name "Smg6"; gene_biotype "protein_coding"; transcript_biotype "circRNA"; oId "ce:circSmg6-693-001"; tissue "ce";
11	ncSplice	exon	74945522	74945632	.	+	.	gene_id "ENSMUSG00000038290"; transcript_id "mmCircRNA-172"; exon_number "1" gene_name "Smg6"; gene_biotype "protein_coding"; oId "ce:circSmg6-693-001"; tissue "ce";
11	ncSplice	exon	74946007	74946219	.	+	.	gene_id "ENSMUSG00000038290"; transcript_id "mmCircRNA-172"; exon_number "2" gene_name "Smg6"; gene_biotype "protein_coding"; oId "ce:circSmg6-693-001"; tissue "ce";
11	ncSplice	exon	74981852	74981913	.	+	.	gene_id "ENSMUSG00000038290"; transcript_id "mmCircRNA-172"; exon_number "3" gene_name "Smg6"; gene_biotype "protein_coding"; oId "ce:circSmg6-693-001"; tissue "ce";
11	ncSplice	exon	74990070	74990215	.	+	.	gene_id "ENSMUSG00000038290"; transcript_id "mmCircRNA-172"; exon_number "4" gene_name "Smg6"; gene_biotype "protein_coding"; oId "ce:circSmg6-693-001"; tissue "ce";
1	ncSplice	gene	175121728	175153230	.	-	.	gene_id "ENSMUSG00000026527"; gene_name "Rgs7"; gene_source "ncSplice"; gene_biotype "protein_coding";
1	ncSplice	transcript	175121728	175153230	.	-	.	gene_id "ENSMUSG00000026527"; transcript_id "mmCircRNA-173"; gene_name "Rgs7"; gene_biotype "protein_coding"; transcript_biotype "circRNA"; oId "ce:circRgs7-699-001"; tissue "ce";
1	ncSplice	exon	175121728	175121809	.	-	.	gene_id "ENSMUSG00000026527"; transcript_id "mmCircRNA-173"; exon_number "1" gene_name "Rgs7"; gene_biotype "protein_coding"; oId "ce:circRgs7-699-001"; tissue "ce";
1	ncSplice	exon	175121895	175121971	.	-	.	gene_id "ENSMUSG00000026527"; transcript_id "mmCircRNA-173"; exon_number "2" gene_name "Rgs7"; gene_biotype "protein_coding"; oId "ce:circRgs7-699-001"; tissue "ce";
1	ncSplice	exon	175122931	175122995	.	-	.	gene_id "ENSMUSG00000026527"; transcript_id "mmCircRNA-173"; exon_number "3" gene_name "Rgs7"; gene_biotype "protein_coding"; oId "ce:circRgs7-699-001"; tissue "ce";
1	ncSplice	exon	175149652	175149703	.	-	.	gene_id "ENSMUSG00000026527"; transcript_id "mmCircRNA-173"; exon_number "4" gene_name "Rgs7"; gene_biotype "protein_coding"; oId "ce:circRgs7-699-001"; tissue "ce";
1	ncSplice	exon	175153124	175153230	.	-	.	gene_id "ENSMUSG00000026527"; transcript_id "mmCircRNA-173"; exon_number "5" gene_name "Rgs7"; gene_biotype "protein_coding"; oId "ce:circRgs7-699-001"; tissue "ce";
11	ncSplice	gene	75390072	75391227	.	+	.	gene_id "ENSMUSG00000018809"; gene_name "Smyd4"; gene_source "ncSplice"; gene_biotype "protein_coding";
11	ncSplice	transcript	75390072	75391227	.	+	.	gene_id "ENSMUSG00000018809"; transcript_id "mmCircRNA-174"; gene_name "Smyd4"; gene_biotype "protein_coding"; transcript_biotype "circRNA"; oId "ce:circSmyd4-700-001|ts:circSmyd4-464-001"; tissue "ce|ts";
11	ncSplice	exon	75390072	75390140	.	+	.	gene_id "ENSMUSG00000018809"; transcript_id "mmCircRNA-174"; exon_number "1" gene_name "Smyd4"; gene_biotype "protein_coding"; oId "ce:circSmyd4-700-001|ts:circSmyd4-464-001"; tissue "ce|ts";
11	ncSplice	exon	75390258	75391227	.	+	.	gene_id "ENSMUSG00000018809"; transcript_id "mmCircRNA-174"; exon_number "2" gene_name "Smyd4"; gene_biotype "protein_coding"; oId "ce:circSmyd4-700-001|ts:circSmyd4-464-001"; tissue "ce|ts";
1	ncSplice	gene	177096967	177131096	.	-	.	gene_id "ENSMUSG00000019699"; gene_name "Akt3"; gene_source "ncSplice"; gene_biotype "protein_coding";
1	ncSplice	transcript	177096967	177131096	.	-	.	gene_id "ENSMUSG00000019699"; transcript_id "mmCircRNA-175"; gene_name "Akt3"; gene_biotype "protein_coding"; transcript_biotype "circRNA"; oId "ce:circAkt3-724-001|ts:circAkt3-2521-004"; tissue "ce|ts";
1	ncSplice	exon	177096967	177097098	.	-	.	gene_id "ENSMUSG00000019699"; transcript_id "mmCircRNA-175"; exon_number "1" gene_name "Akt3"; gene_biotype "protein_coding"; oId "ce:circAkt3-724-001|ts:circAkt3-2521-004"; tissue "ce|ts";
1	ncSplice	exon	177102962	177103106	.	-	.	gene_id "ENSMUSG00000019699"; transcript_id "mmCircRNA-175"; exon_number "2" gene_name "Akt3"; gene_biotype "protein_coding"; oId "ce:circAkt3-724-001|ts:circAkt3-2521-004"; tissue "ce|ts";
1	ncSplice	exon	177109627	177109738	.	-	.	gene_id "ENSMUSG00000019699"; transcript_id "mmCircRNA-175"; exon_number "3" gene_name "Akt3"; gene_biotype "protein_coding"; oId "ce:circAkt3-724-001|ts:circAkt3-2521-004"; tissue "ce|ts";
1	ncSplice	exon	177130971	177131096	.	-	.	gene_id "ENSMUSG00000019699"; transcript_id "mmCircRNA-175"; exon_number "4" gene_name "Akt3"; gene_biotype "protein_coding"; oId "ce:circAkt3-724-001|ts:circAkt3-2521-004"; tissue "ce|ts";
1	ncSplice	gene	177102962	177131096	.	-	.	gene_id "ENSMUSG00000019699"; gene_name "Akt3"; gene_source "ncSplice"; gene_biotype "protein_coding";
1	ncSplice	transcript	177102962	177131096	.	-	.	gene_id "ENSMUSG00000019699"; transcript_id "mmCircRNA-176"; gene_name "Akt3"; gene_biotype "protein_coding"; transcript_biotype "circRNA"; oId "ce:circAkt3-725-001|ts:circAkt3-2522-004"; tissue "ce|ts";
1	ncSplice	exon	177102962	177103106	.	-	.	gene_id "ENSMUSG00000019699"; transcript_id "mmCircRNA-176"; exon_number "1" gene_name "Akt3"; gene_biotype "protein_coding"; oId "ce:circAkt3-725-001|ts:circAkt3-2522-004"; tissue "ce|ts";
1	ncSplice	exon	177109627	177109738	.	-	.	gene_id "ENSMUSG00000019699"; transcript_id "mmCircRNA-176"; exon_number "2" gene_name "Akt3"; gene_biotype "protein_coding"; oId "ce:circAkt3-725-001|ts:circAkt3-2522-004"; tissue "ce|ts";
1	ncSplice	exon	177130971	177131096	.	-	.	gene_id "ENSMUSG00000019699"; transcript_id "mmCircRNA-176"; exon_number "3" gene_name "Akt3"; gene_biotype "protein_coding"; oId "ce:circAkt3-725-001|ts:circAkt3-2522-004"; tissue "ce|ts";
11	ncSplice	gene	77571607	77585494	.	-	.	gene_id "ENSMUSG00000017291"; gene_name "Taok1"; gene_source "ncSplice"; gene_biotype "protein_coding";
11	ncSplice	transcript	77571607	77585494	.	-	.	gene_id "ENSMUSG00000017291"; transcript_id "mmCircRNA-177"; gene_name "Taok1"; gene_biotype "protein_coding"; transcript_biotype "circRNA"; oId "ce:circTaok1-731-001"; tissue "ce";
11	ncSplice	exon	77571607	77571698	.	-	.	gene_id "ENSMUSG00000017291"; transcript_id "mmCircRNA-177"; exon_number "1" gene_name "Taok1"; gene_biotype "protein_coding"; oId "ce:circTaok1-731-001"; tissue "ce";
11	ncSplice	exon	77573696	77573809	.	-	.	gene_id "ENSMUSG00000017291"; transcript_id "mmCircRNA-177"; exon_number "2" gene_name "Taok1"; gene_biotype "protein_coding"; oId "ce:circTaok1-731-001"; tissue "ce";
11	ncSplice	exon	77575573	77575669	.	-	.	gene_id "ENSMUSG00000017291"; transcript_id "mmCircRNA-177"; exon_number "3" gene_name "Taok1"; gene_biotype "protein_coding"; oId "ce:circTaok1-731-001"; tissue "ce";
11	ncSplice	exon	77577323	77577368	.	-	.	gene_id "ENSMUSG00000017291"; transcript_id "mmCircRNA-177"; exon_number "4" gene_name "Taok1"; gene_biotype "protein_coding"; oId "ce:circTaok1-731-001"; tissue "ce";
11	ncSplice	exon	77578726	77578827	.	-	.	gene_id "ENSMUSG00000017291"; transcript_id "mmCircRNA-177"; exon_number "5" gene_name "Taok1"; gene_biotype "protein_coding"; oId "ce:circTaok1-731-001"; tissue "ce";
11	ncSplice	exon	77579774	77579845	.	-	.	gene_id "ENSMUSG00000017291"; transcript_id "mmCircRNA-177"; exon_number "6" gene_name "Taok1"; gene_biotype "protein_coding"; oId "ce:circTaok1-731-001"; tissue "ce";
11	ncSplice	exon	77585273	77585494	.	-	.	gene_id "ENSMUSG00000017291"; transcript_id "mmCircRNA-177"; exon_number "7" gene_name "Taok1"; gene_biotype "protein_coding"; oId "ce:circTaok1-731-001"; tissue "ce";
1	ncSplice	gene	178323134	178325313	.	-	.	gene_id "ENSMUSG00000039630"; gene_name "Hnrnpu"; gene_source "ncSplice"; gene_biotype "protein_coding";
1	ncSplice	transcript	178323134	178325313	.	-	.	gene_id "ENSMUSG00000039630"; transcript_id "mmCircRNA-178"; gene_name "Hnrnpu"; gene_biotype "protein_coding"; transcript_biotype "circRNA"; oId "ce:circHnrnpu-736-001"; tissue "ce";
1	ncSplice	exon	178323134	178323195	.	-	.	gene_id "ENSMUSG00000039630"; transcript_id "mmCircRNA-178"; exon_number "1" gene_name "Hnrnpu"; gene_biotype "protein_coding"; oId "ce:circHnrnpu-736-001"; tissue "ce";
1	ncSplice	exon	178323620	178323713	.	-	.	gene_id "ENSMUSG00000039630"; transcript_id "mmCircRNA-178"; exon_number "2" gene_name "Hnrnpu"; gene_biotype "protein_coding"; oId "ce:circHnrnpu-736-001"; tissue "ce";
1	ncSplice	exon	178323966	178324016	.	-	.	gene_id "ENSMUSG00000039630"; transcript_id "mmCircRNA-178"; exon_number "3" gene_name "Hnrnpu"; gene_biotype "protein_coding"; oId "ce:circHnrnpu-736-001"; tissue "ce";
1	ncSplice	exon	178325243	178325313	.	-	.	gene_id "ENSMUSG00000039630"; transcript_id "mmCircRNA-178"; exon_number "4" gene_name "Hnrnpu"; gene_biotype "protein_coding"; oId "ce:circHnrnpu-736-001"; tissue "ce";
1	ncSplice	gene	179999362	180040200	.	+	.	gene_id "ENSMUSG00000026490"; gene_name "Cdc42bpa"; gene_source "ncSplice"; gene_biotype "protein_coding";
1	ncSplice	transcript	179999362	180040200	.	+	.	gene_id "ENSMUSG00000026490"; transcript_id "mmCircRNA-179"; gene_name "Cdc42bpa"; gene_biotype "protein_coding"; transcript_biotype "circRNA"; oId "ce:circCdc42bpa-767-001"; tissue "ce";
1	ncSplice	exon	179999362	179999453	.	+	.	gene_id "ENSMUSG00000026490"; transcript_id "mmCircRNA-179"; exon_number "1" gene_name "Cdc42bpa"; gene_biotype "protein_coding"; oId "ce:circCdc42bpa-767-001"; tissue "ce";
1	ncSplice	exon	180024645	180024802	.	+	.	gene_id "ENSMUSG00000026490"; transcript_id "mmCircRNA-179"; exon_number "2" gene_name "Cdc42bpa"; gene_biotype "protein_coding"; oId "ce:circCdc42bpa-767-001"; tissue "ce";
1	ncSplice	exon	180031505	180031588	.	+	.	gene_id "ENSMUSG00000026490"; transcript_id "mmCircRNA-179"; exon_number "3" gene_name "Cdc42bpa"; gene_biotype "protein_coding"; oId "ce:circCdc42bpa-767-001"; tissue "ce";
1	ncSplice	exon	180036829	180036924	.	+	.	gene_id "ENSMUSG00000026490"; transcript_id "mmCircRNA-179"; exon_number "4" gene_name "Cdc42bpa"; gene_biotype "protein_coding"; oId "ce:circCdc42bpa-767-001"; tissue "ce";
1	ncSplice	exon	180040052	180040200	.	+	.	gene_id "ENSMUSG00000026490"; transcript_id "mmCircRNA-179"; exon_number "5" gene_name "Cdc42bpa"; gene_biotype "protein_coding"; oId "ce:circCdc42bpa-767-001"; tissue "ce";
1	ncSplice	gene	181956394	181961919	.	-	.	gene_id "ENSMUSG00000022995"; gene_name "Enah"; gene_source "ncSplice"; gene_biotype "protein_coding";
1	ncSplice	transcript	181956394	181961919	.	-	.	gene_id "ENSMUSG00000022995"; transcript_id "mmCircRNA-180"; gene_name "Enah"; gene_biotype "protein_coding"; transcript_biotype "circRNA"; oId "ce:circEnah-784-001"; tissue "ce";
1	ncSplice	exon	181956394	181956571	.	-	.	gene_id "ENSMUSG00000022995"; transcript_id "mmCircRNA-180"; exon_number "1" gene_name "Enah"; gene_biotype "protein_coding"; oId "ce:circEnah-784-001"; tissue "ce";
1	ncSplice	exon	181961754	181961919	.	-	.	gene_id "ENSMUSG00000022995"; transcript_id "mmCircRNA-180"; exon_number "2" gene_name "Enah"; gene_biotype "protein_coding"; oId "ce:circEnah-784-001"; tissue "ce";
1	ncSplice	gene	185266901	185267279	.	+	.	gene_id "ENSMUSG00000039318"; gene_name "Rab3gap2"; gene_source "ncSplice"; gene_biotype "protein_coding";
1	ncSplice	transcript	185266901	185267279	.	+	.	gene_id "ENSMUSG00000039318"; transcript_id "mmCircRNA-181"; gene_name "Rab3gap2"; gene_biotype "protein_coding"; transcript_biotype "circRNA"; oId "ce:circRab3gap2-799-001"; tissue "ce";
1	ncSplice	exon	185266901	185267074	.	+	.	gene_id "ENSMUSG00000039318"; transcript_id "mmCircRNA-181"; exon_number "1" gene_name "Rab3gap2"; gene_biotype "protein_coding"; oId "ce:circRab3gap2-799-001"; tissue "ce";
1	ncSplice	exon	185267173	185267279	.	+	.	gene_id "ENSMUSG00000039318"; transcript_id "mmCircRNA-181"; exon_number "2" gene_name "Rab3gap2"; gene_biotype "protein_coding"; oId "ce:circRab3gap2-799-001"; tissue "ce";
11	ncSplice	gene	85326864	85339796	.	+	.	gene_id "ENSMUSG00000020525"; gene_name "Ppm1d"; gene_source "ncSplice"; gene_biotype "protein_coding";
11	ncSplice	transcript	85326864	85339796	.	+	.	gene_id "ENSMUSG00000020525"; transcript_id "mmCircRNA-182"; gene_name "Ppm1d"; gene_biotype "protein_coding"; transcript_biotype "circRNA"; oId "ce:circPpm1d-801-001"; tissue "ce";
11	ncSplice	exon	85326864	85327092	.	+	.	gene_id "ENSMUSG00000020525"; transcript_id "mmCircRNA-182"; exon_number "1" gene_name "Ppm1d"; gene_biotype "protein_coding"; oId "ce:circPpm1d-801-001"; tissue "ce";
11	ncSplice	exon	85332251	85332375	.	+	.	gene_id "ENSMUSG00000020525"; transcript_id "mmCircRNA-182"; exon_number "2" gene_name "Ppm1d"; gene_biotype "protein_coding"; oId "ce:circPpm1d-801-001"; tissue "ce";
11	ncSplice	exon	85337065	85337255	.	+	.	gene_id "ENSMUSG00000020525"; transcript_id "mmCircRNA-182"; exon_number "3" gene_name "Ppm1d"; gene_biotype "protein_coding"; oId "ce:circPpm1d-801-001"; tissue "ce";
11	ncSplice	exon	85339554	85339796	.	+	.	gene_id "ENSMUSG00000020525"; transcript_id "mmCircRNA-182"; exon_number "4" gene_name "Ppm1d"; gene_biotype "protein_coding"; oId "ce:circPpm1d-801-001"; tissue "ce";
11	ncSplice	gene	87146934	87149363	.	+	.	gene_id "ENSMUSG00000018548"; gene_name "Trim37"; gene_source "ncSplice"; gene_biotype "protein_coding";
11	ncSplice	transcript	87146934	87149363	.	+	.	gene_id "ENSMUSG00000018548"; transcript_id "mmCircRNA-183"; gene_name "Trim37"; gene_biotype "protein_coding"; transcript_biotype "circRNA"; oId "ce:circTrim37-822-001"; tissue "ce";
11	ncSplice	exon	87146934	87147057	.	+	.	gene_id "ENSMUSG00000018548"; transcript_id "mmCircRNA-183"; exon_number "1" gene_name "Trim37"; gene_biotype "protein_coding"; oId "ce:circTrim37-822-001"; tissue "ce";
11	ncSplice	exon	87149296	87149363	.	+	.	gene_id "ENSMUSG00000018548"; transcript_id "mmCircRNA-183"; exon_number "2" gene_name "Trim37"; gene_biotype "protein_coding"; oId "ce:circTrim37-822-001"; tissue "ce";
11	ncSplice	gene	87598863	87601172	.	+	.	gene_id "ENSMUSG00000018401"; gene_name "Mtmr4"; gene_source "ncSplice"; gene_biotype "protein_coding";
11	ncSplice	transcript	87598863	87601172	.	+	.	gene_id "ENSMUSG00000018401"; transcript_id "mmCircRNA-184"; gene_name "Mtmr4"; gene_biotype "protein_coding"; transcript_biotype "circRNA"; oId "ce:circMtmr4-825-001"; tissue "ce";
11	ncSplice	exon	87598863	87598945	.	+	.	gene_id "ENSMUSG00000018401"; transcript_id "mmCircRNA-184"; exon_number "1" gene_name "Mtmr4"; gene_biotype "protein_coding"; oId "ce:circMtmr4-825-001"; tissue "ce";
11	ncSplice	exon	87600504	87600664	.	+	.	gene_id "ENSMUSG00000018401"; transcript_id "mmCircRNA-184"; exon_number "2" gene_name "Mtmr4"; gene_biotype "protein_coding"; oId "ce:circMtmr4-825-001"; tissue "ce";
11	ncSplice	exon	87600774	87600870	.	+	.	gene_id "ENSMUSG00000018401"; transcript_id "mmCircRNA-184"; exon_number "3" gene_name "Mtmr4"; gene_biotype "protein_coding"; oId "ce:circMtmr4-825-001"; tissue "ce";
11	ncSplice	exon	87601059	87601172	.	+	.	gene_id "ENSMUSG00000018401"; transcript_id "mmCircRNA-184"; exon_number "4" gene_name "Mtmr4"; gene_biotype "protein_coding"; oId "ce:circMtmr4-825-001"; tissue "ce";
11	ncSplice	gene	88073057	88078555	.	+	.	gene_id "ENSMUSG00000018377"; gene_name "Vezf1"; gene_source "ncSplice"; gene_biotype "protein_coding";
11	ncSplice	transcript	88073057	88078555	.	+	.	gene_id "ENSMUSG00000018377"; transcript_id "mmCircRNA-185"; gene_name "Vezf1"; gene_biotype "protein_coding"; transcript_biotype "circRNA"; oId "ce:circVezf1-827-001"; tissue "ce";
11	ncSplice	exon	88073057	88073751	.	+	.	gene_id "ENSMUSG00000018377"; transcript_id "mmCircRNA-185"; exon_number "1" gene_name "Vezf1"; gene_biotype "protein_coding"; oId "ce:circVezf1-827-001"; tissue "ce";
11	ncSplice	exon	88074662	88074725	.	+	.	gene_id "ENSMUSG00000018377"; transcript_id "mmCircRNA-185"; exon_number "2" gene_name "Vezf1"; gene_biotype "protein_coding"; oId "ce:circVezf1-827-001"; tissue "ce";
11	ncSplice	exon	88076173	88078555	.	+	.	gene_id "ENSMUSG00000018377"; transcript_id "mmCircRNA-185"; exon_number "3" gene_name "Vezf1"; gene_biotype "protein_coding"; oId "ce:circVezf1-827-001"; tissue "ce";
1	ncSplice	gene	192123539	192126027	.	-	.	gene_id "ENSMUSG00000037395"; gene_name "Rcor3"; gene_source "ncSplice"; gene_biotype "protein_coding";
1	ncSplice	transcript	192123539	192126027	.	-	.	gene_id "ENSMUSG00000037395"; transcript_id "mmCircRNA-186"; gene_name "Rcor3"; gene_biotype "protein_coding"; transcript_biotype "circRNA"; oId "ce:circRcor3-844-001"; tissue "ce";
1	ncSplice	exon	192123539	192123617	.	-	.	gene_id "ENSMUSG00000037395"; transcript_id "mmCircRNA-186"; exon_number "1" gene_name "Rcor3"; gene_biotype "protein_coding"; oId "ce:circRcor3-844-001"; tissue "ce";
1	ncSplice	exon	192124243	192124367	.	-	.	gene_id "ENSMUSG00000037395"; transcript_id "mmCircRNA-186"; exon_number "2" gene_name "Rcor3"; gene_biotype "protein_coding"; oId "ce:circRcor3-844-001"; tissue "ce";
1	ncSplice	exon	192125866	192126027	.	-	.	gene_id "ENSMUSG00000037395"; transcript_id "mmCircRNA-186"; exon_number "3" gene_name "Rcor3"; gene_biotype "protein_coding"; oId "ce:circRcor3-844-001"; tissue "ce";
1	ncSplice	gene	192224845	192242037	.	+	.	gene_id "ENSMUSG00000058248"; gene_name "Kcnh1"; gene_source "ncSplice"; gene_biotype "protein_coding";
1	ncSplice	transcript	192224845	192242037	.	+	.	gene_id "ENSMUSG00000058248"; transcript_id "mmCircRNA-187"; gene_name "Kcnh1"; gene_biotype "protein_coding"; transcript_biotype "circRNA"; oId "ce:circKcnh1-847-001"; tissue "ce";
1	ncSplice	exon	192224845	192224951	.	+	.	gene_id "ENSMUSG00000058248"; transcript_id "mmCircRNA-187"; exon_number "1" gene_name "Kcnh1"; gene_biotype "protein_coding"; oId "ce:circKcnh1-847-001"; tissue "ce";
1	ncSplice	exon	192238725	192238853	.	+	.	gene_id "ENSMUSG00000058248"; transcript_id "mmCircRNA-187"; exon_number "2" gene_name "Kcnh1"; gene_biotype "protein_coding"; oId "ce:circKcnh1-847-001"; tissue "ce";
1	ncSplice	exon	192241919	192242037	.	+	.	gene_id "ENSMUSG00000058248"; transcript_id "mmCircRNA-187"; exon_number "3" gene_name "Kcnh1"; gene_biotype "protein_coding"; oId "ce:circKcnh1-847-001"; tissue "ce";
1	ncSplice	gene	192980346	192986882	.	-	.	gene_id "ENSMUSG00000016200"; gene_name "Syt14"; gene_source "ncSplice"; gene_biotype "protein_coding";
1	ncSplice	transcript	192980346	192986882	.	-	.	gene_id "ENSMUSG00000016200"; transcript_id "mmCircRNA-188"; gene_name "Syt14"; gene_biotype "protein_coding"; transcript_biotype "circRNA"; oId "ce:circSyt14-851-001"; tissue "ce";
1	ncSplice	exon	192980346	192980561	.	-	.	gene_id "ENSMUSG00000016200"; transcript_id "mmCircRNA-188"; exon_number "1" gene_name "Syt14"; gene_biotype "protein_coding"; oId "ce:circSyt14-851-001"; tissue "ce";
1	ncSplice	exon	192986718	192986882	.	-	.	gene_id "ENSMUSG00000016200"; transcript_id "mmCircRNA-188"; exon_number "2" gene_name "Syt14"; gene_biotype "protein_coding"; oId "ce:circSyt14-851-001"; tissue "ce";
11	ncSplice	gene	97139472	97149615	.	-	.	gene_id "ENSMUSG00000038517"; gene_name "Tbkbp1"; gene_source "ncSplice"; gene_biotype "protein_coding";
11	ncSplice	transcript	97139472	97149615	.	-	.	gene_id "ENSMUSG00000038517"; transcript_id "mmCircRNA-189"; gene_name "Tbkbp1"; gene_biotype "protein_coding"; transcript_biotype "circRNA"; oId "ce:circTbkbp1-862-004"; tissue "ce";
11	ncSplice	exon	97139472	97139590	.	-	.	gene_id "ENSMUSG00000038517"; transcript_id "mmCircRNA-189"; exon_number "1" gene_name "Tbkbp1"; gene_biotype "protein_coding"; oId "ce:circTbkbp1-862-004"; tissue "ce";
11	ncSplice	exon	97146300	97146361	.	-	.	gene_id "ENSMUSG00000038517"; transcript_id "mmCircRNA-189"; exon_number "2" gene_name "Tbkbp1"; gene_biotype "protein_coding"; oId "ce:circTbkbp1-862-004"; tissue "ce";
11	ncSplice	exon	97146455	97146633	.	-	.	gene_id "ENSMUSG00000038517"; transcript_id "mmCircRNA-189"; exon_number "3" gene_name "Tbkbp1"; gene_biotype "protein_coding"; oId "ce:circTbkbp1-862-004"; tissue "ce";
11	ncSplice	exon	97147373	97147553	.	-	.	gene_id "ENSMUSG00000038517"; transcript_id "mmCircRNA-189"; exon_number "4" gene_name "Tbkbp1"; gene_biotype "protein_coding"; oId "ce:circTbkbp1-862-004"; tissue "ce";
11	ncSplice	exon	97148629	97148733	.	-	.	gene_id "ENSMUSG00000038517"; transcript_id "mmCircRNA-189"; exon_number "5" gene_name "Tbkbp1"; gene_biotype "protein_coding"; oId "ce:circTbkbp1-862-004"; tissue "ce";
11	ncSplice	exon	97148945	97149067	.	-	.	gene_id "ENSMUSG00000038517"; transcript_id "mmCircRNA-189"; exon_number "6" gene_name "Tbkbp1"; gene_biotype "protein_coding"; oId "ce:circTbkbp1-862-004"; tissue "ce";
11	ncSplice	exon	97149362	97149615	.	-	.	gene_id "ENSMUSG00000038517"; transcript_id "mmCircRNA-189"; exon_number "7" gene_name "Tbkbp1"; gene_biotype "protein_coding"; oId "ce:circTbkbp1-862-004"; tissue "ce";
12	ncSplice	gene	100595815	100619641	.	-	.	gene_id "ENSMUSG00000021180"; gene_name "Rps6ka5"; gene_source "ncSplice"; gene_biotype "protein_coding";
12	ncSplice	transcript	100595815	100619641	.	-	.	gene_id "ENSMUSG00000021180"; transcript_id "mmCircRNA-190"; gene_name "Rps6ka5"; gene_biotype "protein_coding"; transcript_biotype "circRNA"; oId "ce:circRps6ka5-887-001"; tissue "ce";
12	ncSplice	exon	100595815	100595918	.	-	.	gene_id "ENSMUSG00000021180"; transcript_id "mmCircRNA-190"; exon_number "1" gene_name "Rps6ka5"; gene_biotype "protein_coding"; oId "ce:circRps6ka5-887-001"; tissue "ce";
12	ncSplice	exon	100597890	100597973	.	-	.	gene_id "ENSMUSG00000021180"; transcript_id "mmCircRNA-190"; exon_number "2" gene_name "Rps6ka5"; gene_biotype "protein_coding"; oId "ce:circRps6ka5-887-001"; tissue "ce";
12	ncSplice	exon	100615997	100616104	.	-	.	gene_id "ENSMUSG00000021180"; transcript_id "mmCircRNA-190"; exon_number "3" gene_name "Rps6ka5"; gene_biotype "protein_coding"; oId "ce:circRps6ka5-887-001"; tissue "ce";
12	ncSplice	exon	100619526	100619641	.	-	.	gene_id "ENSMUSG00000021180"; transcript_id "mmCircRNA-190"; exon_number "4" gene_name "Rps6ka5"; gene_biotype "protein_coding"; oId "ce:circRps6ka5-887-001"; tissue "ce";
12	ncSplice	gene	100615997	100619641	.	-	.	gene_id "ENSMUSG00000021180"; gene_name "Rps6ka5"; gene_source "ncSplice"; gene_biotype "protein_coding";
12	ncSplice	transcript	100615997	100619641	.	-	.	gene_id "ENSMUSG00000021180"; transcript_id "mmCircRNA-191"; gene_name "Rps6ka5"; gene_biotype "protein_coding"; transcript_biotype "circRNA"; oId "ce:circRps6ka5-888-001"; tissue "ce";
12	ncSplice	exon	100615997	100616104	.	-	.	gene_id "ENSMUSG00000021180"; transcript_id "mmCircRNA-191"; exon_number "1" gene_name "Rps6ka5"; gene_biotype "protein_coding"; oId "ce:circRps6ka5-888-001"; tissue "ce";
12	ncSplice	exon	100619526	100619641	.	-	.	gene_id "ENSMUSG00000021180"; transcript_id "mmCircRNA-191"; exon_number "2" gene_name "Rps6ka5"; gene_biotype "protein_coding"; oId "ce:circRps6ka5-888-001"; tissue "ce";
12	ncSplice	gene	102991350	103021876	.	+	.	gene_id "ENSMUSG00000021198"; gene_name "Unc79"; gene_source "ncSplice"; gene_biotype "protein_coding";
12	ncSplice	transcript	102991350	103021876	.	+	.	gene_id "ENSMUSG00000021198"; transcript_id "mmCircRNA-192"; gene_name "Unc79"; gene_biotype "protein_coding"; transcript_biotype "circRNA"; oId "ce:circUnc79-899-002"; tissue "ce";
12	ncSplice	exon	102991350	102991470	.	+	.	gene_id "ENSMUSG00000021198"; transcript_id "mmCircRNA-192"; exon_number "1" gene_name "Unc79"; gene_biotype "protein_coding"; oId "ce:circUnc79-899-002"; tissue "ce";
12	ncSplice	exon	102998597	102998742	.	+	.	gene_id "ENSMUSG00000021198"; transcript_id "mmCircRNA-192"; exon_number "2" gene_name "Unc79"; gene_biotype "protein_coding"; oId "ce:circUnc79-899-002"; tissue "ce";
12	ncSplice	exon	103001806	103001976	.	+	.	gene_id "ENSMUSG00000021198"; transcript_id "mmCircRNA-192"; exon_number "3" gene_name "Unc79"; gene_biotype "protein_coding"; oId "ce:circUnc79-899-002"; tissue "ce";
12	ncSplice	exon	103011200	103011292	.	+	.	gene_id "ENSMUSG00000021198"; transcript_id "mmCircRNA-192"; exon_number "4" gene_name "Unc79"; gene_biotype "protein_coding"; oId "ce:circUnc79-899-002"; tissue "ce";
12	ncSplice	exon	103021007	103021062	.	+	.	gene_id "ENSMUSG00000021198"; transcript_id "mmCircRNA-192"; exon_number "5" gene_name "Unc79"; gene_biotype "protein_coding"; oId "ce:circUnc79-899-002"; tissue "ce";
12	ncSplice	exon	103021747	103021876	.	+	.	gene_id "ENSMUSG00000021198"; transcript_id "mmCircRNA-192"; exon_number "6" gene_name "Unc79"; gene_biotype "protein_coding"; oId "ce:circUnc79-899-002"; tissue "ce";
12	ncSplice	gene	103011200	103021876	.	+	.	gene_id "ENSMUSG00000021198"; gene_name "Unc79"; gene_source "ncSplice"; gene_biotype "protein_coding";
12	ncSplice	transcript	103011200	103021876	.	+	.	gene_id "ENSMUSG00000021198"; transcript_id "mmCircRNA-193"; gene_name "Unc79"; gene_biotype "protein_coding"; transcript_biotype "circRNA"; oId "ce:circUnc79-902-001"; tissue "ce";
12	ncSplice	exon	103011200	103011292	.	+	.	gene_id "ENSMUSG00000021198"; transcript_id "mmCircRNA-193"; exon_number "1" gene_name "Unc79"; gene_biotype "protein_coding"; oId "ce:circUnc79-902-001"; tissue "ce";
12	ncSplice	exon	103021007	103021062	.	+	.	gene_id "ENSMUSG00000021198"; transcript_id "mmCircRNA-193"; exon_number "2" gene_name "Unc79"; gene_biotype "protein_coding"; oId "ce:circUnc79-902-001"; tissue "ce";
12	ncSplice	exon	103021747	103021876	.	+	.	gene_id "ENSMUSG00000021198"; transcript_id "mmCircRNA-193"; exon_number "3" gene_name "Unc79"; gene_biotype "protein_coding"; oId "ce:circUnc79-902-001"; tissue "ce";
12	ncSplice	gene	108157754	108165172	.	-	.	gene_id "ENSMUSG00000056770"; gene_name "Setd3"; gene_source "ncSplice"; gene_biotype "protein_coding";
12	ncSplice	transcript	108157754	108165172	.	-	.	gene_id "ENSMUSG00000056770"; transcript_id "mmCircRNA-194"; gene_name "Setd3"; gene_biotype "protein_coding"; transcript_biotype "circRNA"; oId "ce:circSetd3-908-001|ts:circSetd3-629-003"; tissue "ce|ts";
12	ncSplice	exon	108157754	108158010	.	-	.	gene_id "ENSMUSG00000056770"; transcript_id "mmCircRNA-194"; exon_number "1" gene_name "Setd3"; gene_biotype "protein_coding"; oId "ce:circSetd3-908-001|ts:circSetd3-629-003"; tissue "ce|ts";
12	ncSplice	exon	108158276	108158348	.	-	.	gene_id "ENSMUSG00000056770"; transcript_id "mmCircRNA-194"; exon_number "2" gene_name "Setd3"; gene_biotype "protein_coding"; oId "ce:circSetd3-908-001|ts:circSetd3-629-003"; tissue "ce|ts";
12	ncSplice	exon	108160233	108160381	.	-	.	gene_id "ENSMUSG00000056770"; transcript_id "mmCircRNA-194"; exon_number "3" gene_name "Setd3"; gene_biotype "protein_coding"; oId "ce:circSetd3-908-001|ts:circSetd3-629-003"; tissue "ce|ts";
12	ncSplice	exon	108162973	108163065	.	-	.	gene_id "ENSMUSG00000056770"; transcript_id "mmCircRNA-194"; exon_number "4" gene_name "Setd3"; gene_biotype "protein_coding"; oId "ce:circSetd3-908-001|ts:circSetd3-629-003"; tissue "ce|ts";
12	ncSplice	exon	108165063	108165172	.	-	.	gene_id "ENSMUSG00000056770"; transcript_id "mmCircRNA-194"; exon_number "5" gene_name "Setd3"; gene_biotype "protein_coding"; oId "ce:circSetd3-908-001|ts:circSetd3-629-003"; tissue "ce|ts";
12	ncSplice	gene	111592577	111604564	.	+	.	gene_id "ENSMUSG00000007411"; gene_name "Mark3"; gene_source "ncSplice"; gene_biotype "protein_coding";
12	ncSplice	transcript	111592577	111604564	.	+	.	gene_id "ENSMUSG00000007411"; transcript_id "mmCircRNA-195"; gene_name "Mark3"; gene_biotype "protein_coding"; transcript_biotype "circRNA"; oId "ce:circMark3-919-001"; tissue "ce";
12	ncSplice	exon	111592577	111592768	.	+	.	gene_id "ENSMUSG00000007411"; transcript_id "mmCircRNA-195"; exon_number "1" gene_name "Mark3"; gene_biotype "protein_coding"; oId "ce:circMark3-919-001"; tissue "ce";
12	ncSplice	exon	111604511	111604564	.	+	.	gene_id "ENSMUSG00000007411"; transcript_id "mmCircRNA-195"; exon_number "2" gene_name "Mark3"; gene_biotype "protein_coding"; oId "ce:circMark3-919-001"; tissue "ce";
12	ncSplice	gene	111858210	111872433	.	-	.	gene_id "ENSMUSG00000021285"; gene_name "Ppp1r13b"; gene_source "ncSplice"; gene_biotype "protein_coding";
12	ncSplice	transcript	111858210	111872433	.	-	.	gene_id "ENSMUSG00000021285"; transcript_id "mmCircRNA-196"; gene_name "Ppp1r13b"; gene_biotype "protein_coding"; transcript_biotype "circRNA"; oId "ce:circPpp1r13b-924-001"; tissue "ce";
12	ncSplice	exon	111858210	111858286	.	-	.	gene_id "ENSMUSG00000021285"; transcript_id "mmCircRNA-196"; exon_number "1" gene_name "Ppp1r13b"; gene_biotype "protein_coding"; oId "ce:circPpp1r13b-924-001"; tissue "ce";
12	ncSplice	exon	111866415	111866534	.	-	.	gene_id "ENSMUSG00000021285"; transcript_id "mmCircRNA-196"; exon_number "2" gene_name "Ppp1r13b"; gene_biotype "protein_coding"; oId "ce:circPpp1r13b-924-001"; tissue "ce";
12	ncSplice	exon	111872286	111872433	.	-	.	gene_id "ENSMUSG00000021285"; transcript_id "mmCircRNA-196"; exon_number "3" gene_name "Ppp1r13b"; gene_biotype "protein_coding"; oId "ce:circPpp1r13b-924-001"; tissue "ce";
12	ncSplice	gene	116317830	116324210	.	+	.	gene_id "ENSMUSG00000021171"; gene_name "Esyt2"; gene_source "ncSplice"; gene_biotype "protein_coding";
12	ncSplice	transcript	116317830	116324210	.	+	.	gene_id "ENSMUSG00000021171"; transcript_id "mmCircRNA-197"; gene_name "Esyt2"; gene_biotype "protein_coding"; transcript_biotype "circRNA"; oId "ce:circEsyt2-925-001"; tissue "ce";
12	ncSplice	exon	116317830	116317871	.	+	.	gene_id "ENSMUSG00000021171"; transcript_id "mmCircRNA-197"; exon_number "1" gene_name "Esyt2"; gene_biotype "protein_coding"; oId "ce:circEsyt2-925-001"; tissue "ce";
12	ncSplice	exon	116318804	116318938	.	+	.	gene_id "ENSMUSG00000021171"; transcript_id "mmCircRNA-197"; exon_number "2" gene_name "Esyt2"; gene_biotype "protein_coding"; oId "ce:circEsyt2-925-001"; tissue "ce";
12	ncSplice	exon	116321127	116321203	.	+	.	gene_id "ENSMUSG00000021171"; transcript_id "mmCircRNA-197"; exon_number "3" gene_name "Esyt2"; gene_biotype "protein_coding"; oId "ce:circEsyt2-925-001"; tissue "ce";
12	ncSplice	exon	116323840	116323912	.	+	.	gene_id "ENSMUSG00000021171"; transcript_id "mmCircRNA-197"; exon_number "4" gene_name "Esyt2"; gene_biotype "protein_coding"; oId "ce:circEsyt2-925-001"; tissue "ce";
12	ncSplice	exon	116324121	116324210	.	+	.	gene_id "ENSMUSG00000021171"; transcript_id "mmCircRNA-197"; exon_number "5" gene_name "Esyt2"; gene_biotype "protein_coding"; oId "ce:circEsyt2-925-001"; tissue "ce";
12	ncSplice	gene	117247657	117248700	.	+	.	gene_id "ENSMUSG00000056553"; gene_name "Ptprn2"; gene_source "ncSplice"; gene_biotype "protein_coding";
12	ncSplice	transcript	117247657	117248700	.	+	.	gene_id "ENSMUSG00000056553"; transcript_id "mmCircRNA-198"; gene_name "Ptprn2"; gene_biotype "protein_coding"; transcript_biotype "circRNA"; oId "ce:circPtprn2-926-001"; tissue "ce";
12	ncSplice	exon	117247657	117247776	.	+	.	gene_id "ENSMUSG00000056553"; transcript_id "mmCircRNA-198"; exon_number "1" gene_name "Ptprn2"; gene_biotype "protein_coding"; oId "ce:circPtprn2-926-001"; tissue "ce";
12	ncSplice	exon	117248534	117248700	.	+	.	gene_id "ENSMUSG00000056553"; transcript_id "mmCircRNA-198"; exon_number "2" gene_name "Ptprn2"; gene_biotype "protein_coding"; oId "ce:circPtprn2-926-001"; tissue "ce";
12	ncSplice	gene	13374696	13415731	.	+	.	gene_id "ENSMUSG00000020576"; gene_name "Nbas"; gene_source "ncSplice"; gene_biotype "protein_coding";
12	ncSplice	transcript	13374696	13415731	.	+	.	gene_id "ENSMUSG00000020576"; transcript_id "mmCircRNA-199"; gene_name "Nbas"; gene_biotype "protein_coding"; transcript_biotype "circRNA"; oId "ce:circNbas-938-001"; tissue "ce";
12	ncSplice	exon	13374696	13374829	.	+	.	gene_id "ENSMUSG00000020576"; transcript_id "mmCircRNA-199"; exon_number "1" gene_name "Nbas"; gene_biotype "protein_coding"; oId "ce:circNbas-938-001"; tissue "ce";
12	ncSplice	exon	13377434	13377496	.	+	.	gene_id "ENSMUSG00000020576"; transcript_id "mmCircRNA-199"; exon_number "2" gene_name "Nbas"; gene_biotype "protein_coding"; oId "ce:circNbas-938-001"; tissue "ce";
12	ncSplice	exon	13379647	13379769	.	+	.	gene_id "ENSMUSG00000020576"; transcript_id "mmCircRNA-199"; exon_number "3" gene_name "Nbas"; gene_biotype "protein_coding"; oId "ce:circNbas-938-001"; tissue "ce";
12	ncSplice	exon	13390925	13391027	.	+	.	gene_id "ENSMUSG00000020576"; transcript_id "mmCircRNA-199"; exon_number "4" gene_name "Nbas"; gene_biotype "protein_coding"; oId "ce:circNbas-938-001"; tissue "ce";
12	ncSplice	exon	13393303	13393532	.	+	.	gene_id "ENSMUSG00000020576"; transcript_id "mmCircRNA-199"; exon_number "5" gene_name "Nbas"; gene_biotype "protein_coding"; oId "ce:circNbas-938-001"; tissue "ce";
12	ncSplice	exon	13405374	13405486	.	+	.	gene_id "ENSMUSG00000020576"; transcript_id "mmCircRNA-199"; exon_number "6" gene_name "Nbas"; gene_biotype "protein_coding"; oId "ce:circNbas-938-001"; tissue "ce";
12	ncSplice	exon	13408194	13408307	.	+	.	gene_id "ENSMUSG00000020576"; transcript_id "mmCircRNA-199"; exon_number "7" gene_name "Nbas"; gene_biotype "protein_coding"; oId "ce:circNbas-938-001"; tissue "ce";
12	ncSplice	exon	13413528	13413641	.	+	.	gene_id "ENSMUSG00000020576"; transcript_id "mmCircRNA-199"; exon_number "8" gene_name "Nbas"; gene_biotype "protein_coding"; oId "ce:circNbas-938-001"; tissue "ce";
12	ncSplice	exon	13414784	13414941	.	+	.	gene_id "ENSMUSG00000020576"; transcript_id "mmCircRNA-199"; exon_number "9" gene_name "Nbas"; gene_biotype "protein_coding"; oId "ce:circNbas-938-001"; tissue "ce";
12	ncSplice	exon	13415645	13415731	.	+	.	gene_id "ENSMUSG00000020576"; transcript_id "mmCircRNA-199"; exon_number "10" gene_name "Nbas"; gene_biotype "protein_coding"; oId "ce:circNbas-938-001"; tissue "ce";
12	ncSplice	gene	13482386	13484044	.	+	.	gene_id "ENSMUSG00000020576"; gene_name "Nbas"; gene_source "ncSplice"; gene_biotype "protein_coding";
12	ncSplice	transcript	13482386	13484044	.	+	.	gene_id "ENSMUSG00000020576"; transcript_id "mmCircRNA-200"; gene_name "Nbas"; gene_biotype "protein_coding"; transcript_biotype "circRNA"; oId "ce:circNbas-942-001|ts:circNbas-665-001"; tissue "ce|ts";
12	ncSplice	exon	13482386	13482636	.	+	.	gene_id "ENSMUSG00000020576"; transcript_id "mmCircRNA-200"; exon_number "1" gene_name "Nbas"; gene_biotype "protein_coding"; oId "ce:circNbas-942-001|ts:circNbas-665-001"; tissue "ce|ts";
12	ncSplice	exon	13483710	13484044	.	+	.	gene_id "ENSMUSG00000020576"; transcript_id "mmCircRNA-200"; exon_number "2" gene_name "Nbas"; gene_biotype "protein_coding"; oId "ce:circNbas-942-001|ts:circNbas-665-001"; tissue "ce|ts";
1	ncSplice	gene	22346293	22379540	.	-	.	gene_id "ENSMUSG00000041670"; gene_name "Rims1"; gene_source "ncSplice"; gene_biotype "protein_coding";
1	ncSplice	transcript	22346293	22379540	.	-	.	gene_id "ENSMUSG00000041670"; transcript_id "mmCircRNA-201"; gene_name "Rims1"; gene_biotype "protein_coding"; transcript_biotype "circRNA"; oId "ce:circRims1-948-001"; tissue "ce";
1	ncSplice	exon	22346293	22346528	.	-	.	gene_id "ENSMUSG00000041670"; transcript_id "mmCircRNA-201"; exon_number "1" gene_name "Rims1"; gene_biotype "protein_coding"; oId "ce:circRims1-948-001"; tissue "ce";
1	ncSplice	exon	22373344	22373510	.	-	.	gene_id "ENSMUSG00000041670"; transcript_id "mmCircRNA-201"; exon_number "2" gene_name "Rims1"; gene_biotype "protein_coding"; oId "ce:circRims1-948-001"; tissue "ce";
1	ncSplice	exon	22379428	22379540	.	-	.	gene_id "ENSMUSG00000041670"; transcript_id "mmCircRNA-201"; exon_number "3" gene_name "Rims1"; gene_biotype "protein_coding"; oId "ce:circRims1-948-001"; tissue "ce";
1	ncSplice	gene	22346293	22393948	.	-	.	gene_id "ENSMUSG00000041670"; gene_name "Rims1"; gene_source "ncSplice"; gene_biotype "protein_coding";
1	ncSplice	transcript	22346293	22393948	.	-	.	gene_id "ENSMUSG00000041670"; transcript_id "mmCircRNA-202"; gene_name "Rims1"; gene_biotype "protein_coding"; transcript_biotype "circRNA"; oId "ce:circRims1-950-002"; tissue "ce";
1	ncSplice	exon	22346293	22346528	.	-	.	gene_id "ENSMUSG00000041670"; transcript_id "mmCircRNA-202"; exon_number "1" gene_name "Rims1"; gene_biotype "protein_coding"; oId "ce:circRims1-950-002"; tissue "ce";
1	ncSplice	exon	22373344	22373510	.	-	.	gene_id "ENSMUSG00000041670"; transcript_id "mmCircRNA-202"; exon_number "2" gene_name "Rims1"; gene_biotype "protein_coding"; oId "ce:circRims1-950-002"; tissue "ce";
1	ncSplice	exon	22379428	22390623	.	-	.	gene_id "ENSMUSG00000041670"; transcript_id "mmCircRNA-202"; exon_number "3" gene_name "Rims1"; gene_biotype "protein_coding"; oId "ce:circRims1-950-002"; tissue "ce";
1	ncSplice	exon	22393919	22393948	.	-	.	gene_id "ENSMUSG00000041670"; transcript_id "mmCircRNA-202"; exon_number "4" gene_name "Rims1"; gene_biotype "protein_coding"; oId "ce:circRims1-950-002"; tissue "ce";
1	ncSplice	gene	22346293	22397563	.	-	.	gene_id "ENSMUSG00000041670"; gene_name "Rims1"; gene_source "ncSplice"; gene_biotype "protein_coding";
1	ncSplice	transcript	22346293	22397563	.	-	.	gene_id "ENSMUSG00000041670"; transcript_id "mmCircRNA-203"; gene_name "Rims1"; gene_biotype "protein_coding"; transcript_biotype "circRNA"; oId "ce:circRims1-951-001"; tissue "ce";
1	ncSplice	exon	22346293	22346528	.	-	.	gene_id "ENSMUSG00000041670"; transcript_id "mmCircRNA-203"; exon_number "1" gene_name "Rims1"; gene_biotype "protein_coding"; oId "ce:circRims1-951-001"; tissue "ce";
1	ncSplice	exon	22373344	22373510	.	-	.	gene_id "ENSMUSG00000041670"; transcript_id "mmCircRNA-203"; exon_number "2" gene_name "Rims1"; gene_biotype "protein_coding"; oId "ce:circRims1-951-001"; tissue "ce";
1	ncSplice	exon	22379428	22379540	.	-	.	gene_id "ENSMUSG00000041670"; transcript_id "mmCircRNA-203"; exon_number "3" gene_name "Rims1"; gene_biotype "protein_coding"; oId "ce:circRims1-951-001"; tissue "ce";
1	ncSplice	exon	22397451	22397563	.	-	.	gene_id "ENSMUSG00000041670"; transcript_id "mmCircRNA-203"; exon_number "4" gene_name "Rims1"; gene_biotype "protein_coding"; oId "ce:circRims1-951-001"; tissue "ce";
1	ncSplice	gene	22373344	22379540	.	-	.	gene_id "ENSMUSG00000041670"; gene_name "Rims1"; gene_source "ncSplice"; gene_biotype "protein_coding";
1	ncSplice	transcript	22373344	22379540	.	-	.	gene_id "ENSMUSG00000041670"; transcript_id "mmCircRNA-204"; gene_name "Rims1"; gene_biotype "protein_coding"; transcript_biotype "circRNA"; oId "ce:circRims1-953-001"; tissue "ce";
1	ncSplice	exon	22373344	22373510	.	-	.	gene_id "ENSMUSG00000041670"; transcript_id "mmCircRNA-204"; exon_number "1" gene_name "Rims1"; gene_biotype "protein_coding"; oId "ce:circRims1-953-001"; tissue "ce";
1	ncSplice	exon	22379428	22379540	.	-	.	gene_id "ENSMUSG00000041670"; transcript_id "mmCircRNA-204"; exon_number "2" gene_name "Rims1"; gene_biotype "protein_coding"; oId "ce:circRims1-953-001"; tissue "ce";
1	ncSplice	gene	22373344	22397563	.	-	.	gene_id "ENSMUSG00000041670"; gene_name "Rims1"; gene_source "ncSplice"; gene_biotype "protein_coding";
1	ncSplice	transcript	22373344	22397563	.	-	.	gene_id "ENSMUSG00000041670"; transcript_id "mmCircRNA-205"; gene_name "Rims1"; gene_biotype "protein_coding"; transcript_biotype "circRNA"; oId "ce:circRims1-954-001"; tissue "ce";
1	ncSplice	exon	22373344	22373510	.	-	.	gene_id "ENSMUSG00000041670"; transcript_id "mmCircRNA-205"; exon_number "1" gene_name "Rims1"; gene_biotype "protein_coding"; oId "ce:circRims1-954-001"; tissue "ce";
1	ncSplice	exon	22379428	22379540	.	-	.	gene_id "ENSMUSG00000041670"; transcript_id "mmCircRNA-205"; exon_number "2" gene_name "Rims1"; gene_biotype "protein_coding"; oId "ce:circRims1-954-001"; tissue "ce";
1	ncSplice	exon	22397451	22397563	.	-	.	gene_id "ENSMUSG00000041670"; transcript_id "mmCircRNA-205"; exon_number "3" gene_name "Rims1"; gene_biotype "protein_coding"; oId "ce:circRims1-954-001"; tissue "ce";
12	ncSplice	gene	24878191	24882794	.	+	.	gene_id "ENSMUSG00000020646"; gene_name "Mboat2"; gene_source "ncSplice"; gene_biotype "protein_coding";
12	ncSplice	transcript	24878191	24882794	.	+	.	gene_id "ENSMUSG00000020646"; transcript_id "mmCircRNA-206"; gene_name "Mboat2"; gene_biotype "protein_coding"; transcript_biotype "circRNA"; oId "ce:circMboat2-962-001|ts:circMboat2-676-001"; tissue "ce|ts";
12	ncSplice	exon	24878191	24878336	.	+	.	gene_id "ENSMUSG00000020646"; transcript_id "mmCircRNA-206"; exon_number "1" gene_name "Mboat2"; gene_biotype "protein_coding"; oId "ce:circMboat2-962-001|ts:circMboat2-676-001"; tissue "ce|ts";
12	ncSplice	exon	24882717	24882794	.	+	.	gene_id "ENSMUSG00000020646"; transcript_id "mmCircRNA-206"; exon_number "2" gene_name "Mboat2"; gene_biotype "protein_coding"; oId "ce:circMboat2-962-001|ts:circMboat2-676-001"; tissue "ce|ts";
12	ncSplice	gene	24878191	24924294	.	+	.	gene_id "ENSMUSG00000020646"; gene_name "Mboat2"; gene_source "ncSplice"; gene_biotype "protein_coding";
12	ncSplice	transcript	24878191	24924294	.	+	.	gene_id "ENSMUSG00000020646"; transcript_id "mmCircRNA-207"; gene_name "Mboat2"; gene_biotype "protein_coding"; transcript_biotype "circRNA"; oId "ce:circMboat2-963-001|ts:circMboat2-677-001"; tissue "ce|ts";
12	ncSplice	exon	24878191	24878336	.	+	.	gene_id "ENSMUSG00000020646"; transcript_id "mmCircRNA-207"; exon_number "1" gene_name "Mboat2"; gene_biotype "protein_coding"; oId "ce:circMboat2-963-001|ts:circMboat2-677-001"; tissue "ce|ts";
12	ncSplice	exon	24882717	24882794	.	+	.	gene_id "ENSMUSG00000020646"; transcript_id "mmCircRNA-207"; exon_number "2" gene_name "Mboat2"; gene_biotype "protein_coding"; oId "ce:circMboat2-963-001|ts:circMboat2-677-001"; tissue "ce|ts";
12	ncSplice	exon	24924199	24924294	.	+	.	gene_id "ENSMUSG00000020646"; transcript_id "mmCircRNA-207"; exon_number "3" gene_name "Mboat2"; gene_biotype "protein_coding"; oId "ce:circMboat2-963-001|ts:circMboat2-677-001"; tissue "ce|ts";
12	ncSplice	gene	24878191	24934622	.	+	.	gene_id "ENSMUSG00000020646"; gene_name "Mboat2"; gene_source "ncSplice"; gene_biotype "protein_coding";
12	ncSplice	transcript	24878191	24934622	.	+	.	gene_id "ENSMUSG00000020646"; transcript_id "mmCircRNA-208"; gene_name "Mboat2"; gene_biotype "protein_coding"; transcript_biotype "circRNA"; oId "ce:circMboat2-964-001"; tissue "ce";
12	ncSplice	exon	24878191	24878336	.	+	.	gene_id "ENSMUSG00000020646"; transcript_id "mmCircRNA-208"; exon_number "1" gene_name "Mboat2"; gene_biotype "protein_coding"; oId "ce:circMboat2-964-001"; tissue "ce";
12	ncSplice	exon	24882717	24882794	.	+	.	gene_id "ENSMUSG00000020646"; transcript_id "mmCircRNA-208"; exon_number "2" gene_name "Mboat2"; gene_biotype "protein_coding"; oId "ce:circMboat2-964-001"; tissue "ce";
12	ncSplice	exon	24924199	24924294	.	+	.	gene_id "ENSMUSG00000020646"; transcript_id "mmCircRNA-208"; exon_number "3" gene_name "Mboat2"; gene_biotype "protein_coding"; oId "ce:circMboat2-964-001"; tissue "ce";
12	ncSplice	exon	24934567	24934622	.	+	.	gene_id "ENSMUSG00000020646"; transcript_id "mmCircRNA-208"; exon_number "4" gene_name "Mboat2"; gene_biotype "protein_coding"; oId "ce:circMboat2-964-001"; tissue "ce";
1	ncSplice	gene	22533399	22538623	.	-	.	gene_id "ENSMUSG00000041670"; gene_name "Rims1"; gene_source "ncSplice"; gene_biotype "protein_coding";
1	ncSplice	transcript	22533399	22538623	.	-	.	gene_id "ENSMUSG00000041670"; transcript_id "mmCircRNA-209"; gene_name "Rims1"; gene_biotype "protein_coding"; transcript_biotype "circRNA"; oId "ce:circRims1-967-001"; tissue "ce";
1	ncSplice	exon	22533399	22533468	.	-	.	gene_id "ENSMUSG00000041670"; transcript_id "mmCircRNA-209"; exon_number "1" gene_name "Rims1"; gene_biotype "protein_coding"; oId "ce:circRims1-967-001"; tissue "ce";
1	ncSplice	exon	22533796	22533796	.	-	.	gene_id "ENSMUSG00000041670"; transcript_id "mmCircRNA-209"; exon_number "2" gene_name "Rims1"; gene_biotype "protein_coding"; oId "ce:circRims1-967-001"; tissue "ce";
1	ncSplice	exon	22534004	22534240	.	-	.	gene_id "ENSMUSG00000041670"; transcript_id "mmCircRNA-209"; exon_number "3" gene_name "Rims1"; gene_biotype "protein_coding"; oId "ce:circRims1-967-001"; tissue "ce";
1	ncSplice	exon	22538286	22538623	.	-	.	gene_id "ENSMUSG00000041670"; transcript_id "mmCircRNA-209"; exon_number "4" gene_name "Rims1"; gene_biotype "protein_coding"; oId "ce:circRims1-967-001"; tissue "ce";
12	ncSplice	gene	3237285	3238112	.	+	.	gene_id "ENSMUSG00000079179"; gene_name "Rab10os"; gene_source "ncSplice"; gene_biotype "antisense";
12	ncSplice	transcript	3237285	3238112	.	+	.	gene_id "ENSMUSG00000079179"; transcript_id "mmCircRNA-210"; gene_name "Rab10os"; gene_biotype "antisense"; transcript_biotype "circRNA"; oId "ce:circRab10os-983-001"; tissue "ce";
12	ncSplice	exon	3237285	3237412	.	+	.	gene_id "ENSMUSG00000079179"; transcript_id "mmCircRNA-210"; exon_number "1" gene_name "Rab10os"; gene_biotype "antisense"; oId "ce:circRab10os-983-001"; tissue "ce";
12	ncSplice	exon	3237591	3237660	.	+	.	gene_id "ENSMUSG00000079179"; transcript_id "mmCircRNA-210"; exon_number "2" gene_name "Rab10os"; gene_biotype "antisense"; oId "ce:circRab10os-983-001"; tissue "ce";
12	ncSplice	exon	3238064	3238112	.	+	.	gene_id "ENSMUSG00000079179"; transcript_id "mmCircRNA-210"; exon_number "3" gene_name "Rab10os"; gene_biotype "antisense"; oId "ce:circRab10os-983-001"; tissue "ce";
12	ncSplice	gene	35078900	35086984	.	+	.	gene_id "ENSMUSG00000020590"; gene_name "Snx13"; gene_source "ncSplice"; gene_biotype "protein_coding";
12	ncSplice	transcript	35078900	35086984	.	+	.	gene_id "ENSMUSG00000020590"; transcript_id "mmCircRNA-211"; gene_name "Snx13"; gene_biotype "protein_coding"; transcript_biotype "circRNA"; oId "ce:circSnx13-993-001"; tissue "ce";
12	ncSplice	exon	35078900	35079012	.	+	.	gene_id "ENSMUSG00000020590"; transcript_id "mmCircRNA-211"; exon_number "1" gene_name "Snx13"; gene_biotype "protein_coding"; oId "ce:circSnx13-993-001"; tissue "ce";
12	ncSplice	exon	35082869	35082971	.	+	.	gene_id "ENSMUSG00000020590"; transcript_id "mmCircRNA-211"; exon_number "2" gene_name "Snx13"; gene_biotype "protein_coding"; oId "ce:circSnx13-993-001"; tissue "ce";
12	ncSplice	exon	35085939	35086028	.	+	.	gene_id "ENSMUSG00000020590"; transcript_id "mmCircRNA-211"; exon_number "3" gene_name "Snx13"; gene_biotype "protein_coding"; oId "ce:circSnx13-993-001"; tissue "ce";
12	ncSplice	exon	35086863	35086984	.	+	.	gene_id "ENSMUSG00000020590"; transcript_id "mmCircRNA-211"; exon_number "4" gene_name "Snx13"; gene_biotype "protein_coding"; oId "ce:circSnx13-993-001"; tissue "ce";
12	ncSplice	gene	3617606	3686862	.	+	.	gene_id "ENSMUSG00000071454"; gene_name "Dtnb"; gene_source "ncSplice"; gene_biotype "protein_coding";
12	ncSplice	transcript	3617606	3686862	.	+	.	gene_id "ENSMUSG00000071454"; transcript_id "mmCircRNA-212"; gene_name "Dtnb"; gene_biotype "protein_coding"; transcript_biotype "circRNA"; oId "ce:circDtnb-1005-001|ts:circDtnb-704-001"; tissue "ce|ts";
12	ncSplice	exon	3617606	3617691	.	+	.	gene_id "ENSMUSG00000071454"; transcript_id "mmCircRNA-212"; exon_number "1" gene_name "Dtnb"; gene_biotype "protein_coding"; oId "ce:circDtnb-1005-001|ts:circDtnb-704-001"; tissue "ce|ts";
12	ncSplice	exon	3632810	3632964	.	+	.	gene_id "ENSMUSG00000071454"; transcript_id "mmCircRNA-212"; exon_number "2" gene_name "Dtnb"; gene_biotype "protein_coding"; oId "ce:circDtnb-1005-001|ts:circDtnb-704-001"; tissue "ce|ts";
12	ncSplice	exon	3643917	3644022	.	+	.	gene_id "ENSMUSG00000071454"; transcript_id "mmCircRNA-212"; exon_number "3" gene_name "Dtnb"; gene_biotype "protein_coding"; oId "ce:circDtnb-1005-001|ts:circDtnb-704-001"; tissue "ce|ts";
12	ncSplice	exon	3648223	3648389	.	+	.	gene_id "ENSMUSG00000071454"; transcript_id "mmCircRNA-212"; exon_number "4" gene_name "Dtnb"; gene_biotype "protein_coding"; oId "ce:circDtnb-1005-001|ts:circDtnb-704-001"; tissue "ce|ts";
12	ncSplice	exon	3686738	3686862	.	+	.	gene_id "ENSMUSG00000071454"; transcript_id "mmCircRNA-212"; exon_number "5" gene_name "Dtnb"; gene_biotype "protein_coding"; oId "ce:circDtnb-1005-001|ts:circDtnb-704-001"; tissue "ce|ts";
12	ncSplice	gene	3632810	3648389	.	+	.	gene_id "ENSMUSG00000071454"; gene_name "Dtnb"; gene_source "ncSplice"; gene_biotype "protein_coding";
12	ncSplice	transcript	3632810	3648389	.	+	.	gene_id "ENSMUSG00000071454"; transcript_id "mmCircRNA-213"; gene_name "Dtnb"; gene_biotype "protein_coding"; transcript_biotype "circRNA"; oId "ce:circDtnb-1006-001"; tissue "ce";
12	ncSplice	exon	3632810	3632964	.	+	.	gene_id "ENSMUSG00000071454"; transcript_id "mmCircRNA-213"; exon_number "1" gene_name "Dtnb"; gene_biotype "protein_coding"; oId "ce:circDtnb-1006-001"; tissue "ce";
12	ncSplice	exon	3643917	3644022	.	+	.	gene_id "ENSMUSG00000071454"; transcript_id "mmCircRNA-213"; exon_number "2" gene_name "Dtnb"; gene_biotype "protein_coding"; oId "ce:circDtnb-1006-001"; tissue "ce";
12	ncSplice	exon	3648223	3648389	.	+	.	gene_id "ENSMUSG00000071454"; transcript_id "mmCircRNA-213"; exon_number "3" gene_name "Dtnb"; gene_biotype "protein_coding"; oId "ce:circDtnb-1006-001"; tissue "ce";
12	ncSplice	gene	40668406	40676790	.	+	.	gene_id "ENSMUSG00000035954"; gene_name "Dock4"; gene_source "ncSplice"; gene_biotype "protein_coding";
12	ncSplice	transcript	40668406	40676790	.	+	.	gene_id "ENSMUSG00000035954"; transcript_id "mmCircRNA-214"; gene_name "Dock4"; gene_biotype "protein_coding"; transcript_biotype "circRNA"; oId "ce:circDock4-1028-001"; tissue "ce";
12	ncSplice	exon	40668406	40668487	.	+	.	gene_id "ENSMUSG00000035954"; transcript_id "mmCircRNA-214"; exon_number "1" gene_name "Dock4"; gene_biotype "protein_coding"; oId "ce:circDock4-1028-001"; tissue "ce";
12	ncSplice	exon	40669008	40669068	.	+	.	gene_id "ENSMUSG00000035954"; transcript_id "mmCircRNA-214"; exon_number "2" gene_name "Dock4"; gene_biotype "protein_coding"; oId "ce:circDock4-1028-001"; tissue "ce";
12	ncSplice	exon	40672741	40672873	.	+	.	gene_id "ENSMUSG00000035954"; transcript_id "mmCircRNA-214"; exon_number "3" gene_name "Dock4"; gene_biotype "protein_coding"; oId "ce:circDock4-1028-001"; tissue "ce";
12	ncSplice	exon	40676702	40676790	.	+	.	gene_id "ENSMUSG00000035954"; transcript_id "mmCircRNA-214"; exon_number "4" gene_name "Dock4"; gene_biotype "protein_coding"; oId "ce:circDock4-1028-001"; tissue "ce";
1	ncSplice	gene	24085411	24086611	.	-	.	gene_id "ENSMUSG00000026153"; gene_name "Fam135a"; gene_source "ncSplice"; gene_biotype "protein_coding";
1	ncSplice	transcript	24085411	24086611	.	-	.	gene_id "ENSMUSG00000026153"; transcript_id "mmCircRNA-215"; gene_name "Fam135a"; gene_biotype "protein_coding"; transcript_biotype "circRNA"; oId "ce:circFam135a-1031-001"; tissue "ce";
1	ncSplice	exon	24085411	24085526	.	-	.	gene_id "ENSMUSG00000026153"; transcript_id "mmCircRNA-215"; exon_number "1" gene_name "Fam135a"; gene_biotype "protein_coding"; oId "ce:circFam135a-1031-001"; tissue "ce";
1	ncSplice	exon	24086520	24086611	.	-	.	gene_id "ENSMUSG00000026153"; transcript_id "mmCircRNA-215"; exon_number "2" gene_name "Fam135a"; gene_biotype "protein_coding"; oId "ce:circFam135a-1031-001"; tissue "ce";
12	ncSplice	gene	4961218	5006791	.	+	.	gene_id "ENSMUSG00000052812"; gene_name "Atad2b"; gene_source "ncSplice"; gene_biotype "protein_coding";
12	ncSplice	transcript	4961218	5006791	.	+	.	gene_id "ENSMUSG00000052812"; transcript_id "mmCircRNA-216"; gene_name "Atad2b"; gene_biotype "protein_coding"; transcript_biotype "circRNA"; oId "ce:circAtad2b-1038-001"; tissue "ce";
12	ncSplice	exon	4961218	4961306	.	+	.	gene_id "ENSMUSG00000052812"; transcript_id "mmCircRNA-216"; exon_number "1" gene_name "Atad2b"; gene_biotype "protein_coding"; oId "ce:circAtad2b-1038-001"; tissue "ce";
12	ncSplice	exon	4965841	4966000	.	+	.	gene_id "ENSMUSG00000052812"; transcript_id "mmCircRNA-216"; exon_number "2" gene_name "Atad2b"; gene_biotype "protein_coding"; oId "ce:circAtad2b-1038-001"; tissue "ce";
12	ncSplice	exon	4969352	4969442	.	+	.	gene_id "ENSMUSG00000052812"; transcript_id "mmCircRNA-216"; exon_number "3" gene_name "Atad2b"; gene_biotype "protein_coding"; oId "ce:circAtad2b-1038-001"; tissue "ce";
12	ncSplice	exon	4973968	4974264	.	+	.	gene_id "ENSMUSG00000052812"; transcript_id "mmCircRNA-216"; exon_number "4" gene_name "Atad2b"; gene_biotype "protein_coding"; oId "ce:circAtad2b-1038-001"; tissue "ce";
12	ncSplice	exon	4982433	4985724	.	+	.	gene_id "ENSMUSG00000052812"; transcript_id "mmCircRNA-216"; exon_number "5" gene_name "Atad2b"; gene_biotype "protein_coding"; oId "ce:circAtad2b-1038-001"; tissue "ce";
12	ncSplice	exon	4990888	4991058	.	+	.	gene_id "ENSMUSG00000052812"; transcript_id "mmCircRNA-216"; exon_number "6" gene_name "Atad2b"; gene_biotype "protein_coding"; oId "ce:circAtad2b-1038-001"; tissue "ce";
12	ncSplice	exon	5006606	5006791	.	+	.	gene_id "ENSMUSG00000052812"; transcript_id "mmCircRNA-216"; exon_number "7" gene_name "Atad2b"; gene_biotype "protein_coding"; oId "ce:circAtad2b-1038-001"; tissue "ce";
1	ncSplice	gene	25126641	25131401	.	-	.	gene_id "ENSMUSG00000033569"; gene_name "Bai3"; gene_source "ncSplice"; gene_biotype "protein_coding";
1	ncSplice	transcript	25126641	25131401	.	-	.	gene_id "ENSMUSG00000033569"; transcript_id "mmCircRNA-217"; gene_name "Bai3"; gene_biotype "protein_coding"; transcript_biotype "circRNA"; oId "ce:circBai3-1043-001"; tissue "ce";
1	ncSplice	exon	25126641	25126707	.	-	.	gene_id "ENSMUSG00000033569"; transcript_id "mmCircRNA-217"; exon_number "1" gene_name "Bai3"; gene_biotype "protein_coding"; oId "ce:circBai3-1043-001"; tissue "ce";
1	ncSplice	exon	25128819	25128888	.	-	.	gene_id "ENSMUSG00000033569"; transcript_id "mmCircRNA-217"; exon_number "2" gene_name "Bai3"; gene_biotype "protein_coding"; oId "ce:circBai3-1043-001"; tissue "ce";
1	ncSplice	exon	25131251	25131401	.	-	.	gene_id "ENSMUSG00000033569"; transcript_id "mmCircRNA-217"; exon_number "3" gene_name "Bai3"; gene_biotype "protein_coding"; oId "ce:circBai3-1043-001"; tissue "ce";
12	ncSplice	gene	51716942	51723048	.	+	.	gene_id "ENSMUSG00000020955"; gene_name "Ap4s1"; gene_source "ncSplice"; gene_biotype "protein_coding";
12	ncSplice	transcript	51716942	51723048	.	+	.	gene_id "ENSMUSG00000020955"; transcript_id "mmCircRNA-218"; gene_name "Ap4s1"; gene_biotype "protein_coding"; transcript_biotype "circRNA"; oId "ce:circAp4s1-1048-001"; tissue "ce";
12	ncSplice	exon	51716942	51717150	.	+	.	gene_id "ENSMUSG00000020955"; transcript_id "mmCircRNA-218"; exon_number "1" gene_name "Ap4s1"; gene_biotype "protein_coding"; oId "ce:circAp4s1-1048-001"; tissue "ce";
12	ncSplice	exon	51720636	51720722	.	+	.	gene_id "ENSMUSG00000020955"; transcript_id "mmCircRNA-218"; exon_number "2" gene_name "Ap4s1"; gene_biotype "protein_coding"; oId "ce:circAp4s1-1048-001"; tissue "ce";
12	ncSplice	exon	51722980	51723048	.	+	.	gene_id "ENSMUSG00000020955"; transcript_id "mmCircRNA-218"; exon_number "3" gene_name "Ap4s1"; gene_biotype "protein_coding"; oId "ce:circAp4s1-1048-001"; tissue "ce";
12	ncSplice	gene	51772274	51772705	.	-	.	gene_id "ENSMUSG00000035247"; gene_name "Hectd1"; gene_source "ncSplice"; gene_biotype "protein_coding";
12	ncSplice	transcript	51772274	51772705	.	-	.	gene_id "ENSMUSG00000035247"; transcript_id "mmCircRNA-219"; gene_name "Hectd1"; gene_biotype "protein_coding"; transcript_biotype "circRNA"; oId "ce:circHectd1-1050-001|ts:circHectd1-748-001"; tissue "ce|ts";
12	ncSplice	exon	51772274	51772450	.	-	.	gene_id "ENSMUSG00000035247"; transcript_id "mmCircRNA-219"; exon_number "1" gene_name "Hectd1"; gene_biotype "protein_coding"; oId "ce:circHectd1-1050-001|ts:circHectd1-748-001"; tissue "ce|ts";
12	ncSplice	exon	51772539	51772705	.	-	.	gene_id "ENSMUSG00000035247"; transcript_id "mmCircRNA-219"; exon_number "2" gene_name "Hectd1"; gene_biotype "protein_coding"; oId "ce:circHectd1-1050-001|ts:circHectd1-748-001"; tissue "ce|ts";
1	ncSplice	gene	25221760	25228547	.	-	.	gene_id "ENSMUSG00000033569"; gene_name "Bai3"; gene_source "ncSplice"; gene_biotype "protein_coding";
1	ncSplice	transcript	25221760	25228547	.	-	.	gene_id "ENSMUSG00000033569"; transcript_id "mmCircRNA-220"; gene_name "Bai3"; gene_biotype "protein_coding"; transcript_biotype "circRNA"; oId "ce:circBai3-1051-001"; tissue "ce";
1	ncSplice	exon	25221760	25221862	.	-	.	gene_id "ENSMUSG00000033569"; transcript_id "mmCircRNA-220"; exon_number "1" gene_name "Bai3"; gene_biotype "protein_coding"; oId "ce:circBai3-1051-001"; tissue "ce";
1	ncSplice	exon	25226720	25226823	.	-	.	gene_id "ENSMUSG00000033569"; transcript_id "mmCircRNA-220"; exon_number "2" gene_name "Bai3"; gene_biotype "protein_coding"; oId "ce:circBai3-1051-001"; tissue "ce";
1	ncSplice	exon	25228421	25228547	.	-	.	gene_id "ENSMUSG00000033569"; transcript_id "mmCircRNA-220"; exon_number "3" gene_name "Bai3"; gene_biotype "protein_coding"; oId "ce:circBai3-1051-001"; tissue "ce";
12	ncSplice	gene	52937135	52938506	.	+	.	gene_id "ENSMUSG00000061603"; gene_name "Akap6"; gene_source "ncSplice"; gene_biotype "protein_coding";
12	ncSplice	transcript	52937135	52938506	.	+	.	gene_id "ENSMUSG00000061603"; transcript_id "mmCircRNA-221"; gene_name "Akap6"; gene_biotype "protein_coding"; transcript_biotype "circRNA"; oId "ce:circAkap6-1053-001"; tissue "ce";
12	ncSplice	exon	52937135	52937231	.	+	.	gene_id "ENSMUSG00000061603"; transcript_id "mmCircRNA-221"; exon_number "1" gene_name "Akap6"; gene_biotype "protein_coding"; oId "ce:circAkap6-1053-001"; tissue "ce";
12	ncSplice	exon	52938343	52938506	.	+	.	gene_id "ENSMUSG00000061603"; transcript_id "mmCircRNA-221"; exon_number "2" gene_name "Akap6"; gene_biotype "protein_coding"; oId "ce:circAkap6-1053-001"; tissue "ce";
1	ncSplice	gene	25531870	25559865	.	-	.	gene_id "ENSMUSG00000033569"; gene_name "Bai3"; gene_source "ncSplice"; gene_biotype "protein_coding";
1	ncSplice	transcript	25531870	25559865	.	-	.	gene_id "ENSMUSG00000033569"; transcript_id "mmCircRNA-222"; gene_name "Bai3"; gene_biotype "protein_coding"; transcript_biotype "circRNA"; oId "ce:circBai3-1069-001"; tissue "ce";
1	ncSplice	exon	25531870	25532034	.	-	.	gene_id "ENSMUSG00000033569"; transcript_id "mmCircRNA-222"; exon_number "1" gene_name "Bai3"; gene_biotype "protein_coding"; oId "ce:circBai3-1069-001"; tissue "ce";
1	ncSplice	exon	25532475	25532639	.	-	.	gene_id "ENSMUSG00000033569"; transcript_id "mmCircRNA-222"; exon_number "2" gene_name "Bai3"; gene_biotype "protein_coding"; oId "ce:circBai3-1069-001"; tissue "ce";
1	ncSplice	exon	25547416	25547580	.	-	.	gene_id "ENSMUSG00000033569"; transcript_id "mmCircRNA-222"; exon_number "3" gene_name "Bai3"; gene_biotype "protein_coding"; oId "ce:circBai3-1069-001"; tissue "ce";
1	ncSplice	exon	25553675	25553836	.	-	.	gene_id "ENSMUSG00000033569"; transcript_id "mmCircRNA-222"; exon_number "4" gene_name "Bai3"; gene_biotype "protein_coding"; oId "ce:circBai3-1069-001"; tissue "ce";
1	ncSplice	exon	25559755	25559865	.	-	.	gene_id "ENSMUSG00000033569"; transcript_id "mmCircRNA-222"; exon_number "5" gene_name "Bai3"; gene_biotype "protein_coding"; oId "ce:circBai3-1069-001"; tissue "ce";
1	ncSplice	gene	25547416	25559865	.	-	.	gene_id "ENSMUSG00000033569"; gene_name "Bai3"; gene_source "ncSplice"; gene_biotype "protein_coding";
1	ncSplice	transcript	25547416	25559865	.	-	.	gene_id "ENSMUSG00000033569"; transcript_id "mmCircRNA-223"; gene_name "Bai3"; gene_biotype "protein_coding"; transcript_biotype "circRNA"; oId "ce:circBai3-1070-001"; tissue "ce";
1	ncSplice	exon	25547416	25547580	.	-	.	gene_id "ENSMUSG00000033569"; transcript_id "mmCircRNA-223"; exon_number "1" gene_name "Bai3"; gene_biotype "protein_coding"; oId "ce:circBai3-1070-001"; tissue "ce";
1	ncSplice	exon	25553675	25553836	.	-	.	gene_id "ENSMUSG00000033569"; transcript_id "mmCircRNA-223"; exon_number "2" gene_name "Bai3"; gene_biotype "protein_coding"; oId "ce:circBai3-1070-001"; tissue "ce";
1	ncSplice	exon	25559755	25559865	.	-	.	gene_id "ENSMUSG00000033569"; transcript_id "mmCircRNA-223"; exon_number "3" gene_name "Bai3"; gene_biotype "protein_coding"; oId "ce:circBai3-1070-001"; tissue "ce";
12	ncSplice	gene	69302324	69303962	.	+	.	gene_id "ENSMUSG00000020978"; gene_name "Klhdc2"; gene_source "ncSplice"; gene_biotype "protein_coding";
12	ncSplice	transcript	69302324	69303962	.	+	.	gene_id "ENSMUSG00000020978"; transcript_id "mmCircRNA-224"; gene_name "Klhdc2"; gene_biotype "protein_coding"; transcript_biotype "circRNA"; oId "ce:circKlhdc2-1086-001"; tissue "ce";
12	ncSplice	exon	69302324	69302441	.	+	.	gene_id "ENSMUSG00000020978"; transcript_id "mmCircRNA-224"; exon_number "1" gene_name "Klhdc2"; gene_biotype "protein_coding"; oId "ce:circKlhdc2-1086-001"; tissue "ce";
12	ncSplice	exon	69303534	69303649	.	+	.	gene_id "ENSMUSG00000020978"; transcript_id "mmCircRNA-224"; exon_number "2" gene_name "Klhdc2"; gene_biotype "protein_coding"; oId "ce:circKlhdc2-1086-001"; tissue "ce";
12	ncSplice	exon	69303881	69303962	.	+	.	gene_id "ENSMUSG00000020978"; transcript_id "mmCircRNA-224"; exon_number "3" gene_name "Klhdc2"; gene_biotype "protein_coding"; oId "ce:circKlhdc2-1086-001"; tissue "ce";
12	ncSplice	gene	69632060	69658078	.	-	.	gene_id "ENSMUSG00000034801"; gene_name "Sos2"; gene_source "ncSplice"; gene_biotype "protein_coding";
12	ncSplice	transcript	69632060	69658078	.	-	.	gene_id "ENSMUSG00000034801"; transcript_id "mmCircRNA-225"; gene_name "Sos2"; gene_biotype "protein_coding"; transcript_biotype "circRNA"; oId "ce:circSos2-1090-001"; tissue "ce";
12	ncSplice	exon	69632060	69632170	.	-	.	gene_id "ENSMUSG00000034801"; transcript_id "mmCircRNA-225"; exon_number "1" gene_name "Sos2"; gene_biotype "protein_coding"; oId "ce:circSos2-1090-001"; tissue "ce";
12	ncSplice	exon	69635582	69635725	.	-	.	gene_id "ENSMUSG00000034801"; transcript_id "mmCircRNA-225"; exon_number "2" gene_name "Sos2"; gene_biotype "protein_coding"; oId "ce:circSos2-1090-001"; tissue "ce";
12	ncSplice	exon	69640054	69640260	.	-	.	gene_id "ENSMUSG00000034801"; transcript_id "mmCircRNA-225"; exon_number "3" gene_name "Sos2"; gene_biotype "protein_coding"; oId "ce:circSos2-1090-001"; tissue "ce";
12	ncSplice	exon	69648452	69648616	.	-	.	gene_id "ENSMUSG00000034801"; transcript_id "mmCircRNA-225"; exon_number "4" gene_name "Sos2"; gene_biotype "protein_coding"; oId "ce:circSos2-1090-001"; tissue "ce";
12	ncSplice	exon	69650600	69650731	.	-	.	gene_id "ENSMUSG00000034801"; transcript_id "mmCircRNA-225"; exon_number "5" gene_name "Sos2"; gene_biotype "protein_coding"; oId "ce:circSos2-1090-001"; tissue "ce";
12	ncSplice	exon	69657953	69658078	.	-	.	gene_id "ENSMUSG00000034801"; transcript_id "mmCircRNA-225"; exon_number "6" gene_name "Sos2"; gene_biotype "protein_coding"; oId "ce:circSos2-1090-001"; tissue "ce";
12	ncSplice	gene	73179205	73219142	.	+	.	gene_id "ENSMUSG00000021103"; gene_name "Mnat1"; gene_source "ncSplice"; gene_biotype "protein_coding";
12	ncSplice	transcript	73179205	73219142	.	+	.	gene_id "ENSMUSG00000021103"; transcript_id "mmCircRNA-226"; gene_name "Mnat1"; gene_biotype "protein_coding"; transcript_biotype "circRNA"; oId "ce:circMnat1-1097-001"; tissue "ce";
12	ncSplice	exon	73179205	73179308	.	+	.	gene_id "ENSMUSG00000021103"; transcript_id "mmCircRNA-226"; exon_number "1" gene_name "Mnat1"; gene_biotype "protein_coding"; oId "ce:circMnat1-1097-001"; tissue "ce";
12	ncSplice	exon	73181784	73181924	.	+	.	gene_id "ENSMUSG00000021103"; transcript_id "mmCircRNA-226"; exon_number "2" gene_name "Mnat1"; gene_biotype "protein_coding"; oId "ce:circMnat1-1097-001"; tissue "ce";
12	ncSplice	exon	73188140	73188265	.	+	.	gene_id "ENSMUSG00000021103"; transcript_id "mmCircRNA-226"; exon_number "3" gene_name "Mnat1"; gene_biotype "protein_coding"; oId "ce:circMnat1-1097-001"; tissue "ce";
12	ncSplice	exon	73219021	73219142	.	+	.	gene_id "ENSMUSG00000021103"; transcript_id "mmCircRNA-226"; exon_number "4" gene_name "Mnat1"; gene_biotype "protein_coding"; oId "ce:circMnat1-1097-001"; tissue "ce";
12	ncSplice	gene	77331896	77365359	.	+	.	gene_id "ENSMUSG00000021065"; gene_name "Fut8"; gene_source "ncSplice"; gene_biotype "protein_coding";
12	ncSplice	transcript	77331896	77365359	.	+	.	gene_id "ENSMUSG00000021065"; transcript_id "mmCircRNA-227"; gene_name "Fut8"; gene_biotype "protein_coding"; transcript_biotype "circRNA"; oId "ce:circFut8-1107-001"; tissue "ce";
12	ncSplice	exon	77331896	77332329	.	+	.	gene_id "ENSMUSG00000021065"; transcript_id "mmCircRNA-227"; exon_number "1" gene_name "Fut8"; gene_biotype "protein_coding"; oId "ce:circFut8-1107-001"; tissue "ce";
12	ncSplice	exon	77364969	77365084	.	+	.	gene_id "ENSMUSG00000021065"; transcript_id "mmCircRNA-227"; exon_number "2" gene_name "Fut8"; gene_biotype "protein_coding"; oId "ce:circFut8-1107-001"; tissue "ce";
12	ncSplice	exon	77365197	77365359	.	+	.	gene_id "ENSMUSG00000021065"; transcript_id "mmCircRNA-227"; exon_number "3" gene_name "Fut8"; gene_biotype "protein_coding"; oId "ce:circFut8-1107-001"; tissue "ce";
12	ncSplice	gene	77364969	77365359	.	+	.	gene_id "ENSMUSG00000021065"; gene_name "Fut8"; gene_source "ncSplice"; gene_biotype "protein_coding";
12	ncSplice	transcript	77364969	77365359	.	+	.	gene_id "ENSMUSG00000021065"; transcript_id "mmCircRNA-228"; gene_name "Fut8"; gene_biotype "protein_coding"; transcript_biotype "circRNA"; oId "ce:circFut8-1108-001"; tissue "ce";
12	ncSplice	exon	77364969	77365084	.	+	.	gene_id "ENSMUSG00000021065"; transcript_id "mmCircRNA-228"; exon_number "1" gene_name "Fut8"; gene_biotype "protein_coding"; oId "ce:circFut8-1108-001"; tissue "ce";
12	ncSplice	exon	77365197	77365359	.	+	.	gene_id "ENSMUSG00000021065"; transcript_id "mmCircRNA-228"; exon_number "2" gene_name "Fut8"; gene_biotype "protein_coding"; oId "ce:circFut8-1108-001"; tissue "ce";
12	ncSplice	gene	78590534	78637579	.	+	.	gene_id "ENSMUSG00000047454"; gene_name "Gphn"; gene_source "ncSplice"; gene_biotype "protein_coding";
12	ncSplice	transcript	78590534	78637579	.	+	.	gene_id "ENSMUSG00000047454"; transcript_id "mmCircRNA-229"; gene_name "Gphn"; gene_biotype "protein_coding"; transcript_biotype "circRNA"; oId "ce:circGphn-1118-001|ts:circGphn-809-001"; tissue "ce|ts";
12	ncSplice	exon	78590534	78590671	.	+	.	gene_id "ENSMUSG00000047454"; transcript_id "mmCircRNA-229"; exon_number "1" gene_name "Gphn"; gene_biotype "protein_coding"; oId "ce:circGphn-1118-001|ts:circGphn-809-001"; tissue "ce|ts";
12	ncSplice	exon	78609145	78609237	.	+	.	gene_id "ENSMUSG00000047454"; transcript_id "mmCircRNA-229"; exon_number "2" gene_name "Gphn"; gene_biotype "protein_coding"; oId "ce:circGphn-1118-001|ts:circGphn-809-001"; tissue "ce|ts";
12	ncSplice	exon	78612972	78613027	.	+	.	gene_id "ENSMUSG00000047454"; transcript_id "mmCircRNA-229"; exon_number "3" gene_name "Gphn"; gene_biotype "protein_coding"; oId "ce:circGphn-1118-001|ts:circGphn-809-001"; tissue "ce|ts";
12	ncSplice	exon	78623304	78623423	.	+	.	gene_id "ENSMUSG00000047454"; transcript_id "mmCircRNA-229"; exon_number "4" gene_name "Gphn"; gene_biotype "protein_coding"; oId "ce:circGphn-1118-001|ts:circGphn-809-001"; tissue "ce|ts";
12	ncSplice	exon	78626134	78626192	.	+	.	gene_id "ENSMUSG00000047454"; transcript_id "mmCircRNA-229"; exon_number "5" gene_name "Gphn"; gene_biotype "protein_coding"; oId "ce:circGphn-1118-001|ts:circGphn-809-001"; tissue "ce|ts";
12	ncSplice	exon	78627107	78627260	.	+	.	gene_id "ENSMUSG00000047454"; transcript_id "mmCircRNA-229"; exon_number "6" gene_name "Gphn"; gene_biotype "protein_coding"; oId "ce:circGphn-1118-001|ts:circGphn-809-001"; tissue "ce|ts";
12	ncSplice	exon	78637458	78637579	.	+	.	gene_id "ENSMUSG00000047454"; transcript_id "mmCircRNA-229"; exon_number "7" gene_name "Gphn"; gene_biotype "protein_coding"; oId "ce:circGphn-1118-001|ts:circGphn-809-001"; tissue "ce|ts";
12	ncSplice	gene	84124475	84136637	.	+	.	gene_id "ENSMUSG00000042523"; gene_name "Dnal1"; gene_source "ncSplice"; gene_biotype "protein_coding";
12	ncSplice	transcript	84124475	84136637	.	+	.	gene_id "ENSMUSG00000042523"; transcript_id "mmCircRNA-230"; gene_name "Dnal1"; gene_biotype "protein_coding"; transcript_biotype "circRNA"; oId "ce:circDnal1-1132-002"; tissue "ce";
12	ncSplice	exon	84124475	84124584	.	+	.	gene_id "ENSMUSG00000042523"; transcript_id "mmCircRNA-230"; exon_number "1" gene_name "Dnal1"; gene_biotype "protein_coding"; oId "ce:circDnal1-1132-002"; tissue "ce";
12	ncSplice	exon	84126962	84127017	.	+	.	gene_id "ENSMUSG00000042523"; transcript_id "mmCircRNA-230"; exon_number "2" gene_name "Dnal1"; gene_biotype "protein_coding"; oId "ce:circDnal1-1132-002"; tissue "ce";
12	ncSplice	exon	84131332	84131387	.	+	.	gene_id "ENSMUSG00000042523"; transcript_id "mmCircRNA-230"; exon_number "3" gene_name "Dnal1"; gene_biotype "protein_coding"; oId "ce:circDnal1-1132-002"; tissue "ce";
12	ncSplice	exon	84135567	84135693	.	+	.	gene_id "ENSMUSG00000042523"; transcript_id "mmCircRNA-230"; exon_number "4" gene_name "Dnal1"; gene_biotype "protein_coding"; oId "ce:circDnal1-1132-002"; tissue "ce";
12	ncSplice	exon	84136497	84136637	.	+	.	gene_id "ENSMUSG00000042523"; transcript_id "mmCircRNA-230"; exon_number "5" gene_name "Dnal1"; gene_biotype "protein_coding"; oId "ce:circDnal1-1132-002"; tissue "ce";
12	ncSplice	gene	85049692	85050372	.	+	.	gene_id "ENSMUSG00000021244"; gene_name "Ylpm1"; gene_source "ncSplice"; gene_biotype "protein_coding";
12	ncSplice	transcript	85049692	85050372	.	+	.	gene_id "ENSMUSG00000021244"; transcript_id "mmCircRNA-231"; gene_name "Ylpm1"; gene_biotype "protein_coding"; transcript_biotype "circRNA"; oId "ce:circYlpm1-1143-001"; tissue "ce";
12	ncSplice	exon	85049692	85049868	.	+	.	gene_id "ENSMUSG00000021244"; transcript_id "mmCircRNA-231"; exon_number "1" gene_name "Ylpm1"; gene_biotype "protein_coding"; oId "ce:circYlpm1-1143-001"; tissue "ce";
12	ncSplice	exon	85049944	85050027	.	+	.	gene_id "ENSMUSG00000021244"; transcript_id "mmCircRNA-231"; exon_number "2" gene_name "Ylpm1"; gene_biotype "protein_coding"; oId "ce:circYlpm1-1143-001"; tissue "ce";
12	ncSplice	exon	85050289	85050372	.	+	.	gene_id "ENSMUSG00000021244"; transcript_id "mmCircRNA-231"; exon_number "3" gene_name "Ylpm1"; gene_biotype "protein_coding"; oId "ce:circYlpm1-1143-001"; tissue "ce";
12	ncSplice	gene	85857380	85879475	.	+	.	gene_id "ENSMUSG00000012609"; gene_name "Ttll5"; gene_source "ncSplice"; gene_biotype "protein_coding";
12	ncSplice	transcript	85857380	85879475	.	+	.	gene_id "ENSMUSG00000012609"; transcript_id "mmCircRNA-232"; gene_name "Ttll5"; gene_biotype "protein_coding"; transcript_biotype "circRNA"; oId "ce:circTtll5-1151-001"; tissue "ce";
12	ncSplice	exon	85857380	85857462	.	+	.	gene_id "ENSMUSG00000012609"; transcript_id "mmCircRNA-232"; exon_number "1" gene_name "Ttll5"; gene_biotype "protein_coding"; oId "ce:circTtll5-1151-001"; tissue "ce";
12	ncSplice	exon	85863564	85863633	.	+	.	gene_id "ENSMUSG00000012609"; transcript_id "mmCircRNA-232"; exon_number "2" gene_name "Ttll5"; gene_biotype "protein_coding"; oId "ce:circTtll5-1151-001"; tissue "ce";
12	ncSplice	exon	85864525	85864609	.	+	.	gene_id "ENSMUSG00000012609"; transcript_id "mmCircRNA-232"; exon_number "3" gene_name "Ttll5"; gene_biotype "protein_coding"; oId "ce:circTtll5-1151-001"; tissue "ce";
12	ncSplice	exon	85876491	85876592	.	+	.	gene_id "ENSMUSG00000012609"; transcript_id "mmCircRNA-232"; exon_number "4" gene_name "Ttll5"; gene_biotype "protein_coding"; oId "ce:circTtll5-1151-001"; tissue "ce";
12	ncSplice	exon	85878387	85878478	.	+	.	gene_id "ENSMUSG00000012609"; transcript_id "mmCircRNA-232"; exon_number "5" gene_name "Ttll5"; gene_biotype "protein_coding"; oId "ce:circTtll5-1151-001"; tissue "ce";
12	ncSplice	exon	85879368	85879475	.	+	.	gene_id "ENSMUSG00000012609"; transcript_id "mmCircRNA-232"; exon_number "6" gene_name "Ttll5"; gene_biotype "protein_coding"; oId "ce:circTtll5-1151-001"; tissue "ce";
12	ncSplice	gene	85863564	85879475	.	+	.	gene_id "ENSMUSG00000012609"; gene_name "Ttll5"; gene_source "ncSplice"; gene_biotype "protein_coding";
12	ncSplice	transcript	85863564	85879475	.	+	.	gene_id "ENSMUSG00000012609"; transcript_id "mmCircRNA-233"; gene_name "Ttll5"; gene_biotype "protein_coding"; transcript_biotype "circRNA"; oId "ce:circTtll5-1155-001"; tissue "ce";
12	ncSplice	exon	85863564	85863633	.	+	.	gene_id "ENSMUSG00000012609"; transcript_id "mmCircRNA-233"; exon_number "1" gene_name "Ttll5"; gene_biotype "protein_coding"; oId "ce:circTtll5-1155-001"; tissue "ce";
12	ncSplice	exon	85864525	85864609	.	+	.	gene_id "ENSMUSG00000012609"; transcript_id "mmCircRNA-233"; exon_number "2" gene_name "Ttll5"; gene_biotype "protein_coding"; oId "ce:circTtll5-1155-001"; tissue "ce";
12	ncSplice	exon	85876491	85876592	.	+	.	gene_id "ENSMUSG00000012609"; transcript_id "mmCircRNA-233"; exon_number "3" gene_name "Ttll5"; gene_biotype "protein_coding"; oId "ce:circTtll5-1155-001"; tissue "ce";
12	ncSplice	exon	85878387	85878478	.	+	.	gene_id "ENSMUSG00000012609"; transcript_id "mmCircRNA-233"; exon_number "4" gene_name "Ttll5"; gene_biotype "protein_coding"; oId "ce:circTtll5-1155-001"; tissue "ce";
12	ncSplice	exon	85879368	85879475	.	+	.	gene_id "ENSMUSG00000012609"; transcript_id "mmCircRNA-233"; exon_number "5" gene_name "Ttll5"; gene_biotype "protein_coding"; oId "ce:circTtll5-1155-001"; tissue "ce";
12	ncSplice	gene	85863564	85892210	.	+	.	gene_id "ENSMUSG00000012609"; gene_name "Ttll5"; gene_source "ncSplice"; gene_biotype "protein_coding";
12	ncSplice	transcript	85863564	85892210	.	+	.	gene_id "ENSMUSG00000012609"; transcript_id "mmCircRNA-234"; gene_name "Ttll5"; gene_biotype "protein_coding"; transcript_biotype "circRNA"; oId "ce:circTtll5-1157-003"; tissue "ce";
12	ncSplice	exon	85863564	85863633	.	+	.	gene_id "ENSMUSG00000012609"; transcript_id "mmCircRNA-234"; exon_number "1" gene_name "Ttll5"; gene_biotype "protein_coding"; oId "ce:circTtll5-1157-003"; tissue "ce";
12	ncSplice	exon	85864525	85864609	.	+	.	gene_id "ENSMUSG00000012609"; transcript_id "mmCircRNA-234"; exon_number "2" gene_name "Ttll5"; gene_biotype "protein_coding"; oId "ce:circTtll5-1157-003"; tissue "ce";
12	ncSplice	exon	85876491	85876592	.	+	.	gene_id "ENSMUSG00000012609"; transcript_id "mmCircRNA-234"; exon_number "3" gene_name "Ttll5"; gene_biotype "protein_coding"; oId "ce:circTtll5-1157-003"; tissue "ce";
12	ncSplice	exon	85878387	85878478	.	+	.	gene_id "ENSMUSG00000012609"; transcript_id "mmCircRNA-234"; exon_number "4" gene_name "Ttll5"; gene_biotype "protein_coding"; oId "ce:circTtll5-1157-003"; tissue "ce";
12	ncSplice	exon	85879368	85879475	.	+	.	gene_id "ENSMUSG00000012609"; transcript_id "mmCircRNA-234"; exon_number "5" gene_name "Ttll5"; gene_biotype "protein_coding"; oId "ce:circTtll5-1157-003"; tissue "ce";
12	ncSplice	exon	85891021	85891082	.	+	.	gene_id "ENSMUSG00000012609"; transcript_id "mmCircRNA-234"; exon_number "6" gene_name "Ttll5"; gene_biotype "protein_coding"; oId "ce:circTtll5-1157-003"; tissue "ce";
12	ncSplice	exon	85892116	85892210	.	+	.	gene_id "ENSMUSG00000012609"; transcript_id "mmCircRNA-234"; exon_number "7" gene_name "Ttll5"; gene_biotype "protein_coding"; oId "ce:circTtll5-1157-003"; tissue "ce";
12	ncSplice	gene	86256868	86269061	.	+	.	gene_id "ENSMUSG00000021254"; gene_name "Gpatch2l"; gene_source "ncSplice"; gene_biotype "protein_coding";
12	ncSplice	transcript	86256868	86269061	.	+	.	gene_id "ENSMUSG00000021254"; transcript_id "mmCircRNA-235"; gene_name "Gpatch2l"; gene_biotype "protein_coding"; transcript_biotype "circRNA"; oId "ce:circGpatch2l-1163-001"; tissue "ce";
12	ncSplice	exon	86256868	86256932	.	+	.	gene_id "ENSMUSG00000021254"; transcript_id "mmCircRNA-235"; exon_number "1" gene_name "Gpatch2l"; gene_biotype "protein_coding"; oId "ce:circGpatch2l-1163-001"; tissue "ce";
12	ncSplice	exon	86260577	86260753	.	+	.	gene_id "ENSMUSG00000021254"; transcript_id "mmCircRNA-235"; exon_number "2" gene_name "Gpatch2l"; gene_biotype "protein_coding"; oId "ce:circGpatch2l-1163-001"; tissue "ce";
12	ncSplice	exon	86261616	86261695	.	+	.	gene_id "ENSMUSG00000021254"; transcript_id "mmCircRNA-235"; exon_number "3" gene_name "Gpatch2l"; gene_biotype "protein_coding"; oId "ce:circGpatch2l-1163-001"; tissue "ce";
12	ncSplice	exon	86265182	86265249	.	+	.	gene_id "ENSMUSG00000021254"; transcript_id "mmCircRNA-235"; exon_number "4" gene_name "Gpatch2l"; gene_biotype "protein_coding"; oId "ce:circGpatch2l-1163-001"; tissue "ce";
12	ncSplice	exon	86267144	86267183	.	+	.	gene_id "ENSMUSG00000021254"; transcript_id "mmCircRNA-235"; exon_number "5" gene_name "Gpatch2l"; gene_biotype "protein_coding"; oId "ce:circGpatch2l-1163-001"; tissue "ce";
12	ncSplice	exon	86268976	86269061	.	+	.	gene_id "ENSMUSG00000021254"; transcript_id "mmCircRNA-235"; exon_number "6" gene_name "Gpatch2l"; gene_biotype "protein_coding"; oId "ce:circGpatch2l-1163-001"; tissue "ce";
12	ncSplice	gene	86260577	86269061	.	+	.	gene_id "ENSMUSG00000021254"; gene_name "Gpatch2l"; gene_source "ncSplice"; gene_biotype "protein_coding";
12	ncSplice	transcript	86260577	86269061	.	+	.	gene_id "ENSMUSG00000021254"; transcript_id "mmCircRNA-236"; gene_name "Gpatch2l"; gene_biotype "protein_coding"; transcript_biotype "circRNA"; oId "ce:circGpatch2l-1165-001"; tissue "ce";
12	ncSplice	exon	86260577	86260753	.	+	.	gene_id "ENSMUSG00000021254"; transcript_id "mmCircRNA-236"; exon_number "1" gene_name "Gpatch2l"; gene_biotype "protein_coding"; oId "ce:circGpatch2l-1165-001"; tissue "ce";
12	ncSplice	exon	86261616	86261695	.	+	.	gene_id "ENSMUSG00000021254"; transcript_id "mmCircRNA-236"; exon_number "2" gene_name "Gpatch2l"; gene_biotype "protein_coding"; oId "ce:circGpatch2l-1165-001"; tissue "ce";
12	ncSplice	exon	86265182	86265249	.	+	.	gene_id "ENSMUSG00000021254"; transcript_id "mmCircRNA-236"; exon_number "3" gene_name "Gpatch2l"; gene_biotype "protein_coding"; oId "ce:circGpatch2l-1165-001"; tissue "ce";
12	ncSplice	exon	86267144	86267183	.	+	.	gene_id "ENSMUSG00000021254"; transcript_id "mmCircRNA-236"; exon_number "4" gene_name "Gpatch2l"; gene_biotype "protein_coding"; oId "ce:circGpatch2l-1165-001"; tissue "ce";
12	ncSplice	exon	86268976	86269061	.	+	.	gene_id "ENSMUSG00000021254"; transcript_id "mmCircRNA-236"; exon_number "5" gene_name "Gpatch2l"; gene_biotype "protein_coding"; oId "ce:circGpatch2l-1165-001"; tissue "ce";
12	ncSplice	gene	98489905	98496310	.	-	.	gene_id "ENSMUSG00000033854"; gene_name "Kcnk10"; gene_source "ncSplice"; gene_biotype "protein_coding";
12	ncSplice	transcript	98489905	98496310	.	-	.	gene_id "ENSMUSG00000033854"; transcript_id "mmCircRNA-237"; gene_name "Kcnk10"; gene_biotype "protein_coding"; transcript_biotype "circRNA"; oId "ce:circKcnk10-1181-001"; tissue "ce";
12	ncSplice	exon	98489905	98490065	.	-	.	gene_id "ENSMUSG00000033854"; transcript_id "mmCircRNA-237"; exon_number "1" gene_name "Kcnk10"; gene_biotype "protein_coding"; oId "ce:circKcnk10-1181-001"; tissue "ce";
12	ncSplice	exon	98496193	98496310	.	-	.	gene_id "ENSMUSG00000033854"; transcript_id "mmCircRNA-237"; exon_number "2" gene_name "Kcnk10"; gene_biotype "protein_coding"; oId "ce:circKcnk10-1181-001"; tissue "ce";
12	ncSplice	gene	98489905	98518832	.	-	.	gene_id "ENSMUSG00000033854"; gene_name "Kcnk10"; gene_source "ncSplice"; gene_biotype "protein_coding";
12	ncSplice	transcript	98489905	98518832	.	-	.	gene_id "ENSMUSG00000033854"; transcript_id "mmCircRNA-238"; gene_name "Kcnk10"; gene_biotype "protein_coding"; transcript_biotype "circRNA"; oId "ce:circKcnk10-1182-001"; tissue "ce";
12	ncSplice	exon	98489905	98490065	.	-	.	gene_id "ENSMUSG00000033854"; transcript_id "mmCircRNA-238"; exon_number "1" gene_name "Kcnk10"; gene_biotype "protein_coding"; oId "ce:circKcnk10-1182-001"; tissue "ce";
12	ncSplice	exon	98496193	98496310	.	-	.	gene_id "ENSMUSG00000033854"; transcript_id "mmCircRNA-238"; exon_number "2" gene_name "Kcnk10"; gene_biotype "protein_coding"; oId "ce:circKcnk10-1182-001"; tissue "ce";
12	ncSplice	exon	98518498	98518832	.	-	.	gene_id "ENSMUSG00000033854"; transcript_id "mmCircRNA-238"; exon_number "3" gene_name "Kcnk10"; gene_biotype "protein_coding"; oId "ce:circKcnk10-1182-001"; tissue "ce";
12	ncSplice	gene	98792024	98794619	.	-	.	gene_id "ENSMUSG00000051166"; gene_name "Eml5"; gene_source "ncSplice"; gene_biotype "protein_coding";
12	ncSplice	transcript	98792024	98794619	.	-	.	gene_id "ENSMUSG00000051166"; transcript_id "mmCircRNA-239"; gene_name "Eml5"; gene_biotype "protein_coding"; transcript_biotype "circRNA"; oId "ce:circEml5-1191-001"; tissue "ce";
12	ncSplice	exon	98792024	98792127	.	-	.	gene_id "ENSMUSG00000051166"; transcript_id "mmCircRNA-239"; exon_number "1" gene_name "Eml5"; gene_biotype "protein_coding"; oId "ce:circEml5-1191-001"; tissue "ce";
12	ncSplice	exon	98792516	98792678	.	-	.	gene_id "ENSMUSG00000051166"; transcript_id "mmCircRNA-239"; exon_number "2" gene_name "Eml5"; gene_biotype "protein_coding"; oId "ce:circEml5-1191-001"; tissue "ce";
12	ncSplice	exon	98794114	98794286	.	-	.	gene_id "ENSMUSG00000051166"; transcript_id "mmCircRNA-239"; exon_number "3" gene_name "Eml5"; gene_biotype "protein_coding"; oId "ce:circEml5-1191-001"; tissue "ce";
12	ncSplice	exon	98794431	98794619	.	-	.	gene_id "ENSMUSG00000051166"; transcript_id "mmCircRNA-239"; exon_number "4" gene_name "Eml5"; gene_biotype "protein_coding"; oId "ce:circEml5-1191-001"; tissue "ce";
13	ncSplice	gene	100534963	100541184	.	-	.	gene_id "ENSMUSG00000021638"; gene_name "Ocln"; gene_source "ncSplice"; gene_biotype "protein_coding";
13	ncSplice	transcript	100534963	100541184	.	-	.	gene_id "ENSMUSG00000021638"; transcript_id "mmCircRNA-240"; gene_name "Ocln"; gene_biotype "protein_coding"; transcript_biotype "circRNA"; oId "ce:circOcln-1198-001"; tissue "ce";
13	ncSplice	exon	100534963	100535124	.	-	.	gene_id "ENSMUSG00000021638"; transcript_id "mmCircRNA-240"; exon_number "1" gene_name "Ocln"; gene_biotype "protein_coding"; oId "ce:circOcln-1198-001"; tissue "ce";
13	ncSplice	exon	100539261	100539933	.	-	.	gene_id "ENSMUSG00000021638"; transcript_id "mmCircRNA-240"; exon_number "2" gene_name "Ocln"; gene_biotype "protein_coding"; oId "ce:circOcln-1198-001"; tissue "ce";
13	ncSplice	exon	100541068	100541184	.	-	.	gene_id "ENSMUSG00000021638"; transcript_id "mmCircRNA-240"; exon_number "3" gene_name "Ocln"; gene_biotype "protein_coding"; oId "ce:circOcln-1198-001"; tissue "ce";
13	ncSplice	gene	11680966	11688013	.	-	.	gene_id "ENSMUSG00000021313"; gene_name "Ryr2"; gene_source "ncSplice"; gene_biotype "protein_coding";
13	ncSplice	transcript	11680966	11688013	.	-	.	gene_id "ENSMUSG00000021313"; transcript_id "mmCircRNA-241"; gene_name "Ryr2"; gene_biotype "protein_coding"; transcript_biotype "circRNA"; oId "ce:circRyr2-1215-001"; tissue "ce";
13	ncSplice	exon	11680966	11681087	.	-	.	gene_id "ENSMUSG00000021313"; transcript_id "mmCircRNA-241"; exon_number "1" gene_name "Ryr2"; gene_biotype "protein_coding"; oId "ce:circRyr2-1215-001"; tissue "ce";
13	ncSplice	exon	11684462	11684526	.	-	.	gene_id "ENSMUSG00000021313"; transcript_id "mmCircRNA-241"; exon_number "2" gene_name "Ryr2"; gene_biotype "protein_coding"; oId "ce:circRyr2-1215-001"; tissue "ce";
13	ncSplice	exon	11686943	11687058	.	-	.	gene_id "ENSMUSG00000021313"; transcript_id "mmCircRNA-241"; exon_number "3" gene_name "Ryr2"; gene_biotype "protein_coding"; oId "ce:circRyr2-1215-001"; tissue "ce";
13	ncSplice	exon	11687890	11688013	.	-	.	gene_id "ENSMUSG00000021313"; transcript_id "mmCircRNA-241"; exon_number "4" gene_name "Ryr2"; gene_biotype "protein_coding"; oId "ce:circRyr2-1215-001"; tissue "ce";
13	ncSplice	gene	11759671	11785141	.	-	.	gene_id "ENSMUSG00000021313"; gene_name "Ryr2"; gene_source "ncSplice"; gene_biotype "protein_coding";
13	ncSplice	transcript	11759671	11785141	.	-	.	gene_id "ENSMUSG00000021313"; transcript_id "mmCircRNA-242"; gene_name "Ryr2"; gene_biotype "protein_coding"; transcript_biotype "circRNA"; oId "ce:circRyr2-1220-002"; tissue "ce";
13	ncSplice	exon	11759671	11759845	.	-	.	gene_id "ENSMUSG00000021313"; transcript_id "mmCircRNA-242"; exon_number "1" gene_name "Ryr2"; gene_biotype "protein_coding"; oId "ce:circRyr2-1220-002"; tissue "ce";
13	ncSplice	exon	11761227	11761435	.	-	.	gene_id "ENSMUSG00000021313"; transcript_id "mmCircRNA-242"; exon_number "2" gene_name "Ryr2"; gene_biotype "protein_coding"; oId "ce:circRyr2-1220-002"; tissue "ce";
13	ncSplice	exon	11769852	11769999	.	-	.	gene_id "ENSMUSG00000021313"; transcript_id "mmCircRNA-242"; exon_number "3" gene_name "Ryr2"; gene_biotype "protein_coding"; oId "ce:circRyr2-1220-002"; tissue "ce";
13	ncSplice	exon	11772420	11772579	.	-	.	gene_id "ENSMUSG00000021313"; transcript_id "mmCircRNA-242"; exon_number "4" gene_name "Ryr2"; gene_biotype "protein_coding"; oId "ce:circRyr2-1220-002"; tissue "ce";
13	ncSplice	exon	11779185	11779268	.	-	.	gene_id "ENSMUSG00000021313"; transcript_id "mmCircRNA-242"; exon_number "5" gene_name "Ryr2"; gene_biotype "protein_coding"; oId "ce:circRyr2-1220-002"; tissue "ce";
13	ncSplice	exon	11785038	11785141	.	-	.	gene_id "ENSMUSG00000021313"; transcript_id "mmCircRNA-242"; exon_number "6" gene_name "Ryr2"; gene_biotype "protein_coding"; oId "ce:circRyr2-1220-002"; tissue "ce";
13	ncSplice	gene	11769852	11785141	.	-	.	gene_id "ENSMUSG00000021313"; gene_name "Ryr2"; gene_source "ncSplice"; gene_biotype "protein_coding";
13	ncSplice	transcript	11769852	11785141	.	-	.	gene_id "ENSMUSG00000021313"; transcript_id "mmCircRNA-243"; gene_name "Ryr2"; gene_biotype "protein_coding"; transcript_biotype "circRNA"; oId "ce:circRyr2-1221-002"; tissue "ce";
13	ncSplice	exon	11769852	11769999	.	-	.	gene_id "ENSMUSG00000021313"; transcript_id "mmCircRNA-243"; exon_number "1" gene_name "Ryr2"; gene_biotype "protein_coding"; oId "ce:circRyr2-1221-002"; tissue "ce";
13	ncSplice	exon	11772420	11772579	.	-	.	gene_id "ENSMUSG00000021313"; transcript_id "mmCircRNA-243"; exon_number "2" gene_name "Ryr2"; gene_biotype "protein_coding"; oId "ce:circRyr2-1221-002"; tissue "ce";
13	ncSplice	exon	11779185	11779268	.	-	.	gene_id "ENSMUSG00000021313"; transcript_id "mmCircRNA-243"; exon_number "3" gene_name "Ryr2"; gene_biotype "protein_coding"; oId "ce:circRyr2-1221-002"; tissue "ce";
13	ncSplice	exon	11785038	11785141	.	-	.	gene_id "ENSMUSG00000021313"; transcript_id "mmCircRNA-243"; exon_number "4" gene_name "Ryr2"; gene_biotype "protein_coding"; oId "ce:circRyr2-1221-002"; tissue "ce";
13	ncSplice	gene	14278278	14311790	.	-	.	gene_id "ENSMUSG00000021301"; gene_name "Hecw1"; gene_source "ncSplice"; gene_biotype "protein_coding";
13	ncSplice	transcript	14278278	14311790	.	-	.	gene_id "ENSMUSG00000021301"; transcript_id "mmCircRNA-244"; gene_name "Hecw1"; gene_biotype "protein_coding"; transcript_biotype "circRNA"; oId "ce:circHecw1-1230-001"; tissue "ce";
13	ncSplice	exon	14278278	14278374	.	-	.	gene_id "ENSMUSG00000021301"; transcript_id "mmCircRNA-244"; exon_number "1" gene_name "Hecw1"; gene_biotype "protein_coding"; oId "ce:circHecw1-1230-001"; tissue "ce";
13	ncSplice	exon	14280416	14280521	.	-	.	gene_id "ENSMUSG00000021301"; transcript_id "mmCircRNA-244"; exon_number "2" gene_name "Hecw1"; gene_biotype "protein_coding"; oId "ce:circHecw1-1230-001"; tissue "ce";
13	ncSplice	exon	14285548	14285682	.	-	.	gene_id "ENSMUSG00000021301"; transcript_id "mmCircRNA-244"; exon_number "3" gene_name "Hecw1"; gene_biotype "protein_coding"; oId "ce:circHecw1-1230-001"; tissue "ce";
13	ncSplice	exon	14297270	14297455	.	-	.	gene_id "ENSMUSG00000021301"; transcript_id "mmCircRNA-244"; exon_number "4" gene_name "Hecw1"; gene_biotype "protein_coding"; oId "ce:circHecw1-1230-001"; tissue "ce";
13	ncSplice	exon	14300326	14300447	.	-	.	gene_id "ENSMUSG00000021301"; transcript_id "mmCircRNA-244"; exon_number "5" gene_name "Hecw1"; gene_biotype "protein_coding"; oId "ce:circHecw1-1230-001"; tissue "ce";
13	ncSplice	exon	14305976	14306118	.	-	.	gene_id "ENSMUSG00000021301"; transcript_id "mmCircRNA-244"; exon_number "6" gene_name "Hecw1"; gene_biotype "protein_coding"; oId "ce:circHecw1-1230-001"; tissue "ce";
13	ncSplice	exon	14306783	14306933	.	-	.	gene_id "ENSMUSG00000021301"; transcript_id "mmCircRNA-244"; exon_number "7" gene_name "Hecw1"; gene_biotype "protein_coding"; oId "ce:circHecw1-1230-001"; tissue "ce";
13	ncSplice	exon	14311689	14311790	.	-	.	gene_id "ENSMUSG00000021301"; transcript_id "mmCircRNA-244"; exon_number "8" gene_name "Hecw1"; gene_biotype "protein_coding"; oId "ce:circHecw1-1230-001"; tissue "ce";
13	ncSplice	gene	17763104	17772957	.	-	.	gene_id "ENSMUSG00000041297"; gene_name "Cdk13"; gene_source "ncSplice"; gene_biotype "protein_coding";
13	ncSplice	transcript	17763104	17772957	.	-	.	gene_id "ENSMUSG00000041297"; transcript_id "mmCircRNA-245"; gene_name "Cdk13"; gene_biotype "protein_coding"; transcript_biotype "circRNA"; oId "ce:circCdk13-1236-001|ts:circCdk13-947-002"; tissue "ce|ts";
13	ncSplice	exon	17763104	17763274	.	-	.	gene_id "ENSMUSG00000041297"; transcript_id "mmCircRNA-245"; exon_number "1" gene_name "Cdk13"; gene_biotype "protein_coding"; oId "ce:circCdk13-1236-001|ts:circCdk13-947-002"; tissue "ce|ts";
13	ncSplice	exon	17764954	17765093	.	-	.	gene_id "ENSMUSG00000041297"; transcript_id "mmCircRNA-245"; exon_number "2" gene_name "Cdk13"; gene_biotype "protein_coding"; oId "ce:circCdk13-1236-001|ts:circCdk13-947-002"; tissue "ce|ts";
13	ncSplice	exon	17766436	17766606	.	-	.	gene_id "ENSMUSG00000041297"; transcript_id "mmCircRNA-245"; exon_number "3" gene_name "Cdk13"; gene_biotype "protein_coding"; oId "ce:circCdk13-1236-001|ts:circCdk13-947-002"; tissue "ce|ts";
13	ncSplice	exon	17772301	17772957	.	-	.	gene_id "ENSMUSG00000041297"; transcript_id "mmCircRNA-245"; exon_number "4" gene_name "Cdk13"; gene_biotype "protein_coding"; oId "ce:circCdk13-1236-001|ts:circCdk13-947-002"; tissue "ce|ts";
13	ncSplice	gene	35790101	35816575	.	+	.	gene_id "ENSMUSG00000059288"; gene_name "Cdyl"; gene_source "ncSplice"; gene_biotype "protein_coding";
13	ncSplice	transcript	35790101	35816575	.	+	.	gene_id "ENSMUSG00000059288"; transcript_id "mmCircRNA-246"; gene_name "Cdyl"; gene_biotype "protein_coding"; transcript_biotype "circRNA"; oId "ce:circCdyl-1253-001"; tissue "ce";
13	ncSplice	exon	35790101	35790175	.	+	.	gene_id "ENSMUSG00000059288"; transcript_id "mmCircRNA-246"; exon_number "1" gene_name "Cdyl"; gene_biotype "protein_coding"; oId "ce:circCdyl-1253-001"; tissue "ce";
13	ncSplice	exon	35815909	35816575	.	+	.	gene_id "ENSMUSG00000059288"; transcript_id "mmCircRNA-246"; exon_number "2" gene_name "Cdyl"; gene_biotype "protein_coding"; oId "ce:circCdyl-1253-001"; tissue "ce";
1	ncSplice	gene	34113933	34135256	.	+	.	gene_id "ENSMUSG00000026131"; gene_name "Dst"; gene_source "ncSplice"; gene_biotype "protein_coding";
1	ncSplice	transcript	34113933	34135256	.	+	.	gene_id "ENSMUSG00000026131"; transcript_id "mmCircRNA-247"; gene_name "Dst"; gene_biotype "protein_coding"; transcript_biotype "circRNA"; oId "ce:circDst-1268-001"; tissue "ce";
1	ncSplice	exon	34113933	34114022	.	+	.	gene_id "ENSMUSG00000026131"; transcript_id "mmCircRNA-247"; exon_number "1" gene_name "Dst"; gene_biotype "protein_coding"; oId "ce:circDst-1268-001"; tissue "ce";
1	ncSplice	exon	34116118	34116195	.	+	.	gene_id "ENSMUSG00000026131"; transcript_id "mmCircRNA-247"; exon_number "2" gene_name "Dst"; gene_biotype "protein_coding"; oId "ce:circDst-1268-001"; tissue "ce";
1	ncSplice	exon	34117432	34117524	.	+	.	gene_id "ENSMUSG00000026131"; transcript_id "mmCircRNA-247"; exon_number "3" gene_name "Dst"; gene_biotype "protein_coding"; oId "ce:circDst-1268-001"; tissue "ce";
1	ncSplice	exon	34135090	34135256	.	+	.	gene_id "ENSMUSG00000026131"; transcript_id "mmCircRNA-247"; exon_number "4" gene_name "Dst"; gene_biotype "protein_coding"; oId "ce:circDst-1268-001"; tissue "ce";
13	ncSplice	gene	46761273	46778993	.	-	.	gene_id "ENSMUSG00000021375"; gene_name "Kif13a"; gene_source "ncSplice"; gene_biotype "protein_coding";
13	ncSplice	transcript	46761273	46778993	.	-	.	gene_id "ENSMUSG00000021375"; transcript_id "mmCircRNA-248"; gene_name "Kif13a"; gene_biotype "protein_coding"; transcript_biotype "circRNA"; oId "ce:circKif13a-1280-001"; tissue "ce";
13	ncSplice	exon	46761273	46763453	.	-	.	gene_id "ENSMUSG00000021375"; transcript_id "mmCircRNA-248"; exon_number "1" gene_name "Kif13a"; gene_biotype "protein_coding"; oId "ce:circKif13a-1280-001"; tissue "ce";
13	ncSplice	exon	46764600	46769231	.	-	.	gene_id "ENSMUSG00000021375"; transcript_id "mmCircRNA-248"; exon_number "2" gene_name "Kif13a"; gene_biotype "protein_coding"; oId "ce:circKif13a-1280-001"; tissue "ce";
13	ncSplice	exon	46771217	46771369	.	-	.	gene_id "ENSMUSG00000021375"; transcript_id "mmCircRNA-248"; exon_number "3" gene_name "Kif13a"; gene_biotype "protein_coding"; oId "ce:circKif13a-1280-001"; tissue "ce";
13	ncSplice	exon	46771506	46771598	.	-	.	gene_id "ENSMUSG00000021375"; transcript_id "mmCircRNA-248"; exon_number "4" gene_name "Kif13a"; gene_biotype "protein_coding"; oId "ce:circKif13a-1280-001"; tissue "ce";
13	ncSplice	exon	46772771	46772947	.	-	.	gene_id "ENSMUSG00000021375"; transcript_id "mmCircRNA-248"; exon_number "5" gene_name "Kif13a"; gene_biotype "protein_coding"; oId "ce:circKif13a-1280-001"; tissue "ce";
13	ncSplice	exon	46773584	46773708	.	-	.	gene_id "ENSMUSG00000021375"; transcript_id "mmCircRNA-248"; exon_number "6" gene_name "Kif13a"; gene_biotype "protein_coding"; oId "ce:circKif13a-1280-001"; tissue "ce";
13	ncSplice	exon	46775403	46775458	.	-	.	gene_id "ENSMUSG00000021375"; transcript_id "mmCircRNA-248"; exon_number "7" gene_name "Kif13a"; gene_biotype "protein_coding"; oId "ce:circKif13a-1280-001"; tissue "ce";
13	ncSplice	exon	46777087	46777213	.	-	.	gene_id "ENSMUSG00000021375"; transcript_id "mmCircRNA-248"; exon_number "8" gene_name "Kif13a"; gene_biotype "protein_coding"; oId "ce:circKif13a-1280-001"; tissue "ce";
13	ncSplice	exon	46778894	46778993	.	-	.	gene_id "ENSMUSG00000021375"; transcript_id "mmCircRNA-248"; exon_number "9" gene_name "Kif13a"; gene_biotype "protein_coding"; oId "ce:circKif13a-1280-001"; tissue "ce";
13	ncSplice	gene	55034889	55069807	.	-	.	gene_id "ENSMUSG00000025878"; gene_name "Uimc1"; gene_source "ncSplice"; gene_biotype "protein_coding";
13	ncSplice	transcript	55034889	55069807	.	-	.	gene_id "ENSMUSG00000025878"; transcript_id "mmCircRNA-249"; gene_name "Uimc1"; gene_biotype "protein_coding"; transcript_biotype "circRNA"; oId "ce:circUimc1-1295-001"; tissue "ce";
13	ncSplice	exon	55034889	55035066	.	-	.	gene_id "ENSMUSG00000025878"; transcript_id "mmCircRNA-249"; exon_number "1" gene_name "Uimc1"; gene_biotype "protein_coding"; oId "ce:circUimc1-1295-001"; tissue "ce";
13	ncSplice	exon	55040545	55040623	.	-	.	gene_id "ENSMUSG00000025878"; transcript_id "mmCircRNA-249"; exon_number "2" gene_name "Uimc1"; gene_biotype "protein_coding"; oId "ce:circUimc1-1295-001"; tissue "ce";
13	ncSplice	exon	55050741	55050894	.	-	.	gene_id "ENSMUSG00000025878"; transcript_id "mmCircRNA-249"; exon_number "3" gene_name "Uimc1"; gene_biotype "protein_coding"; oId "ce:circUimc1-1295-001"; tissue "ce";
13	ncSplice	exon	55055975	55056078	.	-	.	gene_id "ENSMUSG00000025878"; transcript_id "mmCircRNA-249"; exon_number "4" gene_name "Uimc1"; gene_biotype "protein_coding"; oId "ce:circUimc1-1295-001"; tissue "ce";
13	ncSplice	exon	55060266	55060342	.	-	.	gene_id "ENSMUSG00000025878"; transcript_id "mmCircRNA-249"; exon_number "5" gene_name "Uimc1"; gene_biotype "protein_coding"; oId "ce:circUimc1-1295-001"; tissue "ce";
13	ncSplice	exon	55069722	55069807	.	-	.	gene_id "ENSMUSG00000025878"; transcript_id "mmCircRNA-249"; exon_number "6" gene_name "Uimc1"; gene_biotype "protein_coding"; oId "ce:circUimc1-1295-001"; tissue "ce";
13	ncSplice	gene	55050741	55069807	.	-	.	gene_id "ENSMUSG00000025878"; gene_name "Uimc1"; gene_source "ncSplice"; gene_biotype "protein_coding";
13	ncSplice	transcript	55050741	55069807	.	-	.	gene_id "ENSMUSG00000025878"; transcript_id "mmCircRNA-250"; gene_name "Uimc1"; gene_biotype "protein_coding"; transcript_biotype "circRNA"; oId "ce:circUimc1-1297-001"; tissue "ce";
13	ncSplice	exon	55050741	55050894	.	-	.	gene_id "ENSMUSG00000025878"; transcript_id "mmCircRNA-250"; exon_number "1" gene_name "Uimc1"; gene_biotype "protein_coding"; oId "ce:circUimc1-1297-001"; tissue "ce";
13	ncSplice	exon	55055975	55056078	.	-	.	gene_id "ENSMUSG00000025878"; transcript_id "mmCircRNA-250"; exon_number "2" gene_name "Uimc1"; gene_biotype "protein_coding"; oId "ce:circUimc1-1297-001"; tissue "ce";
13	ncSplice	exon	55060266	55060342	.	-	.	gene_id "ENSMUSG00000025878"; transcript_id "mmCircRNA-250"; exon_number "3" gene_name "Uimc1"; gene_biotype "protein_coding"; oId "ce:circUimc1-1297-001"; tissue "ce";
13	ncSplice	exon	55069722	55069807	.	-	.	gene_id "ENSMUSG00000025878"; transcript_id "mmCircRNA-250"; exon_number "4" gene_name "Uimc1"; gene_biotype "protein_coding"; oId "ce:circUimc1-1297-001"; tissue "ce";
13	ncSplice	gene	55233895	55248077	.	+	.	gene_id "ENSMUSG00000021488"; gene_name "Nsd1"; gene_source "ncSplice"; gene_biotype "protein_coding";
13	ncSplice	transcript	55233895	55248077	.	+	.	gene_id "ENSMUSG00000021488"; transcript_id "mmCircRNA-251"; gene_name "Nsd1"; gene_biotype "protein_coding"; transcript_biotype "circRNA"; oId "ce:circNsd1-1302-001|ts:circNsd1-1012-002"; tissue "ce|ts";
13	ncSplice	exon	55233895	55234030	.	+	.	gene_id "ENSMUSG00000021488"; transcript_id "mmCircRNA-251"; exon_number "1" gene_name "Nsd1"; gene_biotype "protein_coding"; oId "ce:circNsd1-1302-001|ts:circNsd1-1012-002"; tissue "ce|ts";
13	ncSplice	exon	55238690	55238862	.	+	.	gene_id "ENSMUSG00000021488"; transcript_id "mmCircRNA-251"; exon_number "2" gene_name "Nsd1"; gene_biotype "protein_coding"; oId "ce:circNsd1-1302-001|ts:circNsd1-1012-002"; tissue "ce|ts";
13	ncSplice	exon	55245518	55248077	.	+	.	gene_id "ENSMUSG00000021488"; transcript_id "mmCircRNA-251"; exon_number "3" gene_name "Nsd1"; gene_biotype "protein_coding"; oId "ce:circNsd1-1302-001|ts:circNsd1-1012-002"; tissue "ce|ts";
13	ncSplice	gene	58191722	58199070	.	-	.	gene_id "ENSMUSG00000005312"; gene_name "Ubqln1"; gene_source "ncSplice"; gene_biotype "protein_coding";
13	ncSplice	transcript	58191722	58199070	.	-	.	gene_id "ENSMUSG00000005312"; transcript_id "mmCircRNA-252"; gene_name "Ubqln1"; gene_biotype "protein_coding"; transcript_biotype "circRNA"; oId "ce:circUbqln1-1308-001"; tissue "ce";
13	ncSplice	exon	58191722	58191965	.	-	.	gene_id "ENSMUSG00000005312"; transcript_id "mmCircRNA-252"; exon_number "1" gene_name "Ubqln1"; gene_biotype "protein_coding"; oId "ce:circUbqln1-1308-001"; tissue "ce";
13	ncSplice	exon	58192077	58192235	.	-	.	gene_id "ENSMUSG00000005312"; transcript_id "mmCircRNA-252"; exon_number "2" gene_name "Ubqln1"; gene_biotype "protein_coding"; oId "ce:circUbqln1-1308-001"; tissue "ce";
13	ncSplice	exon	58193252	58193514	.	-	.	gene_id "ENSMUSG00000005312"; transcript_id "mmCircRNA-252"; exon_number "3" gene_name "Ubqln1"; gene_biotype "protein_coding"; oId "ce:circUbqln1-1308-001"; tissue "ce";
13	ncSplice	exon	58196557	58196672	.	-	.	gene_id "ENSMUSG00000005312"; transcript_id "mmCircRNA-252"; exon_number "4" gene_name "Ubqln1"; gene_biotype "protein_coding"; oId "ce:circUbqln1-1308-001"; tissue "ce";
13	ncSplice	exon	58198919	58199070	.	-	.	gene_id "ENSMUSG00000005312"; transcript_id "mmCircRNA-252"; exon_number "5" gene_name "Ubqln1"; gene_biotype "protein_coding"; oId "ce:circUbqln1-1308-001"; tissue "ce";
13	ncSplice	gene	59460469	59482604	.	-	.	gene_id "ENSMUSG00000021557"; gene_name "Agtpbp1"; gene_source "ncSplice"; gene_biotype "protein_coding";
13	ncSplice	transcript	59460469	59482604	.	-	.	gene_id "ENSMUSG00000021557"; transcript_id "mmCircRNA-253"; gene_name "Agtpbp1"; gene_biotype "protein_coding"; transcript_biotype "circRNA"; oId "ce:circAgtpbp1-1314-001|ts:circAgtpbp1-1026-004"; tissue "ce|ts";
13	ncSplice	exon	59460469	59460629	.	-	.	gene_id "ENSMUSG00000021557"; transcript_id "mmCircRNA-253"; exon_number "1" gene_name "Agtpbp1"; gene_biotype "protein_coding"; oId "ce:circAgtpbp1-1314-001|ts:circAgtpbp1-1026-004"; tissue "ce|ts";
13	ncSplice	exon	59461997	59462173	.	-	.	gene_id "ENSMUSG00000021557"; transcript_id "mmCircRNA-253"; exon_number "2" gene_name "Agtpbp1"; gene_biotype "protein_coding"; oId "ce:circAgtpbp1-1314-001|ts:circAgtpbp1-1026-004"; tissue "ce|ts";
13	ncSplice	exon	59465985	59466116	.	-	.	gene_id "ENSMUSG00000021557"; transcript_id "mmCircRNA-253"; exon_number "3" gene_name "Agtpbp1"; gene_biotype "protein_coding"; oId "ce:circAgtpbp1-1314-001|ts:circAgtpbp1-1026-004"; tissue "ce|ts";
13	ncSplice	exon	59473688	59473817	.	-	.	gene_id "ENSMUSG00000021557"; transcript_id "mmCircRNA-253"; exon_number "4" gene_name "Agtpbp1"; gene_biotype "protein_coding"; oId "ce:circAgtpbp1-1314-001|ts:circAgtpbp1-1026-004"; tissue "ce|ts";
13	ncSplice	exon	59474532	59474712	.	-	.	gene_id "ENSMUSG00000021557"; transcript_id "mmCircRNA-253"; exon_number "5" gene_name "Agtpbp1"; gene_biotype "protein_coding"; oId "ce:circAgtpbp1-1314-001|ts:circAgtpbp1-1026-004"; tissue "ce|ts";
13	ncSplice	exon	59475660	59475813	.	-	.	gene_id "ENSMUSG00000021557"; transcript_id "mmCircRNA-253"; exon_number "6" gene_name "Agtpbp1"; gene_biotype "protein_coding"; oId "ce:circAgtpbp1-1314-001|ts:circAgtpbp1-1026-004"; tissue "ce|ts";
13	ncSplice	exon	59476994	59477138	.	-	.	gene_id "ENSMUSG00000021557"; transcript_id "mmCircRNA-253"; exon_number "7" gene_name "Agtpbp1"; gene_biotype "protein_coding"; oId "ce:circAgtpbp1-1314-001|ts:circAgtpbp1-1026-004"; tissue "ce|ts";
13	ncSplice	exon	59482517	59482604	.	-	.	gene_id "ENSMUSG00000021557"; transcript_id "mmCircRNA-253"; exon_number "8" gene_name "Agtpbp1"; gene_biotype "protein_coding"; oId "ce:circAgtpbp1-1314-001|ts:circAgtpbp1-1026-004"; tissue "ce|ts";
13	ncSplice	gene	59495333	59504310	.	-	.	gene_id "ENSMUSG00000021557"; gene_name "Agtpbp1"; gene_source "ncSplice"; gene_biotype "protein_coding";
13	ncSplice	transcript	59495333	59504310	.	-	.	gene_id "ENSMUSG00000021557"; transcript_id "mmCircRNA-254"; gene_name "Agtpbp1"; gene_biotype "protein_coding"; transcript_biotype "circRNA"; oId "ce:circAgtpbp1-1321-001"; tissue "ce";
13	ncSplice	exon	59495333	59495481	.	-	.	gene_id "ENSMUSG00000021557"; transcript_id "mmCircRNA-254"; exon_number "1" gene_name "Agtpbp1"; gene_biotype "protein_coding"; oId "ce:circAgtpbp1-1321-001"; tissue "ce";
13	ncSplice	exon	59495563	59495649	.	-	.	gene_id "ENSMUSG00000021557"; transcript_id "mmCircRNA-254"; exon_number "2" gene_name "Agtpbp1"; gene_biotype "protein_coding"; oId "ce:circAgtpbp1-1321-001"; tissue "ce";
13	ncSplice	exon	59496976	59497059	.	-	.	gene_id "ENSMUSG00000021557"; transcript_id "mmCircRNA-254"; exon_number "3" gene_name "Agtpbp1"; gene_biotype "protein_coding"; oId "ce:circAgtpbp1-1321-001"; tissue "ce";
13	ncSplice	exon	59500014	59500702	.	-	.	gene_id "ENSMUSG00000021557"; transcript_id "mmCircRNA-254"; exon_number "4" gene_name "Agtpbp1"; gene_biotype "protein_coding"; oId "ce:circAgtpbp1-1321-001"; tissue "ce";
13	ncSplice	exon	59504194	59504310	.	-	.	gene_id "ENSMUSG00000021557"; transcript_id "mmCircRNA-254"; exon_number "5" gene_name "Agtpbp1"; gene_biotype "protein_coding"; oId "ce:circAgtpbp1-1321-001"; tissue "ce";
13	ncSplice	gene	59495333	59508056	.	-	.	gene_id "ENSMUSG00000021557"; gene_name "Agtpbp1"; gene_source "ncSplice"; gene_biotype "protein_coding";
13	ncSplice	transcript	59495333	59508056	.	-	.	gene_id "ENSMUSG00000021557"; transcript_id "mmCircRNA-255"; gene_name "Agtpbp1"; gene_biotype "protein_coding"; transcript_biotype "circRNA"; oId "ce:circAgtpbp1-1322-001"; tissue "ce";
13	ncSplice	exon	59495333	59495481	.	-	.	gene_id "ENSMUSG00000021557"; transcript_id "mmCircRNA-255"; exon_number "1" gene_name "Agtpbp1"; gene_biotype "protein_coding"; oId "ce:circAgtpbp1-1322-001"; tissue "ce";
13	ncSplice	exon	59495563	59495649	.	-	.	gene_id "ENSMUSG00000021557"; transcript_id "mmCircRNA-255"; exon_number "2" gene_name "Agtpbp1"; gene_biotype "protein_coding"; oId "ce:circAgtpbp1-1322-001"; tissue "ce";
13	ncSplice	exon	59496976	59497059	.	-	.	gene_id "ENSMUSG00000021557"; transcript_id "mmCircRNA-255"; exon_number "3" gene_name "Agtpbp1"; gene_biotype "protein_coding"; oId "ce:circAgtpbp1-1322-001"; tissue "ce";
13	ncSplice	exon	59500014	59500702	.	-	.	gene_id "ENSMUSG00000021557"; transcript_id "mmCircRNA-255"; exon_number "4" gene_name "Agtpbp1"; gene_biotype "protein_coding"; oId "ce:circAgtpbp1-1322-001"; tissue "ce";
13	ncSplice	exon	59504194	59504310	.	-	.	gene_id "ENSMUSG00000021557"; transcript_id "mmCircRNA-255"; exon_number "5" gene_name "Agtpbp1"; gene_biotype "protein_coding"; oId "ce:circAgtpbp1-1322-001"; tissue "ce";
13	ncSplice	exon	59507959	59508056	.	-	.	gene_id "ENSMUSG00000021557"; transcript_id "mmCircRNA-255"; exon_number "6" gene_name "Agtpbp1"; gene_biotype "protein_coding"; oId "ce:circAgtpbp1-1322-001"; tissue "ce";
13	ncSplice	gene	59495333	59544451	.	-	.	gene_id "ENSMUSG00000021557"; gene_name "Agtpbp1"; gene_source "ncSplice"; gene_biotype "protein_coding";
13	ncSplice	transcript	59495333	59544451	.	-	.	gene_id "ENSMUSG00000021557"; transcript_id "mmCircRNA-256"; gene_name "Agtpbp1"; gene_biotype "protein_coding"; transcript_biotype "circRNA"; oId "ce:circAgtpbp1-1324-002"; tissue "ce";
13	ncSplice	exon	59495333	59495481	.	-	.	gene_id "ENSMUSG00000021557"; transcript_id "mmCircRNA-256"; exon_number "1" gene_name "Agtpbp1"; gene_biotype "protein_coding"; oId "ce:circAgtpbp1-1324-002"; tissue "ce";
13	ncSplice	exon	59495563	59495649	.	-	.	gene_id "ENSMUSG00000021557"; transcript_id "mmCircRNA-256"; exon_number "2" gene_name "Agtpbp1"; gene_biotype "protein_coding"; oId "ce:circAgtpbp1-1324-002"; tissue "ce";
13	ncSplice	exon	59496976	59497059	.	-	.	gene_id "ENSMUSG00000021557"; transcript_id "mmCircRNA-256"; exon_number "3" gene_name "Agtpbp1"; gene_biotype "protein_coding"; oId "ce:circAgtpbp1-1324-002"; tissue "ce";
13	ncSplice	exon	59500014	59500702	.	-	.	gene_id "ENSMUSG00000021557"; transcript_id "mmCircRNA-256"; exon_number "4" gene_name "Agtpbp1"; gene_biotype "protein_coding"; oId "ce:circAgtpbp1-1324-002"; tissue "ce";
13	ncSplice	exon	59504194	59504310	.	-	.	gene_id "ENSMUSG00000021557"; transcript_id "mmCircRNA-256"; exon_number "5" gene_name "Agtpbp1"; gene_biotype "protein_coding"; oId "ce:circAgtpbp1-1324-002"; tissue "ce";
13	ncSplice	exon	59507959	59508056	.	-	.	gene_id "ENSMUSG00000021557"; transcript_id "mmCircRNA-256"; exon_number "6" gene_name "Agtpbp1"; gene_biotype "protein_coding"; oId "ce:circAgtpbp1-1324-002"; tissue "ce";
13	ncSplice	exon	59512324	59512501	.	-	.	gene_id "ENSMUSG00000021557"; transcript_id "mmCircRNA-256"; exon_number "7" gene_name "Agtpbp1"; gene_biotype "protein_coding"; oId "ce:circAgtpbp1-1324-002"; tissue "ce";
13	ncSplice	exon	59514087	59514295	.	-	.	gene_id "ENSMUSG00000021557"; transcript_id "mmCircRNA-256"; exon_number "8" gene_name "Agtpbp1"; gene_biotype "protein_coding"; oId "ce:circAgtpbp1-1324-002"; tissue "ce";
13	ncSplice	exon	59517653	59517690	.	-	.	gene_id "ENSMUSG00000021557"; transcript_id "mmCircRNA-256"; exon_number "9" gene_name "Agtpbp1"; gene_biotype "protein_coding"; oId "ce:circAgtpbp1-1324-002"; tissue "ce";
13	ncSplice	exon	59525146	59525239	.	-	.	gene_id "ENSMUSG00000021557"; transcript_id "mmCircRNA-256"; exon_number "10" gene_name "Agtpbp1"; gene_biotype "protein_coding"; oId "ce:circAgtpbp1-1324-002"; tissue "ce";
13	ncSplice	exon	59528387	59528518	.	-	.	gene_id "ENSMUSG00000021557"; transcript_id "mmCircRNA-256"; exon_number "11" gene_name "Agtpbp1"; gene_biotype "protein_coding"; oId "ce:circAgtpbp1-1324-002"; tissue "ce";
13	ncSplice	exon	59531057	59531203	.	-	.	gene_id "ENSMUSG00000021557"; transcript_id "mmCircRNA-256"; exon_number "12" gene_name "Agtpbp1"; gene_biotype "protein_coding"; oId "ce:circAgtpbp1-1324-002"; tissue "ce";
13	ncSplice	exon	59532013	59532076	.	-	.	gene_id "ENSMUSG00000021557"; transcript_id "mmCircRNA-256"; exon_number "13" gene_name "Agtpbp1"; gene_biotype "protein_coding"; oId "ce:circAgtpbp1-1324-002"; tissue "ce";
13	ncSplice	exon	59533172	59533239	.	-	.	gene_id "ENSMUSG00000021557"; transcript_id "mmCircRNA-256"; exon_number "14" gene_name "Agtpbp1"; gene_biotype "protein_coding"; oId "ce:circAgtpbp1-1324-002"; tissue "ce";
13	ncSplice	exon	59536249	59536373	.	-	.	gene_id "ENSMUSG00000021557"; transcript_id "mmCircRNA-256"; exon_number "15" gene_name "Agtpbp1"; gene_biotype "protein_coding"; oId "ce:circAgtpbp1-1324-002"; tissue "ce";
13	ncSplice	exon	59544387	59544451	.	-	.	gene_id "ENSMUSG00000021557"; transcript_id "mmCircRNA-256"; exon_number "16" gene_name "Agtpbp1"; gene_biotype "protein_coding"; oId "ce:circAgtpbp1-1324-002"; tissue "ce";
13	ncSplice	gene	59512324	59544451	.	-	.	gene_id "ENSMUSG00000021557"; gene_name "Agtpbp1"; gene_source "ncSplice"; gene_biotype "protein_coding";
13	ncSplice	transcript	59512324	59544451	.	-	.	gene_id "ENSMUSG00000021557"; transcript_id "mmCircRNA-257"; gene_name "Agtpbp1"; gene_biotype "protein_coding"; transcript_biotype "circRNA"; oId "ce:circAgtpbp1-1327-008"; tissue "ce";
13	ncSplice	exon	59512324	59512501	.	-	.	gene_id "ENSMUSG00000021557"; transcript_id "mmCircRNA-257"; exon_number "1" gene_name "Agtpbp1"; gene_biotype "protein_coding"; oId "ce:circAgtpbp1-1327-008"; tissue "ce";
13	ncSplice	exon	59514087	59514295	.	-	.	gene_id "ENSMUSG00000021557"; transcript_id "mmCircRNA-257"; exon_number "2" gene_name "Agtpbp1"; gene_biotype "protein_coding"; oId "ce:circAgtpbp1-1327-008"; tissue "ce";
13	ncSplice	exon	59525146	59525239	.	-	.	gene_id "ENSMUSG00000021557"; transcript_id "mmCircRNA-257"; exon_number "3" gene_name "Agtpbp1"; gene_biotype "protein_coding"; oId "ce:circAgtpbp1-1327-008"; tissue "ce";
13	ncSplice	exon	59528387	59528518	.	-	.	gene_id "ENSMUSG00000021557"; transcript_id "mmCircRNA-257"; exon_number "4" gene_name "Agtpbp1"; gene_biotype "protein_coding"; oId "ce:circAgtpbp1-1327-008"; tissue "ce";
13	ncSplice	exon	59531057	59531203	.	-	.	gene_id "ENSMUSG00000021557"; transcript_id "mmCircRNA-257"; exon_number "5" gene_name "Agtpbp1"; gene_biotype "protein_coding"; oId "ce:circAgtpbp1-1327-008"; tissue "ce";
13	ncSplice	exon	59532013	59532076	.	-	.	gene_id "ENSMUSG00000021557"; transcript_id "mmCircRNA-257"; exon_number "6" gene_name "Agtpbp1"; gene_biotype "protein_coding"; oId "ce:circAgtpbp1-1327-008"; tissue "ce";
13	ncSplice	exon	59533172	59533239	.	-	.	gene_id "ENSMUSG00000021557"; transcript_id "mmCircRNA-257"; exon_number "7" gene_name "Agtpbp1"; gene_biotype "protein_coding"; oId "ce:circAgtpbp1-1327-008"; tissue "ce";
13	ncSplice	exon	59536249	59536373	.	-	.	gene_id "ENSMUSG00000021557"; transcript_id "mmCircRNA-257"; exon_number "8" gene_name "Agtpbp1"; gene_biotype "protein_coding"; oId "ce:circAgtpbp1-1327-008"; tissue "ce";
13	ncSplice	exon	59544387	59544451	.	-	.	gene_id "ENSMUSG00000021557"; transcript_id "mmCircRNA-257"; exon_number "9" gene_name "Agtpbp1"; gene_biotype "protein_coding"; oId "ce:circAgtpbp1-1327-008"; tissue "ce";
13	ncSplice	gene	59525146	59544451	.	-	.	gene_id "ENSMUSG00000021557"; gene_name "Agtpbp1"; gene_source "ncSplice"; gene_biotype "protein_coding";
13	ncSplice	transcript	59525146	59544451	.	-	.	gene_id "ENSMUSG00000021557"; transcript_id "mmCircRNA-258"; gene_name "Agtpbp1"; gene_biotype "protein_coding"; transcript_biotype "circRNA"; oId "ce:circAgtpbp1-1328-002"; tissue "ce";
13	ncSplice	exon	59525146	59525239	.	-	.	gene_id "ENSMUSG00000021557"; transcript_id "mmCircRNA-258"; exon_number "1" gene_name "Agtpbp1"; gene_biotype "protein_coding"; oId "ce:circAgtpbp1-1328-002"; tissue "ce";
13	ncSplice	exon	59528387	59528518	.	-	.	gene_id "ENSMUSG00000021557"; transcript_id "mmCircRNA-258"; exon_number "2" gene_name "Agtpbp1"; gene_biotype "protein_coding"; oId "ce:circAgtpbp1-1328-002"; tissue "ce";
13	ncSplice	exon	59531057	59531203	.	-	.	gene_id "ENSMUSG00000021557"; transcript_id "mmCircRNA-258"; exon_number "3" gene_name "Agtpbp1"; gene_biotype "protein_coding"; oId "ce:circAgtpbp1-1328-002"; tissue "ce";
13	ncSplice	exon	59532013	59532076	.	-	.	gene_id "ENSMUSG00000021557"; transcript_id "mmCircRNA-258"; exon_number "4" gene_name "Agtpbp1"; gene_biotype "protein_coding"; oId "ce:circAgtpbp1-1328-002"; tissue "ce";
13	ncSplice	exon	59533172	59533239	.	-	.	gene_id "ENSMUSG00000021557"; transcript_id "mmCircRNA-258"; exon_number "5" gene_name "Agtpbp1"; gene_biotype "protein_coding"; oId "ce:circAgtpbp1-1328-002"; tissue "ce";
13	ncSplice	exon	59536249	59536373	.	-	.	gene_id "ENSMUSG00000021557"; transcript_id "mmCircRNA-258"; exon_number "6" gene_name "Agtpbp1"; gene_biotype "protein_coding"; oId "ce:circAgtpbp1-1328-002"; tissue "ce";
13	ncSplice	exon	59544387	59544451	.	-	.	gene_id "ENSMUSG00000021557"; transcript_id "mmCircRNA-258"; exon_number "7" gene_name "Agtpbp1"; gene_biotype "protein_coding"; oId "ce:circAgtpbp1-1328-002"; tissue "ce";
1	ncSplice	gene	36182470	36197635	.	-	.	gene_id "ENSMUSG00000037470"; gene_name "Uggt1"; gene_source "ncSplice"; gene_biotype "protein_coding";
1	ncSplice	transcript	36182470	36197635	.	-	.	gene_id "ENSMUSG00000037470"; transcript_id "mmCircRNA-259"; gene_name "Uggt1"; gene_biotype "protein_coding"; transcript_biotype "circRNA"; oId "ce:circUggt1-1330-001"; tissue "ce";
1	ncSplice	exon	36182470	36182634	.	-	.	gene_id "ENSMUSG00000037470"; transcript_id "mmCircRNA-259"; exon_number "1" gene_name "Uggt1"; gene_biotype "protein_coding"; oId "ce:circUggt1-1330-001"; tissue "ce";
1	ncSplice	exon	36184356	36184487	.	-	.	gene_id "ENSMUSG00000037470"; transcript_id "mmCircRNA-259"; exon_number "2" gene_name "Uggt1"; gene_biotype "protein_coding"; oId "ce:circUggt1-1330-001"; tissue "ce";
1	ncSplice	exon	36185833	36185968	.	-	.	gene_id "ENSMUSG00000037470"; transcript_id "mmCircRNA-259"; exon_number "3" gene_name "Uggt1"; gene_biotype "protein_coding"; oId "ce:circUggt1-1330-001"; tissue "ce";
1	ncSplice	exon	36191529	36191614	.	-	.	gene_id "ENSMUSG00000037470"; transcript_id "mmCircRNA-259"; exon_number "4" gene_name "Uggt1"; gene_biotype "protein_coding"; oId "ce:circUggt1-1330-001"; tissue "ce";
1	ncSplice	exon	36192386	36192505	.	-	.	gene_id "ENSMUSG00000037470"; transcript_id "mmCircRNA-259"; exon_number "5" gene_name "Uggt1"; gene_biotype "protein_coding"; oId "ce:circUggt1-1330-001"; tissue "ce";
1	ncSplice	exon	36195850	36196000	.	-	.	gene_id "ENSMUSG00000037470"; transcript_id "mmCircRNA-259"; exon_number "6" gene_name "Uggt1"; gene_biotype "protein_coding"; oId "ce:circUggt1-1330-001"; tissue "ce";
1	ncSplice	exon	36197544	36197635	.	-	.	gene_id "ENSMUSG00000037470"; transcript_id "mmCircRNA-259"; exon_number "7" gene_name "Uggt1"; gene_biotype "protein_coding"; oId "ce:circUggt1-1330-001"; tissue "ce";
13	ncSplice	gene	63061035	63068285	.	+	.	gene_id "ENSMUSG00000021458"; gene_name "2010111I01Rik"; gene_source "ncSplice"; gene_biotype "protein_coding";
13	ncSplice	transcript	63061035	63068285	.	+	.	gene_id "ENSMUSG00000021458"; transcript_id "mmCircRNA-260"; gene_name "2010111I01Rik"; gene_biotype "protein_coding"; transcript_biotype "circRNA"; oId "ce:circ2010111I01Rik-1334-001|ts:circ2010111I01Rik-1036-001"; tissue "ce|ts";
13	ncSplice	exon	63061035	63061194	.	+	.	gene_id "ENSMUSG00000021458"; transcript_id "mmCircRNA-260"; exon_number "1" gene_name "2010111I01Rik"; gene_biotype "protein_coding"; oId "ce:circ2010111I01Rik-1334-001|ts:circ2010111I01Rik-1036-001"; tissue "ce|ts";
13	ncSplice	exon	63068040	63068285	.	+	.	gene_id "ENSMUSG00000021458"; transcript_id "mmCircRNA-260"; exon_number "2" gene_name "2010111I01Rik"; gene_biotype "protein_coding"; oId "ce:circ2010111I01Rik-1334-001|ts:circ2010111I01Rik-1036-001"; tissue "ce|ts";
13	ncSplice	gene	64209107	64225648	.	-	.	gene_id "ENSMUSG00000033102"; gene_name "Cdc14b"; gene_source "ncSplice"; gene_biotype "protein_coding";
13	ncSplice	transcript	64209107	64225648	.	-	.	gene_id "ENSMUSG00000033102"; transcript_id "mmCircRNA-261"; gene_name "Cdc14b"; gene_biotype "protein_coding"; transcript_biotype "circRNA"; oId "ce:circCdc14b-1348-001"; tissue "ce";
13	ncSplice	exon	64209107	64209204	.	-	.	gene_id "ENSMUSG00000033102"; transcript_id "mmCircRNA-261"; exon_number "1" gene_name "Cdc14b"; gene_biotype "protein_coding"; oId "ce:circCdc14b-1348-001"; tissue "ce";
13	ncSplice	exon	64209926	64210085	.	-	.	gene_id "ENSMUSG00000033102"; transcript_id "mmCircRNA-261"; exon_number "2" gene_name "Cdc14b"; gene_biotype "protein_coding"; oId "ce:circCdc14b-1348-001"; tissue "ce";
13	ncSplice	exon	64210195	64210333	.	-	.	gene_id "ENSMUSG00000033102"; transcript_id "mmCircRNA-261"; exon_number "3" gene_name "Cdc14b"; gene_biotype "protein_coding"; oId "ce:circCdc14b-1348-001"; tissue "ce";
13	ncSplice	exon	64215500	64215730	.	-	.	gene_id "ENSMUSG00000033102"; transcript_id "mmCircRNA-261"; exon_number "4" gene_name "Cdc14b"; gene_biotype "protein_coding"; oId "ce:circCdc14b-1348-001"; tissue "ce";
13	ncSplice	exon	64216212	64216299	.	-	.	gene_id "ENSMUSG00000033102"; transcript_id "mmCircRNA-261"; exon_number "5" gene_name "Cdc14b"; gene_biotype "protein_coding"; oId "ce:circCdc14b-1348-001"; tissue "ce";
13	ncSplice	exon	64219886	64219948	.	-	.	gene_id "ENSMUSG00000033102"; transcript_id "mmCircRNA-261"; exon_number "6" gene_name "Cdc14b"; gene_biotype "protein_coding"; oId "ce:circCdc14b-1348-001"; tissue "ce";
13	ncSplice	exon	64220680	64220746	.	-	.	gene_id "ENSMUSG00000033102"; transcript_id "mmCircRNA-261"; exon_number "7" gene_name "Cdc14b"; gene_biotype "protein_coding"; oId "ce:circCdc14b-1348-001"; tissue "ce";
13	ncSplice	exon	64225572	64225648	.	-	.	gene_id "ENSMUSG00000033102"; transcript_id "mmCircRNA-261"; exon_number "8" gene_name "Cdc14b"; gene_biotype "protein_coding"; oId "ce:circCdc14b-1348-001"; tissue "ce";
13	ncSplice	gene	64243634	64247318	.	-	.	gene_id "ENSMUSG00000033102"; gene_name "Cdc14b"; gene_source "ncSplice"; gene_biotype "protein_coding";
13	ncSplice	transcript	64243634	64247318	.	-	.	gene_id "ENSMUSG00000033102"; transcript_id "mmCircRNA-262"; gene_name "Cdc14b"; gene_biotype "protein_coding"; transcript_biotype "circRNA"; oId "ce:circCdc14b-1351-001"; tissue "ce";
13	ncSplice	exon	64243634	64243726	.	-	.	gene_id "ENSMUSG00000033102"; transcript_id "mmCircRNA-262"; exon_number "1" gene_name "Cdc14b"; gene_biotype "protein_coding"; oId "ce:circCdc14b-1351-001"; tissue "ce";
13	ncSplice	exon	64246525	64246600	.	-	.	gene_id "ENSMUSG00000033102"; transcript_id "mmCircRNA-262"; exon_number "2" gene_name "Cdc14b"; gene_biotype "protein_coding"; oId "ce:circCdc14b-1351-001"; tissue "ce";
13	ncSplice	exon	64247228	64247318	.	-	.	gene_id "ENSMUSG00000033102"; transcript_id "mmCircRNA-262"; exon_number "3" gene_name "Cdc14b"; gene_biotype "protein_coding"; oId "ce:circCdc14b-1351-001"; tissue "ce";
13	ncSplice	gene	64243634	64248466	.	-	.	gene_id "ENSMUSG00000033102"; gene_name "Cdc14b"; gene_source "ncSplice"; gene_biotype "protein_coding";
13	ncSplice	transcript	64243634	64248466	.	-	.	gene_id "ENSMUSG00000033102"; transcript_id "mmCircRNA-263"; gene_name "Cdc14b"; gene_biotype "protein_coding"; transcript_biotype "circRNA"; oId "ce:circCdc14b-1352-001"; tissue "ce";
13	ncSplice	exon	64243634	64243726	.	-	.	gene_id "ENSMUSG00000033102"; transcript_id "mmCircRNA-263"; exon_number "1" gene_name "Cdc14b"; gene_biotype "protein_coding"; oId "ce:circCdc14b-1352-001"; tissue "ce";
13	ncSplice	exon	64246525	64246600	.	-	.	gene_id "ENSMUSG00000033102"; transcript_id "mmCircRNA-263"; exon_number "2" gene_name "Cdc14b"; gene_biotype "protein_coding"; oId "ce:circCdc14b-1352-001"; tissue "ce";
13	ncSplice	exon	64247228	64247318	.	-	.	gene_id "ENSMUSG00000033102"; transcript_id "mmCircRNA-263"; exon_number "3" gene_name "Cdc14b"; gene_biotype "protein_coding"; oId "ce:circCdc14b-1352-001"; tissue "ce";
13	ncSplice	exon	64248405	64248466	.	-	.	gene_id "ENSMUSG00000033102"; transcript_id "mmCircRNA-263"; exon_number "4" gene_name "Cdc14b"; gene_biotype "protein_coding"; oId "ce:circCdc14b-1352-001"; tissue "ce";
13	ncSplice	gene	64243634	64248499	.	-	.	gene_id "ENSMUSG00000033102"; gene_name "Cdc14b"; gene_source "ncSplice"; gene_biotype "protein_coding";
13	ncSplice	transcript	64243634	64248499	.	-	.	gene_id "ENSMUSG00000033102"; transcript_id "mmCircRNA-264"; gene_name "Cdc14b"; gene_biotype "protein_coding"; transcript_biotype "circRNA"; oId "ce:circCdc14b-1353-001"; tissue "ce";
13	ncSplice	exon	64243634	64243726	.	-	.	gene_id "ENSMUSG00000033102"; transcript_id "mmCircRNA-264"; exon_number "1" gene_name "Cdc14b"; gene_biotype "protein_coding"; oId "ce:circCdc14b-1353-001"; tissue "ce";
13	ncSplice	exon	64246525	64246600	.	-	.	gene_id "ENSMUSG00000033102"; transcript_id "mmCircRNA-264"; exon_number "2" gene_name "Cdc14b"; gene_biotype "protein_coding"; oId "ce:circCdc14b-1353-001"; tissue "ce";
13	ncSplice	exon	64247228	64247318	.	-	.	gene_id "ENSMUSG00000033102"; transcript_id "mmCircRNA-264"; exon_number "3" gene_name "Cdc14b"; gene_biotype "protein_coding"; oId "ce:circCdc14b-1353-001"; tissue "ce";
13	ncSplice	exon	64248405	64248499	.	-	.	gene_id "ENSMUSG00000033102"; transcript_id "mmCircRNA-264"; exon_number "4" gene_name "Cdc14b"; gene_biotype "protein_coding"; oId "ce:circCdc14b-1353-001"; tissue "ce";
13	ncSplice	gene	69510620	69515903	.	-	.	gene_id "ENSMUSG00000034575"; gene_name "Papd7"; gene_source "ncSplice"; gene_biotype "protein_coding";
13	ncSplice	transcript	69510620	69515903	.	-	.	gene_id "ENSMUSG00000034575"; transcript_id "mmCircRNA-265"; gene_name "Papd7"; gene_biotype "protein_coding"; transcript_biotype "circRNA"; oId "ce:circPapd7-1358-001"; tissue "ce";
13	ncSplice	exon	69510620	69510727	.	-	.	gene_id "ENSMUSG00000034575"; transcript_id "mmCircRNA-265"; exon_number "1" gene_name "Papd7"; gene_biotype "protein_coding"; oId "ce:circPapd7-1358-001"; tissue "ce";
13	ncSplice	exon	69512890	69513010	.	-	.	gene_id "ENSMUSG00000034575"; transcript_id "mmCircRNA-265"; exon_number "2" gene_name "Papd7"; gene_biotype "protein_coding"; oId "ce:circPapd7-1358-001"; tissue "ce";
13	ncSplice	exon	69514965	69515011	.	-	.	gene_id "ENSMUSG00000034575"; transcript_id "mmCircRNA-265"; exon_number "3" gene_name "Papd7"; gene_biotype "protein_coding"; oId "ce:circPapd7-1358-001"; tissue "ce";
13	ncSplice	exon	69515780	69515903	.	-	.	gene_id "ENSMUSG00000034575"; transcript_id "mmCircRNA-265"; exon_number "4" gene_name "Papd7"; gene_biotype "protein_coding"; oId "ce:circPapd7-1358-001"; tissue "ce";
13	ncSplice	gene	69512890	69515903	.	-	.	gene_id "ENSMUSG00000034575"; gene_name "Papd7"; gene_source "ncSplice"; gene_biotype "protein_coding";
13	ncSplice	transcript	69512890	69515903	.	-	.	gene_id "ENSMUSG00000034575"; transcript_id "mmCircRNA-266"; gene_name "Papd7"; gene_biotype "protein_coding"; transcript_biotype "circRNA"; oId "ce:circPapd7-1359-001"; tissue "ce";
13	ncSplice	exon	69512890	69513010	.	-	.	gene_id "ENSMUSG00000034575"; transcript_id "mmCircRNA-266"; exon_number "1" gene_name "Papd7"; gene_biotype "protein_coding"; oId "ce:circPapd7-1359-001"; tissue "ce";
13	ncSplice	exon	69514965	69515011	.	-	.	gene_id "ENSMUSG00000034575"; transcript_id "mmCircRNA-266"; exon_number "2" gene_name "Papd7"; gene_biotype "protein_coding"; oId "ce:circPapd7-1359-001"; tissue "ce";
13	ncSplice	exon	69515780	69515903	.	-	.	gene_id "ENSMUSG00000034575"; transcript_id "mmCircRNA-266"; exon_number "3" gene_name "Papd7"; gene_biotype "protein_coding"; oId "ce:circPapd7-1359-001"; tissue "ce";
1	ncSplice	gene	37490260	37498740	.	-	.	gene_id "ENSMUSG00000026110"; gene_name "Mgat4a"; gene_source "ncSplice"; gene_biotype "protein_coding";
1	ncSplice	transcript	37490260	37498740	.	-	.	gene_id "ENSMUSG00000026110"; transcript_id "mmCircRNA-267"; gene_name "Mgat4a"; gene_biotype "protein_coding"; transcript_biotype "circRNA"; oId "ce:circMgat4a-1362-001"; tissue "ce";
1	ncSplice	exon	37490260	37490393	.	-	.	gene_id "ENSMUSG00000026110"; transcript_id "mmCircRNA-267"; exon_number "1" gene_name "Mgat4a"; gene_biotype "protein_coding"; oId "ce:circMgat4a-1362-001"; tissue "ce";
1	ncSplice	exon	37495873	37496013	.	-	.	gene_id "ENSMUSG00000026110"; transcript_id "mmCircRNA-267"; exon_number "2" gene_name "Mgat4a"; gene_biotype "protein_coding"; oId "ce:circMgat4a-1362-001"; tissue "ce";
1	ncSplice	exon	37498600	37498740	.	-	.	gene_id "ENSMUSG00000026110"; transcript_id "mmCircRNA-267"; exon_number "3" gene_name "Mgat4a"; gene_biotype "protein_coding"; oId "ce:circMgat4a-1362-001"; tissue "ce";
1	ncSplice	gene	38053616	38085652	.	-	.	gene_id "ENSMUSG00000026082"; gene_name "Rev1"; gene_source "ncSplice"; gene_biotype "protein_coding";
1	ncSplice	transcript	38053616	38085652	.	-	.	gene_id "ENSMUSG00000026082"; transcript_id "mmCircRNA-268"; gene_name "Rev1"; gene_biotype "protein_coding"; transcript_biotype "circRNA"; oId "ce:circRev1-1379-001|ts:circRev1-2616-016"; tissue "ce|ts";
1	ncSplice	exon	38053616	38053718	.	-	.	gene_id "ENSMUSG00000026082"; transcript_id "mmCircRNA-268"; exon_number "1" gene_name "Rev1"; gene_biotype "protein_coding"; oId "ce:circRev1-1379-001|ts:circRev1-2616-016"; tissue "ce|ts";
1	ncSplice	exon	38053840	38053996	.	-	.	gene_id "ENSMUSG00000026082"; transcript_id "mmCircRNA-268"; exon_number "2" gene_name "Rev1"; gene_biotype "protein_coding"; oId "ce:circRev1-1379-001|ts:circRev1-2616-016"; tissue "ce|ts";
1	ncSplice	exon	38054084	38054295	.	-	.	gene_id "ENSMUSG00000026082"; transcript_id "mmCircRNA-268"; exon_number "3" gene_name "Rev1"; gene_biotype "protein_coding"; oId "ce:circRev1-1379-001|ts:circRev1-2616-016"; tissue "ce|ts";
1	ncSplice	exon	38054745	38054865	.	-	.	gene_id "ENSMUSG00000026082"; transcript_id "mmCircRNA-268"; exon_number "4" gene_name "Rev1"; gene_biotype "protein_coding"; oId "ce:circRev1-1379-001|ts:circRev1-2616-016"; tissue "ce|ts";
1	ncSplice	exon	38055291	38055524	.	-	.	gene_id "ENSMUSG00000026082"; transcript_id "mmCircRNA-268"; exon_number "5" gene_name "Rev1"; gene_biotype "protein_coding"; oId "ce:circRev1-1379-001|ts:circRev1-2616-016"; tissue "ce|ts";
1	ncSplice	exon	38056264	38056466	.	-	.	gene_id "ENSMUSG00000026082"; transcript_id "mmCircRNA-268"; exon_number "6" gene_name "Rev1"; gene_biotype "protein_coding"; oId "ce:circRev1-1379-001|ts:circRev1-2616-016"; tissue "ce|ts";
1	ncSplice	exon	38056717	38056882	.	-	.	gene_id "ENSMUSG00000026082"; transcript_id "mmCircRNA-268"; exon_number "7" gene_name "Rev1"; gene_biotype "protein_coding"; oId "ce:circRev1-1379-001|ts:circRev1-2616-016"; tissue "ce|ts";
1	ncSplice	exon	38057674	38057776	.	-	.	gene_id "ENSMUSG00000026082"; transcript_id "mmCircRNA-268"; exon_number "8" gene_name "Rev1"; gene_biotype "protein_coding"; oId "ce:circRev1-1379-001|ts:circRev1-2616-016"; tissue "ce|ts";
1	ncSplice	exon	38059122	38059294	.	-	.	gene_id "ENSMUSG00000026082"; transcript_id "mmCircRNA-268"; exon_number "9" gene_name "Rev1"; gene_biotype "protein_coding"; oId "ce:circRev1-1379-001|ts:circRev1-2616-016"; tissue "ce|ts";
1	ncSplice	exon	38063115	38063335	.	-	.	gene_id "ENSMUSG00000026082"; transcript_id "mmCircRNA-268"; exon_number "10" gene_name "Rev1"; gene_biotype "protein_coding"; oId "ce:circRev1-1379-001|ts:circRev1-2616-016"; tissue "ce|ts";
1	ncSplice	exon	38067500	38067619	.	-	.	gene_id "ENSMUSG00000026082"; transcript_id "mmCircRNA-268"; exon_number "11" gene_name "Rev1"; gene_biotype "protein_coding"; oId "ce:circRev1-1379-001|ts:circRev1-2616-016"; tissue "ce|ts";
1	ncSplice	exon	38071343	38071497	.	-	.	gene_id "ENSMUSG00000026082"; transcript_id "mmCircRNA-268"; exon_number "12" gene_name "Rev1"; gene_biotype "protein_coding"; oId "ce:circRev1-1379-001|ts:circRev1-2616-016"; tissue "ce|ts";
1	ncSplice	exon	38074315	38074443	.	-	.	gene_id "ENSMUSG00000026082"; transcript_id "mmCircRNA-268"; exon_number "13" gene_name "Rev1"; gene_biotype "protein_coding"; oId "ce:circRev1-1379-001|ts:circRev1-2616-016"; tissue "ce|ts";
1	ncSplice	exon	38079290	38079398	.	-	.	gene_id "ENSMUSG00000026082"; transcript_id "mmCircRNA-268"; exon_number "14" gene_name "Rev1"; gene_biotype "protein_coding"; oId "ce:circRev1-1379-001|ts:circRev1-2616-016"; tissue "ce|ts";
1	ncSplice	exon	38083704	38083820	.	-	.	gene_id "ENSMUSG00000026082"; transcript_id "mmCircRNA-268"; exon_number "15" gene_name "Rev1"; gene_biotype "protein_coding"; oId "ce:circRev1-1379-001|ts:circRev1-2616-016"; tissue "ce|ts";
1	ncSplice	exon	38085545	38085652	.	-	.	gene_id "ENSMUSG00000026082"; transcript_id "mmCircRNA-268"; exon_number "16" gene_name "Rev1"; gene_biotype "protein_coding"; oId "ce:circRev1-1379-001|ts:circRev1-2616-016"; tissue "ce|ts";
1	ncSplice	gene	38107568	38108467	.	-	.	gene_id "ENSMUSG00000026082"; gene_name "Rev1"; gene_source "ncSplice"; gene_biotype "protein_coding";
1	ncSplice	transcript	38107568	38108467	.	-	.	gene_id "ENSMUSG00000026082"; transcript_id "mmCircRNA-269"; gene_name "Rev1"; gene_biotype "protein_coding"; transcript_biotype "circRNA"; oId "ce:circRev1-1382-001"; tissue "ce";
1	ncSplice	exon	38107568	38107694	.	-	.	gene_id "ENSMUSG00000026082"; transcript_id "mmCircRNA-269"; exon_number "1" gene_name "Rev1"; gene_biotype "protein_coding"; oId "ce:circRev1-1382-001"; tissue "ce";
1	ncSplice	exon	38108404	38108467	.	-	.	gene_id "ENSMUSG00000026082"; transcript_id "mmCircRNA-269"; exon_number "2" gene_name "Rev1"; gene_biotype "protein_coding"; oId "ce:circRev1-1382-001"; tissue "ce";
13	ncSplice	gene	84251230	84260240	.	+	.	gene_id "ENSMUSG00000035762"; gene_name "Tmem161b"; gene_source "ncSplice"; gene_biotype "protein_coding";
13	ncSplice	transcript	84251230	84260240	.	+	.	gene_id "ENSMUSG00000035762"; transcript_id "mmCircRNA-270"; gene_name "Tmem161b"; gene_biotype "protein_coding"; transcript_biotype "circRNA"; oId "ce:circTmem161b-1383-001"; tissue "ce";
13	ncSplice	exon	84251230	84251333	.	+	.	gene_id "ENSMUSG00000035762"; transcript_id "mmCircRNA-270"; exon_number "1" gene_name "Tmem161b"; gene_biotype "protein_coding"; oId "ce:circTmem161b-1383-001"; tissue "ce";
13	ncSplice	exon	84257761	84257844	.	+	.	gene_id "ENSMUSG00000035762"; transcript_id "mmCircRNA-270"; exon_number "2" gene_name "Tmem161b"; gene_biotype "protein_coding"; oId "ce:circTmem161b-1383-001"; tissue "ce";
13	ncSplice	exon	84260143	84260240	.	+	.	gene_id "ENSMUSG00000035762"; transcript_id "mmCircRNA-270"; exon_number "3" gene_name "Tmem161b"; gene_biotype "protein_coding"; oId "ce:circTmem161b-1383-001"; tissue "ce";
1	ncSplice	gene	38534906	38539001	.	-	.	gene_id "ENSMUSG00000037138"; gene_name "Aff3"; gene_source "ncSplice"; gene_biotype "protein_coding";
1	ncSplice	transcript	38534906	38539001	.	-	.	gene_id "ENSMUSG00000037138"; transcript_id "mmCircRNA-271"; gene_name "Aff3"; gene_biotype "protein_coding"; transcript_biotype "circRNA"; oId "ce:circAff3-1385-001"; tissue "ce";
1	ncSplice	exon	38534906	38535291	.	-	.	gene_id "ENSMUSG00000037138"; transcript_id "mmCircRNA-271"; exon_number "1" gene_name "Aff3"; gene_biotype "protein_coding"; oId "ce:circAff3-1385-001"; tissue "ce";
1	ncSplice	exon	38535411	38535723	.	-	.	gene_id "ENSMUSG00000037138"; transcript_id "mmCircRNA-271"; exon_number "2" gene_name "Aff3"; gene_biotype "protein_coding"; oId "ce:circAff3-1385-001"; tissue "ce";
1	ncSplice	exon	38536826	38536946	.	-	.	gene_id "ENSMUSG00000037138"; transcript_id "mmCircRNA-271"; exon_number "3" gene_name "Aff3"; gene_biotype "protein_coding"; oId "ce:circAff3-1385-001"; tissue "ce";
1	ncSplice	exon	38538927	38539001	.	-	.	gene_id "ENSMUSG00000037138"; transcript_id "mmCircRNA-271"; exon_number "4" gene_name "Aff3"; gene_biotype "protein_coding"; oId "ce:circAff3-1385-001"; tissue "ce";
13	ncSplice	gene	9710146	9735466	.	-	.	gene_id "ENSMUSG00000021156"; gene_name "Zmynd11"; gene_source "ncSplice"; gene_biotype "protein_coding";
13	ncSplice	transcript	9710146	9735466	.	-	.	gene_id "ENSMUSG00000021156"; transcript_id "mmCircRNA-272"; gene_name "Zmynd11"; gene_biotype "protein_coding"; transcript_biotype "circRNA"; oId "ce:circZmynd11-1433-002"; tissue "ce";
13	ncSplice	exon	9710146	9710307	.	-	.	gene_id "ENSMUSG00000021156"; transcript_id "mmCircRNA-272"; exon_number "1" gene_name "Zmynd11"; gene_biotype "protein_coding"; oId "ce:circZmynd11-1433-002"; tissue "ce";
13	ncSplice	exon	9720773	9720932	.	-	.	gene_id "ENSMUSG00000021156"; transcript_id "mmCircRNA-272"; exon_number "2" gene_name "Zmynd11"; gene_biotype "protein_coding"; oId "ce:circZmynd11-1433-002"; tissue "ce";
13	ncSplice	exon	9735332	9735466	.	-	.	gene_id "ENSMUSG00000021156"; transcript_id "mmCircRNA-272"; exon_number "3" gene_name "Zmynd11"; gene_biotype "protein_coding"; oId "ce:circZmynd11-1433-002"; tissue "ce";
13	ncSplice	gene	98266151	98272852	.	+	.	gene_id "ENSMUSG00000021661"; gene_name "Ankra2"; gene_source "ncSplice"; gene_biotype "protein_coding";
13	ncSplice	transcript	98266151	98272852	.	+	.	gene_id "ENSMUSG00000021661"; transcript_id "mmCircRNA-273"; gene_name "Ankra2"; gene_biotype "protein_coding"; transcript_biotype "circRNA"; oId "ce:circAnkra2-1437-001"; tissue "ce";
13	ncSplice	exon	98266151	98266532	.	+	.	gene_id "ENSMUSG00000021661"; transcript_id "mmCircRNA-273"; exon_number "1" gene_name "Ankra2"; gene_biotype "protein_coding"; oId "ce:circAnkra2-1437-001"; tissue "ce";
13	ncSplice	exon	98267316	98267474	.	+	.	gene_id "ENSMUSG00000021661"; transcript_id "mmCircRNA-273"; exon_number "2" gene_name "Ankra2"; gene_biotype "protein_coding"; oId "ce:circAnkra2-1437-001"; tissue "ce";
13	ncSplice	exon	98268430	98268495	.	+	.	gene_id "ENSMUSG00000021661"; transcript_id "mmCircRNA-273"; exon_number "3" gene_name "Ankra2"; gene_biotype "protein_coding"; oId "ce:circAnkra2-1437-001"; tissue "ce";
13	ncSplice	exon	98271055	98271152	.	+	.	gene_id "ENSMUSG00000021661"; transcript_id "mmCircRNA-273"; exon_number "4" gene_name "Ankra2"; gene_biotype "protein_coding"; oId "ce:circAnkra2-1437-001"; tissue "ce";
13	ncSplice	exon	98271654	98271779	.	+	.	gene_id "ENSMUSG00000021661"; transcript_id "mmCircRNA-273"; exon_number "5" gene_name "Ankra2"; gene_biotype "protein_coding"; oId "ce:circAnkra2-1437-001"; tissue "ce";
13	ncSplice	exon	98272226	98272292	.	+	.	gene_id "ENSMUSG00000021661"; transcript_id "mmCircRNA-273"; exon_number "6" gene_name "Ankra2"; gene_biotype "protein_coding"; oId "ce:circAnkra2-1437-001"; tissue "ce";
13	ncSplice	exon	98272772	98272852	.	+	.	gene_id "ENSMUSG00000021661"; transcript_id "mmCircRNA-273"; exon_number "7" gene_name "Ankra2"; gene_biotype "protein_coding"; oId "ce:circAnkra2-1437-001"; tissue "ce";
14	ncSplice	gene	103275789	103291362	.	-	.	gene_id "ENSMUSG00000033004"; gene_name "Mycbp2"; gene_source "ncSplice"; gene_biotype "protein_coding";
14	ncSplice	transcript	103275789	103291362	.	-	.	gene_id "ENSMUSG00000033004"; transcript_id "mmCircRNA-274"; gene_name "Mycbp2"; gene_biotype "protein_coding"; transcript_biotype "circRNA"; oId "ce:circMycbp2-1456-001"; tissue "ce";
14	ncSplice	exon	103275789	103275890	.	-	.	gene_id "ENSMUSG00000033004"; transcript_id "mmCircRNA-274"; exon_number "1" gene_name "Mycbp2"; gene_biotype "protein_coding"; oId "ce:circMycbp2-1456-001"; tissue "ce";
14	ncSplice	exon	103276373	103276518	.	-	.	gene_id "ENSMUSG00000033004"; transcript_id "mmCircRNA-274"; exon_number "2" gene_name "Mycbp2"; gene_biotype "protein_coding"; oId "ce:circMycbp2-1456-001"; tissue "ce";
14	ncSplice	exon	103282598	103282802	.	-	.	gene_id "ENSMUSG00000033004"; transcript_id "mmCircRNA-274"; exon_number "3" gene_name "Mycbp2"; gene_biotype "protein_coding"; oId "ce:circMycbp2-1456-001"; tissue "ce";
14	ncSplice	exon	103285250	103285408	.	-	.	gene_id "ENSMUSG00000033004"; transcript_id "mmCircRNA-274"; exon_number "4" gene_name "Mycbp2"; gene_biotype "protein_coding"; oId "ce:circMycbp2-1456-001"; tissue "ce";
14	ncSplice	exon	103287206	103287370	.	-	.	gene_id "ENSMUSG00000033004"; transcript_id "mmCircRNA-274"; exon_number "5" gene_name "Mycbp2"; gene_biotype "protein_coding"; oId "ce:circMycbp2-1456-001"; tissue "ce";
14	ncSplice	exon	103288543	103288747	.	-	.	gene_id "ENSMUSG00000033004"; transcript_id "mmCircRNA-274"; exon_number "6" gene_name "Mycbp2"; gene_biotype "protein_coding"; oId "ce:circMycbp2-1456-001"; tissue "ce";
14	ncSplice	exon	103289544	103289620	.	-	.	gene_id "ENSMUSG00000033004"; transcript_id "mmCircRNA-274"; exon_number "7" gene_name "Mycbp2"; gene_biotype "protein_coding"; oId "ce:circMycbp2-1456-001"; tissue "ce";
14	ncSplice	exon	103291018	103291156	.	-	.	gene_id "ENSMUSG00000033004"; transcript_id "mmCircRNA-274"; exon_number "8" gene_name "Mycbp2"; gene_biotype "protein_coding"; oId "ce:circMycbp2-1456-001"; tissue "ce";
14	ncSplice	exon	103291289	103291362	.	-	.	gene_id "ENSMUSG00000033004"; transcript_id "mmCircRNA-274"; exon_number "9" gene_name "Mycbp2"; gene_biotype "protein_coding"; oId "ce:circMycbp2-1456-001"; tissue "ce";
14	ncSplice	gene	119044500	119077751	.	-	.	gene_id "ENSMUSG00000042104"; gene_name "Uggt2"; gene_source "ncSplice"; gene_biotype "protein_coding";
14	ncSplice	transcript	119044500	119077751	.	-	.	gene_id "ENSMUSG00000042104"; transcript_id "mmCircRNA-275"; gene_name "Uggt2"; gene_biotype "protein_coding"; transcript_biotype "circRNA"; oId "ce:circUggt2-1460-001"; tissue "ce";
14	ncSplice	exon	119044500	119044591	.	-	.	gene_id "ENSMUSG00000042104"; transcript_id "mmCircRNA-275"; exon_number "1" gene_name "Uggt2"; gene_biotype "protein_coding"; oId "ce:circUggt2-1460-001"; tissue "ce";
14	ncSplice	exon	119049181	119049279	.	-	.	gene_id "ENSMUSG00000042104"; transcript_id "mmCircRNA-275"; exon_number "2" gene_name "Uggt2"; gene_biotype "protein_coding"; oId "ce:circUggt2-1460-001"; tissue "ce";
14	ncSplice	exon	119049361	119049484	.	-	.	gene_id "ENSMUSG00000042104"; transcript_id "mmCircRNA-275"; exon_number "3" gene_name "Uggt2"; gene_biotype "protein_coding"; oId "ce:circUggt2-1460-001"; tissue "ce";
14	ncSplice	exon	119049636	119049800	.	-	.	gene_id "ENSMUSG00000042104"; transcript_id "mmCircRNA-275"; exon_number "4" gene_name "Uggt2"; gene_biotype "protein_coding"; oId "ce:circUggt2-1460-001"; tissue "ce";
14	ncSplice	exon	119054604	119054735	.	-	.	gene_id "ENSMUSG00000042104"; transcript_id "mmCircRNA-275"; exon_number "5" gene_name "Uggt2"; gene_biotype "protein_coding"; oId "ce:circUggt2-1460-001"; tissue "ce";
14	ncSplice	exon	119057563	119057698	.	-	.	gene_id "ENSMUSG00000042104"; transcript_id "mmCircRNA-275"; exon_number "6" gene_name "Uggt2"; gene_biotype "protein_coding"; oId "ce:circUggt2-1460-001"; tissue "ce";
14	ncSplice	exon	119058195	119058280	.	-	.	gene_id "ENSMUSG00000042104"; transcript_id "mmCircRNA-275"; exon_number "7" gene_name "Uggt2"; gene_biotype "protein_coding"; oId "ce:circUggt2-1460-001"; tissue "ce";
14	ncSplice	exon	119059021	119059140	.	-	.	gene_id "ENSMUSG00000042104"; transcript_id "mmCircRNA-275"; exon_number "8" gene_name "Uggt2"; gene_biotype "protein_coding"; oId "ce:circUggt2-1460-001"; tissue "ce";
14	ncSplice	exon	119061240	119061390	.	-	.	gene_id "ENSMUSG00000042104"; transcript_id "mmCircRNA-275"; exon_number "9" gene_name "Uggt2"; gene_biotype "protein_coding"; oId "ce:circUggt2-1460-001"; tissue "ce";
14	ncSplice	exon	119070811	119070902	.	-	.	gene_id "ENSMUSG00000042104"; transcript_id "mmCircRNA-275"; exon_number "10" gene_name "Uggt2"; gene_biotype "protein_coding"; oId "ce:circUggt2-1460-001"; tissue "ce";
14	ncSplice	exon	119075331	119075391	.	-	.	gene_id "ENSMUSG00000042104"; transcript_id "mmCircRNA-275"; exon_number "11" gene_name "Uggt2"; gene_biotype "protein_coding"; oId "ce:circUggt2-1460-001"; tissue "ce";
14	ncSplice	exon	119077652	119077751	.	-	.	gene_id "ENSMUSG00000042104"; transcript_id "mmCircRNA-275"; exon_number "12" gene_name "Uggt2"; gene_biotype "protein_coding"; oId "ce:circUggt2-1460-001"; tissue "ce";
14	ncSplice	gene	122133280	122139774	.	+	.	gene_id "ENSMUSG00000025544"; gene_name "Tm9sf2"; gene_source "ncSplice"; gene_biotype "protein_coding";
14	ncSplice	transcript	122133280	122139774	.	+	.	gene_id "ENSMUSG00000025544"; transcript_id "mmCircRNA-276"; gene_name "Tm9sf2"; gene_biotype "protein_coding"; transcript_biotype "circRNA"; oId "ce:circTm9sf2-1467-001"; tissue "ce";
14	ncSplice	exon	122133280	122133407	.	+	.	gene_id "ENSMUSG00000025544"; transcript_id "mmCircRNA-276"; exon_number "1" gene_name "Tm9sf2"; gene_biotype "protein_coding"; oId "ce:circTm9sf2-1467-001"; tissue "ce";
14	ncSplice	exon	122137372	122139774	.	+	.	gene_id "ENSMUSG00000025544"; transcript_id "mmCircRNA-276"; exon_number "2" gene_name "Tm9sf2"; gene_biotype "protein_coding"; oId "ce:circTm9sf2-1467-001"; tissue "ce";
14	ncSplice	gene	122650252	122668671	.	+	.	gene_id "ENSMUSG00000041650"; gene_name "Pcca"; gene_source "ncSplice"; gene_biotype "protein_coding";
14	ncSplice	transcript	122650252	122668671	.	+	.	gene_id "ENSMUSG00000041650"; transcript_id "mmCircRNA-277"; gene_name "Pcca"; gene_biotype "protein_coding"; transcript_biotype "circRNA"; oId "ce:circPcca-1476-001"; tissue "ce";
14	ncSplice	exon	122650252	122650330	.	+	.	gene_id "ENSMUSG00000041650"; transcript_id "mmCircRNA-277"; exon_number "1" gene_name "Pcca"; gene_biotype "protein_coding"; oId "ce:circPcca-1476-001"; tissue "ce";
14	ncSplice	exon	122658678	122658780	.	+	.	gene_id "ENSMUSG00000041650"; transcript_id "mmCircRNA-277"; exon_number "2" gene_name "Pcca"; gene_biotype "protein_coding"; oId "ce:circPcca-1476-001"; tissue "ce";
14	ncSplice	exon	122664254	122664348	.	+	.	gene_id "ENSMUSG00000041650"; transcript_id "mmCircRNA-277"; exon_number "3" gene_name "Pcca"; gene_biotype "protein_coding"; oId "ce:circPcca-1476-001"; tissue "ce";
14	ncSplice	exon	122668521	122668671	.	+	.	gene_id "ENSMUSG00000041650"; transcript_id "mmCircRNA-277"; exon_number "4" gene_name "Pcca"; gene_biotype "protein_coding"; oId "ce:circPcca-1476-001"; tissue "ce";
14	ncSplice	gene	122701055	122738004	.	+	.	gene_id "ENSMUSG00000041650"; gene_name "Pcca"; gene_source "ncSplice"; gene_biotype "protein_coding";
14	ncSplice	transcript	122701055	122738004	.	+	.	gene_id "ENSMUSG00000041650"; transcript_id "mmCircRNA-278"; gene_name "Pcca"; gene_biotype "protein_coding"; transcript_biotype "circRNA"; oId "ce:circPcca-1484-004"; tissue "ce";
14	ncSplice	exon	122701055	122701165	.	+	.	gene_id "ENSMUSG00000041650"; transcript_id "mmCircRNA-278"; exon_number "1" gene_name "Pcca"; gene_biotype "protein_coding"; oId "ce:circPcca-1484-004"; tissue "ce";
14	ncSplice	exon	122714023	122714125	.	+	.	gene_id "ENSMUSG00000041650"; transcript_id "mmCircRNA-278"; exon_number "2" gene_name "Pcca"; gene_biotype "protein_coding"; oId "ce:circPcca-1484-004"; tissue "ce";
14	ncSplice	exon	122737902	122738004	.	+	.	gene_id "ENSMUSG00000041650"; transcript_id "mmCircRNA-278"; exon_number "3" gene_name "Pcca"; gene_biotype "protein_coding"; oId "ce:circPcca-1484-004"; tissue "ce";
14	ncSplice	gene	123592682	123599989	.	-	.	gene_id "ENSMUSG00000000197"; gene_name "Nalcn"; gene_source "ncSplice"; gene_biotype "protein_coding";
14	ncSplice	transcript	123592682	123599989	.	-	.	gene_id "ENSMUSG00000000197"; transcript_id "mmCircRNA-279"; gene_name "Nalcn"; gene_biotype "protein_coding"; transcript_biotype "circRNA"; oId "ce:circNalcn-1496-001"; tissue "ce";
14	ncSplice	exon	123592682	123592810	.	-	.	gene_id "ENSMUSG00000000197"; transcript_id "mmCircRNA-279"; exon_number "1" gene_name "Nalcn"; gene_biotype "protein_coding"; oId "ce:circNalcn-1496-001"; tissue "ce";
14	ncSplice	exon	123592912	123593051	.	-	.	gene_id "ENSMUSG00000000197"; transcript_id "mmCircRNA-279"; exon_number "2" gene_name "Nalcn"; gene_biotype "protein_coding"; oId "ce:circNalcn-1496-001"; tissue "ce";
14	ncSplice	exon	123594486	123594569	.	-	.	gene_id "ENSMUSG00000000197"; transcript_id "mmCircRNA-279"; exon_number "3" gene_name "Nalcn"; gene_biotype "protein_coding"; oId "ce:circNalcn-1496-001"; tissue "ce";
14	ncSplice	exon	123596471	123596653	.	-	.	gene_id "ENSMUSG00000000197"; transcript_id "mmCircRNA-279"; exon_number "4" gene_name "Nalcn"; gene_biotype "protein_coding"; oId "ce:circNalcn-1496-001"; tissue "ce";
14	ncSplice	exon	123599843	123599989	.	-	.	gene_id "ENSMUSG00000000197"; transcript_id "mmCircRNA-279"; exon_number "5" gene_name "Nalcn"; gene_biotype "protein_coding"; oId "ce:circNalcn-1496-001"; tissue "ce";
14	ncSplice	gene	21618891	21637640	.	+	.	gene_id "ENSMUSG00000021767"; gene_name "Kat6b"; gene_source "ncSplice"; gene_biotype "protein_coding";
14	ncSplice	transcript	21618891	21637640	.	+	.	gene_id "ENSMUSG00000021767"; transcript_id "mmCircRNA-280"; gene_name "Kat6b"; gene_biotype "protein_coding"; transcript_biotype "circRNA"; oId "ce:circKat6b-1520-001"; tissue "ce";
14	ncSplice	exon	21618891	21619006	.	+	.	gene_id "ENSMUSG00000021767"; transcript_id "mmCircRNA-280"; exon_number "1" gene_name "Kat6b"; gene_biotype "protein_coding"; oId "ce:circKat6b-1520-001"; tissue "ce";
14	ncSplice	exon	21619218	21619299	.	+	.	gene_id "ENSMUSG00000021767"; transcript_id "mmCircRNA-280"; exon_number "2" gene_name "Kat6b"; gene_biotype "protein_coding"; oId "ce:circKat6b-1520-001"; tissue "ce";
14	ncSplice	exon	21621955	21622087	.	+	.	gene_id "ENSMUSG00000021767"; transcript_id "mmCircRNA-280"; exon_number "3" gene_name "Kat6b"; gene_biotype "protein_coding"; oId "ce:circKat6b-1520-001"; tissue "ce";
14	ncSplice	exon	21624833	21624888	.	+	.	gene_id "ENSMUSG00000021767"; transcript_id "mmCircRNA-280"; exon_number "4" gene_name "Kat6b"; gene_biotype "protein_coding"; oId "ce:circKat6b-1520-001"; tissue "ce";
14	ncSplice	exon	21626719	21626840	.	+	.	gene_id "ENSMUSG00000021767"; transcript_id "mmCircRNA-280"; exon_number "5" gene_name "Kat6b"; gene_biotype "protein_coding"; oId "ce:circKat6b-1520-001"; tissue "ce";
14	ncSplice	exon	21628813	21628928	.	+	.	gene_id "ENSMUSG00000021767"; transcript_id "mmCircRNA-280"; exon_number "6" gene_name "Kat6b"; gene_biotype "protein_coding"; oId "ce:circKat6b-1520-001"; tissue "ce";
14	ncSplice	exon	21631322	21631463	.	+	.	gene_id "ENSMUSG00000021767"; transcript_id "mmCircRNA-280"; exon_number "7" gene_name "Kat6b"; gene_biotype "protein_coding"; oId "ce:circKat6b-1520-001"; tissue "ce";
14	ncSplice	exon	21634476	21634637	.	+	.	gene_id "ENSMUSG00000021767"; transcript_id "mmCircRNA-280"; exon_number "8" gene_name "Kat6b"; gene_biotype "protein_coding"; oId "ce:circKat6b-1520-001"; tissue "ce";
14	ncSplice	exon	21637547	21637640	.	+	.	gene_id "ENSMUSG00000021767"; transcript_id "mmCircRNA-280"; exon_number "9" gene_name "Kat6b"; gene_biotype "protein_coding"; oId "ce:circKat6b-1520-001"; tissue "ce";
14	ncSplice	gene	27438599	27442620	.	+	.	gene_id "ENSMUSG00000040651"; gene_name "Fam208a"; gene_source "ncSplice"; gene_biotype "protein_coding";
14	ncSplice	transcript	27438599	27442620	.	+	.	gene_id "ENSMUSG00000040651"; transcript_id "mmCircRNA-281"; gene_name "Fam208a"; gene_biotype "protein_coding"; transcript_biotype "circRNA"; oId "ce:circFam208a-1533-001|ts:circFam208a-1177-001"; tissue "ce|ts";
14	ncSplice	exon	27438599	27438744	.	+	.	gene_id "ENSMUSG00000040651"; transcript_id "mmCircRNA-281"; exon_number "1" gene_name "Fam208a"; gene_biotype "protein_coding"; oId "ce:circFam208a-1533-001|ts:circFam208a-1177-001"; tissue "ce|ts";
14	ncSplice	exon	27440151	27440243	.	+	.	gene_id "ENSMUSG00000040651"; transcript_id "mmCircRNA-281"; exon_number "2" gene_name "Fam208a"; gene_biotype "protein_coding"; oId "ce:circFam208a-1533-001|ts:circFam208a-1177-001"; tissue "ce|ts";
14	ncSplice	exon	27441430	27441502	.	+	.	gene_id "ENSMUSG00000040651"; transcript_id "mmCircRNA-281"; exon_number "3" gene_name "Fam208a"; gene_biotype "protein_coding"; oId "ce:circFam208a-1533-001|ts:circFam208a-1177-001"; tissue "ce|ts";
14	ncSplice	exon	27441887	27441978	.	+	.	gene_id "ENSMUSG00000040651"; transcript_id "mmCircRNA-281"; exon_number "4" gene_name "Fam208a"; gene_biotype "protein_coding"; oId "ce:circFam208a-1533-001|ts:circFam208a-1177-001"; tissue "ce|ts";
14	ncSplice	exon	27442459	27442620	.	+	.	gene_id "ENSMUSG00000040651"; transcript_id "mmCircRNA-281"; exon_number "5" gene_name "Fam208a"; gene_biotype "protein_coding"; oId "ce:circFam208a-1533-001|ts:circFam208a-1177-001"; tissue "ce|ts";
14	ncSplice	gene	27438599	27450049	.	+	.	gene_id "ENSMUSG00000040651"; gene_name "Fam208a"; gene_source "ncSplice"; gene_biotype "protein_coding";
14	ncSplice	transcript	27438599	27450049	.	+	.	gene_id "ENSMUSG00000040651"; transcript_id "mmCircRNA-282"; gene_name "Fam208a"; gene_biotype "protein_coding"; transcript_biotype "circRNA"; oId "ce:circFam208a-1534-001"; tissue "ce";
14	ncSplice	exon	27438599	27438744	.	+	.	gene_id "ENSMUSG00000040651"; transcript_id "mmCircRNA-282"; exon_number "1" gene_name "Fam208a"; gene_biotype "protein_coding"; oId "ce:circFam208a-1534-001"; tissue "ce";
14	ncSplice	exon	27440151	27440243	.	+	.	gene_id "ENSMUSG00000040651"; transcript_id "mmCircRNA-282"; exon_number "2" gene_name "Fam208a"; gene_biotype "protein_coding"; oId "ce:circFam208a-1534-001"; tissue "ce";
14	ncSplice	exon	27441430	27441502	.	+	.	gene_id "ENSMUSG00000040651"; transcript_id "mmCircRNA-282"; exon_number "3" gene_name "Fam208a"; gene_biotype "protein_coding"; oId "ce:circFam208a-1534-001"; tissue "ce";
14	ncSplice	exon	27441887	27441978	.	+	.	gene_id "ENSMUSG00000040651"; transcript_id "mmCircRNA-282"; exon_number "4" gene_name "Fam208a"; gene_biotype "protein_coding"; oId "ce:circFam208a-1534-001"; tissue "ce";
14	ncSplice	exon	27442459	27442620	.	+	.	gene_id "ENSMUSG00000040651"; transcript_id "mmCircRNA-282"; exon_number "5" gene_name "Fam208a"; gene_biotype "protein_coding"; oId "ce:circFam208a-1534-001"; tissue "ce";
14	ncSplice	exon	27446385	27450049	.	+	.	gene_id "ENSMUSG00000040651"; transcript_id "mmCircRNA-282"; exon_number "6" gene_name "Fam208a"; gene_biotype "protein_coding"; oId "ce:circFam208a-1534-001"; tissue "ce";
14	ncSplice	gene	31030844	31036059	.	+	.	gene_id "ENSMUSG00000042323"; gene_name "Pbrm1"; gene_source "ncSplice"; gene_biotype "protein_coding";
14	ncSplice	transcript	31030844	31036059	.	+	.	gene_id "ENSMUSG00000042323"; transcript_id "mmCircRNA-283"; gene_name "Pbrm1"; gene_biotype "protein_coding"; transcript_biotype "circRNA"; oId "ce:circPbrm1-1545-001"; tissue "ce";
14	ncSplice	exon	31030844	31030991	.	+	.	gene_id "ENSMUSG00000042323"; transcript_id "mmCircRNA-283"; exon_number "1" gene_name "Pbrm1"; gene_biotype "protein_coding"; oId "ce:circPbrm1-1545-001"; tissue "ce";
14	ncSplice	exon	31032409	31032552	.	+	.	gene_id "ENSMUSG00000042323"; transcript_id "mmCircRNA-283"; exon_number "2" gene_name "Pbrm1"; gene_biotype "protein_coding"; oId "ce:circPbrm1-1545-001"; tissue "ce";
14	ncSplice	exon	31035943	31036059	.	+	.	gene_id "ENSMUSG00000042323"; transcript_id "mmCircRNA-283"; exon_number "3" gene_name "Pbrm1"; gene_biotype "protein_coding"; oId "ce:circPbrm1-1545-001"; tissue "ce";
14	ncSplice	gene	31482791	31492456	.	-	.	gene_id "ENSMUSG00000021891"; gene_name "Mettl6"; gene_source "ncSplice"; gene_biotype "protein_coding";
14	ncSplice	transcript	31482791	31492456	.	-	.	gene_id "ENSMUSG00000021891"; transcript_id "mmCircRNA-284"; gene_name "Mettl6"; gene_biotype "protein_coding"; transcript_biotype "circRNA"; oId "ce:circMettl6-1550-001|ts:circMettl6-1202-001"; tissue "ce|ts";
14	ncSplice	exon	31482791	31482932	.	-	.	gene_id "ENSMUSG00000021891"; transcript_id "mmCircRNA-284"; exon_number "1" gene_name "Mettl6"; gene_biotype "protein_coding"; oId "ce:circMettl6-1550-001|ts:circMettl6-1202-001"; tissue "ce|ts";
14	ncSplice	exon	31487571	31487741	.	-	.	gene_id "ENSMUSG00000021891"; transcript_id "mmCircRNA-284"; exon_number "2" gene_name "Mettl6"; gene_biotype "protein_coding"; oId "ce:circMettl6-1550-001|ts:circMettl6-1202-001"; tissue "ce|ts";
14	ncSplice	exon	31492322	31492456	.	-	.	gene_id "ENSMUSG00000021891"; transcript_id "mmCircRNA-284"; exon_number "3" gene_name "Mettl6"; gene_biotype "protein_coding"; oId "ce:circMettl6-1550-001|ts:circMettl6-1202-001"; tissue "ce|ts";
14	ncSplice	gene	36926839	36941264	.	-	.	gene_id "ENSMUSG00000058690"; gene_name "Ccser2"; gene_source "ncSplice"; gene_biotype "protein_coding";
14	ncSplice	transcript	36926839	36941264	.	-	.	gene_id "ENSMUSG00000058690"; transcript_id "mmCircRNA-285"; gene_name "Ccser2"; gene_biotype "protein_coding"; transcript_biotype "circRNA"; oId "ce:circCcser2-1566-002"; tissue "ce";
14	ncSplice	exon	36926839	36926929	.	-	.	gene_id "ENSMUSG00000058690"; transcript_id "mmCircRNA-285"; exon_number "1" gene_name "Ccser2"; gene_biotype "protein_coding"; oId "ce:circCcser2-1566-002"; tissue "ce";
14	ncSplice	exon	36938584	36938780	.	-	.	gene_id "ENSMUSG00000058690"; transcript_id "mmCircRNA-285"; exon_number "2" gene_name "Ccser2"; gene_biotype "protein_coding"; oId "ce:circCcser2-1566-002"; tissue "ce";
14	ncSplice	exon	36939812	36941264	.	-	.	gene_id "ENSMUSG00000058690"; transcript_id "mmCircRNA-285"; exon_number "3" gene_name "Ccser2"; gene_biotype "protein_coding"; oId "ce:circCcser2-1566-002"; tissue "ce";
14	ncSplice	gene	36938584	36941264	.	-	.	gene_id "ENSMUSG00000058690"; gene_name "Ccser2"; gene_source "ncSplice"; gene_biotype "protein_coding";
14	ncSplice	transcript	36938584	36941264	.	-	.	gene_id "ENSMUSG00000058690"; transcript_id "mmCircRNA-286"; gene_name "Ccser2"; gene_biotype "protein_coding"; transcript_biotype "circRNA"; oId "ce:circCcser2-1567-001"; tissue "ce";
14	ncSplice	exon	36938584	36938780	.	-	.	gene_id "ENSMUSG00000058690"; transcript_id "mmCircRNA-286"; exon_number "1" gene_name "Ccser2"; gene_biotype "protein_coding"; oId "ce:circCcser2-1567-001"; tissue "ce";
14	ncSplice	exon	36939812	36941264	.	-	.	gene_id "ENSMUSG00000058690"; transcript_id "mmCircRNA-286"; exon_number "2" gene_name "Ccser2"; gene_biotype "protein_coding"; oId "ce:circCcser2-1567-001"; tissue "ce";
14	ncSplice	gene	45244155	45246516	.	+	.	gene_id "ENSMUSG00000049092"; gene_name "Gpr137c"; gene_source "ncSplice"; gene_biotype "protein_coding";
14	ncSplice	transcript	45244155	45246516	.	+	.	gene_id "ENSMUSG00000049092"; transcript_id "mmCircRNA-287"; gene_name "Gpr137c"; gene_biotype "protein_coding"; transcript_biotype "circRNA"; oId "ce:circGpr137c-1576-001"; tissue "ce";
14	ncSplice	exon	45244155	45244198	.	+	.	gene_id "ENSMUSG00000049092"; transcript_id "mmCircRNA-287"; exon_number "1" gene_name "Gpr137c"; gene_biotype "protein_coding"; oId "ce:circGpr137c-1576-001"; tissue "ce";
14	ncSplice	exon	45246288	45246516	.	+	.	gene_id "ENSMUSG00000049092"; transcript_id "mmCircRNA-287"; exon_number "2" gene_name "Gpr137c"; gene_biotype "protein_coding"; oId "ce:circGpr137c-1576-001"; tissue "ce";
14	ncSplice	gene	54662168	54667161	.	-	.	gene_id "ENSMUSG00000022185"; gene_name "Acin1"; gene_source "ncSplice"; gene_biotype "protein_coding";
14	ncSplice	transcript	54662168	54667161	.	-	.	gene_id "ENSMUSG00000022185"; transcript_id "mmCircRNA-288"; gene_name "Acin1"; gene_biotype "protein_coding"; transcript_biotype "circRNA"; oId "ce:circAcin1-1583-001"; tissue "ce";
14	ncSplice	exon	54662168	54662283	.	-	.	gene_id "ENSMUSG00000022185"; transcript_id "mmCircRNA-288"; exon_number "1" gene_name "Acin1"; gene_biotype "protein_coding"; oId "ce:circAcin1-1583-001"; tissue "ce";
14	ncSplice	exon	54663587	54663805	.	-	.	gene_id "ENSMUSG00000022185"; transcript_id "mmCircRNA-288"; exon_number "2" gene_name "Acin1"; gene_biotype "protein_coding"; oId "ce:circAcin1-1583-001"; tissue "ce";
14	ncSplice	exon	54664372	54665634	.	-	.	gene_id "ENSMUSG00000022185"; transcript_id "mmCircRNA-288"; exon_number "3" gene_name "Acin1"; gene_biotype "protein_coding"; oId "ce:circAcin1-1583-001"; tissue "ce";
14	ncSplice	exon	54667073	54667161	.	-	.	gene_id "ENSMUSG00000022185"; transcript_id "mmCircRNA-288"; exon_number "4" gene_name "Acin1"; gene_biotype "protein_coding"; oId "ce:circAcin1-1583-001"; tissue "ce";
14	ncSplice	gene	55502225	55503031	.	+	.	gene_id "ENSMUSG00000022211"; gene_name "Lrrc16b"; gene_source "ncSplice"; gene_biotype "protein_coding";
14	ncSplice	transcript	55502225	55503031	.	+	.	gene_id "ENSMUSG00000022211"; transcript_id "mmCircRNA-289"; gene_name "Lrrc16b"; gene_biotype "protein_coding"; transcript_biotype "circRNA"; oId "ce:circLrrc16b-1584-001"; tissue "ce";
14	ncSplice	exon	55502225	55502433	.	+	.	gene_id "ENSMUSG00000022211"; transcript_id "mmCircRNA-289"; exon_number "1" gene_name "Lrrc16b"; gene_biotype "protein_coding"; oId "ce:circLrrc16b-1584-001"; tissue "ce";
14	ncSplice	exon	55502931	55503031	.	+	.	gene_id "ENSMUSG00000022211"; transcript_id "mmCircRNA-289"; exon_number "2" gene_name "Lrrc16b"; gene_biotype "protein_coding"; oId "ce:circLrrc16b-1584-001"; tissue "ce";
14	ncSplice	gene	63864216	63892833	.	+	.	gene_id "ENSMUSG00000021958"; gene_name "Pinx1"; gene_source "ncSplice"; gene_biotype "protein_coding";
14	ncSplice	transcript	63864216	63892833	.	+	.	gene_id "ENSMUSG00000021958"; transcript_id "mmCircRNA-290"; gene_name "Pinx1"; gene_biotype "protein_coding"; transcript_biotype "circRNA"; oId "ce:circPinx1-1604-001"; tissue "ce";
14	ncSplice	exon	63864216	63864325	.	+	.	gene_id "ENSMUSG00000021958"; transcript_id "mmCircRNA-290"; exon_number "1" gene_name "Pinx1"; gene_biotype "protein_coding"; oId "ce:circPinx1-1604-001"; tissue "ce";
14	ncSplice	exon	63866103	63866195	.	+	.	gene_id "ENSMUSG00000021958"; transcript_id "mmCircRNA-290"; exon_number "2" gene_name "Pinx1"; gene_biotype "protein_coding"; oId "ce:circPinx1-1604-001"; tissue "ce";
14	ncSplice	exon	63868519	63868597	.	+	.	gene_id "ENSMUSG00000021958"; transcript_id "mmCircRNA-290"; exon_number "3" gene_name "Pinx1"; gene_biotype "protein_coding"; oId "ce:circPinx1-1604-001"; tissue "ce";
14	ncSplice	exon	63872302	63872394	.	+	.	gene_id "ENSMUSG00000021958"; transcript_id "mmCircRNA-290"; exon_number "4" gene_name "Pinx1"; gene_biotype "protein_coding"; oId "ce:circPinx1-1604-001"; tissue "ce";
14	ncSplice	exon	63878112	63892833	.	+	.	gene_id "ENSMUSG00000021958"; transcript_id "mmCircRNA-290"; exon_number "5" gene_name "Pinx1"; gene_biotype "protein_coding"; oId "ce:circPinx1-1604-001"; tissue "ce";
14	ncSplice	gene	64285064	64313755	.	-	.	gene_id "ENSMUSG00000054733"; gene_name "Msra"; gene_source "ncSplice"; gene_biotype "protein_coding";
14	ncSplice	transcript	64285064	64313755	.	-	.	gene_id "ENSMUSG00000054733"; transcript_id "mmCircRNA-291"; gene_name "Msra"; gene_biotype "protein_coding"; transcript_biotype "circRNA"; oId "ce:circMsra-1607-001"; tissue "ce";
14	ncSplice	exon	64285064	64285183	.	-	.	gene_id "ENSMUSG00000054733"; transcript_id "mmCircRNA-291"; exon_number "1" gene_name "Msra"; gene_biotype "protein_coding"; oId "ce:circMsra-1607-001"; tissue "ce";
14	ncSplice	exon	64313687	64313755	.	-	.	gene_id "ENSMUSG00000054733"; transcript_id "mmCircRNA-291"; exon_number "2" gene_name "Msra"; gene_biotype "protein_coding"; oId "ce:circMsra-1607-001"; tissue "ce";
14	ncSplice	gene	64825601	64828668	.	-	.	gene_id "ENSMUSG00000021972"; gene_name "Hmbox1"; gene_source "ncSplice"; gene_biotype "protein_coding";
14	ncSplice	transcript	64825601	64828668	.	-	.	gene_id "ENSMUSG00000021972"; transcript_id "mmCircRNA-292"; gene_name "Hmbox1"; gene_biotype "protein_coding"; transcript_biotype "circRNA"; oId "ce:circHmbox1-1610-001"; tissue "ce";
14	ncSplice	exon	64825601	64825695	.	-	.	gene_id "ENSMUSG00000021972"; transcript_id "mmCircRNA-292"; exon_number "1" gene_name "Hmbox1"; gene_biotype "protein_coding"; oId "ce:circHmbox1-1610-001"; tissue "ce";
14	ncSplice	exon	64826772	64826867	.	-	.	gene_id "ENSMUSG00000021972"; transcript_id "mmCircRNA-292"; exon_number "2" gene_name "Hmbox1"; gene_biotype "protein_coding"; oId "ce:circHmbox1-1610-001"; tissue "ce";
14	ncSplice	exon	64828586	64828668	.	-	.	gene_id "ENSMUSG00000021972"; transcript_id "mmCircRNA-292"; exon_number "3" gene_name "Hmbox1"; gene_biotype "protein_coding"; oId "ce:circHmbox1-1610-001"; tissue "ce";
14	ncSplice	gene	70678079	70682850	.	-	.	gene_id "ENSMUSG00000022100"; gene_name "Xpo7"; gene_source "ncSplice"; gene_biotype "protein_coding";
14	ncSplice	transcript	70678079	70682850	.	-	.	gene_id "ENSMUSG00000022100"; transcript_id "mmCircRNA-293"; gene_name "Xpo7"; gene_biotype "protein_coding"; transcript_biotype "circRNA"; oId "ce:circXpo7-1622-001"; tissue "ce";
14	ncSplice	exon	70678079	70678167	.	-	.	gene_id "ENSMUSG00000022100"; transcript_id "mmCircRNA-293"; exon_number "1" gene_name "Xpo7"; gene_biotype "protein_coding"; oId "ce:circXpo7-1622-001"; tissue "ce";
14	ncSplice	exon	70681239	70681345	.	-	.	gene_id "ENSMUSG00000022100"; transcript_id "mmCircRNA-293"; exon_number "2" gene_name "Xpo7"; gene_biotype "protein_coding"; oId "ce:circXpo7-1622-001"; tissue "ce";
14	ncSplice	exon	70682333	70682441	.	-	.	gene_id "ENSMUSG00000022100"; transcript_id "mmCircRNA-293"; exon_number "3" gene_name "Xpo7"; gene_biotype "protein_coding"; oId "ce:circXpo7-1622-001"; tissue "ce";
14	ncSplice	exon	70682793	70682850	.	-	.	gene_id "ENSMUSG00000022100"; transcript_id "mmCircRNA-293"; exon_number "4" gene_name "Xpo7"; gene_biotype "protein_coding"; oId "ce:circXpo7-1622-001"; tissue "ce";
14	ncSplice	gene	74775581	74786390	.	-	.	gene_id "ENSMUSG00000068015"; gene_name "Lrch1"; gene_source "ncSplice"; gene_biotype "protein_coding";
14	ncSplice	transcript	74775581	74786390	.	-	.	gene_id "ENSMUSG00000068015"; transcript_id "mmCircRNA-294"; gene_name "Lrch1"; gene_biotype "protein_coding"; transcript_biotype "circRNA"; oId "ce:circLrch1-1628-001"; tissue "ce";
14	ncSplice	exon	74775581	74775658	.	-	.	gene_id "ENSMUSG00000068015"; transcript_id "mmCircRNA-294"; exon_number "1" gene_name "Lrch1"; gene_biotype "protein_coding"; oId "ce:circLrch1-1628-001"; tissue "ce";
14	ncSplice	exon	74785491	74785628	.	-	.	gene_id "ENSMUSG00000068015"; transcript_id "mmCircRNA-294"; exon_number "2" gene_name "Lrch1"; gene_biotype "protein_coding"; oId "ce:circLrch1-1628-001"; tissue "ce";
14	ncSplice	exon	74786281	74786390	.	-	.	gene_id "ENSMUSG00000068015"; transcript_id "mmCircRNA-294"; exon_number "3" gene_name "Lrch1"; gene_biotype "protein_coding"; oId "ce:circLrch1-1628-001"; tissue "ce";
14	ncSplice	gene	79009164	79026077	.	+	.	gene_id "ENSMUSG00000058997"; gene_name "Vwa8"; gene_source "ncSplice"; gene_biotype "protein_coding";
14	ncSplice	transcript	79009164	79026077	.	+	.	gene_id "ENSMUSG00000058997"; transcript_id "mmCircRNA-295"; gene_name "Vwa8"; gene_biotype "protein_coding"; transcript_biotype "circRNA"; oId "ce:circVwa8-1642-001"; tissue "ce";
14	ncSplice	exon	79009164	79009279	.	+	.	gene_id "ENSMUSG00000058997"; transcript_id "mmCircRNA-295"; exon_number "1" gene_name "Vwa8"; gene_biotype "protein_coding"; oId "ce:circVwa8-1642-001"; tissue "ce";
14	ncSplice	exon	79018607	79018713	.	+	.	gene_id "ENSMUSG00000058997"; transcript_id "mmCircRNA-295"; exon_number "2" gene_name "Vwa8"; gene_biotype "protein_coding"; oId "ce:circVwa8-1642-001"; tissue "ce";
14	ncSplice	exon	79020580	79020686	.	+	.	gene_id "ENSMUSG00000058997"; transcript_id "mmCircRNA-295"; exon_number "3" gene_name "Vwa8"; gene_biotype "protein_coding"; oId "ce:circVwa8-1642-001"; tissue "ce";
14	ncSplice	exon	79026006	79026077	.	+	.	gene_id "ENSMUSG00000058997"; transcript_id "mmCircRNA-295"; exon_number "4" gene_name "Vwa8"; gene_biotype "protein_coding"; oId "ce:circVwa8-1642-001"; tissue "ce";
14	ncSplice	gene	87472076	87487287	.	+	.	gene_id "ENSMUSG00000022019"; gene_name "Tdrd3"; gene_source "ncSplice"; gene_biotype "protein_coding";
14	ncSplice	transcript	87472076	87487287	.	+	.	gene_id "ENSMUSG00000022019"; transcript_id "mmCircRNA-296"; gene_name "Tdrd3"; gene_biotype "protein_coding"; transcript_biotype "circRNA"; oId "ce:circTdrd3-1652-001"; tissue "ce";
14	ncSplice	exon	87472076	87472236	.	+	.	gene_id "ENSMUSG00000022019"; transcript_id "mmCircRNA-296"; exon_number "1" gene_name "Tdrd3"; gene_biotype "protein_coding"; oId "ce:circTdrd3-1652-001"; tissue "ce";
14	ncSplice	exon	87474699	87474840	.	+	.	gene_id "ENSMUSG00000022019"; transcript_id "mmCircRNA-296"; exon_number "2" gene_name "Tdrd3"; gene_biotype "protein_coding"; oId "ce:circTdrd3-1652-001"; tissue "ce";
14	ncSplice	exon	87477390	87477461	.	+	.	gene_id "ENSMUSG00000022019"; transcript_id "mmCircRNA-296"; exon_number "3" gene_name "Tdrd3"; gene_biotype "protein_coding"; oId "ce:circTdrd3-1652-001"; tissue "ce";
14	ncSplice	exon	87480734	87480883	.	+	.	gene_id "ENSMUSG00000022019"; transcript_id "mmCircRNA-296"; exon_number "4" gene_name "Tdrd3"; gene_biotype "protein_coding"; oId "ce:circTdrd3-1652-001"; tissue "ce";
14	ncSplice	exon	87485559	87485699	.	+	.	gene_id "ENSMUSG00000022019"; transcript_id "mmCircRNA-296"; exon_number "5" gene_name "Tdrd3"; gene_biotype "protein_coding"; oId "ce:circTdrd3-1652-001"; tissue "ce";
14	ncSplice	exon	87486192	87486348	.	+	.	gene_id "ENSMUSG00000022019"; transcript_id "mmCircRNA-296"; exon_number "6" gene_name "Tdrd3"; gene_biotype "protein_coding"; oId "ce:circTdrd3-1652-001"; tissue "ce";
14	ncSplice	exon	87487162	87487287	.	+	.	gene_id "ENSMUSG00000022019"; transcript_id "mmCircRNA-296"; exon_number "7" gene_name "Tdrd3"; gene_biotype "protein_coding"; oId "ce:circTdrd3-1652-001"; tissue "ce";
14	ncSplice	gene	87472076	87511770	.	+	.	gene_id "ENSMUSG00000022019"; gene_name "Tdrd3"; gene_source "ncSplice"; gene_biotype "protein_coding";
14	ncSplice	transcript	87472076	87511770	.	+	.	gene_id "ENSMUSG00000022019"; transcript_id "mmCircRNA-297"; gene_name "Tdrd3"; gene_biotype "protein_coding"; transcript_biotype "circRNA"; oId "ce:circTdrd3-1653-001"; tissue "ce";
14	ncSplice	exon	87472076	87472236	.	+	.	gene_id "ENSMUSG00000022019"; transcript_id "mmCircRNA-297"; exon_number "1" gene_name "Tdrd3"; gene_biotype "protein_coding"; oId "ce:circTdrd3-1653-001"; tissue "ce";
14	ncSplice	exon	87474699	87474840	.	+	.	gene_id "ENSMUSG00000022019"; transcript_id "mmCircRNA-297"; exon_number "2" gene_name "Tdrd3"; gene_biotype "protein_coding"; oId "ce:circTdrd3-1653-001"; tissue "ce";
14	ncSplice	exon	87477390	87477461	.	+	.	gene_id "ENSMUSG00000022019"; transcript_id "mmCircRNA-297"; exon_number "3" gene_name "Tdrd3"; gene_biotype "protein_coding"; oId "ce:circTdrd3-1653-001"; tissue "ce";
14	ncSplice	exon	87480734	87480883	.	+	.	gene_id "ENSMUSG00000022019"; transcript_id "mmCircRNA-297"; exon_number "4" gene_name "Tdrd3"; gene_biotype "protein_coding"; oId "ce:circTdrd3-1653-001"; tissue "ce";
14	ncSplice	exon	87485559	87485699	.	+	.	gene_id "ENSMUSG00000022019"; transcript_id "mmCircRNA-297"; exon_number "5" gene_name "Tdrd3"; gene_biotype "protein_coding"; oId "ce:circTdrd3-1653-001"; tissue "ce";
14	ncSplice	exon	87486192	87486348	.	+	.	gene_id "ENSMUSG00000022019"; transcript_id "mmCircRNA-297"; exon_number "6" gene_name "Tdrd3"; gene_biotype "protein_coding"; oId "ce:circTdrd3-1653-001"; tissue "ce";
14	ncSplice	exon	87487162	87487287	.	+	.	gene_id "ENSMUSG00000022019"; transcript_id "mmCircRNA-297"; exon_number "7" gene_name "Tdrd3"; gene_biotype "protein_coding"; oId "ce:circTdrd3-1653-001"; tissue "ce";
14	ncSplice	exon	87505759	87506606	.	+	.	gene_id "ENSMUSG00000022019"; transcript_id "mmCircRNA-297"; exon_number "8" gene_name "Tdrd3"; gene_biotype "protein_coding"; oId "ce:circTdrd3-1653-001"; tissue "ce";
14	ncSplice	exon	87511645	87511770	.	+	.	gene_id "ENSMUSG00000022019"; transcript_id "mmCircRNA-297"; exon_number "9" gene_name "Tdrd3"; gene_biotype "protein_coding"; oId "ce:circTdrd3-1653-001"; tissue "ce";
14	ncSplice	gene	99133236	99150741	.	+	.	gene_id "ENSMUSG00000022064"; gene_name "Pibf1"; gene_source "ncSplice"; gene_biotype "protein_coding";
14	ncSplice	transcript	99133236	99150741	.	+	.	gene_id "ENSMUSG00000022064"; transcript_id "mmCircRNA-298"; gene_name "Pibf1"; gene_biotype "protein_coding"; transcript_biotype "circRNA"; oId "ce:circPibf1-1656-001|ts:circPibf1-1338-001"; tissue "ce|ts";
14	ncSplice	exon	99133236	99133369	.	+	.	gene_id "ENSMUSG00000022064"; transcript_id "mmCircRNA-298"; exon_number "1" gene_name "Pibf1"; gene_biotype "protein_coding"; oId "ce:circPibf1-1656-001|ts:circPibf1-1338-001"; tissue "ce|ts";
14	ncSplice	exon	99136453	99136561	.	+	.	gene_id "ENSMUSG00000022064"; transcript_id "mmCircRNA-298"; exon_number "2" gene_name "Pibf1"; gene_biotype "protein_coding"; oId "ce:circPibf1-1656-001|ts:circPibf1-1338-001"; tissue "ce|ts";
14	ncSplice	exon	99137042	99137223	.	+	.	gene_id "ENSMUSG00000022064"; transcript_id "mmCircRNA-298"; exon_number "3" gene_name "Pibf1"; gene_biotype "protein_coding"; oId "ce:circPibf1-1656-001|ts:circPibf1-1338-001"; tissue "ce|ts";
14	ncSplice	exon	99140537	99140662	.	+	.	gene_id "ENSMUSG00000022064"; transcript_id "mmCircRNA-298"; exon_number "4" gene_name "Pibf1"; gene_biotype "protein_coding"; oId "ce:circPibf1-1656-001|ts:circPibf1-1338-001"; tissue "ce|ts";
14	ncSplice	exon	99150643	99150741	.	+	.	gene_id "ENSMUSG00000022064"; transcript_id "mmCircRNA-298"; exon_number "5" gene_name "Pibf1"; gene_biotype "protein_coding"; oId "ce:circPibf1-1656-001|ts:circPibf1-1338-001"; tissue "ce|ts";
15	ncSplice	gene	101002034	101011190	.	+	.	gene_id "ENSMUSG00000023033"; gene_name "Scn8a"; gene_source "ncSplice"; gene_biotype "protein_coding";
15	ncSplice	transcript	101002034	101011190	.	+	.	gene_id "ENSMUSG00000023033"; transcript_id "mmCircRNA-299"; gene_name "Scn8a"; gene_biotype "protein_coding"; transcript_biotype "circRNA"; oId "ce:circScn8a-1674-001"; tissue "ce";
15	ncSplice	exon	101002034	101002166	.	+	.	gene_id "ENSMUSG00000023033"; transcript_id "mmCircRNA-299"; exon_number "1" gene_name "Scn8a"; gene_biotype "protein_coding"; oId "ce:circScn8a-1674-001"; tissue "ce";
15	ncSplice	exon	101008053	101008291	.	+	.	gene_id "ENSMUSG00000023033"; transcript_id "mmCircRNA-299"; exon_number "2" gene_name "Scn8a"; gene_biotype "protein_coding"; oId "ce:circScn8a-1674-001"; tissue "ce";
15	ncSplice	exon	101011017	101011190	.	+	.	gene_id "ENSMUSG00000023033"; transcript_id "mmCircRNA-299"; exon_number "3" gene_name "Scn8a"; gene_biotype "protein_coding"; oId "ce:circScn8a-1674-001"; tissue "ce";
1	ncSplice	gene	52188679	52215694	.	-	.	gene_id "ENSMUSG00000026103"; gene_name "Gls"; gene_source "ncSplice"; gene_biotype "protein_coding";
1	ncSplice	transcript	52188679	52215694	.	-	.	gene_id "ENSMUSG00000026103"; transcript_id "mmCircRNA-300"; gene_name "Gls"; gene_biotype "protein_coding"; transcript_biotype "circRNA"; oId "ce:circGls-1686-003"; tissue "ce";
1	ncSplice	exon	52188679	52188771	.	-	.	gene_id "ENSMUSG00000026103"; transcript_id "mmCircRNA-300"; exon_number "1" gene_name "Gls"; gene_biotype "protein_coding"; oId "ce:circGls-1686-003"; tissue "ce";
1	ncSplice	exon	52189423	52189554	.	-	.	gene_id "ENSMUSG00000026103"; transcript_id "mmCircRNA-300"; exon_number "2" gene_name "Gls"; gene_biotype "protein_coding"; oId "ce:circGls-1686-003"; tissue "ce";
1	ncSplice	exon	52191111	52191287	.	-	.	gene_id "ENSMUSG00000026103"; transcript_id "mmCircRNA-300"; exon_number "3" gene_name "Gls"; gene_biotype "protein_coding"; oId "ce:circGls-1686-003"; tissue "ce";
1	ncSplice	exon	52196165	52196215	.	-	.	gene_id "ENSMUSG00000026103"; transcript_id "mmCircRNA-300"; exon_number "4" gene_name "Gls"; gene_biotype "protein_coding"; oId "ce:circGls-1686-003"; tissue "ce";
1	ncSplice	exon	52196743	52196809	.	-	.	gene_id "ENSMUSG00000026103"; transcript_id "mmCircRNA-300"; exon_number "5" gene_name "Gls"; gene_biotype "protein_coding"; oId "ce:circGls-1686-003"; tissue "ce";
1	ncSplice	exon	52199711	52199887	.	-	.	gene_id "ENSMUSG00000026103"; transcript_id "mmCircRNA-300"; exon_number "6" gene_name "Gls"; gene_biotype "protein_coding"; oId "ce:circGls-1686-003"; tissue "ce";
1	ncSplice	exon	52200618	52200651	.	-	.	gene_id "ENSMUSG00000026103"; transcript_id "mmCircRNA-300"; exon_number "7" gene_name "Gls"; gene_biotype "protein_coding"; oId "ce:circGls-1686-003"; tissue "ce";
1	ncSplice	exon	52204346	52204516	.	-	.	gene_id "ENSMUSG00000026103"; transcript_id "mmCircRNA-300"; exon_number "8" gene_name "Gls"; gene_biotype "protein_coding"; oId "ce:circGls-1686-003"; tissue "ce";
1	ncSplice	exon	52207301	52207359	.	-	.	gene_id "ENSMUSG00000026103"; transcript_id "mmCircRNA-300"; exon_number "9" gene_name "Gls"; gene_biotype "protein_coding"; oId "ce:circGls-1686-003"; tissue "ce";
1	ncSplice	exon	52212203	52212366	.	-	.	gene_id "ENSMUSG00000026103"; transcript_id "mmCircRNA-300"; exon_number "10" gene_name "Gls"; gene_biotype "protein_coding"; oId "ce:circGls-1686-003"; tissue "ce";
1	ncSplice	exon	52214478	52214557	.	-	.	gene_id "ENSMUSG00000026103"; transcript_id "mmCircRNA-300"; exon_number "11" gene_name "Gls"; gene_biotype "protein_coding"; oId "ce:circGls-1686-003"; tissue "ce";
1	ncSplice	exon	52215565	52215694	.	-	.	gene_id "ENSMUSG00000026103"; transcript_id "mmCircRNA-300"; exon_number "12" gene_name "Gls"; gene_biotype "protein_coding"; oId "ce:circGls-1686-003"; tissue "ce";
1	ncSplice	gene	52212203	52215694	.	-	.	gene_id "ENSMUSG00000026103"; gene_name "Gls"; gene_source "ncSplice"; gene_biotype "protein_coding";
1	ncSplice	transcript	52212203	52215694	.	-	.	gene_id "ENSMUSG00000026103"; transcript_id "mmCircRNA-301"; gene_name "Gls"; gene_biotype "protein_coding"; transcript_biotype "circRNA"; oId "ce:circGls-1689-001"; tissue "ce";
1	ncSplice	exon	52212203	52212366	.	-	.	gene_id "ENSMUSG00000026103"; transcript_id "mmCircRNA-301"; exon_number "1" gene_name "Gls"; gene_biotype "protein_coding"; oId "ce:circGls-1689-001"; tissue "ce";
1	ncSplice	exon	52214478	52214557	.	-	.	gene_id "ENSMUSG00000026103"; transcript_id "mmCircRNA-301"; exon_number "2" gene_name "Gls"; gene_biotype "protein_coding"; oId "ce:circGls-1689-001"; tissue "ce";
1	ncSplice	exon	52215565	52215694	.	-	.	gene_id "ENSMUSG00000026103"; transcript_id "mmCircRNA-301"; exon_number "3" gene_name "Gls"; gene_biotype "protein_coding"; oId "ce:circGls-1689-001"; tissue "ce";
15	ncSplice	gene	23226683	23259728	.	+	.	gene_id "ENSMUSG00000040420"; gene_name "Cdh18"; gene_source "ncSplice"; gene_biotype "protein_coding";
15	ncSplice	transcript	23226683	23259728	.	+	.	gene_id "ENSMUSG00000040420"; transcript_id "mmCircRNA-302"; gene_name "Cdh18"; gene_biotype "protein_coding"; transcript_biotype "circRNA"; oId "ce:circCdh18-1692-001"; tissue "ce";
15	ncSplice	exon	23226683	23226977	.	+	.	gene_id "ENSMUSG00000040420"; transcript_id "mmCircRNA-302"; exon_number "1" gene_name "Cdh18"; gene_biotype "protein_coding"; oId "ce:circCdh18-1692-001"; tissue "ce";
15	ncSplice	exon	23259609	23259728	.	+	.	gene_id "ENSMUSG00000040420"; transcript_id "mmCircRNA-302"; exon_number "2" gene_name "Cdh18"; gene_biotype "protein_coding"; oId "ce:circCdh18-1692-001"; tissue "ce";
1	ncSplice	gene	52479238	52490755	.	-	.	gene_id "ENSMUSG00000002881"; gene_name "Nab1"; gene_source "ncSplice"; gene_biotype "protein_coding";
1	ncSplice	transcript	52479238	52490755	.	-	.	gene_id "ENSMUSG00000002881"; transcript_id "mmCircRNA-303"; gene_name "Nab1"; gene_biotype "protein_coding"; transcript_biotype "circRNA"; oId "ce:circNab1-1700-001"; tissue "ce";
1	ncSplice	exon	52479238	52479289	.	-	.	gene_id "ENSMUSG00000002881"; transcript_id "mmCircRNA-303"; exon_number "1" gene_name "Nab1"; gene_biotype "protein_coding"; oId "ce:circNab1-1700-001"; tissue "ce";
1	ncSplice	exon	52480871	52481004	.	-	.	gene_id "ENSMUSG00000002881"; transcript_id "mmCircRNA-303"; exon_number "2" gene_name "Nab1"; gene_biotype "protein_coding"; oId "ce:circNab1-1700-001"; tissue "ce";
1	ncSplice	exon	52489921	52490755	.	-	.	gene_id "ENSMUSG00000002881"; transcript_id "mmCircRNA-303"; exon_number "3" gene_name "Nab1"; gene_biotype "protein_coding"; oId "ce:circNab1-1700-001"; tissue "ce";
1	ncSplice	gene	53256629	53290423	.	-	.	gene_id "ENSMUSG00000026098"; gene_name "Pms1"; gene_source "ncSplice"; gene_biotype "protein_coding";
1	ncSplice	transcript	53256629	53290423	.	-	.	gene_id "ENSMUSG00000026098"; transcript_id "mmCircRNA-304"; gene_name "Pms1"; gene_biotype "protein_coding"; transcript_biotype "circRNA"; oId "ce:circPms1-1718-001"; tissue "ce";
1	ncSplice	exon	53256629	53265428	.	-	.	gene_id "ENSMUSG00000026098"; transcript_id "mmCircRNA-304"; exon_number "1" gene_name "Pms1"; gene_biotype "protein_coding"; oId "ce:circPms1-1718-001"; tissue "ce";
1	ncSplice	exon	53267828	53267930	.	-	.	gene_id "ENSMUSG00000026098"; transcript_id "mmCircRNA-304"; exon_number "2" gene_name "Pms1"; gene_biotype "protein_coding"; oId "ce:circPms1-1718-001"; tissue "ce";
1	ncSplice	exon	53275070	53275252	.	-	.	gene_id "ENSMUSG00000026098"; transcript_id "mmCircRNA-304"; exon_number "3" gene_name "Pms1"; gene_biotype "protein_coding"; oId "ce:circPms1-1718-001"; tissue "ce";
1	ncSplice	exon	53281941	53282092	.	-	.	gene_id "ENSMUSG00000026098"; transcript_id "mmCircRNA-304"; exon_number "4" gene_name "Pms1"; gene_biotype "protein_coding"; oId "ce:circPms1-1718-001"; tissue "ce";
1	ncSplice	exon	53290379	53290423	.	-	.	gene_id "ENSMUSG00000026098"; transcript_id "mmCircRNA-304"; exon_number "5" gene_name "Pms1"; gene_biotype "protein_coding"; oId "ce:circPms1-1718-001"; tissue "ce";
15	ncSplice	gene	35072430	35115645	.	-	.	gene_id "ENSMUSG00000022329"; gene_name "Stk3"; gene_source "ncSplice"; gene_biotype "protein_coding";
15	ncSplice	transcript	35072430	35115645	.	-	.	gene_id "ENSMUSG00000022329"; transcript_id "mmCircRNA-305"; gene_name "Stk3"; gene_biotype "protein_coding"; transcript_biotype "circRNA"; oId "ce:circStk3-1726-001"; tissue "ce";
15	ncSplice	exon	35072430	35072597	.	-	.	gene_id "ENSMUSG00000022329"; transcript_id "mmCircRNA-305"; exon_number "1" gene_name "Stk3"; gene_biotype "protein_coding"; oId "ce:circStk3-1726-001"; tissue "ce";
15	ncSplice	exon	35073057	35073221	.	-	.	gene_id "ENSMUSG00000022329"; transcript_id "mmCircRNA-305"; exon_number "2" gene_name "Stk3"; gene_biotype "protein_coding"; oId "ce:circStk3-1726-001"; tissue "ce";
15	ncSplice	exon	35099434	35099548	.	-	.	gene_id "ENSMUSG00000022329"; transcript_id "mmCircRNA-305"; exon_number "3" gene_name "Stk3"; gene_biotype "protein_coding"; oId "ce:circStk3-1726-001"; tissue "ce";
15	ncSplice	exon	35114529	35114657	.	-	.	gene_id "ENSMUSG00000022329"; transcript_id "mmCircRNA-305"; exon_number "4" gene_name "Stk3"; gene_biotype "protein_coding"; oId "ce:circStk3-1726-001"; tissue "ce";
15	ncSplice	exon	35114938	35114958	.	-	.	gene_id "ENSMUSG00000022329"; transcript_id "mmCircRNA-305"; exon_number "5" gene_name "Stk3"; gene_biotype "protein_coding"; oId "ce:circStk3-1726-001"; tissue "ce";
15	ncSplice	exon	35115565	35115645	.	-	.	gene_id "ENSMUSG00000022329"; transcript_id "mmCircRNA-305"; exon_number "6" gene_name "Stk3"; gene_biotype "protein_coding"; oId "ce:circStk3-1726-001"; tissue "ce";
15	ncSplice	gene	35099434	35115645	.	-	.	gene_id "ENSMUSG00000022329"; gene_name "Stk3"; gene_source "ncSplice"; gene_biotype "protein_coding";
15	ncSplice	transcript	35099434	35115645	.	-	.	gene_id "ENSMUSG00000022329"; transcript_id "mmCircRNA-306"; gene_name "Stk3"; gene_biotype "protein_coding"; transcript_biotype "circRNA"; oId "ce:circStk3-1728-001"; tissue "ce";
15	ncSplice	exon	35099434	35104420	.	-	.	gene_id "ENSMUSG00000022329"; transcript_id "mmCircRNA-306"; exon_number "1" gene_name "Stk3"; gene_biotype "protein_coding"; oId "ce:circStk3-1728-001"; tissue "ce";
15	ncSplice	exon	35114529	35114657	.	-	.	gene_id "ENSMUSG00000022329"; transcript_id "mmCircRNA-306"; exon_number "2" gene_name "Stk3"; gene_biotype "protein_coding"; oId "ce:circStk3-1728-001"; tissue "ce";
15	ncSplice	exon	35114938	35114958	.	-	.	gene_id "ENSMUSG00000022329"; transcript_id "mmCircRNA-306"; exon_number "3" gene_name "Stk3"; gene_biotype "protein_coding"; oId "ce:circStk3-1728-001"; tissue "ce";
15	ncSplice	exon	35115565	35115645	.	-	.	gene_id "ENSMUSG00000022329"; transcript_id "mmCircRNA-306"; exon_number "4" gene_name "Stk3"; gene_biotype "protein_coding"; oId "ce:circStk3-1728-001"; tissue "ce";
15	ncSplice	gene	39274976	39345620	.	+	.	gene_id "ENSMUSG00000037386"; gene_name "Rims2"; gene_source "ncSplice"; gene_biotype "protein_coding";
15	ncSplice	transcript	39274976	39345620	.	+	.	gene_id "ENSMUSG00000037386"; transcript_id "mmCircRNA-307"; gene_name "Rims2"; gene_biotype "protein_coding"; transcript_biotype "circRNA"; oId "ce:circRims2-1752-001"; tissue "ce";
15	ncSplice	exon	39274976	39275008	.	+	.	gene_id "ENSMUSG00000037386"; transcript_id "mmCircRNA-307"; exon_number "1" gene_name "Rims2"; gene_biotype "protein_coding"; oId "ce:circRims2-1752-001"; tissue "ce";
15	ncSplice	exon	39275414	39275500	.	+	.	gene_id "ENSMUSG00000037386"; transcript_id "mmCircRNA-307"; exon_number "2" gene_name "Rims2"; gene_biotype "protein_coding"; oId "ce:circRims2-1752-001"; tissue "ce";
15	ncSplice	exon	39292102	39292312	.	+	.	gene_id "ENSMUSG00000037386"; transcript_id "mmCircRNA-307"; exon_number "3" gene_name "Rims2"; gene_biotype "protein_coding"; oId "ce:circRims2-1752-001"; tissue "ce";
15	ncSplice	exon	39345310	39345620	.	+	.	gene_id "ENSMUSG00000037386"; transcript_id "mmCircRNA-307"; exon_number "4" gene_name "Rims2"; gene_biotype "protein_coding"; oId "ce:circRims2-1752-001"; tissue "ce";
15	ncSplice	gene	39292102	39345620	.	+	.	gene_id "ENSMUSG00000037386"; gene_name "Rims2"; gene_source "ncSplice"; gene_biotype "protein_coding";
15	ncSplice	transcript	39292102	39345620	.	+	.	gene_id "ENSMUSG00000037386"; transcript_id "mmCircRNA-308"; gene_name "Rims2"; gene_biotype "protein_coding"; transcript_biotype "circRNA"; oId "ce:circRims2-1753-001|ts:circRims2-1417-003"; tissue "ce|ts";
15	ncSplice	exon	39292102	39292312	.	+	.	gene_id "ENSMUSG00000037386"; transcript_id "mmCircRNA-308"; exon_number "1" gene_name "Rims2"; gene_biotype "protein_coding"; oId "ce:circRims2-1753-001|ts:circRims2-1417-003"; tissue "ce|ts";
15	ncSplice	exon	39345310	39345620	.	+	.	gene_id "ENSMUSG00000037386"; transcript_id "mmCircRNA-308"; exon_number "2" gene_name "Rims2"; gene_biotype "protein_coding"; oId "ce:circRims2-1753-001|ts:circRims2-1417-003"; tissue "ce|ts";
15	ncSplice	gene	39436997	39478710	.	+	.	gene_id "ENSMUSG00000037386"; gene_name "Rims2"; gene_source "ncSplice"; gene_biotype "protein_coding";
15	ncSplice	transcript	39436997	39478710	.	+	.	gene_id "ENSMUSG00000037386"; transcript_id "mmCircRNA-309"; gene_name "Rims2"; gene_biotype "protein_coding"; transcript_biotype "circRNA"; oId "ce:circRims2-1757-001"; tissue "ce";
15	ncSplice	exon	39436997	39437922	.	+	.	gene_id "ENSMUSG00000037386"; transcript_id "mmCircRNA-309"; exon_number "1" gene_name "Rims2"; gene_biotype "protein_coding"; oId "ce:circRims2-1757-001"; tissue "ce";
15	ncSplice	exon	39452224	39452432	.	+	.	gene_id "ENSMUSG00000037386"; transcript_id "mmCircRNA-309"; exon_number "2" gene_name "Rims2"; gene_biotype "protein_coding"; oId "ce:circRims2-1757-001"; tissue "ce";
15	ncSplice	exon	39454360	39454479	.	+	.	gene_id "ENSMUSG00000037386"; transcript_id "mmCircRNA-309"; exon_number "3" gene_name "Rims2"; gene_biotype "protein_coding"; oId "ce:circRims2-1757-001"; tissue "ce";
15	ncSplice	exon	39456678	39456777	.	+	.	gene_id "ENSMUSG00000037386"; transcript_id "mmCircRNA-309"; exon_number "4" gene_name "Rims2"; gene_biotype "protein_coding"; oId "ce:circRims2-1757-001"; tissue "ce";
15	ncSplice	exon	39457764	39457887	.	+	.	gene_id "ENSMUSG00000037386"; transcript_id "mmCircRNA-309"; exon_number "5" gene_name "Rims2"; gene_biotype "protein_coding"; oId "ce:circRims2-1757-001"; tissue "ce";
15	ncSplice	exon	39459589	39459635	.	+	.	gene_id "ENSMUSG00000037386"; transcript_id "mmCircRNA-309"; exon_number "6" gene_name "Rims2"; gene_biotype "protein_coding"; oId "ce:circRims2-1757-001"; tissue "ce";
15	ncSplice	exon	39462498	39462610	.	+	.	gene_id "ENSMUSG00000037386"; transcript_id "mmCircRNA-309"; exon_number "7" gene_name "Rims2"; gene_biotype "protein_coding"; oId "ce:circRims2-1757-001"; tissue "ce";
15	ncSplice	exon	39472334	39472464	.	+	.	gene_id "ENSMUSG00000037386"; transcript_id "mmCircRNA-309"; exon_number "8" gene_name "Rims2"; gene_biotype "protein_coding"; oId "ce:circRims2-1757-001"; tissue "ce";
15	ncSplice	exon	39476380	39476551	.	+	.	gene_id "ENSMUSG00000037386"; transcript_id "mmCircRNA-309"; exon_number "9" gene_name "Rims2"; gene_biotype "protein_coding"; oId "ce:circRims2-1757-001"; tissue "ce";
15	ncSplice	exon	39478557	39478710	.	+	.	gene_id "ENSMUSG00000037386"; transcript_id "mmCircRNA-309"; exon_number "10" gene_name "Rims2"; gene_biotype "protein_coding"; oId "ce:circRims2-1757-001"; tissue "ce";
15	ncSplice	gene	39452040	39462610	.	+	.	gene_id "ENSMUSG00000037386"; gene_name "Rims2"; gene_source "ncSplice"; gene_biotype "protein_coding";
15	ncSplice	transcript	39452040	39462610	.	+	.	gene_id "ENSMUSG00000037386"; transcript_id "mmCircRNA-310"; gene_name "Rims2"; gene_biotype "protein_coding"; transcript_biotype "circRNA"; oId "ce:circRims2-1759-001"; tissue "ce";
15	ncSplice	exon	39452040	39452432	.	+	.	gene_id "ENSMUSG00000037386"; transcript_id "mmCircRNA-310"; exon_number "1" gene_name "Rims2"; gene_biotype "protein_coding"; oId "ce:circRims2-1759-001"; tissue "ce";
15	ncSplice	exon	39454360	39454479	.	+	.	gene_id "ENSMUSG00000037386"; transcript_id "mmCircRNA-310"; exon_number "2" gene_name "Rims2"; gene_biotype "protein_coding"; oId "ce:circRims2-1759-001"; tissue "ce";
15	ncSplice	exon	39456678	39456777	.	+	.	gene_id "ENSMUSG00000037386"; transcript_id "mmCircRNA-310"; exon_number "3" gene_name "Rims2"; gene_biotype "protein_coding"; oId "ce:circRims2-1759-001"; tissue "ce";
15	ncSplice	exon	39457764	39457887	.	+	.	gene_id "ENSMUSG00000037386"; transcript_id "mmCircRNA-310"; exon_number "4" gene_name "Rims2"; gene_biotype "protein_coding"; oId "ce:circRims2-1759-001"; tissue "ce";
15	ncSplice	exon	39459589	39459635	.	+	.	gene_id "ENSMUSG00000037386"; transcript_id "mmCircRNA-310"; exon_number "5" gene_name "Rims2"; gene_biotype "protein_coding"; oId "ce:circRims2-1759-001"; tissue "ce";
15	ncSplice	exon	39462498	39462610	.	+	.	gene_id "ENSMUSG00000037386"; transcript_id "mmCircRNA-310"; exon_number "6" gene_name "Rims2"; gene_biotype "protein_coding"; oId "ce:circRims2-1759-001"; tissue "ce";
15	ncSplice	gene	39452224	39478710	.	+	.	gene_id "ENSMUSG00000037386"; gene_name "Rims2"; gene_source "ncSplice"; gene_biotype "protein_coding";
15	ncSplice	transcript	39452224	39478710	.	+	.	gene_id "ENSMUSG00000037386"; transcript_id "mmCircRNA-311"; gene_name "Rims2"; gene_biotype "protein_coding"; transcript_biotype "circRNA"; oId "ce:circRims2-1764-001"; tissue "ce";
15	ncSplice	exon	39452224	39452432	.	+	.	gene_id "ENSMUSG00000037386"; transcript_id "mmCircRNA-311"; exon_number "1" gene_name "Rims2"; gene_biotype "protein_coding"; oId "ce:circRims2-1764-001"; tissue "ce";
15	ncSplice	exon	39454360	39454479	.	+	.	gene_id "ENSMUSG00000037386"; transcript_id "mmCircRNA-311"; exon_number "2" gene_name "Rims2"; gene_biotype "protein_coding"; oId "ce:circRims2-1764-001"; tissue "ce";
15	ncSplice	exon	39456678	39456777	.	+	.	gene_id "ENSMUSG00000037386"; transcript_id "mmCircRNA-311"; exon_number "3" gene_name "Rims2"; gene_biotype "protein_coding"; oId "ce:circRims2-1764-001"; tissue "ce";
15	ncSplice	exon	39457764	39457887	.	+	.	gene_id "ENSMUSG00000037386"; transcript_id "mmCircRNA-311"; exon_number "4" gene_name "Rims2"; gene_biotype "protein_coding"; oId "ce:circRims2-1764-001"; tissue "ce";
15	ncSplice	exon	39459589	39459635	.	+	.	gene_id "ENSMUSG00000037386"; transcript_id "mmCircRNA-311"; exon_number "5" gene_name "Rims2"; gene_biotype "protein_coding"; oId "ce:circRims2-1764-001"; tissue "ce";
15	ncSplice	exon	39462498	39462610	.	+	.	gene_id "ENSMUSG00000037386"; transcript_id "mmCircRNA-311"; exon_number "6" gene_name "Rims2"; gene_biotype "protein_coding"; oId "ce:circRims2-1764-001"; tissue "ce";
15	ncSplice	exon	39472334	39472464	.	+	.	gene_id "ENSMUSG00000037386"; transcript_id "mmCircRNA-311"; exon_number "7" gene_name "Rims2"; gene_biotype "protein_coding"; oId "ce:circRims2-1764-001"; tissue "ce";
15	ncSplice	exon	39476380	39476551	.	+	.	gene_id "ENSMUSG00000037386"; transcript_id "mmCircRNA-311"; exon_number "8" gene_name "Rims2"; gene_biotype "protein_coding"; oId "ce:circRims2-1764-001"; tissue "ce";
15	ncSplice	exon	39478557	39478710	.	+	.	gene_id "ENSMUSG00000037386"; transcript_id "mmCircRNA-311"; exon_number "9" gene_name "Rims2"; gene_biotype "protein_coding"; oId "ce:circRims2-1764-001"; tissue "ce";
15	ncSplice	gene	39452224	39511374	.	+	.	gene_id "ENSMUSG00000037386"; gene_name "Rims2"; gene_source "ncSplice"; gene_biotype "protein_coding";
15	ncSplice	transcript	39452224	39511374	.	+	.	gene_id "ENSMUSG00000037386"; transcript_id "mmCircRNA-312"; gene_name "Rims2"; gene_biotype "protein_coding"; transcript_biotype "circRNA"; oId "ce:circRims2-1765-001"; tissue "ce";
15	ncSplice	exon	39452224	39452432	.	+	.	gene_id "ENSMUSG00000037386"; transcript_id "mmCircRNA-312"; exon_number "1" gene_name "Rims2"; gene_biotype "protein_coding"; oId "ce:circRims2-1765-001"; tissue "ce";
15	ncSplice	exon	39454360	39454479	.	+	.	gene_id "ENSMUSG00000037386"; transcript_id "mmCircRNA-312"; exon_number "2" gene_name "Rims2"; gene_biotype "protein_coding"; oId "ce:circRims2-1765-001"; tissue "ce";
15	ncSplice	exon	39456678	39456777	.	+	.	gene_id "ENSMUSG00000037386"; transcript_id "mmCircRNA-312"; exon_number "3" gene_name "Rims2"; gene_biotype "protein_coding"; oId "ce:circRims2-1765-001"; tissue "ce";
15	ncSplice	exon	39457764	39457887	.	+	.	gene_id "ENSMUSG00000037386"; transcript_id "mmCircRNA-312"; exon_number "4" gene_name "Rims2"; gene_biotype "protein_coding"; oId "ce:circRims2-1765-001"; tissue "ce";
15	ncSplice	exon	39459589	39459635	.	+	.	gene_id "ENSMUSG00000037386"; transcript_id "mmCircRNA-312"; exon_number "5" gene_name "Rims2"; gene_biotype "protein_coding"; oId "ce:circRims2-1765-001"; tissue "ce";
15	ncSplice	exon	39462498	39462610	.	+	.	gene_id "ENSMUSG00000037386"; transcript_id "mmCircRNA-312"; exon_number "6" gene_name "Rims2"; gene_biotype "protein_coding"; oId "ce:circRims2-1765-001"; tissue "ce";
15	ncSplice	exon	39472334	39472464	.	+	.	gene_id "ENSMUSG00000037386"; transcript_id "mmCircRNA-312"; exon_number "7" gene_name "Rims2"; gene_biotype "protein_coding"; oId "ce:circRims2-1765-001"; tissue "ce";
15	ncSplice	exon	39476380	39476551	.	+	.	gene_id "ENSMUSG00000037386"; transcript_id "mmCircRNA-312"; exon_number "8" gene_name "Rims2"; gene_biotype "protein_coding"; oId "ce:circRims2-1765-001"; tissue "ce";
15	ncSplice	exon	39478557	39478710	.	+	.	gene_id "ENSMUSG00000037386"; transcript_id "mmCircRNA-312"; exon_number "9" gene_name "Rims2"; gene_biotype "protein_coding"; oId "ce:circRims2-1765-001"; tissue "ce";
15	ncSplice	exon	39506966	39507034	.	+	.	gene_id "ENSMUSG00000037386"; transcript_id "mmCircRNA-312"; exon_number "10" gene_name "Rims2"; gene_biotype "protein_coding"; oId "ce:circRims2-1765-001"; tissue "ce";
15	ncSplice	exon	39509645	39509801	.	+	.	gene_id "ENSMUSG00000037386"; transcript_id "mmCircRNA-312"; exon_number "11" gene_name "Rims2"; gene_biotype "protein_coding"; oId "ce:circRims2-1765-001"; tissue "ce";
15	ncSplice	exon	39511264	39511374	.	+	.	gene_id "ENSMUSG00000037386"; transcript_id "mmCircRNA-312"; exon_number "12" gene_name "Rims2"; gene_biotype "protein_coding"; oId "ce:circRims2-1765-001"; tissue "ce";
15	ncSplice	gene	39534838	39585762	.	+	.	gene_id "ENSMUSG00000037386"; gene_name "Rims2"; gene_source "ncSplice"; gene_biotype "protein_coding";
15	ncSplice	transcript	39534838	39585762	.	+	.	gene_id "ENSMUSG00000037386"; transcript_id "mmCircRNA-313"; gene_name "Rims2"; gene_biotype "protein_coding"; transcript_biotype "circRNA"; oId "ce:circRims2-1774-001"; tissue "ce";
15	ncSplice	exon	39534838	39535017	.	+	.	gene_id "ENSMUSG00000037386"; transcript_id "mmCircRNA-313"; exon_number "1" gene_name "Rims2"; gene_biotype "protein_coding"; oId "ce:circRims2-1774-001"; tissue "ce";
15	ncSplice	exon	39535872	39535981	.	+	.	gene_id "ENSMUSG00000037386"; transcript_id "mmCircRNA-313"; exon_number "2" gene_name "Rims2"; gene_biotype "protein_coding"; oId "ce:circRims2-1774-001"; tissue "ce";
15	ncSplice	exon	39566943	39567043	.	+	.	gene_id "ENSMUSG00000037386"; transcript_id "mmCircRNA-313"; exon_number "3" gene_name "Rims2"; gene_biotype "protein_coding"; oId "ce:circRims2-1774-001"; tissue "ce";
15	ncSplice	exon	39585590	39585762	.	+	.	gene_id "ENSMUSG00000037386"; transcript_id "mmCircRNA-313"; exon_number "4" gene_name "Rims2"; gene_biotype "protein_coding"; oId "ce:circRims2-1774-001"; tissue "ce";
15	ncSplice	gene	39534838	39616510	.	+	.	gene_id "ENSMUSG00000037386"; gene_name "Rims2"; gene_source "ncSplice"; gene_biotype "protein_coding";
15	ncSplice	transcript	39534838	39616510	.	+	.	gene_id "ENSMUSG00000037386"; transcript_id "mmCircRNA-314"; gene_name "Rims2"; gene_biotype "protein_coding"; transcript_biotype "circRNA"; oId "ce:circRims2-1775-001"; tissue "ce";
15	ncSplice	exon	39534838	39535017	.	+	.	gene_id "ENSMUSG00000037386"; transcript_id "mmCircRNA-314"; exon_number "1" gene_name "Rims2"; gene_biotype "protein_coding"; oId "ce:circRims2-1775-001"; tissue "ce";
15	ncSplice	exon	39535872	39535981	.	+	.	gene_id "ENSMUSG00000037386"; transcript_id "mmCircRNA-314"; exon_number "2" gene_name "Rims2"; gene_biotype "protein_coding"; oId "ce:circRims2-1775-001"; tissue "ce";
15	ncSplice	exon	39566943	39567043	.	+	.	gene_id "ENSMUSG00000037386"; transcript_id "mmCircRNA-314"; exon_number "3" gene_name "Rims2"; gene_biotype "protein_coding"; oId "ce:circRims2-1775-001"; tissue "ce";
15	ncSplice	exon	39585590	39585762	.	+	.	gene_id "ENSMUSG00000037386"; transcript_id "mmCircRNA-314"; exon_number "4" gene_name "Rims2"; gene_biotype "protein_coding"; oId "ce:circRims2-1775-001"; tissue "ce";
15	ncSplice	exon	39616269	39616510	.	+	.	gene_id "ENSMUSG00000037386"; transcript_id "mmCircRNA-314"; exon_number "5" gene_name "Rims2"; gene_biotype "protein_coding"; oId "ce:circRims2-1775-001"; tissue "ce";
15	ncSplice	gene	39555068	39616510	.	+	.	gene_id "ENSMUSG00000037386"; gene_name "Rims2"; gene_source "ncSplice"; gene_biotype "protein_coding";
15	ncSplice	transcript	39555068	39616510	.	+	.	gene_id "ENSMUSG00000037386"; transcript_id "mmCircRNA-315"; gene_name "Rims2"; gene_biotype "protein_coding"; transcript_biotype "circRNA"; oId "ce:circRims2-1777-001"; tissue "ce";
15	ncSplice	exon	39555068	39555097	.	+	.	gene_id "ENSMUSG00000037386"; transcript_id "mmCircRNA-315"; exon_number "1" gene_name "Rims2"; gene_biotype "protein_coding"; oId "ce:circRims2-1777-001"; tissue "ce";
15	ncSplice	exon	39566943	39567043	.	+	.	gene_id "ENSMUSG00000037386"; transcript_id "mmCircRNA-315"; exon_number "2" gene_name "Rims2"; gene_biotype "protein_coding"; oId "ce:circRims2-1777-001"; tissue "ce";
15	ncSplice	exon	39585590	39585762	.	+	.	gene_id "ENSMUSG00000037386"; transcript_id "mmCircRNA-315"; exon_number "3" gene_name "Rims2"; gene_biotype "protein_coding"; oId "ce:circRims2-1777-001"; tissue "ce";
15	ncSplice	exon	39616269	39616510	.	+	.	gene_id "ENSMUSG00000037386"; transcript_id "mmCircRNA-315"; exon_number "4" gene_name "Rims2"; gene_biotype "protein_coding"; oId "ce:circRims2-1777-001"; tissue "ce";
15	ncSplice	gene	39566943	39585762	.	+	.	gene_id "ENSMUSG00000037386"; gene_name "Rims2"; gene_source "ncSplice"; gene_biotype "protein_coding";
15	ncSplice	transcript	39566943	39585762	.	+	.	gene_id "ENSMUSG00000037386"; transcript_id "mmCircRNA-316"; gene_name "Rims2"; gene_biotype "protein_coding"; transcript_biotype "circRNA"; oId "ce:circRims2-1778-001"; tissue "ce";
15	ncSplice	exon	39566943	39567043	.	+	.	gene_id "ENSMUSG00000037386"; transcript_id "mmCircRNA-316"; exon_number "1" gene_name "Rims2"; gene_biotype "protein_coding"; oId "ce:circRims2-1778-001"; tissue "ce";
15	ncSplice	exon	39585590	39585762	.	+	.	gene_id "ENSMUSG00000037386"; transcript_id "mmCircRNA-316"; exon_number "2" gene_name "Rims2"; gene_biotype "protein_coding"; oId "ce:circRims2-1778-001"; tissue "ce";
15	ncSplice	gene	39566943	39616510	.	+	.	gene_id "ENSMUSG00000037386"; gene_name "Rims2"; gene_source "ncSplice"; gene_biotype "protein_coding";
15	ncSplice	transcript	39566943	39616510	.	+	.	gene_id "ENSMUSG00000037386"; transcript_id "mmCircRNA-317"; gene_name "Rims2"; gene_biotype "protein_coding"; transcript_biotype "circRNA"; oId "ce:circRims2-1779-001|ts:circRims2-1429-002"; tissue "ce|ts";
15	ncSplice	exon	39566943	39567043	.	+	.	gene_id "ENSMUSG00000037386"; transcript_id "mmCircRNA-317"; exon_number "1" gene_name "Rims2"; gene_biotype "protein_coding"; oId "ce:circRims2-1779-001|ts:circRims2-1429-002"; tissue "ce|ts";
[truncated: 6,834 more rows]
