# Supplementary material for: Circular RNA repertoires are associated with evolutionarily young transposable elements
Source: eLife. 2021 Sep 20;10:e67991. doi: 10.7554/eLife.67991 (PMC8516420; doi:10.7554/eLife.67991)
Supplement: Supplementary file 14. — A gtf-file with all circRNA transcripts including the transcript and exon coordinates. [file elife-67991-supp14.gtf]

10	ncSplice	gene	3454334	3459252	.	+	.	gene_id "ENSRNOG00000002452"; gene_name "Txndc11"; gene_source "ncSplice"; gene_biotype "protein_coding";
10	ncSplice	transcript	3454334	3459252	.	+	.	gene_id "ENSRNOG00000002452"; transcript_id "rnCircRNA-1"; gene_name "Txndc11"; gene_biotype "protein_coding"; transcript_biotype "circRNA"; oId "lv:circTxndc11-17-001|ce:circTxndc11-78-001|ts:circTxndc11-132-001"; tissue "lv|ce|ts";
10	ncSplice	exon	3454334	3454476	.	+	.	gene_id "ENSRNOG00000002452"; transcript_id "rnCircRNA-1"; exon_number "1" gene_name "Txndc11"; gene_biotype "protein_coding"; oId "lv:circTxndc11-17-001|ce:circTxndc11-78-001|ts:circTxndc11-132-001"; tissue "lv|ce|ts";
10	ncSplice	exon	3455015	3455124	.	+	.	gene_id "ENSRNOG00000002452"; transcript_id "rnCircRNA-1"; exon_number "2" gene_name "Txndc11"; gene_biotype "protein_coding"; oId "lv:circTxndc11-17-001|ce:circTxndc11-78-001|ts:circTxndc11-132-001"; tissue "lv|ce|ts";
10	ncSplice	exon	3459172	3459252	.	+	.	gene_id "ENSRNOG00000002452"; transcript_id "rnCircRNA-1"; exon_number "3" gene_name "Txndc11"; gene_biotype "protein_coding"; oId "lv:circTxndc11-17-001|ce:circTxndc11-78-001|ts:circTxndc11-132-001"; tissue "lv|ce|ts";
10	ncSplice	gene	71428193	71432108	.	+	.	gene_id "10:71428192:71432108:1"; gene_name "10:71428192:71432108:1"; gene_source "ncSplice"; gene_biotype "novel";
10	ncSplice	transcript	71428193	71432108	.	+	.	gene_id "10:71428192:71432108:1"; transcript_id "rnCircRNA-2"; gene_name "10:71428192:71432108:1"; gene_biotype "novel"; transcript_biotype "circRNA"; oId "lv:circ10:71428192:71432108:1-53-001"; tissue "lv";
10	ncSplice	exon	71428193	71429642	.	+	.	gene_id "10:71428192:71432108:1"; transcript_id "rnCircRNA-2"; exon_number "1" gene_name "10:71428192:71432108:1"; gene_biotype "novel"; oId "lv:circ10:71428192:71432108:1-53-001"; tissue "lv";
10	ncSplice	exon	71431859	71432108	.	+	.	gene_id "10:71428192:71432108:1"; transcript_id "rnCircRNA-2"; exon_number "2" gene_name "10:71428192:71432108:1"; gene_biotype "novel"; oId "lv:circ10:71428192:71432108:1-53-001"; tissue "lv";
10	ncSplice	gene	94363702	94365162	.	-	.	gene_id "ENSRNOG00000012864"; gene_name "Ern1"; gene_source "ncSplice"; gene_biotype "protein_coding";
10	ncSplice	transcript	94363702	94365162	.	-	.	gene_id "ENSRNOG00000012864"; transcript_id "rnCircRNA-3"; gene_name "Ern1"; gene_biotype "protein_coding"; transcript_biotype "circRNA"; oId "lv:circErn1-81-001|ts:circErn1-545-001"; tissue "lv|ts";
10	ncSplice	exon	94363702	94363963	.	-	.	gene_id "ENSRNOG00000012864"; transcript_id "rnCircRNA-3"; exon_number "1" gene_name "Ern1"; gene_biotype "protein_coding"; oId "lv:circErn1-81-001|ts:circErn1-545-001"; tissue "lv|ts";
10	ncSplice	exon	94365061	94365162	.	-	.	gene_id "ENSRNOG00000012864"; transcript_id "rnCircRNA-3"; exon_number "2" gene_name "Ern1"; gene_biotype "protein_coding"; oId "lv:circErn1-81-001|ts:circErn1-545-001"; tissue "lv|ts";
11	ncSplice	gene	38081033	38086743	.	-	.	gene_id "ENSRNOG00000001686"; gene_name "Hlcs"; gene_source "ncSplice"; gene_biotype "protein_coding";
11	ncSplice	transcript	38081033	38086743	.	-	.	gene_id "ENSRNOG00000001686"; transcript_id "rnCircRNA-4"; gene_name "Hlcs"; gene_biotype "protein_coding"; transcript_biotype "circRNA"; oId "lv:circHlcs-105-002|ce:circHlcs-398-001|ts:circHlcs-695-004"; tissue "lv|ce|ts";
11	ncSplice	exon	38081033	38081215	.	-	.	gene_id "ENSRNOG00000001686"; transcript_id "rnCircRNA-4"; exon_number "1" gene_name "Hlcs"; gene_biotype "protein_coding"; oId "lv:circHlcs-105-002|ce:circHlcs-398-001|ts:circHlcs-695-004"; tissue "lv|ce|ts";
11	ncSplice	exon	38085410	38086344	.	-	.	gene_id "ENSRNOG00000001686"; transcript_id "rnCircRNA-4"; exon_number "2" gene_name "Hlcs"; gene_biotype "protein_coding"; oId "lv:circHlcs-105-002|ce:circHlcs-398-001|ts:circHlcs-695-004"; tissue "lv|ce|ts";
11	ncSplice	exon	38086581	38086743	.	-	.	gene_id "ENSRNOG00000001686"; transcript_id "rnCircRNA-4"; exon_number "3" gene_name "Hlcs"; gene_biotype "protein_coding"; oId "lv:circHlcs-105-002|ce:circHlcs-398-001|ts:circHlcs-695-004"; tissue "lv|ce|ts";
11	ncSplice	gene	38199286	38201886	.	+	.	gene_id "ENSRNOG00000001682"; gene_name "Ttc3"; gene_source "ncSplice"; gene_biotype "protein_coding";
11	ncSplice	transcript	38199286	38201886	.	+	.	gene_id "ENSRNOG00000001682"; transcript_id "rnCircRNA-5"; gene_name "Ttc3"; gene_biotype "protein_coding"; transcript_biotype "circRNA"; oId "lv:circTtc3-106-001|ts:circTtc3-697-001"; tissue "lv|ts";
11	ncSplice	exon	38199286	38199471	.	+	.	gene_id "ENSRNOG00000001682"; transcript_id "rnCircRNA-5"; exon_number "1" gene_name "Ttc3"; gene_biotype "protein_coding"; oId "lv:circTtc3-106-001|ts:circTtc3-697-001"; tissue "lv|ts";
11	ncSplice	exon	38200374	38200528	.	+	.	gene_id "ENSRNOG00000001682"; transcript_id "rnCircRNA-5"; exon_number "2" gene_name "Ttc3"; gene_biotype "protein_coding"; oId "lv:circTtc3-106-001|ts:circTtc3-697-001"; tissue "lv|ts";
11	ncSplice	exon	38200807	38200849	.	+	.	gene_id "ENSRNOG00000001682"; transcript_id "rnCircRNA-5"; exon_number "3" gene_name "Ttc3"; gene_biotype "protein_coding"; oId "lv:circTtc3-106-001|ts:circTtc3-697-001"; tissue "lv|ts";
11	ncSplice	exon	38201246	38201396	.	+	.	gene_id "ENSRNOG00000001682"; transcript_id "rnCircRNA-5"; exon_number "4" gene_name "Ttc3"; gene_biotype "protein_coding"; oId "lv:circTtc3-106-001|ts:circTtc3-697-001"; tissue "lv|ts";
11	ncSplice	exon	38201799	38201886	.	+	.	gene_id "ENSRNOG00000001682"; transcript_id "rnCircRNA-5"; exon_number "5" gene_name "Ttc3"; gene_biotype "protein_coding"; oId "lv:circTtc3-106-001|ts:circTtc3-697-001"; tissue "lv|ts";
11	ncSplice	gene	38200374	38201886	.	+	.	gene_id "ENSRNOG00000001682"; gene_name "Ttc3"; gene_source "ncSplice"; gene_biotype "protein_coding";
11	ncSplice	transcript	38200374	38201886	.	+	.	gene_id "ENSRNOG00000001682"; transcript_id "rnCircRNA-6"; gene_name "Ttc3"; gene_biotype "protein_coding"; transcript_biotype "circRNA"; oId "lv:circTtc3-107-001|ce:circTtc3-401-001|ts:circTtc3-698-001"; tissue "lv|ce|ts";
11	ncSplice	exon	38200374	38200528	.	+	.	gene_id "ENSRNOG00000001682"; transcript_id "rnCircRNA-6"; exon_number "1" gene_name "Ttc3"; gene_biotype "protein_coding"; oId "lv:circTtc3-107-001|ce:circTtc3-401-001|ts:circTtc3-698-001"; tissue "lv|ce|ts";
11	ncSplice	exon	38200807	38200849	.	+	.	gene_id "ENSRNOG00000001682"; transcript_id "rnCircRNA-6"; exon_number "2" gene_name "Ttc3"; gene_biotype "protein_coding"; oId "lv:circTtc3-107-001|ce:circTtc3-401-001|ts:circTtc3-698-001"; tissue "lv|ce|ts";
11	ncSplice	exon	38201246	38201396	.	+	.	gene_id "ENSRNOG00000001682"; transcript_id "rnCircRNA-6"; exon_number "3" gene_name "Ttc3"; gene_biotype "protein_coding"; oId "lv:circTtc3-107-001|ce:circTtc3-401-001|ts:circTtc3-698-001"; tissue "lv|ce|ts";
11	ncSplice	exon	38201799	38201886	.	+	.	gene_id "ENSRNOG00000001682"; transcript_id "rnCircRNA-6"; exon_number "4" gene_name "Ttc3"; gene_biotype "protein_coding"; oId "lv:circTtc3-107-001|ce:circTtc3-401-001|ts:circTtc3-698-001"; tissue "lv|ce|ts";
1	ncSplice	gene	145100676	145109380	.	+	.	gene_id "ENSRNOG00000019776"; gene_name "Sh3gl3"; gene_source "ncSplice"; gene_biotype "protein_coding";
1	ncSplice	transcript	145100676	145109380	.	+	.	gene_id "ENSRNOG00000019776"; transcript_id "rnCircRNA-7"; gene_name "Sh3gl3"; gene_biotype "protein_coding"; transcript_biotype "circRNA"; oId "lv:circSh3gl3-125-001"; tissue "lv";
1	ncSplice	exon	145100676	145100834	.	+	.	gene_id "ENSRNOG00000019776"; transcript_id "rnCircRNA-7"; exon_number "1" gene_name "Sh3gl3"; gene_biotype "protein_coding"; oId "lv:circSh3gl3-125-001"; tissue "lv";
1	ncSplice	exon	145108145	145108248	.	+	.	gene_id "ENSRNOG00000019776"; transcript_id "rnCircRNA-7"; exon_number "2" gene_name "Sh3gl3"; gene_biotype "protein_coding"; oId "lv:circSh3gl3-125-001"; tissue "lv";
1	ncSplice	exon	145109291	145109380	.	+	.	gene_id "ENSRNOG00000019776"; transcript_id "rnCircRNA-7"; exon_number "3" gene_name "Sh3gl3"; gene_biotype "protein_coding"; oId "lv:circSh3gl3-125-001"; tissue "lv";
1	ncSplice	gene	153980837	154018756	.	+	.	gene_id "ENSRNOG00000024016"; gene_name "Cyp2c6v1"; gene_source "ncSplice"; gene_biotype "protein_coding";
1	ncSplice	transcript	153980837	154018756	.	+	.	gene_id "ENSRNOG00000024016"; transcript_id "rnCircRNA-8"; gene_name "Cyp2c6v1"; gene_biotype "protein_coding"; transcript_biotype "circRNA"; oId "lv:circCyp2c6v1-133-001"; tissue "lv";
1	ncSplice	exon	153980837	154016622	.	+	.	gene_id "ENSRNOG00000024016"; transcript_id "rnCircRNA-8"; exon_number "1" gene_name "Cyp2c6v1"; gene_biotype "protein_coding"; oId "lv:circCyp2c6v1-133-001"; tissue "lv";
1	ncSplice	exon	154017687	154018756	.	+	.	gene_id "ENSRNOG00000024016"; transcript_id "rnCircRNA-8"; exon_number "2" gene_name "Cyp2c6v1"; gene_biotype "protein_coding"; oId "lv:circCyp2c6v1-133-001"; tissue "lv";
1	ncSplice	gene	153980837	154057467	.	+	.	gene_id "ENSRNOG00000024016"; gene_name "Cyp2c6v1"; gene_source "ncSplice"; gene_biotype "protein_coding";
1	ncSplice	transcript	153980837	154057467	.	+	.	gene_id "ENSRNOG00000024016"; transcript_id "rnCircRNA-9"; gene_name "Cyp2c6v1"; gene_biotype "protein_coding"; transcript_biotype "circRNA"; oId "lv:circCyp2c6v1-134-001"; tissue "lv";
1	ncSplice	exon	153980837	154016622	.	+	.	gene_id "ENSRNOG00000024016"; transcript_id "rnCircRNA-9"; exon_number "1" gene_name "Cyp2c6v1"; gene_biotype "protein_coding"; oId "lv:circCyp2c6v1-134-001"; tissue "lv";
1	ncSplice	exon	154017687	154055330	.	+	.	gene_id "ENSRNOG00000024016"; transcript_id "rnCircRNA-9"; exon_number "2" gene_name "Cyp2c6v1"; gene_biotype "protein_coding"; oId "lv:circCyp2c6v1-134-001"; tissue "lv";
1	ncSplice	exon	154056399	154057467	.	+	.	gene_id "ENSRNOG00000024016"; transcript_id "rnCircRNA-9"; exon_number "3" gene_name "Cyp2c6v1"; gene_biotype "protein_coding"; oId "lv:circCyp2c6v1-134-001"; tissue "lv";
1	ncSplice	gene	154373487	154396983	.	-	.	gene_id "ENSRNOG00000021405"; gene_name "LOC100361547"; gene_source "ncSplice"; gene_biotype "protein_coding";
1	ncSplice	transcript	154373487	154396983	.	-	.	gene_id "ENSRNOG00000021405"; transcript_id "rnCircRNA-10"; gene_name "LOC100361547"; gene_biotype "protein_coding"; transcript_biotype "circRNA"; oId "lv:circLOC100361547-138-002"; tissue "lv";
1	ncSplice	exon	154373487	154373628	.	-	.	gene_id "ENSRNOG00000021405"; transcript_id "rnCircRNA-10"; exon_number "1" gene_name "LOC100361547"; gene_biotype "protein_coding"; oId "lv:circLOC100361547-138-002"; tissue "lv";
1	ncSplice	exon	154383443	154387011	.	-	.	gene_id "ENSRNOG00000021405"; transcript_id "rnCircRNA-10"; exon_number "2" gene_name "LOC100361547"; gene_biotype "protein_coding"; oId "lv:circLOC100361547-138-002"; tissue "lv";
1	ncSplice	exon	154388830	154388990	.	-	.	gene_id "ENSRNOG00000021405"; transcript_id "rnCircRNA-10"; exon_number "3" gene_name "LOC100361547"; gene_biotype "protein_coding"; oId "lv:circLOC100361547-138-002"; tissue "lv";
1	ncSplice	exon	154396506	154396655	.	-	.	gene_id "ENSRNOG00000021405"; transcript_id "rnCircRNA-10"; exon_number "4" gene_name "LOC100361547"; gene_biotype "protein_coding"; oId "lv:circLOC100361547-138-002"; tissue "lv";
1	ncSplice	exon	154396821	154396983	.	-	.	gene_id "ENSRNOG00000021405"; transcript_id "rnCircRNA-10"; exon_number "5" gene_name "LOC100361547"; gene_biotype "protein_coding"; oId "lv:circLOC100361547-138-002"; tissue "lv";
1	ncSplice	gene	171134017	171149410	.	-	.	gene_id "ENSRNOG00000026408"; gene_name "LOC683565"; gene_source "ncSplice"; gene_biotype "protein_coding";
1	ncSplice	transcript	171134017	171149410	.	-	.	gene_id "ENSRNOG00000026408"; transcript_id "rnCircRNA-11"; gene_name "LOC683565"; gene_biotype "protein_coding"; transcript_biotype "circRNA"; oId "lv:circLOC683565-161-001|ce:circLOC683565-513-001"; tissue "lv|ce";
1	ncSplice	exon	171134017	171134135	.	-	.	gene_id "ENSRNOG00000026408"; transcript_id "rnCircRNA-11"; exon_number "1" gene_name "LOC683565"; gene_biotype "protein_coding"; oId "lv:circLOC683565-161-001|ce:circLOC683565-513-001"; tissue "lv|ce";
1	ncSplice	exon	171138582	171138728	.	-	.	gene_id "ENSRNOG00000026408"; transcript_id "rnCircRNA-11"; exon_number "2" gene_name "LOC683565"; gene_biotype "protein_coding"; oId "lv:circLOC683565-161-001|ce:circLOC683565-513-001"; tissue "lv|ce";
1	ncSplice	exon	171149337	171149410	.	-	.	gene_id "ENSRNOG00000026408"; transcript_id "rnCircRNA-11"; exon_number "3" gene_name "LOC683565"; gene_biotype "protein_coding"; oId "lv:circLOC683565-161-001|ce:circLOC683565-513-001"; tissue "lv|ce";
11	ncSplice	gene	92231353	92236376	.	-	.	gene_id "ENSRNOG00000037851"; gene_name "Spidr"; gene_source "ncSplice"; gene_biotype "protein_coding";
11	ncSplice	transcript	92231353	92236376	.	-	.	gene_id "ENSRNOG00000037851"; transcript_id "rnCircRNA-12"; gene_name "Spidr"; gene_biotype "protein_coding"; transcript_biotype "circRNA"; oId "lv:circSpidr-190-002|ce:circSpidr-610-001|ts:circSpidr-1057-002"; tissue "lv|ce|ts";
11	ncSplice	exon	92231353	92231453	.	-	.	gene_id "ENSRNOG00000037851"; transcript_id "rnCircRNA-12"; exon_number "1" gene_name "Spidr"; gene_biotype "protein_coding"; oId "lv:circSpidr-190-002|ce:circSpidr-610-001|ts:circSpidr-1057-002"; tissue "lv|ce|ts";
11	ncSplice	exon	92236123	92236376	.	-	.	gene_id "ENSRNOG00000037851"; transcript_id "rnCircRNA-12"; exon_number "2" gene_name "Spidr"; gene_biotype "protein_coding"; oId "lv:circSpidr-190-002|ce:circSpidr-610-001|ts:circSpidr-1057-002"; tissue "lv|ce|ts";
1	ncSplice	gene	208556405	208557071	.	+	.	gene_id "ENSRNOG00000020533"; gene_name "Htra1"; gene_source "ncSplice"; gene_biotype "protein_coding";
1	ncSplice	transcript	208556405	208557071	.	+	.	gene_id "ENSRNOG00000020533"; transcript_id "rnCircRNA-13"; gene_name "Htra1"; gene_biotype "protein_coding"; transcript_biotype "circRNA"; oId "lv:circHtra1-205-001"; tissue "lv";
1	ncSplice	exon	208556405	208556504	.	+	.	gene_id "ENSRNOG00000020533"; transcript_id "rnCircRNA-13"; exon_number "1" gene_name "Htra1"; gene_biotype "protein_coding"; oId "lv:circHtra1-205-001"; tissue "lv";
1	ncSplice	exon	208556867	208557071	.	+	.	gene_id "ENSRNOG00000020533"; transcript_id "rnCircRNA-13"; exon_number "2" gene_name "Htra1"; gene_biotype "protein_coding"; oId "lv:circHtra1-205-001"; tissue "lv";
1	ncSplice	gene	211951683	211954201	.	+	.	gene_id "ENSRNOG00000017294"; gene_name "Zranb1"; gene_source "ncSplice"; gene_biotype "protein_coding";
1	ncSplice	transcript	211951683	211954201	.	+	.	gene_id "ENSRNOG00000017294"; transcript_id "rnCircRNA-14"; gene_name "Zranb1"; gene_biotype "protein_coding"; transcript_biotype "circRNA"; oId "lv:circZranb1-210-001|ts:circZranb1-1201-001"; tissue "lv|ts";
1	ncSplice	exon	211951683	211951847	.	+	.	gene_id "ENSRNOG00000017294"; transcript_id "rnCircRNA-14"; exon_number "1" gene_name "Zranb1"; gene_biotype "protein_coding"; oId "lv:circZranb1-210-001|ts:circZranb1-1201-001"; tissue "lv|ts";
1	ncSplice	exon	211953351	211954201	.	+	.	gene_id "ENSRNOG00000017294"; transcript_id "rnCircRNA-14"; exon_number "2" gene_name "Zranb1"; gene_biotype "protein_coding"; oId "lv:circZranb1-210-001|ts:circZranb1-1201-001"; tissue "lv|ts";
12	ncSplice	gene	12629815	12636941	.	-	.	gene_id "ENSRNOG00000039819"; gene_name "Cdk8"; gene_source "ncSplice"; gene_biotype "protein_coding";
12	ncSplice	transcript	12629815	12636941	.	-	.	gene_id "ENSRNOG00000039819"; transcript_id "rnCircRNA-15"; gene_name "Cdk8"; gene_biotype "protein_coding"; transcript_biotype "circRNA"; oId "lv:circCdk8-213-001|ce:circCdk8-699-001"; tissue "lv|ce";
12	ncSplice	exon	12629815	12629955	.	-	.	gene_id "ENSRNOG00000039819"; transcript_id "rnCircRNA-15"; exon_number "1" gene_name "Cdk8"; gene_biotype "protein_coding"; oId "lv:circCdk8-213-001|ce:circCdk8-699-001"; tissue "lv|ce";
12	ncSplice	exon	12633193	12633303	.	-	.	gene_id "ENSRNOG00000039819"; transcript_id "rnCircRNA-15"; exon_number "2" gene_name "Cdk8"; gene_biotype "protein_coding"; oId "lv:circCdk8-213-001|ce:circCdk8-699-001"; tissue "lv|ce";
12	ncSplice	exon	12636866	12636941	.	-	.	gene_id "ENSRNOG00000039819"; transcript_id "rnCircRNA-15"; exon_number "3" gene_name "Cdk8"; gene_biotype "protein_coding"; oId "lv:circCdk8-213-001|ce:circCdk8-699-001"; tissue "lv|ce";
12	ncSplice	gene	13731098	13785597	.	-	.	gene_id "ENSRNOG00000000978"; gene_name "Cyp3a2"; gene_source "ncSplice"; gene_biotype "processed_transcript";
12	ncSplice	transcript	13731098	13785597	.	-	.	gene_id "ENSRNOG00000000978"; transcript_id "rnCircRNA-16"; gene_name "Cyp3a2"; gene_biotype "processed_transcript"; transcript_biotype "circRNA"; oId "lv:circCyp3a2-214-001"; tissue "lv";
12	ncSplice	exon	13731098	13731379	.	-	.	gene_id "ENSRNOG00000000978"; transcript_id "rnCircRNA-16"; exon_number "1" gene_name "Cyp3a2"; gene_biotype "processed_transcript"; oId "lv:circCyp3a2-214-001"; tissue "lv";
12	ncSplice	exon	13774066	13785597	.	-	.	gene_id "ENSRNOG00000000978"; transcript_id "rnCircRNA-16"; exon_number "2" gene_name "Cyp3a2"; gene_biotype "processed_transcript"; oId "lv:circCyp3a2-214-001"; tissue "lv";
1	ncSplice	gene	222802618	222811921	.	-	.	gene_id "1:222802617:222811921:-1"; gene_name "1:222802617:222811921:-1"; gene_source "ncSplice"; gene_biotype "novel";
1	ncSplice	transcript	222802618	222811921	.	-	.	gene_id "1:222802617:222811921:-1"; transcript_id "rnCircRNA-17"; gene_name "1:222802617:222811921:-1"; gene_biotype "novel"; transcript_biotype "circRNA"; oId "lv:circ1:222802617:222811921:-1-224-001"; tissue "lv";
1	ncSplice	exon	222802618	222803232	.	-	.	gene_id "1:222802617:222811921:-1"; transcript_id "rnCircRNA-17"; exon_number "1" gene_name "1:222802617:222811921:-1"; gene_biotype "novel"; oId "lv:circ1:222802617:222811921:-1-224-001"; tissue "lv";
1	ncSplice	exon	222804741	222804963	.	-	.	gene_id "1:222802617:222811921:-1"; transcript_id "rnCircRNA-17"; exon_number "2" gene_name "1:222802617:222811921:-1"; gene_biotype "novel"; oId "lv:circ1:222802617:222811921:-1-224-001"; tissue "lv";
1	ncSplice	exon	222806965	222806964	.	-	.	gene_id "1:222802617:222811921:-1"; transcript_id "rnCircRNA-17"; exon_number "3" gene_name "1:222802617:222811921:-1"; gene_biotype "novel"; oId "lv:circ1:222802617:222811921:-1-224-001"; tissue "lv";
1	ncSplice	exon	222810498	222811921	.	-	.	gene_id "1:222802617:222811921:-1"; transcript_id "rnCircRNA-17"; exon_number "4" gene_name "1:222802617:222811921:-1"; gene_biotype "novel"; oId "lv:circ1:222802617:222811921:-1-224-001"; tissue "lv";
1	ncSplice	gene	222802618	222828466	.	-	.	gene_id "1:222802617:222828466:-1"; gene_name "1:222802617:222828466:-1"; gene_source "ncSplice"; gene_biotype "novel";
1	ncSplice	transcript	222802618	222828466	.	-	.	gene_id "1:222802617:222828466:-1"; transcript_id "rnCircRNA-18"; gene_name "1:222802617:222828466:-1"; gene_biotype "novel"; transcript_biotype "circRNA"; oId "lv:circ1:222802617:222828466:-1-225-001"; tissue "lv";
1	ncSplice	exon	222802618	222803232	.	-	.	gene_id "1:222802617:222828466:-1"; transcript_id "rnCircRNA-18"; exon_number "1" gene_name "1:222802617:222828466:-1"; gene_biotype "novel"; oId "lv:circ1:222802617:222828466:-1-225-001"; tissue "lv";
1	ncSplice	exon	222804741	222804963	.	-	.	gene_id "1:222802617:222828466:-1"; transcript_id "rnCircRNA-18"; exon_number "2" gene_name "1:222802617:222828466:-1"; gene_biotype "novel"; oId "lv:circ1:222802617:222828466:-1-225-001"; tissue "lv";
1	ncSplice	exon	222806965	222807096	.	-	.	gene_id "1:222802617:222828466:-1"; transcript_id "rnCircRNA-18"; exon_number "3" gene_name "1:222802617:222828466:-1"; gene_biotype "novel"; oId "lv:circ1:222802617:222828466:-1-225-001"; tissue "lv";
1	ncSplice	exon	222808603	222810378	.	-	.	gene_id "1:222802617:222828466:-1"; transcript_id "rnCircRNA-18"; exon_number "4" gene_name "1:222802617:222828466:-1"; gene_biotype "novel"; oId "lv:circ1:222802617:222828466:-1-225-001"; tissue "lv";
1	ncSplice	exon	222812407	222828466	.	-	.	gene_id "1:222802617:222828466:-1"; transcript_id "rnCircRNA-18"; exon_number "5" gene_name "1:222802617:222828466:-1"; gene_biotype "novel"; oId "lv:circ1:222802617:222828466:-1-225-001"; tissue "lv";
12	ncSplice	gene	27441036	27445459	.	+	.	gene_id "ENSRNOG00000001479"; gene_name "Gtf2i"; gene_source "ncSplice"; gene_biotype "protein_coding";
12	ncSplice	transcript	27441036	27445459	.	+	.	gene_id "ENSRNOG00000001479"; transcript_id "rnCircRNA-19"; gene_name "Gtf2i"; gene_biotype "protein_coding"; transcript_biotype "circRNA"; oId "lv:circGtf2i-242-003|ce:circGtf2i-764-001|ts:circGtf2i-1472-005"; tissue "lv|ce|ts";
12	ncSplice	exon	27441036	27441174	.	+	.	gene_id "ENSRNOG00000001479"; transcript_id "rnCircRNA-19"; exon_number "1" gene_name "Gtf2i"; gene_biotype "protein_coding"; oId "lv:circGtf2i-242-003|ce:circGtf2i-764-001|ts:circGtf2i-1472-005"; tissue "lv|ce|ts";
12	ncSplice	exon	27445325	27445459	.	+	.	gene_id "ENSRNOG00000001479"; transcript_id "rnCircRNA-19"; exon_number "2" gene_name "Gtf2i"; gene_biotype "protein_coding"; oId "lv:circGtf2i-242-003|ce:circGtf2i-764-001|ts:circGtf2i-1472-005"; tissue "lv|ce|ts";
12	ncSplice	gene	31923241	31926341	.	-	.	gene_id "ENSRNOG00000000895"; gene_name "Rabgef1"; gene_source "ncSplice"; gene_biotype "protein_coding";
12	ncSplice	transcript	31923241	31926341	.	-	.	gene_id "ENSRNOG00000000895"; transcript_id "rnCircRNA-20"; gene_name "Rabgef1"; gene_biotype "protein_coding"; transcript_biotype "circRNA"; oId "lv:circRabgef1-246-001|ce:circRabgef1-776-001"; tissue "lv|ce";
12	ncSplice	exon	31923241	31923407	.	-	.	gene_id "ENSRNOG00000000895"; transcript_id "rnCircRNA-20"; exon_number "1" gene_name "Rabgef1"; gene_biotype "protein_coding"; oId "lv:circRabgef1-246-001|ce:circRabgef1-776-001"; tissue "lv|ce";
12	ncSplice	exon	31926156	31926341	.	-	.	gene_id "ENSRNOG00000000895"; transcript_id "rnCircRNA-20"; exon_number "2" gene_name "Rabgef1"; gene_biotype "protein_coding"; oId "lv:circRabgef1-246-001|ce:circRabgef1-776-001"; tissue "lv|ce";
12	ncSplice	gene	42200429	42203346	.	-	.	gene_id "ENSRNOG00000001256"; gene_name "Atxn2"; gene_source "ncSplice"; gene_biotype "protein_coding";
12	ncSplice	transcript	42200429	42203346	.	-	.	gene_id "ENSRNOG00000001256"; transcript_id "rnCircRNA-21"; gene_name "Atxn2"; gene_biotype "protein_coding"; transcript_biotype "circRNA"; oId "lv:circAtxn2-257-001|ce:circAtxn2-815-001|ts:circAtxn2-1565-001"; tissue "lv|ce|ts";
12	ncSplice	exon	42200429	42200579	.	-	.	gene_id "ENSRNOG00000001256"; transcript_id "rnCircRNA-21"; exon_number "1" gene_name "Atxn2"; gene_biotype "protein_coding"; oId "lv:circAtxn2-257-001|ce:circAtxn2-815-001|ts:circAtxn2-1565-001"; tissue "lv|ce|ts";
12	ncSplice	exon	42201099	42201170	.	-	.	gene_id "ENSRNOG00000001256"; transcript_id "rnCircRNA-21"; exon_number "2" gene_name "Atxn2"; gene_biotype "protein_coding"; oId "lv:circAtxn2-257-001|ce:circAtxn2-815-001|ts:circAtxn2-1565-001"; tissue "lv|ce|ts";
12	ncSplice	exon	42201607	42201666	.	-	.	gene_id "ENSRNOG00000001256"; transcript_id "rnCircRNA-21"; exon_number "3" gene_name "Atxn2"; gene_biotype "protein_coding"; oId "lv:circAtxn2-257-001|ce:circAtxn2-815-001|ts:circAtxn2-1565-001"; tissue "lv|ce|ts";
12	ncSplice	exon	42203310	42203346	.	-	.	gene_id "ENSRNOG00000001256"; transcript_id "rnCircRNA-21"; exon_number "4" gene_name "Atxn2"; gene_biotype "protein_coding"; oId "lv:circAtxn2-257-001|ce:circAtxn2-815-001|ts:circAtxn2-1565-001"; tissue "lv|ce|ts";
1	ncSplice	gene	265428365	265453284	.	+	.	gene_id "ENSRNOG00000012896"; gene_name "Cyp2c11"; gene_source "ncSplice"; gene_biotype "protein_coding";
1	ncSplice	transcript	265428365	265453284	.	+	.	gene_id "ENSRNOG00000012896"; transcript_id "rnCircRNA-22"; gene_name "Cyp2c11"; gene_biotype "protein_coding"; transcript_biotype "circRNA"; oId "lv:circCyp2c11-283-001"; tissue "lv";
1	ncSplice	exon	265428365	265431704	.	+	.	gene_id "ENSRNOG00000012896"; transcript_id "rnCircRNA-22"; exon_number "1" gene_name "Cyp2c11"; gene_biotype "protein_coding"; oId "lv:circCyp2c11-283-001"; tissue "lv";
1	ncSplice	exon	265436827	265438089	.	+	.	gene_id "ENSRNOG00000012896"; transcript_id "rnCircRNA-22"; exon_number "2" gene_name "Cyp2c11"; gene_biotype "protein_coding"; oId "lv:circCyp2c11-283-001"; tissue "lv";
1	ncSplice	exon	265449605	265453284	.	+	.	gene_id "ENSRNOG00000012896"; transcript_id "rnCircRNA-22"; exon_number "3" gene_name "Cyp2c11"; gene_biotype "protein_coding"; oId "lv:circCyp2c11-283-001"; tissue "lv";
1	ncSplice	gene	284760050	284764416	.	+	.	gene_id "ENSRNOG00000016948"; gene_name "Nhlrc2"; gene_source "ncSplice"; gene_biotype "protein_coding";
1	ncSplice	transcript	284760050	284764416	.	+	.	gene_id "ENSRNOG00000016948"; transcript_id "rnCircRNA-23"; gene_name "Nhlrc2"; gene_biotype "protein_coding"; transcript_biotype "circRNA"; oId "lv:circNhlrc2-294-001"; tissue "lv";
1	ncSplice	exon	284760050	284760171	.	+	.	gene_id "ENSRNOG00000016948"; transcript_id "rnCircRNA-23"; exon_number "1" gene_name "Nhlrc2"; gene_biotype "protein_coding"; oId "lv:circNhlrc2-294-001"; tissue "lv";
1	ncSplice	exon	284764287	284764416	.	+	.	gene_id "ENSRNOG00000016948"; transcript_id "rnCircRNA-23"; exon_number "2" gene_name "Nhlrc2"; gene_biotype "protein_coding"; oId "lv:circNhlrc2-294-001"; tissue "lv";
13	ncSplice	gene	118282687	118295842	.	+	.	gene_id "13:118282686:118295842:1"; gene_name "13:118282686:118295842:1"; gene_source "ncSplice"; gene_biotype "novel";
13	ncSplice	transcript	118282687	118295842	.	+	.	gene_id "13:118282686:118295842:1"; transcript_id "rnCircRNA-24"; gene_name "13:118282686:118295842:1"; gene_biotype "novel"; transcript_biotype "circRNA"; oId "lv:circ13:118282686:118295842:1-311-001"; tissue "lv";
13	ncSplice	exon	118282687	118282843	.	+	.	gene_id "13:118282686:118295842:1"; transcript_id "rnCircRNA-24"; exon_number "1" gene_name "13:118282686:118295842:1"; gene_biotype "novel"; oId "lv:circ13:118282686:118295842:1-311-001"; tissue "lv";
13	ncSplice	exon	118295792	118295842	.	+	.	gene_id "13:118282686:118295842:1"; transcript_id "rnCircRNA-24"; exon_number "2" gene_name "13:118282686:118295842:1"; gene_biotype "novel"; oId "lv:circ13:118282686:118295842:1-311-001"; tissue "lv";
13	ncSplice	gene	62009359	62011338	.	-	.	gene_id "ENSRNOG00000030715"; gene_name "Cfh"; gene_source "ncSplice"; gene_biotype "protein_coding";
13	ncSplice	transcript	62009359	62011338	.	-	.	gene_id "ENSRNOG00000030715"; transcript_id "rnCircRNA-25"; gene_name "Cfh"; gene_biotype "protein_coding"; transcript_biotype "circRNA"; oId "lv:circCfh-323-001"; tissue "lv";
13	ncSplice	exon	62009359	62009535	.	-	.	gene_id "ENSRNOG00000030715"; transcript_id "rnCircRNA-25"; exon_number "1" gene_name "Cfh"; gene_biotype "protein_coding"; oId "lv:circCfh-323-001"; tissue "lv";
13	ncSplice	exon	62010477	62010540	.	-	.	gene_id "ENSRNOG00000030715"; transcript_id "rnCircRNA-25"; exon_number "2" gene_name "Cfh"; gene_biotype "protein_coding"; oId "lv:circCfh-323-001"; tissue "lv";
13	ncSplice	exon	62011162	62011338	.	-	.	gene_id "ENSRNOG00000030715"; transcript_id "rnCircRNA-25"; exon_number "3" gene_name "Cfh"; gene_biotype "protein_coding"; oId "lv:circCfh-323-001"; tissue "lv";
13	ncSplice	gene	62060735	62064611	.	-	.	gene_id "ENSRNOG00000030715"; gene_name "Cfh"; gene_source "ncSplice"; gene_biotype "protein_coding";
13	ncSplice	transcript	62060735	62064611	.	-	.	gene_id "ENSRNOG00000030715"; transcript_id "rnCircRNA-26"; gene_name "Cfh"; gene_biotype "protein_coding"; transcript_biotype "circRNA"; oId "lv:circCfh-324-002"; tissue "lv";
13	ncSplice	exon	62060735	62060908	.	-	.	gene_id "ENSRNOG00000030715"; transcript_id "rnCircRNA-26"; exon_number "1" gene_name "Cfh"; gene_biotype "protein_coding"; oId "lv:circCfh-324-002"; tissue "lv";
13	ncSplice	exon	62064441	62064611	.	-	.	gene_id "ENSRNOG00000030715"; transcript_id "rnCircRNA-26"; exon_number "2" gene_name "Cfh"; gene_biotype "protein_coding"; oId "lv:circCfh-324-002"; tissue "lv";
13	ncSplice	gene	78173652	78199643	.	+	.	gene_id "ENSRNOG00000003550"; gene_name "Acbd6"; gene_source "ncSplice"; gene_biotype "protein_coding";
13	ncSplice	transcript	78173652	78199643	.	+	.	gene_id "ENSRNOG00000003550"; transcript_id "rnCircRNA-27"; gene_name "Acbd6"; gene_biotype "protein_coding"; transcript_biotype "circRNA"; oId "lv:circAcbd6-329-001|ce:circAcbd6-1113-001|ts:circAcbd6-2088-009"; tissue "lv|ce|ts";
13	ncSplice	exon	78173652	78173734	.	+	.	gene_id "ENSRNOG00000003550"; transcript_id "rnCircRNA-27"; exon_number "1" gene_name "Acbd6"; gene_biotype "protein_coding"; oId "lv:circAcbd6-329-001|ce:circAcbd6-1113-001|ts:circAcbd6-2088-009"; tissue "lv|ce|ts";
13	ncSplice	exon	78189067	78189172	.	+	.	gene_id "ENSRNOG00000003550"; transcript_id "rnCircRNA-27"; exon_number "2" gene_name "Acbd6"; gene_biotype "protein_coding"; oId "lv:circAcbd6-329-001|ce:circAcbd6-1113-001|ts:circAcbd6-2088-009"; tissue "lv|ce|ts";
13	ncSplice	exon	78199554	78199643	.	+	.	gene_id "ENSRNOG00000003550"; transcript_id "rnCircRNA-27"; exon_number "3" gene_name "Acbd6"; gene_biotype "protein_coding"; oId "lv:circAcbd6-329-001|ce:circAcbd6-1113-001|ts:circAcbd6-2088-009"; tissue "lv|ce|ts";
13	ncSplice	gene	78539722	78547255	.	-	.	gene_id "ENSRNOG00000003882"; gene_name "Cep350"; gene_source "ncSplice"; gene_biotype "protein_coding";
13	ncSplice	transcript	78539722	78547255	.	-	.	gene_id "ENSRNOG00000003882"; transcript_id "rnCircRNA-28"; gene_name "Cep350"; gene_biotype "protein_coding"; transcript_biotype "circRNA"; oId "lv:circCep350-330-001|ce:circCep350-1119-001|ts:circCep350-2097-001"; tissue "lv|ce|ts";
13	ncSplice	exon	78539722	78540338	.	-	.	gene_id "ENSRNOG00000003882"; transcript_id "rnCircRNA-28"; exon_number "1" gene_name "Cep350"; gene_biotype "protein_coding"; oId "lv:circCep350-330-001|ce:circCep350-1119-001|ts:circCep350-2097-001"; tissue "lv|ce|ts";
13	ncSplice	exon	78543064	78543223	.	-	.	gene_id "ENSRNOG00000003882"; transcript_id "rnCircRNA-28"; exon_number "2" gene_name "Cep350"; gene_biotype "protein_coding"; oId "lv:circCep350-330-001|ce:circCep350-1119-001|ts:circCep350-2097-001"; tissue "lv|ce|ts";
13	ncSplice	exon	78544416	78544527	.	-	.	gene_id "ENSRNOG00000003882"; transcript_id "rnCircRNA-28"; exon_number "3" gene_name "Cep350"; gene_biotype "protein_coding"; oId "lv:circCep350-330-001|ce:circCep350-1119-001|ts:circCep350-2097-001"; tissue "lv|ce|ts";
13	ncSplice	exon	78545613	78545656	.	-	.	gene_id "ENSRNOG00000003882"; transcript_id "rnCircRNA-28"; exon_number "4" gene_name "Cep350"; gene_biotype "protein_coding"; oId "lv:circCep350-330-001|ce:circCep350-1119-001|ts:circCep350-2097-001"; tissue "lv|ce|ts";
13	ncSplice	exon	78547170	78547255	.	-	.	gene_id "ENSRNOG00000003882"; transcript_id "rnCircRNA-28"; exon_number "5" gene_name "Cep350"; gene_biotype "protein_coding"; oId "lv:circCep350-330-001|ce:circCep350-1119-001|ts:circCep350-2097-001"; tissue "lv|ce|ts";
14	ncSplice	gene	15027628	15032560	.	+	.	gene_id "ENSRNOG00000002075"; gene_name "Cnot6l"; gene_source "ncSplice"; gene_biotype "protein_coding";
14	ncSplice	transcript	15027628	15032560	.	+	.	gene_id "ENSRNOG00000002075"; transcript_id "rnCircRNA-29"; gene_name "Cnot6l"; gene_biotype "protein_coding"; transcript_biotype "circRNA"; oId "lv:circCnot6l-354-001|ce:circCnot6l-1217-001"; tissue "lv|ce";
14	ncSplice	exon	15027628	15027749	.	+	.	gene_id "ENSRNOG00000002075"; transcript_id "rnCircRNA-29"; exon_number "1" gene_name "Cnot6l"; gene_biotype "protein_coding"; oId "lv:circCnot6l-354-001|ce:circCnot6l-1217-001"; tissue "lv|ce";
14	ncSplice	exon	15030435	15030621	.	+	.	gene_id "ENSRNOG00000002075"; transcript_id "rnCircRNA-29"; exon_number "2" gene_name "Cnot6l"; gene_biotype "protein_coding"; oId "lv:circCnot6l-354-001|ce:circCnot6l-1217-001"; tissue "lv|ce";
14	ncSplice	exon	15032475	15032560	.	+	.	gene_id "ENSRNOG00000002075"; transcript_id "rnCircRNA-29"; exon_number "3" gene_name "Cnot6l"; gene_biotype "protein_coding"; oId "lv:circCnot6l-354-001|ce:circCnot6l-1217-001"; tissue "lv|ce";
14	ncSplice	gene	22478472	22479818	.	+	.	gene_id "ENSRNOG00000001980"; gene_name "Ugt2b35"; gene_source "ncSplice"; gene_biotype "protein_coding";
14	ncSplice	transcript	22478472	22479818	.	+	.	gene_id "ENSRNOG00000001980"; transcript_id "rnCircRNA-30"; gene_name "Ugt2b35"; gene_biotype "protein_coding"; transcript_biotype "circRNA"; oId "lv:circUgt2b35-359-001"; tissue "lv";
14	ncSplice	exon	22478472	22478559	.	+	.	gene_id "ENSRNOG00000001980"; transcript_id "rnCircRNA-30"; exon_number "1" gene_name "Ugt2b35"; gene_biotype "protein_coding"; oId "lv:circUgt2b35-359-001"; tissue "lv";
14	ncSplice	exon	22479599	22479818	.	+	.	gene_id "ENSRNOG00000001980"; transcript_id "rnCircRNA-30"; exon_number "2" gene_name "Ugt2b35"; gene_biotype "protein_coding"; oId "lv:circUgt2b35-359-001"; tissue "lv";
14	ncSplice	gene	2978206	3012196	.	+	.	gene_id "ENSRNOG00000002039"; gene_name "Evi5"; gene_source "ncSplice"; gene_biotype "protein_coding";
14	ncSplice	transcript	2978206	3012196	.	+	.	gene_id "ENSRNOG00000002039"; transcript_id "rnCircRNA-31"; gene_name "Evi5"; gene_biotype "protein_coding"; transcript_biotype "circRNA"; oId "lv:circEvi5-364-001"; tissue "lv";
14	ncSplice	exon	2978206	2978340	.	+	.	gene_id "ENSRNOG00000002039"; transcript_id "rnCircRNA-31"; exon_number "1" gene_name "Evi5"; gene_biotype "protein_coding"; oId "lv:circEvi5-364-001"; tissue "lv";
14	ncSplice	exon	2979476	2989350	.	+	.	gene_id "ENSRNOG00000002039"; transcript_id "rnCircRNA-31"; exon_number "2" gene_name "Evi5"; gene_biotype "protein_coding"; oId "lv:circEvi5-364-001"; tissue "lv";
14	ncSplice	exon	2991592	2991687	.	+	.	gene_id "ENSRNOG00000002039"; transcript_id "rnCircRNA-31"; exon_number "3" gene_name "Evi5"; gene_biotype "protein_coding"; oId "lv:circEvi5-364-001"; tissue "lv";
14	ncSplice	exon	2993706	3012196	.	+	.	gene_id "ENSRNOG00000002039"; transcript_id "rnCircRNA-31"; exon_number "4" gene_name "Evi5"; gene_biotype "protein_coding"; oId "lv:circEvi5-364-001"; tissue "lv";
14	ncSplice	gene	34273804	34318779	.	+	.	gene_id "ENSRNOG00000002175"; gene_name "LOC100911602"; gene_source "ncSplice"; gene_biotype "protein_coding";
14	ncSplice	transcript	34273804	34318779	.	+	.	gene_id "ENSRNOG00000002175"; transcript_id "rnCircRNA-32"; gene_name "LOC100911602"; gene_biotype "protein_coding"; transcript_biotype "circRNA"; oId "lv:circLOC100911602-365-001"; tissue "lv";
14	ncSplice	exon	34273804	34274009	.	+	.	gene_id "ENSRNOG00000002175"; transcript_id "rnCircRNA-32"; exon_number "1" gene_name "LOC100911602"; gene_biotype "protein_coding"; oId "lv:circLOC100911602-365-001"; tissue "lv";
14	ncSplice	exon	34279015	34318779	.	+	.	gene_id "ENSRNOG00000002175"; transcript_id "rnCircRNA-32"; exon_number "2" gene_name "LOC100911602"; gene_biotype "protein_coding"; oId "lv:circLOC100911602-365-001"; tissue "lv";
14	ncSplice	gene	44259814	44276270	.	+	.	gene_id "ENSRNOG00000002553"; gene_name "Smim14"; gene_source "ncSplice"; gene_biotype "protein_coding";
14	ncSplice	transcript	44259814	44276270	.	+	.	gene_id "ENSRNOG00000002553"; transcript_id "rnCircRNA-33"; gene_name "Smim14"; gene_biotype "protein_coding"; transcript_biotype "circRNA"; oId "lv:circSmim14-379-002"; tissue "lv";
14	ncSplice	exon	44259814	44259926	.	+	.	gene_id "ENSRNOG00000002553"; transcript_id "rnCircRNA-33"; exon_number "1" gene_name "Smim14"; gene_biotype "protein_coding"; oId "lv:circSmim14-379-002"; tissue "lv";
14	ncSplice	exon	44266579	44266627	.	+	.	gene_id "ENSRNOG00000002553"; transcript_id "rnCircRNA-33"; exon_number "2" gene_name "Smim14"; gene_biotype "protein_coding"; oId "lv:circSmim14-379-002"; tissue "lv";
14	ncSplice	exon	44273607	44273749	.	+	.	gene_id "ENSRNOG00000002553"; transcript_id "rnCircRNA-33"; exon_number "3" gene_name "Smim14"; gene_biotype "protein_coding"; oId "lv:circSmim14-379-002"; tissue "lv";
14	ncSplice	exon	44276138	44276270	.	+	.	gene_id "ENSRNOG00000002553"; transcript_id "rnCircRNA-33"; exon_number "4" gene_name "Smim14"; gene_biotype "protein_coding"; oId "lv:circSmim14-379-002"; tissue "lv";
16	ncSplice	gene	21139419	21154658	.	+	.	gene_id "ENSRNOG00000022173"; gene_name "Gatad2a"; gene_source "ncSplice"; gene_biotype "protein_coding";
16	ncSplice	transcript	21139419	21154658	.	+	.	gene_id "ENSRNOG00000022173"; transcript_id "rnCircRNA-34"; gene_name "Gatad2a"; gene_biotype "protein_coding"; transcript_biotype "circRNA"; oId "lv:circGatad2a-446-001|ce:circGatad2a-1555-001|ts:circGatad2a-3019-002"; tissue "lv|ce|ts";
16	ncSplice	exon	21139419	21139520	.	+	.	gene_id "ENSRNOG00000022173"; transcript_id "rnCircRNA-34"; exon_number "1" gene_name "Gatad2a"; gene_biotype "protein_coding"; oId "lv:circGatad2a-446-001|ce:circGatad2a-1555-001|ts:circGatad2a-3019-002"; tissue "lv|ce|ts";
16	ncSplice	exon	21154401	21154658	.	+	.	gene_id "ENSRNOG00000022173"; transcript_id "rnCircRNA-34"; exon_number "2" gene_name "Gatad2a"; gene_biotype "protein_coding"; oId "lv:circGatad2a-446-001|ce:circGatad2a-1555-001|ts:circGatad2a-3019-002"; tissue "lv|ce|ts";
16	ncSplice	gene	23439776	23457387	.	+	.	gene_id "ENSRNOG00000013884"; gene_name "Psd3"; gene_source "ncSplice"; gene_biotype "protein_coding";
16	ncSplice	transcript	23439776	23457387	.	+	.	gene_id "ENSRNOG00000013884"; transcript_id "rnCircRNA-35"; gene_name "Psd3"; gene_biotype "protein_coding"; transcript_biotype "circRNA"; oId "lv:circPsd3-449-002|ts:circPsd3-3029-003"; tissue "lv|ts";
16	ncSplice	exon	23439776	23439982	.	+	.	gene_id "ENSRNOG00000013884"; transcript_id "rnCircRNA-35"; exon_number "1" gene_name "Psd3"; gene_biotype "protein_coding"; oId "lv:circPsd3-449-002|ts:circPsd3-3029-003"; tissue "lv|ts";
16	ncSplice	exon	23440082	23440162	.	+	.	gene_id "ENSRNOG00000013884"; transcript_id "rnCircRNA-35"; exon_number "2" gene_name "Psd3"; gene_biotype "protein_coding"; oId "lv:circPsd3-449-002|ts:circPsd3-3029-003"; tissue "lv|ts";
16	ncSplice	exon	23442450	23442562	.	+	.	gene_id "ENSRNOG00000013884"; transcript_id "rnCircRNA-35"; exon_number "3" gene_name "Psd3"; gene_biotype "protein_coding"; oId "lv:circPsd3-449-002|ts:circPsd3-3029-003"; tissue "lv|ts";
16	ncSplice	exon	23457329	23457387	.	+	.	gene_id "ENSRNOG00000013884"; transcript_id "rnCircRNA-35"; exon_number "4" gene_name "Psd3"; gene_biotype "protein_coding"; oId "lv:circPsd3-449-002|ts:circPsd3-3029-003"; tissue "lv|ts";
17	ncSplice	gene	77885763	77903937	.	-	.	gene_id "ENSRNOG00000023593"; gene_name "Upf2"; gene_source "ncSplice"; gene_biotype "protein_coding";
17	ncSplice	transcript	77885763	77903937	.	-	.	gene_id "ENSRNOG00000023593"; transcript_id "rnCircRNA-36"; gene_name "Upf2"; gene_biotype "protein_coding"; transcript_biotype "circRNA"; oId "lv:circUpf2-501-001"; tissue "lv";
17	ncSplice	exon	77885763	77885848	.	-	.	gene_id "ENSRNOG00000023593"; transcript_id "rnCircRNA-36"; exon_number "1" gene_name "Upf2"; gene_biotype "protein_coding"; oId "lv:circUpf2-501-001"; tissue "lv";
17	ncSplice	exon	77890570	77899235	.	-	.	gene_id "ENSRNOG00000023593"; transcript_id "rnCircRNA-36"; exon_number "2" gene_name "Upf2"; gene_biotype "protein_coding"; oId "lv:circUpf2-501-001"; tissue "lv";
17	ncSplice	exon	77903777	77903937	.	-	.	gene_id "ENSRNOG00000023593"; transcript_id "rnCircRNA-36"; exon_number "3" gene_name "Upf2"; gene_biotype "protein_coding"; oId "lv:circUpf2-501-001"; tissue "lv";
17	ncSplice	gene	78842454	78843849	.	+	.	gene_id "ENSRNOG00000017941"; gene_name "Optn"; gene_source "ncSplice"; gene_biotype "protein_coding";
17	ncSplice	transcript	78842454	78843849	.	+	.	gene_id "ENSRNOG00000017941"; transcript_id "rnCircRNA-37"; gene_name "Optn"; gene_biotype "protein_coding"; transcript_biotype "circRNA"; oId "lv:circOptn-505-001|ce:circOptn-1787-001|ts:circOptn-3506-001"; tissue "lv|ce|ts";
17	ncSplice	exon	78842454	78842630	.	+	.	gene_id "ENSRNOG00000017941"; transcript_id "rnCircRNA-37"; exon_number "1" gene_name "Optn"; gene_biotype "protein_coding"; oId "lv:circOptn-505-001|ce:circOptn-1787-001|ts:circOptn-3506-001"; tissue "lv|ce|ts";
17	ncSplice	exon	78843647	78843849	.	+	.	gene_id "ENSRNOG00000017941"; transcript_id "rnCircRNA-37"; exon_number "2" gene_name "Optn"; gene_biotype "protein_coding"; oId "lv:circOptn-505-001|ce:circOptn-1787-001|ts:circOptn-3506-001"; tissue "lv|ce|ts";
19	ncSplice	gene	26217256	26266211	.	+	.	gene_id "ENSRNOG00000015317"; gene_name "Cesl1"; gene_source "ncSplice"; gene_biotype "protein_coding";
19	ncSplice	transcript	26217256	26266211	.	+	.	gene_id "ENSRNOG00000015317"; transcript_id "rnCircRNA-38"; gene_name "Cesl1"; gene_biotype "protein_coding"; transcript_biotype "circRNA"; oId "lv:circCesl1-571-001"; tissue "lv";
19	ncSplice	exon	26217256	26217389	.	+	.	gene_id "ENSRNOG00000015317"; transcript_id "rnCircRNA-38"; exon_number "1" gene_name "Cesl1"; gene_biotype "protein_coding"; oId "lv:circCesl1-571-001"; tissue "lv";
19	ncSplice	exon	26219094	26219247	.	+	.	gene_id "ENSRNOG00000015317"; transcript_id "rnCircRNA-38"; exon_number "2" gene_name "Cesl1"; gene_biotype "protein_coding"; oId "lv:circCesl1-571-001"; tissue "lv";
19	ncSplice	exon	26221095	26248660	.	+	.	gene_id "ENSRNOG00000015317"; transcript_id "rnCircRNA-38"; exon_number "3" gene_name "Cesl1"; gene_biotype "protein_coding"; oId "lv:circCesl1-571-001"; tissue "lv";
19	ncSplice	exon	26252412	26255698	.	+	.	gene_id "ENSRNOG00000015317"; transcript_id "rnCircRNA-38"; exon_number "4" gene_name "Cesl1"; gene_biotype "protein_coding"; oId "lv:circCesl1-571-001"; tissue "lv";
19	ncSplice	exon	26258048	26258181	.	+	.	gene_id "ENSRNOG00000015317"; transcript_id "rnCircRNA-38"; exon_number "5" gene_name "Cesl1"; gene_biotype "protein_coding"; oId "lv:circCesl1-571-001"; tissue "lv";
19	ncSplice	exon	26259796	26263899	.	+	.	gene_id "ENSRNOG00000015317"; transcript_id "rnCircRNA-38"; exon_number "6" gene_name "Cesl1"; gene_biotype "protein_coding"; oId "lv:circCesl1-571-001"; tissue "lv";
19	ncSplice	exon	26266067	26266211	.	+	.	gene_id "ENSRNOG00000015317"; transcript_id "rnCircRNA-38"; exon_number "7" gene_name "Cesl1"; gene_biotype "protein_coding"; oId "lv:circCesl1-571-001"; tissue "lv";
19	ncSplice	gene	26258048	26266211	.	+	.	gene_id "ENSRNOG00000015438"; gene_name "LOC501233"; gene_source "ncSplice"; gene_biotype "protein_coding";
19	ncSplice	transcript	26258048	26266211	.	+	.	gene_id "ENSRNOG00000015438"; transcript_id "rnCircRNA-39"; gene_name "LOC501233"; gene_biotype "protein_coding"; transcript_biotype "circRNA"; oId "lv:circLOC501233-573-001"; tissue "lv";
19	ncSplice	exon	26258048	26258181	.	+	.	gene_id "ENSRNOG00000015438"; transcript_id "rnCircRNA-39"; exon_number "1" gene_name "LOC501233"; gene_biotype "protein_coding"; oId "lv:circLOC501233-573-001"; tissue "lv";
19	ncSplice	exon	26259796	26263899	.	+	.	gene_id "ENSRNOG00000015438"; transcript_id "rnCircRNA-39"; exon_number "2" gene_name "LOC501233"; gene_biotype "protein_coding"; oId "lv:circLOC501233-573-001"; tissue "lv";
19	ncSplice	exon	26266067	26266211	.	+	.	gene_id "ENSRNOG00000015438"; transcript_id "rnCircRNA-39"; exon_number "3" gene_name "LOC501233"; gene_biotype "protein_coding"; oId "lv:circLOC501233-573-001"; tissue "lv";
1	ncSplice	gene	93171408	93175808	.	-	.	gene_id "ENSRNOG00000021573"; gene_name "Dpy19l3"; gene_source "ncSplice"; gene_biotype "protein_coding";
1	ncSplice	transcript	93171408	93175808	.	-	.	gene_id "ENSRNOG00000021573"; transcript_id "rnCircRNA-40"; gene_name "Dpy19l3"; gene_biotype "protein_coding"; transcript_biotype "circRNA"; oId "lv:circDpy19l3-577-001"; tissue "lv";
1	ncSplice	exon	93171408	93171553	.	-	.	gene_id "ENSRNOG00000021573"; transcript_id "rnCircRNA-40"; exon_number "1" gene_name "Dpy19l3"; gene_biotype "protein_coding"; oId "lv:circDpy19l3-577-001"; tissue "lv";
1	ncSplice	exon	93173157	93173278	.	-	.	gene_id "ENSRNOG00000021573"; transcript_id "rnCircRNA-40"; exon_number "2" gene_name "Dpy19l3"; gene_biotype "protein_coding"; oId "lv:circDpy19l3-577-001"; tissue "lv";
1	ncSplice	exon	93175718	93175808	.	-	.	gene_id "ENSRNOG00000021573"; transcript_id "rnCircRNA-40"; exon_number "3" gene_name "Dpy19l3"; gene_biotype "protein_coding"; oId "lv:circDpy19l3-577-001"; tissue "lv";
19	ncSplice	gene	33188885	33191468	.	-	.	gene_id "ENSRNOG00000024101"; gene_name "Phkb"; gene_source "ncSplice"; gene_biotype "protein_coding";
19	ncSplice	transcript	33188885	33191468	.	-	.	gene_id "ENSRNOG00000024101"; transcript_id "rnCircRNA-41"; gene_name "Phkb"; gene_biotype "protein_coding"; transcript_biotype "circRNA"; oId "lv:circPhkb-585-001"; tissue "lv";
19	ncSplice	exon	33188885	33189023	.	-	.	gene_id "ENSRNOG00000024101"; transcript_id "rnCircRNA-41"; exon_number "1" gene_name "Phkb"; gene_biotype "protein_coding"; oId "lv:circPhkb-585-001"; tissue "lv";
19	ncSplice	exon	33191379	33191468	.	-	.	gene_id "ENSRNOG00000024101"; transcript_id "rnCircRNA-41"; exon_number "2" gene_name "Phkb"; gene_biotype "protein_coding"; oId "lv:circPhkb-585-001"; tissue "lv";
20	ncSplice	gene	29119261	29120633	.	-	.	gene_id "ENSRNOG00000000389"; gene_name "Dna2"; gene_source "ncSplice"; gene_biotype "protein_coding";
20	ncSplice	transcript	29119261	29120633	.	-	.	gene_id "ENSRNOG00000000389"; transcript_id "rnCircRNA-42"; gene_name "Dna2"; gene_biotype "protein_coding"; transcript_biotype "circRNA"; oId "lv:circDna2-625-001"; tissue "lv";
20	ncSplice	exon	29119261	29119444	.	-	.	gene_id "ENSRNOG00000000389"; transcript_id "rnCircRNA-42"; exon_number "1" gene_name "Dna2"; gene_biotype "protein_coding"; oId "lv:circDna2-625-001"; tissue "lv";
20	ncSplice	exon	29120455	29120633	.	-	.	gene_id "ENSRNOG00000000389"; transcript_id "rnCircRNA-42"; exon_number "2" gene_name "Dna2"; gene_biotype "protein_coding"; oId "lv:circDna2-625-001"; tissue "lv";
20	ncSplice	gene	46909308	46913497	.	-	.	gene_id "ENSRNOG00000000588"; gene_name "Slc16a10"; gene_source "ncSplice"; gene_biotype "protein_coding";
20	ncSplice	transcript	46909308	46913497	.	-	.	gene_id "ENSRNOG00000000588"; transcript_id "rnCircRNA-43"; gene_name "Slc16a10"; gene_biotype "protein_coding"; transcript_biotype "circRNA"; oId "lv:circSlc16a10-634-001"; tissue "lv";
20	ncSplice	exon	46909308	46909761	.	-	.	gene_id "ENSRNOG00000000588"; transcript_id "rnCircRNA-43"; exon_number "1" gene_name "Slc16a10"; gene_biotype "protein_coding"; oId "lv:circSlc16a10-634-001"; tissue "lv";
20	ncSplice	exon	46913353	46913497	.	-	.	gene_id "ENSRNOG00000000588"; transcript_id "rnCircRNA-43"; exon_number "2" gene_name "Slc16a10"; gene_biotype "protein_coding"; oId "lv:circSlc16a10-634-001"; tissue "lv";
2	ncSplice	gene	207700606	207708619	.	+	.	gene_id "ENSRNOG00000020386"; gene_name "Ash1l"; gene_source "ncSplice"; gene_biotype "protein_coding";
2	ncSplice	transcript	207700606	207708619	.	+	.	gene_id "ENSRNOG00000020386"; transcript_id "rnCircRNA-44"; gene_name "Ash1l"; gene_biotype "protein_coding"; transcript_biotype "circRNA"; oId "lv:circAsh1l-663-001|ce:circAsh1l-2442-001|ts:circAsh1l-4604-001"; tissue "lv|ce|ts";
2	ncSplice	exon	207700606	207700707	.	+	.	gene_id "ENSRNOG00000020386"; transcript_id "rnCircRNA-44"; exon_number "1" gene_name "Ash1l"; gene_biotype "protein_coding"; oId "lv:circAsh1l-663-001|ce:circAsh1l-2442-001|ts:circAsh1l-4604-001"; tissue "lv|ce|ts";
2	ncSplice	exon	207707884	207708619	.	+	.	gene_id "ENSRNOG00000020386"; transcript_id "rnCircRNA-44"; exon_number "2" gene_name "Ash1l"; gene_biotype "protein_coding"; oId "lv:circAsh1l-663-001|ce:circAsh1l-2442-001|ts:circAsh1l-4604-001"; tissue "lv|ce|ts";
2	ncSplice	gene	242837186	242846284	.	-	.	gene_id "ENSRNOG00000025160"; gene_name "Tmem56"; gene_source "ncSplice"; gene_biotype "protein_coding";
2	ncSplice	transcript	242837186	242846284	.	-	.	gene_id "ENSRNOG00000025160"; transcript_id "rnCircRNA-45"; gene_name "Tmem56"; gene_biotype "protein_coding"; transcript_biotype "circRNA"; oId "lv:circTmem56-688-001|ce:circTmem56-2501-001"; tissue "lv|ce";
2	ncSplice	exon	242837186	242837280	.	-	.	gene_id "ENSRNOG00000025160"; transcript_id "rnCircRNA-45"; exon_number "1" gene_name "Tmem56"; gene_biotype "protein_coding"; oId "lv:circTmem56-688-001|ce:circTmem56-2501-001"; tissue "lv|ce";
2	ncSplice	exon	242839362	242839420	.	-	.	gene_id "ENSRNOG00000025160"; transcript_id "rnCircRNA-45"; exon_number "2" gene_name "Tmem56"; gene_biotype "protein_coding"; oId "lv:circTmem56-688-001|ce:circTmem56-2501-001"; tissue "lv|ce";
2	ncSplice	exon	242841672	242841761	.	-	.	gene_id "ENSRNOG00000025160"; transcript_id "rnCircRNA-45"; exon_number "3" gene_name "Tmem56"; gene_biotype "protein_coding"; oId "lv:circTmem56-688-001|ce:circTmem56-2501-001"; tissue "lv|ce";
2	ncSplice	exon	242845672	242845837	.	-	.	gene_id "ENSRNOG00000025160"; transcript_id "rnCircRNA-45"; exon_number "4" gene_name "Tmem56"; gene_biotype "protein_coding"; oId "lv:circTmem56-688-001|ce:circTmem56-2501-001"; tissue "lv|ce";
2	ncSplice	exon	242846190	242846284	.	-	.	gene_id "ENSRNOG00000025160"; transcript_id "rnCircRNA-45"; exon_number "5" gene_name "Tmem56"; gene_biotype "protein_coding"; oId "lv:circTmem56-688-001|ce:circTmem56-2501-001"; tissue "lv|ce";
2	ncSplice	gene	42147315	42162026	.	+	.	gene_id "ENSRNOG00000047014"; gene_name "Homer1"; gene_source "ncSplice"; gene_biotype "protein_coding";
2	ncSplice	transcript	42147315	42162026	.	+	.	gene_id "ENSRNOG00000047014"; transcript_id "rnCircRNA-46"; gene_name "Homer1"; gene_biotype "protein_coding"; transcript_biotype "circRNA"; oId "lv:circHomer1-707-001|ce:circHomer1-2566-001|ts:circHomer1-4829-001"; tissue "lv|ce|ts";
2	ncSplice	exon	42147315	42147471	.	+	.	gene_id "ENSRNOG00000047014"; transcript_id "rnCircRNA-46"; exon_number "1" gene_name "Homer1"; gene_biotype "protein_coding"; oId "lv:circHomer1-707-001|ce:circHomer1-2566-001|ts:circHomer1-4829-001"; tissue "lv|ce|ts";
2	ncSplice	exon	42152017	42152148	.	+	.	gene_id "ENSRNOG00000047014"; transcript_id "rnCircRNA-46"; exon_number "2" gene_name "Homer1"; gene_biotype "protein_coding"; oId "lv:circHomer1-707-001|ce:circHomer1-2566-001|ts:circHomer1-4829-001"; tissue "lv|ce|ts";
2	ncSplice	exon	42154649	42154741	.	+	.	gene_id "ENSRNOG00000047014"; transcript_id "rnCircRNA-46"; exon_number "3" gene_name "Homer1"; gene_biotype "protein_coding"; oId "lv:circHomer1-707-001|ce:circHomer1-2566-001|ts:circHomer1-4829-001"; tissue "lv|ce|ts";
2	ncSplice	exon	42161887	42162026	.	+	.	gene_id "ENSRNOG00000047014"; transcript_id "rnCircRNA-46"; exon_number "4" gene_name "Homer1"; gene_biotype "protein_coding"; oId "lv:circHomer1-707-001|ce:circHomer1-2566-001|ts:circHomer1-4829-001"; tissue "lv|ce|ts";
2	ncSplice	gene	53079035	53084070	.	-	.	gene_id "ENSRNOG00000047137"; gene_name "Erbb2ip"; gene_source "ncSplice"; gene_biotype "protein_coding";
2	ncSplice	transcript	53079035	53084070	.	-	.	gene_id "ENSRNOG00000047137"; transcript_id "rnCircRNA-47"; gene_name "Erbb2ip"; gene_biotype "protein_coding"; transcript_biotype "circRNA"; oId "lv:circErbb2ip-719-001|ce:circErbb2ip-2596-001|ts:circErbb2ip-4895-002"; tissue "lv|ce|ts";
2	ncSplice	exon	53079035	53079152	.	-	.	gene_id "ENSRNOG00000047137"; transcript_id "rnCircRNA-47"; exon_number "1" gene_name "Erbb2ip"; gene_biotype "protein_coding"; oId "lv:circErbb2ip-719-001|ce:circErbb2ip-2596-001|ts:circErbb2ip-4895-002"; tissue "lv|ce|ts";
2	ncSplice	exon	53080710	53080907	.	-	.	gene_id "ENSRNOG00000047137"; transcript_id "rnCircRNA-47"; exon_number "2" gene_name "Erbb2ip"; gene_biotype "protein_coding"; oId "lv:circErbb2ip-719-001|ce:circErbb2ip-2596-001|ts:circErbb2ip-4895-002"; tissue "lv|ce|ts";
2	ncSplice	exon	53084023	53084070	.	-	.	gene_id "ENSRNOG00000047137"; transcript_id "rnCircRNA-47"; exon_number "3" gene_name "Erbb2ip"; gene_biotype "protein_coding"; oId "lv:circErbb2ip-719-001|ce:circErbb2ip-2596-001|ts:circErbb2ip-4895-002"; tissue "lv|ce|ts";
3	ncSplice	gene	117801103	117802086	.	-	.	gene_id "ENSRNOG00000014483"; gene_name "Ino80"; gene_source "ncSplice"; gene_biotype "protein_coding";
3	ncSplice	transcript	117801103	117802086	.	-	.	gene_id "ENSRNOG00000014483"; transcript_id "rnCircRNA-48"; gene_name "Ino80"; gene_biotype "protein_coding"; transcript_biotype "circRNA"; oId "lv:circIno80-737-001|ce:circIno80-2682-001|ts:circIno80-5069-001"; tissue "lv|ce|ts";
3	ncSplice	exon	117801103	117801183	.	-	.	gene_id "ENSRNOG00000014483"; transcript_id "rnCircRNA-48"; exon_number "1" gene_name "Ino80"; gene_biotype "protein_coding"; oId "lv:circIno80-737-001|ce:circIno80-2682-001|ts:circIno80-5069-001"; tissue "lv|ce|ts";
3	ncSplice	exon	117801877	117802086	.	-	.	gene_id "ENSRNOG00000014483"; transcript_id "rnCircRNA-48"; exon_number "2" gene_name "Ino80"; gene_biotype "protein_coding"; oId "lv:circIno80-737-001|ce:circIno80-2682-001|ts:circIno80-5069-001"; tissue "lv|ce|ts";
3	ncSplice	gene	133941443	133959916	.	-	.	gene_id "ENSRNOG00000004601"; gene_name "Hao1"; gene_source "ncSplice"; gene_biotype "protein_coding";
3	ncSplice	transcript	133941443	133959916	.	-	.	gene_id "ENSRNOG00000004601"; transcript_id "rnCircRNA-49"; gene_name "Hao1"; gene_biotype "protein_coding"; transcript_biotype "circRNA"; oId "lv:circHao1-751-001"; tissue "lv";
3	ncSplice	exon	133941443	133941534	.	-	.	gene_id "ENSRNOG00000004601"; transcript_id "rnCircRNA-49"; exon_number "1" gene_name "Hao1"; gene_biotype "protein_coding"; oId "lv:circHao1-751-001"; tissue "lv";
3	ncSplice	exon	133951897	133952072	.	-	.	gene_id "ENSRNOG00000004601"; transcript_id "rnCircRNA-49"; exon_number "2" gene_name "Hao1"; gene_biotype "protein_coding"; oId "lv:circHao1-751-001"; tissue "lv";
3	ncSplice	exon	133959661	133959916	.	-	.	gene_id "ENSRNOG00000004601"; transcript_id "rnCircRNA-49"; exon_number "3" gene_name "Hao1"; gene_biotype "protein_coding"; oId "lv:circHao1-751-001"; tissue "lv";
3	ncSplice	gene	63856837	63870473	.	-	.	gene_id "ENSRNOG00000009300"; gene_name "Tlk1"; gene_source "ncSplice"; gene_biotype "protein_coding";
3	ncSplice	transcript	63856837	63870473	.	-	.	gene_id "ENSRNOG00000009300"; transcript_id "rnCircRNA-50"; gene_name "Tlk1"; gene_biotype "protein_coding"; transcript_biotype "circRNA"; oId "lv:circTlk1-789-001"; tissue "lv";
3	ncSplice	exon	63856837	63860104	.	-	.	gene_id "ENSRNOG00000009300"; transcript_id "rnCircRNA-50"; exon_number "1" gene_name "Tlk1"; gene_biotype "protein_coding"; oId "lv:circTlk1-789-001"; tissue "lv";
3	ncSplice	exon	63870355	63870473	.	-	.	gene_id "ENSRNOG00000009300"; transcript_id "rnCircRNA-50"; exon_number "2" gene_name "Tlk1"; gene_biotype "protein_coding"; oId "lv:circTlk1-789-001"; tissue "lv";
3	ncSplice	gene	87830790	87846455	.	+	.	gene_id "3:87830789:87846455:1"; gene_name "3:87830789:87846455:1"; gene_source "ncSplice"; gene_biotype "novel";
3	ncSplice	transcript	87830790	87846455	.	+	.	gene_id "3:87830789:87846455:1"; transcript_id "rnCircRNA-51"; gene_name "3:87830789:87846455:1"; gene_biotype "novel"; transcript_biotype "circRNA"; oId "lv:circ3:87830789:87846455:1-801-001|ts:circ3:87830789:87846455:1-5650-020"; tissue "lv|ts";
3	ncSplice	exon	87830790	87830830	.	+	.	gene_id "3:87830789:87846455:1"; transcript_id "rnCircRNA-51"; exon_number "1" gene_name "3:87830789:87846455:1"; gene_biotype "novel"; oId "lv:circ3:87830789:87846455:1-801-001|ts:circ3:87830789:87846455:1-5650-020"; tissue "lv|ts";
3	ncSplice	exon	87832201	87832312	.	+	.	gene_id "3:87830789:87846455:1"; transcript_id "rnCircRNA-51"; exon_number "2" gene_name "3:87830789:87846455:1"; gene_biotype "novel"; oId "lv:circ3:87830789:87846455:1-801-001|ts:circ3:87830789:87846455:1-5650-020"; tissue "lv|ts";
3	ncSplice	exon	87837803	87837946	.	+	.	gene_id "3:87830789:87846455:1"; transcript_id "rnCircRNA-51"; exon_number "3" gene_name "3:87830789:87846455:1"; gene_biotype "novel"; oId "lv:circ3:87830789:87846455:1-801-001|ts:circ3:87830789:87846455:1-5650-020"; tissue "lv|ts";
3	ncSplice	exon	87844145	87844177	.	+	.	gene_id "3:87830789:87846455:1"; transcript_id "rnCircRNA-51"; exon_number "4" gene_name "3:87830789:87846455:1"; gene_biotype "novel"; oId "lv:circ3:87830789:87846455:1-801-001|ts:circ3:87830789:87846455:1-5650-020"; tissue "lv|ts";
3	ncSplice	exon	87846390	87846455	.	+	.	gene_id "3:87830789:87846455:1"; transcript_id "rnCircRNA-51"; exon_number "5" gene_name "3:87830789:87846455:1"; gene_biotype "novel"; oId "lv:circ3:87830789:87846455:1-801-001|ts:circ3:87830789:87846455:1-5650-020"; tissue "lv|ts";
4	ncSplice	gene	147348731	147358990	.	-	.	gene_id "ENSRNOG00000008063"; gene_name "Hibadh"; gene_source "ncSplice"; gene_biotype "protein_coding";
4	ncSplice	transcript	147348731	147358990	.	-	.	gene_id "ENSRNOG00000008063"; transcript_id "rnCircRNA-52"; gene_name "Hibadh"; gene_biotype "protein_coding"; transcript_biotype "circRNA"; oId "lv:circHibadh-815-006|ce:circHibadh-3038-001"; tissue "lv|ce";
4	ncSplice	exon	147348731	147348852	.	-	.	gene_id "ENSRNOG00000008063"; transcript_id "rnCircRNA-52"; exon_number "1" gene_name "Hibadh"; gene_biotype "protein_coding"; oId "lv:circHibadh-815-006|ce:circHibadh-3038-001"; tissue "lv|ce";
4	ncSplice	exon	147351748	147351857	.	-	.	gene_id "ENSRNOG00000008063"; transcript_id "rnCircRNA-52"; exon_number "2" gene_name "Hibadh"; gene_biotype "protein_coding"; oId "lv:circHibadh-815-006|ce:circHibadh-3038-001"; tissue "lv|ce";
4	ncSplice	exon	147358830	147358990	.	-	.	gene_id "ENSRNOG00000008063"; transcript_id "rnCircRNA-52"; exon_number "3" gene_name "Hibadh"; gene_biotype "protein_coding"; oId "lv:circHibadh-815-006|ce:circHibadh-3038-001"; tissue "lv|ce";
4	ncSplice	gene	192217064	192218115	.	-	.	gene_id "ENSRNOG00000005686"; gene_name "Suclg2"; gene_source "ncSplice"; gene_biotype "protein_coding";
4	ncSplice	transcript	192217064	192218115	.	-	.	gene_id "ENSRNOG00000005686"; transcript_id "rnCircRNA-53"; gene_name "Suclg2"; gene_biotype "protein_coding"; transcript_biotype "circRNA"; oId "lv:circSuclg2-834-001|ts:circSuclg2-5834-001"; tissue "lv|ts";
4	ncSplice	exon	192217064	192217154	.	-	.	gene_id "ENSRNOG00000005686"; transcript_id "rnCircRNA-53"; exon_number "1" gene_name "Suclg2"; gene_biotype "protein_coding"; oId "lv:circSuclg2-834-001|ts:circSuclg2-5834-001"; tissue "lv|ts";
4	ncSplice	exon	192218025	192218115	.	-	.	gene_id "ENSRNOG00000005686"; transcript_id "rnCircRNA-53"; exon_number "2" gene_name "Suclg2"; gene_biotype "protein_coding"; oId "lv:circSuclg2-834-001|ts:circSuclg2-5834-001"; tissue "lv|ts";
4	ncSplice	gene	221607676	221686768	.	+	.	gene_id "ENSRNOG00000005599"; gene_name "Cpamd8"; gene_source "ncSplice"; gene_biotype "protein_coding";
4	ncSplice	transcript	221607676	221686768	.	+	.	gene_id "ENSRNOG00000005599"; transcript_id "rnCircRNA-54"; gene_name "Cpamd8"; gene_biotype "protein_coding"; transcript_biotype "circRNA"; oId "lv:circCpamd8-855-001"; tissue "lv";
4	ncSplice	exon	221607676	221613281	.	+	.	gene_id "ENSRNOG00000005599"; transcript_id "rnCircRNA-54"; exon_number "1" gene_name "Cpamd8"; gene_biotype "protein_coding"; oId "lv:circCpamd8-855-001"; tissue "lv";
4	ncSplice	exon	221613420	221613529	.	+	.	gene_id "ENSRNOG00000005599"; transcript_id "rnCircRNA-54"; exon_number "2" gene_name "Cpamd8"; gene_biotype "protein_coding"; oId "lv:circCpamd8-855-001"; tissue "lv";
4	ncSplice	exon	221614189	221614350	.	+	.	gene_id "ENSRNOG00000005599"; transcript_id "rnCircRNA-54"; exon_number "3" gene_name "Cpamd8"; gene_biotype "protein_coding"; oId "lv:circCpamd8-855-001"; tissue "lv";
4	ncSplice	exon	221621119	221621346	.	+	.	gene_id "ENSRNOG00000005599"; transcript_id "rnCircRNA-54"; exon_number "4" gene_name "Cpamd8"; gene_biotype "protein_coding"; oId "lv:circCpamd8-855-001"; tissue "lv";
4	ncSplice	exon	221621551	221621614	.	+	.	gene_id "ENSRNOG00000005599"; transcript_id "rnCircRNA-54"; exon_number "5" gene_name "Cpamd8"; gene_biotype "protein_coding"; oId "lv:circCpamd8-855-001"; tissue "lv";
4	ncSplice	exon	221623822	221623970	.	+	.	gene_id "ENSRNOG00000005599"; transcript_id "rnCircRNA-54"; exon_number "6" gene_name "Cpamd8"; gene_biotype "protein_coding"; oId "lv:circCpamd8-855-001"; tissue "lv";
4	ncSplice	exon	221625812	221625961	.	+	.	gene_id "ENSRNOG00000005599"; transcript_id "rnCircRNA-54"; exon_number "7" gene_name "Cpamd8"; gene_biotype "protein_coding"; oId "lv:circCpamd8-855-001"; tissue "lv";
4	ncSplice	exon	221627192	221627320	.	+	.	gene_id "ENSRNOG00000005599"; transcript_id "rnCircRNA-54"; exon_number "8" gene_name "Cpamd8"; gene_biotype "protein_coding"; oId "lv:circCpamd8-855-001"; tissue "lv";
4	ncSplice	exon	221627995	221628079	.	+	.	gene_id "ENSRNOG00000005599"; transcript_id "rnCircRNA-54"; exon_number "9" gene_name "Cpamd8"; gene_biotype "protein_coding"; oId "lv:circCpamd8-855-001"; tissue "lv";
4	ncSplice	exon	221630380	221630563	.	+	.	gene_id "ENSRNOG00000005599"; transcript_id "rnCircRNA-54"; exon_number "10" gene_name "Cpamd8"; gene_biotype "protein_coding"; oId "lv:circCpamd8-855-001"; tissue "lv";
4	ncSplice	exon	221631121	221631349	.	+	.	gene_id "ENSRNOG00000005599"; transcript_id "rnCircRNA-54"; exon_number "11" gene_name "Cpamd8"; gene_biotype "protein_coding"; oId "lv:circCpamd8-855-001"; tissue "lv";
4	ncSplice	exon	221632085	221632211	.	+	.	gene_id "ENSRNOG00000005599"; transcript_id "rnCircRNA-54"; exon_number "12" gene_name "Cpamd8"; gene_biotype "protein_coding"; oId "lv:circCpamd8-855-001"; tissue "lv";
4	ncSplice	exon	221632469	221632590	.	+	.	gene_id "ENSRNOG00000005599"; transcript_id "rnCircRNA-54"; exon_number "13" gene_name "Cpamd8"; gene_biotype "protein_coding"; oId "lv:circCpamd8-855-001"; tissue "lv";
4	ncSplice	exon	221633067	221633118	.	+	.	gene_id "ENSRNOG00000005599"; transcript_id "rnCircRNA-54"; exon_number "14" gene_name "Cpamd8"; gene_biotype "protein_coding"; oId "lv:circCpamd8-855-001"; tissue "lv";
4	ncSplice	exon	221634866	221634949	.	+	.	gene_id "ENSRNOG00000005599"; transcript_id "rnCircRNA-54"; exon_number "15" gene_name "Cpamd8"; gene_biotype "protein_coding"; oId "lv:circCpamd8-855-001"; tissue "lv";
4	ncSplice	exon	221635214	221635682	.	+	.	gene_id "ENSRNOG00000005599"; transcript_id "rnCircRNA-54"; exon_number "16" gene_name "Cpamd8"; gene_biotype "protein_coding"; oId "lv:circCpamd8-855-001"; tissue "lv";
4	ncSplice	exon	221636720	221636876	.	+	.	gene_id "ENSRNOG00000005599"; transcript_id "rnCircRNA-54"; exon_number "17" gene_name "Cpamd8"; gene_biotype "protein_coding"; oId "lv:circCpamd8-855-001"; tissue "lv";
4	ncSplice	exon	221637099	221643555	.	+	.	gene_id "ENSRNOG00000005599"; transcript_id "rnCircRNA-54"; exon_number "18" gene_name "Cpamd8"; gene_biotype "protein_coding"; oId "lv:circCpamd8-855-001"; tissue "lv";
4	ncSplice	exon	221643708	221643835	.	+	.	gene_id "ENSRNOG00000005599"; transcript_id "rnCircRNA-54"; exon_number "19" gene_name "Cpamd8"; gene_biotype "protein_coding"; oId "lv:circCpamd8-855-001"; tissue "lv";
4	ncSplice	exon	221644859	221686768	.	+	.	gene_id "ENSRNOG00000005599"; transcript_id "rnCircRNA-54"; exon_number "20" gene_name "Cpamd8"; gene_biotype "protein_coding"; oId "lv:circCpamd8-855-001"; tissue "lv";
4	ncSplice	gene	221687741	221765604	.	+	.	gene_id "ENSRNOG00000037188"; gene_name "LOC100911833"; gene_source "ncSplice"; gene_biotype "protein_coding";
4	ncSplice	transcript	221687741	221765604	.	+	.	gene_id "ENSRNOG00000037188"; transcript_id "rnCircRNA-55"; gene_name "LOC100911833"; gene_biotype "protein_coding"; transcript_biotype "circRNA"; oId "lv:circLOC100911833-857-001"; tissue "lv";
4	ncSplice	exon	221687741	221687849	.	+	.	gene_id "ENSRNOG00000037188"; transcript_id "rnCircRNA-55"; exon_number "1" gene_name "LOC100911833"; gene_biotype "protein_coding"; oId "lv:circLOC100911833-857-001"; tissue "lv";
4	ncSplice	exon	221693201	221759682	.	+	.	gene_id "ENSRNOG00000037188"; transcript_id "rnCircRNA-55"; exon_number "2" gene_name "LOC100911833"; gene_biotype "protein_coding"; oId "lv:circLOC100911833-857-001"; tissue "lv";
4	ncSplice	exon	221760709	221760892	.	+	.	gene_id "ENSRNOG00000037188"; transcript_id "rnCircRNA-55"; exon_number "3" gene_name "LOC100911833"; gene_biotype "protein_coding"; oId "lv:circLOC100911833-857-001"; tissue "lv";
4	ncSplice	exon	221761954	221762113	.	+	.	gene_id "ENSRNOG00000037188"; transcript_id "rnCircRNA-55"; exon_number "4" gene_name "LOC100911833"; gene_biotype "protein_coding"; oId "lv:circLOC100911833-857-001"; tissue "lv";
4	ncSplice	exon	221762217	221762269	.	+	.	gene_id "ENSRNOG00000037188"; transcript_id "rnCircRNA-55"; exon_number "5" gene_name "LOC100911833"; gene_biotype "protein_coding"; oId "lv:circLOC100911833-857-001"; tissue "lv";
4	ncSplice	exon	221764679	221764699	.	+	.	gene_id "ENSRNOG00000037188"; transcript_id "rnCircRNA-55"; exon_number "6" gene_name "LOC100911833"; gene_biotype "protein_coding"; oId "lv:circLOC100911833-857-001"; tissue "lv";
4	ncSplice	exon	221764967	221765135	.	+	.	gene_id "ENSRNOG00000037188"; transcript_id "rnCircRNA-55"; exon_number "7" gene_name "LOC100911833"; gene_biotype "protein_coding"; oId "lv:circLOC100911833-857-001"; tissue "lv";
4	ncSplice	exon	221765520	221765604	.	+	.	gene_id "ENSRNOG00000037188"; transcript_id "rnCircRNA-55"; exon_number "8" gene_name "LOC100911833"; gene_biotype "protein_coding"; oId "lv:circLOC100911833-857-001"; tissue "lv";
4	ncSplice	gene	221760709	221844891	.	+	.	gene_id "ENSRNOG00000037188"; gene_name "LOC100911833"; gene_source "ncSplice"; gene_biotype "protein_coding";
4	ncSplice	transcript	221760709	221844891	.	+	.	gene_id "ENSRNOG00000037188"; transcript_id "rnCircRNA-56"; gene_name "LOC100911833"; gene_biotype "protein_coding"; transcript_biotype "circRNA"; oId "lv:circLOC100911833-861-001"; tissue "lv";
4	ncSplice	exon	221760709	221760892	.	+	.	gene_id "ENSRNOG00000037188"; transcript_id "rnCircRNA-56"; exon_number "1" gene_name "LOC100911833"; gene_biotype "protein_coding"; oId "lv:circLOC100911833-861-001"; tissue "lv";
4	ncSplice	exon	221761954	221762113	.	+	.	gene_id "ENSRNOG00000037188"; transcript_id "rnCircRNA-56"; exon_number "2" gene_name "LOC100911833"; gene_biotype "protein_coding"; oId "lv:circLOC100911833-861-001"; tissue "lv";
4	ncSplice	exon	221762217	221762269	.	+	.	gene_id "ENSRNOG00000037188"; transcript_id "rnCircRNA-56"; exon_number "3" gene_name "LOC100911833"; gene_biotype "protein_coding"; oId "lv:circLOC100911833-861-001"; tissue "lv";
4	ncSplice	exon	221764679	221764699	.	+	.	gene_id "ENSRNOG00000037188"; transcript_id "rnCircRNA-56"; exon_number "4" gene_name "LOC100911833"; gene_biotype "protein_coding"; oId "lv:circLOC100911833-861-001"; tissue "lv";
4	ncSplice	exon	221764967	221765135	.	+	.	gene_id "ENSRNOG00000037188"; transcript_id "rnCircRNA-56"; exon_number "5" gene_name "LOC100911833"; gene_biotype "protein_coding"; oId "lv:circLOC100911833-861-001"; tissue "lv";
4	ncSplice	exon	221765520	221766685	.	+	.	gene_id "ENSRNOG00000037188"; transcript_id "rnCircRNA-56"; exon_number "6" gene_name "LOC100911833"; gene_biotype "protein_coding"; oId "lv:circLOC100911833-861-001"; tissue "lv";
4	ncSplice	exon	221771357	221771477	.	+	.	gene_id "ENSRNOG00000037188"; transcript_id "rnCircRNA-56"; exon_number "7" gene_name "LOC100911833"; gene_biotype "protein_coding"; oId "lv:circLOC100911833-861-001"; tissue "lv";
4	ncSplice	exon	221771617	221771726	.	+	.	gene_id "ENSRNOG00000037188"; transcript_id "rnCircRNA-56"; exon_number "8" gene_name "LOC100911833"; gene_biotype "protein_coding"; oId "lv:circLOC100911833-861-001"; tissue "lv";
4	ncSplice	exon	221772421	221772582	.	+	.	gene_id "ENSRNOG00000037188"; transcript_id "rnCircRNA-56"; exon_number "9" gene_name "LOC100911833"; gene_biotype "protein_coding"; oId "lv:circLOC100911833-861-001"; tissue "lv";
4	ncSplice	exon	221779162	221779389	.	+	.	gene_id "ENSRNOG00000037188"; transcript_id "rnCircRNA-56"; exon_number "10" gene_name "LOC100911833"; gene_biotype "protein_coding"; oId "lv:circLOC100911833-861-001"; tissue "lv";
4	ncSplice	exon	221779597	221779660	.	+	.	gene_id "ENSRNOG00000037188"; transcript_id "rnCircRNA-56"; exon_number "11" gene_name "LOC100911833"; gene_biotype "protein_coding"; oId "lv:circLOC100911833-861-001"; tissue "lv";
4	ncSplice	exon	221785136	221785284	.	+	.	gene_id "ENSRNOG00000037188"; transcript_id "rnCircRNA-56"; exon_number "12" gene_name "LOC100911833"; gene_biotype "protein_coding"; oId "lv:circLOC100911833-861-001"; tissue "lv";
4	ncSplice	exon	221787076	221787225	.	+	.	gene_id "ENSRNOG00000037188"; transcript_id "rnCircRNA-56"; exon_number "13" gene_name "LOC100911833"; gene_biotype "protein_coding"; oId "lv:circLOC100911833-861-001"; tissue "lv";
4	ncSplice	exon	221788402	221788563	.	+	.	gene_id "ENSRNOG00000037188"; transcript_id "rnCircRNA-56"; exon_number "14" gene_name "LOC100911833"; gene_biotype "protein_coding"; oId "lv:circLOC100911833-861-001"; tissue "lv";
4	ncSplice	exon	221789181	221789262	.	+	.	gene_id "ENSRNOG00000037188"; transcript_id "rnCircRNA-56"; exon_number "15" gene_name "LOC100911833"; gene_biotype "protein_coding"; oId "lv:circLOC100911833-861-001"; tissue "lv";
4	ncSplice	exon	221791560	221791743	.	+	.	gene_id "ENSRNOG00000037188"; transcript_id "rnCircRNA-56"; exon_number "16" gene_name "LOC100911833"; gene_biotype "protein_coding"; oId "lv:circLOC100911833-861-001"; tissue "lv";
4	ncSplice	exon	221792300	221792528	.	+	.	gene_id "ENSRNOG00000037188"; transcript_id "rnCircRNA-56"; exon_number "17" gene_name "LOC100911833"; gene_biotype "protein_coding"; oId "lv:circLOC100911833-861-001"; tissue "lv";
4	ncSplice	exon	221793227	221793353	.	+	.	gene_id "ENSRNOG00000037188"; transcript_id "rnCircRNA-56"; exon_number "18" gene_name "LOC100911833"; gene_biotype "protein_coding"; oId "lv:circLOC100911833-861-001"; tissue "lv";
4	ncSplice	exon	221793611	221798029	.	+	.	gene_id "ENSRNOG00000037188"; transcript_id "rnCircRNA-56"; exon_number "19" gene_name "LOC100911833"; gene_biotype "protein_coding"; oId "lv:circLOC100911833-861-001"; tissue "lv";
4	ncSplice	exon	221798252	221807089	.	+	.	gene_id "ENSRNOG00000037188"; transcript_id "rnCircRNA-56"; exon_number "20" gene_name "LOC100911833"; gene_biotype "protein_coding"; oId "lv:circLOC100911833-861-001"; tissue "lv";
4	ncSplice	exon	221807897	221844891	.	+	.	gene_id "ENSRNOG00000037188"; transcript_id "rnCircRNA-56"; exon_number "21" gene_name "LOC100911833"; gene_biotype "protein_coding"; oId "lv:circLOC100911833-861-001"; tissue "lv";
4	ncSplice	gene	232796242	232798721	.	-	.	gene_id "ENSRNOG00000006628"; gene_name "Dusp16"; gene_source "ncSplice"; gene_biotype "protein_coding";
4	ncSplice	transcript	232796242	232798721	.	-	.	gene_id "ENSRNOG00000006628"; transcript_id "rnCircRNA-57"; gene_name "Dusp16"; gene_biotype "protein_coding"; transcript_biotype "circRNA"; oId "lv:circDusp16-869-001|ce:circDusp16-3180-001|ts:circDusp16-5946-001"; tissue "lv|ce|ts";
4	ncSplice	exon	232796242	232796380	.	-	.	gene_id "ENSRNOG00000006628"; transcript_id "rnCircRNA-57"; exon_number "1" gene_name "Dusp16"; gene_biotype "protein_coding"; oId "lv:circDusp16-869-001|ce:circDusp16-3180-001|ts:circDusp16-5946-001"; tissue "lv|ce|ts";
4	ncSplice	exon	232798131	232798721	.	-	.	gene_id "ENSRNOG00000006628"; transcript_id "rnCircRNA-57"; exon_number "2" gene_name "Dusp16"; gene_biotype "protein_coding"; oId "lv:circDusp16-869-001|ce:circDusp16-3180-001|ts:circDusp16-5946-001"; tissue "lv|ce|ts";
4	ncSplice	gene	58469416	58480010	.	+	.	gene_id "ENSRNOG00000011524"; gene_name "Mkln1"; gene_source "ncSplice"; gene_biotype "protein_coding";
4	ncSplice	transcript	58469416	58480010	.	+	.	gene_id "ENSRNOG00000011524"; transcript_id "rnCircRNA-58"; gene_name "Mkln1"; gene_biotype "protein_coding"; transcript_biotype "circRNA"; oId "lv:circMkln1-899-001|ce:circMkln1-3267-001|ts:circMkln1-6109-002"; tissue "lv|ce|ts";
4	ncSplice	exon	58469416	58469485	.	+	.	gene_id "ENSRNOG00000011524"; transcript_id "rnCircRNA-58"; exon_number "1" gene_name "Mkln1"; gene_biotype "protein_coding"; oId "lv:circMkln1-899-001|ce:circMkln1-3267-001|ts:circMkln1-6109-002"; tissue "lv|ce|ts";
4	ncSplice	exon	58474463	58474605	.	+	.	gene_id "ENSRNOG00000011524"; transcript_id "rnCircRNA-58"; exon_number "2" gene_name "Mkln1"; gene_biotype "protein_coding"; oId "lv:circMkln1-899-001|ce:circMkln1-3267-001|ts:circMkln1-6109-002"; tissue "lv|ce|ts";
4	ncSplice	exon	58475844	58475932	.	+	.	gene_id "ENSRNOG00000011524"; transcript_id "rnCircRNA-58"; exon_number "3" gene_name "Mkln1"; gene_biotype "protein_coding"; oId "lv:circMkln1-899-001|ce:circMkln1-3267-001|ts:circMkln1-6109-002"; tissue "lv|ce|ts";
4	ncSplice	exon	58478445	58478554	.	+	.	gene_id "ENSRNOG00000011524"; transcript_id "rnCircRNA-58"; exon_number "4" gene_name "Mkln1"; gene_biotype "protein_coding"; oId "lv:circMkln1-899-001|ce:circMkln1-3267-001|ts:circMkln1-6109-002"; tissue "lv|ce|ts";
4	ncSplice	exon	58479818	58480010	.	+	.	gene_id "ENSRNOG00000011524"; transcript_id "rnCircRNA-58"; exon_number "5" gene_name "Mkln1"; gene_biotype "protein_coding"; oId "lv:circMkln1-899-001|ce:circMkln1-3267-001|ts:circMkln1-6109-002"; tissue "lv|ce|ts";
4	ncSplice	gene	6240827	6243558	.	+	.	gene_id "4:6240826:6243558:1"; gene_name "4:6240826:6243558:1"; gene_source "ncSplice"; gene_biotype "novel";
4	ncSplice	transcript	6240827	6243558	.	+	.	gene_id "4:6240826:6243558:1"; transcript_id "rnCircRNA-59"; gene_name "4:6240826:6243558:1"; gene_biotype "novel"; transcript_biotype "circRNA"; oId "lv:circ4:6240826:6243558:1-903-001|ts:circ4:6240826:6243558:1-6146-001"; tissue "lv|ts";
4	ncSplice	exon	6240827	6240955	.	+	.	gene_id "4:6240826:6243558:1"; transcript_id "rnCircRNA-59"; exon_number "1" gene_name "4:6240826:6243558:1"; gene_biotype "novel"; oId "lv:circ4:6240826:6243558:1-903-001|ts:circ4:6240826:6243558:1-6146-001"; tissue "lv|ts";
4	ncSplice	exon	6243439	6243558	.	+	.	gene_id "4:6240826:6243558:1"; transcript_id "rnCircRNA-59"; exon_number "2" gene_name "4:6240826:6243558:1"; gene_biotype "novel"; oId "lv:circ4:6240826:6243558:1-903-001|ts:circ4:6240826:6243558:1-6146-001"; tissue "lv|ts";
4	ncSplice	gene	65984618	65993027	.	+	.	gene_id "ENSRNOG00000005564"; gene_name "Ubn2"; gene_source "ncSplice"; gene_biotype "protein_coding";
4	ncSplice	transcript	65984618	65993027	.	+	.	gene_id "ENSRNOG00000005564"; transcript_id "rnCircRNA-60"; gene_name "Ubn2"; gene_biotype "protein_coding"; transcript_biotype "circRNA"; oId "lv:circUbn2-907-001|ce:circUbn2-3296-001"; tissue "lv|ce";
4	ncSplice	exon	65984618	65984710	.	+	.	gene_id "ENSRNOG00000005564"; transcript_id "rnCircRNA-60"; exon_number "1" gene_name "Ubn2"; gene_biotype "protein_coding"; oId "lv:circUbn2-907-001|ce:circUbn2-3296-001"; tissue "lv|ce";
4	ncSplice	exon	65992926	65993027	.	+	.	gene_id "ENSRNOG00000005564"; transcript_id "rnCircRNA-60"; exon_number "2" gene_name "Ubn2"; gene_biotype "protein_coding"; oId "lv:circUbn2-907-001|ce:circUbn2-3296-001"; tissue "lv|ce";
5	ncSplice	gene	132518963	132521466	.	+	.	gene_id "ENSRNOG00000007111"; gene_name "Nrd1"; gene_source "ncSplice"; gene_biotype "protein_coding";
5	ncSplice	transcript	132518963	132521466	.	+	.	gene_id "ENSRNOG00000007111"; transcript_id "rnCircRNA-61"; gene_name "Nrd1"; gene_biotype "protein_coding"; transcript_biotype "circRNA"; oId "lv:circNrd1-935-001|ce:circNrd1-3407-001"; tissue "lv|ce";
5	ncSplice	exon	132518963	132519049	.	+	.	gene_id "ENSRNOG00000007111"; transcript_id "rnCircRNA-61"; exon_number "1" gene_name "Nrd1"; gene_biotype "protein_coding"; oId "lv:circNrd1-935-001|ce:circNrd1-3407-001"; tissue "lv|ce";
5	ncSplice	exon	132519806	132519925	.	+	.	gene_id "ENSRNOG00000007111"; transcript_id "rnCircRNA-61"; exon_number "2" gene_name "Nrd1"; gene_biotype "protein_coding"; oId "lv:circNrd1-935-001|ce:circNrd1-3407-001"; tissue "lv|ce";
5	ncSplice	exon	132521415	132521466	.	+	.	gene_id "ENSRNOG00000007111"; transcript_id "rnCircRNA-61"; exon_number "3" gene_name "Nrd1"; gene_biotype "protein_coding"; oId "lv:circNrd1-935-001|ce:circNrd1-3407-001"; tissue "lv|ce";
5	ncSplice	gene	140227261	140237214	.	+	.	gene_id "ENSRNOG00000019381"; gene_name "Eri3"; gene_source "ncSplice"; gene_biotype "protein_coding";
5	ncSplice	transcript	140227261	140237214	.	+	.	gene_id "ENSRNOG00000019381"; transcript_id "rnCircRNA-62"; gene_name "Eri3"; gene_biotype "protein_coding"; transcript_biotype "circRNA"; oId "lv:circEri3-942-002|ce:circEri3-3447-001|ts:circEri3-6414-018"; tissue "lv|ce|ts";
5	ncSplice	exon	140227261	140227377	.	+	.	gene_id "ENSRNOG00000019381"; transcript_id "rnCircRNA-62"; exon_number "1" gene_name "Eri3"; gene_biotype "protein_coding"; oId "lv:circEri3-942-002|ce:circEri3-3447-001|ts:circEri3-6414-018"; tissue "lv|ce|ts";
5	ncSplice	exon	140233623	140233682	.	+	.	gene_id "ENSRNOG00000019381"; transcript_id "rnCircRNA-62"; exon_number "2" gene_name "Eri3"; gene_biotype "protein_coding"; oId "lv:circEri3-942-002|ce:circEri3-3447-001|ts:circEri3-6414-018"; tissue "lv|ce|ts";
5	ncSplice	exon	140237123	140237214	.	+	.	gene_id "ENSRNOG00000019381"; transcript_id "rnCircRNA-62"; exon_number "3" gene_name "Eri3"; gene_biotype "protein_coding"; oId "lv:circEri3-942-002|ce:circEri3-3447-001|ts:circEri3-6414-018"; tissue "lv|ce|ts";
5	ncSplice	gene	154517886	154533005	.	+	.	gene_id "ENSRNOG00000010396"; gene_name "Eya3"; gene_source "ncSplice"; gene_biotype "protein_coding";
5	ncSplice	transcript	154517886	154533005	.	+	.	gene_id "ENSRNOG00000010396"; transcript_id "rnCircRNA-63"; gene_name "Eya3"; gene_biotype "protein_coding"; transcript_biotype "circRNA"; oId "lv:circEya3-955-001"; tissue "lv";
5	ncSplice	exon	154517886	154518942	.	+	.	gene_id "ENSRNOG00000010396"; transcript_id "rnCircRNA-63"; exon_number "1" gene_name "Eya3"; gene_biotype "protein_coding"; oId "lv:circEya3-955-001"; tissue "lv";
5	ncSplice	exon	154522616	154522659	.	+	.	gene_id "ENSRNOG00000010396"; transcript_id "rnCircRNA-63"; exon_number "2" gene_name "Eya3"; gene_biotype "protein_coding"; oId "lv:circEya3-955-001"; tissue "lv";
5	ncSplice	exon	154526528	154526607	.	+	.	gene_id "ENSRNOG00000010396"; transcript_id "rnCircRNA-63"; exon_number "3" gene_name "Eya3"; gene_biotype "protein_coding"; oId "lv:circEya3-955-001"; tissue "lv";
5	ncSplice	exon	154529683	154529749	.	+	.	gene_id "ENSRNOG00000010396"; transcript_id "rnCircRNA-63"; exon_number "4" gene_name "Eya3"; gene_biotype "protein_coding"; oId "lv:circEya3-955-001"; tissue "lv";
5	ncSplice	exon	154532869	154533005	.	+	.	gene_id "ENSRNOG00000010396"; transcript_id "rnCircRNA-63"; exon_number "5" gene_name "Eya3"; gene_biotype "protein_coding"; oId "lv:circEya3-955-001"; tissue "lv";
5	ncSplice	gene	161810562	161813294	.	+	.	gene_id "ENSRNOG00000042920"; gene_name "Tas1r2"; gene_source "ncSplice"; gene_biotype "protein_coding";
5	ncSplice	transcript	161810562	161813294	.	+	.	gene_id "ENSRNOG00000042920"; transcript_id "rnCircRNA-64"; gene_name "Tas1r2"; gene_biotype "protein_coding"; transcript_biotype "circRNA"; oId "lv:circTas1r2-961-001"; tissue "lv";
5	ncSplice	exon	161810562	161810657	.	+	.	gene_id "ENSRNOG00000042920"; transcript_id "rnCircRNA-64"; exon_number "1" gene_name "Tas1r2"; gene_biotype "protein_coding"; oId "lv:circTas1r2-961-001"; tissue "lv";
5	ncSplice	exon	161811993	161812133	.	+	.	gene_id "ENSRNOG00000042920"; transcript_id "rnCircRNA-64"; exon_number "2" gene_name "Tas1r2"; gene_biotype "protein_coding"; oId "lv:circTas1r2-961-001"; tissue "lv";
5	ncSplice	exon	161813155	161813294	.	+	.	gene_id "ENSRNOG00000042920"; transcript_id "rnCircRNA-64"; exon_number "3" gene_name "Tas1r2"; gene_biotype "protein_coding"; oId "lv:circTas1r2-961-001"; tissue "lv";
5	ncSplice	gene	40693869	40700209	.	+	.	gene_id "ENSRNOG00000009974"; gene_name "Coq3"; gene_source "ncSplice"; gene_biotype "protein_coding";
5	ncSplice	transcript	40693869	40700209	.	+	.	gene_id "ENSRNOG00000009974"; transcript_id "rnCircRNA-65"; gene_name "Coq3"; gene_biotype "protein_coding"; transcript_biotype "circRNA"; oId "lv:circCoq3-979-001|ts:circCoq3-6649-001"; tissue "lv|ts";
5	ncSplice	exon	40693869	40693995	.	+	.	gene_id "ENSRNOG00000009974"; transcript_id "rnCircRNA-65"; exon_number "1" gene_name "Coq3"; gene_biotype "protein_coding"; oId "lv:circCoq3-979-001|ts:circCoq3-6649-001"; tissue "lv|ts";
5	ncSplice	exon	40696959	40697108	.	+	.	gene_id "ENSRNOG00000009974"; transcript_id "rnCircRNA-65"; exon_number "2" gene_name "Coq3"; gene_biotype "protein_coding"; oId "lv:circCoq3-979-001|ts:circCoq3-6649-001"; tissue "lv|ts";
5	ncSplice	exon	40698383	40698482	.	+	.	gene_id "ENSRNOG00000009974"; transcript_id "rnCircRNA-65"; exon_number "3" gene_name "Coq3"; gene_biotype "protein_coding"; oId "lv:circCoq3-979-001|ts:circCoq3-6649-001"; tissue "lv|ts";
5	ncSplice	exon	40699974	40700209	.	+	.	gene_id "ENSRNOG00000009974"; transcript_id "rnCircRNA-65"; exon_number "4" gene_name "Coq3"; gene_biotype "protein_coding"; oId "lv:circCoq3-979-001|ts:circCoq3-6649-001"; tissue "lv|ts";
5	ncSplice	gene	95175347	95177573	.	+	.	gene_id "5:95175346:95177573:1"; gene_name "5:95175346:95177573:1"; gene_source "ncSplice"; gene_biotype "novel";
5	ncSplice	transcript	95175347	95177573	.	+	.	gene_id "5:95175346:95177573:1"; transcript_id "rnCircRNA-66"; gene_name "5:95175346:95177573:1"; gene_biotype "novel"; transcript_biotype "circRNA"; oId "lv:circ5:95175346:95177573:1-991-001|ts:circ5:95175346:95177573:1-6758-001"; tissue "lv|ts";
5	ncSplice	exon	95175347	95175630	.	+	.	gene_id "5:95175346:95177573:1"; transcript_id "rnCircRNA-66"; exon_number "1" gene_name "5:95175346:95177573:1"; gene_biotype "novel"; oId "lv:circ5:95175346:95177573:1-991-001|ts:circ5:95175346:95177573:1-6758-001"; tissue "lv|ts";
5	ncSplice	exon	95177384	95177573	.	+	.	gene_id "5:95175346:95177573:1"; transcript_id "rnCircRNA-66"; exon_number "2" gene_name "5:95175346:95177573:1"; gene_biotype "novel"; oId "lv:circ5:95175346:95177573:1-991-001|ts:circ5:95175346:95177573:1-6758-001"; tissue "lv|ts";
5	ncSplice	gene	95175365	95177573	.	+	.	gene_id "5:95175364:95177573:1"; gene_name "5:95175364:95177573:1"; gene_source "ncSplice"; gene_biotype "novel";
5	ncSplice	transcript	95175365	95177573	.	+	.	gene_id "5:95175364:95177573:1"; transcript_id "rnCircRNA-67"; gene_name "5:95175364:95177573:1"; gene_biotype "novel"; transcript_biotype "circRNA"; oId "lv:circ5:95175364:95177573:1-992-001"; tissue "lv";
5	ncSplice	exon	95175365	95175630	.	+	.	gene_id "5:95175364:95177573:1"; transcript_id "rnCircRNA-67"; exon_number "1" gene_name "5:95175364:95177573:1"; gene_biotype "novel"; oId "lv:circ5:95175364:95177573:1-992-001"; tissue "lv";
5	ncSplice	exon	95177384	95177573	.	+	.	gene_id "5:95175364:95177573:1"; transcript_id "rnCircRNA-67"; exon_number "2" gene_name "5:95175364:95177573:1"; gene_biotype "novel"; oId "lv:circ5:95175364:95177573:1-992-001"; tissue "lv";
6	ncSplice	gene	153148015	153205888	.	+	.	gene_id "ENSRNOG00000032391"; gene_name "Esyt2"; gene_source "ncSplice"; gene_biotype "protein_coding";
6	ncSplice	transcript	153148015	153205888	.	+	.	gene_id "ENSRNOG00000032391"; transcript_id "rnCircRNA-68"; gene_name "Esyt2"; gene_biotype "protein_coding"; transcript_biotype "circRNA"; oId "lv:circEsyt2-1023-001"; tissue "lv";
6	ncSplice	exon	153148015	153148070	.	+	.	gene_id "ENSRNOG00000032391"; transcript_id "rnCircRNA-68"; exon_number "1" gene_name "Esyt2"; gene_biotype "protein_coding"; oId "lv:circEsyt2-1023-001"; tissue "lv";
6	ncSplice	exon	153153353	153153473	.	+	.	gene_id "ENSRNOG00000032391"; transcript_id "rnCircRNA-68"; exon_number "2" gene_name "Esyt2"; gene_biotype "protein_coding"; oId "lv:circEsyt2-1023-001"; tissue "lv";
6	ncSplice	exon	153155844	153156020	.	+	.	gene_id "ENSRNOG00000032391"; transcript_id "rnCircRNA-68"; exon_number "3" gene_name "Esyt2"; gene_biotype "protein_coding"; oId "lv:circEsyt2-1023-001"; tissue "lv";
6	ncSplice	exon	153157216	153157298	.	+	.	gene_id "ENSRNOG00000032391"; transcript_id "rnCircRNA-68"; exon_number "4" gene_name "Esyt2"; gene_biotype "protein_coding"; oId "lv:circEsyt2-1023-001"; tissue "lv";
6	ncSplice	exon	153160201	153160249	.	+	.	gene_id "ENSRNOG00000032391"; transcript_id "rnCircRNA-68"; exon_number "5" gene_name "Esyt2"; gene_biotype "protein_coding"; oId "lv:circEsyt2-1023-001"; tissue "lv";
6	ncSplice	exon	153161407	153161496	.	+	.	gene_id "ENSRNOG00000032391"; transcript_id "rnCircRNA-68"; exon_number "6" gene_name "Esyt2"; gene_biotype "protein_coding"; oId "lv:circEsyt2-1023-001"; tissue "lv";
6	ncSplice	exon	153161955	153162050	.	+	.	gene_id "ENSRNOG00000032391"; transcript_id "rnCircRNA-68"; exon_number "7" gene_name "Esyt2"; gene_biotype "protein_coding"; oId "lv:circEsyt2-1023-001"; tissue "lv";
6	ncSplice	exon	153170547	153170621	.	+	.	gene_id "ENSRNOG00000032391"; transcript_id "rnCircRNA-68"; exon_number "8" gene_name "Esyt2"; gene_biotype "protein_coding"; oId "lv:circEsyt2-1023-001"; tissue "lv";
6	ncSplice	exon	153171275	153171361	.	+	.	gene_id "ENSRNOG00000032391"; transcript_id "rnCircRNA-68"; exon_number "9" gene_name "Esyt2"; gene_biotype "protein_coding"; oId "lv:circEsyt2-1023-001"; tissue "lv";
6	ncSplice	exon	153175312	153175461	.	+	.	gene_id "ENSRNOG00000032391"; transcript_id "rnCircRNA-68"; exon_number "10" gene_name "Esyt2"; gene_biotype "protein_coding"; oId "lv:circEsyt2-1023-001"; tissue "lv";
6	ncSplice	exon	153177435	153177808	.	+	.	gene_id "ENSRNOG00000032391"; transcript_id "rnCircRNA-68"; exon_number "11" gene_name "Esyt2"; gene_biotype "protein_coding"; oId "lv:circEsyt2-1023-001"; tissue "lv";
6	ncSplice	exon	153178741	153179685	.	+	.	gene_id "ENSRNOG00000032391"; transcript_id "rnCircRNA-68"; exon_number "12" gene_name "Esyt2"; gene_biotype "protein_coding"; oId "lv:circEsyt2-1023-001"; tissue "lv";
6	ncSplice	exon	153180493	153180598	.	+	.	gene_id "ENSRNOG00000032391"; transcript_id "rnCircRNA-68"; exon_number "13" gene_name "Esyt2"; gene_biotype "protein_coding"; oId "lv:circEsyt2-1023-001"; tissue "lv";
6	ncSplice	exon	153181767	153205047	.	+	.	gene_id "ENSRNOG00000032391"; transcript_id "rnCircRNA-68"; exon_number "14" gene_name "Esyt2"; gene_biotype "protein_coding"; oId "lv:circEsyt2-1023-001"; tissue "lv";
6	ncSplice	exon	153205521	153205593	.	+	.	gene_id "ENSRNOG00000032391"; transcript_id "rnCircRNA-68"; exon_number "15" gene_name "Esyt2"; gene_biotype "protein_coding"; oId "lv:circEsyt2-1023-001"; tissue "lv";
6	ncSplice	exon	153205799	153205888	.	+	.	gene_id "ENSRNOG00000032391"; transcript_id "rnCircRNA-68"; exon_number "16" gene_name "Esyt2"; gene_biotype "protein_coding"; oId "lv:circEsyt2-1023-001"; tissue "lv";
6	ncSplice	gene	20909000	20911767	.	+	.	gene_id "ENSRNOG00000014879"; gene_name "Ttc7a"; gene_source "ncSplice"; gene_biotype "protein_coding";
6	ncSplice	transcript	20909000	20911767	.	+	.	gene_id "ENSRNOG00000014879"; transcript_id "rnCircRNA-69"; gene_name "Ttc7a"; gene_biotype "protein_coding"; transcript_biotype "circRNA"; oId "lv:circTtc7a-1024-001"; tissue "lv";
6	ncSplice	exon	20909000	20909163	.	+	.	gene_id "ENSRNOG00000014879"; transcript_id "rnCircRNA-69"; exon_number "1" gene_name "Ttc7a"; gene_biotype "protein_coding"; oId "lv:circTtc7a-1024-001"; tissue "lv";
6	ncSplice	exon	20911599	20911767	.	+	.	gene_id "ENSRNOG00000014879"; transcript_id "rnCircRNA-69"; exon_number "2" gene_name "Ttc7a"; gene_biotype "protein_coding"; oId "lv:circTtc7a-1024-001"; tissue "lv";
6	ncSplice	gene	64146385	64154268	.	+	.	gene_id "ENSRNOG00000004186"; gene_name "Snx13"; gene_source "ncSplice"; gene_biotype "protein_coding";
6	ncSplice	transcript	64146385	64154268	.	+	.	gene_id "ENSRNOG00000004186"; transcript_id "rnCircRNA-70"; gene_name "Snx13"; gene_biotype "protein_coding"; transcript_biotype "circRNA"; oId "lv:circSnx13-1046-007|ce:circSnx13-3952-001|ts:circSnx13-7220-019"; tissue "lv|ce|ts";
6	ncSplice	exon	64146385	64146497	.	+	.	gene_id "ENSRNOG00000004186"; transcript_id "rnCircRNA-70"; exon_number "1" gene_name "Snx13"; gene_biotype "protein_coding"; oId "lv:circSnx13-1046-007|ce:circSnx13-3952-001|ts:circSnx13-7220-019"; tissue "lv|ce|ts";
6	ncSplice	exon	64150285	64150387	.	+	.	gene_id "ENSRNOG00000004186"; transcript_id "rnCircRNA-70"; exon_number "2" gene_name "Snx13"; gene_biotype "protein_coding"; oId "lv:circSnx13-1046-007|ce:circSnx13-3952-001|ts:circSnx13-7220-019"; tissue "lv|ce|ts";
6	ncSplice	exon	64153106	64153195	.	+	.	gene_id "ENSRNOG00000004186"; transcript_id "rnCircRNA-70"; exon_number "3" gene_name "Snx13"; gene_biotype "protein_coding"; oId "lv:circSnx13-1046-007|ce:circSnx13-3952-001|ts:circSnx13-7220-019"; tissue "lv|ce|ts";
6	ncSplice	exon	64154147	64154268	.	+	.	gene_id "ENSRNOG00000004186"; transcript_id "rnCircRNA-70"; exon_number "4" gene_name "Snx13"; gene_biotype "protein_coding"; oId "lv:circSnx13-1046-007|ce:circSnx13-3952-001|ts:circSnx13-7220-019"; tissue "lv|ce|ts";
6	ncSplice	gene	82101783	82102215	.	-	.	gene_id "ENSRNOG00000006905"; gene_name "Hectd1"; gene_source "ncSplice"; gene_biotype "protein_coding";
6	ncSplice	transcript	82101783	82102215	.	-	.	gene_id "ENSRNOG00000006905"; transcript_id "rnCircRNA-71"; gene_name "Hectd1"; gene_biotype "protein_coding"; transcript_biotype "circRNA"; oId "lv:circHectd1-1054-001|ce:circHectd1-3986-001|ts:circHectd1-7257-001"; tissue "lv|ce|ts";
6	ncSplice	exon	82101783	82101959	.	-	.	gene_id "ENSRNOG00000006905"; transcript_id "rnCircRNA-71"; exon_number "1" gene_name "Hectd1"; gene_biotype "protein_coding"; oId "lv:circHectd1-1054-001|ce:circHectd1-3986-001|ts:circHectd1-7257-001"; tissue "lv|ce|ts";
6	ncSplice	exon	82102049	82102215	.	-	.	gene_id "ENSRNOG00000006905"; transcript_id "rnCircRNA-71"; exon_number "2" gene_name "Hectd1"; gene_biotype "protein_coding"; oId "lv:circHectd1-1054-001|ce:circHectd1-3986-001|ts:circHectd1-7257-001"; tissue "lv|ce|ts";
7	ncSplice	gene	65178356	65180004	.	-	.	gene_id "ENSRNOG00000004226"; gene_name "Irak3"; gene_source "ncSplice"; gene_biotype "protein_coding";
7	ncSplice	transcript	65178356	65180004	.	-	.	gene_id "ENSRNOG00000004226"; transcript_id "rnCircRNA-72"; gene_name "Irak3"; gene_biotype "protein_coding"; transcript_biotype "circRNA"; oId "lv:circIrak3-1108-001"; tissue "lv";
7	ncSplice	exon	65178356	65178510	.	-	.	gene_id "ENSRNOG00000004226"; transcript_id "rnCircRNA-72"; exon_number "1" gene_name "Irak3"; gene_biotype "protein_coding"; oId "lv:circIrak3-1108-001"; tissue "lv";
7	ncSplice	exon	65179304	65179358	.	-	.	gene_id "ENSRNOG00000004226"; transcript_id "rnCircRNA-72"; exon_number "2" gene_name "Irak3"; gene_biotype "protein_coding"; oId "lv:circIrak3-1108-001"; tissue "lv";
7	ncSplice	exon	65179901	65180004	.	-	.	gene_id "ENSRNOG00000004226"; transcript_id "rnCircRNA-72"; exon_number "3" gene_name "Irak3"; gene_biotype "protein_coding"; oId "lv:circIrak3-1108-001"; tissue "lv";
7	ncSplice	gene	66959490	66960732	.	+	.	gene_id "ENSRNOG00000004185"; gene_name "Mon2"; gene_source "ncSplice"; gene_biotype "protein_coding";
7	ncSplice	transcript	66959490	66960732	.	+	.	gene_id "ENSRNOG00000004185"; transcript_id "rnCircRNA-73"; gene_name "Mon2"; gene_biotype "protein_coding"; transcript_biotype "circRNA"; oId "lv:circMon2-1109-001|ce:circMon2-4179-001"; tissue "lv|ce";
7	ncSplice	exon	66959490	66959591	.	+	.	gene_id "ENSRNOG00000004185"; transcript_id "rnCircRNA-73"; exon_number "1" gene_name "Mon2"; gene_biotype "protein_coding"; oId "lv:circMon2-1109-001|ce:circMon2-4179-001"; tissue "lv|ce";
7	ncSplice	exon	66960622	66960732	.	+	.	gene_id "ENSRNOG00000004185"; transcript_id "rnCircRNA-73"; exon_number "2" gene_name "Mon2"; gene_biotype "protein_coding"; oId "lv:circMon2-1109-001|ce:circMon2-4179-001"; tissue "lv|ce";
7	ncSplice	gene	74005547	74020374	.	-	.	gene_id "ENSRNOG00000011278"; gene_name "Stk3"; gene_source "ncSplice"; gene_biotype "protein_coding";
7	ncSplice	transcript	74005547	74020374	.	-	.	gene_id "ENSRNOG00000011278"; transcript_id "rnCircRNA-74"; gene_name "Stk3"; gene_biotype "protein_coding"; transcript_biotype "circRNA"; oId "lv:circStk3-1115-001|ce:circStk3-4197-001|ts:circStk3-7767-001"; tissue "lv|ce|ts";
7	ncSplice	exon	74005547	74005661	.	-	.	gene_id "ENSRNOG00000011278"; transcript_id "rnCircRNA-74"; exon_number "1" gene_name "Stk3"; gene_biotype "protein_coding"; oId "lv:circStk3-1115-001|ce:circStk3-4197-001|ts:circStk3-7767-001"; tissue "lv|ce|ts";
7	ncSplice	exon	74018145	74018273	.	-	.	gene_id "ENSRNOG00000011278"; transcript_id "rnCircRNA-74"; exon_number "2" gene_name "Stk3"; gene_biotype "protein_coding"; oId "lv:circStk3-1115-001|ce:circStk3-4197-001|ts:circStk3-7767-001"; tissue "lv|ce|ts";
7	ncSplice	exon	74020294	74020374	.	-	.	gene_id "ENSRNOG00000011278"; transcript_id "rnCircRNA-74"; exon_number "3" gene_name "Stk3"; gene_biotype "protein_coding"; oId "lv:circStk3-1115-001|ce:circStk3-4197-001|ts:circStk3-7767-001"; tissue "lv|ce|ts";
9	ncSplice	gene	113443355	113449920	.	+	.	gene_id "ENSRNOG00000012504"; gene_name "Wash"; gene_source "ncSplice"; gene_biotype "protein_coding";
9	ncSplice	transcript	113443355	113449920	.	+	.	gene_id "ENSRNOG00000012504"; transcript_id "rnCircRNA-75"; gene_name "Wash"; gene_biotype "protein_coding"; transcript_biotype "circRNA"; oId "lv:circWash-1199-003"; tissue "lv";
9	ncSplice	exon	113443355	113443466	.	+	.	gene_id "ENSRNOG00000012504"; transcript_id "rnCircRNA-75"; exon_number "1" gene_name "Wash"; gene_biotype "protein_coding"; oId "lv:circWash-1199-003"; tissue "lv";
9	ncSplice	exon	113443641	113443787	.	+	.	gene_id "ENSRNOG00000012504"; transcript_id "rnCircRNA-75"; exon_number "2" gene_name "Wash"; gene_biotype "protein_coding"; oId "lv:circWash-1199-003"; tissue "lv";
9	ncSplice	exon	113443948	113445914	.	+	.	gene_id "ENSRNOG00000012504"; transcript_id "rnCircRNA-75"; exon_number "3" gene_name "Wash"; gene_biotype "protein_coding"; oId "lv:circWash-1199-003"; tissue "lv";
9	ncSplice	exon	113449767	113449920	.	+	.	gene_id "ENSRNOG00000012504"; transcript_id "rnCircRNA-75"; exon_number "4" gene_name "Wash"; gene_biotype "protein_coding"; oId "lv:circWash-1199-003"; tissue "lv";
9	ncSplice	gene	3989895	3992480	.	-	.	gene_id "ENSRNOG00000011269"; gene_name "Sult1c3"; gene_source "ncSplice"; gene_biotype "protein_coding";
9	ncSplice	transcript	3989895	3992480	.	-	.	gene_id "ENSRNOG00000011269"; transcript_id "rnCircRNA-76"; gene_name "Sult1c3"; gene_biotype "protein_coding"; transcript_biotype "circRNA"; oId "lv:circSult1c3-1216-001"; tissue "lv";
9	ncSplice	exon	3989895	3989992	.	-	.	gene_id "ENSRNOG00000011269"; transcript_id "rnCircRNA-76"; exon_number "1" gene_name "Sult1c3"; gene_biotype "protein_coding"; oId "lv:circSult1c3-1216-001"; tissue "lv";
9	ncSplice	exon	3990364	3992480	.	-	.	gene_id "ENSRNOG00000011269"; transcript_id "rnCircRNA-76"; exon_number "2" gene_name "Sult1c3"; gene_biotype "protein_coding"; oId "lv:circSult1c3-1216-001"; tissue "lv";
9	ncSplice	gene	65783993	65787865	.	-	.	gene_id "ENSRNOG00000023280"; gene_name "Als2"; gene_source "ncSplice"; gene_biotype "protein_coding";
9	ncSplice	transcript	65783993	65787865	.	-	.	gene_id "ENSRNOG00000023280"; transcript_id "rnCircRNA-77"; gene_name "Als2"; gene_biotype "protein_coding"; transcript_biotype "circRNA"; oId "lv:circAls2-1228-001|ce:circAls2-4781-001"; tissue "lv|ce";
9	ncSplice	exon	65783993	65784070	.	-	.	gene_id "ENSRNOG00000023280"; transcript_id "rnCircRNA-77"; exon_number "1" gene_name "Als2"; gene_biotype "protein_coding"; oId "lv:circAls2-1228-001|ce:circAls2-4781-001"; tissue "lv|ce";
9	ncSplice	exon	65784417	65784528	.	-	.	gene_id "ENSRNOG00000023280"; transcript_id "rnCircRNA-77"; exon_number "2" gene_name "Als2"; gene_biotype "protein_coding"; oId "lv:circAls2-1228-001|ce:circAls2-4781-001"; tissue "lv|ce";
9	ncSplice	exon	65787110	65787274	.	-	.	gene_id "ENSRNOG00000023280"; transcript_id "rnCircRNA-77"; exon_number "3" gene_name "Als2"; gene_biotype "protein_coding"; oId "lv:circAls2-1228-001|ce:circAls2-4781-001"; tissue "lv|ce";
9	ncSplice	exon	65787767	65787865	.	-	.	gene_id "ENSRNOG00000023280"; transcript_id "rnCircRNA-77"; exon_number "4" gene_name "Als2"; gene_biotype "protein_coding"; oId "lv:circAls2-1228-001|ce:circAls2-4781-001"; tissue "lv|ce";
9	ncSplice	gene	73140316	73143700	.	-	.	gene_id "ENSRNOG00000013704"; gene_name "Cps1"; gene_source "ncSplice"; gene_biotype "protein_coding";
9	ncSplice	transcript	73140316	73143700	.	-	.	gene_id "ENSRNOG00000013704"; transcript_id "rnCircRNA-78"; gene_name "Cps1"; gene_biotype "protein_coding"; transcript_biotype "circRNA"; oId "lv:circCps1-1236-001"; tissue "lv";
9	ncSplice	exon	73140316	73140505	.	-	.	gene_id "ENSRNOG00000013704"; transcript_id "rnCircRNA-78"; exon_number "1" gene_name "Cps1"; gene_biotype "protein_coding"; oId "lv:circCps1-1236-001"; tissue "lv";
9	ncSplice	exon	73141808	73141903	.	-	.	gene_id "ENSRNOG00000013704"; transcript_id "rnCircRNA-78"; exon_number "2" gene_name "Cps1"; gene_biotype "protein_coding"; oId "lv:circCps1-1236-001"; tissue "lv";
9	ncSplice	exon	73143602	73143700	.	-	.	gene_id "ENSRNOG00000013704"; transcript_id "rnCircRNA-78"; exon_number "3" gene_name "Cps1"; gene_biotype "protein_coding"; oId "lv:circCps1-1236-001"; tissue "lv";
9	ncSplice	gene	94185441	94202884	.	+	.	gene_id "ENSRNOG00000023577"; gene_name "Gigyf2"; gene_source "ncSplice"; gene_biotype "protein_coding";
9	ncSplice	transcript	94185441	94202884	.	+	.	gene_id "ENSRNOG00000023577"; transcript_id "rnCircRNA-79"; gene_name "Gigyf2"; gene_biotype "protein_coding"; transcript_biotype "circRNA"; oId "lv:circGigyf2-1250-002|ce:circGigyf2-4853-002|ts:circGigyf2-8952-007"; tissue "lv|ce|ts";
9	ncSplice	exon	94185441	94185570	.	+	.	gene_id "ENSRNOG00000023577"; transcript_id "rnCircRNA-79"; exon_number "1" gene_name "Gigyf2"; gene_biotype "protein_coding"; oId "lv:circGigyf2-1250-002|ce:circGigyf2-4853-002|ts:circGigyf2-8952-007"; tissue "lv|ce|ts";
9	ncSplice	exon	94186498	94186593	.	+	.	gene_id "ENSRNOG00000023577"; transcript_id "rnCircRNA-79"; exon_number "2" gene_name "Gigyf2"; gene_biotype "protein_coding"; oId "lv:circGigyf2-1250-002|ce:circGigyf2-4853-002|ts:circGigyf2-8952-007"; tissue "lv|ce|ts";
9	ncSplice	exon	94196489	94196603	.	+	.	gene_id "ENSRNOG00000023577"; transcript_id "rnCircRNA-79"; exon_number "3" gene_name "Gigyf2"; gene_biotype "protein_coding"; oId "lv:circGigyf2-1250-002|ce:circGigyf2-4853-002|ts:circGigyf2-8952-007"; tissue "lv|ce|ts";
9	ncSplice	exon	94201846	94201957	.	+	.	gene_id "ENSRNOG00000023577"; transcript_id "rnCircRNA-79"; exon_number "4" gene_name "Gigyf2"; gene_biotype "protein_coding"; oId "lv:circGigyf2-1250-002|ce:circGigyf2-4853-002|ts:circGigyf2-8952-007"; tissue "lv|ce|ts";
9	ncSplice	exon	94202844	94202884	.	+	.	gene_id "ENSRNOG00000023577"; transcript_id "rnCircRNA-79"; exon_number "5" gene_name "Gigyf2"; gene_biotype "protein_coding"; oId "lv:circGigyf2-1250-002|ce:circGigyf2-4853-002|ts:circGigyf2-8952-007"; tissue "lv|ce|ts";
X	ncSplice	gene	75978468	75978911	.	-	.	gene_id "ENSRNOG00000002790"; gene_name "Abcb7"; gene_source "ncSplice"; gene_biotype "protein_coding";
X	ncSplice	transcript	75978468	75978911	.	-	.	gene_id "ENSRNOG00000002790"; transcript_id "rnCircRNA-80"; gene_name "Abcb7"; gene_biotype "protein_coding"; transcript_biotype "circRNA"; oId "lv:circAbcb7-1276-001"; tissue "lv";
X	ncSplice	exon	75978468	75978597	.	-	.	gene_id "ENSRNOG00000002790"; transcript_id "rnCircRNA-80"; exon_number "1" gene_name "Abcb7"; gene_biotype "protein_coding"; oId "lv:circAbcb7-1276-001"; tissue "lv";
X	ncSplice	exon	75978761	75978911	.	-	.	gene_id "ENSRNOG00000002790"; transcript_id "rnCircRNA-80"; exon_number "2" gene_name "Abcb7"; gene_biotype "protein_coding"; oId "lv:circAbcb7-1276-001"; tissue "lv";
1	ncSplice	gene	153723762	153729602	.	-	.	gene_id "1:153723761:153729602:-1"; gene_name "1:153723761:153729602:-1"; gene_source "ncSplice"; gene_biotype "novel";
1	ncSplice	transcript	153723762	153729602	.	-	.	gene_id "1:153723761:153729602:-1"; transcript_id "rnCircRNA-81"; gene_name "1:153723761:153729602:-1"; gene_biotype "novel"; transcript_biotype "circRNA"; oId "lv:circ1:153723761:153729602:-1-1291-001"; tissue "lv";
1	ncSplice	exon	153723762	153729602	.	-	.	gene_id "1:153723761:153729602:-1"; transcript_id "rnCircRNA-81"; exon_number "1" gene_name "1:153723761:153729602:-1"; gene_biotype "novel"; oId "lv:circ1:153723761:153729602:-1-1291-001"; tissue "lv";
1	ncSplice	gene	153989059	154006105	.	+	.	gene_id "ENSRNOG00000024016"; gene_name "Cyp2c6v1"; gene_source "ncSplice"; gene_biotype "protein_coding";
1	ncSplice	transcript	153989059	154006105	.	+	.	gene_id "ENSRNOG00000024016"; transcript_id "rnCircRNA-82"; gene_name "Cyp2c6v1"; gene_biotype "protein_coding"; transcript_biotype "circRNA"; oId "lv:circCyp2c6v1-1292-001"; tissue "lv";
1	ncSplice	exon	153989059	154006105	.	+	.	gene_id "ENSRNOG00000024016"; transcript_id "rnCircRNA-82"; exon_number "1" gene_name "Cyp2c6v1"; gene_biotype "protein_coding"; oId "lv:circCyp2c6v1-1292-001"; tissue "lv";
1	ncSplice	gene	222800407	222801671	.	-	.	gene_id "1:222800406:222801671:-1"; gene_name "1:222800406:222801671:-1"; gene_source "ncSplice"; gene_biotype "novel";
1	ncSplice	transcript	222800407	222801671	.	-	.	gene_id "1:222800406:222801671:-1"; transcript_id "rnCircRNA-83"; gene_name "1:222800406:222801671:-1"; gene_biotype "novel"; transcript_biotype "circRNA"; oId "lv:circ1:222800406:222801671:-1-1310-001|ce:circ1:222800406:222801671:-1-5101-001"; tissue "lv|ce";
1	ncSplice	exon	222800407	222801671	.	-	.	gene_id "1:222800406:222801671:-1"; transcript_id "rnCircRNA-83"; exon_number "1" gene_name "1:222800406:222801671:-1"; gene_biotype "novel"; oId "lv:circ1:222800406:222801671:-1-1310-001|ce:circ1:222800406:222801671:-1-5101-001"; tissue "lv|ce";
1	ncSplice	gene	222811790	222838680	.	-	.	gene_id "1:222811789:222838680:-1"; gene_name "1:222811789:222838680:-1"; gene_source "ncSplice"; gene_biotype "novel";
1	ncSplice	transcript	222811790	222838680	.	-	.	gene_id "1:222811789:222838680:-1"; transcript_id "rnCircRNA-84"; gene_name "1:222811789:222838680:-1"; gene_biotype "novel"; transcript_biotype "circRNA"; oId "lv:circ1:222811789:222838680:-1-1311-001"; tissue "lv";
1	ncSplice	exon	222811790	222838680	.	-	.	gene_id "1:222811789:222838680:-1"; transcript_id "rnCircRNA-84"; exon_number "1" gene_name "1:222811789:222838680:-1"; gene_biotype "novel"; oId "lv:circ1:222811789:222838680:-1-1311-001"; tissue "lv";
1	ncSplice	gene	222828337	222838682	.	-	.	gene_id "1:222828336:222838682:-1"; gene_name "1:222828336:222838682:-1"; gene_source "ncSplice"; gene_biotype "novel";
1	ncSplice	transcript	222828337	222838682	.	-	.	gene_id "1:222828336:222838682:-1"; transcript_id "rnCircRNA-85"; gene_name "1:222828336:222838682:-1"; gene_biotype "novel"; transcript_biotype "circRNA"; oId "lv:circ1:222828336:222838682:-1-1312-001|ts:circ1:222828336:222838682:-1-9185-001"; tissue "lv|ts";
1	ncSplice	exon	222828337	222838682	.	-	.	gene_id "1:222828336:222838682:-1"; transcript_id "rnCircRNA-85"; exon_number "1" gene_name "1:222828336:222838682:-1"; gene_biotype "novel"; oId "lv:circ1:222828336:222838682:-1-1312-001|ts:circ1:222828336:222838682:-1-9185-001"; tissue "lv|ts";
1	ncSplice	gene	231395404	231440295	.	-	.	gene_id "ENSRNOG00000049826"; gene_name "Ust5r"; gene_source "ncSplice"; gene_biotype "protein_coding";
1	ncSplice	transcript	231395404	231440295	.	-	.	gene_id "ENSRNOG00000049826"; transcript_id "rnCircRNA-86"; gene_name "Ust5r"; gene_biotype "protein_coding"; transcript_biotype "circRNA"; oId "lv:circUst5r-1321-001"; tissue "lv";
1	ncSplice	exon	231395404	231440295	.	-	.	gene_id "ENSRNOG00000049826"; transcript_id "rnCircRNA-86"; exon_number "1" gene_name "Ust5r"; gene_biotype "protein_coding"; oId "lv:circUst5r-1321-001"; tissue "lv";
10	ncSplice	gene	105912686	105913324	.	+	.	gene_id "ENSRNOG00000002807"; gene_name "Sept9"; gene_source "ncSplice"; gene_biotype "protein_coding";
10	ncSplice	transcript	105912686	105913324	.	+	.	gene_id "ENSRNOG00000002807"; transcript_id "rnCircRNA-87"; gene_name "Sept9"; gene_biotype "protein_coding"; transcript_biotype "circRNA"; oId "lv:circSept9-1345-001"; tissue "lv";
10	ncSplice	exon	105912686	105913324	.	+	.	gene_id "ENSRNOG00000002807"; transcript_id "rnCircRNA-87"; exon_number "1" gene_name "Sept9"; gene_biotype "protein_coding"; oId "lv:circSept9-1345-001"; tissue "lv";
10	ncSplice	gene	37537309	37537814	.	+	.	gene_id "ENSRNOG00000006148"; gene_name "RGD1310352"; gene_source "ncSplice"; gene_biotype "protein_coding";
10	ncSplice	transcript	37537309	37537814	.	+	.	gene_id "ENSRNOG00000006148"; transcript_id "rnCircRNA-88"; gene_name "RGD1310352"; gene_biotype "protein_coding"; transcript_biotype "circRNA"; oId "lv:circRGD1310352-1351-001|ce:circRGD1310352-5211-001|ts:circRGD1310352-9280-001"; tissue "lv|ce|ts";
10	ncSplice	exon	37537309	37537814	.	+	.	gene_id "ENSRNOG00000006148"; transcript_id "rnCircRNA-88"; exon_number "1" gene_name "RGD1310352"; gene_biotype "protein_coding"; oId "lv:circRGD1310352-1351-001|ce:circRGD1310352-5211-001|ts:circRGD1310352-9280-001"; tissue "lv|ce|ts";
11	ncSplice	gene	84472937	84510953	.	-	.	gene_id "ENSRNOG00000031231"; gene_name "Kng2"; gene_source "ncSplice"; gene_biotype "protein_coding";
11	ncSplice	transcript	84472937	84510953	.	-	.	gene_id "ENSRNOG00000031231"; transcript_id "rnCircRNA-89"; gene_name "Kng2"; gene_biotype "protein_coding"; transcript_biotype "circRNA"; oId "lv:circKng2-1381-001"; tissue "lv";
11	ncSplice	exon	84472937	84510953	.	-	.	gene_id "ENSRNOG00000031231"; transcript_id "rnCircRNA-89"; exon_number "1" gene_name "Kng2"; gene_biotype "protein_coding"; oId "lv:circKng2-1381-001"; tissue "lv";
12	ncSplice	gene	13734519	13787842	.	-	.	gene_id "ENSRNOG00000032560"; gene_name "Cyp3a23/3a1"; gene_source "ncSplice"; gene_biotype "protein_coding";
12	ncSplice	transcript	13734519	13787842	.	-	.	gene_id "ENSRNOG00000032560"; transcript_id "rnCircRNA-90"; gene_name "Cyp3a23/3a1"; gene_biotype "protein_coding"; transcript_biotype "circRNA"; oId "lv:circCyp3a23/3a1-1388-001"; tissue "lv";
12	ncSplice	exon	13734519	13787842	.	-	.	gene_id "ENSRNOG00000032560"; transcript_id "rnCircRNA-90"; exon_number "1" gene_name "Cyp3a23/3a1"; gene_biotype "protein_coding"; oId "lv:circCyp3a23/3a1-1388-001"; tissue "lv";
13	ncSplice	gene	111153504	111153919	.	+	.	gene_id "ENSRNOG00000002593"; gene_name "Esrrg"; gene_source "ncSplice"; gene_biotype "protein_coding";
13	ncSplice	transcript	111153504	111153919	.	+	.	gene_id "ENSRNOG00000002593"; transcript_id "rnCircRNA-91"; gene_name "Esrrg"; gene_biotype "protein_coding"; transcript_biotype "circRNA"; oId "lv:circEsrrg-1404-001|ce:circEsrrg-5409-001"; tissue "lv|ce";
13	ncSplice	exon	111153504	111153919	.	+	.	gene_id "ENSRNOG00000002593"; transcript_id "rnCircRNA-91"; exon_number "1" gene_name "Esrrg"; gene_biotype "protein_coding"; oId "lv:circEsrrg-1404-001|ce:circEsrrg-5409-001"; tissue "lv|ce";
14	ncSplice	gene	19084882	19086238	.	-	.	gene_id "ENSRNOG00000002911"; gene_name "Alb"; gene_source "ncSplice"; gene_biotype "protein_coding";
14	ncSplice	transcript	19084882	19086238	.	-	.	gene_id "ENSRNOG00000002911"; transcript_id "rnCircRNA-92"; gene_name "Alb"; gene_biotype "protein_coding"; transcript_biotype "circRNA"; oId "lv:circAlb-1423-001"; tissue "lv";
14	ncSplice	exon	19084882	19086238	.	-	.	gene_id "ENSRNOG00000002911"; transcript_id "rnCircRNA-92"; exon_number "1" gene_name "Alb"; gene_biotype "protein_coding"; oId "lv:circAlb-1423-001"; tissue "lv";
14	ncSplice	gene	46825062	46825270	.	+	.	gene_id "ENSRNOG00000049138"; gene_name "AABR06078903.1"; gene_source "ncSplice"; gene_biotype "protein_coding";
14	ncSplice	transcript	46825062	46825270	.	+	.	gene_id "ENSRNOG00000049138"; transcript_id "rnCircRNA-93"; gene_name "AABR06078903.1"; gene_biotype "protein_coding"; transcript_biotype "circRNA"; oId "lv:circAABR06078903.1-1458-001"; tissue "lv";
14	ncSplice	exon	46825062	46825270	.	+	.	gene_id "ENSRNOG00000049138"; transcript_id "rnCircRNA-93"; exon_number "1" gene_name "AABR06078903.1"; gene_biotype "protein_coding"; oId "lv:circAABR06078903.1-1458-001"; tissue "lv";
14	ncSplice	gene	46825271	46826141	.	+	.	gene_id "ENSRNOG00000049138"; gene_name "AABR06078903.1"; gene_source "ncSplice"; gene_biotype "protein_coding";
14	ncSplice	transcript	46825271	46826141	.	+	.	gene_id "ENSRNOG00000049138"; transcript_id "rnCircRNA-94"; gene_name "AABR06078903.1"; gene_biotype "protein_coding"; transcript_biotype "circRNA"; oId "lv:circAABR06078903.1-1460-001"; tissue "lv";
14	ncSplice	exon	46825271	46826141	.	+	.	gene_id "ENSRNOG00000049138"; transcript_id "rnCircRNA-94"; exon_number "1" gene_name "AABR06078903.1"; gene_biotype "protein_coding"; oId "lv:circAABR06078903.1-1460-001"; tissue "lv";
14	ncSplice	gene	46829082	46829519	.	+	.	gene_id "ENSRNOG00000049138"; gene_name "AABR06078903.1"; gene_source "ncSplice"; gene_biotype "protein_coding";
14	ncSplice	transcript	46829082	46829519	.	+	.	gene_id "ENSRNOG00000049138"; transcript_id "rnCircRNA-95"; gene_name "AABR06078903.1"; gene_biotype "protein_coding"; transcript_biotype "circRNA"; oId "lv:circAABR06078903.1-1469-001"; tissue "lv";
14	ncSplice	exon	46829082	46829519	.	+	.	gene_id "ENSRNOG00000049138"; transcript_id "rnCircRNA-95"; exon_number "1" gene_name "AABR06078903.1"; gene_biotype "protein_coding"; oId "lv:circAABR06078903.1-1469-001"; tissue "lv";
15	ncSplice	gene	27736454	27736972	.	+	.	gene_id "ENSRNOG00000010489"; gene_name "Samd4a"; gene_source "ncSplice"; gene_biotype "protein_coding";
15	ncSplice	transcript	27736454	27736972	.	+	.	gene_id "ENSRNOG00000010489"; transcript_id "rnCircRNA-96"; gene_name "Samd4a"; gene_biotype "protein_coding"; transcript_biotype "circRNA"; oId "lv:circSamd4a-1481-001|ce:circSamd4a-5550-001"; tissue "lv|ce";
15	ncSplice	exon	27736454	27736972	.	+	.	gene_id "ENSRNOG00000010489"; transcript_id "rnCircRNA-96"; exon_number "1" gene_name "Samd4a"; gene_biotype "protein_coding"; oId "lv:circSamd4a-1481-001|ce:circSamd4a-5550-001"; tissue "lv|ce";
17	ncSplice	gene	31625925	31626582	.	-	.	gene_id "ENSRNOG00000032215"; gene_name "Cdyl"; gene_source "ncSplice"; gene_biotype "protein_coding";
17	ncSplice	transcript	31625925	31626582	.	-	.	gene_id "ENSRNOG00000032215"; transcript_id "rnCircRNA-97"; gene_name "Cdyl"; gene_biotype "protein_coding"; transcript_biotype "circRNA"; oId "lv:circCdyl-1500-001|ce:circCdyl-5644-001|ts:circCdyl-9630-001"; tissue "lv|ce|ts";
17	ncSplice	exon	31625925	31626582	.	-	.	gene_id "ENSRNOG00000032215"; transcript_id "rnCircRNA-97"; exon_number "1" gene_name "Cdyl"; gene_biotype "protein_coding"; oId "lv:circCdyl-1500-001|ce:circCdyl-5644-001|ts:circCdyl-9630-001"; tissue "lv|ce|ts";
19	ncSplice	gene	36861979	36862510	.	-	.	gene_id "ENSRNOG00000002983"; gene_name "Nfix"; gene_source "ncSplice"; gene_biotype "protein_coding";
19	ncSplice	transcript	36861979	36862510	.	-	.	gene_id "ENSRNOG00000002983"; transcript_id "rnCircRNA-98"; gene_name "Nfix"; gene_biotype "protein_coding"; transcript_biotype "circRNA"; oId "lv:circNfix-1517-001|ce:circNfix-5747-001|ts:circNfix-9756-001"; tissue "lv|ce|ts";
19	ncSplice	exon	36861979	36862510	.	-	.	gene_id "ENSRNOG00000002983"; transcript_id "rnCircRNA-98"; exon_number "1" gene_name "Nfix"; gene_biotype "protein_coding"; oId "lv:circNfix-1517-001|ce:circNfix-5747-001|ts:circNfix-9756-001"; tissue "lv|ce|ts";
3	ncSplice	gene	101032994	101034092	.	-	.	gene_id "ENSRNOG00000011358"; gene_name "Hipk3"; gene_source "ncSplice"; gene_biotype "protein_coding";
3	ncSplice	transcript	101032994	101034092	.	-	.	gene_id "ENSRNOG00000011358"; transcript_id "rnCircRNA-99"; gene_name "Hipk3"; gene_biotype "protein_coding"; transcript_biotype "circRNA"; oId "lv:circHipk3-1572-001|ce:circHipk3-5945-001|ts:circHipk3-9948-001"; tissue "lv|ce|ts";
3	ncSplice	exon	101032994	101034092	.	-	.	gene_id "ENSRNOG00000011358"; transcript_id "rnCircRNA-99"; exon_number "1" gene_name "Hipk3"; gene_biotype "protein_coding"; oId "lv:circHipk3-1572-001|ce:circHipk3-5945-001|ts:circHipk3-9948-001"; tissue "lv|ce|ts";
4	ncSplice	gene	232579119	232579512	.	-	.	gene_id "ENSRNOG00000006338"; gene_name "Lrp6"; gene_source "ncSplice"; gene_biotype "protein_coding";
4	ncSplice	transcript	232579119	232579512	.	-	.	gene_id "ENSRNOG00000006338"; transcript_id "rnCircRNA-100"; gene_name "Lrp6"; gene_biotype "protein_coding"; transcript_biotype "circRNA"; oId "lv:circLrp6-1600-001|ce:circLrp6-6125-001"; tissue "lv|ce";
4	ncSplice	exon	232579119	232579512	.	-	.	gene_id "ENSRNOG00000006338"; transcript_id "rnCircRNA-100"; exon_number "1" gene_name "Lrp6"; gene_biotype "protein_coding"; oId "lv:circLrp6-1600-001|ce:circLrp6-6125-001"; tissue "lv|ce";
5	ncSplice	gene	171084353	171084818	.	+	.	gene_id "ENSRNOG00000017940"; gene_name "Rere"; gene_source "ncSplice"; gene_biotype "protein_coding";
5	ncSplice	transcript	171084353	171084818	.	+	.	gene_id "ENSRNOG00000017940"; transcript_id "rnCircRNA-101"; gene_name "Rere"; gene_biotype "protein_coding"; transcript_biotype "circRNA"; oId "lv:circRere-1616-001|ce:circRere-6225-001"; tissue "lv|ce";
5	ncSplice	exon	171084353	171084818	.	+	.	gene_id "ENSRNOG00000017940"; transcript_id "rnCircRNA-101"; exon_number "1" gene_name "Rere"; gene_biotype "protein_coding"; oId "lv:circRere-1616-001|ce:circRere-6225-001"; tissue "lv|ce";
5	ncSplice	gene	171539312	171540123	.	+	.	gene_id "ENSRNOG00000049653"; gene_name "Errfi1"; gene_source "ncSplice"; gene_biotype "protein_coding";
5	ncSplice	transcript	171539312	171540123	.	+	.	gene_id "ENSRNOG00000049653"; transcript_id "rnCircRNA-102"; gene_name "Errfi1"; gene_biotype "protein_coding"; transcript_biotype "circRNA"; oId "lv:circErrfi1-1617-001"; tissue "lv";
5	ncSplice	exon	171539312	171540123	.	+	.	gene_id "ENSRNOG00000049653"; transcript_id "rnCircRNA-102"; exon_number "1" gene_name "Errfi1"; gene_biotype "protein_coding"; oId "lv:circErrfi1-1617-001"; tissue "lv";
5	ncSplice	gene	81470028	81536085	.	-	.	gene_id "ENSRNOG00000050682"; gene_name "Rn50_5_0815.3"; gene_source "ncSplice"; gene_biotype "unprocessed_pseudogene";
5	ncSplice	transcript	81470028	81536085	.	-	.	gene_id "ENSRNOG00000050682"; transcript_id "rnCircRNA-103"; gene_name "Rn50_5_0815.3"; gene_biotype "unprocessed_pseudogene"; transcript_biotype "circRNA"; oId "lv:circRn50_5_0815.3-1623-001"; tissue "lv";
5	ncSplice	exon	81470028	81536085	.	-	.	gene_id "ENSRNOG00000050682"; transcript_id "rnCircRNA-103"; exon_number "1" gene_name "Rn50_5_0815.3"; gene_biotype "unprocessed_pseudogene"; oId "lv:circRn50_5_0815.3-1623-001"; tissue "lv";
5	ncSplice	gene	81618685	81680963	.	-	.	gene_id "ENSRNOG00000051118"; gene_name "Rn50_5_0815.7"; gene_source "ncSplice"; gene_biotype "unprocessed_pseudogene";
5	ncSplice	transcript	81618685	81680963	.	-	.	gene_id "ENSRNOG00000051118"; transcript_id "rnCircRNA-104"; gene_name "Rn50_5_0815.7"; gene_biotype "unprocessed_pseudogene"; transcript_biotype "circRNA"; oId "lv:circRn50_5_0815.7-1624-001"; tissue "lv";
5	ncSplice	exon	81618685	81680963	.	-	.	gene_id "ENSRNOG00000051118"; transcript_id "rnCircRNA-104"; exon_number "1" gene_name "Rn50_5_0815.7"; gene_biotype "unprocessed_pseudogene"; oId "lv:circRn50_5_0815.7-1624-001"; tissue "lv";
5	ncSplice	gene	95177383	95177596	.	+	.	gene_id "5:95177382:95177596:1"; gene_name "5:95177382:95177596:1"; gene_source "ncSplice"; gene_biotype "novel";
5	ncSplice	transcript	95177383	95177596	.	+	.	gene_id "5:95177382:95177596:1"; transcript_id "rnCircRNA-105"; gene_name "5:95177382:95177596:1"; gene_biotype "novel"; transcript_biotype "circRNA"; oId "lv:circ5:95177382:95177596:1-1627-001"; tissue "lv";
5	ncSplice	exon	95177383	95177596	.	+	.	gene_id "5:95177382:95177596:1"; transcript_id "rnCircRNA-105"; exon_number "1" gene_name "5:95177382:95177596:1"; gene_biotype "novel"; oId "lv:circ5:95177382:95177596:1-1627-001"; tissue "lv";
6	ncSplice	gene	100915831	100915964	.	+	.	gene_id "ENSRNOG00000050540"; gene_name "LOC102723236"; gene_source "ncSplice"; gene_biotype "miRNA";
6	ncSplice	transcript	100915831	100915964	.	+	.	gene_id "ENSRNOG00000050540"; transcript_id "rnCircRNA-106"; gene_name "LOC102723236"; gene_biotype "miRNA"; transcript_biotype "circRNA"; oId "lv:circLOC102723236-1631-001"; tissue "lv";
6	ncSplice	exon	100915831	100915964	.	+	.	gene_id "ENSRNOG00000050540"; transcript_id "rnCircRNA-106"; exon_number "1" gene_name "LOC102723236"; gene_biotype "miRNA"; oId "lv:circLOC102723236-1631-001"; tissue "lv";
6	ncSplice	gene	1603669	1604584	.	-	.	gene_id "ENSRNOG00000005289"; gene_name "Prkd3"; gene_source "ncSplice"; gene_biotype "protein_coding";
6	ncSplice	transcript	1603669	1604584	.	-	.	gene_id "ENSRNOG00000005289"; transcript_id "rnCircRNA-107"; gene_name "Prkd3"; gene_biotype "protein_coding"; transcript_biotype "circRNA"; oId "lv:circPrkd3-1649-001|ts:circPrkd3-10270-001"; tissue "lv|ts";
6	ncSplice	exon	1603669	1604584	.	-	.	gene_id "ENSRNOG00000005289"; transcript_id "rnCircRNA-107"; exon_number "1" gene_name "Prkd3"; gene_biotype "protein_coding"; oId "lv:circPrkd3-1649-001|ts:circPrkd3-10270-001"; tissue "lv|ts";
6	ncSplice	gene	22145300	22145850	.	+	.	gene_id "ENSRNOG00000040110"; gene_name "Foxn2"; gene_source "ncSplice"; gene_biotype "protein_coding";
6	ncSplice	transcript	22145300	22145850	.	+	.	gene_id "ENSRNOG00000040110"; transcript_id "rnCircRNA-108"; gene_name "Foxn2"; gene_biotype "protein_coding"; transcript_biotype "circRNA"; oId "lv:circFoxn2-1650-001|ce:circFoxn2-6322-001|ts:circFoxn2-10271-001"; tissue "lv|ce|ts";
6	ncSplice	exon	22145300	22145850	.	+	.	gene_id "ENSRNOG00000040110"; transcript_id "rnCircRNA-108"; exon_number "1" gene_name "Foxn2"; gene_biotype "protein_coding"; oId "lv:circFoxn2-1650-001|ce:circFoxn2-6322-001|ts:circFoxn2-10271-001"; tissue "lv|ce|ts";
6	ncSplice	gene	39269686	39270556	.	-	.	gene_id "6:39269685:39270556:-1"; gene_name "6:39269685:39270556:-1"; gene_source "ncSplice"; gene_biotype "novel";
6	ncSplice	transcript	39269686	39270556	.	-	.	gene_id "6:39269685:39270556:-1"; transcript_id "rnCircRNA-109"; gene_name "6:39269685:39270556:-1"; gene_biotype "novel"; transcript_biotype "circRNA"; oId "lv:circ6:39269685:39270556:-1-1660-001"; tissue "lv";
6	ncSplice	exon	39269686	39270556	.	-	.	gene_id "6:39269685:39270556:-1"; transcript_id "rnCircRNA-109"; exon_number "1" gene_name "6:39269685:39270556:-1"; gene_biotype "novel"; oId "lv:circ6:39269685:39270556:-1-1660-001"; tissue "lv";
6	ncSplice	gene	39270557	39270765	.	-	.	gene_id "6:39270556:39270765:-1"; gene_name "6:39270556:39270765:-1"; gene_source "ncSplice"; gene_biotype "novel";
6	ncSplice	transcript	39270557	39270765	.	-	.	gene_id "6:39270556:39270765:-1"; transcript_id "rnCircRNA-110"; gene_name "6:39270556:39270765:-1"; gene_biotype "novel"; transcript_biotype "circRNA"; oId "lv:circ6:39270556:39270765:-1-1662-001|ce:circ6:39270556:39270765:-1-6342-001|ts:circ6:39270556:39270765:-1-10280-001"; tissue "lv|ce|ts";
6	ncSplice	exon	39270557	39270765	.	-	.	gene_id "6:39270556:39270765:-1"; transcript_id "rnCircRNA-110"; exon_number "1" gene_name "6:39270556:39270765:-1"; gene_biotype "novel"; oId "lv:circ6:39270556:39270765:-1-1662-001|ce:circ6:39270556:39270765:-1-6342-001|ts:circ6:39270556:39270765:-1-10280-001"; tissue "lv|ce|ts";
6	ncSplice	gene	68895024	68895292	.	-	.	gene_id "ENSRNOG00000004239"; gene_name "LOC100362999"; gene_source "ncSplice"; gene_biotype "pseudogene";
6	ncSplice	transcript	68895024	68895292	.	-	.	gene_id "ENSRNOG00000004239"; transcript_id "rnCircRNA-111"; gene_name "LOC100362999"; gene_biotype "pseudogene"; transcript_biotype "circRNA"; oId "lv:circLOC100362999-1669-001|ce:circLOC100362999-6350-001|ts:circLOC100362999-10293-001"; tissue "lv|ce|ts";
6	ncSplice	exon	68895024	68895292	.	-	.	gene_id "ENSRNOG00000004239"; transcript_id "rnCircRNA-111"; exon_number "1" gene_name "LOC100362999"; gene_biotype "pseudogene"; oId "lv:circLOC100362999-1669-001|ce:circLOC100362999-6350-001|ts:circLOC100362999-10293-001"; tissue "lv|ce|ts";
8	ncSplice	gene	41683654	41685515	.	+	.	gene_id "8:41683653:41685515:1"; gene_name "8:41683653:41685515:1"; gene_source "ncSplice"; gene_biotype "novel";
8	ncSplice	transcript	41683654	41685515	.	+	.	gene_id "8:41683653:41685515:1"; transcript_id "rnCircRNA-112"; gene_name "8:41683653:41685515:1"; gene_biotype "novel"; transcript_biotype "circRNA"; oId "lv:circ8:41683653:41685515:1-1741-001"; tissue "lv";
8	ncSplice	exon	41683654	41685515	.	+	.	gene_id "8:41683653:41685515:1"; transcript_id "rnCircRNA-112"; exon_number "1" gene_name "8:41683653:41685515:1"; gene_biotype "novel"; oId "lv:circ8:41683653:41685515:1-1741-001"; tissue "lv";
8	ncSplice	gene	71015659	71016529	.	-	.	gene_id "ENSRNOG00000015977"; gene_name "Zfp609"; gene_source "ncSplice"; gene_biotype "protein_coding";
8	ncSplice	transcript	71015659	71016529	.	-	.	gene_id "ENSRNOG00000015977"; transcript_id "rnCircRNA-113"; gene_name "Zfp609"; gene_biotype "protein_coding"; transcript_biotype "circRNA"; oId "lv:circZfp609-1751-001|ce:circZfp609-6551-001|ts:circZfp609-10450-001"; tissue "lv|ce|ts";
8	ncSplice	exon	71015659	71016529	.	-	.	gene_id "ENSRNOG00000015977"; transcript_id "rnCircRNA-113"; exon_number "1" gene_name "Zfp609"; gene_biotype "protein_coding"; oId "lv:circZfp609-1751-001|ce:circZfp609-6551-001|ts:circZfp609-10450-001"; tissue "lv|ce|ts";
9	ncSplice	gene	98940897	98941135	.	-	.	gene_id "ENSRNOG00000020372"; gene_name "Hdac4"; gene_source "ncSplice"; gene_biotype "protein_coding";
9	ncSplice	transcript	98940897	98941135	.	-	.	gene_id "ENSRNOG00000020372"; transcript_id "rnCircRNA-114"; gene_name "Hdac4"; gene_biotype "protein_coding"; transcript_biotype "circRNA"; oId "lv:circHdac4-1767-001|ce:circHdac4-6637-001|ts:circHdac4-10546-001"; tissue "lv|ce|ts";
9	ncSplice	exon	98940897	98941135	.	-	.	gene_id "ENSRNOG00000020372"; transcript_id "rnCircRNA-114"; exon_number "1" gene_name "Hdac4"; gene_biotype "protein_coding"; oId "lv:circHdac4-1767-001|ce:circHdac4-6637-001|ts:circHdac4-10546-001"; tissue "lv|ce|ts";
10	ncSplice	gene	10381521	10405559	.	+	.	gene_id "ENSRNOG00000005330"; gene_name "Crebbp"; gene_source "ncSplice"; gene_biotype "protein_coding";
10	ncSplice	transcript	10381521	10405559	.	+	.	gene_id "ENSRNOG00000005330"; transcript_id "rnCircRNA-115"; gene_name "Crebbp"; gene_biotype "protein_coding"; transcript_biotype "circRNA"; oId "ce:circCrebbp-1-001"; tissue "ce";
10	ncSplice	exon	10381521	10382230	.	+	.	gene_id "ENSRNOG00000005330"; transcript_id "rnCircRNA-115"; exon_number "1" gene_name "Crebbp"; gene_biotype "protein_coding"; oId "ce:circCrebbp-1-001"; tissue "ce";
10	ncSplice	exon	10405383	10405559	.	+	.	gene_id "ENSRNOG00000005330"; transcript_id "rnCircRNA-115"; exon_number "2" gene_name "Crebbp"; gene_biotype "protein_coding"; oId "ce:circCrebbp-1-001"; tissue "ce";
10	ncSplice	gene	109168465	109182126	.	-	.	gene_id "ENSRNOG00000036698"; gene_name "Nploc4"; gene_source "ncSplice"; gene_biotype "protein_coding";
10	ncSplice	transcript	109168465	109182126	.	-	.	gene_id "ENSRNOG00000036698"; transcript_id "rnCircRNA-116"; gene_name "Nploc4"; gene_biotype "protein_coding"; transcript_biotype "circRNA"; oId "ce:circNploc4-16-001"; tissue "ce";
10	ncSplice	exon	109168465	109168625	.	-	.	gene_id "ENSRNOG00000036698"; transcript_id "rnCircRNA-116"; exon_number "1" gene_name "Nploc4"; gene_biotype "protein_coding"; oId "ce:circNploc4-16-001"; tissue "ce";
10	ncSplice	exon	109173965	109174091	.	-	.	gene_id "ENSRNOG00000036698"; transcript_id "rnCircRNA-116"; exon_number "2" gene_name "Nploc4"; gene_biotype "protein_coding"; oId "ce:circNploc4-16-001"; tissue "ce";
10	ncSplice	exon	109174836	109174907	.	-	.	gene_id "ENSRNOG00000036698"; transcript_id "rnCircRNA-116"; exon_number "3" gene_name "Nploc4"; gene_biotype "protein_coding"; oId "ce:circNploc4-16-001"; tissue "ce";
10	ncSplice	exon	109176859	109176945	.	-	.	gene_id "ENSRNOG00000036698"; transcript_id "rnCircRNA-116"; exon_number "4" gene_name "Nploc4"; gene_biotype "protein_coding"; oId "ce:circNploc4-16-001"; tissue "ce";
10	ncSplice	exon	109179578	109179757	.	-	.	gene_id "ENSRNOG00000036698"; transcript_id "rnCircRNA-116"; exon_number "5" gene_name "Nploc4"; gene_biotype "protein_coding"; oId "ce:circNploc4-16-001"; tissue "ce";
10	ncSplice	exon	109180113	109180236	.	-	.	gene_id "ENSRNOG00000036698"; transcript_id "rnCircRNA-116"; exon_number "6" gene_name "Nploc4"; gene_biotype "protein_coding"; oId "ce:circNploc4-16-001"; tissue "ce";
10	ncSplice	exon	109182032	109182126	.	-	.	gene_id "ENSRNOG00000036698"; transcript_id "rnCircRNA-116"; exon_number "7" gene_name "Nploc4"; gene_biotype "protein_coding"; oId "ce:circNploc4-16-001"; tissue "ce";
10	ncSplice	gene	13748221	13752469	.	+	.	gene_id "ENSRNOG00000010771"; gene_name "Pkd1"; gene_source "ncSplice"; gene_biotype "protein_coding";
10	ncSplice	transcript	13748221	13752469	.	+	.	gene_id "ENSRNOG00000010771"; transcript_id "rnCircRNA-117"; gene_name "Pkd1"; gene_biotype "protein_coding"; transcript_biotype "circRNA"; oId "ce:circPkd1-38-001"; tissue "ce";
10	ncSplice	exon	13748221	13748292	.	+	.	gene_id "ENSRNOG00000010771"; transcript_id "rnCircRNA-117"; exon_number "1" gene_name "Pkd1"; gene_biotype "protein_coding"; oId "ce:circPkd1-38-001"; tissue "ce";
10	ncSplice	exon	13748407	13748478	.	+	.	gene_id "ENSRNOG00000010771"; transcript_id "rnCircRNA-117"; exon_number "2" gene_name "Pkd1"; gene_biotype "protein_coding"; oId "ce:circPkd1-38-001"; tissue "ce";
10	ncSplice	exon	13748650	13748819	.	+	.	gene_id "ENSRNOG00000010771"; transcript_id "rnCircRNA-117"; exon_number "3" gene_name "Pkd1"; gene_biotype "protein_coding"; oId "ce:circPkd1-38-001"; tissue "ce";
10	ncSplice	exon	13749082	13749753	.	+	.	gene_id "ENSRNOG00000010771"; transcript_id "rnCircRNA-117"; exon_number "4" gene_name "Pkd1"; gene_biotype "protein_coding"; oId "ce:circPkd1-38-001"; tissue "ce";
10	ncSplice	exon	13749868	13750051	.	+	.	gene_id "ENSRNOG00000010771"; transcript_id "rnCircRNA-117"; exon_number "5" gene_name "Pkd1"; gene_biotype "protein_coding"; oId "ce:circPkd1-38-001"; tissue "ce";
10	ncSplice	exon	13751098	13751315	.	+	.	gene_id "ENSRNOG00000010771"; transcript_id "rnCircRNA-117"; exon_number "6" gene_name "Pkd1"; gene_biotype "protein_coding"; oId "ce:circPkd1-38-001"; tissue "ce";
10	ncSplice	exon	13751575	13751690	.	+	.	gene_id "ENSRNOG00000010771"; transcript_id "rnCircRNA-117"; exon_number "7" gene_name "Pkd1"; gene_biotype "protein_coding"; oId "ce:circPkd1-38-001"; tissue "ce";
10	ncSplice	exon	13752343	13752469	.	+	.	gene_id "ENSRNOG00000010771"; transcript_id "rnCircRNA-117"; exon_number "8" gene_name "Pkd1"; gene_biotype "protein_coding"; oId "ce:circPkd1-38-001"; tissue "ce";
10	ncSplice	gene	16598394	16622160	.	-	.	gene_id "ENSRNOG00000020769"; gene_name "Crebrf"; gene_source "ncSplice"; gene_biotype "protein_coding";
10	ncSplice	transcript	16598394	16622160	.	-	.	gene_id "ENSRNOG00000020769"; transcript_id "rnCircRNA-118"; gene_name "Crebrf"; gene_biotype "protein_coding"; transcript_biotype "circRNA"; oId "ce:circCrebrf-46-001"; tissue "ce";
10	ncSplice	exon	16598394	16598516	.	-	.	gene_id "ENSRNOG00000020769"; transcript_id "rnCircRNA-118"; exon_number "1" gene_name "Crebrf"; gene_biotype "protein_coding"; oId "ce:circCrebrf-46-001"; tissue "ce";
10	ncSplice	exon	16599599	16599672	.	-	.	gene_id "ENSRNOG00000020769"; transcript_id "rnCircRNA-118"; exon_number "2" gene_name "Crebrf"; gene_biotype "protein_coding"; oId "ce:circCrebrf-46-001"; tissue "ce";
10	ncSplice	exon	16602006	16602195	.	-	.	gene_id "ENSRNOG00000020769"; transcript_id "rnCircRNA-118"; exon_number "3" gene_name "Crebrf"; gene_biotype "protein_coding"; oId "ce:circCrebrf-46-001"; tissue "ce";
10	ncSplice	exon	16603889	16604083	.	-	.	gene_id "ENSRNOG00000020769"; transcript_id "rnCircRNA-118"; exon_number "4" gene_name "Crebrf"; gene_biotype "protein_coding"; oId "ce:circCrebrf-46-001"; tissue "ce";
10	ncSplice	exon	16616082	16617171	.	-	.	gene_id "ENSRNOG00000020769"; transcript_id "rnCircRNA-118"; exon_number "5" gene_name "Crebrf"; gene_biotype "protein_coding"; oId "ce:circCrebrf-46-001"; tissue "ce";
10	ncSplice	exon	16619756	16619881	.	-	.	gene_id "ENSRNOG00000020769"; transcript_id "rnCircRNA-118"; exon_number "6" gene_name "Crebrf"; gene_biotype "protein_coding"; oId "ce:circCrebrf-46-001"; tissue "ce";
10	ncSplice	exon	16621966	16622160	.	-	.	gene_id "ENSRNOG00000020769"; transcript_id "rnCircRNA-118"; exon_number "7" gene_name "Crebrf"; gene_biotype "protein_coding"; oId "ce:circCrebrf-46-001"; tissue "ce";
10	ncSplice	gene	16616082	16619881	.	-	.	gene_id "ENSRNOG00000020769"; gene_name "Crebrf"; gene_source "ncSplice"; gene_biotype "protein_coding";
10	ncSplice	transcript	16616082	16619881	.	-	.	gene_id "ENSRNOG00000020769"; transcript_id "rnCircRNA-119"; gene_name "Crebrf"; gene_biotype "protein_coding"; transcript_biotype "circRNA"; oId "ce:circCrebrf-47-001"; tissue "ce";
10	ncSplice	exon	16616082	16617171	.	-	.	gene_id "ENSRNOG00000020769"; transcript_id "rnCircRNA-119"; exon_number "1" gene_name "Crebrf"; gene_biotype "protein_coding"; oId "ce:circCrebrf-47-001"; tissue "ce";
10	ncSplice	exon	16619756	16619881	.	-	.	gene_id "ENSRNOG00000020769"; transcript_id "rnCircRNA-119"; exon_number "2" gene_name "Crebrf"; gene_biotype "protein_coding"; oId "ce:circCrebrf-47-001"; tissue "ce";
10	ncSplice	gene	16616082	16622160	.	-	.	gene_id "ENSRNOG00000020769"; gene_name "Crebrf"; gene_source "ncSplice"; gene_biotype "protein_coding";
10	ncSplice	transcript	16616082	16622160	.	-	.	gene_id "ENSRNOG00000020769"; transcript_id "rnCircRNA-120"; gene_name "Crebrf"; gene_biotype "protein_coding"; transcript_biotype "circRNA"; oId "ce:circCrebrf-49-001"; tissue "ce";
10	ncSplice	exon	16616082	16617171	.	-	.	gene_id "ENSRNOG00000020769"; transcript_id "rnCircRNA-120"; exon_number "1" gene_name "Crebrf"; gene_biotype "protein_coding"; oId "ce:circCrebrf-49-001"; tissue "ce";
10	ncSplice	exon	16619756	16619881	.	-	.	gene_id "ENSRNOG00000020769"; transcript_id "rnCircRNA-120"; exon_number "2" gene_name "Crebrf"; gene_biotype "protein_coding"; oId "ce:circCrebrf-49-001"; tissue "ce";
10	ncSplice	exon	16621966	16622160	.	-	.	gene_id "ENSRNOG00000020769"; transcript_id "rnCircRNA-120"; exon_number "3" gene_name "Crebrf"; gene_biotype "protein_coding"; oId "ce:circCrebrf-49-001"; tissue "ce";
10	ncSplice	gene	35647472	35647856	.	+	.	gene_id "ENSRNOG00000003399"; gene_name "Hnrnph1"; gene_source "ncSplice"; gene_biotype "protein_coding";
10	ncSplice	transcript	35647472	35647856	.	+	.	gene_id "ENSRNOG00000003399"; transcript_id "rnCircRNA-121"; gene_name "Hnrnph1"; gene_biotype "protein_coding"; transcript_biotype "circRNA"; oId "ce:circHnrnph1-83-001|ts:circHnrnph1-139-001"; tissue "ce|ts";
10	ncSplice	exon	35647472	35647605	.	+	.	gene_id "ENSRNOG00000003399"; transcript_id "rnCircRNA-121"; exon_number "1" gene_name "Hnrnph1"; gene_biotype "protein_coding"; oId "ce:circHnrnph1-83-001|ts:circHnrnph1-139-001"; tissue "ce|ts";
10	ncSplice	exon	35647721	35647856	.	+	.	gene_id "ENSRNOG00000003399"; transcript_id "rnCircRNA-121"; exon_number "2" gene_name "Hnrnph1"; gene_biotype "protein_coding"; oId "ce:circHnrnph1-83-001|ts:circHnrnph1-139-001"; tissue "ce|ts";
10	ncSplice	gene	35647493	35647856	.	+	.	gene_id "ENSRNOG00000003399"; gene_name "Hnrnph1"; gene_source "ncSplice"; gene_biotype "protein_coding";
10	ncSplice	transcript	35647493	35647856	.	+	.	gene_id "ENSRNOG00000003399"; transcript_id "rnCircRNA-122"; gene_name "Hnrnph1"; gene_biotype "protein_coding"; transcript_biotype "circRNA"; oId "ce:circHnrnph1-84-001|ts:circHnrnph1-140-001"; tissue "ce|ts";
10	ncSplice	exon	35647493	35647605	.	+	.	gene_id "ENSRNOG00000003399"; transcript_id "rnCircRNA-122"; exon_number "1" gene_name "Hnrnph1"; gene_biotype "protein_coding"; oId "ce:circHnrnph1-84-001|ts:circHnrnph1-140-001"; tissue "ce|ts";
10	ncSplice	exon	35647721	35647856	.	+	.	gene_id "ENSRNOG00000003399"; transcript_id "rnCircRNA-122"; exon_number "2" gene_name "Hnrnph1"; gene_biotype "protein_coding"; oId "ce:circHnrnph1-84-001|ts:circHnrnph1-140-001"; tissue "ce|ts";
10	ncSplice	gene	35669471	35672530	.	-	.	gene_id "ENSRNOG00000003536"; gene_name "Rufy1"; gene_source "ncSplice"; gene_biotype "protein_coding";
10	ncSplice	transcript	35669471	35672530	.	-	.	gene_id "ENSRNOG00000003536"; transcript_id "rnCircRNA-123"; gene_name "Rufy1"; gene_biotype "protein_coding"; transcript_biotype "circRNA"; oId "ce:circRufy1-85-001"; tissue "ce";
10	ncSplice	exon	35669471	35669638	.	-	.	gene_id "ENSRNOG00000003536"; transcript_id "rnCircRNA-123"; exon_number "1" gene_name "Rufy1"; gene_biotype "protein_coding"; oId "ce:circRufy1-85-001"; tissue "ce";
10	ncSplice	exon	35670971	35671087	.	-	.	gene_id "ENSRNOG00000003536"; transcript_id "rnCircRNA-123"; exon_number "2" gene_name "Rufy1"; gene_biotype "protein_coding"; oId "ce:circRufy1-85-001"; tissue "ce";
10	ncSplice	exon	35672429	35672530	.	-	.	gene_id "ENSRNOG00000003536"; transcript_id "rnCircRNA-123"; exon_number "3" gene_name "Rufy1"; gene_biotype "protein_coding"; oId "ce:circRufy1-85-001"; tissue "ce";
10	ncSplice	gene	38494693	38501933	.	+	.	gene_id "ENSRNOG00000006965"; gene_name "Aff4"; gene_source "ncSplice"; gene_biotype "protein_coding";
10	ncSplice	transcript	38494693	38501933	.	+	.	gene_id "ENSRNOG00000006965"; transcript_id "rnCircRNA-124"; gene_name "Aff4"; gene_biotype "protein_coding"; transcript_biotype "circRNA"; oId "ce:circAff4-92-001"; tissue "ce";
10	ncSplice	exon	38494693	38494819	.	+	.	gene_id "ENSRNOG00000006965"; transcript_id "rnCircRNA-124"; exon_number "1" gene_name "Aff4"; gene_biotype "protein_coding"; oId "ce:circAff4-92-001"; tissue "ce";
10	ncSplice	exon	38498541	38499320	.	+	.	gene_id "ENSRNOG00000006965"; transcript_id "rnCircRNA-124"; exon_number "2" gene_name "Aff4"; gene_biotype "protein_coding"; oId "ce:circAff4-92-001"; tissue "ce";
10	ncSplice	exon	38501889	38501933	.	+	.	gene_id "ENSRNOG00000006965"; transcript_id "rnCircRNA-124"; exon_number "3" gene_name "Aff4"; gene_biotype "protein_coding"; oId "ce:circAff4-92-001"; tissue "ce";
10	ncSplice	gene	38671193	38676381	.	+	.	gene_id "ENSRNOG00000007462"; gene_name "Sept8"; gene_source "ncSplice"; gene_biotype "protein_coding";
10	ncSplice	transcript	38671193	38676381	.	+	.	gene_id "ENSRNOG00000007462"; transcript_id "rnCircRNA-125"; gene_name "Sept8"; gene_biotype "protein_coding"; transcript_biotype "circRNA"; oId "ce:circSept8-95-001"; tissue "ce";
10	ncSplice	exon	38671193	38671313	.	+	.	gene_id "ENSRNOG00000007462"; transcript_id "rnCircRNA-125"; exon_number "1" gene_name "Sept8"; gene_biotype "protein_coding"; oId "ce:circSept8-95-001"; tissue "ce";
10	ncSplice	exon	38672895	38673599	.	+	.	gene_id "ENSRNOG00000007462"; transcript_id "rnCircRNA-125"; exon_number "2" gene_name "Sept8"; gene_biotype "protein_coding"; oId "ce:circSept8-95-001"; tissue "ce";
10	ncSplice	exon	38674430	38676381	.	+	.	gene_id "ENSRNOG00000007462"; transcript_id "rnCircRNA-125"; exon_number "3" gene_name "Sept8"; gene_biotype "protein_coding"; oId "ce:circSept8-95-001"; tissue "ce";
10	ncSplice	gene	40473874	40480871	.	-	.	gene_id "ENSRNOG00000012575"; gene_name "Fat2"; gene_source "ncSplice"; gene_biotype "protein_coding";
10	ncSplice	transcript	40473874	40480871	.	-	.	gene_id "ENSRNOG00000012575"; transcript_id "rnCircRNA-126"; gene_name "Fat2"; gene_biotype "protein_coding"; transcript_biotype "circRNA"; oId "ce:circFat2-107-001"; tissue "ce";
10	ncSplice	exon	40473874	40479835	.	-	.	gene_id "ENSRNOG00000012575"; transcript_id "rnCircRNA-126"; exon_number "1" gene_name "Fat2"; gene_biotype "protein_coding"; oId "ce:circFat2-107-001"; tissue "ce";
10	ncSplice	exon	40480539	40480871	.	-	.	gene_id "ENSRNOG00000012575"; transcript_id "rnCircRNA-126"; exon_number "2" gene_name "Fat2"; gene_biotype "protein_coding"; oId "ce:circFat2-107-001"; tissue "ce";
10	ncSplice	gene	57379235	57379800	.	-	.	gene_id "ENSRNOG00000007054"; gene_name "Dhx33"; gene_source "ncSplice"; gene_biotype "protein_coding";
10	ncSplice	transcript	57379235	57379800	.	-	.	gene_id "ENSRNOG00000007054"; transcript_id "rnCircRNA-127"; gene_name "Dhx33"; gene_biotype "protein_coding"; transcript_biotype "circRNA"; oId "ce:circDhx33-146-001|ts:circDhx33-248-001"; tissue "ce|ts";
10	ncSplice	exon	57379235	57379405	.	-	.	gene_id "ENSRNOG00000007054"; transcript_id "rnCircRNA-127"; exon_number "1" gene_name "Dhx33"; gene_biotype "protein_coding"; oId "ce:circDhx33-146-001|ts:circDhx33-248-001"; tissue "ce|ts";
10	ncSplice	exon	57379573	57379800	.	-	.	gene_id "ENSRNOG00000007054"; transcript_id "rnCircRNA-127"; exon_number "2" gene_name "Dhx33"; gene_biotype "protein_coding"; oId "ce:circDhx33-146-001|ts:circDhx33-248-001"; tissue "ce|ts";
10	ncSplice	gene	59032137	59036607	.	+	.	gene_id "ENSRNOG00000016212"; gene_name "Ankfy1"; gene_source "ncSplice"; gene_biotype "protein_coding";
10	ncSplice	transcript	59032137	59036607	.	+	.	gene_id "ENSRNOG00000016212"; transcript_id "rnCircRNA-128"; gene_name "Ankfy1"; gene_biotype "protein_coding"; transcript_biotype "circRNA"; oId "ce:circAnkfy1-150-001|ts:circAnkfy1-252-003"; tissue "ce|ts";
10	ncSplice	exon	59032137	59032260	.	+	.	gene_id "ENSRNOG00000016212"; transcript_id "rnCircRNA-128"; exon_number "1" gene_name "Ankfy1"; gene_biotype "protein_coding"; oId "ce:circAnkfy1-150-001|ts:circAnkfy1-252-003"; tissue "ce|ts";
10	ncSplice	exon	59034587	59034736	.	+	.	gene_id "ENSRNOG00000016212"; transcript_id "rnCircRNA-128"; exon_number "2" gene_name "Ankfy1"; gene_biotype "protein_coding"; oId "ce:circAnkfy1-150-001|ts:circAnkfy1-252-003"; tissue "ce|ts";
10	ncSplice	exon	59036442	59036607	.	+	.	gene_id "ENSRNOG00000016212"; transcript_id "rnCircRNA-128"; exon_number "3" gene_name "Ankfy1"; gene_biotype "protein_coding"; oId "ce:circAnkfy1-150-001|ts:circAnkfy1-252-003"; tissue "ce|ts";
10	ncSplice	gene	62271526	62284741	.	+	.	gene_id "ENSRNOG00000015692"; gene_name "Taok1"; gene_source "ncSplice"; gene_biotype "protein_coding";
10	ncSplice	transcript	62271526	62284741	.	+	.	gene_id "ENSRNOG00000015692"; transcript_id "rnCircRNA-129"; gene_name "Taok1"; gene_biotype "protein_coding"; transcript_biotype "circRNA"; oId "ce:circTaok1-165-001|ts:circTaok1-276-001"; tissue "ce|ts";
10	ncSplice	exon	62271526	62271747	.	+	.	gene_id "ENSRNOG00000015692"; transcript_id "rnCircRNA-129"; exon_number "1" gene_name "Taok1"; gene_biotype "protein_coding"; oId "ce:circTaok1-165-001|ts:circTaok1-276-001"; tissue "ce|ts";
10	ncSplice	exon	62275412	62275483	.	+	.	gene_id "ENSRNOG00000015692"; transcript_id "rnCircRNA-129"; exon_number "2" gene_name "Taok1"; gene_biotype "protein_coding"; oId "ce:circTaok1-165-001|ts:circTaok1-276-001"; tissue "ce|ts";
10	ncSplice	exon	62279392	62279493	.	+	.	gene_id "ENSRNOG00000015692"; transcript_id "rnCircRNA-129"; exon_number "3" gene_name "Taok1"; gene_biotype "protein_coding"; oId "ce:circTaok1-165-001|ts:circTaok1-276-001"; tissue "ce|ts";
10	ncSplice	exon	62280324	62280978	.	+	.	gene_id "ENSRNOG00000015692"; transcript_id "rnCircRNA-129"; exon_number "4" gene_name "Taok1"; gene_biotype "protein_coding"; oId "ce:circTaok1-165-001|ts:circTaok1-276-001"; tissue "ce|ts";
10	ncSplice	exon	62281174	62281204	.	+	.	gene_id "ENSRNOG00000015692"; transcript_id "rnCircRNA-129"; exon_number "5" gene_name "Taok1"; gene_biotype "protein_coding"; oId "ce:circTaok1-165-001|ts:circTaok1-276-001"; tissue "ce|ts";
10	ncSplice	exon	62283055	62283168	.	+	.	gene_id "ENSRNOG00000015692"; transcript_id "rnCircRNA-129"; exon_number "6" gene_name "Taok1"; gene_biotype "protein_coding"; oId "ce:circTaok1-165-001|ts:circTaok1-276-001"; tissue "ce|ts";
10	ncSplice	exon	62284650	62284741	.	+	.	gene_id "ENSRNOG00000015692"; transcript_id "rnCircRNA-129"; exon_number "7" gene_name "Taok1"; gene_biotype "protein_coding"; oId "ce:circTaok1-165-001|ts:circTaok1-276-001"; tissue "ce|ts";
10	ncSplice	gene	64749902	64750967	.	-	.	gene_id "ENSRNOG00000013780"; gene_name "Nf1"; gene_source "ncSplice"; gene_biotype "protein_coding";
10	ncSplice	transcript	64749902	64750967	.	-	.	gene_id "ENSRNOG00000013780"; transcript_id "rnCircRNA-130"; gene_name "Nf1"; gene_biotype "protein_coding"; transcript_biotype "circRNA"; oId "ce:circNf1-175-001|ts:circNf1-294-001"; tissue "ce|ts";
10	ncSplice	exon	64749902	64750042	.	-	.	gene_id "ENSRNOG00000013780"; transcript_id "rnCircRNA-130"; exon_number "1" gene_name "Nf1"; gene_biotype "protein_coding"; oId "ce:circNf1-175-001|ts:circNf1-294-001"; tissue "ce|ts";
10	ncSplice	exon	64750774	64750967	.	-	.	gene_id "ENSRNOG00000013780"; transcript_id "rnCircRNA-130"; exon_number "2" gene_name "Nf1"; gene_biotype "protein_coding"; oId "ce:circNf1-175-001|ts:circNf1-294-001"; tissue "ce|ts";
10	ncSplice	gene	65835360	65835845	.	-	.	gene_id "ENSRNOG00000008891"; gene_name "Ift20"; gene_source "ncSplice"; gene_biotype "protein_coding";
10	ncSplice	transcript	65835360	65835845	.	-	.	gene_id "ENSRNOG00000008891"; transcript_id "rnCircRNA-131"; gene_name "Ift20"; gene_biotype "protein_coding"; transcript_biotype "circRNA"; oId "ce:circIft20-179-001"; tissue "ce";
10	ncSplice	exon	65835360	65835488	.	-	.	gene_id "ENSRNOG00000008891"; transcript_id "rnCircRNA-131"; exon_number "1" gene_name "Ift20"; gene_biotype "protein_coding"; oId "ce:circIft20-179-001"; tissue "ce";
10	ncSplice	exon	65835614	65835845	.	-	.	gene_id "ENSRNOG00000008891"; transcript_id "rnCircRNA-131"; exon_number "2" gene_name "Ift20"; gene_biotype "protein_coding"; oId "ce:circIft20-179-001"; tissue "ce";
10	ncSplice	gene	70908753	70918106	.	+	.	gene_id "ENSRNOG00000000242"; gene_name "Synrg"; gene_source "ncSplice"; gene_biotype "protein_coding";
10	ncSplice	transcript	70908753	70918106	.	+	.	gene_id "ENSRNOG00000000242"; transcript_id "rnCircRNA-132"; gene_name "Synrg"; gene_biotype "protein_coding"; transcript_biotype "circRNA"; oId "ce:circSynrg-196-002"; tissue "ce";
10	ncSplice	exon	70908753	70908858	.	+	.	gene_id "ENSRNOG00000000242"; transcript_id "rnCircRNA-132"; exon_number "1" gene_name "Synrg"; gene_biotype "protein_coding"; oId "ce:circSynrg-196-002"; tissue "ce";
10	ncSplice	exon	70909531	70909642	.	+	.	gene_id "ENSRNOG00000000242"; transcript_id "rnCircRNA-132"; exon_number "2" gene_name "Synrg"; gene_biotype "protein_coding"; oId "ce:circSynrg-196-002"; tissue "ce";
10	ncSplice	exon	70915360	70915437	.	+	.	gene_id "ENSRNOG00000000242"; transcript_id "rnCircRNA-132"; exon_number "3" gene_name "Synrg"; gene_biotype "protein_coding"; oId "ce:circSynrg-196-002"; tissue "ce";
10	ncSplice	exon	70917907	70918106	.	+	.	gene_id "ENSRNOG00000000242"; transcript_id "rnCircRNA-132"; exon_number "4" gene_name "Synrg"; gene_biotype "protein_coding"; oId "ce:circSynrg-196-002"; tissue "ce";
10	ncSplice	gene	71428193	71432108	.	+	.	gene_id "10:71428192:71432108:1"; gene_name "10:71428192:71432108:1"; gene_source "ncSplice"; gene_biotype "novel";
10	ncSplice	transcript	71428193	71432108	.	+	.	gene_id "10:71428192:71432108:1"; transcript_id "rnCircRNA-133"; gene_name "10:71428192:71432108:1"; gene_biotype "novel"; transcript_biotype "circRNA"; oId "ce:circ10:71428192:71432108:1-200-001|ts:circ10:71428192:71432108:1-348-002"; tissue "ce|ts";
10	ncSplice	exon	71428193	71428239	.	+	.	gene_id "10:71428192:71432108:1"; transcript_id "rnCircRNA-133"; exon_number "1" gene_name "10:71428192:71432108:1"; gene_biotype "novel"; oId "ce:circ10:71428192:71432108:1-200-001|ts:circ10:71428192:71432108:1-348-002"; tissue "ce|ts";
10	ncSplice	exon	71431859	71432108	.	+	.	gene_id "10:71428192:71432108:1"; transcript_id "rnCircRNA-133"; exon_number "2" gene_name "10:71428192:71432108:1"; gene_biotype "novel"; oId "ce:circ10:71428192:71432108:1-200-001|ts:circ10:71428192:71432108:1-348-002"; tissue "ce|ts";
10	ncSplice	gene	72109950	72116821	.	+	.	gene_id "ENSRNOG00000002852"; gene_name "Myo19"; gene_source "ncSplice"; gene_biotype "protein_coding";
10	ncSplice	transcript	72109950	72116821	.	+	.	gene_id "ENSRNOG00000002852"; transcript_id "rnCircRNA-134"; gene_name "Myo19"; gene_biotype "protein_coding"; transcript_biotype "circRNA"; oId "ce:circMyo19-203-001"; tissue "ce";
10	ncSplice	exon	72109950	72110088	.	+	.	gene_id "ENSRNOG00000002852"; transcript_id "rnCircRNA-134"; exon_number "1" gene_name "Myo19"; gene_biotype "protein_coding"; oId "ce:circMyo19-203-001"; tissue "ce";
10	ncSplice	exon	72110406	72110554	.	+	.	gene_id "ENSRNOG00000002852"; transcript_id "rnCircRNA-134"; exon_number "2" gene_name "Myo19"; gene_biotype "protein_coding"; oId "ce:circMyo19-203-001"; tissue "ce";
10	ncSplice	exon	72112850	72112963	.	+	.	gene_id "ENSRNOG00000002852"; transcript_id "rnCircRNA-134"; exon_number "3" gene_name "Myo19"; gene_biotype "protein_coding"; oId "ce:circMyo19-203-001"; tissue "ce";
10	ncSplice	exon	72116689	72116821	.	+	.	gene_id "ENSRNOG00000002852"; transcript_id "rnCircRNA-134"; exon_number "4" gene_name "Myo19"; gene_biotype "protein_coding"; oId "ce:circMyo19-203-001"; tissue "ce";
10	ncSplice	gene	72109950	72119215	.	+	.	gene_id "ENSRNOG00000002852"; gene_name "Myo19"; gene_source "ncSplice"; gene_biotype "protein_coding";
10	ncSplice	transcript	72109950	72119215	.	+	.	gene_id "ENSRNOG00000002852"; transcript_id "rnCircRNA-135"; gene_name "Myo19"; gene_biotype "protein_coding"; transcript_biotype "circRNA"; oId "ce:circMyo19-205-001|ts:circMyo19-358-001"; tissue "ce|ts";
10	ncSplice	exon	72109950	72110088	.	+	.	gene_id "ENSRNOG00000002852"; transcript_id "rnCircRNA-135"; exon_number "1" gene_name "Myo19"; gene_biotype "protein_coding"; oId "ce:circMyo19-205-001|ts:circMyo19-358-001"; tissue "ce|ts";
10	ncSplice	exon	72110406	72110554	.	+	.	gene_id "ENSRNOG00000002852"; transcript_id "rnCircRNA-135"; exon_number "2" gene_name "Myo19"; gene_biotype "protein_coding"; oId "ce:circMyo19-205-001|ts:circMyo19-358-001"; tissue "ce|ts";
10	ncSplice	exon	72112850	72112963	.	+	.	gene_id "ENSRNOG00000002852"; transcript_id "rnCircRNA-135"; exon_number "3" gene_name "Myo19"; gene_biotype "protein_coding"; oId "ce:circMyo19-205-001|ts:circMyo19-358-001"; tissue "ce|ts";
10	ncSplice	exon	72116689	72116821	.	+	.	gene_id "ENSRNOG00000002852"; transcript_id "rnCircRNA-135"; exon_number "4" gene_name "Myo19"; gene_biotype "protein_coding"; oId "ce:circMyo19-205-001|ts:circMyo19-358-001"; tissue "ce|ts";
10	ncSplice	exon	72117941	72118010	.	+	.	gene_id "ENSRNOG00000002852"; transcript_id "rnCircRNA-135"; exon_number "5" gene_name "Myo19"; gene_biotype "protein_coding"; oId "ce:circMyo19-205-001|ts:circMyo19-358-001"; tissue "ce|ts";
10	ncSplice	exon	72118455	72118557	.	+	.	gene_id "ENSRNOG00000002852"; transcript_id "rnCircRNA-135"; exon_number "6" gene_name "Myo19"; gene_biotype "protein_coding"; oId "ce:circMyo19-205-001|ts:circMyo19-358-001"; tissue "ce|ts";
10	ncSplice	exon	72119119	72119215	.	+	.	gene_id "ENSRNOG00000002852"; transcript_id "rnCircRNA-135"; exon_number "7" gene_name "Myo19"; gene_biotype "protein_coding"; oId "ce:circMyo19-205-001|ts:circMyo19-358-001"; tissue "ce|ts";
10	ncSplice	gene	72828653	72842813	.	+	.	gene_id "ENSRNOG00000003329"; gene_name "Ppm1d"; gene_source "ncSplice"; gene_biotype "protein_coding";
10	ncSplice	transcript	72828653	72842813	.	+	.	gene_id "ENSRNOG00000003329"; transcript_id "rnCircRNA-136"; gene_name "Ppm1d"; gene_biotype "protein_coding"; transcript_biotype "circRNA"; oId "ce:circPpm1d-215-001"; tissue "ce";
10	ncSplice	exon	72828653	72828881	.	+	.	gene_id "ENSRNOG00000003329"; transcript_id "rnCircRNA-136"; exon_number "1" gene_name "Ppm1d"; gene_biotype "protein_coding"; oId "ce:circPpm1d-215-001"; tissue "ce";
10	ncSplice	exon	72835283	72835407	.	+	.	gene_id "ENSRNOG00000003329"; transcript_id "rnCircRNA-136"; exon_number "2" gene_name "Ppm1d"; gene_biotype "protein_coding"; oId "ce:circPpm1d-215-001"; tissue "ce";
10	ncSplice	exon	72839685	72839875	.	+	.	gene_id "ENSRNOG00000003329"; transcript_id "rnCircRNA-136"; exon_number "3" gene_name "Ppm1d"; gene_biotype "protein_coding"; oId "ce:circPpm1d-215-001"; tissue "ce";
10	ncSplice	exon	72842571	72842813	.	+	.	gene_id "ENSRNOG00000003329"; transcript_id "rnCircRNA-136"; exon_number "4" gene_name "Ppm1d"; gene_biotype "protein_coding"; oId "ce:circPpm1d-215-001"; tissue "ce";
10	ncSplice	gene	75741860	75766625	.	+	.	gene_id "ENSRNOG00000005596"; gene_name "Gdpd1"; gene_source "ncSplice"; gene_biotype "protein_coding";
10	ncSplice	transcript	75741860	75766625	.	+	.	gene_id "ENSRNOG00000005596"; transcript_id "rnCircRNA-137"; gene_name "Gdpd1"; gene_biotype "protein_coding"; transcript_biotype "circRNA"; oId "ce:circGdpd1-228-001"; tissue "ce";
10	ncSplice	exon	75741860	75741995	.	+	.	gene_id "ENSRNOG00000005596"; transcript_id "rnCircRNA-137"; exon_number "1" gene_name "Gdpd1"; gene_biotype "protein_coding"; oId "ce:circGdpd1-228-001"; tissue "ce";
10	ncSplice	exon	75744650	75744695	.	+	.	gene_id "ENSRNOG00000005596"; transcript_id "rnCircRNA-137"; exon_number "2" gene_name "Gdpd1"; gene_biotype "protein_coding"; oId "ce:circGdpd1-228-001"; tissue "ce";
10	ncSplice	exon	75755813	75755931	.	+	.	gene_id "ENSRNOG00000005596"; transcript_id "rnCircRNA-137"; exon_number "3" gene_name "Gdpd1"; gene_biotype "protein_coding"; oId "ce:circGdpd1-228-001"; tissue "ce";
10	ncSplice	exon	75756419	75756508	.	+	.	gene_id "ENSRNOG00000005596"; transcript_id "rnCircRNA-137"; exon_number "4" gene_name "Gdpd1"; gene_biotype "protein_coding"; oId "ce:circGdpd1-228-001"; tissue "ce";
10	ncSplice	exon	75759523	75759656	.	+	.	gene_id "ENSRNOG00000005596"; transcript_id "rnCircRNA-137"; exon_number "5" gene_name "Gdpd1"; gene_biotype "protein_coding"; oId "ce:circGdpd1-228-001"; tissue "ce";
10	ncSplice	exon	75763775	75763834	.	+	.	gene_id "ENSRNOG00000005596"; transcript_id "rnCircRNA-137"; exon_number "6" gene_name "Gdpd1"; gene_biotype "protein_coding"; oId "ce:circGdpd1-228-001"; tissue "ce";
10	ncSplice	exon	75766083	75766134	.	+	.	gene_id "ENSRNOG00000005596"; transcript_id "rnCircRNA-137"; exon_number "7" gene_name "Gdpd1"; gene_biotype "protein_coding"; oId "ce:circGdpd1-228-001"; tissue "ce";
10	ncSplice	exon	75766452	75766625	.	+	.	gene_id "ENSRNOG00000005596"; transcript_id "rnCircRNA-137"; exon_number "8" gene_name "Gdpd1"; gene_biotype "protein_coding"; oId "ce:circGdpd1-228-001"; tissue "ce";
10	ncSplice	gene	8016763	8031440	.	-	.	gene_id "10:8016762:8031440:-1"; gene_name "10:8016762:8031440:-1"; gene_source "ncSplice"; gene_biotype "novel";
10	ncSplice	transcript	8016763	8031440	.	-	.	gene_id "10:8016762:8031440:-1"; transcript_id "rnCircRNA-138"; gene_name "10:8016762:8031440:-1"; gene_biotype "novel"; transcript_biotype "circRNA"; oId "ce:circ10:8016762:8031440:-1-237-001"; tissue "ce";
10	ncSplice	exon	8016763	8026559	.	-	.	gene_id "10:8016762:8031440:-1"; transcript_id "rnCircRNA-138"; exon_number "1" gene_name "10:8016762:8031440:-1"; gene_biotype "novel"; oId "ce:circ10:8016762:8031440:-1-237-001"; tissue "ce";
10	ncSplice	exon	8031393	8031440	.	-	.	gene_id "10:8016762:8031440:-1"; transcript_id "rnCircRNA-138"; exon_number "2" gene_name "10:8016762:8031440:-1"; gene_biotype "novel"; oId "ce:circ10:8016762:8031440:-1-237-001"; tissue "ce";
10	ncSplice	gene	84864317	84874311	.	-	.	gene_id "ENSRNOG00000009370"; gene_name "Tbkbp1"; gene_source "ncSplice"; gene_biotype "protein_coding";
10	ncSplice	transcript	84864317	84874311	.	-	.	gene_id "ENSRNOG00000009370"; transcript_id "rnCircRNA-139"; gene_name "Tbkbp1"; gene_biotype "protein_coding"; transcript_biotype "circRNA"; oId "ce:circTbkbp1-243-001"; tissue "ce";
10	ncSplice	exon	84864317	84864435	.	-	.	gene_id "ENSRNOG00000009370"; transcript_id "rnCircRNA-139"; exon_number "1" gene_name "Tbkbp1"; gene_biotype "protein_coding"; oId "ce:circTbkbp1-243-001"; tissue "ce";
10	ncSplice	exon	84871054	84871115	.	-	.	gene_id "ENSRNOG00000009370"; transcript_id "rnCircRNA-139"; exon_number "2" gene_name "Tbkbp1"; gene_biotype "protein_coding"; oId "ce:circTbkbp1-243-001"; tissue "ce";
10	ncSplice	exon	84871205	84871383	.	-	.	gene_id "ENSRNOG00000009370"; transcript_id "rnCircRNA-139"; exon_number "3" gene_name "Tbkbp1"; gene_biotype "protein_coding"; oId "ce:circTbkbp1-243-001"; tissue "ce";
10	ncSplice	exon	84872118	84872298	.	-	.	gene_id "ENSRNOG00000009370"; transcript_id "rnCircRNA-139"; exon_number "4" gene_name "Tbkbp1"; gene_biotype "protein_coding"; oId "ce:circTbkbp1-243-001"; tissue "ce";
10	ncSplice	exon	84873308	84873412	.	-	.	gene_id "ENSRNOG00000009370"; transcript_id "rnCircRNA-139"; exon_number "5" gene_name "Tbkbp1"; gene_biotype "protein_coding"; oId "ce:circTbkbp1-243-001"; tissue "ce";
10	ncSplice	exon	84873623	84873745	.	-	.	gene_id "ENSRNOG00000009370"; transcript_id "rnCircRNA-139"; exon_number "6" gene_name "Tbkbp1"; gene_biotype "protein_coding"; oId "ce:circTbkbp1-243-001"; tissue "ce";
10	ncSplice	exon	84874058	84874311	.	-	.	gene_id "ENSRNOG00000009370"; transcript_id "rnCircRNA-139"; exon_number "7" gene_name "Tbkbp1"; gene_biotype "protein_coding"; oId "ce:circTbkbp1-243-001"; tissue "ce";
10	ncSplice	gene	90527417	90544151	.	+	.	gene_id "ENSRNOG00000002753"; gene_name "Adam11"; gene_source "ncSplice"; gene_biotype "protein_coding";
10	ncSplice	transcript	90527417	90544151	.	+	.	gene_id "ENSRNOG00000002753"; transcript_id "rnCircRNA-140"; gene_name "Adam11"; gene_biotype "protein_coding"; transcript_biotype "circRNA"; oId "ce:circAdam11-264-002"; tissue "ce";
10	ncSplice	exon	90527417	90528750	.	+	.	gene_id "ENSRNOG00000002753"; transcript_id "rnCircRNA-140"; exon_number "1" gene_name "Adam11"; gene_biotype "protein_coding"; oId "ce:circAdam11-264-002"; tissue "ce";
10	ncSplice	exon	90528908	90528974	.	+	.	gene_id "ENSRNOG00000002753"; transcript_id "rnCircRNA-140"; exon_number "2" gene_name "Adam11"; gene_biotype "protein_coding"; oId "ce:circAdam11-264-002"; tissue "ce";
10	ncSplice	exon	90530043	90530128	.	+	.	gene_id "ENSRNOG00000002753"; transcript_id "rnCircRNA-140"; exon_number "3" gene_name "Adam11"; gene_biotype "protein_coding"; oId "ce:circAdam11-264-002"; tissue "ce";
10	ncSplice	exon	90530211	90530286	.	+	.	gene_id "ENSRNOG00000002753"; transcript_id "rnCircRNA-140"; exon_number "4" gene_name "Adam11"; gene_biotype "protein_coding"; oId "ce:circAdam11-264-002"; tissue "ce";
10	ncSplice	exon	90530685	90530751	.	+	.	gene_id "ENSRNOG00000002753"; transcript_id "rnCircRNA-140"; exon_number "5" gene_name "Adam11"; gene_biotype "protein_coding"; oId "ce:circAdam11-264-002"; tissue "ce";
10	ncSplice	exon	90530815	90530882	.	+	.	gene_id "ENSRNOG00000002753"; transcript_id "rnCircRNA-140"; exon_number "6" gene_name "Adam11"; gene_biotype "protein_coding"; oId "ce:circAdam11-264-002"; tissue "ce";
10	ncSplice	exon	90531251	90531325	.	+	.	gene_id "ENSRNOG00000002753"; transcript_id "rnCircRNA-140"; exon_number "7" gene_name "Adam11"; gene_biotype "protein_coding"; oId "ce:circAdam11-264-002"; tissue "ce";
10	ncSplice	exon	90531405	90531476	.	+	.	gene_id "ENSRNOG00000002753"; transcript_id "rnCircRNA-140"; exon_number "8" gene_name "Adam11"; gene_biotype "protein_coding"; oId "ce:circAdam11-264-002"; tissue "ce";
10	ncSplice	exon	90531633	90531799	.	+	.	gene_id "ENSRNOG00000002753"; transcript_id "rnCircRNA-140"; exon_number "9" gene_name "Adam11"; gene_biotype "protein_coding"; oId "ce:circAdam11-264-002"; tissue "ce";
10	ncSplice	exon	90532164	90532248	.	+	.	gene_id "ENSRNOG00000002753"; transcript_id "rnCircRNA-140"; exon_number "10" gene_name "Adam11"; gene_biotype "protein_coding"; oId "ce:circAdam11-264-002"; tissue "ce";
10	ncSplice	exon	90532347	90532437	.	+	.	gene_id "ENSRNOG00000002753"; transcript_id "rnCircRNA-140"; exon_number "11" gene_name "Adam11"; gene_biotype "protein_coding"; oId "ce:circAdam11-264-002"; tissue "ce";
10	ncSplice	exon	90532550	90532601	.	+	.	gene_id "ENSRNOG00000002753"; transcript_id "rnCircRNA-140"; exon_number "12" gene_name "Adam11"; gene_biotype "protein_coding"; oId "ce:circAdam11-264-002"; tissue "ce";
10	ncSplice	exon	90532986	90533085	.	+	.	gene_id "ENSRNOG00000002753"; transcript_id "rnCircRNA-140"; exon_number "13" gene_name "Adam11"; gene_biotype "protein_coding"; oId "ce:circAdam11-264-002"; tissue "ce";
10	ncSplice	exon	90533162	90533233	.	+	.	gene_id "ENSRNOG00000002753"; transcript_id "rnCircRNA-140"; exon_number "14" gene_name "Adam11"; gene_biotype "protein_coding"; oId "ce:circAdam11-264-002"; tissue "ce";
10	ncSplice	exon	90533337	90533429	.	+	.	gene_id "ENSRNOG00000002753"; transcript_id "rnCircRNA-140"; exon_number "15" gene_name "Adam11"; gene_biotype "protein_coding"; oId "ce:circAdam11-264-002"; tissue "ce";
10	ncSplice	exon	90533774	90533854	.	+	.	gene_id "ENSRNOG00000002753"; transcript_id "rnCircRNA-140"; exon_number "16" gene_name "Adam11"; gene_biotype "protein_coding"; oId "ce:circAdam11-264-002"; tissue "ce";
10	ncSplice	exon	90534371	90534421	.	+	.	gene_id "ENSRNOG00000002753"; transcript_id "rnCircRNA-140"; exon_number "17" gene_name "Adam11"; gene_biotype "protein_coding"; oId "ce:circAdam11-264-002"; tissue "ce";
10	ncSplice	exon	90534524	90534587	.	+	.	gene_id "ENSRNOG00000002753"; transcript_id "rnCircRNA-140"; exon_number "18" gene_name "Adam11"; gene_biotype "protein_coding"; oId "ce:circAdam11-264-002"; tissue "ce";
10	ncSplice	exon	90534834	90534933	.	+	.	gene_id "ENSRNOG00000002753"; transcript_id "rnCircRNA-140"; exon_number "19" gene_name "Adam11"; gene_biotype "protein_coding"; oId "ce:circAdam11-264-002"; tissue "ce";
10	ncSplice	exon	90535083	90535202	.	+	.	gene_id "ENSRNOG00000002753"; transcript_id "rnCircRNA-140"; exon_number "20" gene_name "Adam11"; gene_biotype "protein_coding"; oId "ce:circAdam11-264-002"; tissue "ce";
10	ncSplice	exon	90535302	90535470	.	+	.	gene_id "ENSRNOG00000002753"; transcript_id "rnCircRNA-140"; exon_number "21" gene_name "Adam11"; gene_biotype "protein_coding"; oId "ce:circAdam11-264-002"; tissue "ce";
10	ncSplice	exon	90535562	90535676	.	+	.	gene_id "ENSRNOG00000002753"; transcript_id "rnCircRNA-140"; exon_number "22" gene_name "Adam11"; gene_biotype "protein_coding"; oId "ce:circAdam11-264-002"; tissue "ce";
10	ncSplice	exon	90535761	90535851	.	+	.	gene_id "ENSRNOG00000002753"; transcript_id "rnCircRNA-140"; exon_number "23" gene_name "Adam11"; gene_biotype "protein_coding"; oId "ce:circAdam11-264-002"; tissue "ce";
10	ncSplice	exon	90536420	90536437	.	+	.	gene_id "ENSRNOG00000002753"; transcript_id "rnCircRNA-140"; exon_number "24" gene_name "Adam11"; gene_biotype "protein_coding"; oId "ce:circAdam11-264-002"; tissue "ce";
10	ncSplice	exon	90536922	90544151	.	+	.	gene_id "ENSRNOG00000002753"; transcript_id "rnCircRNA-140"; exon_number "25" gene_name "Adam11"; gene_biotype "protein_coding"; oId "ce:circAdam11-264-002"; tissue "ce";
10	ncSplice	gene	90913060	90931771	.	+	.	gene_id "ENSRNOG00000002989"; gene_name "Nmt1"; gene_source "ncSplice"; gene_biotype "protein_coding";
10	ncSplice	transcript	90913060	90931771	.	+	.	gene_id "ENSRNOG00000002989"; transcript_id "rnCircRNA-141"; gene_name "Nmt1"; gene_biotype "protein_coding"; transcript_biotype "circRNA"; oId "ce:circNmt1-266-001"; tissue "ce";
10	ncSplice	exon	90913060	90913168	.	+	.	gene_id "ENSRNOG00000002989"; transcript_id "rnCircRNA-141"; exon_number "1" gene_name "Nmt1"; gene_biotype "protein_coding"; oId "ce:circNmt1-266-001"; tissue "ce";
10	ncSplice	exon	90916252	90916396	.	+	.	gene_id "ENSRNOG00000002989"; transcript_id "rnCircRNA-141"; exon_number "2" gene_name "Nmt1"; gene_biotype "protein_coding"; oId "ce:circNmt1-266-001"; tissue "ce";
10	ncSplice	exon	90920653	90920771	.	+	.	gene_id "ENSRNOG00000002989"; transcript_id "rnCircRNA-141"; exon_number "3" gene_name "Nmt1"; gene_biotype "protein_coding"; oId "ce:circNmt1-266-001"; tissue "ce";
10	ncSplice	exon	90921548	90921639	.	+	.	gene_id "ENSRNOG00000002989"; transcript_id "rnCircRNA-141"; exon_number "4" gene_name "Nmt1"; gene_biotype "protein_coding"; oId "ce:circNmt1-266-001"; tissue "ce";
10	ncSplice	exon	90922786	90922902	.	+	.	gene_id "ENSRNOG00000002989"; transcript_id "rnCircRNA-141"; exon_number "5" gene_name "Nmt1"; gene_biotype "protein_coding"; oId "ce:circNmt1-266-001"; tissue "ce";
10	ncSplice	exon	90923750	90923920	.	+	.	gene_id "ENSRNOG00000002989"; transcript_id "rnCircRNA-141"; exon_number "6" gene_name "Nmt1"; gene_biotype "protein_coding"; oId "ce:circNmt1-266-001"; tissue "ce";
10	ncSplice	exon	90924562	90924670	.	+	.	gene_id "ENSRNOG00000002989"; transcript_id "rnCircRNA-141"; exon_number "7" gene_name "Nmt1"; gene_biotype "protein_coding"; oId "ce:circNmt1-266-001"; tissue "ce";
10	ncSplice	exon	90926331	90926501	.	+	.	gene_id "ENSRNOG00000002989"; transcript_id "rnCircRNA-141"; exon_number "8" gene_name "Nmt1"; gene_biotype "protein_coding"; oId "ce:circNmt1-266-001"; tissue "ce";
10	ncSplice	exon	90930708	90930875	.	+	.	gene_id "ENSRNOG00000002989"; transcript_id "rnCircRNA-141"; exon_number "9" gene_name "Nmt1"; gene_biotype "protein_coding"; oId "ce:circNmt1-266-001"; tissue "ce";
10	ncSplice	exon	90931634	90931771	.	+	.	gene_id "ENSRNOG00000002989"; transcript_id "rnCircRNA-141"; exon_number "10" gene_name "Nmt1"; gene_biotype "protein_coding"; oId "ce:circNmt1-266-001"; tissue "ce";
10	ncSplice	gene	95050420	95054762	.	-	.	gene_id "10:95050419:95054762:-1"; gene_name "10:95050419:95054762:-1"; gene_source "ncSplice"; gene_biotype "novel";
10	ncSplice	transcript	95050420	95054762	.	-	.	gene_id "10:95050419:95054762:-1"; transcript_id "rnCircRNA-142"; gene_name "10:95050419:95054762:-1"; gene_biotype "novel"; transcript_biotype "circRNA"; oId "ce:circ10:95050419:95054762:-1-278-001"; tissue "ce";
10	ncSplice	exon	95050420	95050602	.	-	.	gene_id "10:95050419:95054762:-1"; transcript_id "rnCircRNA-142"; exon_number "1" gene_name "10:95050419:95054762:-1"; gene_biotype "novel"; oId "ce:circ10:95050419:95054762:-1-278-001"; tissue "ce";
10	ncSplice	exon	95051159	95054762	.	-	.	gene_id "10:95050419:95054762:-1"; transcript_id "rnCircRNA-142"; exon_number "2" gene_name "10:95050419:95054762:-1"; gene_biotype "novel"; oId "ce:circ10:95050419:95054762:-1-278-001"; tissue "ce";
1	ncSplice	gene	103690978	103737707	.	-	.	gene_id "ENSRNOG00000011488"; gene_name "Sergef"; gene_source "ncSplice"; gene_biotype "protein_coding";
1	ncSplice	transcript	103690978	103737707	.	-	.	gene_id "ENSRNOG00000011488"; transcript_id "rnCircRNA-143"; gene_name "Sergef"; gene_biotype "protein_coding"; transcript_biotype "circRNA"; oId "ce:circSergef-301-001"; tissue "ce";
1	ncSplice	exon	103690978	103691144	.	-	.	gene_id "ENSRNOG00000011488"; transcript_id "rnCircRNA-143"; exon_number "1" gene_name "Sergef"; gene_biotype "protein_coding"; oId "ce:circSergef-301-001"; tissue "ce";
1	ncSplice	exon	103715895	103716053	.	-	.	gene_id "ENSRNOG00000011488"; transcript_id "rnCircRNA-143"; exon_number "2" gene_name "Sergef"; gene_biotype "protein_coding"; oId "ce:circSergef-301-001"; tissue "ce";
1	ncSplice	exon	103720142	103720204	.	-	.	gene_id "ENSRNOG00000011488"; transcript_id "rnCircRNA-143"; exon_number "3" gene_name "Sergef"; gene_biotype "protein_coding"; oId "ce:circSergef-301-001"; tissue "ce";
1	ncSplice	exon	103722530	103722643	.	-	.	gene_id "ENSRNOG00000011488"; transcript_id "rnCircRNA-143"; exon_number "4" gene_name "Sergef"; gene_biotype "protein_coding"; oId "ce:circSergef-301-001"; tissue "ce";
1	ncSplice	exon	103727363	103727423	.	-	.	gene_id "ENSRNOG00000011488"; transcript_id "rnCircRNA-143"; exon_number "5" gene_name "Sergef"; gene_biotype "protein_coding"; oId "ce:circSergef-301-001"; tissue "ce";
1	ncSplice	exon	103733467	103733561	.	-	.	gene_id "ENSRNOG00000011488"; transcript_id "rnCircRNA-143"; exon_number "6" gene_name "Sergef"; gene_biotype "protein_coding"; oId "ce:circSergef-301-001"; tissue "ce";
1	ncSplice	exon	103735905	103736060	.	-	.	gene_id "ENSRNOG00000011488"; transcript_id "rnCircRNA-143"; exon_number "7" gene_name "Sergef"; gene_biotype "protein_coding"; oId "ce:circSergef-301-001"; tissue "ce";
1	ncSplice	exon	103737572	103737707	.	-	.	gene_id "ENSRNOG00000011488"; transcript_id "rnCircRNA-143"; exon_number "8" gene_name "Sergef"; gene_biotype "protein_coding"; oId "ce:circSergef-301-001"; tissue "ce";
1	ncSplice	gene	103715895	103737707	.	-	.	gene_id "ENSRNOG00000011488"; gene_name "Sergef"; gene_source "ncSplice"; gene_biotype "protein_coding";
1	ncSplice	transcript	103715895	103737707	.	-	.	gene_id "ENSRNOG00000011488"; transcript_id "rnCircRNA-144"; gene_name "Sergef"; gene_biotype "protein_coding"; transcript_biotype "circRNA"; oId "ce:circSergef-304-001"; tissue "ce";
1	ncSplice	exon	103715895	103716053	.	-	.	gene_id "ENSRNOG00000011488"; transcript_id "rnCircRNA-144"; exon_number "1" gene_name "Sergef"; gene_biotype "protein_coding"; oId "ce:circSergef-304-001"; tissue "ce";
1	ncSplice	exon	103720142	103720204	.	-	.	gene_id "ENSRNOG00000011488"; transcript_id "rnCircRNA-144"; exon_number "2" gene_name "Sergef"; gene_biotype "protein_coding"; oId "ce:circSergef-304-001"; tissue "ce";
1	ncSplice	exon	103722530	103722643	.	-	.	gene_id "ENSRNOG00000011488"; transcript_id "rnCircRNA-144"; exon_number "3" gene_name "Sergef"; gene_biotype "protein_coding"; oId "ce:circSergef-304-001"; tissue "ce";
1	ncSplice	exon	103727363	103727423	.	-	.	gene_id "ENSRNOG00000011488"; transcript_id "rnCircRNA-144"; exon_number "4" gene_name "Sergef"; gene_biotype "protein_coding"; oId "ce:circSergef-304-001"; tissue "ce";
1	ncSplice	exon	103733467	103733561	.	-	.	gene_id "ENSRNOG00000011488"; transcript_id "rnCircRNA-144"; exon_number "5" gene_name "Sergef"; gene_biotype "protein_coding"; oId "ce:circSergef-304-001"; tissue "ce";
1	ncSplice	exon	103735905	103736060	.	-	.	gene_id "ENSRNOG00000011488"; transcript_id "rnCircRNA-144"; exon_number "6" gene_name "Sergef"; gene_biotype "protein_coding"; oId "ce:circSergef-304-001"; tissue "ce";
1	ncSplice	exon	103737572	103737707	.	-	.	gene_id "ENSRNOG00000011488"; transcript_id "rnCircRNA-144"; exon_number "7" gene_name "Sergef"; gene_biotype "protein_coding"; oId "ce:circSergef-304-001"; tissue "ce";
1	ncSplice	gene	118285706	118340206	.	-	.	gene_id "1:118285705:118340206:-1"; gene_name "1:118285705:118340206:-1"; gene_source "ncSplice"; gene_biotype "novel";
1	ncSplice	transcript	118285706	118340206	.	-	.	gene_id "1:118285705:118340206:-1"; transcript_id "rnCircRNA-145"; gene_name "1:118285705:118340206:-1"; gene_biotype "novel"; transcript_biotype "circRNA"; oId "ce:circ1:118285705:118340206:-1-324-001"; tissue "ce";
1	ncSplice	exon	118285706	118297229	.	-	.	gene_id "1:118285705:118340206:-1"; transcript_id "rnCircRNA-145"; exon_number "1" gene_name "1:118285705:118340206:-1"; gene_biotype "novel"; oId "ce:circ1:118285705:118340206:-1-324-001"; tissue "ce";
1	ncSplice	exon	118314406	118340206	.	-	.	gene_id "1:118285705:118340206:-1"; transcript_id "rnCircRNA-145"; exon_number "2" gene_name "1:118285705:118340206:-1"; gene_biotype "novel"; oId "ce:circ1:118285705:118340206:-1-324-001"; tissue "ce";
1	ncSplice	gene	122527044	122587967	.	+	.	gene_id "1:122527043:122587967:1"; gene_name "1:122527043:122587967:1"; gene_source "ncSplice"; gene_biotype "novel";
1	ncSplice	transcript	122527044	122587967	.	+	.	gene_id "1:122527043:122587967:1"; transcript_id "rnCircRNA-146"; gene_name "1:122527043:122587967:1"; gene_biotype "novel"; transcript_biotype "circRNA"; oId "ce:circ1:122527043:122587967:1-327-001"; tissue "ce";
1	ncSplice	exon	122527044	122582960	.	+	.	gene_id "1:122527043:122587967:1"; transcript_id "rnCircRNA-146"; exon_number "1" gene_name "1:122527043:122587967:1"; gene_biotype "novel"; oId "ce:circ1:122527043:122587967:1-327-001"; tissue "ce";
1	ncSplice	exon	122587906	122587967	.	+	.	gene_id "1:122527043:122587967:1"; transcript_id "rnCircRNA-146"; exon_number "2" gene_name "1:122527043:122587967:1"; gene_biotype "novel"; oId "ce:circ1:122527043:122587967:1-327-001"; tissue "ce";
11	ncSplice	gene	27924822	27931882	.	+	.	gene_id "ENSRNOG00000001549"; gene_name "Gabpa"; gene_source "ncSplice"; gene_biotype "protein_coding";
11	ncSplice	transcript	27924822	27931882	.	+	.	gene_id "ENSRNOG00000001549"; transcript_id "rnCircRNA-147"; gene_name "Gabpa"; gene_biotype "protein_coding"; transcript_biotype "circRNA"; oId "ce:circGabpa-337-001"; tissue "ce";
11	ncSplice	exon	27924822	27924924	.	+	.	gene_id "ENSRNOG00000001549"; transcript_id "rnCircRNA-147"; exon_number "1" gene_name "Gabpa"; gene_biotype "protein_coding"; oId "ce:circGabpa-337-001"; tissue "ce";
11	ncSplice	exon	27926914	27927058	.	+	.	gene_id "ENSRNOG00000001549"; transcript_id "rnCircRNA-147"; exon_number "2" gene_name "Gabpa"; gene_biotype "protein_coding"; oId "ce:circGabpa-337-001"; tissue "ce";
11	ncSplice	exon	27929751	27929835	.	+	.	gene_id "ENSRNOG00000001549"; transcript_id "rnCircRNA-147"; exon_number "3" gene_name "Gabpa"; gene_biotype "protein_coding"; oId "ce:circGabpa-337-001"; tissue "ce";
11	ncSplice	exon	27931637	27931882	.	+	.	gene_id "ENSRNOG00000001549"; transcript_id "rnCircRNA-147"; exon_number "4" gene_name "Gabpa"; gene_biotype "protein_coding"; oId "ce:circGabpa-337-001"; tissue "ce";
11	ncSplice	gene	28171553	28174315	.	-	.	gene_id "ENSRNOG00000006997"; gene_name "App"; gene_source "ncSplice"; gene_biotype "protein_coding";
11	ncSplice	transcript	28171553	28174315	.	-	.	gene_id "ENSRNOG00000006997"; transcript_id "rnCircRNA-148"; gene_name "App"; gene_biotype "protein_coding"; transcript_biotype "circRNA"; oId "ce:circApp-339-001"; tissue "ce";
11	ncSplice	exon	28171553	28171746	.	-	.	gene_id "ENSRNOG00000006997"; transcript_id "rnCircRNA-148"; exon_number "1" gene_name "App"; gene_biotype "protein_coding"; oId "ce:circApp-339-001"; tissue "ce";
11	ncSplice	exon	28174203	28174315	.	-	.	gene_id "ENSRNOG00000006997"; transcript_id "rnCircRNA-148"; exon_number "2" gene_name "App"; gene_biotype "protein_coding"; oId "ce:circApp-339-001"; tissue "ce";
1	ncSplice	gene	129305223	129308506	.	-	.	gene_id "ENSRNOG00000047756"; gene_name "Mef2a"; gene_source "ncSplice"; gene_biotype "protein_coding";
1	ncSplice	transcript	129305223	129308506	.	-	.	gene_id "ENSRNOG00000047756"; transcript_id "rnCircRNA-149"; gene_name "Mef2a"; gene_biotype "protein_coding"; transcript_biotype "circRNA"; oId "ce:circMef2a-344-001"; tissue "ce";
1	ncSplice	exon	129305223	129305282	.	-	.	gene_id "ENSRNOG00000047756"; transcript_id "rnCircRNA-149"; exon_number "1" gene_name "Mef2a"; gene_biotype "protein_coding"; oId "ce:circMef2a-344-001"; tissue "ce";
1	ncSplice	exon	129306225	129306444	.	-	.	gene_id "ENSRNOG00000047756"; transcript_id "rnCircRNA-149"; exon_number "2" gene_name "Mef2a"; gene_biotype "protein_coding"; oId "ce:circMef2a-344-001"; tissue "ce";
1	ncSplice	exon	129308369	129308506	.	-	.	gene_id "ENSRNOG00000047756"; transcript_id "rnCircRNA-149"; exon_number "3" gene_name "Mef2a"; gene_biotype "protein_coding"; oId "ce:circMef2a-344-001"; tissue "ce";
1	ncSplice	gene	129305223	129308701	.	-	.	gene_id "ENSRNOG00000047756"; gene_name "Mef2a"; gene_source "ncSplice"; gene_biotype "protein_coding";
1	ncSplice	transcript	129305223	129308701	.	-	.	gene_id "ENSRNOG00000047756"; transcript_id "rnCircRNA-150"; gene_name "Mef2a"; gene_biotype "protein_coding"; transcript_biotype "circRNA"; oId "ce:circMef2a-345-001"; tissue "ce";
1	ncSplice	exon	129305223	129305282	.	-	.	gene_id "ENSRNOG00000047756"; transcript_id "rnCircRNA-150"; exon_number "1" gene_name "Mef2a"; gene_biotype "protein_coding"; oId "ce:circMef2a-345-001"; tissue "ce";
1	ncSplice	exon	129306225	129306444	.	-	.	gene_id "ENSRNOG00000047756"; transcript_id "rnCircRNA-150"; exon_number "2" gene_name "Mef2a"; gene_biotype "protein_coding"; oId "ce:circMef2a-345-001"; tissue "ce";
1	ncSplice	exon	129308369	129308701	.	-	.	gene_id "ENSRNOG00000047756"; transcript_id "rnCircRNA-150"; exon_number "3" gene_name "Mef2a"; gene_biotype "protein_coding"; oId "ce:circMef2a-345-001"; tissue "ce";
11	ncSplice	gene	33588087	33613328	.	-	.	gene_id "ENSRNOG00000021569"; gene_name "Tiam1"; gene_source "ncSplice"; gene_biotype "protein_coding";
11	ncSplice	transcript	33588087	33613328	.	-	.	gene_id "ENSRNOG00000021569"; transcript_id "rnCircRNA-151"; gene_name "Tiam1"; gene_biotype "protein_coding"; transcript_biotype "circRNA"; oId "ce:circTiam1-358-001|ts:circTiam1-670-002"; tissue "ce|ts";
11	ncSplice	exon	33588087	33588190	.	-	.	gene_id "ENSRNOG00000021569"; transcript_id "rnCircRNA-151"; exon_number "1" gene_name "Tiam1"; gene_biotype "protein_coding"; oId "ce:circTiam1-358-001|ts:circTiam1-670-002"; tissue "ce|ts";
11	ncSplice	exon	33600939	33601163	.	-	.	gene_id "ENSRNOG00000021569"; transcript_id "rnCircRNA-151"; exon_number "2" gene_name "Tiam1"; gene_biotype "protein_coding"; oId "ce:circTiam1-358-001|ts:circTiam1-670-002"; tissue "ce|ts";
11	ncSplice	exon	33606645	33606731	.	-	.	gene_id "ENSRNOG00000021569"; transcript_id "rnCircRNA-151"; exon_number "3" gene_name "Tiam1"; gene_biotype "protein_coding"; oId "ce:circTiam1-358-001|ts:circTiam1-670-002"; tissue "ce|ts";
11	ncSplice	exon	33613247	33613328	.	-	.	gene_id "ENSRNOG00000021569"; transcript_id "rnCircRNA-151"; exon_number "4" gene_name "Tiam1"; gene_biotype "protein_coding"; oId "ce:circTiam1-358-001|ts:circTiam1-670-002"; tissue "ce|ts";
11	ncSplice	gene	33600939	33613328	.	-	.	gene_id "ENSRNOG00000021569"; gene_name "Tiam1"; gene_source "ncSplice"; gene_biotype "protein_coding";
11	ncSplice	transcript	33600939	33613328	.	-	.	gene_id "ENSRNOG00000021569"; transcript_id "rnCircRNA-152"; gene_name "Tiam1"; gene_biotype "protein_coding"; transcript_biotype "circRNA"; oId "ce:circTiam1-360-001"; tissue "ce";
11	ncSplice	exon	33600939	33601163	.	-	.	gene_id "ENSRNOG00000021569"; transcript_id "rnCircRNA-152"; exon_number "1" gene_name "Tiam1"; gene_biotype "protein_coding"; oId "ce:circTiam1-360-001"; tissue "ce";
11	ncSplice	exon	33606645	33606731	.	-	.	gene_id "ENSRNOG00000021569"; transcript_id "rnCircRNA-152"; exon_number "2" gene_name "Tiam1"; gene_biotype "protein_coding"; oId "ce:circTiam1-360-001"; tissue "ce";
11	ncSplice	exon	33613247	33613328	.	-	.	gene_id "ENSRNOG00000021569"; transcript_id "rnCircRNA-152"; exon_number "3" gene_name "Tiam1"; gene_biotype "protein_coding"; oId "ce:circTiam1-360-001"; tissue "ce";
11	ncSplice	gene	33649853	33656803	.	-	.	gene_id "ENSRNOG00000021569"; gene_name "Tiam1"; gene_source "ncSplice"; gene_biotype "protein_coding";
11	ncSplice	transcript	33649853	33656803	.	-	.	gene_id "ENSRNOG00000021569"; transcript_id "rnCircRNA-153"; gene_name "Tiam1"; gene_biotype "protein_coding"; transcript_biotype "circRNA"; oId "ce:circTiam1-366-001"; tissue "ce";
11	ncSplice	exon	33649853	33650025	.	-	.	gene_id "ENSRNOG00000021569"; transcript_id "rnCircRNA-153"; exon_number "1" gene_name "Tiam1"; gene_biotype "protein_coding"; oId "ce:circTiam1-366-001"; tissue "ce";
11	ncSplice	exon	33656356	33656803	.	-	.	gene_id "ENSRNOG00000021569"; transcript_id "rnCircRNA-153"; exon_number "2" gene_name "Tiam1"; gene_biotype "protein_coding"; oId "ce:circTiam1-366-001"; tissue "ce";
11	ncSplice	gene	33649853	33671907	.	-	.	gene_id "ENSRNOG00000021569"; gene_name "Tiam1"; gene_source "ncSplice"; gene_biotype "protein_coding";
11	ncSplice	transcript	33649853	33671907	.	-	.	gene_id "ENSRNOG00000021569"; transcript_id "rnCircRNA-154"; gene_name "Tiam1"; gene_biotype "protein_coding"; transcript_biotype "circRNA"; oId "ce:circTiam1-367-001"; tissue "ce";
11	ncSplice	exon	33649853	33650025	.	-	.	gene_id "ENSRNOG00000021569"; transcript_id "rnCircRNA-154"; exon_number "1" gene_name "Tiam1"; gene_biotype "protein_coding"; oId "ce:circTiam1-367-001"; tissue "ce";
11	ncSplice	exon	33656356	33656803	.	-	.	gene_id "ENSRNOG00000021569"; transcript_id "rnCircRNA-154"; exon_number "2" gene_name "Tiam1"; gene_biotype "protein_coding"; oId "ce:circTiam1-367-001"; tissue "ce";
11	ncSplice	exon	33670937	33671907	.	-	.	gene_id "ENSRNOG00000021569"; transcript_id "rnCircRNA-154"; exon_number "3" gene_name "Tiam1"; gene_biotype "protein_coding"; oId "ce:circTiam1-367-001"; tissue "ce";
1	ncSplice	gene	135867683	135873426	.	-	.	gene_id "ENSRNOG00000012716"; gene_name "Chd2"; gene_source "ncSplice"; gene_biotype "protein_coding";
1	ncSplice	transcript	135867683	135873426	.	-	.	gene_id "ENSRNOG00000012716"; transcript_id "rnCircRNA-155"; gene_name "Chd2"; gene_biotype "protein_coding"; transcript_biotype "circRNA"; oId "ce:circChd2-379-001"; tissue "ce";
1	ncSplice	exon	135867683	135867744	.	-	.	gene_id "ENSRNOG00000012716"; transcript_id "rnCircRNA-155"; exon_number "1" gene_name "Chd2"; gene_biotype "protein_coding"; oId "ce:circChd2-379-001"; tissue "ce";
1	ncSplice	exon	135869414	135869500	.	-	.	gene_id "ENSRNOG00000012716"; transcript_id "rnCircRNA-155"; exon_number "2" gene_name "Chd2"; gene_biotype "protein_coding"; oId "ce:circChd2-379-001"; tissue "ce";
1	ncSplice	exon	135873195	135873426	.	-	.	gene_id "ENSRNOG00000012716"; transcript_id "rnCircRNA-155"; exon_number "3" gene_name "Chd2"; gene_biotype "protein_coding"; oId "ce:circChd2-379-001"; tissue "ce";
1	ncSplice	gene	137618731	137684323	.	-	.	gene_id "ENSRNOG00000011160"; gene_name "Sv2b"; gene_source "ncSplice"; gene_biotype "processed_transcript";
1	ncSplice	transcript	137618731	137684323	.	-	.	gene_id "ENSRNOG00000011160"; transcript_id "rnCircRNA-156"; gene_name "Sv2b"; gene_biotype "processed_transcript"; transcript_biotype "circRNA"; oId "ce:circSv2b-381-001"; tissue "ce";
1	ncSplice	exon	137618731	137678951	.	-	.	gene_id "ENSRNOG00000011160"; transcript_id "rnCircRNA-156"; exon_number "1" gene_name "Sv2b"; gene_biotype "processed_transcript"; oId "ce:circSv2b-381-001"; tissue "ce";
1	ncSplice	exon	137683322	137683410	.	-	.	gene_id "ENSRNOG00000011160"; transcript_id "rnCircRNA-156"; exon_number "2" gene_name "Sv2b"; gene_biotype "processed_transcript"; oId "ce:circSv2b-381-001"; tissue "ce";
1	ncSplice	exon	137684213	137684323	.	-	.	gene_id "ENSRNOG00000011160"; transcript_id "rnCircRNA-156"; exon_number "3" gene_name "Sv2b"; gene_biotype "processed_transcript"; oId "ce:circSv2b-381-001"; tissue "ce";
11	ncSplice	gene	37649282	37662426	.	+	.	gene_id "ENSRNOG00000026236"; gene_name "Morc3"; gene_source "ncSplice"; gene_biotype "protein_coding";
11	ncSplice	transcript	37649282	37662426	.	+	.	gene_id "ENSRNOG00000026236"; transcript_id "rnCircRNA-157"; gene_name "Morc3"; gene_biotype "protein_coding"; transcript_biotype "circRNA"; oId "ce:circMorc3-385-001"; tissue "ce";
11	ncSplice	exon	37649282	37649354	.	+	.	gene_id "ENSRNOG00000026236"; transcript_id "rnCircRNA-157"; exon_number "1" gene_name "Morc3"; gene_biotype "protein_coding"; oId "ce:circMorc3-385-001"; tissue "ce";
11	ncSplice	exon	37652309	37652441	.	+	.	gene_id "ENSRNOG00000026236"; transcript_id "rnCircRNA-157"; exon_number "2" gene_name "Morc3"; gene_biotype "protein_coding"; oId "ce:circMorc3-385-001"; tissue "ce";
11	ncSplice	exon	37653268	37653482	.	+	.	gene_id "ENSRNOG00000026236"; transcript_id "rnCircRNA-157"; exon_number "3" gene_name "Morc3"; gene_biotype "protein_coding"; oId "ce:circMorc3-385-001"; tissue "ce";
11	ncSplice	exon	37655112	37655254	.	+	.	gene_id "ENSRNOG00000026236"; transcript_id "rnCircRNA-157"; exon_number "4" gene_name "Morc3"; gene_biotype "protein_coding"; oId "ce:circMorc3-385-001"; tissue "ce";
11	ncSplice	exon	37659902	37660030	.	+	.	gene_id "ENSRNOG00000026236"; transcript_id "rnCircRNA-157"; exon_number "5" gene_name "Morc3"; gene_biotype "protein_coding"; oId "ce:circMorc3-385-001"; tissue "ce";
11	ncSplice	exon	37660639	37660758	.	+	.	gene_id "ENSRNOG00000026236"; transcript_id "rnCircRNA-157"; exon_number "6" gene_name "Morc3"; gene_biotype "protein_coding"; oId "ce:circMorc3-385-001"; tissue "ce";
11	ncSplice	exon	37662329	37662426	.	+	.	gene_id "ENSRNOG00000026236"; transcript_id "rnCircRNA-157"; exon_number "7" gene_name "Morc3"; gene_biotype "protein_coding"; oId "ce:circMorc3-385-001"; tissue "ce";
11	ncSplice	gene	37655104	37660030	.	+	.	gene_id "ENSRNOG00000026236"; gene_name "Morc3"; gene_source "ncSplice"; gene_biotype "protein_coding";
11	ncSplice	transcript	37655104	37660030	.	+	.	gene_id "ENSRNOG00000026236"; transcript_id "rnCircRNA-158"; gene_name "Morc3"; gene_biotype "protein_coding"; transcript_biotype "circRNA"; oId "ce:circMorc3-388-001"; tissue "ce";
11	ncSplice	exon	37655104	37655254	.	+	.	gene_id "ENSRNOG00000026236"; transcript_id "rnCircRNA-158"; exon_number "1" gene_name "Morc3"; gene_biotype "protein_coding"; oId "ce:circMorc3-388-001"; tissue "ce";
11	ncSplice	exon	37659902	37660030	.	+	.	gene_id "ENSRNOG00000026236"; transcript_id "rnCircRNA-158"; exon_number "2" gene_name "Morc3"; gene_biotype "protein_coding"; oId "ce:circMorc3-388-001"; tissue "ce";
1	ncSplice	gene	137678787	137692389	.	-	.	gene_id "ENSRNOG00000011160"; gene_name "Sv2b"; gene_source "ncSplice"; gene_biotype "processed_transcript";
1	ncSplice	transcript	137678787	137692389	.	-	.	gene_id "ENSRNOG00000011160"; transcript_id "rnCircRNA-159"; gene_name "Sv2b"; gene_biotype "processed_transcript"; transcript_biotype "circRNA"; oId "ce:circSv2b-393-001"; tissue "ce";
1	ncSplice	exon	137678787	137678951	.	-	.	gene_id "ENSRNOG00000011160"; transcript_id "rnCircRNA-159"; exon_number "1" gene_name "Sv2b"; gene_biotype "processed_transcript"; oId "ce:circSv2b-393-001"; tissue "ce";
1	ncSplice	exon	137683322	137683410	.	-	.	gene_id "ENSRNOG00000011160"; transcript_id "rnCircRNA-159"; exon_number "2" gene_name "Sv2b"; gene_biotype "processed_transcript"; oId "ce:circSv2b-393-001"; tissue "ce";
1	ncSplice	exon	137684213	137692076	.	-	.	gene_id "ENSRNOG00000011160"; transcript_id "rnCircRNA-159"; exon_number "3" gene_name "Sv2b"; gene_biotype "processed_transcript"; oId "ce:circSv2b-393-001"; tissue "ce";
1	ncSplice	exon	137692256	137692389	.	-	.	gene_id "ENSRNOG00000011160"; transcript_id "rnCircRNA-159"; exon_number "4" gene_name "Sv2b"; gene_biotype "processed_transcript"; oId "ce:circSv2b-393-001"; tissue "ce";
11	ncSplice	gene	38199286	38201886	.	+	.	gene_id "ENSRNOG00000001682"; gene_name "Ttc3"; gene_source "ncSplice"; gene_biotype "protein_coding";
11	ncSplice	transcript	38199286	38201886	.	+	.	gene_id "ENSRNOG00000001682"; transcript_id "rnCircRNA-160"; gene_name "Ttc3"; gene_biotype "protein_coding"; transcript_biotype "circRNA"; oId "ce:circTtc3-400-001"; tissue "ce";
11	ncSplice	exon	38199286	38200528	.	+	.	gene_id "ENSRNOG00000001682"; transcript_id "rnCircRNA-160"; exon_number "1" gene_name "Ttc3"; gene_biotype "protein_coding"; oId "ce:circTtc3-400-001"; tissue "ce";
11	ncSplice	exon	38200807	38200849	.	+	.	gene_id "ENSRNOG00000001682"; transcript_id "rnCircRNA-160"; exon_number "2" gene_name "Ttc3"; gene_biotype "protein_coding"; oId "ce:circTtc3-400-001"; tissue "ce";
11	ncSplice	exon	38201246	38201396	.	+	.	gene_id "ENSRNOG00000001682"; transcript_id "rnCircRNA-160"; exon_number "3" gene_name "Ttc3"; gene_biotype "protein_coding"; oId "ce:circTtc3-400-001"; tissue "ce";
11	ncSplice	exon	38201799	38201886	.	+	.	gene_id "ENSRNOG00000001682"; transcript_id "rnCircRNA-160"; exon_number "4" gene_name "Ttc3"; gene_biotype "protein_coding"; oId "ce:circTtc3-400-001"; tissue "ce";
11	ncSplice	gene	38200374	38218881	.	+	.	gene_id "ENSRNOG00000001682"; gene_name "Ttc3"; gene_source "ncSplice"; gene_biotype "protein_coding";
11	ncSplice	transcript	38200374	38218881	.	+	.	gene_id "ENSRNOG00000001682"; transcript_id "rnCircRNA-161"; gene_name "Ttc3"; gene_biotype "protein_coding"; transcript_biotype "circRNA"; oId "ce:circTtc3-405-001"; tissue "ce";
11	ncSplice	exon	38200374	38200528	.	+	.	gene_id "ENSRNOG00000001682"; transcript_id "rnCircRNA-161"; exon_number "1" gene_name "Ttc3"; gene_biotype "protein_coding"; oId "ce:circTtc3-405-001"; tissue "ce";
11	ncSplice	exon	38200807	38200849	.	+	.	gene_id "ENSRNOG00000001682"; transcript_id "rnCircRNA-161"; exon_number "2" gene_name "Ttc3"; gene_biotype "protein_coding"; oId "ce:circTtc3-405-001"; tissue "ce";
11	ncSplice	exon	38201246	38201396	.	+	.	gene_id "ENSRNOG00000001682"; transcript_id "rnCircRNA-161"; exon_number "3" gene_name "Ttc3"; gene_biotype "protein_coding"; oId "ce:circTtc3-405-001"; tissue "ce";
11	ncSplice	exon	38201799	38201886	.	+	.	gene_id "ENSRNOG00000001682"; transcript_id "rnCircRNA-161"; exon_number "4" gene_name "Ttc3"; gene_biotype "protein_coding"; oId "ce:circTtc3-405-001"; tissue "ce";
11	ncSplice	exon	38203849	38203902	.	+	.	gene_id "ENSRNOG00000001682"; transcript_id "rnCircRNA-161"; exon_number "5" gene_name "Ttc3"; gene_biotype "protein_coding"; oId "ce:circTtc3-405-001"; tissue "ce";
11	ncSplice	exon	38204577	38204697	.	+	.	gene_id "ENSRNOG00000001682"; transcript_id "rnCircRNA-161"; exon_number "6" gene_name "Ttc3"; gene_biotype "protein_coding"; oId "ce:circTtc3-405-001"; tissue "ce";
11	ncSplice	exon	38206610	38206695	.	+	.	gene_id "ENSRNOG00000001682"; transcript_id "rnCircRNA-161"; exon_number "7" gene_name "Ttc3"; gene_biotype "protein_coding"; oId "ce:circTtc3-405-001"; tissue "ce";
11	ncSplice	exon	38208128	38208222	.	+	.	gene_id "ENSRNOG00000001682"; transcript_id "rnCircRNA-161"; exon_number "8" gene_name "Ttc3"; gene_biotype "protein_coding"; oId "ce:circTtc3-405-001"; tissue "ce";
11	ncSplice	exon	38209188	38209250	.	+	.	gene_id "ENSRNOG00000001682"; transcript_id "rnCircRNA-161"; exon_number "9" gene_name "Ttc3"; gene_biotype "protein_coding"; oId "ce:circTtc3-405-001"; tissue "ce";
11	ncSplice	exon	38218827	38218881	.	+	.	gene_id "ENSRNOG00000001682"; transcript_id "rnCircRNA-161"; exon_number "10" gene_name "Ttc3"; gene_biotype "protein_coding"; oId "ce:circTtc3-405-001"; tissue "ce";
1	ncSplice	gene	140921069	140934027	.	-	.	gene_id "ENSRNOG00000018674"; gene_name "Ntrk3"; gene_source "ncSplice"; gene_biotype "protein_coding";
1	ncSplice	transcript	140921069	140934027	.	-	.	gene_id "ENSRNOG00000018674"; transcript_id "rnCircRNA-162"; gene_name "Ntrk3"; gene_biotype "protein_coding"; transcript_biotype "circRNA"; oId "ce:circNtrk3-419-001"; tissue "ce";
1	ncSplice	exon	140921069	140921312	.	-	.	gene_id "ENSRNOG00000018674"; transcript_id "rnCircRNA-162"; exon_number "1" gene_name "Ntrk3"; gene_biotype "protein_coding"; oId "ce:circNtrk3-419-001"; tissue "ce";
1	ncSplice	exon	140924527	140924699	.	-	.	gene_id "ENSRNOG00000018674"; transcript_id "rnCircRNA-162"; exon_number "2" gene_name "Ntrk3"; gene_biotype "protein_coding"; oId "ce:circNtrk3-419-001"; tissue "ce";
1	ncSplice	exon	140933897	140934027	.	-	.	gene_id "ENSRNOG00000018674"; transcript_id "rnCircRNA-162"; exon_number "3" gene_name "Ntrk3"; gene_biotype "protein_coding"; oId "ce:circNtrk3-419-001"; tissue "ce";
11	ncSplice	gene	40975769	40991325	.	-	.	gene_id "11:40975768:40991325:-1"; gene_name "11:40975768:40991325:-1"; gene_source "ncSplice"; gene_biotype "novel";
11	ncSplice	transcript	40975769	40991325	.	-	.	gene_id "11:40975768:40991325:-1"; transcript_id "rnCircRNA-163"; gene_name "11:40975768:40991325:-1"; gene_biotype "novel"; transcript_biotype "circRNA"; oId "ce:circ11:40975768:40991325:-1-420-001"; tissue "ce";
11	ncSplice	exon	40975769	40975915	.	-	.	gene_id "11:40975768:40991325:-1"; transcript_id "rnCircRNA-163"; exon_number "1" gene_name "11:40975768:40991325:-1"; gene_biotype "novel"; oId "ce:circ11:40975768:40991325:-1-420-001"; tissue "ce";
11	ncSplice	exon	40991008	40991325	.	-	.	gene_id "11:40975768:40991325:-1"; transcript_id "rnCircRNA-163"; exon_number "2" gene_name "11:40975768:40991325:-1"; gene_biotype "novel"; oId "ce:circ11:40975768:40991325:-1-420-001"; tissue "ce";
1	ncSplice	gene	141108842	141120053	.	-	.	gene_id "ENSRNOG00000018674"; gene_name "Ntrk3"; gene_source "ncSplice"; gene_biotype "protein_coding";
1	ncSplice	transcript	141108842	141120053	.	-	.	gene_id "ENSRNOG00000018674"; transcript_id "rnCircRNA-164"; gene_name "Ntrk3"; gene_biotype "protein_coding"; transcript_biotype "circRNA"; oId "ce:circNtrk3-422-001"; tissue "ce";
1	ncSplice	exon	141108842	141108944	.	-	.	gene_id "ENSRNOG00000018674"; transcript_id "rnCircRNA-164"; exon_number "1" gene_name "Ntrk3"; gene_biotype "protein_coding"; oId "ce:circNtrk3-422-001"; tissue "ce";
1	ncSplice	exon	141109833	141109897	.	-	.	gene_id "ENSRNOG00000018674"; transcript_id "rnCircRNA-164"; exon_number "2" gene_name "Ntrk3"; gene_biotype "protein_coding"; oId "ce:circNtrk3-422-001"; tissue "ce";
1	ncSplice	exon	141111264	141111287	.	-	.	gene_id "ENSRNOG00000018674"; transcript_id "rnCircRNA-164"; exon_number "3" gene_name "Ntrk3"; gene_biotype "protein_coding"; oId "ce:circNtrk3-422-001"; tissue "ce";
1	ncSplice	exon	141117420	141117716	.	-	.	gene_id "ENSRNOG00000018674"; transcript_id "rnCircRNA-164"; exon_number "4" gene_name "Ntrk3"; gene_biotype "protein_coding"; oId "ce:circNtrk3-422-001"; tissue "ce";
1	ncSplice	exon	141118165	141118306	.	-	.	gene_id "ENSRNOG00000018674"; transcript_id "rnCircRNA-164"; exon_number "5" gene_name "Ntrk3"; gene_biotype "protein_coding"; oId "ce:circNtrk3-422-001"; tissue "ce";
1	ncSplice	exon	141118696	141118838	.	-	.	gene_id "ENSRNOG00000018674"; transcript_id "rnCircRNA-164"; exon_number "6" gene_name "Ntrk3"; gene_biotype "protein_coding"; oId "ce:circNtrk3-422-001"; tissue "ce";
1	ncSplice	exon	141119896	141120053	.	-	.	gene_id "ENSRNOG00000018674"; transcript_id "rnCircRNA-164"; exon_number "7" gene_name "Ntrk3"; gene_biotype "protein_coding"; oId "ce:circNtrk3-422-001"; tissue "ce";
1	ncSplice	gene	144656261	144662670	.	-	.	gene_id "ENSRNOG00000019740"; gene_name "Hdgfrp3"; gene_source "ncSplice"; gene_biotype "protein_coding";
1	ncSplice	transcript	144656261	144662670	.	-	.	gene_id "ENSRNOG00000019740"; transcript_id "rnCircRNA-165"; gene_name "Hdgfrp3"; gene_biotype "protein_coding"; transcript_biotype "circRNA"; oId "ce:circHdgfrp3-431-001"; tissue "ce";
1	ncSplice	exon	144656261	144656407	.	-	.	gene_id "ENSRNOG00000019740"; transcript_id "rnCircRNA-165"; exon_number "1" gene_name "Hdgfrp3"; gene_biotype "protein_coding"; oId "ce:circHdgfrp3-431-001"; tissue "ce";
1	ncSplice	exon	144661925	144662080	.	-	.	gene_id "ENSRNOG00000019740"; transcript_id "rnCircRNA-165"; exon_number "2" gene_name "Hdgfrp3"; gene_biotype "protein_coding"; oId "ce:circHdgfrp3-431-001"; tissue "ce";
1	ncSplice	exon	144662532	144662670	.	-	.	gene_id "ENSRNOG00000019740"; transcript_id "rnCircRNA-165"; exon_number "3" gene_name "Hdgfrp3"; gene_biotype "protein_coding"; oId "ce:circHdgfrp3-431-001"; tissue "ce";
1	ncSplice	gene	144656261	144667509	.	-	.	gene_id "ENSRNOG00000019740"; gene_name "Hdgfrp3"; gene_source "ncSplice"; gene_biotype "protein_coding";
1	ncSplice	transcript	144656261	144667509	.	-	.	gene_id "ENSRNOG00000019740"; transcript_id "rnCircRNA-166"; gene_name "Hdgfrp3"; gene_biotype "protein_coding"; transcript_biotype "circRNA"; oId "ce:circHdgfrp3-432-001"; tissue "ce";
1	ncSplice	exon	144656261	144656407	.	-	.	gene_id "ENSRNOG00000019740"; transcript_id "rnCircRNA-166"; exon_number "1" gene_name "Hdgfrp3"; gene_biotype "protein_coding"; oId "ce:circHdgfrp3-432-001"; tissue "ce";
1	ncSplice	exon	144661925	144662080	.	-	.	gene_id "ENSRNOG00000019740"; transcript_id "rnCircRNA-166"; exon_number "2" gene_name "Hdgfrp3"; gene_biotype "protein_coding"; oId "ce:circHdgfrp3-432-001"; tissue "ce";
1	ncSplice	exon	144662532	144662670	.	-	.	gene_id "ENSRNOG00000019740"; transcript_id "rnCircRNA-166"; exon_number "3" gene_name "Hdgfrp3"; gene_biotype "protein_coding"; oId "ce:circHdgfrp3-432-001"; tissue "ce";
1	ncSplice	exon	144667433	144667509	.	-	.	gene_id "ENSRNOG00000019740"; transcript_id "rnCircRNA-166"; exon_number "4" gene_name "Hdgfrp3"; gene_biotype "protein_coding"; oId "ce:circHdgfrp3-432-001"; tissue "ce";
11	ncSplice	gene	48683232	48693106	.	-	.	gene_id "ENSRNOG00000001640"; gene_name "Tomm70a"; gene_source "ncSplice"; gene_biotype "protein_coding";
11	ncSplice	transcript	48683232	48693106	.	-	.	gene_id "ENSRNOG00000001640"; transcript_id "rnCircRNA-167"; gene_name "Tomm70a"; gene_biotype "protein_coding"; transcript_biotype "circRNA"; oId "ce:circTomm70a-440-001"; tissue "ce";
11	ncSplice	exon	48683232	48683366	.	-	.	gene_id "ENSRNOG00000001640"; transcript_id "rnCircRNA-167"; exon_number "1" gene_name "Tomm70a"; gene_biotype "protein_coding"; oId "ce:circTomm70a-440-001"; tissue "ce";
11	ncSplice	exon	48685186	48691534	.	-	.	gene_id "ENSRNOG00000001640"; transcript_id "rnCircRNA-167"; exon_number "2" gene_name "Tomm70a"; gene_biotype "protein_coding"; oId "ce:circTomm70a-440-001"; tissue "ce";
11	ncSplice	exon	48692933	48693106	.	-	.	gene_id "ENSRNOG00000001640"; transcript_id "rnCircRNA-167"; exon_number "3" gene_name "Tomm70a"; gene_biotype "protein_coding"; oId "ce:circTomm70a-440-001"; tissue "ce";
11	ncSplice	gene	50346239	50350577	.	+	.	gene_id "ENSRNOG00000001609"; gene_name "Cep97"; gene_source "ncSplice"; gene_biotype "protein_coding";
11	ncSplice	transcript	50346239	50350577	.	+	.	gene_id "ENSRNOG00000001609"; transcript_id "rnCircRNA-168"; gene_name "Cep97"; gene_biotype "protein_coding"; transcript_biotype "circRNA"; oId "ce:circCep97-448-001|ts:circCep97-772-001"; tissue "ce|ts";
11	ncSplice	exon	50346239	50346992	.	+	.	gene_id "ENSRNOG00000001609"; transcript_id "rnCircRNA-168"; exon_number "1" gene_name "Cep97"; gene_biotype "protein_coding"; oId "ce:circCep97-448-001|ts:circCep97-772-001"; tissue "ce|ts";
11	ncSplice	exon	50350502	50350577	.	+	.	gene_id "ENSRNOG00000001609"; transcript_id "rnCircRNA-168"; exon_number "2" gene_name "Cep97"; gene_biotype "protein_coding"; oId "ce:circCep97-448-001|ts:circCep97-772-001"; tissue "ce|ts";
1	ncSplice	gene	154704736	154707672	.	-	.	gene_id "ENSRNOG00000050401"; gene_name "Vbp1"; gene_source "ncSplice"; gene_biotype "protein_coding";
1	ncSplice	transcript	154704736	154707672	.	-	.	gene_id "ENSRNOG00000050401"; transcript_id "rnCircRNA-169"; gene_name "Vbp1"; gene_biotype "protein_coding"; transcript_biotype "circRNA"; oId "ce:circVbp1-452-001"; tissue "ce";
1	ncSplice	exon	154704736	154704870	.	-	.	gene_id "ENSRNOG00000050401"; transcript_id "rnCircRNA-169"; exon_number "1" gene_name "Vbp1"; gene_biotype "protein_coding"; oId "ce:circVbp1-452-001"; tissue "ce";
1	ncSplice	exon	154706010	154706108	.	-	.	gene_id "ENSRNOG00000050401"; transcript_id "rnCircRNA-169"; exon_number "2" gene_name "Vbp1"; gene_biotype "protein_coding"; oId "ce:circVbp1-452-001"; tissue "ce";
1	ncSplice	exon	154707135	154707201	.	-	.	gene_id "ENSRNOG00000050401"; transcript_id "rnCircRNA-169"; exon_number "3" gene_name "Vbp1"; gene_biotype "protein_coding"; oId "ce:circVbp1-452-001"; tissue "ce";
1	ncSplice	exon	154707548	154707672	.	-	.	gene_id "ENSRNOG00000050401"; transcript_id "rnCircRNA-169"; exon_number "4" gene_name "Vbp1"; gene_biotype "protein_coding"; oId "ce:circVbp1-452-001"; tissue "ce";
11	ncSplice	gene	56323497	56347313	.	+	.	gene_id "ENSRNOG00000001971"; gene_name "Bbx"; gene_source "ncSplice"; gene_biotype "protein_coding";
11	ncSplice	transcript	56323497	56347313	.	+	.	gene_id "ENSRNOG00000001971"; transcript_id "rnCircRNA-170"; gene_name "Bbx"; gene_biotype "protein_coding"; transcript_biotype "circRNA"; oId "ce:circBbx-456-001|ts:circBbx-785-001"; tissue "ce|ts";
11	ncSplice	exon	56323497	56323692	.	+	.	gene_id "ENSRNOG00000001971"; transcript_id "rnCircRNA-170"; exon_number "1" gene_name "Bbx"; gene_biotype "protein_coding"; oId "ce:circBbx-456-001|ts:circBbx-785-001"; tissue "ce|ts";
11	ncSplice	exon	56327673	56327740	.	+	.	gene_id "ENSRNOG00000001971"; transcript_id "rnCircRNA-170"; exon_number "2" gene_name "Bbx"; gene_biotype "protein_coding"; oId "ce:circBbx-456-001|ts:circBbx-785-001"; tissue "ce|ts";
11	ncSplice	exon	56337273	56337353	.	+	.	gene_id "ENSRNOG00000001971"; transcript_id "rnCircRNA-170"; exon_number "3" gene_name "Bbx"; gene_biotype "protein_coding"; oId "ce:circBbx-456-001|ts:circBbx-785-001"; tissue "ce|ts";
11	ncSplice	exon	56340494	56340568	.	+	.	gene_id "ENSRNOG00000001971"; transcript_id "rnCircRNA-170"; exon_number "4" gene_name "Bbx"; gene_biotype "protein_coding"; oId "ce:circBbx-456-001|ts:circBbx-785-001"; tissue "ce|ts";
11	ncSplice	exon	56347233	56347313	.	+	.	gene_id "ENSRNOG00000001971"; transcript_id "rnCircRNA-170"; exon_number "5" gene_name "Bbx"; gene_biotype "protein_coding"; oId "ce:circBbx-456-001|ts:circBbx-785-001"; tissue "ce|ts";
11	ncSplice	gene	56327673	56347313	.	+	.	gene_id "ENSRNOG00000001971"; gene_name "Bbx"; gene_source "ncSplice"; gene_biotype "protein_coding";
11	ncSplice	transcript	56327673	56347313	.	+	.	gene_id "ENSRNOG00000001971"; transcript_id "rnCircRNA-171"; gene_name "Bbx"; gene_biotype "protein_coding"; transcript_biotype "circRNA"; oId "ce:circBbx-457-001|ts:circBbx-786-001"; tissue "ce|ts";
11	ncSplice	exon	56327673	56327740	.	+	.	gene_id "ENSRNOG00000001971"; transcript_id "rnCircRNA-171"; exon_number "1" gene_name "Bbx"; gene_biotype "protein_coding"; oId "ce:circBbx-457-001|ts:circBbx-786-001"; tissue "ce|ts";
11	ncSplice	exon	56337273	56337353	.	+	.	gene_id "ENSRNOG00000001971"; transcript_id "rnCircRNA-171"; exon_number "2" gene_name "Bbx"; gene_biotype "protein_coding"; oId "ce:circBbx-457-001|ts:circBbx-786-001"; tissue "ce|ts";
11	ncSplice	exon	56340494	56340568	.	+	.	gene_id "ENSRNOG00000001971"; transcript_id "rnCircRNA-171"; exon_number "3" gene_name "Bbx"; gene_biotype "protein_coding"; oId "ce:circBbx-457-001|ts:circBbx-786-001"; tissue "ce|ts";
11	ncSplice	exon	56347233	56347313	.	+	.	gene_id "ENSRNOG00000001971"; transcript_id "rnCircRNA-171"; exon_number "4" gene_name "Bbx"; gene_biotype "protein_coding"; oId "ce:circBbx-457-001|ts:circBbx-786-001"; tissue "ce|ts";
1	ncSplice	gene	156650818	156673263	.	-	.	gene_id "ENSRNOG00000013770"; gene_name "Folh1"; gene_source "ncSplice"; gene_biotype "protein_coding";
1	ncSplice	transcript	156650818	156673263	.	-	.	gene_id "ENSRNOG00000013770"; transcript_id "rnCircRNA-172"; gene_name "Folh1"; gene_biotype "protein_coding"; transcript_biotype "circRNA"; oId "ce:circFolh1-458-001"; tissue "ce";
1	ncSplice	exon	156650818	156650881	.	-	.	gene_id "ENSRNOG00000013770"; transcript_id "rnCircRNA-172"; exon_number "1" gene_name "Folh1"; gene_biotype "protein_coding"; oId "ce:circFolh1-458-001"; tissue "ce";
1	ncSplice	exon	156664900	156664982	.	-	.	gene_id "ENSRNOG00000013770"; transcript_id "rnCircRNA-172"; exon_number "2" gene_name "Folh1"; gene_biotype "protein_coding"; oId "ce:circFolh1-458-001"; tissue "ce";
1	ncSplice	exon	156666996	156667115	.	-	.	gene_id "ENSRNOG00000013770"; transcript_id "rnCircRNA-172"; exon_number "3" gene_name "Folh1"; gene_biotype "protein_coding"; oId "ce:circFolh1-458-001"; tissue "ce";
1	ncSplice	exon	156670025	156670110	.	-	.	gene_id "ENSRNOG00000013770"; transcript_id "rnCircRNA-172"; exon_number "4" gene_name "Folh1"; gene_biotype "protein_coding"; oId "ce:circFolh1-458-001"; tissue "ce";
1	ncSplice	exon	156670687	156670785	.	-	.	gene_id "ENSRNOG00000013770"; transcript_id "rnCircRNA-172"; exon_number "5" gene_name "Folh1"; gene_biotype "protein_coding"; oId "ce:circFolh1-458-001"; tissue "ce";
1	ncSplice	exon	156673170	156673263	.	-	.	gene_id "ENSRNOG00000013770"; transcript_id "rnCircRNA-172"; exon_number "6" gene_name "Folh1"; gene_biotype "protein_coding"; oId "ce:circFolh1-458-001"; tissue "ce";
11	ncSplice	gene	62089024	62116864	.	-	.	gene_id "ENSRNOG00000002176"; gene_name "Pvrl3"; gene_source "ncSplice"; gene_biotype "protein_coding";
11	ncSplice	transcript	62089024	62116864	.	-	.	gene_id "ENSRNOG00000002176"; transcript_id "rnCircRNA-173"; gene_name "Pvrl3"; gene_biotype "protein_coding"; transcript_biotype "circRNA"; oId "ce:circPvrl3-469-001"; tissue "ce";
11	ncSplice	exon	62089024	62089108	.	-	.	gene_id "ENSRNOG00000002176"; transcript_id "rnCircRNA-173"; exon_number "1" gene_name "Pvrl3"; gene_biotype "protein_coding"; oId "ce:circPvrl3-469-001"; tissue "ce";
11	ncSplice	exon	62090572	62090710	.	-	.	gene_id "ENSRNOG00000002176"; transcript_id "rnCircRNA-173"; exon_number "2" gene_name "Pvrl3"; gene_biotype "protein_coding"; oId "ce:circPvrl3-469-001"; tissue "ce";
11	ncSplice	exon	62106895	62107046	.	-	.	gene_id "ENSRNOG00000002176"; transcript_id "rnCircRNA-173"; exon_number "3" gene_name "Pvrl3"; gene_biotype "protein_coding"; oId "ce:circPvrl3-469-001"; tissue "ce";
11	ncSplice	exon	62110011	62110128	.	-	.	gene_id "ENSRNOG00000002176"; transcript_id "rnCircRNA-173"; exon_number "4" gene_name "Pvrl3"; gene_biotype "protein_coding"; oId "ce:circPvrl3-469-001"; tissue "ce";
11	ncSplice	exon	62111657	62111953	.	-	.	gene_id "ENSRNOG00000002176"; transcript_id "rnCircRNA-173"; exon_number "5" gene_name "Pvrl3"; gene_biotype "protein_coding"; oId "ce:circPvrl3-469-001"; tissue "ce";
11	ncSplice	exon	62116523	62116864	.	-	.	gene_id "ENSRNOG00000002176"; transcript_id "rnCircRNA-173"; exon_number "6" gene_name "Pvrl3"; gene_biotype "protein_coding"; oId "ce:circPvrl3-469-001"; tissue "ce";
11	ncSplice	gene	65229095	65230341	.	+	.	gene_id "ENSRNOG00000002041"; gene_name "Boc"; gene_source "ncSplice"; gene_biotype "protein_coding";
11	ncSplice	transcript	65229095	65230341	.	+	.	gene_id "ENSRNOG00000002041"; transcript_id "rnCircRNA-174"; gene_name "Boc"; gene_biotype "protein_coding"; transcript_biotype "circRNA"; oId "ce:circBoc-473-001"; tissue "ce";
11	ncSplice	exon	65229095	65229271	.	+	.	gene_id "ENSRNOG00000002041"; transcript_id "rnCircRNA-174"; exon_number "1" gene_name "Boc"; gene_biotype "protein_coding"; oId "ce:circBoc-473-001"; tissue "ce";
11	ncSplice	exon	65230063	65230341	.	+	.	gene_id "ENSRNOG00000002041"; transcript_id "rnCircRNA-174"; exon_number "2" gene_name "Boc"; gene_biotype "protein_coding"; oId "ce:circBoc-473-001"; tissue "ce";
11	ncSplice	gene	69492681	69521210	.	+	.	gene_id "ENSRNOG00000002496"; gene_name "Stxbp5l"; gene_source "ncSplice"; gene_biotype "protein_coding";
11	ncSplice	transcript	69492681	69521210	.	+	.	gene_id "ENSRNOG00000002496"; transcript_id "rnCircRNA-175"; gene_name "Stxbp5l"; gene_biotype "protein_coding"; transcript_biotype "circRNA"; oId "ce:circStxbp5l-483-001"; tissue "ce";
11	ncSplice	exon	69492681	69492804	.	+	.	gene_id "ENSRNOG00000002496"; transcript_id "rnCircRNA-175"; exon_number "1" gene_name "Stxbp5l"; gene_biotype "protein_coding"; oId "ce:circStxbp5l-483-001"; tissue "ce";
11	ncSplice	exon	69499847	69499925	.	+	.	gene_id "ENSRNOG00000002496"; transcript_id "rnCircRNA-175"; exon_number "2" gene_name "Stxbp5l"; gene_biotype "protein_coding"; oId "ce:circStxbp5l-483-001"; tissue "ce";
11	ncSplice	exon	69516155	69516309	.	+	.	gene_id "ENSRNOG00000002496"; transcript_id "rnCircRNA-175"; exon_number "3" gene_name "Stxbp5l"; gene_biotype "protein_coding"; oId "ce:circStxbp5l-483-001"; tissue "ce";
11	ncSplice	exon	69521138	69521210	.	+	.	gene_id "ENSRNOG00000002496"; transcript_id "rnCircRNA-175"; exon_number "4" gene_name "Stxbp5l"; gene_biotype "protein_coding"; oId "ce:circStxbp5l-483-001"; tissue "ce";
11	ncSplice	gene	69549835	69568807	.	+	.	gene_id "ENSRNOG00000002496"; gene_name "Stxbp5l"; gene_source "ncSplice"; gene_biotype "protein_coding";
11	ncSplice	transcript	69549835	69568807	.	+	.	gene_id "ENSRNOG00000002496"; transcript_id "rnCircRNA-176"; gene_name "Stxbp5l"; gene_biotype "protein_coding"; transcript_biotype "circRNA"; oId "ce:circStxbp5l-484-001"; tissue "ce";
11	ncSplice	exon	69549835	69549982	.	+	.	gene_id "ENSRNOG00000002496"; transcript_id "rnCircRNA-176"; exon_number "1" gene_name "Stxbp5l"; gene_biotype "protein_coding"; oId "ce:circStxbp5l-484-001"; tissue "ce";
11	ncSplice	exon	69551288	69551355	.	+	.	gene_id "ENSRNOG00000002496"; transcript_id "rnCircRNA-176"; exon_number "2" gene_name "Stxbp5l"; gene_biotype "protein_coding"; oId "ce:circStxbp5l-484-001"; tissue "ce";
11	ncSplice	exon	69554172	69554212	.	+	.	gene_id "ENSRNOG00000002496"; transcript_id "rnCircRNA-176"; exon_number "3" gene_name "Stxbp5l"; gene_biotype "protein_coding"; oId "ce:circStxbp5l-484-001"; tissue "ce";
11	ncSplice	exon	69556307	69556524	.	+	.	gene_id "ENSRNOG00000002496"; transcript_id "rnCircRNA-176"; exon_number "4" gene_name "Stxbp5l"; gene_biotype "protein_coding"; oId "ce:circStxbp5l-484-001"; tissue "ce";
11	ncSplice	exon	69559808	69559980	.	+	.	gene_id "ENSRNOG00000002496"; transcript_id "rnCircRNA-176"; exon_number "5" gene_name "Stxbp5l"; gene_biotype "protein_coding"; oId "ce:circStxbp5l-484-001"; tissue "ce";
11	ncSplice	exon	69568682	69568807	.	+	.	gene_id "ENSRNOG00000002496"; transcript_id "rnCircRNA-176"; exon_number "6" gene_name "Stxbp5l"; gene_biotype "protein_coding"; oId "ce:circStxbp5l-484-001"; tissue "ce";
1	ncSplice	gene	170228400	170267697	.	-	.	gene_id "ENSRNOG00000016206"; gene_name "Uvrag"; gene_source "ncSplice"; gene_biotype "protein_coding";
1	ncSplice	transcript	170228400	170267697	.	-	.	gene_id "ENSRNOG00000016206"; transcript_id "rnCircRNA-177"; gene_name "Uvrag"; gene_biotype "protein_coding"; transcript_biotype "circRNA"; oId "ce:circUvrag-496-001"; tissue "ce";
1	ncSplice	exon	170228400	170228482	.	-	.	gene_id "ENSRNOG00000016206"; transcript_id "rnCircRNA-177"; exon_number "1" gene_name "Uvrag"; gene_biotype "protein_coding"; oId "ce:circUvrag-496-001"; tissue "ce";
1	ncSplice	exon	170248984	170249058	.	-	.	gene_id "ENSRNOG00000016206"; transcript_id "rnCircRNA-177"; exon_number "2" gene_name "Uvrag"; gene_biotype "protein_coding"; oId "ce:circUvrag-496-001"; tissue "ce";
1	ncSplice	exon	170258176	170258337	.	-	.	gene_id "ENSRNOG00000016206"; transcript_id "rnCircRNA-177"; exon_number "3" gene_name "Uvrag"; gene_biotype "protein_coding"; oId "ce:circUvrag-496-001"; tissue "ce";
1	ncSplice	exon	170267663	170267697	.	-	.	gene_id "ENSRNOG00000016206"; transcript_id "rnCircRNA-177"; exon_number "4" gene_name "Uvrag"; gene_biotype "protein_coding"; oId "ce:circUvrag-496-001"; tissue "ce";
1	ncSplice	gene	17036630	17043009	.	+	.	gene_id "ENSRNOG00000031700"; gene_name "Map3k5"; gene_source "ncSplice"; gene_biotype "protein_coding";
1	ncSplice	transcript	17036630	17043009	.	+	.	gene_id "ENSRNOG00000031700"; transcript_id "rnCircRNA-178"; gene_name "Map3k5"; gene_biotype "protein_coding"; transcript_biotype "circRNA"; oId "ce:circMap3k5-501-001"; tissue "ce";
1	ncSplice	exon	17036630	17036823	.	+	.	gene_id "ENSRNOG00000031700"; transcript_id "rnCircRNA-178"; exon_number "1" gene_name "Map3k5"; gene_biotype "protein_coding"; oId "ce:circMap3k5-501-001"; tissue "ce";
1	ncSplice	exon	17038409	17038577	.	+	.	gene_id "ENSRNOG00000031700"; transcript_id "rnCircRNA-178"; exon_number "2" gene_name "Map3k5"; gene_biotype "protein_coding"; oId "ce:circMap3k5-501-001"; tissue "ce";
1	ncSplice	exon	17040043	17040149	.	+	.	gene_id "ENSRNOG00000031700"; transcript_id "rnCircRNA-178"; exon_number "3" gene_name "Map3k5"; gene_biotype "protein_coding"; oId "ce:circMap3k5-501-001"; tissue "ce";
1	ncSplice	exon	17042839	17043009	.	+	.	gene_id "ENSRNOG00000031700"; transcript_id "rnCircRNA-178"; exon_number "4" gene_name "Map3k5"; gene_biotype "protein_coding"; oId "ce:circMap3k5-501-001"; tissue "ce";
1	ncSplice	gene	171847507	171855556	.	+	.	gene_id "ENSRNOG00000018176"; gene_name "Rab6a"; gene_source "ncSplice"; gene_biotype "protein_coding";
1	ncSplice	transcript	171847507	171855556	.	+	.	gene_id "ENSRNOG00000018176"; transcript_id "rnCircRNA-179"; gene_name "Rab6a"; gene_biotype "protein_coding"; transcript_biotype "circRNA"; oId "ce:circRab6a-516-001"; tissue "ce";
1	ncSplice	exon	171847507	171847565	.	+	.	gene_id "ENSRNOG00000018176"; transcript_id "rnCircRNA-179"; exon_number "1" gene_name "Rab6a"; gene_biotype "protein_coding"; oId "ce:circRab6a-516-001"; tissue "ce";
1	ncSplice	exon	171849077	171850629	.	+	.	gene_id "ENSRNOG00000018176"; transcript_id "rnCircRNA-179"; exon_number "2" gene_name "Rab6a"; gene_biotype "protein_coding"; oId "ce:circRab6a-516-001"; tissue "ce";
1	ncSplice	exon	171852561	171855556	.	+	.	gene_id "ENSRNOG00000018176"; transcript_id "rnCircRNA-179"; exon_number "3" gene_name "Rab6a"; gene_biotype "protein_coding"; oId "ce:circRab6a-516-001"; tissue "ce";
11	ncSplice	gene	73219936	73245727	.	-	.	gene_id "ENSRNOG00000001795"; gene_name "Itgb5"; gene_source "ncSplice"; gene_biotype "processed_transcript";
11	ncSplice	transcript	73219936	73245727	.	-	.	gene_id "ENSRNOG00000001795"; transcript_id "rnCircRNA-180"; gene_name "Itgb5"; gene_biotype "processed_transcript"; transcript_biotype "circRNA"; oId "ce:circItgb5-522-001"; tissue "ce";
11	ncSplice	exon	73219936	73220153	.	-	.	gene_id "ENSRNOG00000001795"; transcript_id "rnCircRNA-180"; exon_number "1" gene_name "Itgb5"; gene_biotype "processed_transcript"; oId "ce:circItgb5-522-001"; tissue "ce";
11	ncSplice	exon	73220155	73220186	.	-	.	gene_id "ENSRNOG00000001795"; transcript_id "rnCircRNA-180"; exon_number "2" gene_name "Itgb5"; gene_biotype "processed_transcript"; oId "ce:circItgb5-522-001"; tissue "ce";
11	ncSplice	exon	73229435	73229639	.	-	.	gene_id "ENSRNOG00000001795"; transcript_id "rnCircRNA-180"; exon_number "3" gene_name "Itgb5"; gene_biotype "processed_transcript"; oId "ce:circItgb5-522-001"; tissue "ce";
11	ncSplice	exon	73245642	73245727	.	-	.	gene_id "ENSRNOG00000001795"; transcript_id "rnCircRNA-180"; exon_number "4" gene_name "Itgb5"; gene_biotype "processed_transcript"; oId "ce:circItgb5-522-001"; tissue "ce";
11	ncSplice	gene	73657573	73672241	.	-	.	gene_id "ENSRNOG00000001789"; gene_name "Zfp148"; gene_source "ncSplice"; gene_biotype "protein_coding";
11	ncSplice	transcript	73657573	73672241	.	-	.	gene_id "ENSRNOG00000001789"; transcript_id "rnCircRNA-181"; gene_name "Zfp148"; gene_biotype "protein_coding"; transcript_biotype "circRNA"; oId "ce:circZfp148-533-001"; tissue "ce";
11	ncSplice	exon	73657573	73657921	.	-	.	gene_id "ENSRNOG00000001789"; transcript_id "rnCircRNA-181"; exon_number "1" gene_name "Zfp148"; gene_biotype "protein_coding"; oId "ce:circZfp148-533-001"; tissue "ce";
11	ncSplice	exon	73665336	73665472	.	-	.	gene_id "ENSRNOG00000001789"; transcript_id "rnCircRNA-181"; exon_number "2" gene_name "Zfp148"; gene_biotype "protein_coding"; oId "ce:circZfp148-533-001"; tissue "ce";
11	ncSplice	exon	73672160	73672241	.	-	.	gene_id "ENSRNOG00000001789"; transcript_id "rnCircRNA-181"; exon_number "3" gene_name "Zfp148"; gene_biotype "protein_coding"; oId "ce:circZfp148-533-001"; tissue "ce";
11	ncSplice	gene	74141647	74159524	.	-	.	gene_id "ENSRNOG00000001774"; gene_name "Lrch3"; gene_source "ncSplice"; gene_biotype "protein_coding";
11	ncSplice	transcript	74141647	74159524	.	-	.	gene_id "ENSRNOG00000001774"; transcript_id "rnCircRNA-182"; gene_name "Lrch3"; gene_biotype "protein_coding"; transcript_biotype "circRNA"; oId "ce:circLrch3-539-001|ts:circLrch3-928-001"; tissue "ce|ts";
11	ncSplice	exon	74141647	74141756	.	-	.	gene_id "ENSRNOG00000001774"; transcript_id "rnCircRNA-182"; exon_number "1" gene_name "Lrch3"; gene_biotype "protein_coding"; oId "ce:circLrch3-539-001|ts:circLrch3-928-001"; tissue "ce|ts";
11	ncSplice	exon	74143908	74144044	.	-	.	gene_id "ENSRNOG00000001774"; transcript_id "rnCircRNA-182"; exon_number "2" gene_name "Lrch3"; gene_biotype "protein_coding"; oId "ce:circLrch3-539-001|ts:circLrch3-928-001"; tissue "ce|ts";
11	ncSplice	exon	74154652	74154757	.	-	.	gene_id "ENSRNOG00000001774"; transcript_id "rnCircRNA-182"; exon_number "3" gene_name "Lrch3"; gene_biotype "protein_coding"; oId "ce:circLrch3-539-001|ts:circLrch3-928-001"; tissue "ce|ts";
11	ncSplice	exon	74157706	74157832	.	-	.	gene_id "ENSRNOG00000001774"; transcript_id "rnCircRNA-182"; exon_number "4" gene_name "Lrch3"; gene_biotype "protein_coding"; oId "ce:circLrch3-539-001|ts:circLrch3-928-001"; tissue "ce|ts";
11	ncSplice	exon	74159380	74159524	.	-	.	gene_id "ENSRNOG00000001774"; transcript_id "rnCircRNA-182"; exon_number "5" gene_name "Lrch3"; gene_biotype "protein_coding"; oId "ce:circLrch3-539-001|ts:circLrch3-928-001"; tissue "ce|ts";
11	ncSplice	gene	75319930	75389573	.	-	.	gene_id "ENSRNOG00000038597"; gene_name "Dlg1"; gene_source "ncSplice"; gene_biotype "protein_coding";
11	ncSplice	transcript	75319930	75389573	.	-	.	gene_id "ENSRNOG00000038597"; transcript_id "rnCircRNA-183"; gene_name "Dlg1"; gene_biotype "protein_coding"; transcript_biotype "circRNA"; oId "ce:circDlg1-548-001"; tissue "ce";
11	ncSplice	exon	75319930	75320074	.	-	.	gene_id "ENSRNOG00000038597"; transcript_id "rnCircRNA-183"; exon_number "1" gene_name "Dlg1"; gene_biotype "protein_coding"; oId "ce:circDlg1-548-001"; tissue "ce";
11	ncSplice	exon	75323166	75323302	.	-	.	gene_id "ENSRNOG00000038597"; transcript_id "rnCircRNA-183"; exon_number "2" gene_name "Dlg1"; gene_biotype "protein_coding"; oId "ce:circDlg1-548-001"; tissue "ce";
11	ncSplice	exon	75325029	75325075	.	-	.	gene_id "ENSRNOG00000038597"; transcript_id "rnCircRNA-183"; exon_number "3" gene_name "Dlg1"; gene_biotype "protein_coding"; oId "ce:circDlg1-548-001"; tissue "ce";
11	ncSplice	exon	75325078	75325198	.	-	.	gene_id "ENSRNOG00000038597"; transcript_id "rnCircRNA-183"; exon_number "4" gene_name "Dlg1"; gene_biotype "protein_coding"; oId "ce:circDlg1-548-001"; tissue "ce";
11	ncSplice	exon	75326916	75327040	.	-	.	gene_id "ENSRNOG00000038597"; transcript_id "rnCircRNA-183"; exon_number "5" gene_name "Dlg1"; gene_biotype "protein_coding"; oId "ce:circDlg1-548-001"; tissue "ce";
11	ncSplice	exon	75329428	75329478	.	-	.	gene_id "ENSRNOG00000038597"; transcript_id "rnCircRNA-183"; exon_number "6" gene_name "Dlg1"; gene_biotype "protein_coding"; oId "ce:circDlg1-548-001"; tissue "ce";
11	ncSplice	exon	75339054	75339107	.	-	.	gene_id "ENSRNOG00000038597"; transcript_id "rnCircRNA-183"; exon_number "7" gene_name "Dlg1"; gene_biotype "protein_coding"; oId "ce:circDlg1-548-001"; tissue "ce";
11	ncSplice	exon	75349311	75349409	.	-	.	gene_id "ENSRNOG00000038597"; transcript_id "rnCircRNA-183"; exon_number "8" gene_name "Dlg1"; gene_biotype "protein_coding"; oId "ce:circDlg1-548-001"; tissue "ce";
11	ncSplice	exon	75389409	75389573	.	-	.	gene_id "ENSRNOG00000038597"; transcript_id "rnCircRNA-183"; exon_number "9" gene_name "Dlg1"; gene_biotype "protein_coding"; oId "ce:circDlg1-548-001"; tissue "ce";
11	ncSplice	gene	77806053	77833367	.	-	.	gene_id "ENSRNOG00000001717"; gene_name "Opa1"; gene_source "ncSplice"; gene_biotype "protein_coding";
11	ncSplice	transcript	77806053	77833367	.	-	.	gene_id "ENSRNOG00000001717"; transcript_id "rnCircRNA-184"; gene_name "Opa1"; gene_biotype "protein_coding"; transcript_biotype "circRNA"; oId "ce:circOpa1-555-002"; tissue "ce";
11	ncSplice	exon	77806053	77806183	.	-	.	gene_id "ENSRNOG00000001717"; transcript_id "rnCircRNA-184"; exon_number "1" gene_name "Opa1"; gene_biotype "protein_coding"; oId "ce:circOpa1-555-002"; tissue "ce";
11	ncSplice	exon	77806439	77806538	.	-	.	gene_id "ENSRNOG00000001717"; transcript_id "rnCircRNA-184"; exon_number "2" gene_name "Opa1"; gene_biotype "protein_coding"; oId "ce:circOpa1-555-002"; tissue "ce";
11	ncSplice	exon	77806618	77806689	.	-	.	gene_id "ENSRNOG00000001717"; transcript_id "rnCircRNA-184"; exon_number "3" gene_name "Opa1"; gene_biotype "protein_coding"; oId "ce:circOpa1-555-002"; tissue "ce";
11	ncSplice	exon	77807166	77807240	.	-	.	gene_id "ENSRNOG00000001717"; transcript_id "rnCircRNA-184"; exon_number "4" gene_name "Opa1"; gene_biotype "protein_coding"; oId "ce:circOpa1-555-002"; tissue "ce";
11	ncSplice	exon	77807347	77807427	.	-	.	gene_id "ENSRNOG00000001717"; transcript_id "rnCircRNA-184"; exon_number "5" gene_name "Opa1"; gene_biotype "protein_coding"; oId "ce:circOpa1-555-002"; tissue "ce";
11	ncSplice	exon	77811301	77811414	.	-	.	gene_id "ENSRNOG00000001717"; transcript_id "rnCircRNA-184"; exon_number "6" gene_name "Opa1"; gene_biotype "protein_coding"; oId "ce:circOpa1-555-002"; tissue "ce";
11	ncSplice	exon	77812002	77812088	.	-	.	gene_id "ENSRNOG00000001717"; transcript_id "rnCircRNA-184"; exon_number "7" gene_name "Opa1"; gene_biotype "protein_coding"; oId "ce:circOpa1-555-002"; tissue "ce";
11	ncSplice	exon	77815841	77815945	.	-	.	gene_id "ENSRNOG00000001717"; transcript_id "rnCircRNA-184"; exon_number "8" gene_name "Opa1"; gene_biotype "protein_coding"; oId "ce:circOpa1-555-002"; tissue "ce";
11	ncSplice	exon	77819335	77819388	.	-	.	gene_id "ENSRNOG00000001717"; transcript_id "rnCircRNA-184"; exon_number "9" gene_name "Opa1"; gene_biotype "protein_coding"; oId "ce:circOpa1-555-002"; tissue "ce";
11	ncSplice	exon	77831917	77831984	.	-	.	gene_id "ENSRNOG00000001717"; transcript_id "rnCircRNA-184"; exon_number "10" gene_name "Opa1"; gene_biotype "protein_coding"; oId "ce:circOpa1-555-002"; tissue "ce";
11	ncSplice	exon	77833260	77833367	.	-	.	gene_id "ENSRNOG00000001717"; transcript_id "rnCircRNA-184"; exon_number "11" gene_name "Opa1"; gene_biotype "protein_coding"; oId "ce:circOpa1-555-002"; tissue "ce";
1	ncSplice	gene	178714246	178718872	.	+	.	gene_id "ENSRNOG00000019613"; gene_name "Syt9"; gene_source "ncSplice"; gene_biotype "protein_coding";
1	ncSplice	transcript	178714246	178718872	.	+	.	gene_id "ENSRNOG00000019613"; transcript_id "rnCircRNA-185"; gene_name "Syt9"; gene_biotype "protein_coding"; transcript_biotype "circRNA"; oId "ce:circSyt9-556-001"; tissue "ce";
1	ncSplice	exon	178714246	178714366	.	+	.	gene_id "ENSRNOG00000019613"; transcript_id "rnCircRNA-185"; exon_number "1" gene_name "Syt9"; gene_biotype "protein_coding"; oId "ce:circSyt9-556-001"; tissue "ce";
1	ncSplice	exon	178716394	178716565	.	+	.	gene_id "ENSRNOG00000019613"; transcript_id "rnCircRNA-185"; exon_number "2" gene_name "Syt9"; gene_biotype "protein_coding"; oId "ce:circSyt9-556-001"; tissue "ce";
1	ncSplice	exon	178718743	178718872	.	+	.	gene_id "ENSRNOG00000019613"; transcript_id "rnCircRNA-185"; exon_number "3" gene_name "Syt9"; gene_biotype "protein_coding"; oId "ce:circSyt9-556-001"; tissue "ce";
11	ncSplice	gene	83941145	83953519	.	+	.	gene_id "ENSRNOG00000001930"; gene_name "Ccdc50"; gene_source "ncSplice"; gene_biotype "protein_coding";
11	ncSplice	transcript	83941145	83953519	.	+	.	gene_id "ENSRNOG00000001930"; transcript_id "rnCircRNA-186"; gene_name "Ccdc50"; gene_biotype "protein_coding"; transcript_biotype "circRNA"; oId "ce:circCcdc50-572-001|ts:circCcdc50-999-001"; tissue "ce|ts";
11	ncSplice	exon	83941145	83941235	.	+	.	gene_id "ENSRNOG00000001930"; transcript_id "rnCircRNA-186"; exon_number "1" gene_name "Ccdc50"; gene_biotype "protein_coding"; oId "ce:circCcdc50-572-001|ts:circCcdc50-999-001"; tissue "ce|ts";
11	ncSplice	exon	83953402	83953519	.	+	.	gene_id "ENSRNOG00000001930"; transcript_id "rnCircRNA-186"; exon_number "2" gene_name "Ccdc50"; gene_biotype "protein_coding"; oId "ce:circCcdc50-572-001|ts:circCcdc50-999-001"; tissue "ce|ts";
11	ncSplice	gene	87011893	87012927	.	-	.	gene_id "ENSRNOG00000001719"; gene_name "Psmd2"; gene_source "ncSplice"; gene_biotype "protein_coding";
11	ncSplice	transcript	87011893	87012927	.	-	.	gene_id "ENSRNOG00000001719"; transcript_id "rnCircRNA-187"; gene_name "Psmd2"; gene_biotype "protein_coding"; transcript_biotype "circRNA"; oId "ce:circPsmd2-576-001|ts:circPsmd2-1013-001"; tissue "ce|ts";
11	ncSplice	exon	87011893	87012020	.	-	.	gene_id "ENSRNOG00000001719"; transcript_id "rnCircRNA-187"; exon_number "1" gene_name "Psmd2"; gene_biotype "protein_coding"; oId "ce:circPsmd2-576-001|ts:circPsmd2-1013-001"; tissue "ce|ts";
11	ncSplice	exon	87012540	87012646	.	-	.	gene_id "ENSRNOG00000001719"; transcript_id "rnCircRNA-187"; exon_number "2" gene_name "Psmd2"; gene_biotype "protein_coding"; oId "ce:circPsmd2-576-001|ts:circPsmd2-1013-001"; tissue "ce|ts";
11	ncSplice	exon	87012781	87012927	.	-	.	gene_id "ENSRNOG00000001719"; transcript_id "rnCircRNA-187"; exon_number "3" gene_name "Psmd2"; gene_biotype "protein_coding"; oId "ce:circPsmd2-576-001|ts:circPsmd2-1013-001"; tissue "ce|ts";
1	ncSplice	gene	190980255	190989897	.	+	.	gene_id "ENSRNOG00000011417"; gene_name "Pde3b"; gene_source "ncSplice"; gene_biotype "protein_coding";
1	ncSplice	transcript	190980255	190989897	.	+	.	gene_id "ENSRNOG00000011417"; transcript_id "rnCircRNA-188"; gene_name "Pde3b"; gene_biotype "protein_coding"; transcript_biotype "circRNA"; oId "ce:circPde3b-598-001|ts:circPde3b-1032-001"; tissue "ce|ts";
1	ncSplice	exon	190980255	190980305	.	+	.	gene_id "ENSRNOG00000011417"; transcript_id "rnCircRNA-188"; exon_number "1" gene_name "Pde3b"; gene_biotype "protein_coding"; oId "ce:circPde3b-598-001|ts:circPde3b-1032-001"; tissue "ce|ts";
1	ncSplice	exon	190982367	190982615	.	+	.	gene_id "ENSRNOG00000011417"; transcript_id "rnCircRNA-188"; exon_number "2" gene_name "Pde3b"; gene_biotype "protein_coding"; oId "ce:circPde3b-598-001|ts:circPde3b-1032-001"; tissue "ce|ts";
1	ncSplice	exon	190985317	190985456	.	+	.	gene_id "ENSRNOG00000011417"; transcript_id "rnCircRNA-188"; exon_number "3" gene_name "Pde3b"; gene_biotype "protein_coding"; oId "ce:circPde3b-598-001|ts:circPde3b-1032-001"; tissue "ce|ts";
1	ncSplice	exon	190989791	190989897	.	+	.	gene_id "ENSRNOG00000011417"; transcript_id "rnCircRNA-188"; exon_number "4" gene_name "Pde3b"; gene_biotype "protein_coding"; oId "ce:circPde3b-598-001|ts:circPde3b-1032-001"; tissue "ce|ts";
1	ncSplice	gene	191013900	191033310	.	+	.	gene_id "ENSRNOG00000011417"; gene_name "Pde3b"; gene_source "ncSplice"; gene_biotype "protein_coding";
1	ncSplice	transcript	191013900	191033310	.	+	.	gene_id "ENSRNOG00000011417"; transcript_id "rnCircRNA-189"; gene_name "Pde3b"; gene_biotype "protein_coding"; transcript_biotype "circRNA"; oId "ce:circPde3b-603-001|ts:circPde3b-1037-015"; tissue "ce|ts";
1	ncSplice	exon	191013900	191014110	.	+	.	gene_id "ENSRNOG00000011417"; transcript_id "rnCircRNA-189"; exon_number "1" gene_name "Pde3b"; gene_biotype "protein_coding"; oId "ce:circPde3b-603-001|ts:circPde3b-1037-015"; tissue "ce|ts";
1	ncSplice	exon	191014778	191014851	.	+	.	gene_id "ENSRNOG00000011417"; transcript_id "rnCircRNA-189"; exon_number "2" gene_name "Pde3b"; gene_biotype "protein_coding"; oId "ce:circPde3b-603-001|ts:circPde3b-1037-015"; tissue "ce|ts";
1	ncSplice	exon	191022535	191022674	.	+	.	gene_id "ENSRNOG00000011417"; transcript_id "rnCircRNA-189"; exon_number "3" gene_name "Pde3b"; gene_biotype "protein_coding"; oId "ce:circPde3b-603-001|ts:circPde3b-1037-015"; tissue "ce|ts";
1	ncSplice	exon	191023723	191023860	.	+	.	gene_id "ENSRNOG00000011417"; transcript_id "rnCircRNA-189"; exon_number "4" gene_name "Pde3b"; gene_biotype "protein_coding"; oId "ce:circPde3b-603-001|ts:circPde3b-1037-015"; tissue "ce|ts";
1	ncSplice	exon	191025828	191025939	.	+	.	gene_id "ENSRNOG00000011417"; transcript_id "rnCircRNA-189"; exon_number "5" gene_name "Pde3b"; gene_biotype "protein_coding"; oId "ce:circPde3b-603-001|ts:circPde3b-1037-015"; tissue "ce|ts";
1	ncSplice	exon	191027578	191027691	.	+	.	gene_id "ENSRNOG00000011417"; transcript_id "rnCircRNA-189"; exon_number "6" gene_name "Pde3b"; gene_biotype "protein_coding"; oId "ce:circPde3b-603-001|ts:circPde3b-1037-015"; tissue "ce|ts";
1	ncSplice	exon	191033111	191033310	.	+	.	gene_id "ENSRNOG00000011417"; transcript_id "rnCircRNA-189"; exon_number "7" gene_name "Pde3b"; gene_biotype "protein_coding"; oId "ce:circPde3b-603-001|ts:circPde3b-1037-015"; tissue "ce|ts";
11	ncSplice	gene	91778562	91818463	.	+	.	gene_id "ENSRNOG00000001818"; gene_name "Fgd4"; gene_source "ncSplice"; gene_biotype "protein_coding";
11	ncSplice	transcript	91778562	91818463	.	+	.	gene_id "ENSRNOG00000001818"; transcript_id "rnCircRNA-190"; gene_name "Fgd4"; gene_biotype "protein_coding"; transcript_biotype "circRNA"; oId "ce:circFgd4-606-001"; tissue "ce";
11	ncSplice	exon	91778562	91778681	.	+	.	gene_id "ENSRNOG00000001818"; transcript_id "rnCircRNA-190"; exon_number "1" gene_name "Fgd4"; gene_biotype "protein_coding"; oId "ce:circFgd4-606-001"; tissue "ce";
11	ncSplice	exon	91787913	91788096	.	+	.	gene_id "ENSRNOG00000001818"; transcript_id "rnCircRNA-190"; exon_number "2" gene_name "Fgd4"; gene_biotype "protein_coding"; oId "ce:circFgd4-606-001"; tissue "ce";
11	ncSplice	exon	91797677	91798184	.	+	.	gene_id "ENSRNOG00000001818"; transcript_id "rnCircRNA-190"; exon_number "3" gene_name "Fgd4"; gene_biotype "protein_coding"; oId "ce:circFgd4-606-001"; tissue "ce";
11	ncSplice	exon	91809212	91809301	.	+	.	gene_id "ENSRNOG00000001818"; transcript_id "rnCircRNA-190"; exon_number "4" gene_name "Fgd4"; gene_biotype "protein_coding"; oId "ce:circFgd4-606-001"; tissue "ce";
11	ncSplice	exon	91811552	91811697	.	+	.	gene_id "ENSRNOG00000001818"; transcript_id "rnCircRNA-190"; exon_number "5" gene_name "Fgd4"; gene_biotype "protein_coding"; oId "ce:circFgd4-606-001"; tissue "ce";
11	ncSplice	exon	91812105	91812261	.	+	.	gene_id "ENSRNOG00000001818"; transcript_id "rnCircRNA-190"; exon_number "6" gene_name "Fgd4"; gene_biotype "protein_coding"; oId "ce:circFgd4-606-001"; tissue "ce";
11	ncSplice	exon	91814912	91815050	.	+	.	gene_id "ENSRNOG00000001818"; transcript_id "rnCircRNA-190"; exon_number "7" gene_name "Fgd4"; gene_biotype "protein_coding"; oId "ce:circFgd4-606-001"; tissue "ce";
11	ncSplice	exon	91817975	91818033	.	+	.	gene_id "ENSRNOG00000001818"; transcript_id "rnCircRNA-190"; exon_number "8" gene_name "Fgd4"; gene_biotype "protein_coding"; oId "ce:circFgd4-606-001"; tissue "ce";
11	ncSplice	exon	91818317	91818463	.	+	.	gene_id "ENSRNOG00000001818"; transcript_id "rnCircRNA-190"; exon_number "9" gene_name "Fgd4"; gene_biotype "protein_coding"; oId "ce:circFgd4-606-001"; tissue "ce";
1	ncSplice	gene	192235624	192239542	.	+	.	gene_id "ENSRNOG00000020479"; gene_name "Pik3c2a"; gene_source "ncSplice"; gene_biotype "protein_coding";
1	ncSplice	transcript	192235624	192239542	.	+	.	gene_id "ENSRNOG00000020479"; transcript_id "rnCircRNA-191"; gene_name "Pik3c2a"; gene_biotype "protein_coding"; transcript_biotype "circRNA"; oId "ce:circPik3c2a-612-001|ts:circPik3c2a-1061-001"; tissue "ce|ts";
1	ncSplice	exon	192235624	192235744	.	+	.	gene_id "ENSRNOG00000020479"; transcript_id "rnCircRNA-191"; exon_number "1" gene_name "Pik3c2a"; gene_biotype "protein_coding"; oId "ce:circPik3c2a-612-001|ts:circPik3c2a-1061-001"; tissue "ce|ts";
1	ncSplice	exon	192236571	192236682	.	+	.	gene_id "ENSRNOG00000020479"; transcript_id "rnCircRNA-191"; exon_number "2" gene_name "Pik3c2a"; gene_biotype "protein_coding"; oId "ce:circPik3c2a-612-001|ts:circPik3c2a-1061-001"; tissue "ce|ts";
1	ncSplice	exon	192239272	192239351	.	+	.	gene_id "ENSRNOG00000020479"; transcript_id "rnCircRNA-191"; exon_number "3" gene_name "Pik3c2a"; gene_biotype "protein_coding"; oId "ce:circPik3c2a-612-001|ts:circPik3c2a-1061-001"; tissue "ce|ts";
1	ncSplice	exon	192239479	192239542	.	+	.	gene_id "ENSRNOG00000020479"; transcript_id "rnCircRNA-191"; exon_number "4" gene_name "Pik3c2a"; gene_biotype "protein_coding"; oId "ce:circPik3c2a-612-001|ts:circPik3c2a-1061-001"; tissue "ce|ts";
1	ncSplice	gene	192277124	192278258	.	+	.	gene_id "ENSRNOG00000020479"; gene_name "Pik3c2a"; gene_source "ncSplice"; gene_biotype "protein_coding";
1	ncSplice	transcript	192277124	192278258	.	+	.	gene_id "ENSRNOG00000020479"; transcript_id "rnCircRNA-192"; gene_name "Pik3c2a"; gene_biotype "protein_coding"; transcript_biotype "circRNA"; oId "ce:circPik3c2a-616-001|ts:circPik3c2a-1064-001"; tissue "ce|ts";
1	ncSplice	exon	192277124	192277228	.	+	.	gene_id "ENSRNOG00000020479"; transcript_id "rnCircRNA-192"; exon_number "1" gene_name "Pik3c2a"; gene_biotype "protein_coding"; oId "ce:circPik3c2a-616-001|ts:circPik3c2a-1064-001"; tissue "ce|ts";
1	ncSplice	exon	192278166	192278258	.	+	.	gene_id "ENSRNOG00000020479"; transcript_id "rnCircRNA-192"; exon_number "2" gene_name "Pik3c2a"; gene_biotype "protein_coding"; oId "ce:circPik3c2a-616-001|ts:circPik3c2a-1064-001"; tissue "ce|ts";
1	ncSplice	gene	197907157	197917342	.	+	.	gene_id "ENSRNOG00000025940"; gene_name "LOC100362944"; gene_source "ncSplice"; gene_biotype "protein_coding";
1	ncSplice	transcript	197907157	197917342	.	+	.	gene_id "ENSRNOG00000025940"; transcript_id "rnCircRNA-193"; gene_name "LOC100362944"; gene_biotype "protein_coding"; transcript_biotype "circRNA"; oId "ce:circLOC100362944-630-001"; tissue "ce";
1	ncSplice	exon	197907157	197907347	.	+	.	gene_id "ENSRNOG00000025940"; transcript_id "rnCircRNA-193"; exon_number "1" gene_name "LOC100362944"; gene_biotype "protein_coding"; oId "ce:circLOC100362944-630-001"; tissue "ce";
1	ncSplice	exon	197911442	197911651	.	+	.	gene_id "ENSRNOG00000025940"; transcript_id "rnCircRNA-193"; exon_number "2" gene_name "LOC100362944"; gene_biotype "protein_coding"; oId "ce:circLOC100362944-630-001"; tissue "ce";
1	ncSplice	exon	197917158	197917342	.	+	.	gene_id "ENSRNOG00000025940"; transcript_id "rnCircRNA-193"; exon_number "3" gene_name "LOC100362944"; gene_biotype "protein_coding"; oId "ce:circLOC100362944-630-001"; tissue "ce";
1	ncSplice	gene	199443931	199473537	.	+	.	gene_id "ENSRNOG00000012061"; gene_name "Prkcb"; gene_source "ncSplice"; gene_biotype "protein_coding";
1	ncSplice	transcript	199443931	199473537	.	+	.	gene_id "ENSRNOG00000012061"; transcript_id "rnCircRNA-194"; gene_name "Prkcb"; gene_biotype "protein_coding"; transcript_biotype "circRNA"; oId "ce:circPrkcb-634-001"; tissue "ce";
1	ncSplice	exon	199443931	199444013	.	+	.	gene_id "ENSRNOG00000012061"; transcript_id "rnCircRNA-194"; exon_number "1" gene_name "Prkcb"; gene_biotype "protein_coding"; oId "ce:circPrkcb-634-001"; tissue "ce";
1	ncSplice	exon	199472565	199472676	.	+	.	gene_id "ENSRNOG00000012061"; transcript_id "rnCircRNA-194"; exon_number "2" gene_name "Prkcb"; gene_biotype "protein_coding"; oId "ce:circPrkcb-634-001"; tissue "ce";
1	ncSplice	exon	199473409	199473537	.	+	.	gene_id "ENSRNOG00000012061"; transcript_id "rnCircRNA-194"; exon_number "3" gene_name "Prkcb"; gene_biotype "protein_coding"; oId "ce:circPrkcb-634-001"; tissue "ce";
1	ncSplice	gene	201897852	201974729	.	-	.	gene_id "1:201897851:201974729:-1"; gene_name "1:201897851:201974729:-1"; gene_source "ncSplice"; gene_biotype "novel";
1	ncSplice	transcript	201897852	201974729	.	-	.	gene_id "1:201897851:201974729:-1"; transcript_id "rnCircRNA-195"; gene_name "1:201897851:201974729:-1"; gene_biotype "novel"; transcript_biotype "circRNA"; oId "ce:circ1:201897851:201974729:-1-642-001"; tissue "ce";
1	ncSplice	exon	201897852	201908431	.	-	.	gene_id "1:201897851:201974729:-1"; transcript_id "rnCircRNA-195"; exon_number "1" gene_name "1:201897851:201974729:-1"; gene_biotype "novel"; oId "ce:circ1:201897851:201974729:-1-642-001"; tissue "ce";
1	ncSplice	exon	201941024	201963886	.	-	.	gene_id "1:201897851:201974729:-1"; transcript_id "rnCircRNA-195"; exon_number "2" gene_name "1:201897851:201974729:-1"; gene_biotype "novel"; oId "ce:circ1:201897851:201974729:-1-642-001"; tissue "ce";
1	ncSplice	exon	201970920	201974729	.	-	.	gene_id "1:201897851:201974729:-1"; transcript_id "rnCircRNA-195"; exon_number "3" gene_name "1:201897851:201974729:-1"; gene_biotype "novel"; oId "ce:circ1:201897851:201974729:-1-642-001"; tissue "ce";
1	ncSplice	gene	201899048	201983703	.	-	.	gene_id "1:201899047:201983703:-1"; gene_name "1:201899047:201983703:-1"; gene_source "ncSplice"; gene_biotype "novel";
1	ncSplice	transcript	201899048	201983703	.	-	.	gene_id "1:201899047:201983703:-1"; transcript_id "rnCircRNA-196"; gene_name "1:201899047:201983703:-1"; gene_biotype "novel"; transcript_biotype "circRNA"; oId "ce:circ1:201899047:201983703:-1-643-001"; tissue "ce";
1	ncSplice	exon	201899048	201908431	.	-	.	gene_id "1:201899047:201983703:-1"; transcript_id "rnCircRNA-196"; exon_number "1" gene_name "1:201899047:201983703:-1"; gene_biotype "novel"; oId "ce:circ1:201899047:201983703:-1-643-001"; tissue "ce";
1	ncSplice	exon	201941024	201963886	.	-	.	gene_id "1:201899047:201983703:-1"; transcript_id "rnCircRNA-196"; exon_number "2" gene_name "1:201899047:201983703:-1"; gene_biotype "novel"; oId "ce:circ1:201899047:201983703:-1-643-001"; tissue "ce";
1	ncSplice	exon	201970920	201983703	.	-	.	gene_id "1:201899047:201983703:-1"; transcript_id "rnCircRNA-196"; exon_number "3" gene_name "1:201899047:201983703:-1"; gene_biotype "novel"; oId "ce:circ1:201899047:201983703:-1-643-001"; tissue "ce";
1	ncSplice	gene	201908193	201969926	.	-	.	gene_id "1:201908192:201969926:-1"; gene_name "1:201908192:201969926:-1"; gene_source "ncSplice"; gene_biotype "novel";
1	ncSplice	transcript	201908193	201969926	.	-	.	gene_id "1:201908192:201969926:-1"; transcript_id "rnCircRNA-197"; gene_name "1:201908192:201969926:-1"; gene_biotype "novel"; transcript_biotype "circRNA"; oId "ce:circ1:201908192:201969926:-1-646-001"; tissue "ce";
1	ncSplice	exon	201908193	201908431	.	-	.	gene_id "1:201908192:201969926:-1"; transcript_id "rnCircRNA-197"; exon_number "1" gene_name "1:201908192:201969926:-1"; gene_biotype "novel"; oId "ce:circ1:201908192:201969926:-1-646-001"; tissue "ce";
1	ncSplice	exon	201941024	201963886	.	-	.	gene_id "1:201908192:201969926:-1"; transcript_id "rnCircRNA-197"; exon_number "2" gene_name "1:201908192:201969926:-1"; gene_biotype "novel"; oId "ce:circ1:201908192:201969926:-1-646-001"; tissue "ce";
1	ncSplice	exon	201968288	201969926	.	-	.	gene_id "1:201908192:201969926:-1"; transcript_id "rnCircRNA-197"; exon_number "3" gene_name "1:201908192:201969926:-1"; gene_biotype "novel"; oId "ce:circ1:201908192:201969926:-1-646-001"; tissue "ce";
1	ncSplice	gene	201963960	201973562	.	-	.	gene_id "1:201963959:201973562:-1"; gene_name "1:201963959:201973562:-1"; gene_source "ncSplice"; gene_biotype "novel";
1	ncSplice	transcript	201963960	201973562	.	-	.	gene_id "1:201963959:201973562:-1"; transcript_id "rnCircRNA-198"; gene_name "1:201963959:201973562:-1"; gene_biotype "novel"; transcript_biotype "circRNA"; oId "ce:circ1:201963959:201973562:-1-647-001"; tissue "ce";
1	ncSplice	exon	201963960	201965671	.	-	.	gene_id "1:201963959:201973562:-1"; transcript_id "rnCircRNA-198"; exon_number "1" gene_name "1:201963959:201973562:-1"; gene_biotype "novel"; oId "ce:circ1:201963959:201973562:-1-647-001"; tissue "ce";
1	ncSplice	exon	201972706	201973562	.	-	.	gene_id "1:201963959:201973562:-1"; transcript_id "rnCircRNA-198"; exon_number "2" gene_name "1:201963959:201973562:-1"; gene_biotype "novel"; oId "ce:circ1:201963959:201973562:-1-647-001"; tissue "ce";
1	ncSplice	gene	202108816	202112906	.	-	.	gene_id "1:202108815:202112906:-1"; gene_name "1:202108815:202112906:-1"; gene_source "ncSplice"; gene_biotype "novel";
1	ncSplice	transcript	202108816	202112906	.	-	.	gene_id "1:202108815:202112906:-1"; transcript_id "rnCircRNA-199"; gene_name "1:202108815:202112906:-1"; gene_biotype "novel"; transcript_biotype "circRNA"; oId "ce:circ1:202108815:202112906:-1-649-001"; tissue "ce";
1	ncSplice	exon	202108816	202110061	.	-	.	gene_id "1:202108815:202112906:-1"; transcript_id "rnCircRNA-199"; exon_number "1" gene_name "1:202108815:202112906:-1"; gene_biotype "novel"; oId "ce:circ1:202108815:202112906:-1-649-001"; tissue "ce";
1	ncSplice	exon	202111361	202112906	.	-	.	gene_id "1:202108815:202112906:-1"; transcript_id "rnCircRNA-199"; exon_number "2" gene_name "1:202108815:202112906:-1"; gene_biotype "novel"; oId "ce:circ1:202108815:202112906:-1-649-001"; tissue "ce";
1	ncSplice	gene	205968508	205973210	.	+	.	gene_id "ENSRNOG00000018637"; gene_name "Srcap"; gene_source "ncSplice"; gene_biotype "protein_coding";
1	ncSplice	transcript	205968508	205973210	.	+	.	gene_id "ENSRNOG00000018637"; transcript_id "rnCircRNA-200"; gene_name "Srcap"; gene_biotype "protein_coding"; transcript_biotype "circRNA"; oId "ce:circSrcap-655-001"; tissue "ce";
1	ncSplice	exon	205968508	205968693	.	+	.	gene_id "ENSRNOG00000018637"; transcript_id "rnCircRNA-200"; exon_number "1" gene_name "Srcap"; gene_biotype "protein_coding"; oId "ce:circSrcap-655-001"; tissue "ce";
1	ncSplice	exon	205969146	205969286	.	+	.	gene_id "ENSRNOG00000018637"; transcript_id "rnCircRNA-200"; exon_number "2" gene_name "Srcap"; gene_biotype "protein_coding"; oId "ce:circSrcap-655-001"; tissue "ce";
1	ncSplice	exon	205972598	205972820	.	+	.	gene_id "ENSRNOG00000018637"; transcript_id "rnCircRNA-200"; exon_number "3" gene_name "Srcap"; gene_biotype "protein_coding"; oId "ce:circSrcap-655-001"; tissue "ce";
1	ncSplice	exon	205972936	205973210	.	+	.	gene_id "ENSRNOG00000018637"; transcript_id "rnCircRNA-200"; exon_number "4" gene_name "Srcap"; gene_biotype "protein_coding"; oId "ce:circSrcap-655-001"; tissue "ce";
1	ncSplice	gene	208475039	208483951	.	+	.	gene_id "ENSRNOG00000020497"; gene_name "Plekha1"; gene_source "ncSplice"; gene_biotype "protein_coding";
1	ncSplice	transcript	208475039	208483951	.	+	.	gene_id "ENSRNOG00000020497"; transcript_id "rnCircRNA-201"; gene_name "Plekha1"; gene_biotype "protein_coding"; transcript_biotype "circRNA"; oId "ce:circPlekha1-662-001"; tissue "ce";
1	ncSplice	exon	208475039	208475199	.	+	.	gene_id "ENSRNOG00000020497"; transcript_id "rnCircRNA-201"; exon_number "1" gene_name "Plekha1"; gene_biotype "protein_coding"; oId "ce:circPlekha1-662-001"; tissue "ce";
1	ncSplice	exon	208480876	208480932	.	+	.	gene_id "ENSRNOG00000020497"; transcript_id "rnCircRNA-201"; exon_number "2" gene_name "Plekha1"; gene_biotype "protein_coding"; oId "ce:circPlekha1-662-001"; tissue "ce";
1	ncSplice	exon	208483906	208483951	.	+	.	gene_id "ENSRNOG00000020497"; transcript_id "rnCircRNA-201"; exon_number "3" gene_name "Plekha1"; gene_biotype "protein_coding"; oId "ce:circPlekha1-662-001"; tissue "ce";
1	ncSplice	gene	211263814	211272467	.	-	.	gene_id "ENSRNOG00000016267"; gene_name "Chst15"; gene_source "ncSplice"; gene_biotype "protein_coding";
1	ncSplice	transcript	211263814	211272467	.	-	.	gene_id "ENSRNOG00000016267"; transcript_id "rnCircRNA-202"; gene_name "Chst15"; gene_biotype "protein_coding"; transcript_biotype "circRNA"; oId "ce:circChst15-670-001"; tissue "ce";
1	ncSplice	exon	211263814	211263970	.	-	.	gene_id "ENSRNOG00000016267"; transcript_id "rnCircRNA-202"; exon_number "1" gene_name "Chst15"; gene_biotype "protein_coding"; oId "ce:circChst15-670-001"; tissue "ce";
1	ncSplice	exon	211268171	211268317	.	-	.	gene_id "ENSRNOG00000016267"; transcript_id "rnCircRNA-202"; exon_number "2" gene_name "Chst15"; gene_biotype "protein_coding"; oId "ce:circChst15-670-001"; tissue "ce";
1	ncSplice	exon	211270438	211270777	.	-	.	gene_id "ENSRNOG00000016267"; transcript_id "rnCircRNA-202"; exon_number "3" gene_name "Chst15"; gene_biotype "protein_coding"; oId "ce:circChst15-670-001"; tissue "ce";
1	ncSplice	exon	211271477	211272467	.	-	.	gene_id "ENSRNOG00000016267"; transcript_id "rnCircRNA-202"; exon_number "4" gene_name "Chst15"; gene_biotype "protein_coding"; oId "ce:circChst15-670-001"; tissue "ce";
12	ncSplice	gene	11392311	11416087	.	-	.	gene_id "ENSRNOG00000000942"; gene_name "Pan3"; gene_source "ncSplice"; gene_biotype "protein_coding";
12	ncSplice	transcript	11392311	11416087	.	-	.	gene_id "ENSRNOG00000000942"; transcript_id "rnCircRNA-203"; gene_name "Pan3"; gene_biotype "protein_coding"; transcript_biotype "circRNA"; oId "ce:circPan3-677-001"; tissue "ce";
12	ncSplice	exon	11392311	11392458	.	-	.	gene_id "ENSRNOG00000000942"; transcript_id "rnCircRNA-203"; exon_number "1" gene_name "Pan3"; gene_biotype "protein_coding"; oId "ce:circPan3-677-001"; tissue "ce";
12	ncSplice	exon	11415926	11416087	.	-	.	gene_id "ENSRNOG00000000942"; transcript_id "rnCircRNA-203"; exon_number "2" gene_name "Pan3"; gene_biotype "protein_coding"; oId "ce:circPan3-677-001"; tissue "ce";
12	ncSplice	gene	11392311	11432004	.	-	.	gene_id "ENSRNOG00000000942"; gene_name "Pan3"; gene_source "ncSplice"; gene_biotype "protein_coding";
12	ncSplice	transcript	11392311	11432004	.	-	.	gene_id "ENSRNOG00000000942"; transcript_id "rnCircRNA-204"; gene_name "Pan3"; gene_biotype "protein_coding"; transcript_biotype "circRNA"; oId "ce:circPan3-678-002"; tissue "ce";
12	ncSplice	exon	11392311	11392458	.	-	.	gene_id "ENSRNOG00000000942"; transcript_id "rnCircRNA-204"; exon_number "1" gene_name "Pan3"; gene_biotype "protein_coding"; oId "ce:circPan3-678-002"; tissue "ce";
12	ncSplice	exon	11428222	11428292	.	-	.	gene_id "ENSRNOG00000000942"; transcript_id "rnCircRNA-204"; exon_number "2" gene_name "Pan3"; gene_biotype "protein_coding"; oId "ce:circPan3-678-002"; tissue "ce";
12	ncSplice	exon	11429756	11429822	.	-	.	gene_id "ENSRNOG00000000942"; transcript_id "rnCircRNA-204"; exon_number "3" gene_name "Pan3"; gene_biotype "protein_coding"; oId "ce:circPan3-678-002"; tissue "ce";
12	ncSplice	exon	11431883	11432004	.	-	.	gene_id "ENSRNOG00000000942"; transcript_id "rnCircRNA-204"; exon_number "4" gene_name "Pan3"; gene_biotype "protein_coding"; oId "ce:circPan3-678-002"; tissue "ce";
12	ncSplice	gene	11411225	11432004	.	-	.	gene_id "ENSRNOG00000000942"; gene_name "Pan3"; gene_source "ncSplice"; gene_biotype "protein_coding";
12	ncSplice	transcript	11411225	11432004	.	-	.	gene_id "ENSRNOG00000000942"; transcript_id "rnCircRNA-205"; gene_name "Pan3"; gene_biotype "protein_coding"; transcript_biotype "circRNA"; oId "ce:circPan3-679-001"; tissue "ce";
12	ncSplice	exon	11411225	11416087	.	-	.	gene_id "ENSRNOG00000000942"; transcript_id "rnCircRNA-205"; exon_number "1" gene_name "Pan3"; gene_biotype "protein_coding"; oId "ce:circPan3-679-001"; tissue "ce";
12	ncSplice	exon	11428222	11428292	.	-	.	gene_id "ENSRNOG00000000942"; transcript_id "rnCircRNA-205"; exon_number "2" gene_name "Pan3"; gene_biotype "protein_coding"; oId "ce:circPan3-679-001"; tissue "ce";
12	ncSplice	exon	11429756	11429822	.	-	.	gene_id "ENSRNOG00000000942"; transcript_id "rnCircRNA-205"; exon_number "3" gene_name "Pan3"; gene_biotype "protein_coding"; oId "ce:circPan3-679-001"; tissue "ce";
12	ncSplice	exon	11431883	11432004	.	-	.	gene_id "ENSRNOG00000000942"; transcript_id "rnCircRNA-205"; exon_number "4" gene_name "Pan3"; gene_biotype "protein_coding"; oId "ce:circPan3-679-001"; tissue "ce";
12	ncSplice	gene	11428222	11432004	.	-	.	gene_id "ENSRNOG00000000942"; gene_name "Pan3"; gene_source "ncSplice"; gene_biotype "protein_coding";
12	ncSplice	transcript	11428222	11432004	.	-	.	gene_id "ENSRNOG00000000942"; transcript_id "rnCircRNA-206"; gene_name "Pan3"; gene_biotype "protein_coding"; transcript_biotype "circRNA"; oId "ce:circPan3-680-001|ts:circPan3-1182-002"; tissue "ce|ts";
12	ncSplice	exon	11428222	11428292	.	-	.	gene_id "ENSRNOG00000000942"; transcript_id "rnCircRNA-206"; exon_number "1" gene_name "Pan3"; gene_biotype "protein_coding"; oId "ce:circPan3-680-001|ts:circPan3-1182-002"; tissue "ce|ts";
12	ncSplice	exon	11429756	11429822	.	-	.	gene_id "ENSRNOG00000000942"; transcript_id "rnCircRNA-206"; exon_number "2" gene_name "Pan3"; gene_biotype "protein_coding"; oId "ce:circPan3-680-001|ts:circPan3-1182-002"; tissue "ce|ts";
12	ncSplice	exon	11431883	11432004	.	-	.	gene_id "ENSRNOG00000000942"; transcript_id "rnCircRNA-206"; exon_number "3" gene_name "Pan3"; gene_biotype "protein_coding"; oId "ce:circPan3-680-001|ts:circPan3-1182-002"; tissue "ce|ts";
1	ncSplice	gene	211823604	211834827	.	-	.	gene_id "ENSRNOG00000017137"; gene_name "Mettl10"; gene_source "ncSplice"; gene_biotype "protein_coding";
1	ncSplice	transcript	211823604	211834827	.	-	.	gene_id "ENSRNOG00000017137"; transcript_id "rnCircRNA-207"; gene_name "Mettl10"; gene_biotype "protein_coding"; transcript_biotype "circRNA"; oId "ce:circMettl10-687-001"; tissue "ce";
1	ncSplice	exon	211823604	211824709	.	-	.	gene_id "ENSRNOG00000017137"; transcript_id "rnCircRNA-207"; exon_number "1" gene_name "Mettl10"; gene_biotype "protein_coding"; oId "ce:circMettl10-687-001"; tissue "ce";
1	ncSplice	exon	211829552	211829768	.	-	.	gene_id "ENSRNOG00000017137"; transcript_id "rnCircRNA-207"; exon_number "2" gene_name "Mettl10"; gene_biotype "protein_coding"; oId "ce:circMettl10-687-001"; tissue "ce";
1	ncSplice	exon	211834720	211834827	.	-	.	gene_id "ENSRNOG00000017137"; transcript_id "rnCircRNA-207"; exon_number "3" gene_name "Mettl10"; gene_biotype "protein_coding"; oId "ce:circMettl10-687-001"; tissue "ce";
1	ncSplice	gene	211951683	211972631	.	+	.	gene_id "ENSRNOG00000017294"; gene_name "Zranb1"; gene_source "ncSplice"; gene_biotype "protein_coding";
1	ncSplice	transcript	211951683	211972631	.	+	.	gene_id "ENSRNOG00000017294"; transcript_id "rnCircRNA-208"; gene_name "Zranb1"; gene_biotype "protein_coding"; transcript_biotype "circRNA"; oId "ce:circZranb1-692-001"; tissue "ce";
1	ncSplice	exon	211951683	211954201	.	+	.	gene_id "ENSRNOG00000017294"; transcript_id "rnCircRNA-208"; exon_number "1" gene_name "Zranb1"; gene_biotype "protein_coding"; oId "ce:circZranb1-692-001"; tissue "ce";
1	ncSplice	exon	211972444	211972631	.	+	.	gene_id "ENSRNOG00000017294"; transcript_id "rnCircRNA-208"; exon_number "2" gene_name "Zranb1"; gene_biotype "protein_coding"; oId "ce:circZranb1-692-001"; tissue "ce";
1	ncSplice	gene	211951683	211980940	.	+	.	gene_id "ENSRNOG00000017294"; gene_name "Zranb1"; gene_source "ncSplice"; gene_biotype "protein_coding";
1	ncSplice	transcript	211951683	211980940	.	+	.	gene_id "ENSRNOG00000017294"; transcript_id "rnCircRNA-209"; gene_name "Zranb1"; gene_biotype "protein_coding"; transcript_biotype "circRNA"; oId "ce:circZranb1-694-001"; tissue "ce";
1	ncSplice	exon	211951683	211954201	.	+	.	gene_id "ENSRNOG00000017294"; transcript_id "rnCircRNA-209"; exon_number "1" gene_name "Zranb1"; gene_biotype "protein_coding"; oId "ce:circZranb1-694-001"; tissue "ce";
1	ncSplice	exon	211972444	211972631	.	+	.	gene_id "ENSRNOG00000017294"; transcript_id "rnCircRNA-209"; exon_number "2" gene_name "Zranb1"; gene_biotype "protein_coding"; oId "ce:circZranb1-694-001"; tissue "ce";
1	ncSplice	exon	211977080	211977233	.	+	.	gene_id "ENSRNOG00000017294"; transcript_id "rnCircRNA-209"; exon_number "3" gene_name "Zranb1"; gene_biotype "protein_coding"; oId "ce:circZranb1-694-001"; tissue "ce";
1	ncSplice	exon	211979200	211979271	.	+	.	gene_id "ENSRNOG00000017294"; transcript_id "rnCircRNA-209"; exon_number "4" gene_name "Zranb1"; gene_biotype "protein_coding"; oId "ce:circZranb1-694-001"; tissue "ce";
1	ncSplice	exon	211980742	211980940	.	+	.	gene_id "ENSRNOG00000017294"; transcript_id "rnCircRNA-209"; exon_number "5" gene_name "Zranb1"; gene_biotype "protein_coding"; oId "ce:circZranb1-694-001"; tissue "ce";
1	ncSplice	gene	211953351	211972631	.	+	.	gene_id "ENSRNOG00000017294"; gene_name "Zranb1"; gene_source "ncSplice"; gene_biotype "protein_coding";
1	ncSplice	transcript	211953351	211972631	.	+	.	gene_id "ENSRNOG00000017294"; transcript_id "rnCircRNA-210"; gene_name "Zranb1"; gene_biotype "protein_coding"; transcript_biotype "circRNA"; oId "ce:circZranb1-695-001"; tissue "ce";
1	ncSplice	exon	211953351	211954201	.	+	.	gene_id "ENSRNOG00000017294"; transcript_id "rnCircRNA-210"; exon_number "1" gene_name "Zranb1"; gene_biotype "protein_coding"; oId "ce:circZranb1-695-001"; tissue "ce";
1	ncSplice	exon	211972444	211972631	.	+	.	gene_id "ENSRNOG00000017294"; transcript_id "rnCircRNA-210"; exon_number "2" gene_name "Zranb1"; gene_biotype "protein_coding"; oId "ce:circZranb1-695-001"; tissue "ce";
1	ncSplice	gene	211972444	211980940	.	+	.	gene_id "ENSRNOG00000017294"; gene_name "Zranb1"; gene_source "ncSplice"; gene_biotype "protein_coding";
1	ncSplice	transcript	211972444	211980940	.	+	.	gene_id "ENSRNOG00000017294"; transcript_id "rnCircRNA-211"; gene_name "Zranb1"; gene_biotype "protein_coding"; transcript_biotype "circRNA"; oId "ce:circZranb1-697-001|ts:circZranb1-1209-002"; tissue "ce|ts";
1	ncSplice	exon	211972444	211972631	.	+	.	gene_id "ENSRNOG00000017294"; transcript_id "rnCircRNA-211"; exon_number "1" gene_name "Zranb1"; gene_biotype "protein_coding"; oId "ce:circZranb1-697-001|ts:circZranb1-1209-002"; tissue "ce|ts";
1	ncSplice	exon	211977080	211977233	.	+	.	gene_id "ENSRNOG00000017294"; transcript_id "rnCircRNA-211"; exon_number "2" gene_name "Zranb1"; gene_biotype "protein_coding"; oId "ce:circZranb1-697-001|ts:circZranb1-1209-002"; tissue "ce|ts";
1	ncSplice	exon	211979200	211979271	.	+	.	gene_id "ENSRNOG00000017294"; transcript_id "rnCircRNA-211"; exon_number "3" gene_name "Zranb1"; gene_biotype "protein_coding"; oId "ce:circZranb1-697-001|ts:circZranb1-1209-002"; tissue "ce|ts";
1	ncSplice	exon	211980742	211980940	.	+	.	gene_id "ENSRNOG00000017294"; transcript_id "rnCircRNA-211"; exon_number "4" gene_name "Zranb1"; gene_biotype "protein_coding"; oId "ce:circZranb1-697-001|ts:circZranb1-1209-002"; tissue "ce|ts";
1	ncSplice	gene	221480007	221498772	.	+	.	gene_id "ENSRNOG00000019534"; gene_name "Ap2a2"; gene_source "ncSplice"; gene_biotype "protein_coding";
1	ncSplice	transcript	221480007	221498772	.	+	.	gene_id "ENSRNOG00000019534"; transcript_id "rnCircRNA-212"; gene_name "Ap2a2"; gene_biotype "protein_coding"; transcript_biotype "circRNA"; oId "ce:circAp2a2-717-001"; tissue "ce";
1	ncSplice	exon	221480007	221480075	.	+	.	gene_id "ENSRNOG00000019534"; transcript_id "rnCircRNA-212"; exon_number "1" gene_name "Ap2a2"; gene_biotype "protein_coding"; oId "ce:circAp2a2-717-001"; tissue "ce";
1	ncSplice	exon	221491519	221491661	.	+	.	gene_id "ENSRNOG00000019534"; transcript_id "rnCircRNA-212"; exon_number "2" gene_name "Ap2a2"; gene_biotype "protein_coding"; oId "ce:circAp2a2-717-001"; tissue "ce";
1	ncSplice	exon	221492842	221493035	.	+	.	gene_id "ENSRNOG00000019534"; transcript_id "rnCircRNA-212"; exon_number "3" gene_name "Ap2a2"; gene_biotype "protein_coding"; oId "ce:circAp2a2-717-001"; tissue "ce";
1	ncSplice	exon	221496162	221496291	.	+	.	gene_id "ENSRNOG00000019534"; transcript_id "rnCircRNA-212"; exon_number "4" gene_name "Ap2a2"; gene_biotype "protein_coding"; oId "ce:circAp2a2-717-001"; tissue "ce";
1	ncSplice	exon	221498671	221498772	.	+	.	gene_id "ENSRNOG00000019534"; transcript_id "rnCircRNA-212"; exon_number "5" gene_name "Ap2a2"; gene_biotype "protein_coding"; oId "ce:circAp2a2-717-001"; tissue "ce";
1	ncSplice	gene	221846855	221851706	.	+	.	gene_id "ENSRNOG00000020021"; gene_name "Brsk2"; gene_source "ncSplice"; gene_biotype "protein_coding";
1	ncSplice	transcript	221846855	221851706	.	+	.	gene_id "ENSRNOG00000020021"; transcript_id "rnCircRNA-213"; gene_name "Brsk2"; gene_biotype "protein_coding"; transcript_biotype "circRNA"; oId "ce:circBrsk2-720-001"; tissue "ce";
1	ncSplice	exon	221846855	221847019	.	+	.	gene_id "ENSRNOG00000020021"; transcript_id "rnCircRNA-213"; exon_number "1" gene_name "Brsk2"; gene_biotype "protein_coding"; oId "ce:circBrsk2-720-001"; tissue "ce";
1	ncSplice	exon	221847215	221847312	.	+	.	gene_id "ENSRNOG00000020021"; transcript_id "rnCircRNA-213"; exon_number "2" gene_name "Brsk2"; gene_biotype "protein_coding"; oId "ce:circBrsk2-720-001"; tissue "ce";
1	ncSplice	exon	221847385	221847535	.	+	.	gene_id "ENSRNOG00000020021"; transcript_id "rnCircRNA-213"; exon_number "3" gene_name "Brsk2"; gene_biotype "protein_coding"; oId "ce:circBrsk2-720-001"; tissue "ce";
1	ncSplice	exon	221849748	221849813	.	+	.	gene_id "ENSRNOG00000020021"; transcript_id "rnCircRNA-213"; exon_number "4" gene_name "Brsk2"; gene_biotype "protein_coding"; oId "ce:circBrsk2-720-001"; tissue "ce";
1	ncSplice	exon	221851646	221851706	.	+	.	gene_id "ENSRNOG00000020021"; transcript_id "rnCircRNA-213"; exon_number "5" gene_name "Brsk2"; gene_biotype "protein_coding"; oId "ce:circBrsk2-720-001"; tissue "ce";
1	ncSplice	gene	222802618	222828466	.	-	.	gene_id "1:222802617:222828466:-1"; gene_name "1:222802617:222828466:-1"; gene_source "ncSplice"; gene_biotype "novel";
1	ncSplice	transcript	222802618	222828466	.	-	.	gene_id "1:222802617:222828466:-1"; transcript_id "rnCircRNA-214"; gene_name "1:222802617:222828466:-1"; gene_biotype "novel"; transcript_biotype "circRNA"; oId "ce:circ1:222802617:222828466:-1-721-001"; tissue "ce";
1	ncSplice	exon	222802618	222806321	.	-	.	gene_id "1:222802617:222828466:-1"; transcript_id "rnCircRNA-214"; exon_number "1" gene_name "1:222802617:222828466:-1"; gene_biotype "novel"; oId "ce:circ1:222802617:222828466:-1-721-001"; tissue "ce";
1	ncSplice	exon	222811764	222828466	.	-	.	gene_id "1:222802617:222828466:-1"; transcript_id "rnCircRNA-214"; exon_number "2" gene_name "1:222802617:222828466:-1"; gene_biotype "novel"; oId "ce:circ1:222802617:222828466:-1-721-001"; tissue "ce";
12	ncSplice	gene	24254591	24255201	.	-	.	gene_id "ENSRNOG00000001410"; gene_name "Gigyf1"; gene_source "ncSplice"; gene_biotype "protein_coding";
12	ncSplice	transcript	24254591	24255201	.	-	.	gene_id "ENSRNOG00000001410"; transcript_id "rnCircRNA-215"; gene_name "Gigyf1"; gene_biotype "protein_coding"; transcript_biotype "circRNA"; oId "ce:circGigyf1-724-001"; tissue "ce";
12	ncSplice	exon	24254591	24254815	.	-	.	gene_id "ENSRNOG00000001410"; transcript_id "rnCircRNA-215"; exon_number "1" gene_name "Gigyf1"; gene_biotype "protein_coding"; oId "ce:circGigyf1-724-001"; tissue "ce";
12	ncSplice	exon	24254894	24255037	.	-	.	gene_id "ENSRNOG00000001410"; transcript_id "rnCircRNA-215"; exon_number "2" gene_name "Gigyf1"; gene_biotype "protein_coding"; oId "ce:circGigyf1-724-001"; tissue "ce";
12	ncSplice	exon	24255119	24255201	.	-	.	gene_id "ENSRNOG00000001410"; transcript_id "rnCircRNA-215"; exon_number "3" gene_name "Gigyf1"; gene_biotype "protein_coding"; oId "ce:circGigyf1-724-001"; tissue "ce";
1	ncSplice	gene	22621909	22644194	.	+	.	gene_id "ENSRNOG00000013202"; gene_name "Akap7"; gene_source "ncSplice"; gene_biotype "protein_coding";
1	ncSplice	transcript	22621909	22644194	.	+	.	gene_id "ENSRNOG00000013202"; transcript_id "rnCircRNA-216"; gene_name "Akap7"; gene_biotype "protein_coding"; transcript_biotype "circRNA"; oId "ce:circAkap7-734-001"; tissue "ce";
1	ncSplice	exon	22621909	22622040	.	+	.	gene_id "ENSRNOG00000013202"; transcript_id "rnCircRNA-216"; exon_number "1" gene_name "Akap7"; gene_biotype "protein_coding"; oId "ce:circAkap7-734-001"; tissue "ce";
1	ncSplice	exon	22629077	22629231	.	+	.	gene_id "ENSRNOG00000013202"; transcript_id "rnCircRNA-216"; exon_number "2" gene_name "Akap7"; gene_biotype "protein_coding"; oId "ce:circAkap7-734-001"; tissue "ce";
1	ncSplice	exon	22640669	22640805	.	+	.	gene_id "ENSRNOG00000013202"; transcript_id "rnCircRNA-216"; exon_number "3" gene_name "Akap7"; gene_biotype "protein_coding"; oId "ce:circAkap7-734-001"; tissue "ce";
1	ncSplice	exon	22644034	22644194	.	+	.	gene_id "ENSRNOG00000013202"; transcript_id "rnCircRNA-216"; exon_number "4" gene_name "Akap7"; gene_biotype "protein_coding"; oId "ce:circAkap7-734-001"; tissue "ce";
1	ncSplice	gene	22640669	22644194	.	+	.	gene_id "ENSRNOG00000013202"; gene_name "Akap7"; gene_source "ncSplice"; gene_biotype "protein_coding";
1	ncSplice	transcript	22640669	22644194	.	+	.	gene_id "ENSRNOG00000013202"; transcript_id "rnCircRNA-217"; gene_name "Akap7"; gene_biotype "protein_coding"; transcript_biotype "circRNA"; oId "ce:circAkap7-740-001"; tissue "ce";
1	ncSplice	exon	22640669	22640805	.	+	.	gene_id "ENSRNOG00000013202"; transcript_id "rnCircRNA-217"; exon_number "1" gene_name "Akap7"; gene_biotype "protein_coding"; oId "ce:circAkap7-740-001"; tissue "ce";
1	ncSplice	exon	22644034	22644194	.	+	.	gene_id "ENSRNOG00000013202"; transcript_id "rnCircRNA-217"; exon_number "2" gene_name "Akap7"; gene_biotype "protein_coding"; oId "ce:circAkap7-740-001"; tissue "ce";
1	ncSplice	gene	226462149	226506459	.	-	.	gene_id "ENSRNOG00000019145"; gene_name "Kdm2a"; gene_source "ncSplice"; gene_biotype "protein_coding";
1	ncSplice	transcript	226462149	226506459	.	-	.	gene_id "ENSRNOG00000019145"; transcript_id "rnCircRNA-218"; gene_name "Kdm2a"; gene_biotype "protein_coding"; transcript_biotype "circRNA"; oId "ce:circKdm2a-745-001"; tissue "ce";
1	ncSplice	exon	226462149	226462543	.	-	.	gene_id "ENSRNOG00000019145"; transcript_id "rnCircRNA-218"; exon_number "1" gene_name "Kdm2a"; gene_biotype "protein_coding"; oId "ce:circKdm2a-745-001"; tissue "ce";
1	ncSplice	exon	226464947	226465073	.	-	.	gene_id "ENSRNOG00000019145"; transcript_id "rnCircRNA-218"; exon_number "2" gene_name "Kdm2a"; gene_biotype "protein_coding"; oId "ce:circKdm2a-745-001"; tissue "ce";
1	ncSplice	exon	226467555	226467670	.	-	.	gene_id "ENSRNOG00000019145"; transcript_id "rnCircRNA-218"; exon_number "3" gene_name "Kdm2a"; gene_biotype "protein_coding"; oId "ce:circKdm2a-745-001"; tissue "ce";
1	ncSplice	exon	226468478	226468631	.	-	.	gene_id "ENSRNOG00000019145"; transcript_id "rnCircRNA-218"; exon_number "4" gene_name "Kdm2a"; gene_biotype "protein_coding"; oId "ce:circKdm2a-745-001"; tissue "ce";
1	ncSplice	exon	226469950	226470043	.	-	.	gene_id "ENSRNOG00000019145"; transcript_id "rnCircRNA-218"; exon_number "5" gene_name "Kdm2a"; gene_biotype "protein_coding"; oId "ce:circKdm2a-745-001"; tissue "ce";
1	ncSplice	exon	226470464	226470570	.	-	.	gene_id "ENSRNOG00000019145"; transcript_id "rnCircRNA-218"; exon_number "6" gene_name "Kdm2a"; gene_biotype "protein_coding"; oId "ce:circKdm2a-745-001"; tissue "ce";
1	ncSplice	exon	226473137	226473315	.	-	.	gene_id "ENSRNOG00000019145"; transcript_id "rnCircRNA-218"; exon_number "7" gene_name "Kdm2a"; gene_biotype "protein_coding"; oId "ce:circKdm2a-745-001"; tissue "ce";
1	ncSplice	exon	226477238	226477284	.	-	.	gene_id "ENSRNOG00000019145"; transcript_id "rnCircRNA-218"; exon_number "8" gene_name "Kdm2a"; gene_biotype "protein_coding"; oId "ce:circKdm2a-745-001"; tissue "ce";
1	ncSplice	exon	226477670	226477748	.	-	.	gene_id "ENSRNOG00000019145"; transcript_id "rnCircRNA-218"; exon_number "9" gene_name "Kdm2a"; gene_biotype "protein_coding"; oId "ce:circKdm2a-745-001"; tissue "ce";
1	ncSplice	exon	226478660	226478798	.	-	.	gene_id "ENSRNOG00000019145"; transcript_id "rnCircRNA-218"; exon_number "10" gene_name "Kdm2a"; gene_biotype "protein_coding"; oId "ce:circKdm2a-745-001"; tissue "ce";
1	ncSplice	exon	226506365	226506459	.	-	.	gene_id "ENSRNOG00000019145"; transcript_id "rnCircRNA-218"; exon_number "11" gene_name "Kdm2a"; gene_biotype "protein_coding"; oId "ce:circKdm2a-745-001"; tissue "ce";
1	ncSplice	gene	226912319	226913923	.	-	.	gene_id "ENSRNOG00000048141"; gene_name "Rbm4"; gene_source "ncSplice"; gene_biotype "protein_coding";
1	ncSplice	transcript	226912319	226913923	.	-	.	gene_id "ENSRNOG00000048141"; transcript_id "rnCircRNA-219"; gene_name "Rbm4"; gene_biotype "protein_coding"; transcript_biotype "circRNA"; oId "ce:circRbm4-758-001"; tissue "ce";
1	ncSplice	exon	226912319	226912741	.	-	.	gene_id "ENSRNOG00000048141"; transcript_id "rnCircRNA-219"; exon_number "1" gene_name "Rbm4"; gene_biotype "protein_coding"; oId "ce:circRbm4-758-001"; tissue "ce";
1	ncSplice	exon	226913588	226913923	.	-	.	gene_id "ENSRNOG00000048141"; transcript_id "rnCircRNA-219"; exon_number "2" gene_name "Rbm4"; gene_biotype "protein_coding"; oId "ce:circRbm4-758-001"; tissue "ce";
1	ncSplice	gene	226912319	226980071	.	-	.	gene_id "ENSRNOG00000019691"; gene_name "Ccs"; gene_source "ncSplice"; gene_biotype "protein_coding";
1	ncSplice	transcript	226912319	226980071	.	-	.	gene_id "ENSRNOG00000019691"; transcript_id "rnCircRNA-220"; gene_name "Ccs"; gene_biotype "protein_coding"; transcript_biotype "circRNA"; oId "ce:circCcs-759-001"; tissue "ce";
1	ncSplice	exon	226912319	226912741	.	-	.	gene_id "ENSRNOG00000019691"; transcript_id "rnCircRNA-220"; exon_number "1" gene_name "Ccs"; gene_biotype "protein_coding"; oId "ce:circCcs-759-001"; tissue "ce";
1	ncSplice	exon	226913588	226913923	.	-	.	gene_id "ENSRNOG00000019691"; transcript_id "rnCircRNA-220"; exon_number "2" gene_name "Ccs"; gene_biotype "protein_coding"; oId "ce:circCcs-759-001"; tissue "ce";
1	ncSplice	exon	226978467	226980071	.	-	.	gene_id "ENSRNOG00000019691"; transcript_id "rnCircRNA-220"; exon_number "3" gene_name "Ccs"; gene_biotype "protein_coding"; oId "ce:circCcs-759-001"; tissue "ce";
1	ncSplice	gene	226913730	226978889	.	-	.	gene_id "ENSRNOG00000019691"; gene_name "Ccs"; gene_source "ncSplice"; gene_biotype "protein_coding";
1	ncSplice	transcript	226913730	226978889	.	-	.	gene_id "ENSRNOG00000019691"; transcript_id "rnCircRNA-221"; gene_name "Ccs"; gene_biotype "protein_coding"; transcript_biotype "circRNA"; oId "ce:circCcs-760-001"; tissue "ce";
1	ncSplice	exon	226913730	226913923	.	-	.	gene_id "ENSRNOG00000019691"; transcript_id "rnCircRNA-221"; exon_number "1" gene_name "Ccs"; gene_biotype "protein_coding"; oId "ce:circCcs-760-001"; tissue "ce";
1	ncSplice	exon	226978467	226978889	.	-	.	gene_id "ENSRNOG00000019691"; transcript_id "rnCircRNA-221"; exon_number "2" gene_name "Ccs"; gene_biotype "protein_coding"; oId "ce:circCcs-760-001"; tissue "ce";
12	ncSplice	gene	30745937	30750502	.	+	.	gene_id "ENSRNOG00000024435"; gene_name "Wbscr17"; gene_source "ncSplice"; gene_biotype "protein_coding";
12	ncSplice	transcript	30745937	30750502	.	+	.	gene_id "ENSRNOG00000024435"; transcript_id "rnCircRNA-222"; gene_name "Wbscr17"; gene_biotype "protein_coding"; transcript_biotype "circRNA"; oId "ce:circWbscr17-774-001"; tissue "ce";
12	ncSplice	exon	30745937	30746111	.	+	.	gene_id "ENSRNOG00000024435"; transcript_id "rnCircRNA-222"; exon_number "1" gene_name "Wbscr17"; gene_biotype "protein_coding"; oId "ce:circWbscr17-774-001"; tissue "ce";
12	ncSplice	exon	30750305	30750502	.	+	.	gene_id "ENSRNOG00000024435"; transcript_id "rnCircRNA-222"; exon_number "2" gene_name "Wbscr17"; gene_biotype "protein_coding"; oId "ce:circWbscr17-774-001"; tissue "ce";
1	ncSplice	gene	233512534	233512940	.	-	.	gene_id "ENSRNOG00000020646"; gene_name "Sdhaf2"; gene_source "ncSplice"; gene_biotype "protein_coding";
1	ncSplice	transcript	233512534	233512940	.	-	.	gene_id "ENSRNOG00000020646"; transcript_id "rnCircRNA-223"; gene_name "Sdhaf2"; gene_biotype "protein_coding"; transcript_biotype "circRNA"; oId "ce:circSdhaf2-782-001"; tissue "ce";
1	ncSplice	exon	233512534	233512643	.	-	.	gene_id "ENSRNOG00000020646"; transcript_id "rnCircRNA-223"; exon_number "1" gene_name "Sdhaf2"; gene_biotype "protein_coding"; oId "ce:circSdhaf2-782-001"; tissue "ce";
1	ncSplice	exon	233512723	233512940	.	-	.	gene_id "ENSRNOG00000020646"; transcript_id "rnCircRNA-223"; exon_number "2" gene_name "Sdhaf2"; gene_biotype "protein_coding"; oId "ce:circSdhaf2-782-001"; tissue "ce";
12	ncSplice	gene	42683816	42690243	.	-	.	gene_id "ENSRNOG00000001352"; gene_name "Hectd4"; gene_source "ncSplice"; gene_biotype "protein_coding";
12	ncSplice	transcript	42683816	42690243	.	-	.	gene_id "ENSRNOG00000001352"; transcript_id "rnCircRNA-224"; gene_name "Hectd4"; gene_biotype "protein_coding"; transcript_biotype "circRNA"; oId "ce:circHectd4-817-001"; tissue "ce";
12	ncSplice	exon	42683816	42683986	.	-	.	gene_id "ENSRNOG00000001352"; transcript_id "rnCircRNA-224"; exon_number "1" gene_name "Hectd4"; gene_biotype "protein_coding"; oId "ce:circHectd4-817-001"; tissue "ce";
12	ncSplice	exon	42684910	42689160	.	-	.	gene_id "ENSRNOG00000001352"; transcript_id "rnCircRNA-224"; exon_number "2" gene_name "Hectd4"; gene_biotype "protein_coding"; oId "ce:circHectd4-817-001"; tissue "ce";
12	ncSplice	exon	42690154	42690243	.	-	.	gene_id "ENSRNOG00000001352"; transcript_id "rnCircRNA-224"; exon_number "3" gene_name "Hectd4"; gene_biotype "protein_coding"; oId "ce:circHectd4-817-001"; tissue "ce";
12	ncSplice	gene	45338581	45412635	.	-	.	gene_id "ENSRNOG00000001120"; gene_name "Med13l"; gene_source "ncSplice"; gene_biotype "protein_coding";
12	ncSplice	transcript	45338581	45412635	.	-	.	gene_id "ENSRNOG00000001120"; transcript_id "rnCircRNA-225"; gene_name "Med13l"; gene_biotype "protein_coding"; transcript_biotype "circRNA"; oId "ce:circMed13l-833-001|ts:circMed13l-1606-003"; tissue "ce|ts";
12	ncSplice	exon	45338581	45338664	.	-	.	gene_id "ENSRNOG00000001120"; transcript_id "rnCircRNA-225"; exon_number "1" gene_name "Med13l"; gene_biotype "protein_coding"; oId "ce:circMed13l-833-001|ts:circMed13l-1606-003"; tissue "ce|ts";
12	ncSplice	exon	45348269	45348353	.	-	.	gene_id "ENSRNOG00000001120"; transcript_id "rnCircRNA-225"; exon_number "2" gene_name "Med13l"; gene_biotype "protein_coding"; oId "ce:circMed13l-833-001|ts:circMed13l-1606-003"; tissue "ce|ts";
12	ncSplice	exon	45412398	45412635	.	-	.	gene_id "ENSRNOG00000001120"; transcript_id "rnCircRNA-225"; exon_number "3" gene_name "Med13l"; gene_biotype "protein_coding"; oId "ce:circMed13l-833-001|ts:circMed13l-1606-003"; tissue "ce|ts";
12	ncSplice	gene	46641756	46646575	.	-	.	gene_id "ENSRNOG00000050710"; gene_name "AABR06072341.1"; gene_source "ncSplice"; gene_biotype "protein_coding";
12	ncSplice	transcript	46641756	46646575	.	-	.	gene_id "ENSRNOG00000050710"; transcript_id "rnCircRNA-226"; gene_name "AABR06072341.1"; gene_biotype "protein_coding"; transcript_biotype "circRNA"; oId "ce:circAABR06072341.1-839-001"; tissue "ce";
12	ncSplice	exon	46641756	46641906	.	-	.	gene_id "ENSRNOG00000050710"; transcript_id "rnCircRNA-226"; exon_number "1" gene_name "AABR06072341.1"; gene_biotype "protein_coding"; oId "ce:circAABR06072341.1-839-001"; tissue "ce";
12	ncSplice	exon	46646435	46646575	.	-	.	gene_id "ENSRNOG00000050710"; transcript_id "rnCircRNA-226"; exon_number "2" gene_name "AABR06072341.1"; gene_biotype "protein_coding"; oId "ce:circAABR06072341.1-839-001"; tissue "ce";
1	ncSplice	gene	249518494	249521730	.	-	.	gene_id "ENSRNOG00000015232"; gene_name "Pip5k1b"; gene_source "ncSplice"; gene_biotype "protein_coding";
1	ncSplice	transcript	249518494	249521730	.	-	.	gene_id "ENSRNOG00000015232"; transcript_id "rnCircRNA-227"; gene_name "Pip5k1b"; gene_biotype "protein_coding"; transcript_biotype "circRNA"; oId "ce:circPip5k1b-854-001"; tissue "ce";
1	ncSplice	exon	249518494	249518578	.	-	.	gene_id "ENSRNOG00000015232"; transcript_id "rnCircRNA-227"; exon_number "1" gene_name "Pip5k1b"; gene_biotype "protein_coding"; oId "ce:circPip5k1b-854-001"; tissue "ce";
1	ncSplice	exon	249521498	249521546	.	-	.	gene_id "ENSRNOG00000015232"; transcript_id "rnCircRNA-227"; exon_number "2" gene_name "Pip5k1b"; gene_biotype "protein_coding"; oId "ce:circPip5k1b-854-001"; tissue "ce";
1	ncSplice	exon	249521647	249521730	.	-	.	gene_id "ENSRNOG00000015232"; transcript_id "rnCircRNA-227"; exon_number "3" gene_name "Pip5k1b"; gene_biotype "protein_coding"; oId "ce:circPip5k1b-854-001"; tissue "ce";
12	ncSplice	gene	50622826	50624530	.	-	.	gene_id "ENSRNOG00000000705"; gene_name "Wscd2"; gene_source "ncSplice"; gene_biotype "protein_coding";
12	ncSplice	transcript	50622826	50624530	.	-	.	gene_id "ENSRNOG00000000705"; transcript_id "rnCircRNA-228"; gene_name "Wscd2"; gene_biotype "protein_coding"; transcript_biotype "circRNA"; oId "ce:circWscd2-859-001"; tissue "ce";
12	ncSplice	exon	50622826	50623000	.	-	.	gene_id "ENSRNOG00000000705"; transcript_id "rnCircRNA-228"; exon_number "1" gene_name "Wscd2"; gene_biotype "protein_coding"; oId "ce:circWscd2-859-001"; tissue "ce";
12	ncSplice	exon	50624409	50624530	.	-	.	gene_id "ENSRNOG00000000705"; transcript_id "rnCircRNA-228"; exon_number "2" gene_name "Wscd2"; gene_biotype "protein_coding"; oId "ce:circWscd2-859-001"; tissue "ce";
1	ncSplice	gene	251881846	251915894	.	+	.	gene_id "ENSRNOG00000011931"; gene_name "Smarca2"; gene_source "ncSplice"; gene_biotype "protein_coding";
1	ncSplice	transcript	251881846	251915894	.	+	.	gene_id "ENSRNOG00000011931"; transcript_id "rnCircRNA-229"; gene_name "Smarca2"; gene_biotype "protein_coding"; transcript_biotype "circRNA"; oId "ce:circSmarca2-861-001"; tissue "ce";
1	ncSplice	exon	251881846	251882106	.	+	.	gene_id "ENSRNOG00000011931"; transcript_id "rnCircRNA-229"; exon_number "1" gene_name "Smarca2"; gene_biotype "protein_coding"; oId "ce:circSmarca2-861-001"; tissue "ce";
1	ncSplice	exon	251885989	251886118	.	+	.	gene_id "ENSRNOG00000011931"; transcript_id "rnCircRNA-229"; exon_number "2" gene_name "Smarca2"; gene_biotype "protein_coding"; oId "ce:circSmarca2-861-001"; tissue "ce";
1	ncSplice	exon	251892555	251893004	.	+	.	gene_id "ENSRNOG00000011931"; transcript_id "rnCircRNA-229"; exon_number "3" gene_name "Smarca2"; gene_biotype "protein_coding"; oId "ce:circSmarca2-861-001"; tissue "ce";
1	ncSplice	exon	251901856	251902117	.	+	.	gene_id "ENSRNOG00000011931"; transcript_id "rnCircRNA-229"; exon_number "4" gene_name "Smarca2"; gene_biotype "protein_coding"; oId "ce:circSmarca2-861-001"; tissue "ce";
1	ncSplice	exon	251909153	251909279	.	+	.	gene_id "ENSRNOG00000011931"; transcript_id "rnCircRNA-229"; exon_number "5" gene_name "Smarca2"; gene_biotype "protein_coding"; oId "ce:circSmarca2-861-001"; tissue "ce";
1	ncSplice	exon	251911103	251911276	.	+	.	gene_id "ENSRNOG00000011931"; transcript_id "rnCircRNA-229"; exon_number "6" gene_name "Smarca2"; gene_biotype "protein_coding"; oId "ce:circSmarca2-861-001"; tissue "ce";
1	ncSplice	exon	251913390	251913563	.	+	.	gene_id "ENSRNOG00000011931"; transcript_id "rnCircRNA-229"; exon_number "7" gene_name "Smarca2"; gene_biotype "protein_coding"; oId "ce:circSmarca2-861-001"; tissue "ce";
1	ncSplice	exon	251915724	251915894	.	+	.	gene_id "ENSRNOG00000011931"; transcript_id "rnCircRNA-229"; exon_number "8" gene_name "Smarca2"; gene_biotype "protein_coding"; oId "ce:circSmarca2-861-001"; tissue "ce";
12	ncSplice	gene	51954867	51959706	.	+	.	gene_id "ENSRNOG00000025612"; gene_name "Sez6l"; gene_source "ncSplice"; gene_biotype "protein_coding";
12	ncSplice	transcript	51954867	51959706	.	+	.	gene_id "ENSRNOG00000025612"; transcript_id "rnCircRNA-230"; gene_name "Sez6l"; gene_biotype "protein_coding"; transcript_biotype "circRNA"; oId "ce:circSez6l-864-001"; tissue "ce";
12	ncSplice	exon	51954867	51955032	.	+	.	gene_id "ENSRNOG00000025612"; transcript_id "rnCircRNA-230"; exon_number "1" gene_name "Sez6l"; gene_biotype "protein_coding"; oId "ce:circSez6l-864-001"; tissue "ce";
12	ncSplice	exon	51956585	51956751	.	+	.	gene_id "ENSRNOG00000025612"; transcript_id "rnCircRNA-230"; exon_number "2" gene_name "Sez6l"; gene_biotype "protein_coding"; oId "ce:circSez6l-864-001"; tissue "ce";
12	ncSplice	exon	51958000	51958194	.	+	.	gene_id "ENSRNOG00000025612"; transcript_id "rnCircRNA-230"; exon_number "3" gene_name "Sez6l"; gene_biotype "protein_coding"; oId "ce:circSez6l-864-001"; tissue "ce";
12	ncSplice	exon	51959568	51959706	.	+	.	gene_id "ENSRNOG00000025612"; transcript_id "rnCircRNA-230"; exon_number "4" gene_name "Sez6l"; gene_biotype "protein_coding"; oId "ce:circSez6l-864-001"; tissue "ce";
12	ncSplice	gene	53322511	53323891	.	-	.	gene_id "ENSRNOG00000032590"; gene_name "Ttc28"; gene_source "ncSplice"; gene_biotype "protein_coding";
12	ncSplice	transcript	53322511	53323891	.	-	.	gene_id "ENSRNOG00000032590"; transcript_id "rnCircRNA-231"; gene_name "Ttc28"; gene_biotype "protein_coding"; transcript_biotype "circRNA"; oId "ce:circTtc28-870-001"; tissue "ce";
12	ncSplice	exon	53322511	53322641	.	-	.	gene_id "ENSRNOG00000032590"; transcript_id "rnCircRNA-231"; exon_number "1" gene_name "Ttc28"; gene_biotype "protein_coding"; oId "ce:circTtc28-870-001"; tissue "ce";
12	ncSplice	exon	53323619	53323891	.	-	.	gene_id "ENSRNOG00000032590"; transcript_id "rnCircRNA-231"; exon_number "2" gene_name "Ttc28"; gene_biotype "protein_coding"; oId "ce:circTtc28-870-001"; tissue "ce";
1	ncSplice	gene	254994292	255017431	.	+	.	gene_id "ENSRNOG00000016172"; gene_name "RGD1310016"; gene_source "ncSplice"; gene_biotype "protein_coding";
1	ncSplice	transcript	254994292	255017431	.	+	.	gene_id "ENSRNOG00000016172"; transcript_id "rnCircRNA-232"; gene_name "RGD1310016"; gene_biotype "protein_coding"; transcript_biotype "circRNA"; oId "ce:circRGD1310016-878-001"; tissue "ce";
1	ncSplice	exon	254994292	254994383	.	+	.	gene_id "ENSRNOG00000016172"; transcript_id "rnCircRNA-232"; exon_number "1" gene_name "RGD1310016"; gene_biotype "protein_coding"; oId "ce:circRGD1310016-878-001"; tissue "ce";
1	ncSplice	exon	254995682	254995770	.	+	.	gene_id "ENSRNOG00000016172"; transcript_id "rnCircRNA-232"; exon_number "2" gene_name "RGD1310016"; gene_biotype "protein_coding"; oId "ce:circRGD1310016-878-001"; tissue "ce";
1	ncSplice	exon	255003834	255003978	.	+	.	gene_id "ENSRNOG00000016172"; transcript_id "rnCircRNA-232"; exon_number "3" gene_name "RGD1310016"; gene_biotype "protein_coding"; oId "ce:circRGD1310016-878-001"; tissue "ce";
1	ncSplice	exon	255005058	255005106	.	+	.	gene_id "ENSRNOG00000016172"; transcript_id "rnCircRNA-232"; exon_number "4" gene_name "RGD1310016"; gene_biotype "protein_coding"; oId "ce:circRGD1310016-878-001"; tissue "ce";
1	ncSplice	exon	255006714	255006866	.	+	.	gene_id "ENSRNOG00000016172"; transcript_id "rnCircRNA-232"; exon_number "5" gene_name "RGD1310016"; gene_biotype "protein_coding"; oId "ce:circRGD1310016-878-001"; tissue "ce";
1	ncSplice	exon	255008782	255008985	.	+	.	gene_id "ENSRNOG00000016172"; transcript_id "rnCircRNA-232"; exon_number "6" gene_name "RGD1310016"; gene_biotype "protein_coding"; oId "ce:circRGD1310016-878-001"; tissue "ce";
1	ncSplice	exon	255013508	255013546	.	+	.	gene_id "ENSRNOG00000016172"; transcript_id "rnCircRNA-232"; exon_number "7" gene_name "RGD1310016"; gene_biotype "protein_coding"; oId "ce:circRGD1310016-878-001"; tissue "ce";
1	ncSplice	exon	255013827	255013937	.	+	.	gene_id "ENSRNOG00000016172"; transcript_id "rnCircRNA-232"; exon_number "8" gene_name "RGD1310016"; gene_biotype "protein_coding"; oId "ce:circRGD1310016-878-001"; tissue "ce";
1	ncSplice	exon	255015044	255015133	.	+	.	gene_id "ENSRNOG00000016172"; transcript_id "rnCircRNA-232"; exon_number "9" gene_name "RGD1310016"; gene_biotype "protein_coding"; oId "ce:circRGD1310016-878-001"; tissue "ce";
1	ncSplice	exon	255015843	255016003	.	+	.	gene_id "ENSRNOG00000016172"; transcript_id "rnCircRNA-232"; exon_number "10" gene_name "RGD1310016"; gene_biotype "protein_coding"; oId "ce:circRGD1310016-878-001"; tissue "ce";
1	ncSplice	exon	255017293	255017431	.	+	.	gene_id "ENSRNOG00000016172"; transcript_id "rnCircRNA-232"; exon_number "11" gene_name "RGD1310016"; gene_biotype "protein_coding"; oId "ce:circRGD1310016-878-001"; tissue "ce";
1	ncSplice	gene	258685624	258693123	.	+	.	gene_id "ENSRNOG00000020723"; gene_name "Pten"; gene_source "ncSplice"; gene_biotype "protein_coding";
1	ncSplice	transcript	258685624	258693123	.	+	.	gene_id "ENSRNOG00000020723"; transcript_id "rnCircRNA-233"; gene_name "Pten"; gene_biotype "protein_coding"; transcript_biotype "circRNA"; oId "ce:circPten-885-001"; tissue "ce";
1	ncSplice	exon	258685624	258685668	.	+	.	gene_id "ENSRNOG00000020723"; transcript_id "rnCircRNA-233"; exon_number "1" gene_name "Pten"; gene_biotype "protein_coding"; oId "ce:circPten-885-001"; tissue "ce";
1	ncSplice	exon	258690995	258691038	.	+	.	gene_id "ENSRNOG00000020723"; transcript_id "rnCircRNA-233"; exon_number "2" gene_name "Pten"; gene_biotype "protein_coding"; oId "ce:circPten-885-001"; tissue "ce";
1	ncSplice	exon	258692885	258693123	.	+	.	gene_id "ENSRNOG00000020723"; transcript_id "rnCircRNA-233"; exon_number "3" gene_name "Pten"; gene_biotype "protein_coding"; oId "ce:circPten-885-001"; tissue "ce";
12	ncSplice	gene	613523	617509	.	-	.	gene_id "ENSRNOG00000001108"; gene_name "N4bp2l2"; gene_source "ncSplice"; gene_biotype "protein_coding";
12	ncSplice	transcript	613523	617509	.	-	.	gene_id "ENSRNOG00000001108"; transcript_id "rnCircRNA-234"; gene_name "N4bp2l2"; gene_biotype "protein_coding"; transcript_biotype "circRNA"; oId "ce:circN4bp2l2-888-001|ts:circN4bp2l2-1709-001"; tissue "ce|ts";
12	ncSplice	exon	613523	613669	.	-	.	gene_id "ENSRNOG00000001108"; transcript_id "rnCircRNA-234"; exon_number "1" gene_name "N4bp2l2"; gene_biotype "protein_coding"; oId "ce:circN4bp2l2-888-001|ts:circN4bp2l2-1709-001"; tissue "ce|ts";
12	ncSplice	exon	616972	617048	.	-	.	gene_id "ENSRNOG00000001108"; transcript_id "rnCircRNA-234"; exon_number "2" gene_name "N4bp2l2"; gene_biotype "protein_coding"; oId "ce:circN4bp2l2-888-001|ts:circN4bp2l2-1709-001"; tissue "ce|ts";
12	ncSplice	exon	617421	617509	.	-	.	gene_id "ENSRNOG00000001108"; transcript_id "rnCircRNA-234"; exon_number "3" gene_name "N4bp2l2"; gene_biotype "protein_coding"; oId "ce:circN4bp2l2-888-001|ts:circN4bp2l2-1709-001"; tissue "ce|ts";
1	ncSplice	gene	263182837	263204371	.	-	.	gene_id "ENSRNOG00000020689"; gene_name "Cpeb3"; gene_source "ncSplice"; gene_biotype "protein_coding";
1	ncSplice	transcript	263182837	263204371	.	-	.	gene_id "ENSRNOG00000020689"; transcript_id "rnCircRNA-235"; gene_name "Cpeb3"; gene_biotype "protein_coding"; transcript_biotype "circRNA"; oId "ce:circCpeb3-900-001"; tissue "ce";
1	ncSplice	exon	263182837	263182955	.	-	.	gene_id "ENSRNOG00000020689"; transcript_id "rnCircRNA-235"; exon_number "1" gene_name "Cpeb3"; gene_biotype "protein_coding"; oId "ce:circCpeb3-900-001"; tissue "ce";
1	ncSplice	exon	263202969	263203058	.	-	.	gene_id "ENSRNOG00000020689"; transcript_id "rnCircRNA-235"; exon_number "2" gene_name "Cpeb3"; gene_biotype "protein_coding"; oId "ce:circCpeb3-900-001"; tissue "ce";
1	ncSplice	exon	263204204	263204371	.	-	.	gene_id "ENSRNOG00000020689"; transcript_id "rnCircRNA-235"; exon_number "3" gene_name "Cpeb3"; gene_biotype "protein_coding"; oId "ce:circCpeb3-900-001"; tissue "ce";
1	ncSplice	gene	263182837	263249491	.	-	.	gene_id "ENSRNOG00000020689"; gene_name "Cpeb3"; gene_source "ncSplice"; gene_biotype "protein_coding";
1	ncSplice	transcript	263182837	263249491	.	-	.	gene_id "ENSRNOG00000020689"; transcript_id "rnCircRNA-236"; gene_name "Cpeb3"; gene_biotype "protein_coding"; transcript_biotype "circRNA"; oId "ce:circCpeb3-902-001"; tissue "ce";
1	ncSplice	exon	263182837	263182955	.	-	.	gene_id "ENSRNOG00000020689"; transcript_id "rnCircRNA-236"; exon_number "1" gene_name "Cpeb3"; gene_biotype "protein_coding"; oId "ce:circCpeb3-902-001"; tissue "ce";
1	ncSplice	exon	263202969	263203058	.	-	.	gene_id "ENSRNOG00000020689"; transcript_id "rnCircRNA-236"; exon_number "2" gene_name "Cpeb3"; gene_biotype "protein_coding"; oId "ce:circCpeb3-902-001"; tissue "ce";
1	ncSplice	exon	263204204	263204371	.	-	.	gene_id "ENSRNOG00000020689"; transcript_id "rnCircRNA-236"; exon_number "3" gene_name "Cpeb3"; gene_biotype "protein_coding"; oId "ce:circCpeb3-902-001"; tissue "ce";
1	ncSplice	exon	263221018	263221041	.	-	.	gene_id "ENSRNOG00000020689"; transcript_id "rnCircRNA-236"; exon_number "4" gene_name "Cpeb3"; gene_biotype "protein_coding"; oId "ce:circCpeb3-902-001"; tissue "ce";
1	ncSplice	exon	263239443	263239499	.	-	.	gene_id "ENSRNOG00000020689"; transcript_id "rnCircRNA-236"; exon_number "5" gene_name "Cpeb3"; gene_biotype "protein_coding"; oId "ce:circCpeb3-902-001"; tissue "ce";
1	ncSplice	exon	263249332	263249491	.	-	.	gene_id "ENSRNOG00000020689"; transcript_id "rnCircRNA-236"; exon_number "6" gene_name "Cpeb3"; gene_biotype "protein_coding"; oId "ce:circCpeb3-902-001"; tissue "ce";
1	ncSplice	gene	263202969	263249491	.	-	.	gene_id "ENSRNOG00000020689"; gene_name "Cpeb3"; gene_source "ncSplice"; gene_biotype "protein_coding";
1	ncSplice	transcript	263202969	263249491	.	-	.	gene_id "ENSRNOG00000020689"; transcript_id "rnCircRNA-237"; gene_name "Cpeb3"; gene_biotype "protein_coding"; transcript_biotype "circRNA"; oId "ce:circCpeb3-905-001"; tissue "ce";
1	ncSplice	exon	263202969	263203058	.	-	.	gene_id "ENSRNOG00000020689"; transcript_id "rnCircRNA-237"; exon_number "1" gene_name "Cpeb3"; gene_biotype "protein_coding"; oId "ce:circCpeb3-905-001"; tissue "ce";
1	ncSplice	exon	263204204	263204371	.	-	.	gene_id "ENSRNOG00000020689"; transcript_id "rnCircRNA-237"; exon_number "2" gene_name "Cpeb3"; gene_biotype "protein_coding"; oId "ce:circCpeb3-905-001"; tissue "ce";
1	ncSplice	exon	263221018	263221041	.	-	.	gene_id "ENSRNOG00000020689"; transcript_id "rnCircRNA-237"; exon_number "3" gene_name "Cpeb3"; gene_biotype "protein_coding"; oId "ce:circCpeb3-905-001"; tissue "ce";
1	ncSplice	exon	263239443	263239499	.	-	.	gene_id "ENSRNOG00000020689"; transcript_id "rnCircRNA-237"; exon_number "4" gene_name "Cpeb3"; gene_biotype "protein_coding"; oId "ce:circCpeb3-905-001"; tissue "ce";
1	ncSplice	exon	263249332	263249491	.	-	.	gene_id "ENSRNOG00000020689"; transcript_id "rnCircRNA-237"; exon_number "5" gene_name "Cpeb3"; gene_biotype "protein_coding"; oId "ce:circCpeb3-905-001"; tissue "ce";
1	ncSplice	gene	272769330	272832862	.	-	.	gene_id "ENSRNOG00000017343"; gene_name "Fbxw4"; gene_source "ncSplice"; gene_biotype "protein_coding";
1	ncSplice	transcript	272769330	272832862	.	-	.	gene_id "ENSRNOG00000017343"; transcript_id "rnCircRNA-238"; gene_name "Fbxw4"; gene_biotype "protein_coding"; transcript_biotype "circRNA"; oId "ce:circFbxw4-942-001|ts:circFbxw4-1769-004"; tissue "ce|ts";
1	ncSplice	exon	272769330	272769395	.	-	.	gene_id "ENSRNOG00000017343"; transcript_id "rnCircRNA-238"; exon_number "1" gene_name "Fbxw4"; gene_biotype "protein_coding"; oId "ce:circFbxw4-942-001|ts:circFbxw4-1769-004"; tissue "ce|ts";
1	ncSplice	exon	272818290	272818384	.	-	.	gene_id "ENSRNOG00000017343"; transcript_id "rnCircRNA-238"; exon_number "2" gene_name "Fbxw4"; gene_biotype "protein_coding"; oId "ce:circFbxw4-942-001|ts:circFbxw4-1769-004"; tissue "ce|ts";
1	ncSplice	exon	272828470	272828602	.	-	.	gene_id "ENSRNOG00000017343"; transcript_id "rnCircRNA-238"; exon_number "3" gene_name "Fbxw4"; gene_biotype "protein_coding"; oId "ce:circFbxw4-942-001|ts:circFbxw4-1769-004"; tissue "ce|ts";
1	ncSplice	exon	272829098	272829283	.	-	.	gene_id "ENSRNOG00000017343"; transcript_id "rnCircRNA-238"; exon_number "4" gene_name "Fbxw4"; gene_biotype "protein_coding"; oId "ce:circFbxw4-942-001|ts:circFbxw4-1769-004"; tissue "ce|ts";
1	ncSplice	exon	272832767	272832862	.	-	.	gene_id "ENSRNOG00000017343"; transcript_id "rnCircRNA-238"; exon_number "5" gene_name "Fbxw4"; gene_biotype "protein_coding"; oId "ce:circFbxw4-942-001|ts:circFbxw4-1769-004"; tissue "ce|ts";
1	ncSplice	gene	272809321	272832862	.	-	.	gene_id "ENSRNOG00000017343"; gene_name "Fbxw4"; gene_source "ncSplice"; gene_biotype "protein_coding";
1	ncSplice	transcript	272809321	272832862	.	-	.	gene_id "ENSRNOG00000017343"; transcript_id "rnCircRNA-239"; gene_name "Fbxw4"; gene_biotype "protein_coding"; transcript_biotype "circRNA"; oId "ce:circFbxw4-943-001|ts:circFbxw4-1770-002"; tissue "ce|ts";
1	ncSplice	exon	272809321	272818384	.	-	.	gene_id "ENSRNOG00000017343"; transcript_id "rnCircRNA-239"; exon_number "1" gene_name "Fbxw4"; gene_biotype "protein_coding"; oId "ce:circFbxw4-943-001|ts:circFbxw4-1770-002"; tissue "ce|ts";
1	ncSplice	exon	272828470	272828602	.	-	.	gene_id "ENSRNOG00000017343"; transcript_id "rnCircRNA-239"; exon_number "2" gene_name "Fbxw4"; gene_biotype "protein_coding"; oId "ce:circFbxw4-943-001|ts:circFbxw4-1770-002"; tissue "ce|ts";
1	ncSplice	exon	272829098	272829283	.	-	.	gene_id "ENSRNOG00000017343"; transcript_id "rnCircRNA-239"; exon_number "3" gene_name "Fbxw4"; gene_biotype "protein_coding"; oId "ce:circFbxw4-943-001|ts:circFbxw4-1770-002"; tissue "ce|ts";
1	ncSplice	exon	272832767	272832862	.	-	.	gene_id "ENSRNOG00000017343"; transcript_id "rnCircRNA-239"; exon_number "4" gene_name "Fbxw4"; gene_biotype "protein_coding"; oId "ce:circFbxw4-943-001|ts:circFbxw4-1770-002"; tissue "ce|ts";
1	ncSplice	gene	272818290	272832862	.	-	.	gene_id "ENSRNOG00000017343"; gene_name "Fbxw4"; gene_source "ncSplice"; gene_biotype "protein_coding";
1	ncSplice	transcript	272818290	272832862	.	-	.	gene_id "ENSRNOG00000017343"; transcript_id "rnCircRNA-240"; gene_name "Fbxw4"; gene_biotype "protein_coding"; transcript_biotype "circRNA"; oId "ce:circFbxw4-944-001|ts:circFbxw4-1771-002"; tissue "ce|ts";
1	ncSplice	exon	272818290	272818384	.	-	.	gene_id "ENSRNOG00000017343"; transcript_id "rnCircRNA-240"; exon_number "1" gene_name "Fbxw4"; gene_biotype "protein_coding"; oId "ce:circFbxw4-944-001|ts:circFbxw4-1771-002"; tissue "ce|ts";
1	ncSplice	exon	272828470	272828602	.	-	.	gene_id "ENSRNOG00000017343"; transcript_id "rnCircRNA-240"; exon_number "2" gene_name "Fbxw4"; gene_biotype "protein_coding"; oId "ce:circFbxw4-944-001|ts:circFbxw4-1771-002"; tissue "ce|ts";
1	ncSplice	exon	272829098	272829283	.	-	.	gene_id "ENSRNOG00000017343"; transcript_id "rnCircRNA-240"; exon_number "3" gene_name "Fbxw4"; gene_biotype "protein_coding"; oId "ce:circFbxw4-944-001|ts:circFbxw4-1771-002"; tissue "ce|ts";
1	ncSplice	exon	272832767	272832862	.	-	.	gene_id "ENSRNOG00000017343"; transcript_id "rnCircRNA-240"; exon_number "4" gene_name "Fbxw4"; gene_biotype "protein_coding"; oId "ce:circFbxw4-944-001|ts:circFbxw4-1771-002"; tissue "ce|ts";
1	ncSplice	gene	272948396	272954643	.	-	.	gene_id "ENSRNOG00000017822"; gene_name "Mgea5"; gene_source "ncSplice"; gene_biotype "protein_coding";
1	ncSplice	transcript	272948396	272954643	.	-	.	gene_id "ENSRNOG00000017822"; transcript_id "rnCircRNA-241"; gene_name "Mgea5"; gene_biotype "protein_coding"; transcript_biotype "circRNA"; oId "ce:circMgea5-949-001"; tissue "ce";
1	ncSplice	exon	272948396	272948500	.	-	.	gene_id "ENSRNOG00000017822"; transcript_id "rnCircRNA-241"; exon_number "1" gene_name "Mgea5"; gene_biotype "protein_coding"; oId "ce:circMgea5-949-001"; tissue "ce";
1	ncSplice	exon	272949454	272952899	.	-	.	gene_id "ENSRNOG00000017822"; transcript_id "rnCircRNA-241"; exon_number "2" gene_name "Mgea5"; gene_biotype "protein_coding"; oId "ce:circMgea5-949-001"; tissue "ce";
1	ncSplice	exon	272954030	272954643	.	-	.	gene_id "ENSRNOG00000017822"; transcript_id "rnCircRNA-241"; exon_number "3" gene_name "Mgea5"; gene_biotype "protein_coding"; oId "ce:circMgea5-949-001"; tissue "ce";
1	ncSplice	gene	273035696	273083869	.	-	.	gene_id "ENSRNOG00000025523"; gene_name "RGD1564887"; gene_source "ncSplice"; gene_biotype "protein_coding";
1	ncSplice	transcript	273035696	273083869	.	-	.	gene_id "ENSRNOG00000025523"; transcript_id "rnCircRNA-242"; gene_name "RGD1564887"; gene_biotype "protein_coding"; transcript_biotype "circRNA"; oId "ce:circRGD1564887-950-001|ts:circRGD1564887-1774-001"; tissue "ce|ts";
1	ncSplice	exon	273035696	273035774	.	-	.	gene_id "ENSRNOG00000025523"; transcript_id "rnCircRNA-242"; exon_number "1" gene_name "RGD1564887"; gene_biotype "protein_coding"; oId "ce:circRGD1564887-950-001|ts:circRGD1564887-1774-001"; tissue "ce|ts";
1	ncSplice	exon	273077173	273077248	.	-	.	gene_id "ENSRNOG00000025523"; transcript_id "rnCircRNA-242"; exon_number "2" gene_name "RGD1564887"; gene_biotype "protein_coding"; oId "ce:circRGD1564887-950-001|ts:circRGD1564887-1774-001"; tissue "ce|ts";
1	ncSplice	exon	273082921	273083047	.	-	.	gene_id "ENSRNOG00000025523"; transcript_id "rnCircRNA-242"; exon_number "3" gene_name "RGD1564887"; gene_biotype "protein_coding"; oId "ce:circRGD1564887-950-001|ts:circRGD1564887-1774-001"; tissue "ce|ts";
1	ncSplice	exon	273083787	273083869	.	-	.	gene_id "ENSRNOG00000025523"; transcript_id "rnCircRNA-242"; exon_number "4" gene_name "RGD1564887"; gene_biotype "protein_coding"; oId "ce:circRGD1564887-950-001|ts:circRGD1564887-1774-001"; tissue "ce|ts";
1	ncSplice	gene	273077173	273083869	.	-	.	gene_id "ENSRNOG00000025523"; gene_name "RGD1564887"; gene_source "ncSplice"; gene_biotype "protein_coding";
1	ncSplice	transcript	273077173	273083869	.	-	.	gene_id "ENSRNOG00000025523"; transcript_id "rnCircRNA-243"; gene_name "RGD1564887"; gene_biotype "protein_coding"; transcript_biotype "circRNA"; oId "ce:circRGD1564887-951-001"; tissue "ce";
1	ncSplice	exon	273077173	273077248	.	-	.	gene_id "ENSRNOG00000025523"; transcript_id "rnCircRNA-243"; exon_number "1" gene_name "RGD1564887"; gene_biotype "protein_coding"; oId "ce:circRGD1564887-951-001"; tissue "ce";
1	ncSplice	exon	273082921	273083047	.	-	.	gene_id "ENSRNOG00000025523"; transcript_id "rnCircRNA-243"; exon_number "2" gene_name "RGD1564887"; gene_biotype "protein_coding"; oId "ce:circRGD1564887-951-001"; tissue "ce";
1	ncSplice	exon	273083787	273083869	.	-	.	gene_id "ENSRNOG00000025523"; transcript_id "rnCircRNA-243"; exon_number "3" gene_name "RGD1564887"; gene_biotype "protein_coding"; oId "ce:circRGD1564887-951-001"; tissue "ce";
1	ncSplice	gene	285126704	285128708	.	-	.	gene_id "ENSRNOG00000017164"; gene_name "Afap1l2"; gene_source "ncSplice"; gene_biotype "protein_coding";
1	ncSplice	transcript	285126704	285128708	.	-	.	gene_id "ENSRNOG00000017164"; transcript_id "rnCircRNA-244"; gene_name "Afap1l2"; gene_biotype "protein_coding"; transcript_biotype "circRNA"; oId "ce:circAfap1l2-974-001"; tissue "ce";
1	ncSplice	exon	285126704	285126883	.	-	.	gene_id "ENSRNOG00000017164"; transcript_id "rnCircRNA-244"; exon_number "1" gene_name "Afap1l2"; gene_biotype "protein_coding"; oId "ce:circAfap1l2-974-001"; tissue "ce";
1	ncSplice	exon	285128503	285128708	.	-	.	gene_id "ENSRNOG00000017164"; transcript_id "rnCircRNA-244"; exon_number "2" gene_name "Afap1l2"; gene_biotype "protein_coding"; oId "ce:circAfap1l2-974-001"; tissue "ce";
1	ncSplice	gene	285331659	285333365	.	-	.	gene_id "ENSRNOG00000013687"; gene_name "Ablim1"; gene_source "ncSplice"; gene_biotype "protein_coding";
1	ncSplice	transcript	285331659	285333365	.	-	.	gene_id "ENSRNOG00000013687"; transcript_id "rnCircRNA-245"; gene_name "Ablim1"; gene_biotype "protein_coding"; transcript_biotype "circRNA"; oId "ce:circAblim1-975-001"; tissue "ce";
1	ncSplice	exon	285331659	285331752	.	-	.	gene_id "ENSRNOG00000013687"; transcript_id "rnCircRNA-245"; exon_number "1" gene_name "Ablim1"; gene_biotype "protein_coding"; oId "ce:circAblim1-975-001"; tissue "ce";
1	ncSplice	exon	285333239	285333365	.	-	.	gene_id "ENSRNOG00000013687"; transcript_id "rnCircRNA-245"; exon_number "2" gene_name "Ablim1"; gene_biotype "protein_coding"; oId "ce:circAblim1-975-001"; tissue "ce";
1	ncSplice	gene	285948090	285961825	.	+	.	gene_id "ENSRNOG00000017406"; gene_name "Atrnl1"; gene_source "ncSplice"; gene_biotype "protein_coding";
1	ncSplice	transcript	285948090	285961825	.	+	.	gene_id "ENSRNOG00000017406"; transcript_id "rnCircRNA-246"; gene_name "Atrnl1"; gene_biotype "protein_coding"; transcript_biotype "circRNA"; oId "ce:circAtrnl1-977-001|ts:circAtrnl1-1816-001"; tissue "ce|ts";
1	ncSplice	exon	285948090	285948173	.	+	.	gene_id "ENSRNOG00000017406"; transcript_id "rnCircRNA-246"; exon_number "1" gene_name "Atrnl1"; gene_biotype "protein_coding"; oId "ce:circAtrnl1-977-001|ts:circAtrnl1-1816-001"; tissue "ce|ts";
1	ncSplice	exon	285949247	285949360	.	+	.	gene_id "ENSRNOG00000017406"; transcript_id "rnCircRNA-246"; exon_number "2" gene_name "Atrnl1"; gene_biotype "protein_coding"; oId "ce:circAtrnl1-977-001|ts:circAtrnl1-1816-001"; tissue "ce|ts";
1	ncSplice	exon	285957863	285957991	.	+	.	gene_id "ENSRNOG00000017406"; transcript_id "rnCircRNA-246"; exon_number "3" gene_name "Atrnl1"; gene_biotype "protein_coding"; oId "ce:circAtrnl1-977-001|ts:circAtrnl1-1816-001"; tissue "ce|ts";
1	ncSplice	exon	285961617	285961825	.	+	.	gene_id "ENSRNOG00000017406"; transcript_id "rnCircRNA-246"; exon_number "4" gene_name "Atrnl1"; gene_biotype "protein_coding"; oId "ce:circAtrnl1-977-001|ts:circAtrnl1-1816-001"; tissue "ce|ts";
1	ncSplice	gene	286044808	286113279	.	+	.	gene_id "ENSRNOG00000017406"; gene_name "Atrnl1"; gene_source "ncSplice"; gene_biotype "protein_coding";
1	ncSplice	transcript	286044808	286113279	.	+	.	gene_id "ENSRNOG00000017406"; transcript_id "rnCircRNA-247"; gene_name "Atrnl1"; gene_biotype "protein_coding"; transcript_biotype "circRNA"; oId "ce:circAtrnl1-982-001"; tissue "ce";
1	ncSplice	exon	286044808	286044901	.	+	.	gene_id "ENSRNOG00000017406"; transcript_id "rnCircRNA-247"; exon_number "1" gene_name "Atrnl1"; gene_biotype "protein_coding"; oId "ce:circAtrnl1-982-001"; tissue "ce";
1	ncSplice	exon	286052672	286052724	.	+	.	gene_id "ENSRNOG00000017406"; transcript_id "rnCircRNA-247"; exon_number "2" gene_name "Atrnl1"; gene_biotype "protein_coding"; oId "ce:circAtrnl1-982-001"; tissue "ce";
1	ncSplice	exon	286063713	286063807	.	+	.	gene_id "ENSRNOG00000017406"; transcript_id "rnCircRNA-247"; exon_number "3" gene_name "Atrnl1"; gene_biotype "protein_coding"; oId "ce:circAtrnl1-982-001"; tissue "ce";
1	ncSplice	exon	286065586	286065664	.	+	.	gene_id "ENSRNOG00000017406"; transcript_id "rnCircRNA-247"; exon_number "4" gene_name "Atrnl1"; gene_biotype "protein_coding"; oId "ce:circAtrnl1-982-001"; tissue "ce";
1	ncSplice	exon	286067110	286067267	.	+	.	gene_id "ENSRNOG00000017406"; transcript_id "rnCircRNA-247"; exon_number "5" gene_name "Atrnl1"; gene_biotype "protein_coding"; oId "ce:circAtrnl1-982-001"; tissue "ce";
1	ncSplice	exon	286095267	286095323	.	+	.	gene_id "ENSRNOG00000017406"; transcript_id "rnCircRNA-247"; exon_number "6" gene_name "Atrnl1"; gene_biotype "protein_coding"; oId "ce:circAtrnl1-982-001"; tissue "ce";
1	ncSplice	exon	286102175	286113279	.	+	.	gene_id "ENSRNOG00000017406"; transcript_id "rnCircRNA-247"; exon_number "7" gene_name "Atrnl1"; gene_biotype "protein_coding"; oId "ce:circAtrnl1-982-001"; tissue "ce";
1	ncSplice	gene	286063713	286113279	.	+	.	gene_id "ENSRNOG00000017406"; gene_name "Atrnl1"; gene_source "ncSplice"; gene_biotype "protein_coding";
1	ncSplice	transcript	286063713	286113279	.	+	.	gene_id "ENSRNOG00000017406"; transcript_id "rnCircRNA-248"; gene_name "Atrnl1"; gene_biotype "protein_coding"; transcript_biotype "circRNA"; oId "ce:circAtrnl1-985-001"; tissue "ce";
1	ncSplice	exon	286063713	286063807	.	+	.	gene_id "ENSRNOG00000017406"; transcript_id "rnCircRNA-248"; exon_number "1" gene_name "Atrnl1"; gene_biotype "protein_coding"; oId "ce:circAtrnl1-985-001"; tissue "ce";
1	ncSplice	exon	286065586	286065664	.	+	.	gene_id "ENSRNOG00000017406"; transcript_id "rnCircRNA-248"; exon_number "2" gene_name "Atrnl1"; gene_biotype "protein_coding"; oId "ce:circAtrnl1-985-001"; tissue "ce";
1	ncSplice	exon	286067110	286067267	.	+	.	gene_id "ENSRNOG00000017406"; transcript_id "rnCircRNA-248"; exon_number "3" gene_name "Atrnl1"; gene_biotype "protein_coding"; oId "ce:circAtrnl1-985-001"; tissue "ce";
1	ncSplice	exon	286095267	286095323	.	+	.	gene_id "ENSRNOG00000017406"; transcript_id "rnCircRNA-248"; exon_number "4" gene_name "Atrnl1"; gene_biotype "protein_coding"; oId "ce:circAtrnl1-985-001"; tissue "ce";
1	ncSplice	exon	286102175	286113279	.	+	.	gene_id "ENSRNOG00000017406"; transcript_id "rnCircRNA-248"; exon_number "5" gene_name "Atrnl1"; gene_biotype "protein_coding"; oId "ce:circAtrnl1-985-001"; tissue "ce";
1	ncSplice	gene	289175507	289198388	.	-	.	gene_id "ENSRNOG00000009954"; gene_name "Cacul1"; gene_source "ncSplice"; gene_biotype "protein_coding";
1	ncSplice	transcript	289175507	289198388	.	-	.	gene_id "ENSRNOG00000009954"; transcript_id "rnCircRNA-249"; gene_name "Cacul1"; gene_biotype "protein_coding"; transcript_biotype "circRNA"; oId "ce:circCacul1-989-001|ts:circCacul1-1842-002"; tissue "ce|ts";
1	ncSplice	exon	289175507	289175609	.	-	.	gene_id "ENSRNOG00000009954"; transcript_id "rnCircRNA-249"; exon_number "1" gene_name "Cacul1"; gene_biotype "protein_coding"; oId "ce:circCacul1-989-001|ts:circCacul1-1842-002"; tissue "ce|ts";
1	ncSplice	exon	289177813	289177908	.	-	.	gene_id "ENSRNOG00000009954"; transcript_id "rnCircRNA-249"; exon_number "2" gene_name "Cacul1"; gene_biotype "protein_coding"; oId "ce:circCacul1-989-001|ts:circCacul1-1842-002"; tissue "ce|ts";
1	ncSplice	exon	289197350	289197452	.	-	.	gene_id "ENSRNOG00000009954"; transcript_id "rnCircRNA-249"; exon_number "3" gene_name "Cacul1"; gene_biotype "protein_coding"; oId "ce:circCacul1-989-001|ts:circCacul1-1842-002"; tissue "ce|ts";
1	ncSplice	exon	289198262	289198388	.	-	.	gene_id "ENSRNOG00000009954"; transcript_id "rnCircRNA-249"; exon_number "4" gene_name "Cacul1"; gene_biotype "protein_coding"; oId "ce:circCacul1-989-001|ts:circCacul1-1842-002"; tissue "ce|ts";
13	ncSplice	gene	103393561	103410061	.	+	.	gene_id "ENSRNOG00000002841"; gene_name "Cdc42bpa"; gene_source "ncSplice"; gene_biotype "protein_coding";
13	ncSplice	transcript	103393561	103410061	.	+	.	gene_id "ENSRNOG00000002841"; transcript_id "rnCircRNA-250"; gene_name "Cdc42bpa"; gene_biotype "protein_coding"; transcript_biotype "circRNA"; oId "ce:circCdc42bpa-1005-001"; tissue "ce";
13	ncSplice	exon	103393561	103398565	.	+	.	gene_id "ENSRNOG00000002841"; transcript_id "rnCircRNA-250"; exon_number "1" gene_name "Cdc42bpa"; gene_biotype "protein_coding"; oId "ce:circCdc42bpa-1005-001"; tissue "ce";
13	ncSplice	exon	103401375	103401499	.	+	.	gene_id "ENSRNOG00000002841"; transcript_id "rnCircRNA-250"; exon_number "2" gene_name "Cdc42bpa"; gene_biotype "protein_coding"; oId "ce:circCdc42bpa-1005-001"; tissue "ce";
13	ncSplice	exon	103403770	103403875	.	+	.	gene_id "ENSRNOG00000002841"; transcript_id "rnCircRNA-250"; exon_number "3" gene_name "Cdc42bpa"; gene_biotype "protein_coding"; oId "ce:circCdc42bpa-1005-001"; tissue "ce";
13	ncSplice	exon	103404231	103404379	.	+	.	gene_id "ENSRNOG00000002841"; transcript_id "rnCircRNA-250"; exon_number "4" gene_name "Cdc42bpa"; gene_biotype "protein_coding"; oId "ce:circCdc42bpa-1005-001"; tissue "ce";
13	ncSplice	exon	103406697	103406788	.	+	.	gene_id "ENSRNOG00000002841"; transcript_id "rnCircRNA-250"; exon_number "5" gene_name "Cdc42bpa"; gene_biotype "protein_coding"; oId "ce:circCdc42bpa-1005-001"; tissue "ce";
13	ncSplice	exon	103409985	103410061	.	+	.	gene_id "ENSRNOG00000002841"; transcript_id "rnCircRNA-250"; exon_number "6" gene_name "Cdc42bpa"; gene_biotype "protein_coding"; oId "ce:circCdc42bpa-1005-001"; tissue "ce";
13	ncSplice	gene	104140910	104145431	.	+	.	gene_id "ENSRNOG00000003247"; gene_name "Sde2"; gene_source "ncSplice"; gene_biotype "protein_coding";
13	ncSplice	transcript	104140910	104145431	.	+	.	gene_id "ENSRNOG00000003247"; transcript_id "rnCircRNA-251"; gene_name "Sde2"; gene_biotype "protein_coding"; transcript_biotype "circRNA"; oId "ce:circSde2-1008-001|ts:circSde2-1891-008"; tissue "ce|ts";
13	ncSplice	exon	104140910	104141021	.	+	.	gene_id "ENSRNOG00000003247"; transcript_id "rnCircRNA-251"; exon_number "1" gene_name "Sde2"; gene_biotype "protein_coding"; oId "ce:circSde2-1008-001|ts:circSde2-1891-008"; tissue "ce|ts";
13	ncSplice	exon	104142359	104142528	.	+	.	gene_id "ENSRNOG00000003247"; transcript_id "rnCircRNA-251"; exon_number "2" gene_name "Sde2"; gene_biotype "protein_coding"; oId "ce:circSde2-1008-001|ts:circSde2-1891-008"; tissue "ce|ts";
13	ncSplice	exon	104143742	104143856	.	+	.	gene_id "ENSRNOG00000003247"; transcript_id "rnCircRNA-251"; exon_number "3" gene_name "Sde2"; gene_biotype "protein_coding"; oId "ce:circSde2-1008-001|ts:circSde2-1891-008"; tissue "ce|ts";
13	ncSplice	exon	104144942	104145431	.	+	.	gene_id "ENSRNOG00000003247"; transcript_id "rnCircRNA-251"; exon_number "4" gene_name "Sde2"; gene_biotype "protein_coding"; oId "ce:circSde2-1008-001|ts:circSde2-1891-008"; tissue "ce|ts";
13	ncSplice	gene	108029482	108035606	.	+	.	gene_id "ENSRNOG00000002393"; gene_name "Eprs"; gene_source "ncSplice"; gene_biotype "protein_coding";
13	ncSplice	transcript	108029482	108035606	.	+	.	gene_id "ENSRNOG00000002393"; transcript_id "rnCircRNA-252"; gene_name "Eprs"; gene_biotype "protein_coding"; transcript_biotype "circRNA"; oId "ce:circEprs-1016-001"; tissue "ce";
13	ncSplice	exon	108029482	108029637	.	+	.	gene_id "ENSRNOG00000002393"; transcript_id "rnCircRNA-252"; exon_number "1" gene_name "Eprs"; gene_biotype "protein_coding"; oId "ce:circEprs-1016-001"; tissue "ce";
13	ncSplice	exon	108030864	108031061	.	+	.	gene_id "ENSRNOG00000002393"; transcript_id "rnCircRNA-252"; exon_number "2" gene_name "Eprs"; gene_biotype "protein_coding"; oId "ce:circEprs-1016-001"; tissue "ce";
13	ncSplice	exon	108033299	108033472	.	+	.	gene_id "ENSRNOG00000002393"; transcript_id "rnCircRNA-252"; exon_number "3" gene_name "Eprs"; gene_biotype "protein_coding"; oId "ce:circEprs-1016-001"; tissue "ce";
13	ncSplice	exon	108035446	108035606	.	+	.	gene_id "ENSRNOG00000002393"; transcript_id "rnCircRNA-252"; exon_number "4" gene_name "Eprs"; gene_biotype "protein_coding"; oId "ce:circEprs-1016-001"; tissue "ce";
13	ncSplice	gene	115695769	115701641	.	+	.	gene_id "ENSRNOG00000003841"; gene_name "Kcnh1"; gene_source "ncSplice"; gene_biotype "protein_coding";
13	ncSplice	transcript	115695769	115701641	.	+	.	gene_id "ENSRNOG00000003841"; transcript_id "rnCircRNA-253"; gene_name "Kcnh1"; gene_biotype "protein_coding"; transcript_biotype "circRNA"; oId "ce:circKcnh1-1033-001"; tissue "ce";
13	ncSplice	exon	115695769	115695968	.	+	.	gene_id "ENSRNOG00000003841"; transcript_id "rnCircRNA-253"; exon_number "1" gene_name "Kcnh1"; gene_biotype "protein_coding"; oId "ce:circKcnh1-1033-001"; tissue "ce";
13	ncSplice	exon	115701389	115701641	.	+	.	gene_id "ENSRNOG00000003841"; transcript_id "rnCircRNA-253"; exon_number "2" gene_name "Kcnh1"; gene_biotype "protein_coding"; oId "ce:circKcnh1-1033-001"; tissue "ce";
13	ncSplice	gene	115695769	115717336	.	+	.	gene_id "ENSRNOG00000003841"; gene_name "Kcnh1"; gene_source "ncSplice"; gene_biotype "protein_coding";
13	ncSplice	transcript	115695769	115717336	.	+	.	gene_id "ENSRNOG00000003841"; transcript_id "rnCircRNA-254"; gene_name "Kcnh1"; gene_biotype "protein_coding"; transcript_biotype "circRNA"; oId "ce:circKcnh1-1034-001"; tissue "ce";
13	ncSplice	exon	115695769	115695968	.	+	.	gene_id "ENSRNOG00000003841"; transcript_id "rnCircRNA-254"; exon_number "1" gene_name "Kcnh1"; gene_biotype "protein_coding"; oId "ce:circKcnh1-1034-001"; tissue "ce";
13	ncSplice	exon	115701389	115701641	.	+	.	gene_id "ENSRNOG00000003841"; transcript_id "rnCircRNA-254"; exon_number "2" gene_name "Kcnh1"; gene_biotype "protein_coding"; oId "ce:circKcnh1-1034-001"; tissue "ce";
13	ncSplice	exon	115717140	115717336	.	+	.	gene_id "ENSRNOG00000003841"; transcript_id "rnCircRNA-254"; exon_number "3" gene_name "Kcnh1"; gene_biotype "protein_coding"; oId "ce:circKcnh1-1034-001"; tissue "ce";
13	ncSplice	gene	116263565	116270109	.	-	.	gene_id "ENSRNOG00000046139"; gene_name "Syt14"; gene_source "ncSplice"; gene_biotype "protein_coding";
13	ncSplice	transcript	116263565	116270109	.	-	.	gene_id "ENSRNOG00000046139"; transcript_id "rnCircRNA-255"; gene_name "Syt14"; gene_biotype "protein_coding"; transcript_biotype "circRNA"; oId "ce:circSyt14-1038-001"; tissue "ce";
13	ncSplice	exon	116263565	116263780	.	-	.	gene_id "ENSRNOG00000046139"; transcript_id "rnCircRNA-255"; exon_number "1" gene_name "Syt14"; gene_biotype "protein_coding"; oId "ce:circSyt14-1038-001"; tissue "ce";
13	ncSplice	exon	116269945	116270109	.	-	.	gene_id "ENSRNOG00000046139"; transcript_id "rnCircRNA-255"; exon_number "2" gene_name "Syt14"; gene_biotype "protein_coding"; oId "ce:circSyt14-1038-001"; tissue "ce";
13	ncSplice	gene	36278977	36291463	.	+	.	gene_id "ENSRNOG00000032490"; gene_name "Cdh7"; gene_source "ncSplice"; gene_biotype "protein_coding";
13	ncSplice	transcript	36278977	36291463	.	+	.	gene_id "ENSRNOG00000032490"; transcript_id "rnCircRNA-256"; gene_name "Cdh7"; gene_biotype "protein_coding"; transcript_biotype "circRNA"; oId "ce:circCdh7-1050-001"; tissue "ce";
13	ncSplice	exon	36278977	36279271	.	+	.	gene_id "ENSRNOG00000032490"; transcript_id "rnCircRNA-256"; exon_number "1" gene_name "Cdh7"; gene_biotype "protein_coding"; oId "ce:circCdh7-1050-001"; tissue "ce";
13	ncSplice	exon	36282926	36283045	.	+	.	gene_id "ENSRNOG00000032490"; transcript_id "rnCircRNA-256"; exon_number "2" gene_name "Cdh7"; gene_biotype "protein_coding"; oId "ce:circCdh7-1050-001"; tissue "ce";
13	ncSplice	exon	36291296	36291463	.	+	.	gene_id "ENSRNOG00000032490"; transcript_id "rnCircRNA-256"; exon_number "3" gene_name "Cdh7"; gene_biotype "protein_coding"; oId "ce:circCdh7-1050-001"; tissue "ce";
13	ncSplice	gene	36278977	36301658	.	+	.	gene_id "ENSRNOG00000032490"; gene_name "Cdh7"; gene_source "ncSplice"; gene_biotype "protein_coding";
13	ncSplice	transcript	36278977	36301658	.	+	.	gene_id "ENSRNOG00000032490"; transcript_id "rnCircRNA-257"; gene_name "Cdh7"; gene_biotype "protein_coding"; transcript_biotype "circRNA"; oId "ce:circCdh7-1051-001"; tissue "ce";
13	ncSplice	exon	36278977	36279271	.	+	.	gene_id "ENSRNOG00000032490"; transcript_id "rnCircRNA-257"; exon_number "1" gene_name "Cdh7"; gene_biotype "protein_coding"; oId "ce:circCdh7-1051-001"; tissue "ce";
13	ncSplice	exon	36282926	36283045	.	+	.	gene_id "ENSRNOG00000032490"; transcript_id "rnCircRNA-257"; exon_number "2" gene_name "Cdh7"; gene_biotype "protein_coding"; oId "ce:circCdh7-1051-001"; tissue "ce";
13	ncSplice	exon	36291296	36291463	.	+	.	gene_id "ENSRNOG00000032490"; transcript_id "rnCircRNA-257"; exon_number "3" gene_name "Cdh7"; gene_biotype "protein_coding"; oId "ce:circCdh7-1051-001"; tissue "ce";
13	ncSplice	exon	36301471	36301658	.	+	.	gene_id "ENSRNOG00000032490"; transcript_id "rnCircRNA-257"; exon_number "4" gene_name "Cdh7"; gene_biotype "protein_coding"; oId "ce:circCdh7-1051-001"; tissue "ce";
13	ncSplice	gene	36278977	36325043	.	+	.	gene_id "ENSRNOG00000032490"; gene_name "Cdh7"; gene_source "ncSplice"; gene_biotype "protein_coding";
13	ncSplice	transcript	36278977	36325043	.	+	.	gene_id "ENSRNOG00000032490"; transcript_id "rnCircRNA-258"; gene_name "Cdh7"; gene_biotype "protein_coding"; transcript_biotype "circRNA"; oId "ce:circCdh7-1052-001"; tissue "ce";
13	ncSplice	exon	36278977	36279271	.	+	.	gene_id "ENSRNOG00000032490"; transcript_id "rnCircRNA-258"; exon_number "1" gene_name "Cdh7"; gene_biotype "protein_coding"; oId "ce:circCdh7-1052-001"; tissue "ce";
13	ncSplice	exon	36282926	36283045	.	+	.	gene_id "ENSRNOG00000032490"; transcript_id "rnCircRNA-258"; exon_number "2" gene_name "Cdh7"; gene_biotype "protein_coding"; oId "ce:circCdh7-1052-001"; tissue "ce";
13	ncSplice	exon	36291296	36291463	.	+	.	gene_id "ENSRNOG00000032490"; transcript_id "rnCircRNA-258"; exon_number "3" gene_name "Cdh7"; gene_biotype "protein_coding"; oId "ce:circCdh7-1052-001"; tissue "ce";
13	ncSplice	exon	36301471	36301658	.	+	.	gene_id "ENSRNOG00000032490"; transcript_id "rnCircRNA-258"; exon_number "4" gene_name "Cdh7"; gene_biotype "protein_coding"; oId "ce:circCdh7-1052-001"; tissue "ce";
13	ncSplice	exon	36324790	36325043	.	+	.	gene_id "ENSRNOG00000032490"; transcript_id "rnCircRNA-258"; exon_number "5" gene_name "Cdh7"; gene_biotype "protein_coding"; oId "ce:circCdh7-1052-001"; tissue "ce";
13	ncSplice	gene	40711715	40722349	.	-	.	gene_id "ENSRNOG00000002538"; gene_name "Epb4.1l5"; gene_source "ncSplice"; gene_biotype "protein_coding";
13	ncSplice	transcript	40711715	40722349	.	-	.	gene_id "ENSRNOG00000002538"; transcript_id "rnCircRNA-259"; gene_name "Epb4.1l5"; gene_biotype "protein_coding"; transcript_biotype "circRNA"; oId "ce:circEpb4.1l5-1061-001|ts:circEpb4.1l5-1961-002"; tissue "ce|ts";
13	ncSplice	exon	40711715	40711779	.	-	.	gene_id "ENSRNOG00000002538"; transcript_id "rnCircRNA-259"; exon_number "1" gene_name "Epb4.1l5"; gene_biotype "protein_coding"; oId "ce:circEpb4.1l5-1061-001|ts:circEpb4.1l5-1961-002"; tissue "ce|ts";
13	ncSplice	exon	40713869	40713997	.	-	.	gene_id "ENSRNOG00000002538"; transcript_id "rnCircRNA-259"; exon_number "2" gene_name "Epb4.1l5"; gene_biotype "protein_coding"; oId "ce:circEpb4.1l5-1061-001|ts:circEpb4.1l5-1961-002"; tissue "ce|ts";
13	ncSplice	exon	40716577	40716674	.	-	.	gene_id "ENSRNOG00000002538"; transcript_id "rnCircRNA-259"; exon_number "3" gene_name "Epb4.1l5"; gene_biotype "protein_coding"; oId "ce:circEpb4.1l5-1061-001|ts:circEpb4.1l5-1961-002"; tissue "ce|ts";
13	ncSplice	exon	40722186	40722349	.	-	.	gene_id "ENSRNOG00000002538"; transcript_id "rnCircRNA-259"; exon_number "4" gene_name "Epb4.1l5"; gene_biotype "protein_coding"; oId "ce:circEpb4.1l5-1061-001|ts:circEpb4.1l5-1961-002"; tissue "ce|ts";
13	ncSplice	gene	40863225	40898880	.	-	.	gene_id "ENSRNOG00000002625"; gene_name "Ptpn4"; gene_source "ncSplice"; gene_biotype "protein_coding";
13	ncSplice	transcript	40863225	40898880	.	-	.	gene_id "ENSRNOG00000002625"; transcript_id "rnCircRNA-260"; gene_name "Ptpn4"; gene_biotype "protein_coding"; transcript_biotype "circRNA"; oId "ce:circPtpn4-1064-001"; tissue "ce";
13	ncSplice	exon	40863225	40863397	.	-	.	gene_id "ENSRNOG00000002625"; transcript_id "rnCircRNA-260"; exon_number "1" gene_name "Ptpn4"; gene_biotype "protein_coding"; oId "ce:circPtpn4-1064-001"; tissue "ce";
13	ncSplice	exon	40866882	40866945	.	-	.	gene_id "ENSRNOG00000002625"; transcript_id "rnCircRNA-260"; exon_number "2" gene_name "Ptpn4"; gene_biotype "protein_coding"; oId "ce:circPtpn4-1064-001"; tissue "ce";
13	ncSplice	exon	40884136	40884224	.	-	.	gene_id "ENSRNOG00000002625"; transcript_id "rnCircRNA-260"; exon_number "3" gene_name "Ptpn4"; gene_biotype "protein_coding"; oId "ce:circPtpn4-1064-001"; tissue "ce";
13	ncSplice	exon	40888215	40888302	.	-	.	gene_id "ENSRNOG00000002625"; transcript_id "rnCircRNA-260"; exon_number "4" gene_name "Ptpn4"; gene_biotype "protein_coding"; oId "ce:circPtpn4-1064-001"; tissue "ce";
13	ncSplice	exon	40897904	40898024	.	-	.	gene_id "ENSRNOG00000002625"; transcript_id "rnCircRNA-260"; exon_number "5" gene_name "Ptpn4"; gene_biotype "protein_coding"; oId "ce:circPtpn4-1064-001"; tissue "ce";
13	ncSplice	exon	40898299	40898351	.	-	.	gene_id "ENSRNOG00000002625"; transcript_id "rnCircRNA-260"; exon_number "6" gene_name "Ptpn4"; gene_biotype "protein_coding"; oId "ce:circPtpn4-1064-001"; tissue "ce";
13	ncSplice	exon	40898836	40898880	.	-	.	gene_id "ENSRNOG00000002625"; transcript_id "rnCircRNA-260"; exon_number "7" gene_name "Ptpn4"; gene_biotype "protein_coding"; oId "ce:circPtpn4-1064-001"; tissue "ce";
13	ncSplice	gene	40884136	40898880	.	-	.	gene_id "ENSRNOG00000002625"; gene_name "Ptpn4"; gene_source "ncSplice"; gene_biotype "protein_coding";
13	ncSplice	transcript	40884136	40898880	.	-	.	gene_id "ENSRNOG00000002625"; transcript_id "rnCircRNA-261"; gene_name "Ptpn4"; gene_biotype "protein_coding"; transcript_biotype "circRNA"; oId "ce:circPtpn4-1065-001"; tissue "ce";
13	ncSplice	exon	40884136	40884224	.	-	.	gene_id "ENSRNOG00000002625"; transcript_id "rnCircRNA-261"; exon_number "1" gene_name "Ptpn4"; gene_biotype "protein_coding"; oId "ce:circPtpn4-1065-001"; tissue "ce";
13	ncSplice	exon	40888215	40888302	.	-	.	gene_id "ENSRNOG00000002625"; transcript_id "rnCircRNA-261"; exon_number "2" gene_name "Ptpn4"; gene_biotype "protein_coding"; oId "ce:circPtpn4-1065-001"; tissue "ce";
13	ncSplice	exon	40897904	40898024	.	-	.	gene_id "ENSRNOG00000002625"; transcript_id "rnCircRNA-261"; exon_number "3" gene_name "Ptpn4"; gene_biotype "protein_coding"; oId "ce:circPtpn4-1065-001"; tissue "ce";
13	ncSplice	exon	40898299	40898351	.	-	.	gene_id "ENSRNOG00000002625"; transcript_id "rnCircRNA-261"; exon_number "4" gene_name "Ptpn4"; gene_biotype "protein_coding"; oId "ce:circPtpn4-1065-001"; tissue "ce";
13	ncSplice	exon	40898836	40898880	.	-	.	gene_id "ENSRNOG00000002625"; transcript_id "rnCircRNA-261"; exon_number "5" gene_name "Ptpn4"; gene_biotype "protein_coding"; oId "ce:circPtpn4-1065-001"; tissue "ce";
13	ncSplice	gene	53203185	53204302	.	-	.	gene_id "ENSRNOG00000006733"; gene_name "Srgap2"; gene_source "ncSplice"; gene_biotype "protein_coding";
13	ncSplice	transcript	53203185	53204302	.	-	.	gene_id "ENSRNOG00000006733"; transcript_id "rnCircRNA-262"; gene_name "Srgap2"; gene_biotype "protein_coding"; transcript_biotype "circRNA"; oId "ce:circSrgap2-1074-001"; tissue "ce";
13	ncSplice	exon	53203185	53203313	.	-	.	gene_id "ENSRNOG00000006733"; transcript_id "rnCircRNA-262"; exon_number "1" gene_name "Srgap2"; gene_biotype "protein_coding"; oId "ce:circSrgap2-1074-001"; tissue "ce";
13	ncSplice	exon	53204087	53204302	.	-	.	gene_id "ENSRNOG00000006733"; transcript_id "rnCircRNA-262"; exon_number "2" gene_name "Srgap2"; gene_biotype "protein_coding"; oId "ce:circSrgap2-1074-001"; tissue "ce";
13	ncSplice	gene	61119948	61152916	.	+	.	gene_id "ENSRNOG00000011063"; gene_name "Dennd1b"; gene_source "ncSplice"; gene_biotype "protein_coding";
13	ncSplice	transcript	61119948	61152916	.	+	.	gene_id "ENSRNOG00000011063"; transcript_id "rnCircRNA-263"; gene_name "Dennd1b"; gene_biotype "protein_coding"; transcript_biotype "circRNA"; oId "ce:circDennd1b-1091-001|ts:circDennd1b-2029-006"; tissue "ce|ts";
13	ncSplice	exon	61119948	61119997	.	+	.	gene_id "ENSRNOG00000011063"; transcript_id "rnCircRNA-263"; exon_number "1" gene_name "Dennd1b"; gene_biotype "protein_coding"; oId "ce:circDennd1b-1091-001|ts:circDennd1b-2029-006"; tissue "ce|ts";
13	ncSplice	exon	61121856	61121975	.	+	.	gene_id "ENSRNOG00000011063"; transcript_id "rnCircRNA-263"; exon_number "2" gene_name "Dennd1b"; gene_biotype "protein_coding"; oId "ce:circDennd1b-1091-001|ts:circDennd1b-2029-006"; tissue "ce|ts";
13	ncSplice	exon	61137858	61137927	.	+	.	gene_id "ENSRNOG00000011063"; transcript_id "rnCircRNA-263"; exon_number "3" gene_name "Dennd1b"; gene_biotype "protein_coding"; oId "ce:circDennd1b-1091-001|ts:circDennd1b-2029-006"; tissue "ce|ts";
13	ncSplice	exon	61138681	61138761	.	+	.	gene_id "ENSRNOG00000011063"; transcript_id "rnCircRNA-263"; exon_number "4" gene_name "Dennd1b"; gene_biotype "protein_coding"; oId "ce:circDennd1b-1091-001|ts:circDennd1b-2029-006"; tissue "ce|ts";
13	ncSplice	exon	61145005	61145058	.	+	.	gene_id "ENSRNOG00000011063"; transcript_id "rnCircRNA-263"; exon_number "5" gene_name "Dennd1b"; gene_biotype "protein_coding"; oId "ce:circDennd1b-1091-001|ts:circDennd1b-2029-006"; tissue "ce|ts";
13	ncSplice	exon	61152806	61152916	.	+	.	gene_id "ENSRNOG00000011063"; transcript_id "rnCircRNA-263"; exon_number "6" gene_name "Dennd1b"; gene_biotype "protein_coding"; oId "ce:circDennd1b-1091-001|ts:circDennd1b-2029-006"; tissue "ce|ts";
13	ncSplice	gene	61137858	61152916	.	+	.	gene_id "ENSRNOG00000011063"; gene_name "Dennd1b"; gene_source "ncSplice"; gene_biotype "protein_coding";
13	ncSplice	transcript	61137858	61152916	.	+	.	gene_id "ENSRNOG00000011063"; transcript_id "rnCircRNA-264"; gene_name "Dennd1b"; gene_biotype "protein_coding"; transcript_biotype "circRNA"; oId "ce:circDennd1b-1093-001|ts:circDennd1b-2032-002"; tissue "ce|ts";
13	ncSplice	exon	61137858	61137927	.	+	.	gene_id "ENSRNOG00000011063"; transcript_id "rnCircRNA-264"; exon_number "1" gene_name "Dennd1b"; gene_biotype "protein_coding"; oId "ce:circDennd1b-1093-001|ts:circDennd1b-2032-002"; tissue "ce|ts";
13	ncSplice	exon	61138681	61138761	.	+	.	gene_id "ENSRNOG00000011063"; transcript_id "rnCircRNA-264"; exon_number "2" gene_name "Dennd1b"; gene_biotype "protein_coding"; oId "ce:circDennd1b-1093-001|ts:circDennd1b-2032-002"; tissue "ce|ts";
13	ncSplice	exon	61145005	61145058	.	+	.	gene_id "ENSRNOG00000011063"; transcript_id "rnCircRNA-264"; exon_number "3" gene_name "Dennd1b"; gene_biotype "protein_coding"; oId "ce:circDennd1b-1093-001|ts:circDennd1b-2032-002"; tissue "ce|ts";
13	ncSplice	exon	61152806	61152916	.	+	.	gene_id "ENSRNOG00000011063"; transcript_id "rnCircRNA-264"; exon_number "4" gene_name "Dennd1b"; gene_biotype "protein_coding"; oId "ce:circDennd1b-1093-001|ts:circDennd1b-2032-002"; tissue "ce|ts";
13	ncSplice	gene	77222509	77281974	.	-	.	gene_id "ENSRNOG00000002863"; gene_name "Cacna1e"; gene_source "ncSplice"; gene_biotype "protein_coding";
13	ncSplice	transcript	77222509	77281974	.	-	.	gene_id "ENSRNOG00000002863"; transcript_id "rnCircRNA-265"; gene_name "Cacna1e"; gene_biotype "protein_coding"; transcript_biotype "circRNA"; oId "ce:circCacna1e-1106-001"; tissue "ce";
13	ncSplice	exon	77222509	77222645	.	-	.	gene_id "ENSRNOG00000002863"; transcript_id "rnCircRNA-265"; exon_number "1" gene_name "Cacna1e"; gene_biotype "protein_coding"; oId "ce:circCacna1e-1106-001"; tissue "ce";
13	ncSplice	exon	77280970	77281109	.	-	.	gene_id "ENSRNOG00000002863"; transcript_id "rnCircRNA-265"; exon_number "2" gene_name "Cacna1e"; gene_biotype "protein_coding"; oId "ce:circCacna1e-1106-001"; tissue "ce";
13	ncSplice	exon	77281870	77281974	.	-	.	gene_id "ENSRNOG00000002863"; transcript_id "rnCircRNA-265"; exon_number "3" gene_name "Cacna1e"; gene_biotype "protein_coding"; oId "ce:circCacna1e-1106-001"; tissue "ce";
13	ncSplice	gene	77222509	77281975	.	-	.	gene_id "ENSRNOG00000002863"; gene_name "Cacna1e"; gene_source "ncSplice"; gene_biotype "protein_coding";
13	ncSplice	transcript	77222509	77281975	.	-	.	gene_id "ENSRNOG00000002863"; transcript_id "rnCircRNA-266"; gene_name "Cacna1e"; gene_biotype "protein_coding"; transcript_biotype "circRNA"; oId "ce:circCacna1e-1107-001"; tissue "ce";
13	ncSplice	exon	77222509	77222645	.	-	.	gene_id "ENSRNOG00000002863"; transcript_id "rnCircRNA-266"; exon_number "1" gene_name "Cacna1e"; gene_biotype "protein_coding"; oId "ce:circCacna1e-1107-001"; tissue "ce";
13	ncSplice	exon	77280970	77281109	.	-	.	gene_id "ENSRNOG00000002863"; transcript_id "rnCircRNA-266"; exon_number "2" gene_name "Cacna1e"; gene_biotype "protein_coding"; oId "ce:circCacna1e-1107-001"; tissue "ce";
13	ncSplice	exon	77281870	77281975	.	-	.	gene_id "ENSRNOG00000002863"; transcript_id "rnCircRNA-266"; exon_number "3" gene_name "Cacna1e"; gene_biotype "protein_coding"; oId "ce:circCacna1e-1107-001"; tissue "ce";
13	ncSplice	gene	78137378	78199643	.	+	.	gene_id "ENSRNOG00000003550"; gene_name "Acbd6"; gene_source "ncSplice"; gene_biotype "protein_coding";
13	ncSplice	transcript	78137378	78199643	.	+	.	gene_id "ENSRNOG00000003550"; transcript_id "rnCircRNA-267"; gene_name "Acbd6"; gene_biotype "protein_coding"; transcript_biotype "circRNA"; oId "ce:circAcbd6-1111-001"; tissue "ce";
13	ncSplice	exon	78137378	78137442	.	+	.	gene_id "ENSRNOG00000003550"; transcript_id "rnCircRNA-267"; exon_number "1" gene_name "Acbd6"; gene_biotype "protein_coding"; oId "ce:circAcbd6-1111-001"; tissue "ce";
13	ncSplice	exon	78140405	78140501	.	+	.	gene_id "ENSRNOG00000003550"; transcript_id "rnCircRNA-267"; exon_number "2" gene_name "Acbd6"; gene_biotype "protein_coding"; oId "ce:circAcbd6-1111-001"; tissue "ce";
13	ncSplice	exon	78173652	78173734	.	+	.	gene_id "ENSRNOG00000003550"; transcript_id "rnCircRNA-267"; exon_number "3" gene_name "Acbd6"; gene_biotype "protein_coding"; oId "ce:circAcbd6-1111-001"; tissue "ce";
13	ncSplice	exon	78189067	78189172	.	+	.	gene_id "ENSRNOG00000003550"; transcript_id "rnCircRNA-267"; exon_number "4" gene_name "Acbd6"; gene_biotype "protein_coding"; oId "ce:circAcbd6-1111-001"; tissue "ce";
13	ncSplice	exon	78199554	78199643	.	+	.	gene_id "ENSRNOG00000003550"; transcript_id "rnCircRNA-267"; exon_number "5" gene_name "Acbd6"; gene_biotype "protein_coding"; oId "ce:circAcbd6-1111-001"; tissue "ce";
13	ncSplice	gene	78445230	78487087	.	-	.	gene_id "ENSRNOG00000003882"; gene_name "Cep350"; gene_source "ncSplice"; gene_biotype "protein_coding";
13	ncSplice	transcript	78445230	78487087	.	-	.	gene_id "ENSRNOG00000003882"; transcript_id "rnCircRNA-268"; gene_name "Cep350"; gene_biotype "protein_coding"; transcript_biotype "circRNA"; oId "ce:circCep350-1114-002"; tissue "ce";
13	ncSplice	exon	78445230	78445366	.	-	.	gene_id "ENSRNOG00000003882"; transcript_id "rnCircRNA-268"; exon_number "1" gene_name "Cep350"; gene_biotype "protein_coding"; oId "ce:circCep350-1114-002"; tissue "ce";
13	ncSplice	exon	78448238	78448398	.	-	.	gene_id "ENSRNOG00000003882"; transcript_id "rnCircRNA-268"; exon_number "2" gene_name "Cep350"; gene_biotype "protein_coding"; oId "ce:circCep350-1114-002"; tissue "ce";
13	ncSplice	exon	78451343	78451487	.	-	.	gene_id "ENSRNOG00000003882"; transcript_id "rnCircRNA-268"; exon_number "3" gene_name "Cep350"; gene_biotype "protein_coding"; oId "ce:circCep350-1114-002"; tissue "ce";
13	ncSplice	exon	78455195	78455403	.	-	.	gene_id "ENSRNOG00000003882"; transcript_id "rnCircRNA-268"; exon_number "4" gene_name "Cep350"; gene_biotype "protein_coding"; oId "ce:circCep350-1114-002"; tissue "ce";
13	ncSplice	exon	78460857	78462200	.	-	.	gene_id "ENSRNOG00000003882"; transcript_id "rnCircRNA-268"; exon_number "5" gene_name "Cep350"; gene_biotype "protein_coding"; oId "ce:circCep350-1114-002"; tissue "ce";
13	ncSplice	exon	78467678	78467832	.	-	.	gene_id "ENSRNOG00000003882"; transcript_id "rnCircRNA-268"; exon_number "6" gene_name "Cep350"; gene_biotype "protein_coding"; oId "ce:circCep350-1114-002"; tissue "ce";
13	ncSplice	exon	78470509	78470655	.	-	.	gene_id "ENSRNOG00000003882"; transcript_id "rnCircRNA-268"; exon_number "7" gene_name "Cep350"; gene_biotype "protein_coding"; oId "ce:circCep350-1114-002"; tissue "ce";
13	ncSplice	exon	78473405	78473492	.	-	.	gene_id "ENSRNOG00000003882"; transcript_id "rnCircRNA-268"; exon_number "8" gene_name "Cep350"; gene_biotype "protein_coding"; oId "ce:circCep350-1114-002"; tissue "ce";
13	ncSplice	exon	78474047	78474231	.	-	.	gene_id "ENSRNOG00000003882"; transcript_id "rnCircRNA-268"; exon_number "9" gene_name "Cep350"; gene_biotype "protein_coding"; oId "ce:circCep350-1114-002"; tissue "ce";
13	ncSplice	exon	78474872	78475068	.	-	.	gene_id "ENSRNOG00000003882"; transcript_id "rnCircRNA-268"; exon_number "10" gene_name "Cep350"; gene_biotype "protein_coding"; oId "ce:circCep350-1114-002"; tissue "ce";
13	ncSplice	exon	78478951	78479117	.	-	.	gene_id "ENSRNOG00000003882"; transcript_id "rnCircRNA-268"; exon_number "11" gene_name "Cep350"; gene_biotype "protein_coding"; oId "ce:circCep350-1114-002"; tissue "ce";
13	ncSplice	exon	78481505	78481630	.	-	.	gene_id "ENSRNOG00000003882"; transcript_id "rnCircRNA-268"; exon_number "12" gene_name "Cep350"; gene_biotype "protein_coding"; oId "ce:circCep350-1114-002"; tissue "ce";
13	ncSplice	exon	78482870	78483006	.	-	.	gene_id "ENSRNOG00000003882"; transcript_id "rnCircRNA-268"; exon_number "13" gene_name "Cep350"; gene_biotype "protein_coding"; oId "ce:circCep350-1114-002"; tissue "ce";
13	ncSplice	exon	78483397	78486286	.	-	.	gene_id "ENSRNOG00000003882"; transcript_id "rnCircRNA-268"; exon_number "14" gene_name "Cep350"; gene_biotype "protein_coding"; oId "ce:circCep350-1114-002"; tissue "ce";
13	ncSplice	exon	78486885	78487087	.	-	.	gene_id "ENSRNOG00000003882"; transcript_id "rnCircRNA-268"; exon_number "15" gene_name "Cep350"; gene_biotype "protein_coding"; oId "ce:circCep350-1114-002"; tissue "ce";
13	ncSplice	gene	83731472	83742296	.	-	.	gene_id "ENSRNOG00000026907"; gene_name "Zbtb37"; gene_source "ncSplice"; gene_biotype "protein_coding";
13	ncSplice	transcript	83731472	83742296	.	-	.	gene_id "ENSRNOG00000026907"; transcript_id "rnCircRNA-269"; gene_name "Zbtb37"; gene_biotype "protein_coding"; transcript_biotype "circRNA"; oId "ce:circZbtb37-1138-001"; tissue "ce";
13	ncSplice	exon	83731472	83732399	.	-	.	gene_id "ENSRNOG00000026907"; transcript_id "rnCircRNA-269"; exon_number "1" gene_name "Zbtb37"; gene_biotype "protein_coding"; oId "ce:circZbtb37-1138-001"; tissue "ce";
13	ncSplice	exon	83742197	83742296	.	-	.	gene_id "ENSRNOG00000026907"; transcript_id "rnCircRNA-269"; exon_number "2" gene_name "Zbtb37"; gene_biotype "protein_coding"; oId "ce:circZbtb37-1138-001"; tissue "ce";
13	ncSplice	gene	86971857	87037416	.	+	.	gene_id "ENSRNOG00000002544"; gene_name "Kifap3"; gene_source "ncSplice"; gene_biotype "protein_coding";
13	ncSplice	transcript	86971857	87037416	.	+	.	gene_id "ENSRNOG00000002544"; transcript_id "rnCircRNA-270"; gene_name "Kifap3"; gene_biotype "protein_coding"; transcript_biotype "circRNA"; oId "ce:circKifap3-1145-001"; tissue "ce";
13	ncSplice	exon	86971857	86971946	.	+	.	gene_id "ENSRNOG00000002544"; transcript_id "rnCircRNA-270"; exon_number "1" gene_name "Kifap3"; gene_biotype "protein_coding"; oId "ce:circKifap3-1145-001"; tissue "ce";
13	ncSplice	exon	86980095	86980273	.	+	.	gene_id "ENSRNOG00000002544"; transcript_id "rnCircRNA-270"; exon_number "2" gene_name "Kifap3"; gene_biotype "protein_coding"; oId "ce:circKifap3-1145-001"; tissue "ce";
13	ncSplice	exon	86984387	86984549	.	+	.	gene_id "ENSRNOG00000002544"; transcript_id "rnCircRNA-270"; exon_number "3" gene_name "Kifap3"; gene_biotype "protein_coding"; oId "ce:circKifap3-1145-001"; tissue "ce";
13	ncSplice	exon	87018713	87018813	.	+	.	gene_id "ENSRNOG00000002544"; transcript_id "rnCircRNA-270"; exon_number "4" gene_name "Kifap3"; gene_biotype "protein_coding"; oId "ce:circKifap3-1145-001"; tissue "ce";
13	ncSplice	exon	87026054	87026162	.	+	.	gene_id "ENSRNOG00000002544"; transcript_id "rnCircRNA-270"; exon_number "5" gene_name "Kifap3"; gene_biotype "protein_coding"; oId "ce:circKifap3-1145-001"; tissue "ce";
13	ncSplice	exon	87027457	87027569	.	+	.	gene_id "ENSRNOG00000002544"; transcript_id "rnCircRNA-270"; exon_number "6" gene_name "Kifap3"; gene_biotype "protein_coding"; oId "ce:circKifap3-1145-001"; tissue "ce";
13	ncSplice	exon	87033866	87034031	.	+	.	gene_id "ENSRNOG00000002544"; transcript_id "rnCircRNA-270"; exon_number "7" gene_name "Kifap3"; gene_biotype "protein_coding"; oId "ce:circKifap3-1145-001"; tissue "ce";
13	ncSplice	exon	87034809	87034934	.	+	.	gene_id "ENSRNOG00000002544"; transcript_id "rnCircRNA-270"; exon_number "8" gene_name "Kifap3"; gene_biotype "protein_coding"; oId "ce:circKifap3-1145-001"; tissue "ce";
13	ncSplice	exon	87037318	87037416	.	+	.	gene_id "ENSRNOG00000002544"; transcript_id "rnCircRNA-270"; exon_number "9" gene_name "Kifap3"; gene_biotype "protein_coding"; oId "ce:circKifap3-1145-001"; tissue "ce";
13	ncSplice	gene	88480615	88486497	.	-	.	gene_id "ENSRNOG00000003078"; gene_name "Dcaf6"; gene_source "ncSplice"; gene_biotype "protein_coding";
13	ncSplice	transcript	88480615	88486497	.	-	.	gene_id "ENSRNOG00000003078"; transcript_id "rnCircRNA-271"; gene_name "Dcaf6"; gene_biotype "protein_coding"; transcript_biotype "circRNA"; oId "ce:circDcaf6-1148-001"; tissue "ce";
13	ncSplice	exon	88480615	88480936	.	-	.	gene_id "ENSRNOG00000003078"; transcript_id "rnCircRNA-271"; exon_number "1" gene_name "Dcaf6"; gene_biotype "protein_coding"; oId "ce:circDcaf6-1148-001"; tissue "ce";
13	ncSplice	exon	88481152	88481220	.	-	.	gene_id "ENSRNOG00000003078"; transcript_id "rnCircRNA-271"; exon_number "2" gene_name "Dcaf6"; gene_biotype "protein_coding"; oId "ce:circDcaf6-1148-001"; tissue "ce";
13	ncSplice	exon	88481646	88481761	.	-	.	gene_id "ENSRNOG00000003078"; transcript_id "rnCircRNA-271"; exon_number "3" gene_name "Dcaf6"; gene_biotype "protein_coding"; oId "ce:circDcaf6-1148-001"; tissue "ce";
13	ncSplice	exon	88486380	88486497	.	-	.	gene_id "ENSRNOG00000003078"; transcript_id "rnCircRNA-271"; exon_number "4" gene_name "Dcaf6"; gene_biotype "protein_coding"; oId "ce:circDcaf6-1148-001"; tissue "ce";
13	ncSplice	gene	93776868	93789408	.	-	.	gene_id "ENSRNOG00000024632"; gene_name "Atf6"; gene_source "ncSplice"; gene_biotype "protein_coding";
13	ncSplice	transcript	93776868	93789408	.	-	.	gene_id "ENSRNOG00000024632"; transcript_id "rnCircRNA-272"; gene_name "Atf6"; gene_biotype "protein_coding"; transcript_biotype "circRNA"; oId "ce:circAtf6-1157-001|ts:circAtf6-2209-004"; tissue "ce|ts";
13	ncSplice	exon	93776868	93776982	.	-	.	gene_id "ENSRNOG00000024632"; transcript_id "rnCircRNA-272"; exon_number "1" gene_name "Atf6"; gene_biotype "protein_coding"; oId "ce:circAtf6-1157-001|ts:circAtf6-2209-004"; tissue "ce|ts";
13	ncSplice	exon	93778079	93778146	.	-	.	gene_id "ENSRNOG00000024632"; transcript_id "rnCircRNA-272"; exon_number "2" gene_name "Atf6"; gene_biotype "protein_coding"; oId "ce:circAtf6-1157-001|ts:circAtf6-2209-004"; tissue "ce|ts";
13	ncSplice	exon	93783158	93783257	.	-	.	gene_id "ENSRNOG00000024632"; transcript_id "rnCircRNA-272"; exon_number "3" gene_name "Atf6"; gene_biotype "protein_coding"; oId "ce:circAtf6-1157-001|ts:circAtf6-2209-004"; tissue "ce|ts";
13	ncSplice	exon	93783822	93783935	.	-	.	gene_id "ENSRNOG00000024632"; transcript_id "rnCircRNA-272"; exon_number "4" gene_name "Atf6"; gene_biotype "protein_coding"; oId "ce:circAtf6-1157-001|ts:circAtf6-2209-004"; tissue "ce|ts";
13	ncSplice	exon	93789277	93789408	.	-	.	gene_id "ENSRNOG00000024632"; transcript_id "rnCircRNA-272"; exon_number "5" gene_name "Atf6"; gene_biotype "protein_coding"; oId "ce:circAtf6-1157-001|ts:circAtf6-2209-004"; tissue "ce|ts";
13	ncSplice	gene	97108802	97118098	.	+	.	gene_id "ENSRNOG00000046471"; gene_name "Fmn2"; gene_source "ncSplice"; gene_biotype "protein_coding";
13	ncSplice	transcript	97108802	97118098	.	+	.	gene_id "ENSRNOG00000046471"; transcript_id "rnCircRNA-273"; gene_name "Fmn2"; gene_biotype "protein_coding"; transcript_biotype "circRNA"; oId "ce:circFmn2-1160-001"; tissue "ce";
13	ncSplice	exon	97108802	97108949	.	+	.	gene_id "ENSRNOG00000046471"; transcript_id "rnCircRNA-273"; exon_number "1" gene_name "Fmn2"; gene_biotype "protein_coding"; oId "ce:circFmn2-1160-001"; tissue "ce";
13	ncSplice	exon	97118043	97118098	.	+	.	gene_id "ENSRNOG00000046471"; transcript_id "rnCircRNA-273"; exon_number "2" gene_name "Fmn2"; gene_biotype "protein_coding"; oId "ce:circFmn2-1160-001"; tissue "ce";
13	ncSplice	gene	97623518	97649174	.	-	.	gene_id "ENSRNOG00000021984"; gene_name "Rgs7"; gene_source "ncSplice"; gene_biotype "protein_coding";
13	ncSplice	transcript	97623518	97649174	.	-	.	gene_id "ENSRNOG00000021984"; transcript_id "rnCircRNA-274"; gene_name "Rgs7"; gene_biotype "protein_coding"; transcript_biotype "circRNA"; oId "ce:circRgs7-1163-001"; tissue "ce";
13	ncSplice	exon	97623518	97623599	.	-	.	gene_id "ENSRNOG00000021984"; transcript_id "rnCircRNA-274"; exon_number "1" gene_name "Rgs7"; gene_biotype "protein_coding"; oId "ce:circRgs7-1163-001"; tissue "ce";
13	ncSplice	exon	97623703	97623779	.	-	.	gene_id "ENSRNOG00000021984"; transcript_id "rnCircRNA-274"; exon_number "2" gene_name "Rgs7"; gene_biotype "protein_coding"; oId "ce:circRgs7-1163-001"; tissue "ce";
13	ncSplice	exon	97624735	97624799	.	-	.	gene_id "ENSRNOG00000021984"; transcript_id "rnCircRNA-274"; exon_number "3" gene_name "Rgs7"; gene_biotype "protein_coding"; oId "ce:circRgs7-1163-001"; tissue "ce";
13	ncSplice	exon	97645437	97645488	.	-	.	gene_id "ENSRNOG00000021984"; transcript_id "rnCircRNA-274"; exon_number "4" gene_name "Rgs7"; gene_biotype "protein_coding"; oId "ce:circRgs7-1163-001"; tissue "ce";
13	ncSplice	exon	97649068	97649174	.	-	.	gene_id "ENSRNOG00000021984"; transcript_id "rnCircRNA-274"; exon_number "5" gene_name "Rgs7"; gene_biotype "protein_coding"; oId "ce:circRgs7-1163-001"; tissue "ce";
13	ncSplice	gene	99351287	99393387	.	+	.	gene_id "ENSRNOG00000004181"; gene_name "Sdccag8"; gene_source "ncSplice"; gene_biotype "protein_coding";
13	ncSplice	transcript	99351287	99393387	.	+	.	gene_id "ENSRNOG00000004181"; transcript_id "rnCircRNA-275"; gene_name "Sdccag8"; gene_biotype "protein_coding"; transcript_biotype "circRNA"; oId "ce:circSdccag8-1164-001"; tissue "ce";
13	ncSplice	exon	99351287	99351439	.	+	.	gene_id "ENSRNOG00000004181"; transcript_id "rnCircRNA-275"; exon_number "1" gene_name "Sdccag8"; gene_biotype "protein_coding"; oId "ce:circSdccag8-1164-001"; tissue "ce";
13	ncSplice	exon	99352777	99352859	.	+	.	gene_id "ENSRNOG00000004181"; transcript_id "rnCircRNA-275"; exon_number "2" gene_name "Sdccag8"; gene_biotype "protein_coding"; oId "ce:circSdccag8-1164-001"; tissue "ce";
13	ncSplice	exon	99355474	99355587	.	+	.	gene_id "ENSRNOG00000004181"; transcript_id "rnCircRNA-275"; exon_number "3" gene_name "Sdccag8"; gene_biotype "protein_coding"; oId "ce:circSdccag8-1164-001"; tissue "ce";
13	ncSplice	exon	99357686	99357811	.	+	.	gene_id "ENSRNOG00000004181"; transcript_id "rnCircRNA-275"; exon_number "4" gene_name "Sdccag8"; gene_biotype "protein_coding"; oId "ce:circSdccag8-1164-001"; tissue "ce";
13	ncSplice	exon	99362745	99362885	.	+	.	gene_id "ENSRNOG00000004181"; transcript_id "rnCircRNA-275"; exon_number "5" gene_name "Sdccag8"; gene_biotype "protein_coding"; oId "ce:circSdccag8-1164-001"; tissue "ce";
13	ncSplice	exon	99366487	99366551	.	+	.	gene_id "ENSRNOG00000004181"; transcript_id "rnCircRNA-275"; exon_number "6" gene_name "Sdccag8"; gene_biotype "protein_coding"; oId "ce:circSdccag8-1164-001"; tissue "ce";
13	ncSplice	exon	99366837	99367025	.	+	.	gene_id "ENSRNOG00000004181"; transcript_id "rnCircRNA-275"; exon_number "7" gene_name "Sdccag8"; gene_biotype "protein_coding"; oId "ce:circSdccag8-1164-001"; tissue "ce";
13	ncSplice	exon	99374800	99374938	.	+	.	gene_id "ENSRNOG00000004181"; transcript_id "rnCircRNA-275"; exon_number "8" gene_name "Sdccag8"; gene_biotype "protein_coding"; oId "ce:circSdccag8-1164-001"; tissue "ce";
13	ncSplice	exon	99383963	99384115	.	+	.	gene_id "ENSRNOG00000004181"; transcript_id "rnCircRNA-275"; exon_number "9" gene_name "Sdccag8"; gene_biotype "protein_coding"; oId "ce:circSdccag8-1164-001"; tissue "ce";
13	ncSplice	exon	99390017	99390151	.	+	.	gene_id "ENSRNOG00000004181"; transcript_id "rnCircRNA-275"; exon_number "10" gene_name "Sdccag8"; gene_biotype "protein_coding"; oId "ce:circSdccag8-1164-001"; tissue "ce";
13	ncSplice	exon	99393271	99393387	.	+	.	gene_id "ENSRNOG00000004181"; transcript_id "rnCircRNA-275"; exon_number "11" gene_name "Sdccag8"; gene_biotype "protein_coding"; oId "ce:circSdccag8-1164-001"; tissue "ce";
13	ncSplice	gene	99456437	99466067	.	+	.	gene_id "ENSRNOG00000004181"; gene_name "Sdccag8"; gene_source "ncSplice"; gene_biotype "protein_coding";
13	ncSplice	transcript	99456437	99466067	.	+	.	gene_id "ENSRNOG00000004181"; transcript_id "rnCircRNA-276"; gene_name "Sdccag8"; gene_biotype "protein_coding"; transcript_biotype "circRNA"; oId "ce:circSdccag8-1168-001"; tissue "ce";
13	ncSplice	exon	99456437	99456564	.	+	.	gene_id "ENSRNOG00000004181"; transcript_id "rnCircRNA-276"; exon_number "1" gene_name "Sdccag8"; gene_biotype "protein_coding"; oId "ce:circSdccag8-1168-001"; tissue "ce";
13	ncSplice	exon	99458589	99458697	.	+	.	gene_id "ENSRNOG00000004181"; transcript_id "rnCircRNA-276"; exon_number "2" gene_name "Sdccag8"; gene_biotype "protein_coding"; oId "ce:circSdccag8-1168-001"; tissue "ce";
13	ncSplice	exon	99465936	99466067	.	+	.	gene_id "ENSRNOG00000004181"; transcript_id "rnCircRNA-276"; exon_number "3" gene_name "Sdccag8"; gene_biotype "protein_coding"; oId "ce:circSdccag8-1168-001"; tissue "ce";
13	ncSplice	gene	99619555	99648138	.	-	.	gene_id "ENSRNOG00000021497"; gene_name "Akt3"; gene_source "ncSplice"; gene_biotype "protein_coding";
13	ncSplice	transcript	99619555	99648138	.	-	.	gene_id "ENSRNOG00000021497"; transcript_id "rnCircRNA-277"; gene_name "Akt3"; gene_biotype "protein_coding"; transcript_biotype "circRNA"; oId "ce:circAkt3-1176-001"; tissue "ce";
13	ncSplice	exon	99619555	99619623	.	-	.	gene_id "ENSRNOG00000021497"; transcript_id "rnCircRNA-277"; exon_number "1" gene_name "Akt3"; gene_biotype "protein_coding"; oId "ce:circAkt3-1176-001"; tissue "ce";
13	ncSplice	exon	99620968	99621033	.	-	.	gene_id "ENSRNOG00000021497"; transcript_id "rnCircRNA-277"; exon_number "2" gene_name "Akt3"; gene_biotype "protein_coding"; oId "ce:circAkt3-1176-001"; tissue "ce";
13	ncSplice	exon	99644745	99644876	.	-	.	gene_id "ENSRNOG00000021497"; transcript_id "rnCircRNA-277"; exon_number "3" gene_name "Akt3"; gene_biotype "protein_coding"; oId "ce:circAkt3-1176-001"; tissue "ce";
13	ncSplice	exon	99647994	99648138	.	-	.	gene_id "ENSRNOG00000021497"; transcript_id "rnCircRNA-277"; exon_number "4" gene_name "Akt3"; gene_biotype "protein_coding"; oId "ce:circAkt3-1176-001"; tissue "ce";
13	ncSplice	gene	99619555	99660065	.	-	.	gene_id "ENSRNOG00000021497"; gene_name "Akt3"; gene_source "ncSplice"; gene_biotype "protein_coding";
13	ncSplice	transcript	99619555	99660065	.	-	.	gene_id "ENSRNOG00000021497"; transcript_id "rnCircRNA-278"; gene_name "Akt3"; gene_biotype "protein_coding"; transcript_biotype "circRNA"; oId "ce:circAkt3-1177-001|ts:circAkt3-2256-023"; tissue "ce|ts";
13	ncSplice	exon	99619555	99619623	.	-	.	gene_id "ENSRNOG00000021497"; transcript_id "rnCircRNA-278"; exon_number "1" gene_name "Akt3"; gene_biotype "protein_coding"; oId "ce:circAkt3-1177-001|ts:circAkt3-2256-023"; tissue "ce|ts";
13	ncSplice	exon	99620968	99621033	.	-	.	gene_id "ENSRNOG00000021497"; transcript_id "rnCircRNA-278"; exon_number "2" gene_name "Akt3"; gene_biotype "protein_coding"; oId "ce:circAkt3-1177-001|ts:circAkt3-2256-023"; tissue "ce|ts";
13	ncSplice	exon	99644745	99644876	.	-	.	gene_id "ENSRNOG00000021497"; transcript_id "rnCircRNA-278"; exon_number "3" gene_name "Akt3"; gene_biotype "protein_coding"; oId "ce:circAkt3-1177-001|ts:circAkt3-2256-023"; tissue "ce|ts";
13	ncSplice	exon	99647994	99648138	.	-	.	gene_id "ENSRNOG00000021497"; transcript_id "rnCircRNA-278"; exon_number "4" gene_name "Akt3"; gene_biotype "protein_coding"; oId "ce:circAkt3-1177-001|ts:circAkt3-2256-023"; tissue "ce|ts";
13	ncSplice	exon	99659954	99660065	.	-	.	gene_id "ENSRNOG00000021497"; transcript_id "rnCircRNA-278"; exon_number "5" gene_name "Akt3"; gene_biotype "protein_coding"; oId "ce:circAkt3-1177-001|ts:circAkt3-2256-023"; tissue "ce|ts";
13	ncSplice	gene	99644745	99648138	.	-	.	gene_id "ENSRNOG00000021497"; gene_name "Akt3"; gene_source "ncSplice"; gene_biotype "protein_coding";
13	ncSplice	transcript	99644745	99648138	.	-	.	gene_id "ENSRNOG00000021497"; transcript_id "rnCircRNA-279"; gene_name "Akt3"; gene_biotype "protein_coding"; transcript_biotype "circRNA"; oId "ce:circAkt3-1178-001"; tissue "ce";
13	ncSplice	exon	99644745	99644876	.	-	.	gene_id "ENSRNOG00000021497"; transcript_id "rnCircRNA-279"; exon_number "1" gene_name "Akt3"; gene_biotype "protein_coding"; oId "ce:circAkt3-1178-001"; tissue "ce";
13	ncSplice	exon	99647994	99648138	.	-	.	gene_id "ENSRNOG00000021497"; transcript_id "rnCircRNA-279"; exon_number "2" gene_name "Akt3"; gene_biotype "protein_coding"; oId "ce:circAkt3-1178-001"; tissue "ce";
13	ncSplice	gene	99644745	99660065	.	-	.	gene_id "ENSRNOG00000021497"; gene_name "Akt3"; gene_source "ncSplice"; gene_biotype "protein_coding";
13	ncSplice	transcript	99644745	99660065	.	-	.	gene_id "ENSRNOG00000021497"; transcript_id "rnCircRNA-280"; gene_name "Akt3"; gene_biotype "protein_coding"; transcript_biotype "circRNA"; oId "ce:circAkt3-1179-001"; tissue "ce";
13	ncSplice	exon	99644745	99644876	.	-	.	gene_id "ENSRNOG00000021497"; transcript_id "rnCircRNA-280"; exon_number "1" gene_name "Akt3"; gene_biotype "protein_coding"; oId "ce:circAkt3-1179-001"; tissue "ce";
13	ncSplice	exon	99647994	99648138	.	-	.	gene_id "ENSRNOG00000021497"; transcript_id "rnCircRNA-280"; exon_number "2" gene_name "Akt3"; gene_biotype "protein_coding"; oId "ce:circAkt3-1179-001"; tissue "ce";
13	ncSplice	exon	99659954	99660065	.	-	.	gene_id "ENSRNOG00000021497"; transcript_id "rnCircRNA-280"; exon_number "3" gene_name "Akt3"; gene_biotype "protein_coding"; oId "ce:circAkt3-1179-001"; tissue "ce";
14	ncSplice	gene	104002472	104011512	.	+	.	gene_id "ENSRNOG00000004888"; gene_name "Spred2"; gene_source "ncSplice"; gene_biotype "protein_coding";
14	ncSplice	transcript	104002472	104011512	.	+	.	gene_id "ENSRNOG00000004888"; transcript_id "rnCircRNA-281"; gene_name "Spred2"; gene_biotype "protein_coding"; transcript_biotype "circRNA"; oId "ce:circSpred2-1184-001"; tissue "ce";
14	ncSplice	exon	104002472	104002649	.	+	.	gene_id "ENSRNOG00000004888"; transcript_id "rnCircRNA-281"; exon_number "1" gene_name "Spred2"; gene_biotype "protein_coding"; oId "ce:circSpred2-1184-001"; tissue "ce";
14	ncSplice	exon	104008969	104009137	.	+	.	gene_id "ENSRNOG00000004888"; transcript_id "rnCircRNA-281"; exon_number "2" gene_name "Spred2"; gene_biotype "protein_coding"; oId "ce:circSpred2-1184-001"; tissue "ce";
14	ncSplice	exon	104011448	104011512	.	+	.	gene_id "ENSRNOG00000004888"; transcript_id "rnCircRNA-281"; exon_number "3" gene_name "Spred2"; gene_biotype "protein_coding"; oId "ce:circSpred2-1184-001"; tissue "ce";
14	ncSplice	gene	106986642	107072981	.	-	.	gene_id "ENSRNOG00000008917"; gene_name "Ehbp1"; gene_source "ncSplice"; gene_biotype "protein_coding";
14	ncSplice	transcript	106986642	107072981	.	-	.	gene_id "ENSRNOG00000008917"; transcript_id "rnCircRNA-282"; gene_name "Ehbp1"; gene_biotype "protein_coding"; transcript_biotype "circRNA"; oId "ce:circEhbp1-1198-001"; tissue "ce";
14	ncSplice	exon	106986642	106986766	.	-	.	gene_id "ENSRNOG00000008917"; transcript_id "rnCircRNA-282"; exon_number "1" gene_name "Ehbp1"; gene_biotype "protein_coding"; oId "ce:circEhbp1-1198-001"; tissue "ce";
14	ncSplice	exon	106990297	106990404	.	-	.	gene_id "ENSRNOG00000008917"; transcript_id "rnCircRNA-282"; exon_number "2" gene_name "Ehbp1"; gene_biotype "protein_coding"; oId "ce:circEhbp1-1198-001"; tissue "ce";
14	ncSplice	exon	106995935	106996082	.	-	.	gene_id "ENSRNOG00000008917"; transcript_id "rnCircRNA-282"; exon_number "3" gene_name "Ehbp1"; gene_biotype "protein_coding"; oId "ce:circEhbp1-1198-001"; tissue "ce";
14	ncSplice	exon	107016517	107016660	.	-	.	gene_id "ENSRNOG00000008917"; transcript_id "rnCircRNA-282"; exon_number "4" gene_name "Ehbp1"; gene_biotype "protein_coding"; oId "ce:circEhbp1-1198-001"; tissue "ce";
14	ncSplice	exon	107022201	107023085	.	-	.	gene_id "ENSRNOG00000008917"; transcript_id "rnCircRNA-282"; exon_number "5" gene_name "Ehbp1"; gene_biotype "protein_coding"; oId "ce:circEhbp1-1198-001"; tissue "ce";
14	ncSplice	exon	107027040	107027088	.	-	.	gene_id "ENSRNOG00000008917"; transcript_id "rnCircRNA-282"; exon_number "6" gene_name "Ehbp1"; gene_biotype "protein_coding"; oId "ce:circEhbp1-1198-001"; tissue "ce";
14	ncSplice	exon	107027669	107027847	.	-	.	gene_id "ENSRNOG00000008917"; transcript_id "rnCircRNA-282"; exon_number "7" gene_name "Ehbp1"; gene_biotype "protein_coding"; oId "ce:circEhbp1-1198-001"; tissue "ce";
14	ncSplice	exon	107058921	107059125	.	-	.	gene_id "ENSRNOG00000008917"; transcript_id "rnCircRNA-282"; exon_number "8" gene_name "Ehbp1"; gene_biotype "protein_coding"; oId "ce:circEhbp1-1198-001"; tissue "ce";
14	ncSplice	exon	107068442	107068679	.	-	.	gene_id "ENSRNOG00000008917"; transcript_id "rnCircRNA-282"; exon_number "9" gene_name "Ehbp1"; gene_biotype "protein_coding"; oId "ce:circEhbp1-1198-001"; tissue "ce";
14	ncSplice	exon	107072859	107072981	.	-	.	gene_id "ENSRNOG00000008917"; transcript_id "rnCircRNA-282"; exon_number "10" gene_name "Ehbp1"; gene_biotype "protein_coding"; oId "ce:circEhbp1-1198-001"; tissue "ce";
14	ncSplice	gene	20657080	20676799	.	-	.	gene_id "ENSRNOG00000003134"; gene_name "Slc4a4"; gene_source "ncSplice"; gene_biotype "protein_coding";
14	ncSplice	transcript	20657080	20676799	.	-	.	gene_id "ENSRNOG00000003134"; transcript_id "rnCircRNA-283"; gene_name "Slc4a4"; gene_biotype "protein_coding"; transcript_biotype "circRNA"; oId "ce:circSlc4a4-1240-001"; tissue "ce";
14	ncSplice	exon	20657080	20657259	.	-	.	gene_id "ENSRNOG00000003134"; transcript_id "rnCircRNA-283"; exon_number "1" gene_name "Slc4a4"; gene_biotype "protein_coding"; oId "ce:circSlc4a4-1240-001"; tissue "ce";
14	ncSplice	exon	20676726	20676799	.	-	.	gene_id "ENSRNOG00000003134"; transcript_id "rnCircRNA-283"; exon_number "2" gene_name "Slc4a4"; gene_biotype "protein_coding"; oId "ce:circSlc4a4-1240-001"; tissue "ce";
14	ncSplice	gene	2944523	2956274	.	+	.	gene_id "ENSRNOG00000002039"; gene_name "Evi5"; gene_source "ncSplice"; gene_biotype "protein_coding";
14	ncSplice	transcript	2944523	2956274	.	+	.	gene_id "ENSRNOG00000002039"; transcript_id "rnCircRNA-284"; gene_name "Evi5"; gene_biotype "protein_coding"; transcript_biotype "circRNA"; oId "ce:circEvi5-1261-001"; tissue "ce";
14	ncSplice	exon	2944523	2944712	.	+	.	gene_id "ENSRNOG00000002039"; transcript_id "rnCircRNA-284"; exon_number "1" gene_name "Evi5"; gene_biotype "protein_coding"; oId "ce:circEvi5-1261-001"; tissue "ce";
14	ncSplice	exon	2945286	2945510	.	+	.	gene_id "ENSRNOG00000002039"; transcript_id "rnCircRNA-284"; exon_number "2" gene_name "Evi5"; gene_biotype "protein_coding"; oId "ce:circEvi5-1261-001"; tissue "ce";
14	ncSplice	exon	2946384	2946458	.	+	.	gene_id "ENSRNOG00000002039"; transcript_id "rnCircRNA-284"; exon_number "3" gene_name "Evi5"; gene_biotype "protein_coding"; oId "ce:circEvi5-1261-001"; tissue "ce";
14	ncSplice	exon	2950894	2951019	.	+	.	gene_id "ENSRNOG00000002039"; transcript_id "rnCircRNA-284"; exon_number "4" gene_name "Evi5"; gene_biotype "protein_coding"; oId "ce:circEvi5-1261-001"; tissue "ce";
14	ncSplice	exon	2952917	2953060	.	+	.	gene_id "ENSRNOG00000002039"; transcript_id "rnCircRNA-284"; exon_number "5" gene_name "Evi5"; gene_biotype "protein_coding"; oId "ce:circEvi5-1261-001"; tissue "ce";
14	ncSplice	exon	2953889	2953978	.	+	.	gene_id "ENSRNOG00000002039"; transcript_id "rnCircRNA-284"; exon_number "6" gene_name "Evi5"; gene_biotype "protein_coding"; oId "ce:circEvi5-1261-001"; tissue "ce";
14	ncSplice	exon	2954071	2956274	.	+	.	gene_id "ENSRNOG00000002039"; transcript_id "rnCircRNA-284"; exon_number "7" gene_name "Evi5"; gene_biotype "protein_coding"; oId "ce:circEvi5-1261-001"; tissue "ce";
14	ncSplice	gene	37051096	37076465	.	-	.	gene_id "ENSRNOG00000002152"; gene_name "Dcun1d4"; gene_source "ncSplice"; gene_biotype "protein_coding";
14	ncSplice	transcript	37051096	37076465	.	-	.	gene_id "ENSRNOG00000002152"; transcript_id "rnCircRNA-285"; gene_name "Dcun1d4"; gene_biotype "protein_coding"; transcript_biotype "circRNA"; oId "ce:circDcun1d4-1279-001"; tissue "ce";
14	ncSplice	exon	37051096	37051204	.	-	.	gene_id "ENSRNOG00000002152"; transcript_id "rnCircRNA-285"; exon_number "1" gene_name "Dcun1d4"; gene_biotype "protein_coding"; oId "ce:circDcun1d4-1279-001"; tissue "ce";
14	ncSplice	exon	37060969	37061060	.	-	.	gene_id "ENSRNOG00000002152"; transcript_id "rnCircRNA-285"; exon_number "2" gene_name "Dcun1d4"; gene_biotype "protein_coding"; oId "ce:circDcun1d4-1279-001"; tissue "ce";
14	ncSplice	exon	37064073	37064143	.	-	.	gene_id "ENSRNOG00000002152"; transcript_id "rnCircRNA-285"; exon_number "3" gene_name "Dcun1d4"; gene_biotype "protein_coding"; oId "ce:circDcun1d4-1279-001"; tissue "ce";
14	ncSplice	exon	37073750	37073841	.	-	.	gene_id "ENSRNOG00000002152"; transcript_id "rnCircRNA-285"; exon_number "4" gene_name "Dcun1d4"; gene_biotype "protein_coding"; oId "ce:circDcun1d4-1279-001"; tissue "ce";
14	ncSplice	exon	37076351	37076465	.	-	.	gene_id "ENSRNOG00000002152"; transcript_id "rnCircRNA-285"; exon_number "5" gene_name "Dcun1d4"; gene_biotype "protein_coding"; oId "ce:circDcun1d4-1279-001"; tissue "ce";
14	ncSplice	gene	37051096	37084547	.	-	.	gene_id "ENSRNOG00000002152"; gene_name "Dcun1d4"; gene_source "ncSplice"; gene_biotype "protein_coding";
14	ncSplice	transcript	37051096	37084547	.	-	.	gene_id "ENSRNOG00000002152"; transcript_id "rnCircRNA-286"; gene_name "Dcun1d4"; gene_biotype "protein_coding"; transcript_biotype "circRNA"; oId "ce:circDcun1d4-1280-001"; tissue "ce";
14	ncSplice	exon	37051096	37051204	.	-	.	gene_id "ENSRNOG00000002152"; transcript_id "rnCircRNA-286"; exon_number "1" gene_name "Dcun1d4"; gene_biotype "protein_coding"; oId "ce:circDcun1d4-1280-001"; tissue "ce";
14	ncSplice	exon	37060969	37061060	.	-	.	gene_id "ENSRNOG00000002152"; transcript_id "rnCircRNA-286"; exon_number "2" gene_name "Dcun1d4"; gene_biotype "protein_coding"; oId "ce:circDcun1d4-1280-001"; tissue "ce";
14	ncSplice	exon	37064073	37064143	.	-	.	gene_id "ENSRNOG00000002152"; transcript_id "rnCircRNA-286"; exon_number "3" gene_name "Dcun1d4"; gene_biotype "protein_coding"; oId "ce:circDcun1d4-1280-001"; tissue "ce";
14	ncSplice	exon	37073750	37073841	.	-	.	gene_id "ENSRNOG00000002152"; transcript_id "rnCircRNA-286"; exon_number "4" gene_name "Dcun1d4"; gene_biotype "protein_coding"; oId "ce:circDcun1d4-1280-001"; tissue "ce";
14	ncSplice	exon	37076351	37076465	.	-	.	gene_id "ENSRNOG00000002152"; transcript_id "rnCircRNA-286"; exon_number "5" gene_name "Dcun1d4"; gene_biotype "protein_coding"; oId "ce:circDcun1d4-1280-001"; tissue "ce";
14	ncSplice	exon	37084266	37084305	.	-	.	gene_id "ENSRNOG00000002152"; transcript_id "rnCircRNA-286"; exon_number "6" gene_name "Dcun1d4"; gene_biotype "protein_coding"; oId "ce:circDcun1d4-1280-001"; tissue "ce";
14	ncSplice	exon	37084477	37084547	.	-	.	gene_id "ENSRNOG00000002152"; transcript_id "rnCircRNA-286"; exon_number "7" gene_name "Dcun1d4"; gene_biotype "protein_coding"; oId "ce:circDcun1d4-1280-001"; tissue "ce";
14	ncSplice	gene	37060969	37084547	.	-	.	gene_id "ENSRNOG00000002152"; gene_name "Dcun1d4"; gene_source "ncSplice"; gene_biotype "protein_coding";
14	ncSplice	transcript	37060969	37084547	.	-	.	gene_id "ENSRNOG00000002152"; transcript_id "rnCircRNA-287"; gene_name "Dcun1d4"; gene_biotype "protein_coding"; transcript_biotype "circRNA"; oId "ce:circDcun1d4-1283-001"; tissue "ce";
14	ncSplice	exon	37060969	37061060	.	-	.	gene_id "ENSRNOG00000002152"; transcript_id "rnCircRNA-287"; exon_number "1" gene_name "Dcun1d4"; gene_biotype "protein_coding"; oId "ce:circDcun1d4-1283-001"; tissue "ce";
14	ncSplice	exon	37064073	37064143	.	-	.	gene_id "ENSRNOG00000002152"; transcript_id "rnCircRNA-287"; exon_number "2" gene_name "Dcun1d4"; gene_biotype "protein_coding"; oId "ce:circDcun1d4-1283-001"; tissue "ce";
14	ncSplice	exon	37073750	37073841	.	-	.	gene_id "ENSRNOG00000002152"; transcript_id "rnCircRNA-287"; exon_number "3" gene_name "Dcun1d4"; gene_biotype "protein_coding"; oId "ce:circDcun1d4-1283-001"; tissue "ce";
14	ncSplice	exon	37076351	37076465	.	-	.	gene_id "ENSRNOG00000002152"; transcript_id "rnCircRNA-287"; exon_number "4" gene_name "Dcun1d4"; gene_biotype "protein_coding"; oId "ce:circDcun1d4-1283-001"; tissue "ce";
14	ncSplice	exon	37084266	37084305	.	-	.	gene_id "ENSRNOG00000002152"; transcript_id "rnCircRNA-287"; exon_number "5" gene_name "Dcun1d4"; gene_biotype "protein_coding"; oId "ce:circDcun1d4-1283-001"; tissue "ce";
14	ncSplice	exon	37084477	37084547	.	-	.	gene_id "ENSRNOG00000002152"; transcript_id "rnCircRNA-287"; exon_number "6" gene_name "Dcun1d4"; gene_biotype "protein_coding"; oId "ce:circDcun1d4-1283-001"; tissue "ce";
1	ncSplice	gene	43839349	43861739	.	-	.	gene_id "ENSRNOG00000018690"; gene_name "Rgs17"; gene_source "ncSplice"; gene_biotype "protein_coding";
1	ncSplice	transcript	43839349	43861739	.	-	.	gene_id "ENSRNOG00000018690"; transcript_id "rnCircRNA-288"; gene_name "Rgs17"; gene_biotype "protein_coding"; transcript_biotype "circRNA"; oId "ce:circRgs17-1285-001"; tissue "ce";
1	ncSplice	exon	43839349	43839583	.	-	.	gene_id "ENSRNOG00000018690"; transcript_id "rnCircRNA-288"; exon_number "1" gene_name "Rgs17"; gene_biotype "protein_coding"; oId "ce:circRgs17-1285-001"; tissue "ce";
1	ncSplice	exon	43841582	43841671	.	-	.	gene_id "ENSRNOG00000018690"; transcript_id "rnCircRNA-288"; exon_number "2" gene_name "Rgs17"; gene_biotype "protein_coding"; oId "ce:circRgs17-1285-001"; tissue "ce";
1	ncSplice	exon	43861596	43861739	.	-	.	gene_id "ENSRNOG00000018690"; transcript_id "rnCircRNA-288"; exon_number "3" gene_name "Rgs17"; gene_biotype "protein_coding"; oId "ce:circRgs17-1285-001"; tissue "ce";
14	ncSplice	gene	4174198	4177998	.	+	.	gene_id "ENSRNOG00000002112"; gene_name "Zfp644"; gene_source "ncSplice"; gene_biotype "protein_coding";
14	ncSplice	transcript	4174198	4177998	.	+	.	gene_id "ENSRNOG00000002112"; transcript_id "rnCircRNA-289"; gene_name "Zfp644"; gene_biotype "protein_coding"; transcript_biotype "circRNA"; oId "ce:circZfp644-1289-001"; tissue "ce";
14	ncSplice	exon	4174198	4176410	.	+	.	gene_id "ENSRNOG00000002112"; transcript_id "rnCircRNA-289"; exon_number "1" gene_name "Zfp644"; gene_biotype "protein_coding"; oId "ce:circZfp644-1289-001"; tissue "ce";
14	ncSplice	exon	4176507	4177217	.	+	.	gene_id "ENSRNOG00000002112"; transcript_id "rnCircRNA-289"; exon_number "2" gene_name "Zfp644"; gene_biotype "protein_coding"; oId "ce:circZfp644-1289-001"; tissue "ce";
14	ncSplice	exon	4177393	4177998	.	+	.	gene_id "ENSRNOG00000002112"; transcript_id "rnCircRNA-289"; exon_number "3" gene_name "Zfp644"; gene_biotype "protein_coding"; oId "ce:circZfp644-1289-001"; tissue "ce";
14	ncSplice	gene	41877019	41921849	.	+	.	gene_id "ENSRNOG00000034200"; gene_name "Atp8a1"; gene_source "ncSplice"; gene_biotype "protein_coding";
14	ncSplice	transcript	41877019	41921849	.	+	.	gene_id "ENSRNOG00000034200"; transcript_id "rnCircRNA-290"; gene_name "Atp8a1"; gene_biotype "protein_coding"; transcript_biotype "circRNA"; oId "ce:circAtp8a1-1293-001"; tissue "ce";
14	ncSplice	exon	41877019	41877091	.	+	.	gene_id "ENSRNOG00000034200"; transcript_id "rnCircRNA-290"; exon_number "1" gene_name "Atp8a1"; gene_biotype "protein_coding"; oId "ce:circAtp8a1-1293-001"; tissue "ce";
14	ncSplice	exon	41878972	41879077	.	+	.	gene_id "ENSRNOG00000034200"; transcript_id "rnCircRNA-290"; exon_number "2" gene_name "Atp8a1"; gene_biotype "protein_coding"; oId "ce:circAtp8a1-1293-001"; tissue "ce";
14	ncSplice	exon	41880220	41880302	.	+	.	gene_id "ENSRNOG00000034200"; transcript_id "rnCircRNA-290"; exon_number "3" gene_name "Atp8a1"; gene_biotype "protein_coding"; oId "ce:circAtp8a1-1293-001"; tissue "ce";
14	ncSplice	exon	41882609	41882658	.	+	.	gene_id "ENSRNOG00000034200"; transcript_id "rnCircRNA-290"; exon_number "4" gene_name "Atp8a1"; gene_biotype "protein_coding"; oId "ce:circAtp8a1-1293-001"; tissue "ce";
14	ncSplice	exon	41887468	41887537	.	+	.	gene_id "ENSRNOG00000034200"; transcript_id "rnCircRNA-290"; exon_number "5" gene_name "Atp8a1"; gene_biotype "protein_coding"; oId "ce:circAtp8a1-1293-001"; tissue "ce";
14	ncSplice	exon	41900052	41900136	.	+	.	gene_id "ENSRNOG00000034200"; transcript_id "rnCircRNA-290"; exon_number "6" gene_name "Atp8a1"; gene_biotype "protein_coding"; oId "ce:circAtp8a1-1293-001"; tissue "ce";
14	ncSplice	exon	41901838	41901977	.	+	.	gene_id "ENSRNOG00000034200"; transcript_id "rnCircRNA-290"; exon_number "7" gene_name "Atp8a1"; gene_biotype "protein_coding"; oId "ce:circAtp8a1-1293-001"; tissue "ce";
14	ncSplice	exon	41916549	41916687	.	+	.	gene_id "ENSRNOG00000034200"; transcript_id "rnCircRNA-290"; exon_number "8" gene_name "Atp8a1"; gene_biotype "protein_coding"; oId "ce:circAtp8a1-1293-001"; tissue "ce";
14	ncSplice	exon	41921785	41921849	.	+	.	gene_id "ENSRNOG00000034200"; transcript_id "rnCircRNA-290"; exon_number "9" gene_name "Atp8a1"; gene_biotype "protein_coding"; oId "ce:circAtp8a1-1293-001"; tissue "ce";
14	ncSplice	gene	44259814	44276270	.	+	.	gene_id "ENSRNOG00000002553"; gene_name "Smim14"; gene_source "ncSplice"; gene_biotype "protein_coding";
14	ncSplice	transcript	44259814	44276270	.	+	.	gene_id "ENSRNOG00000002553"; transcript_id "rnCircRNA-291"; gene_name "Smim14"; gene_biotype "protein_coding"; transcript_biotype "circRNA"; oId "ce:circSmim14-1302-001"; tissue "ce";
14	ncSplice	exon	44259814	44266627	.	+	.	gene_id "ENSRNOG00000002553"; transcript_id "rnCircRNA-291"; exon_number "1" gene_name "Smim14"; gene_biotype "protein_coding"; oId "ce:circSmim14-1302-001"; tissue "ce";
14	ncSplice	exon	44273607	44276270	.	+	.	gene_id "ENSRNOG00000002553"; transcript_id "rnCircRNA-291"; exon_number "2" gene_name "Smim14"; gene_biotype "protein_coding"; oId "ce:circSmim14-1302-001"; tissue "ce";
14	ncSplice	gene	45474305	45489227	.	-	.	gene_id "ENSRNOG00000002180"; gene_name "Tbc1d1"; gene_source "ncSplice"; gene_biotype "protein_coding";
14	ncSplice	transcript	45474305	45489227	.	-	.	gene_id "ENSRNOG00000002180"; transcript_id "rnCircRNA-292"; gene_name "Tbc1d1"; gene_biotype "protein_coding"; transcript_biotype "circRNA"; oId "ce:circTbc1d1-1305-001"; tissue "ce";
14	ncSplice	exon	45474305	45474444	.	-	.	gene_id "ENSRNOG00000002180"; transcript_id "rnCircRNA-292"; exon_number "1" gene_name "Tbc1d1"; gene_biotype "protein_coding"; oId "ce:circTbc1d1-1305-001"; tissue "ce";
14	ncSplice	exon	45475581	45475700	.	-	.	gene_id "ENSRNOG00000002180"; transcript_id "rnCircRNA-292"; exon_number "2" gene_name "Tbc1d1"; gene_biotype "protein_coding"; oId "ce:circTbc1d1-1305-001"; tissue "ce";
14	ncSplice	exon	45476275	45476439	.	-	.	gene_id "ENSRNOG00000002180"; transcript_id "rnCircRNA-292"; exon_number "3" gene_name "Tbc1d1"; gene_biotype "protein_coding"; oId "ce:circTbc1d1-1305-001"; tissue "ce";
14	ncSplice	exon	45478427	45478707	.	-	.	gene_id "ENSRNOG00000002180"; transcript_id "rnCircRNA-292"; exon_number "4" gene_name "Tbc1d1"; gene_biotype "protein_coding"; oId "ce:circTbc1d1-1305-001"; tissue "ce";
14	ncSplice	exon	45481374	45481460	.	-	.	gene_id "ENSRNOG00000002180"; transcript_id "rnCircRNA-292"; exon_number "5" gene_name "Tbc1d1"; gene_biotype "protein_coding"; oId "ce:circTbc1d1-1305-001"; tissue "ce";
14	ncSplice	exon	45482745	45482873	.	-	.	gene_id "ENSRNOG00000002180"; transcript_id "rnCircRNA-292"; exon_number "6" gene_name "Tbc1d1"; gene_biotype "protein_coding"; oId "ce:circTbc1d1-1305-001"; tissue "ce";
14	ncSplice	exon	45485176	45485286	.	-	.	gene_id "ENSRNOG00000002180"; transcript_id "rnCircRNA-292"; exon_number "7" gene_name "Tbc1d1"; gene_biotype "protein_coding"; oId "ce:circTbc1d1-1305-001"; tissue "ce";
14	ncSplice	exon	45489136	45489227	.	-	.	gene_id "ENSRNOG00000002180"; transcript_id "rnCircRNA-292"; exon_number "8" gene_name "Tbc1d1"; gene_biotype "protein_coding"; oId "ce:circTbc1d1-1305-001"; tissue "ce";
1	ncSplice	gene	45153035	45161354	.	-	.	gene_id "ENSRNOG00000018052"; gene_name "Cnksr3"; gene_source "ncSplice"; gene_biotype "protein_coding";
1	ncSplice	transcript	45153035	45161354	.	-	.	gene_id "ENSRNOG00000018052"; transcript_id "rnCircRNA-293"; gene_name "Cnksr3"; gene_biotype "protein_coding"; transcript_biotype "circRNA"; oId "ce:circCnksr3-1316-001"; tissue "ce";
1	ncSplice	exon	45153035	45153122	.	-	.	gene_id "ENSRNOG00000018052"; transcript_id "rnCircRNA-293"; exon_number "1" gene_name "Cnksr3"; gene_biotype "protein_coding"; oId "ce:circCnksr3-1316-001"; tissue "ce";
1	ncSplice	exon	45154235	45154437	.	-	.	gene_id "ENSRNOG00000018052"; transcript_id "rnCircRNA-293"; exon_number "2" gene_name "Cnksr3"; gene_biotype "protein_coding"; oId "ce:circCnksr3-1316-001"; tissue "ce";
1	ncSplice	exon	45161191	45161354	.	-	.	gene_id "ENSRNOG00000018052"; transcript_id "rnCircRNA-293"; exon_number "3" gene_name "Cnksr3"; gene_biotype "protein_coding"; oId "ce:circCnksr3-1316-001"; tissue "ce";
14	ncSplice	gene	60310304	60324150	.	+	.	gene_id "ENSRNOG00000004932"; gene_name "Sel1l3"; gene_source "ncSplice"; gene_biotype "protein_coding";
14	ncSplice	transcript	60310304	60324150	.	+	.	gene_id "ENSRNOG00000004932"; transcript_id "rnCircRNA-294"; gene_name "Sel1l3"; gene_biotype "protein_coding"; transcript_biotype "circRNA"; oId "ce:circSel1l3-1323-001"; tissue "ce";
14	ncSplice	exon	60310304	60310423	.	+	.	gene_id "ENSRNOG00000004932"; transcript_id "rnCircRNA-294"; exon_number "1" gene_name "Sel1l3"; gene_biotype "protein_coding"; oId "ce:circSel1l3-1323-001"; tissue "ce";
14	ncSplice	exon	60311621	60311761	.	+	.	gene_id "ENSRNOG00000004932"; transcript_id "rnCircRNA-294"; exon_number "2" gene_name "Sel1l3"; gene_biotype "protein_coding"; oId "ce:circSel1l3-1323-001"; tissue "ce";
14	ncSplice	exon	60316101	60316163	.	+	.	gene_id "ENSRNOG00000004932"; transcript_id "rnCircRNA-294"; exon_number "3" gene_name "Sel1l3"; gene_biotype "protein_coding"; oId "ce:circSel1l3-1323-001"; tissue "ce";
14	ncSplice	exon	60318802	60318978	.	+	.	gene_id "ENSRNOG00000004932"; transcript_id "rnCircRNA-294"; exon_number "4" gene_name "Sel1l3"; gene_biotype "protein_coding"; oId "ce:circSel1l3-1323-001"; tissue "ce";
14	ncSplice	exon	60320091	60320218	.	+	.	gene_id "ENSRNOG00000004932"; transcript_id "rnCircRNA-294"; exon_number "5" gene_name "Sel1l3"; gene_biotype "protein_coding"; oId "ce:circSel1l3-1323-001"; tissue "ce";
14	ncSplice	exon	60324067	60324150	.	+	.	gene_id "ENSRNOG00000004932"; transcript_id "rnCircRNA-294"; exon_number "6" gene_name "Sel1l3"; gene_biotype "protein_coding"; oId "ce:circSel1l3-1323-001"; tissue "ce";
14	ncSplice	gene	69844169	69863273	.	+	.	gene_id "ENSRNOG00000003787"; gene_name "Lcorl"; gene_source "ncSplice"; gene_biotype "protein_coding";
14	ncSplice	transcript	69844169	69863273	.	+	.	gene_id "ENSRNOG00000003787"; transcript_id "rnCircRNA-295"; gene_name "Lcorl"; gene_biotype "protein_coding"; transcript_biotype "circRNA"; oId "ce:circLcorl-1331-001|ts:circLcorl-2504-038"; tissue "ce|ts";
14	ncSplice	exon	69844169	69844234	.	+	.	gene_id "ENSRNOG00000003787"; transcript_id "rnCircRNA-295"; exon_number "1" gene_name "Lcorl"; gene_biotype "protein_coding"; oId "ce:circLcorl-1331-001|ts:circLcorl-2504-038"; tissue "ce|ts";
14	ncSplice	exon	69862137	69862216	.	+	.	gene_id "ENSRNOG00000003787"; transcript_id "rnCircRNA-295"; exon_number "2" gene_name "Lcorl"; gene_biotype "protein_coding"; oId "ce:circLcorl-1331-001|ts:circLcorl-2504-038"; tissue "ce|ts";
14	ncSplice	exon	69863144	69863273	.	+	.	gene_id "ENSRNOG00000003787"; transcript_id "rnCircRNA-295"; exon_number "3" gene_name "Lcorl"; gene_biotype "protein_coding"; oId "ce:circLcorl-1331-001|ts:circLcorl-2504-038"; tissue "ce|ts";
14	ncSplice	gene	7176432	7180435	.	+	.	gene_id "ENSRNOG00000002214"; gene_name "Klhl8"; gene_source "ncSplice"; gene_biotype "protein_coding";
14	ncSplice	transcript	7176432	7180435	.	+	.	gene_id "ENSRNOG00000002214"; transcript_id "rnCircRNA-296"; gene_name "Klhl8"; gene_biotype "protein_coding"; transcript_biotype "circRNA"; oId "ce:circKlhl8-1333-001|ts:circKlhl8-2508-001"; tissue "ce|ts";
14	ncSplice	exon	7176432	7176492	.	+	.	gene_id "ENSRNOG00000002214"; transcript_id "rnCircRNA-296"; exon_number "1" gene_name "Klhl8"; gene_biotype "protein_coding"; oId "ce:circKlhl8-1333-001|ts:circKlhl8-2508-001"; tissue "ce|ts";
14	ncSplice	exon	7180068	7180435	.	+	.	gene_id "ENSRNOG00000002214"; transcript_id "rnCircRNA-296"; exon_number "2" gene_name "Klhl8"; gene_biotype "protein_coding"; oId "ce:circKlhl8-1333-001|ts:circKlhl8-2508-001"; tissue "ce|ts";
14	ncSplice	gene	71889205	71905496	.	+	.	gene_id "ENSRNOG00000005261"; gene_name "Fbxl5"; gene_source "ncSplice"; gene_biotype "protein_coding";
14	ncSplice	transcript	71889205	71905496	.	+	.	gene_id "ENSRNOG00000005261"; transcript_id "rnCircRNA-297"; gene_name "Fbxl5"; gene_biotype "protein_coding"; transcript_biotype "circRNA"; oId "ce:circFbxl5-1334-001|ts:circFbxl5-2510-003"; tissue "ce|ts";
14	ncSplice	exon	71889205	71889420	.	+	.	gene_id "ENSRNOG00000005261"; transcript_id "rnCircRNA-297"; exon_number "1" gene_name "Fbxl5"; gene_biotype "protein_coding"; oId "ce:circFbxl5-1334-001|ts:circFbxl5-2510-003"; tissue "ce|ts";
14	ncSplice	exon	71892396	71892491	.	+	.	gene_id "ENSRNOG00000005261"; transcript_id "rnCircRNA-297"; exon_number "2" gene_name "Fbxl5"; gene_biotype "protein_coding"; oId "ce:circFbxl5-1334-001|ts:circFbxl5-2510-003"; tissue "ce|ts";
14	ncSplice	exon	71894732	71894918	.	+	.	gene_id "ENSRNOG00000005261"; transcript_id "rnCircRNA-297"; exon_number "3" gene_name "Fbxl5"; gene_biotype "protein_coding"; oId "ce:circFbxl5-1334-001|ts:circFbxl5-2510-003"; tissue "ce|ts";
14	ncSplice	exon	71898143	71898325	.	+	.	gene_id "ENSRNOG00000005261"; transcript_id "rnCircRNA-297"; exon_number "4" gene_name "Fbxl5"; gene_biotype "protein_coding"; oId "ce:circFbxl5-1334-001|ts:circFbxl5-2510-003"; tissue "ce|ts";
14	ncSplice	exon	71900636	71900761	.	+	.	gene_id "ENSRNOG00000005261"; transcript_id "rnCircRNA-297"; exon_number "5" gene_name "Fbxl5"; gene_biotype "protein_coding"; oId "ce:circFbxl5-1334-001|ts:circFbxl5-2510-003"; tissue "ce|ts";
14	ncSplice	exon	71902766	71902914	.	+	.	gene_id "ENSRNOG00000005261"; transcript_id "rnCircRNA-297"; exon_number "6" gene_name "Fbxl5"; gene_biotype "protein_coding"; oId "ce:circFbxl5-1334-001|ts:circFbxl5-2510-003"; tissue "ce|ts";
14	ncSplice	exon	71904799	71905496	.	+	.	gene_id "ENSRNOG00000005261"; transcript_id "rnCircRNA-297"; exon_number "7" gene_name "Fbxl5"; gene_biotype "protein_coding"; oId "ce:circFbxl5-1334-001|ts:circFbxl5-2510-003"; tissue "ce|ts";
14	ncSplice	gene	71889205	71912441	.	+	.	gene_id "ENSRNOG00000005261"; gene_name "Fbxl5"; gene_source "ncSplice"; gene_biotype "protein_coding";
14	ncSplice	transcript	71889205	71912441	.	+	.	gene_id "ENSRNOG00000005261"; transcript_id "rnCircRNA-298"; gene_name "Fbxl5"; gene_biotype "protein_coding"; transcript_biotype "circRNA"; oId "ce:circFbxl5-1335-001|ts:circFbxl5-2511-003"; tissue "ce|ts";
14	ncSplice	exon	71889205	71889420	.	+	.	gene_id "ENSRNOG00000005261"; transcript_id "rnCircRNA-298"; exon_number "1" gene_name "Fbxl5"; gene_biotype "protein_coding"; oId "ce:circFbxl5-1335-001|ts:circFbxl5-2511-003"; tissue "ce|ts";
14	ncSplice	exon	71892396	71892491	.	+	.	gene_id "ENSRNOG00000005261"; transcript_id "rnCircRNA-298"; exon_number "2" gene_name "Fbxl5"; gene_biotype "protein_coding"; oId "ce:circFbxl5-1335-001|ts:circFbxl5-2511-003"; tissue "ce|ts";
14	ncSplice	exon	71894732	71894918	.	+	.	gene_id "ENSRNOG00000005261"; transcript_id "rnCircRNA-298"; exon_number "3" gene_name "Fbxl5"; gene_biotype "protein_coding"; oId "ce:circFbxl5-1335-001|ts:circFbxl5-2511-003"; tissue "ce|ts";
14	ncSplice	exon	71898143	71898325	.	+	.	gene_id "ENSRNOG00000005261"; transcript_id "rnCircRNA-298"; exon_number "4" gene_name "Fbxl5"; gene_biotype "protein_coding"; oId "ce:circFbxl5-1335-001|ts:circFbxl5-2511-003"; tissue "ce|ts";
14	ncSplice	exon	71900636	71900761	.	+	.	gene_id "ENSRNOG00000005261"; transcript_id "rnCircRNA-298"; exon_number "5" gene_name "Fbxl5"; gene_biotype "protein_coding"; oId "ce:circFbxl5-1335-001|ts:circFbxl5-2511-003"; tissue "ce|ts";
14	ncSplice	exon	71902766	71902914	.	+	.	gene_id "ENSRNOG00000005261"; transcript_id "rnCircRNA-298"; exon_number "6" gene_name "Fbxl5"; gene_biotype "protein_coding"; oId "ce:circFbxl5-1335-001|ts:circFbxl5-2511-003"; tissue "ce|ts";
14	ncSplice	exon	71904799	71912441	.	+	.	gene_id "ENSRNOG00000005261"; transcript_id "rnCircRNA-298"; exon_number "7" gene_name "Fbxl5"; gene_biotype "protein_coding"; oId "ce:circFbxl5-1335-001|ts:circFbxl5-2511-003"; tissue "ce|ts";
1	ncSplice	gene	47239551	47329332	.	+	.	gene_id "ENSRNOG00000017030"; gene_name "Arid1b"; gene_source "ncSplice"; gene_biotype "protein_coding";
1	ncSplice	transcript	47239551	47329332	.	+	.	gene_id "ENSRNOG00000017030"; transcript_id "rnCircRNA-299"; gene_name "Arid1b"; gene_biotype "protein_coding"; transcript_biotype "circRNA"; oId "ce:circArid1b-1337-001|ts:circArid1b-2515-009"; tissue "ce|ts";
1	ncSplice	exon	47239551	47239745	.	+	.	gene_id "ENSRNOG00000017030"; transcript_id "rnCircRNA-299"; exon_number "1" gene_name "Arid1b"; gene_biotype "protein_coding"; oId "ce:circArid1b-1337-001|ts:circArid1b-2515-009"; tissue "ce|ts";
1	ncSplice	exon	47298461	47298610	.	+	.	gene_id "ENSRNOG00000017030"; transcript_id "rnCircRNA-299"; exon_number "2" gene_name "Arid1b"; gene_biotype "protein_coding"; oId "ce:circArid1b-1337-001|ts:circArid1b-2515-009"; tissue "ce|ts";
1	ncSplice	exon	47329222	47329332	.	+	.	gene_id "ENSRNOG00000017030"; transcript_id "rnCircRNA-299"; exon_number "3" gene_name "Arid1b"; gene_biotype "protein_coding"; oId "ce:circArid1b-1337-001|ts:circArid1b-2515-009"; tissue "ce|ts";
14	ncSplice	gene	80962931	80992446	.	+	.	gene_id "ENSRNOG00000008276"; gene_name "Adcy1"; gene_source "ncSplice"; gene_biotype "protein_coding";
14	ncSplice	transcript	80962931	80992446	.	+	.	gene_id "ENSRNOG00000008276"; transcript_id "rnCircRNA-300"; gene_name "Adcy1"; gene_biotype "protein_coding"; transcript_biotype "circRNA"; oId "ce:circAdcy1-1341-001"; tissue "ce";
14	ncSplice	exon	80962931	80963080	.	+	.	gene_id "ENSRNOG00000008276"; transcript_id "rnCircRNA-300"; exon_number "1" gene_name "Adcy1"; gene_biotype "protein_coding"; oId "ce:circAdcy1-1341-001"; tissue "ce";
14	ncSplice	exon	80985011	80985129	.	+	.	gene_id "ENSRNOG00000008276"; transcript_id "rnCircRNA-300"; exon_number "2" gene_name "Adcy1"; gene_biotype "protein_coding"; oId "ce:circAdcy1-1341-001"; tissue "ce";
14	ncSplice	exon	80992335	80992446	.	+	.	gene_id "ENSRNOG00000008276"; transcript_id "rnCircRNA-300"; exon_number "3" gene_name "Adcy1"; gene_biotype "protein_coding"; oId "ce:circAdcy1-1341-001"; tissue "ce";
14	ncSplice	gene	81852393	81871115	.	-	.	gene_id "ENSRNOG00000011073"; gene_name "Htt"; gene_source "ncSplice"; gene_biotype "protein_coding";
14	ncSplice	transcript	81852393	81871115	.	-	.	gene_id "ENSRNOG00000011073"; transcript_id "rnCircRNA-301"; gene_name "Htt"; gene_biotype "protein_coding"; transcript_biotype "circRNA"; oId "ce:circHtt-1347-001"; tissue "ce";
14	ncSplice	exon	81852393	81852554	.	-	.	gene_id "ENSRNOG00000011073"; transcript_id "rnCircRNA-301"; exon_number "1" gene_name "Htt"; gene_biotype "protein_coding"; oId "ce:circHtt-1347-001"; tissue "ce";
14	ncSplice	exon	81852682	81852760	.	-	.	gene_id "ENSRNOG00000011073"; transcript_id "rnCircRNA-301"; exon_number "2" gene_name "Htt"; gene_biotype "protein_coding"; oId "ce:circHtt-1347-001"; tissue "ce";
14	ncSplice	exon	81853736	81853959	.	-	.	gene_id "ENSRNOG00000011073"; transcript_id "rnCircRNA-301"; exon_number "3" gene_name "Htt"; gene_biotype "protein_coding"; oId "ce:circHtt-1347-001"; tissue "ce";
14	ncSplice	exon	81855321	81855398	.	-	.	gene_id "ENSRNOG00000011073"; transcript_id "rnCircRNA-301"; exon_number "4" gene_name "Htt"; gene_biotype "protein_coding"; oId "ce:circHtt-1347-001"; tissue "ce";
14	ncSplice	exon	81858484	81858594	.	-	.	gene_id "ENSRNOG00000011073"; transcript_id "rnCircRNA-301"; exon_number "5" gene_name "Htt"; gene_biotype "protein_coding"; oId "ce:circHtt-1347-001"; tissue "ce";
14	ncSplice	exon	81869370	81869497	.	-	.	gene_id "ENSRNOG00000011073"; transcript_id "rnCircRNA-301"; exon_number "6" gene_name "Htt"; gene_biotype "protein_coding"; oId "ce:circHtt-1347-001"; tissue "ce";
14	ncSplice	exon	81870989	81871115	.	-	.	gene_id "ENSRNOG00000011073"; transcript_id "rnCircRNA-301"; exon_number "7" gene_name "Htt"; gene_biotype "protein_coding"; oId "ce:circHtt-1347-001"; tissue "ce";
14	ncSplice	gene	82852829	82855886	.	-	.	gene_id "ENSRNOG00000038140"; gene_name "LOC686349"; gene_source "ncSplice"; gene_biotype "protein_coding";
14	ncSplice	transcript	82852829	82855886	.	-	.	gene_id "ENSRNOG00000038140"; transcript_id "rnCircRNA-302"; gene_name "LOC686349"; gene_biotype "protein_coding"; transcript_biotype "circRNA"; oId "ce:circLOC686349-1356-001|ts:circLOC686349-2582-001"; tissue "ce|ts";
14	ncSplice	exon	82852829	82852991	.	-	.	gene_id "ENSRNOG00000038140"; transcript_id "rnCircRNA-302"; exon_number "1" gene_name "LOC686349"; gene_biotype "protein_coding"; oId "ce:circLOC686349-1356-001|ts:circLOC686349-2582-001"; tissue "ce|ts";
14	ncSplice	exon	82855261	82855886	.	-	.	gene_id "ENSRNOG00000038140"; transcript_id "rnCircRNA-302"; exon_number "2" gene_name "LOC686349"; gene_biotype "protein_coding"; oId "ce:circLOC686349-1356-001|ts:circLOC686349-2582-001"; tissue "ce|ts";
14	ncSplice	gene	83946988	83949254	.	+	.	gene_id "ENSRNOG00000048891"; gene_name "Prr14l"; gene_source "ncSplice"; gene_biotype "protein_coding";
14	ncSplice	transcript	83946988	83949254	.	+	.	gene_id "ENSRNOG00000048891"; transcript_id "rnCircRNA-303"; gene_name "Prr14l"; gene_biotype "protein_coding"; transcript_biotype "circRNA"; oId "ce:circPrr14l-1360-001"; tissue "ce";
14	ncSplice	exon	83946988	83947059	.	+	.	gene_id "ENSRNOG00000048891"; transcript_id "rnCircRNA-303"; exon_number "1" gene_name "Prr14l"; gene_biotype "protein_coding"; oId "ce:circPrr14l-1360-001"; tissue "ce";
14	ncSplice	exon	83948346	83948517	.	+	.	gene_id "ENSRNOG00000048891"; transcript_id "rnCircRNA-303"; exon_number "2" gene_name "Prr14l"; gene_biotype "protein_coding"; oId "ce:circPrr14l-1360-001"; tissue "ce";
14	ncSplice	exon	83949148	83949254	.	+	.	gene_id "ENSRNOG00000048891"; transcript_id "rnCircRNA-303"; exon_number "3" gene_name "Prr14l"; gene_biotype "protein_coding"; oId "ce:circPrr14l-1360-001"; tissue "ce";
14	ncSplice	gene	84275534	84276175	.	-	.	gene_id "ENSRNOG00000019000"; gene_name "Limk2"; gene_source "ncSplice"; gene_biotype "protein_coding";
14	ncSplice	transcript	84275534	84276175	.	-	.	gene_id "ENSRNOG00000019000"; transcript_id "rnCircRNA-304"; gene_name "Limk2"; gene_biotype "protein_coding"; transcript_biotype "circRNA"; oId "ce:circLimk2-1362-001"; tissue "ce";
14	ncSplice	exon	84275534	84275730	.	-	.	gene_id "ENSRNOG00000019000"; transcript_id "rnCircRNA-304"; exon_number "1" gene_name "Limk2"; gene_biotype "protein_coding"; oId "ce:circLimk2-1362-001"; tissue "ce";
14	ncSplice	exon	84276070	84276175	.	-	.	gene_id "ENSRNOG00000019000"; transcript_id "rnCircRNA-304"; exon_number "2" gene_name "Limk2"; gene_biotype "protein_coding"; oId "ce:circLimk2-1362-001"; tissue "ce";
15	ncSplice	gene	112502388	112523503	.	+	.	gene_id "ENSRNOG00000014146"; gene_name "Pcca"; gene_source "ncSplice"; gene_biotype "protein_coding";
15	ncSplice	transcript	112502388	112523503	.	+	.	gene_id "ENSRNOG00000014146"; transcript_id "rnCircRNA-305"; gene_name "Pcca"; gene_biotype "protein_coding"; transcript_biotype "circRNA"; oId "ce:circPcca-1388-001"; tissue "ce";
15	ncSplice	exon	112502388	112502531	.	+	.	gene_id "ENSRNOG00000014146"; transcript_id "rnCircRNA-305"; exon_number "1" gene_name "Pcca"; gene_biotype "protein_coding"; oId "ce:circPcca-1388-001"; tissue "ce";
15	ncSplice	exon	112503586	112503660	.	+	.	gene_id "ENSRNOG00000014146"; transcript_id "rnCircRNA-305"; exon_number "2" gene_name "Pcca"; gene_biotype "protein_coding"; oId "ce:circPcca-1388-001"; tissue "ce";
15	ncSplice	exon	112507769	112509558	.	+	.	gene_id "ENSRNOG00000014146"; transcript_id "rnCircRNA-305"; exon_number "3" gene_name "Pcca"; gene_biotype "protein_coding"; oId "ce:circPcca-1388-001"; tissue "ce";
15	ncSplice	exon	112509642	112509717	.	+	.	gene_id "ENSRNOG00000014146"; transcript_id "rnCircRNA-305"; exon_number "4" gene_name "Pcca"; gene_biotype "protein_coding"; oId "ce:circPcca-1388-001"; tissue "ce";
15	ncSplice	exon	112517601	112517711	.	+	.	gene_id "ENSRNOG00000014146"; transcript_id "rnCircRNA-305"; exon_number "5" gene_name "Pcca"; gene_biotype "protein_coding"; oId "ce:circPcca-1388-001"; tissue "ce";
15	ncSplice	exon	112523401	112523503	.	+	.	gene_id "ENSRNOG00000014146"; transcript_id "rnCircRNA-305"; exon_number "6" gene_name "Pcca"; gene_biotype "protein_coding"; oId "ce:circPcca-1388-001"; tissue "ce";
15	ncSplice	gene	113416126	113426238	.	-	.	gene_id "ENSRNOG00000004752"; gene_name "Nalcn"; gene_source "ncSplice"; gene_biotype "protein_coding";
15	ncSplice	transcript	113416126	113426238	.	-	.	gene_id "ENSRNOG00000004752"; transcript_id "rnCircRNA-306"; gene_name "Nalcn"; gene_biotype "protein_coding"; transcript_biotype "circRNA"; oId "ce:circNalcn-1396-001"; tissue "ce";
15	ncSplice	exon	113416126	113416254	.	-	.	gene_id "ENSRNOG00000004752"; transcript_id "rnCircRNA-306"; exon_number "1" gene_name "Nalcn"; gene_biotype "protein_coding"; oId "ce:circNalcn-1396-001"; tissue "ce";
15	ncSplice	exon	113416352	113416491	.	-	.	gene_id "ENSRNOG00000004752"; transcript_id "rnCircRNA-306"; exon_number "2" gene_name "Nalcn"; gene_biotype "protein_coding"; oId "ce:circNalcn-1396-001"; tissue "ce";
15	ncSplice	exon	113417462	113417545	.	-	.	gene_id "ENSRNOG00000004752"; transcript_id "rnCircRNA-306"; exon_number "3" gene_name "Nalcn"; gene_biotype "protein_coding"; oId "ce:circNalcn-1396-001"; tissue "ce";
15	ncSplice	exon	113422726	113422908	.	-	.	gene_id "ENSRNOG00000004752"; transcript_id "rnCircRNA-306"; exon_number "4" gene_name "Nalcn"; gene_biotype "protein_coding"; oId "ce:circNalcn-1396-001"; tissue "ce";
15	ncSplice	exon	113426092	113426238	.	-	.	gene_id "ENSRNOG00000004752"; transcript_id "rnCircRNA-306"; exon_number "5" gene_name "Nalcn"; gene_biotype "protein_coding"; oId "ce:circNalcn-1396-001"; tissue "ce";
15	ncSplice	gene	19652666	19669172	.	+	.	gene_id "ENSRNOG00000008570"; gene_name "Cadps"; gene_source "ncSplice"; gene_biotype "protein_coding";
15	ncSplice	transcript	19652666	19669172	.	+	.	gene_id "ENSRNOG00000008570"; transcript_id "rnCircRNA-307"; gene_name "Cadps"; gene_biotype "protein_coding"; transcript_biotype "circRNA"; oId "ce:circCadps-1407-001"; tissue "ce";
15	ncSplice	exon	19652666	19656355	.	+	.	gene_id "ENSRNOG00000008570"; transcript_id "rnCircRNA-307"; exon_number "1" gene_name "Cadps"; gene_biotype "protein_coding"; oId "ce:circCadps-1407-001"; tissue "ce";
15	ncSplice	exon	19660204	19660352	.	+	.	gene_id "ENSRNOG00000008570"; transcript_id "rnCircRNA-307"; exon_number "2" gene_name "Cadps"; gene_biotype "protein_coding"; oId "ce:circCadps-1407-001"; tissue "ce";
15	ncSplice	exon	19668121	19668195	.	+	.	gene_id "ENSRNOG00000008570"; transcript_id "rnCircRNA-307"; exon_number "3" gene_name "Cadps"; gene_biotype "protein_coding"; oId "ce:circCadps-1407-001"; tissue "ce";
15	ncSplice	exon	19669089	19669172	.	+	.	gene_id "ENSRNOG00000008570"; transcript_id "rnCircRNA-307"; exon_number "4" gene_name "Cadps"; gene_biotype "protein_coding"; oId "ce:circCadps-1407-001"; tissue "ce";
15	ncSplice	gene	23499705	23507168	.	-	.	gene_id "ENSRNOG00000006334"; gene_name "Txndc16"; gene_source "ncSplice"; gene_biotype "protein_coding";
15	ncSplice	transcript	23499705	23507168	.	-	.	gene_id "ENSRNOG00000006334"; transcript_id "rnCircRNA-308"; gene_name "Txndc16"; gene_biotype "protein_coding"; transcript_biotype "circRNA"; oId "ce:circTxndc16-1412-001"; tissue "ce";
15	ncSplice	exon	23499705	23499779	.	-	.	gene_id "ENSRNOG00000006334"; transcript_id "rnCircRNA-308"; exon_number "1" gene_name "Txndc16"; gene_biotype "protein_coding"; oId "ce:circTxndc16-1412-001"; tissue "ce";
15	ncSplice	exon	23500493	23500566	.	-	.	gene_id "ENSRNOG00000006334"; transcript_id "rnCircRNA-308"; exon_number "2" gene_name "Txndc16"; gene_biotype "protein_coding"; oId "ce:circTxndc16-1412-001"; tissue "ce";
15	ncSplice	exon	23505009	23505091	.	-	.	gene_id "ENSRNOG00000006334"; transcript_id "rnCircRNA-308"; exon_number "3" gene_name "Txndc16"; gene_biotype "protein_coding"; oId "ce:circTxndc16-1412-001"; tissue "ce";
15	ncSplice	exon	23506929	23507168	.	-	.	gene_id "ENSRNOG00000006334"; transcript_id "rnCircRNA-308"; exon_number "4" gene_name "Txndc16"; gene_biotype "protein_coding"; oId "ce:circTxndc16-1412-001"; tissue "ce";
15	ncSplice	gene	27965171	27973144	.	-	.	gene_id "ENSRNOG00000011167"; gene_name "Wdhd1"; gene_source "ncSplice"; gene_biotype "protein_coding";
15	ncSplice	transcript	27965171	27973144	.	-	.	gene_id "ENSRNOG00000011167"; transcript_id "rnCircRNA-309"; gene_name "Wdhd1"; gene_biotype "protein_coding"; transcript_biotype "circRNA"; oId "ce:circWdhd1-1421-001"; tissue "ce";
15	ncSplice	exon	27965171	27965309	.	-	.	gene_id "ENSRNOG00000011167"; transcript_id "rnCircRNA-309"; exon_number "1" gene_name "Wdhd1"; gene_biotype "protein_coding"; oId "ce:circWdhd1-1421-001"; tissue "ce";
15	ncSplice	exon	27966302	27966429	.	-	.	gene_id "ENSRNOG00000011167"; transcript_id "rnCircRNA-309"; exon_number "2" gene_name "Wdhd1"; gene_biotype "protein_coding"; oId "ce:circWdhd1-1421-001"; tissue "ce";
15	ncSplice	exon	27966573	27966743	.	-	.	gene_id "ENSRNOG00000011167"; transcript_id "rnCircRNA-309"; exon_number "3" gene_name "Wdhd1"; gene_biotype "protein_coding"; oId "ce:circWdhd1-1421-001"; tissue "ce";
15	ncSplice	exon	27967078	27967121	.	-	.	gene_id "ENSRNOG00000011167"; transcript_id "rnCircRNA-309"; exon_number "4" gene_name "Wdhd1"; gene_biotype "protein_coding"; oId "ce:circWdhd1-1421-001"; tissue "ce";
15	ncSplice	exon	27968717	27968770	.	-	.	gene_id "ENSRNOG00000011167"; transcript_id "rnCircRNA-309"; exon_number "5" gene_name "Wdhd1"; gene_biotype "protein_coding"; oId "ce:circWdhd1-1421-001"; tissue "ce";
15	ncSplice	exon	27969132	27969247	.	-	.	gene_id "ENSRNOG00000011167"; transcript_id "rnCircRNA-309"; exon_number "6" gene_name "Wdhd1"; gene_biotype "protein_coding"; oId "ce:circWdhd1-1421-001"; tissue "ce";
15	ncSplice	exon	27969345	27969559	.	-	.	gene_id "ENSRNOG00000011167"; transcript_id "rnCircRNA-309"; exon_number "7" gene_name "Wdhd1"; gene_biotype "protein_coding"; oId "ce:circWdhd1-1421-001"; tissue "ce";
15	ncSplice	exon	27972311	27972442	.	-	.	gene_id "ENSRNOG00000011167"; transcript_id "rnCircRNA-309"; exon_number "8" gene_name "Wdhd1"; gene_biotype "protein_coding"; oId "ce:circWdhd1-1421-001"; tissue "ce";
15	ncSplice	exon	27973030	27973144	.	-	.	gene_id "ENSRNOG00000011167"; transcript_id "rnCircRNA-309"; exon_number "9" gene_name "Wdhd1"; gene_biotype "protein_coding"; oId "ce:circWdhd1-1421-001"; tissue "ce";
15	ncSplice	gene	2828521	2846623	.	-	.	gene_id "ENSRNOG00000012850"; gene_name "Kat6b"; gene_source "ncSplice"; gene_biotype "protein_coding";
15	ncSplice	transcript	2828521	2846623	.	-	.	gene_id "ENSRNOG00000012850"; transcript_id "rnCircRNA-310"; gene_name "Kat6b"; gene_biotype "protein_coding"; transcript_biotype "circRNA"; oId "ce:circKat6b-1424-001"; tissue "ce";
15	ncSplice	exon	2828521	2828614	.	-	.	gene_id "ENSRNOG00000012850"; transcript_id "rnCircRNA-310"; exon_number "1" gene_name "Kat6b"; gene_biotype "protein_coding"; oId "ce:circKat6b-1424-001"; tissue "ce";
15	ncSplice	exon	2831502	2831663	.	-	.	gene_id "ENSRNOG00000012850"; transcript_id "rnCircRNA-310"; exon_number "2" gene_name "Kat6b"; gene_biotype "protein_coding"; oId "ce:circKat6b-1424-001"; tissue "ce";
15	ncSplice	exon	2834567	2834708	.	-	.	gene_id "ENSRNOG00000012850"; transcript_id "rnCircRNA-310"; exon_number "3" gene_name "Kat6b"; gene_biotype "protein_coding"; oId "ce:circKat6b-1424-001"; tissue "ce";
15	ncSplice	exon	2836777	2836892	.	-	.	gene_id "ENSRNOG00000012850"; transcript_id "rnCircRNA-310"; exon_number "4" gene_name "Kat6b"; gene_biotype "protein_coding"; oId "ce:circKat6b-1424-001"; tissue "ce";
15	ncSplice	exon	2838720	2838841	.	-	.	gene_id "ENSRNOG00000012850"; transcript_id "rnCircRNA-310"; exon_number "5" gene_name "Kat6b"; gene_biotype "protein_coding"; oId "ce:circKat6b-1424-001"; tissue "ce";
15	ncSplice	exon	2840295	2840677	.	-	.	gene_id "ENSRNOG00000012850"; transcript_id "rnCircRNA-310"; exon_number "6" gene_name "Kat6b"; gene_biotype "protein_coding"; oId "ce:circKat6b-1424-001"; tissue "ce";
15	ncSplice	exon	2843444	2843576	.	-	.	gene_id "ENSRNOG00000012850"; transcript_id "rnCircRNA-310"; exon_number "7" gene_name "Kat6b"; gene_biotype "protein_coding"; oId "ce:circKat6b-1424-001"; tissue "ce";
15	ncSplice	exon	2846214	2846295	.	-	.	gene_id "ENSRNOG00000012850"; transcript_id "rnCircRNA-310"; exon_number "8" gene_name "Kat6b"; gene_biotype "protein_coding"; oId "ce:circKat6b-1424-001"; tissue "ce";
15	ncSplice	exon	2846508	2846623	.	-	.	gene_id "ENSRNOG00000012850"; transcript_id "rnCircRNA-310"; exon_number "9" gene_name "Kat6b"; gene_biotype "protein_coding"; oId "ce:circKat6b-1424-001"; tissue "ce";
15	ncSplice	gene	38069520	38070330	.	+	.	gene_id "ENSRNOG00000025518"; gene_name "Lrrc16b"; gene_source "ncSplice"; gene_biotype "protein_coding";
15	ncSplice	transcript	38069520	38070330	.	+	.	gene_id "ENSRNOG00000025518"; transcript_id "rnCircRNA-311"; gene_name "Lrrc16b"; gene_biotype "protein_coding"; transcript_biotype "circRNA"; oId "ce:circLrrc16b-1437-001"; tissue "ce";
15	ncSplice	exon	38069520	38069728	.	+	.	gene_id "ENSRNOG00000025518"; transcript_id "rnCircRNA-311"; exon_number "1" gene_name "Lrrc16b"; gene_biotype "protein_coding"; oId "ce:circLrrc16b-1437-001"; tissue "ce";
15	ncSplice	exon	38070230	38070330	.	+	.	gene_id "ENSRNOG00000025518"; transcript_id "rnCircRNA-311"; exon_number "2" gene_name "Lrrc16b"; gene_biotype "protein_coding"; oId "ce:circLrrc16b-1437-001"; tissue "ce";
15	ncSplice	gene	41020712	41031989	.	+	.	gene_id "ENSRNOG00000008734"; gene_name "Zmym2"; gene_source "ncSplice"; gene_biotype "protein_coding";
15	ncSplice	transcript	41020712	41031989	.	+	.	gene_id "ENSRNOG00000008734"; transcript_id "rnCircRNA-312"; gene_name "Zmym2"; gene_biotype "protein_coding"; transcript_biotype "circRNA"; oId "ce:circZmym2-1443-001"; tissue "ce";
15	ncSplice	exon	41020712	41021568	.	+	.	gene_id "ENSRNOG00000008734"; transcript_id "rnCircRNA-312"; exon_number "1" gene_name "Zmym2"; gene_biotype "protein_coding"; oId "ce:circZmym2-1443-001"; tissue "ce";
15	ncSplice	exon	41028707	41028989	.	+	.	gene_id "ENSRNOG00000008734"; transcript_id "rnCircRNA-312"; exon_number "2" gene_name "Zmym2"; gene_biotype "protein_coding"; oId "ce:circZmym2-1443-001"; tissue "ce";
15	ncSplice	exon	41030824	41030989	.	+	.	gene_id "ENSRNOG00000008734"; transcript_id "rnCircRNA-312"; exon_number "3" gene_name "Zmym2"; gene_biotype "protein_coding"; oId "ce:circZmym2-1443-001"; tissue "ce";
15	ncSplice	exon	41031777	41031989	.	+	.	gene_id "ENSRNOG00000008734"; transcript_id "rnCircRNA-312"; exon_number "4" gene_name "Zmym2"; gene_biotype "protein_coding"; oId "ce:circZmym2-1443-001"; tissue "ce";
15	ncSplice	gene	43492185	43518571	.	-	.	gene_id "ENSRNOG00000038908"; gene_name "Phf11b"; gene_source "ncSplice"; gene_biotype "protein_coding";
15	ncSplice	transcript	43492185	43518571	.	-	.	gene_id "ENSRNOG00000038908"; transcript_id "rnCircRNA-313"; gene_name "Phf11b"; gene_biotype "protein_coding"; transcript_biotype "circRNA"; oId "ce:circPhf11b-1453-001"; tissue "ce";
15	ncSplice	exon	43492185	43516862	.	-	.	gene_id "ENSRNOG00000038908"; transcript_id "rnCircRNA-313"; exon_number "1" gene_name "Phf11b"; gene_biotype "protein_coding"; oId "ce:circPhf11b-1453-001"; tissue "ce";
15	ncSplice	exon	43518440	43518571	.	-	.	gene_id "ENSRNOG00000038908"; transcript_id "rnCircRNA-313"; exon_number "2" gene_name "Phf11b"; gene_biotype "protein_coding"; oId "ce:circPhf11b-1453-001"; tissue "ce";
15	ncSplice	gene	43903119	43926263	.	-	.	gene_id "ENSRNOG00000008053"; gene_name "LOC691889"; gene_source "ncSplice"; gene_biotype "protein_coding";
15	ncSplice	transcript	43903119	43926263	.	-	.	gene_id "ENSRNOG00000008053"; transcript_id "rnCircRNA-314"; gene_name "LOC691889"; gene_biotype "protein_coding"; transcript_biotype "circRNA"; oId "ce:circLOC691889-1458-001|ts:circLOC691889-2788-002"; tissue "ce|ts";
15	ncSplice	exon	43903119	43903226	.	-	.	gene_id "ENSRNOG00000008053"; transcript_id "rnCircRNA-314"; exon_number "1" gene_name "LOC691889"; gene_biotype "protein_coding"; oId "ce:circLOC691889-1458-001|ts:circLOC691889-2788-002"; tissue "ce|ts";
15	ncSplice	exon	43904872	43904928	.	-	.	gene_id "ENSRNOG00000008053"; transcript_id "rnCircRNA-314"; exon_number "2" gene_name "LOC691889"; gene_biotype "protein_coding"; oId "ce:circLOC691889-1458-001|ts:circLOC691889-2788-002"; tissue "ce|ts";
15	ncSplice	exon	43905113	43905174	.	-	.	gene_id "ENSRNOG00000008053"; transcript_id "rnCircRNA-314"; exon_number "3" gene_name "LOC691889"; gene_biotype "protein_coding"; oId "ce:circLOC691889-1458-001|ts:circLOC691889-2788-002"; tissue "ce|ts";
15	ncSplice	exon	43914481	43914559	.	-	.	gene_id "ENSRNOG00000008053"; transcript_id "rnCircRNA-314"; exon_number "4" gene_name "LOC691889"; gene_biotype "protein_coding"; oId "ce:circLOC691889-1458-001|ts:circLOC691889-2788-002"; tissue "ce|ts";
15	ncSplice	exon	43917670	43917792	.	-	.	gene_id "ENSRNOG00000008053"; transcript_id "rnCircRNA-314"; exon_number "5" gene_name "LOC691889"; gene_biotype "protein_coding"; oId "ce:circLOC691889-1458-001|ts:circLOC691889-2788-002"; tissue "ce|ts";
15	ncSplice	exon	43926189	43926263	.	-	.	gene_id "ENSRNOG00000008053"; transcript_id "rnCircRNA-314"; exon_number "6" gene_name "LOC691889"; gene_biotype "protein_coding"; oId "ce:circLOC691889-1458-001|ts:circLOC691889-2788-002"; tissue "ce|ts";
15	ncSplice	gene	51193506	51197952	.	-	.	gene_id "ENSRNOG00000047258"; gene_name "Prss55"; gene_source "ncSplice"; gene_biotype "protein_coding";
15	ncSplice	transcript	51193506	51197952	.	-	.	gene_id "ENSRNOG00000047258"; transcript_id "rnCircRNA-315"; gene_name "Prss55"; gene_biotype "protein_coding"; transcript_biotype "circRNA"; oId "ce:circPrss55-1465-001"; tissue "ce";
15	ncSplice	exon	51193506	51193648	.	-	.	gene_id "ENSRNOG00000047258"; transcript_id "rnCircRNA-315"; exon_number "1" gene_name "Prss55"; gene_biotype "protein_coding"; oId "ce:circPrss55-1465-001"; tissue "ce";
15	ncSplice	exon	51195443	51195690	.	-	.	gene_id "ENSRNOG00000047258"; transcript_id "rnCircRNA-315"; exon_number "2" gene_name "Prss55"; gene_biotype "protein_coding"; oId "ce:circPrss55-1465-001"; tissue "ce";
15	ncSplice	exon	51197760	51197952	.	-	.	gene_id "ENSRNOG00000047258"; transcript_id "rnCircRNA-315"; exon_number "3" gene_name "Prss55"; gene_biotype "protein_coding"; oId "ce:circPrss55-1465-001"; tissue "ce";
15	ncSplice	gene	58823535	58827330	.	-	.	gene_id "ENSRNOG00000016029"; gene_name "Rb1"; gene_source "ncSplice"; gene_biotype "protein_coding";
15	ncSplice	transcript	58823535	58827330	.	-	.	gene_id "ENSRNOG00000016029"; transcript_id "rnCircRNA-316"; gene_name "Rb1"; gene_biotype "protein_coding"; transcript_biotype "circRNA"; oId "ce:circRb1-1490-001"; tissue "ce";
15	ncSplice	exon	58823535	58823680	.	-	.	gene_id "ENSRNOG00000016029"; transcript_id "rnCircRNA-316"; exon_number "1" gene_name "Rb1"; gene_biotype "protein_coding"; oId "ce:circRb1-1490-001"; tissue "ce";
15	ncSplice	exon	58824829	58824974	.	-	.	gene_id "ENSRNOG00000016029"; transcript_id "rnCircRNA-316"; exon_number "2" gene_name "Rb1"; gene_biotype "protein_coding"; oId "ce:circRb1-1490-001"; tissue "ce";
15	ncSplice	exon	58827215	58827330	.	-	.	gene_id "ENSRNOG00000016029"; transcript_id "rnCircRNA-316"; exon_number "3" gene_name "Rb1"; gene_biotype "protein_coding"; oId "ce:circRb1-1490-001"; tissue "ce";
15	ncSplice	gene	58874806	58877670	.	-	.	gene_id "ENSRNOG00000016029"; gene_name "Rb1"; gene_source "ncSplice"; gene_biotype "protein_coding";
15	ncSplice	transcript	58874806	58877670	.	-	.	gene_id "ENSRNOG00000016029"; transcript_id "rnCircRNA-317"; gene_name "Rb1"; gene_biotype "protein_coding"; transcript_biotype "circRNA"; oId "ce:circRb1-1493-001|ts:circRb1-2845-001"; tissue "ce|ts";
15	ncSplice	exon	58874806	58875002	.	-	.	gene_id "ENSRNOG00000016029"; transcript_id "rnCircRNA-317"; exon_number "1" gene_name "Rb1"; gene_biotype "protein_coding"; oId "ce:circRb1-1493-001|ts:circRb1-2845-001"; tissue "ce|ts";
15	ncSplice	exon	58876566	58876642	.	-	.	gene_id "ENSRNOG00000016029"; transcript_id "rnCircRNA-317"; exon_number "2" gene_name "Rb1"; gene_biotype "protein_coding"; oId "ce:circRb1-1493-001|ts:circRb1-2845-001"; tissue "ce|ts";
15	ncSplice	exon	58876724	58876755	.	-	.	gene_id "ENSRNOG00000016029"; transcript_id "rnCircRNA-317"; exon_number "3" gene_name "Rb1"; gene_biotype "protein_coding"; oId "ce:circRb1-1493-001|ts:circRb1-2845-001"; tissue "ce|ts";
15	ncSplice	exon	58876845	58876901	.	-	.	gene_id "ENSRNOG00000016029"; transcript_id "rnCircRNA-317"; exon_number "4" gene_name "Rb1"; gene_biotype "protein_coding"; oId "ce:circRb1-1493-001|ts:circRb1-2845-001"; tissue "ce|ts";
15	ncSplice	exon	58877554	58877670	.	-	.	gene_id "ENSRNOG00000016029"; transcript_id "rnCircRNA-317"; exon_number "5" gene_name "Rb1"; gene_biotype "protein_coding"; oId "ce:circRb1-1493-001|ts:circRb1-2845-001"; tissue "ce|ts";
15	ncSplice	gene	58882999	58908513	.	-	.	gene_id "ENSRNOG00000016029"; gene_name "Rb1"; gene_source "ncSplice"; gene_biotype "protein_coding";
15	ncSplice	transcript	58882999	58908513	.	-	.	gene_id "ENSRNOG00000016029"; transcript_id "rnCircRNA-318"; gene_name "Rb1"; gene_biotype "protein_coding"; transcript_biotype "circRNA"; oId "ce:circRb1-1497-001"; tissue "ce";
15	ncSplice	exon	58882999	58883086	.	-	.	gene_id "ENSRNOG00000016029"; transcript_id "rnCircRNA-318"; exon_number "1" gene_name "Rb1"; gene_biotype "protein_coding"; oId "ce:circRb1-1497-001"; tissue "ce";
15	ncSplice	exon	58886668	58886745	.	-	.	gene_id "ENSRNOG00000016029"; transcript_id "rnCircRNA-318"; exon_number "2" gene_name "Rb1"; gene_biotype "protein_coding"; oId "ce:circRb1-1497-001"; tissue "ce";
15	ncSplice	exon	58887655	58887764	.	-	.	gene_id "ENSRNOG00000016029"; transcript_id "rnCircRNA-318"; exon_number "3" gene_name "Rb1"; gene_biotype "protein_coding"; oId "ce:circRb1-1497-001"; tissue "ce";
15	ncSplice	exon	58889407	58889484	.	-	.	gene_id "ENSRNOG00000016029"; transcript_id "rnCircRNA-318"; exon_number "4" gene_name "Rb1"; gene_biotype "protein_coding"; oId "ce:circRb1-1497-001"; tissue "ce";
15	ncSplice	exon	58891303	58891445	.	-	.	gene_id "ENSRNOG00000016029"; transcript_id "rnCircRNA-318"; exon_number "5" gene_name "Rb1"; gene_biotype "protein_coding"; oId "ce:circRb1-1497-001"; tissue "ce";
15	ncSplice	exon	58895751	58895861	.	-	.	gene_id "ENSRNOG00000016029"; transcript_id "rnCircRNA-318"; exon_number "6" gene_name "Rb1"; gene_biotype "protein_coding"; oId "ce:circRb1-1497-001"; tissue "ce";
15	ncSplice	exon	58900718	58900785	.	-	.	gene_id "ENSRNOG00000016029"; transcript_id "rnCircRNA-318"; exon_number "7" gene_name "Rb1"; gene_biotype "protein_coding"; oId "ce:circRb1-1497-001"; tissue "ce";
15	ncSplice	exon	58901782	58901820	.	-	.	gene_id "ENSRNOG00000016029"; transcript_id "rnCircRNA-318"; exon_number "8" gene_name "Rb1"; gene_biotype "protein_coding"; oId "ce:circRb1-1497-001"; tissue "ce";
15	ncSplice	exon	58908394	58908513	.	-	.	gene_id "ENSRNOG00000016029"; transcript_id "rnCircRNA-318"; exon_number "9" gene_name "Rb1"; gene_biotype "protein_coding"; oId "ce:circRb1-1497-001"; tissue "ce";
15	ncSplice	gene	65330206	65347367	.	+	.	gene_id "ENSRNOG00000047106"; gene_name "Mtrf1"; gene_source "ncSplice"; gene_biotype "protein_coding";
15	ncSplice	transcript	65330206	65347367	.	+	.	gene_id "ENSRNOG00000047106"; transcript_id "rnCircRNA-319"; gene_name "Mtrf1"; gene_biotype "protein_coding"; transcript_biotype "circRNA"; oId "ce:circMtrf1-1510-001"; tissue "ce";
15	ncSplice	exon	65330206	65330631	.	+	.	gene_id "ENSRNOG00000047106"; transcript_id "rnCircRNA-319"; exon_number "1" gene_name "Mtrf1"; gene_biotype "protein_coding"; oId "ce:circMtrf1-1510-001"; tissue "ce";
15	ncSplice	exon	65331445	65331536	.	+	.	gene_id "ENSRNOG00000047106"; transcript_id "rnCircRNA-319"; exon_number "2" gene_name "Mtrf1"; gene_biotype "protein_coding"; oId "ce:circMtrf1-1510-001"; tissue "ce";
15	ncSplice	exon	65333250	65333331	.	+	.	gene_id "ENSRNOG00000047106"; transcript_id "rnCircRNA-319"; exon_number "3" gene_name "Mtrf1"; gene_biotype "protein_coding"; oId "ce:circMtrf1-1510-001"; tissue "ce";
15	ncSplice	exon	65333506	65333613	.	+	.	gene_id "ENSRNOG00000047106"; transcript_id "rnCircRNA-319"; exon_number "4" gene_name "Mtrf1"; gene_biotype "protein_coding"; oId "ce:circMtrf1-1510-001"; tissue "ce";
15	ncSplice	exon	65337782	65337954	.	+	.	gene_id "ENSRNOG00000047106"; transcript_id "rnCircRNA-319"; exon_number "5" gene_name "Mtrf1"; gene_biotype "protein_coding"; oId "ce:circMtrf1-1510-001"; tissue "ce";
15	ncSplice	exon	65339242	65339359	.	+	.	gene_id "ENSRNOG00000047106"; transcript_id "rnCircRNA-319"; exon_number "6" gene_name "Mtrf1"; gene_biotype "protein_coding"; oId "ce:circMtrf1-1510-001"; tissue "ce";
15	ncSplice	exon	65342776	65342912	.	+	.	gene_id "ENSRNOG00000047106"; transcript_id "rnCircRNA-319"; exon_number "7" gene_name "Mtrf1"; gene_biotype "protein_coding"; oId "ce:circMtrf1-1510-001"; tissue "ce";
15	ncSplice	exon	65347269	65347367	.	+	.	gene_id "ENSRNOG00000047106"; transcript_id "rnCircRNA-319"; exon_number "8" gene_name "Mtrf1"; gene_biotype "protein_coding"; oId "ce:circMtrf1-1510-001"; tissue "ce";
15	ncSplice	gene	97326645	97342948	.	-	.	gene_id "ENSRNOG00000010479"; gene_name "Mycbp2"; gene_source "ncSplice"; gene_biotype "protein_coding";
15	ncSplice	transcript	97326645	97342948	.	-	.	gene_id "ENSRNOG00000010479"; transcript_id "rnCircRNA-320"; gene_name "Mycbp2"; gene_biotype "protein_coding"; transcript_biotype "circRNA"; oId "ce:circMycbp2-1530-001"; tissue "ce";
15	ncSplice	exon	97326645	97326746	.	-	.	gene_id "ENSRNOG00000010479"; transcript_id "rnCircRNA-320"; exon_number "1" gene_name "Mycbp2"; gene_biotype "protein_coding"; oId "ce:circMycbp2-1530-001"; tissue "ce";
15	ncSplice	exon	97327237	97333335	.	-	.	gene_id "ENSRNOG00000010479"; transcript_id "rnCircRNA-320"; exon_number "2" gene_name "Mycbp2"; gene_biotype "protein_coding"; oId "ce:circMycbp2-1530-001"; tissue "ce";
15	ncSplice	exon	97335706	97335864	.	-	.	gene_id "ENSRNOG00000010479"; transcript_id "rnCircRNA-320"; exon_number "3" gene_name "Mycbp2"; gene_biotype "protein_coding"; oId "ce:circMycbp2-1530-001"; tissue "ce";
15	ncSplice	exon	97338070	97339587	.	-	.	gene_id "ENSRNOG00000010479"; transcript_id "rnCircRNA-320"; exon_number "4" gene_name "Mycbp2"; gene_biotype "protein_coding"; oId "ce:circMycbp2-1530-001"; tissue "ce";
15	ncSplice	exon	97340328	97340404	.	-	.	gene_id "ENSRNOG00000010479"; transcript_id "rnCircRNA-320"; exon_number "5" gene_name "Mycbp2"; gene_biotype "protein_coding"; oId "ce:circMycbp2-1530-001"; tissue "ce";
15	ncSplice	exon	97341769	97341907	.	-	.	gene_id "ENSRNOG00000010479"; transcript_id "rnCircRNA-320"; exon_number "6" gene_name "Mycbp2"; gene_biotype "protein_coding"; oId "ce:circMycbp2-1530-001"; tissue "ce";
15	ncSplice	exon	97342875	97342948	.	-	.	gene_id "ENSRNOG00000010479"; transcript_id "rnCircRNA-320"; exon_number "7" gene_name "Mycbp2"; gene_biotype "protein_coding"; oId "ce:circMycbp2-1530-001"; tissue "ce";
16	ncSplice	gene	14068369	14070950	.	-	.	gene_id "ENSRNOG00000022781"; gene_name "Ccser2"; gene_source "ncSplice"; gene_biotype "protein_coding";
16	ncSplice	transcript	14068369	14070950	.	-	.	gene_id "ENSRNOG00000022781"; transcript_id "rnCircRNA-321"; gene_name "Ccser2"; gene_biotype "protein_coding"; transcript_biotype "circRNA"; oId "ce:circCcser2-1537-001"; tissue "ce";
16	ncSplice	exon	14068369	14068565	.	-	.	gene_id "ENSRNOG00000022781"; transcript_id "rnCircRNA-321"; exon_number "1" gene_name "Ccser2"; gene_biotype "protein_coding"; oId "ce:circCcser2-1537-001"; tissue "ce";
16	ncSplice	exon	14069498	14070950	.	-	.	gene_id "ENSRNOG00000022781"; transcript_id "rnCircRNA-321"; exon_number "2" gene_name "Ccser2"; gene_biotype "protein_coding"; oId "ce:circCcser2-1537-001"; tissue "ce";
16	ncSplice	gene	20763397	20766581	.	-	.	gene_id "ENSRNOG00000020269"; gene_name "Sugp2"; gene_source "ncSplice"; gene_biotype "protein_coding";
16	ncSplice	transcript	20763397	20766581	.	-	.	gene_id "ENSRNOG00000020269"; transcript_id "rnCircRNA-322"; gene_name "Sugp2"; gene_biotype "protein_coding"; transcript_biotype "circRNA"; oId "ce:circSugp2-1546-001"; tissue "ce";
[truncated: 10,042 more rows]
