# Supplementary material for: Circular RNA repertoires are associated with evolutionarily young transposable elements
Source: eLife. 2021 Sep 20;10:e67991. doi: 10.7554/eLife.67991 (PMC8516420; doi:10.7554/eLife.67991)
Supplement: Supplementary file 15. — A gtf-file with all circRNA transcripts including the transcript and exon coordinates. [file elife-67991-supp15.gtf]

10	ncSplice	gene	23354468	23363984	.	-	.	gene_id "ENSMMUG00000011112"; gene_name "TOP1"; gene_source "ncSplice"; gene_biotype "protein_coding";
10	ncSplice	transcript	23354468	23363984	.	-	.	gene_id "ENSMMUG00000011112"; transcript_id "rmCircRNA-1"; gene_name "TOP1"; gene_biotype "protein_coding"; transcript_biotype "circRNA"; oId "lv:circTOP1-25-001|ts:circTOP1-57-001"; tissue "lv|ts";
10	ncSplice	exon	23354468	23354612	.	-	.	gene_id "ENSMMUG00000011112"; transcript_id "rmCircRNA-1"; exon_number "1" gene_name "TOP1"; gene_biotype "protein_coding"; oId "lv:circTOP1-25-001|ts:circTOP1-57-001"; tissue "lv|ts";
10	ncSplice	exon	23355576	23355763	.	-	.	gene_id "ENSMMUG00000011112"; transcript_id "rmCircRNA-1"; exon_number "2" gene_name "TOP1"; gene_biotype "protein_coding"; oId "lv:circTOP1-25-001|ts:circTOP1-57-001"; tissue "lv|ts";
10	ncSplice	exon	23357482	23357604	.	-	.	gene_id "ENSMMUG00000011112"; transcript_id "rmCircRNA-1"; exon_number "3" gene_name "TOP1"; gene_biotype "protein_coding"; oId "lv:circTOP1-25-001|ts:circTOP1-57-001"; tissue "lv|ts";
10	ncSplice	exon	23358795	23358916	.	-	.	gene_id "ENSMMUG00000011112"; transcript_id "rmCircRNA-1"; exon_number "4" gene_name "TOP1"; gene_biotype "protein_coding"; oId "lv:circTOP1-25-001|ts:circTOP1-57-001"; tissue "lv|ts";
10	ncSplice	exon	23363869	23363984	.	-	.	gene_id "ENSMMUG00000011112"; transcript_id "rmCircRNA-1"; exon_number "5" gene_name "TOP1"; gene_biotype "protein_coding"; oId "lv:circTOP1-25-001|ts:circTOP1-57-001"; tissue "lv|ts";
10	ncSplice	gene	2404586	2408012	.	+	.	gene_id "ENSMMUG00000018354"; gene_name "PSMA7"; gene_source "ncSplice"; gene_biotype "protein_coding";
10	ncSplice	transcript	2404586	2408012	.	+	.	gene_id "ENSMMUG00000018354"; transcript_id "rmCircRNA-2"; gene_name "PSMA7"; gene_biotype "protein_coding"; transcript_biotype "circRNA"; oId "lv:circPSMA7-29-001"; tissue "lv";
10	ncSplice	exon	2404586	2404712	.	+	.	gene_id "ENSMMUG00000018354"; transcript_id "rmCircRNA-2"; exon_number "1" gene_name "PSMA7"; gene_biotype "protein_coding"; oId "lv:circPSMA7-29-001"; tissue "lv";
10	ncSplice	exon	2405449	2405573	.	+	.	gene_id "ENSMMUG00000018354"; transcript_id "rmCircRNA-2"; exon_number "2" gene_name "PSMA7"; gene_biotype "protein_coding"; oId "lv:circPSMA7-29-001"; tissue "lv";
10	ncSplice	exon	2406188	2406211	.	+	.	gene_id "ENSMMUG00000018354"; transcript_id "rmCircRNA-2"; exon_number "3" gene_name "PSMA7"; gene_biotype "protein_coding"; oId "lv:circPSMA7-29-001"; tissue "lv";
10	ncSplice	exon	2406214	2406309	.	+	.	gene_id "ENSMMUG00000018354"; transcript_id "rmCircRNA-2"; exon_number "4" gene_name "PSMA7"; gene_biotype "protein_coding"; oId "lv:circPSMA7-29-001"; tissue "lv";
10	ncSplice	exon	2407094	2407213	.	+	.	gene_id "ENSMMUG00000018354"; transcript_id "rmCircRNA-2"; exon_number "5" gene_name "PSMA7"; gene_biotype "protein_coding"; oId "lv:circPSMA7-29-001"; tissue "lv";
10	ncSplice	exon	2407950	2408012	.	+	.	gene_id "ENSMMUG00000018354"; transcript_id "rmCircRNA-2"; exon_number "6" gene_name "PSMA7"; gene_biotype "protein_coding"; oId "lv:circPSMA7-29-001"; tissue "lv";
10	ncSplice	gene	26600910	26621468	.	-	.	gene_id "ENSMMUG00000017224"; gene_name "CTNNBL1"; gene_source "ncSplice"; gene_biotype "protein_coding";
10	ncSplice	transcript	26600910	26621468	.	-	.	gene_id "ENSMMUG00000017224"; transcript_id "rmCircRNA-3"; gene_name "CTNNBL1"; gene_biotype "protein_coding"; transcript_biotype "circRNA"; oId "lv:circCTNNBL1-39-002|ts:circCTNNBL1-69-006"; tissue "lv|ts";
10	ncSplice	exon	26600910	26600982	.	-	.	gene_id "ENSMMUG00000017224"; transcript_id "rmCircRNA-3"; exon_number "1" gene_name "CTNNBL1"; gene_biotype "protein_coding"; oId "lv:circCTNNBL1-39-002|ts:circCTNNBL1-69-006"; tissue "lv|ts";
10	ncSplice	exon	26601201	26601338	.	-	.	gene_id "ENSMMUG00000017224"; transcript_id "rmCircRNA-3"; exon_number "2" gene_name "CTNNBL1"; gene_biotype "protein_coding"; oId "lv:circCTNNBL1-39-002|ts:circCTNNBL1-69-006"; tissue "lv|ts";
10	ncSplice	exon	26619098	26619178	.	-	.	gene_id "ENSMMUG00000017224"; transcript_id "rmCircRNA-3"; exon_number "3" gene_name "CTNNBL1"; gene_biotype "protein_coding"; oId "lv:circCTNNBL1-39-002|ts:circCTNNBL1-69-006"; tissue "lv|ts";
10	ncSplice	exon	26621371	26621468	.	-	.	gene_id "ENSMMUG00000017224"; transcript_id "rmCircRNA-3"; exon_number "4" gene_name "CTNNBL1"; gene_biotype "protein_coding"; oId "lv:circCTNNBL1-39-002|ts:circCTNNBL1-69-006"; tissue "lv|ts";
10	ncSplice	gene	28811071	28813849	.	+	.	gene_id "ENSMMUG00000011598"; gene_name "NA"; gene_source "ncSplice"; gene_biotype "protein_coding";
10	ncSplice	transcript	28811071	28813849	.	+	.	gene_id "ENSMMUG00000011598"; transcript_id "rmCircRNA-4"; gene_name "NA"; gene_biotype "protein_coding"; transcript_biotype "circRNA"; oId "lv:circNA-50-001"; tissue "lv";
10	ncSplice	exon	28811071	28811265	.	+	.	gene_id "ENSMMUG00000011598"; transcript_id "rmCircRNA-4"; exon_number "1" gene_name "NA"; gene_biotype "protein_coding"; oId "lv:circNA-50-001"; tissue "lv";
10	ncSplice	exon	28813634	28813699	.	+	.	gene_id "ENSMMUG00000011598"; transcript_id "rmCircRNA-4"; exon_number "2" gene_name "NA"; gene_biotype "protein_coding"; oId "lv:circNA-50-001"; tissue "lv";
10	ncSplice	exon	28813796	28813849	.	+	.	gene_id "ENSMMUG00000011598"; transcript_id "rmCircRNA-4"; exon_number "3" gene_name "NA"; gene_biotype "protein_coding"; oId "lv:circNA-50-001"; tissue "lv";
10	ncSplice	gene	30146641	30147991	.	-	.	gene_id "ENSMMUG00000012912"; gene_name "ITCH"; gene_source "ncSplice"; gene_biotype "protein_coding";
10	ncSplice	transcript	30146641	30147991	.	-	.	gene_id "ENSMMUG00000012912"; transcript_id "rmCircRNA-5"; gene_name "ITCH"; gene_biotype "protein_coding"; transcript_biotype "circRNA"; oId "lv:circITCH-62-001|ce:circITCH-181-001"; tissue "lv|ce";
10	ncSplice	exon	30146641	30146778	.	-	.	gene_id "ENSMMUG00000012912"; transcript_id "rmCircRNA-5"; exon_number "1" gene_name "ITCH"; gene_biotype "protein_coding"; oId "lv:circITCH-62-001|ce:circITCH-181-001"; tissue "lv|ce";
10	ncSplice	exon	30147867	30147991	.	-	.	gene_id "ENSMMUG00000012912"; transcript_id "rmCircRNA-5"; exon_number "2" gene_name "ITCH"; gene_biotype "protein_coding"; oId "lv:circITCH-62-001|ce:circITCH-181-001"; tissue "lv|ce";
10	ncSplice	gene	32204065	32206786	.	-	.	gene_id "ENSMMUG00000007117"; gene_name "ASXL1"; gene_source "ncSplice"; gene_biotype "protein_coding";
10	ncSplice	transcript	32204065	32206786	.	-	.	gene_id "ENSMMUG00000007117"; transcript_id "rmCircRNA-6"; gene_name "ASXL1"; gene_biotype "protein_coding"; transcript_biotype "circRNA"; oId "lv:circASXL1-73-001"; tissue "lv";
10	ncSplice	exon	32204065	32204173	.	-	.	gene_id "ENSMMUG00000007117"; transcript_id "rmCircRNA-6"; exon_number "1" gene_name "ASXL1"; gene_biotype "protein_coding"; oId "lv:circASXL1-73-001"; tissue "lv";
10	ncSplice	exon	32206704	32206786	.	-	.	gene_id "ENSMMUG00000007117"; transcript_id "rmCircRNA-6"; exon_number "2" gene_name "ASXL1"; gene_biotype "protein_coding"; oId "lv:circASXL1-73-001"; tissue "lv";
10	ncSplice	gene	36917227	36921845	.	+	.	gene_id "ENSMMUG00000022283"; gene_name "ATRN"; gene_source "ncSplice"; gene_biotype "protein_coding";
10	ncSplice	transcript	36917227	36921845	.	+	.	gene_id "ENSMMUG00000022283"; transcript_id "rmCircRNA-7"; gene_name "ATRN"; gene_biotype "protein_coding"; transcript_biotype "circRNA"; oId "lv:circATRN-83-002"; tissue "lv";
10	ncSplice	exon	36917227	36917279	.	+	.	gene_id "ENSMMUG00000022283"; transcript_id "rmCircRNA-7"; exon_number "1" gene_name "ATRN"; gene_biotype "protein_coding"; oId "lv:circATRN-83-002"; tissue "lv";
10	ncSplice	exon	36918775	36918869	.	+	.	gene_id "ENSMMUG00000022283"; transcript_id "rmCircRNA-7"; exon_number "2" gene_name "ATRN"; gene_biotype "protein_coding"; oId "lv:circATRN-83-002"; tissue "lv";
10	ncSplice	exon	36921767	36921845	.	+	.	gene_id "ENSMMUG00000022283"; transcript_id "rmCircRNA-7"; exon_number "3" gene_name "ATRN"; gene_biotype "protein_coding"; oId "lv:circATRN-83-002"; tissue "lv";
10	ncSplice	gene	37244018	37248224	.	+	.	gene_id "ENSMMUG00000019956"; gene_name "PANK2"; gene_source "ncSplice"; gene_biotype "protein_coding";
10	ncSplice	transcript	37244018	37248224	.	+	.	gene_id "ENSMMUG00000019956"; transcript_id "rmCircRNA-8"; gene_name "PANK2"; gene_biotype "protein_coding"; transcript_biotype "circRNA"; oId "lv:circPANK2-88-001|ce:circPANK2-248-001|ts:circPANK2-140-001"; tissue "lv|ce|ts";
10	ncSplice	exon	37244018	37244370	.	+	.	gene_id "ENSMMUG00000019956"; transcript_id "rmCircRNA-8"; exon_number "1" gene_name "PANK2"; gene_biotype "protein_coding"; oId "lv:circPANK2-88-001|ce:circPANK2-248-001|ts:circPANK2-140-001"; tissue "lv|ce|ts";
10	ncSplice	exon	37246151	37246404	.	+	.	gene_id "ENSMMUG00000019956"; transcript_id "rmCircRNA-8"; exon_number "2" gene_name "PANK2"; gene_biotype "protein_coding"; oId "lv:circPANK2-88-001|ce:circPANK2-248-001|ts:circPANK2-140-001"; tissue "lv|ce|ts";
10	ncSplice	exon	37248048	37248224	.	+	.	gene_id "ENSMMUG00000019956"; transcript_id "rmCircRNA-8"; exon_number "3" gene_name "PANK2"; gene_biotype "protein_coding"; oId "lv:circPANK2-88-001|ce:circPANK2-248-001|ts:circPANK2-140-001"; tissue "lv|ce|ts";
10	ncSplice	gene	56701445	56708334	.	-	.	gene_id "ENSMMUG00000022388"; gene_name "NAPB"; gene_source "ncSplice"; gene_biotype "protein_coding";
10	ncSplice	transcript	56701445	56708334	.	-	.	gene_id "ENSMMUG00000022388"; transcript_id "rmCircRNA-9"; gene_name "NAPB"; gene_biotype "protein_coding"; transcript_biotype "circRNA"; oId "lv:circNAPB-114-002"; tissue "lv";
10	ncSplice	exon	56701445	56701522	.	-	.	gene_id "ENSMMUG00000022388"; transcript_id "rmCircRNA-9"; exon_number "1" gene_name "NAPB"; gene_biotype "protein_coding"; oId "lv:circNAPB-114-002"; tissue "lv";
10	ncSplice	exon	56701661	56701785	.	-	.	gene_id "ENSMMUG00000022388"; transcript_id "rmCircRNA-9"; exon_number "2" gene_name "NAPB"; gene_biotype "protein_coding"; oId "lv:circNAPB-114-002"; tissue "lv";
10	ncSplice	exon	56703587	56703703	.	-	.	gene_id "ENSMMUG00000022388"; transcript_id "rmCircRNA-9"; exon_number "3" gene_name "NAPB"; gene_biotype "protein_coding"; oId "lv:circNAPB-114-002"; tissue "lv";
10	ncSplice	exon	56708255	56708334	.	-	.	gene_id "ENSMMUG00000022388"; transcript_id "rmCircRNA-9"; exon_number "4" gene_name "NAPB"; gene_biotype "protein_coding"; oId "lv:circNAPB-114-002"; tissue "lv";
10	ncSplice	gene	6079577	6081720	.	-	.	gene_id "ENSMMUG00000004986"; gene_name "VAPB"; gene_source "ncSplice"; gene_biotype "protein_coding";
10	ncSplice	transcript	6079577	6081720	.	-	.	gene_id "ENSMMUG00000004986"; transcript_id "rmCircRNA-10"; gene_name "VAPB"; gene_biotype "protein_coding"; transcript_biotype "circRNA"; oId "lv:circVAPB-119-001|ce:circVAPB-336-001|ts:circVAPB-209-001"; tissue "lv|ce|ts";
10	ncSplice	exon	6079577	6079753	.	-	.	gene_id "ENSMMUG00000004986"; transcript_id "rmCircRNA-10"; exon_number "1" gene_name "VAPB"; gene_biotype "protein_coding"; oId "lv:circVAPB-119-001|ce:circVAPB-336-001|ts:circVAPB-209-001"; tissue "lv|ce|ts";
10	ncSplice	exon	6081640	6081720	.	-	.	gene_id "ENSMMUG00000004986"; transcript_id "rmCircRNA-10"; exon_number "2" gene_name "VAPB"; gene_biotype "protein_coding"; oId "lv:circVAPB-119-001|ce:circVAPB-336-001|ts:circVAPB-209-001"; tissue "lv|ce|ts";
10	ncSplice	gene	65556311	65565187	.	-	.	gene_id "ENSMMUG00000012524"; gene_name "MAPK1"; gene_source "ncSplice"; gene_biotype "protein_coding";
10	ncSplice	transcript	65556311	65565187	.	-	.	gene_id "ENSMMUG00000012524"; transcript_id "rmCircRNA-11"; gene_name "MAPK1"; gene_biotype "protein_coding"; transcript_biotype "circRNA"; oId "lv:circMAPK1-129-002|ce:circMAPK1-354-006|ts:circMAPK1-225-002"; tissue "lv|ce|ts";
10	ncSplice	exon	65556311	65556427	.	-	.	gene_id "ENSMMUG00000012524"; transcript_id "rmCircRNA-11"; exon_number "1" gene_name "MAPK1"; gene_biotype "protein_coding"; oId "lv:circMAPK1-129-002|ce:circMAPK1-354-006|ts:circMAPK1-225-002"; tissue "lv|ce|ts";
10	ncSplice	exon	65562890	65563079	.	-	.	gene_id "ENSMMUG00000012524"; transcript_id "rmCircRNA-11"; exon_number "2" gene_name "MAPK1"; gene_biotype "protein_coding"; oId "lv:circMAPK1-129-002|ce:circMAPK1-354-006|ts:circMAPK1-225-002"; tissue "lv|ce|ts";
10	ncSplice	exon	65565005	65565187	.	-	.	gene_id "ENSMMUG00000012524"; transcript_id "rmCircRNA-11"; exon_number "3" gene_name "MAPK1"; gene_biotype "protein_coding"; oId "lv:circMAPK1-129-002|ce:circMAPK1-354-006|ts:circMAPK1-225-002"; tissue "lv|ce|ts";
10	ncSplice	gene	67761934	67784798	.	+	.	gene_id "ENSMMUG00000008516"; gene_name "SPECC1L"; gene_source "ncSplice"; gene_biotype "protein_coding";
10	ncSplice	transcript	67761934	67784798	.	+	.	gene_id "ENSMMUG00000008516"; transcript_id "rmCircRNA-12"; gene_name "SPECC1L"; gene_biotype "protein_coding"; transcript_biotype "circRNA"; oId "lv:circSPECC1L-133-001"; tissue "lv";
10	ncSplice	exon	67761934	67762024	.	+	.	gene_id "ENSMMUG00000008516"; transcript_id "rmCircRNA-12"; exon_number "1" gene_name "SPECC1L"; gene_biotype "protein_coding"; oId "lv:circSPECC1L-133-001"; tissue "lv";
10	ncSplice	exon	67778507	67778590	.	+	.	gene_id "ENSMMUG00000008516"; transcript_id "rmCircRNA-12"; exon_number "2" gene_name "SPECC1L"; gene_biotype "protein_coding"; oId "lv:circSPECC1L-133-001"; tissue "lv";
10	ncSplice	exon	67780675	67780831	.	+	.	gene_id "ENSMMUG00000008516"; transcript_id "rmCircRNA-12"; exon_number "3" gene_name "SPECC1L"; gene_biotype "protein_coding"; oId "lv:circSPECC1L-133-001"; tissue "lv";
10	ncSplice	exon	67784696	67784798	.	+	.	gene_id "ENSMMUG00000008516"; transcript_id "rmCircRNA-12"; exon_number "4" gene_name "SPECC1L"; gene_biotype "protein_coding"; oId "lv:circSPECC1L-133-001"; tissue "lv";
10	ncSplice	gene	82399044	82404766	.	-	.	gene_id "ENSMMUG00000004304"; gene_name "DDX17"; gene_source "ncSplice"; gene_biotype "protein_coding";
10	ncSplice	transcript	82399044	82404766	.	-	.	gene_id "ENSMMUG00000004304"; transcript_id "rmCircRNA-13"; gene_name "DDX17"; gene_biotype "protein_coding"; transcript_biotype "circRNA"; oId "lv:circDDX17-174-001"; tissue "lv";
10	ncSplice	exon	82399044	82399185	.	-	.	gene_id "ENSMMUG00000004304"; transcript_id "rmCircRNA-13"; exon_number "1" gene_name "DDX17"; gene_biotype "protein_coding"; oId "lv:circDDX17-174-001"; tissue "lv";
10	ncSplice	exon	82401416	82401481	.	-	.	gene_id "ENSMMUG00000004304"; transcript_id "rmCircRNA-13"; exon_number "2" gene_name "DDX17"; gene_biotype "protein_coding"; oId "lv:circDDX17-174-001"; tissue "lv";
10	ncSplice	exon	82401783	82401916	.	-	.	gene_id "ENSMMUG00000004304"; transcript_id "rmCircRNA-13"; exon_number "3" gene_name "DDX17"; gene_biotype "protein_coding"; oId "lv:circDDX17-174-001"; tissue "lv";
10	ncSplice	exon	82402732	82402831	.	-	.	gene_id "ENSMMUG00000004304"; transcript_id "rmCircRNA-13"; exon_number "4" gene_name "DDX17"; gene_biotype "protein_coding"; oId "lv:circDDX17-174-001"; tissue "lv";
10	ncSplice	exon	82404616	82404766	.	-	.	gene_id "ENSMMUG00000004304"; transcript_id "rmCircRNA-13"; exon_number "5" gene_name "DDX17"; gene_biotype "protein_coding"; oId "lv:circDDX17-174-001"; tissue "lv";
10	ncSplice	gene	85761626	85763031	.	+	.	gene_id "ENSMMUG00000011531"; gene_name "CCDC134"; gene_source "ncSplice"; gene_biotype "protein_coding";
10	ncSplice	transcript	85761626	85763031	.	+	.	gene_id "ENSMMUG00000011531"; transcript_id "rmCircRNA-14"; gene_name "CCDC134"; gene_biotype "protein_coding"; transcript_biotype "circRNA"; oId "lv:circCCDC134-200-001|ce:circCCDC134-505-001"; tissue "lv|ce";
10	ncSplice	exon	85761626	85761744	.	+	.	gene_id "ENSMMUG00000011531"; transcript_id "rmCircRNA-14"; exon_number "1" gene_name "CCDC134"; gene_biotype "protein_coding"; oId "lv:circCCDC134-200-001|ce:circCCDC134-505-001"; tissue "lv|ce";
10	ncSplice	exon	85762619	85762740	.	+	.	gene_id "ENSMMUG00000011531"; transcript_id "rmCircRNA-14"; exon_number "2" gene_name "CCDC134"; gene_biotype "protein_coding"; oId "lv:circCCDC134-200-001|ce:circCCDC134-505-001"; tissue "lv|ce";
10	ncSplice	exon	85762947	85763031	.	+	.	gene_id "ENSMMUG00000011531"; transcript_id "rmCircRNA-14"; exon_number "3" gene_name "CCDC134"; gene_biotype "protein_coding"; oId "lv:circCCDC134-200-001|ce:circCCDC134-505-001"; tissue "lv|ce";
1	ncSplice	gene	100597986	100641121	.	-	.	gene_id "ENSMMUG00000020726"; gene_name "DPYD"; gene_source "ncSplice"; gene_biotype "protein_coding";
1	ncSplice	transcript	100597986	100641121	.	-	.	gene_id "ENSMMUG00000020726"; transcript_id "rmCircRNA-15"; gene_name "DPYD"; gene_biotype "protein_coding"; transcript_biotype "circRNA"; oId "lv:circDPYD-224-006"; tissue "lv";
1	ncSplice	exon	100597986	100598170	.	-	.	gene_id "ENSMMUG00000020726"; transcript_id "rmCircRNA-15"; exon_number "1" gene_name "DPYD"; gene_biotype "protein_coding"; oId "lv:circDPYD-224-006"; tissue "lv";
1	ncSplice	exon	100621017	100621227	.	-	.	gene_id "ENSMMUG00000020726"; transcript_id "rmCircRNA-15"; exon_number "2" gene_name "DPYD"; gene_biotype "protein_coding"; oId "lv:circDPYD-224-006"; tissue "lv";
1	ncSplice	exon	100639128	100639297	.	-	.	gene_id "ENSMMUG00000020726"; transcript_id "rmCircRNA-15"; exon_number "3" gene_name "DPYD"; gene_biotype "protein_coding"; oId "lv:circDPYD-224-006"; tissue "lv";
1	ncSplice	exon	100641014	100641121	.	-	.	gene_id "ENSMMUG00000020726"; transcript_id "rmCircRNA-15"; exon_number "4" gene_name "DPYD"; gene_biotype "protein_coding"; oId "lv:circDPYD-224-006"; tissue "lv";
1	ncSplice	gene	100724539	100744428	.	-	.	gene_id "ENSMMUG00000020726"; gene_name "DPYD"; gene_source "ncSplice"; gene_biotype "protein_coding";
1	ncSplice	transcript	100724539	100744428	.	-	.	gene_id "ENSMMUG00000020726"; transcript_id "rmCircRNA-16"; gene_name "DPYD"; gene_biotype "protein_coding"; transcript_biotype "circRNA"; oId "lv:circDPYD-227-004"; tissue "lv";
1	ncSplice	exon	100724539	100724626	.	-	.	gene_id "ENSMMUG00000020726"; transcript_id "rmCircRNA-16"; exon_number "1" gene_name "DPYD"; gene_biotype "protein_coding"; oId "lv:circDPYD-227-004"; tissue "lv";
1	ncSplice	exon	100736993	100737074	.	-	.	gene_id "ENSMMUG00000020726"; transcript_id "rmCircRNA-16"; exon_number "2" gene_name "DPYD"; gene_biotype "protein_coding"; oId "lv:circDPYD-227-004"; tissue "lv";
1	ncSplice	exon	100744232	100744428	.	-	.	gene_id "ENSMMUG00000020726"; transcript_id "rmCircRNA-16"; exon_number "3" gene_name "DPYD"; gene_biotype "protein_coding"; oId "lv:circDPYD-227-004"; tissue "lv";
1	ncSplice	gene	102801171	102805290	.	-	.	gene_id "ENSMMUG00000016388"; gene_name "FRRS1"; gene_source "ncSplice"; gene_biotype "protein_coding";
1	ncSplice	transcript	102801171	102805290	.	-	.	gene_id "ENSMMUG00000016388"; transcript_id "rmCircRNA-17"; gene_name "FRRS1"; gene_biotype "protein_coding"; transcript_biotype "circRNA"; oId "lv:circFRRS1-231-001"; tissue "lv";
1	ncSplice	exon	102801171	102801353	.	-	.	gene_id "ENSMMUG00000016388"; transcript_id "rmCircRNA-17"; exon_number "1" gene_name "FRRS1"; gene_biotype "protein_coding"; oId "lv:circFRRS1-231-001"; tissue "lv";
1	ncSplice	exon	102803811	102803958	.	-	.	gene_id "ENSMMUG00000016388"; transcript_id "rmCircRNA-17"; exon_number "2" gene_name "FRRS1"; gene_biotype "protein_coding"; oId "lv:circFRRS1-231-001"; tissue "lv";
1	ncSplice	exon	102805196	102805290	.	-	.	gene_id "ENSMMUG00000016388"; transcript_id "rmCircRNA-17"; exon_number "3" gene_name "FRRS1"; gene_biotype "protein_coding"; oId "lv:circFRRS1-231-001"; tissue "lv";
11	ncSplice	gene	100979905	100989846	.	-	.	gene_id "ENSMMUG00000022406"; gene_name "ANKS1B"; gene_source "ncSplice"; gene_biotype "protein_coding";
11	ncSplice	transcript	100979905	100989846	.	-	.	gene_id "ENSMMUG00000022406"; transcript_id "rmCircRNA-18"; gene_name "ANKS1B"; gene_biotype "protein_coding"; transcript_biotype "circRNA"; oId "lv:circANKS1B-247-001|ce:circANKS1B-590-002"; tissue "lv|ce";
11	ncSplice	exon	100979905	100980071	.	-	.	gene_id "ENSMMUG00000022406"; transcript_id "rmCircRNA-18"; exon_number "1" gene_name "ANKS1B"; gene_biotype "protein_coding"; oId "lv:circANKS1B-247-001|ce:circANKS1B-590-002"; tissue "lv|ce";
11	ncSplice	exon	100983577	100983690	.	-	.	gene_id "ENSMMUG00000022406"; transcript_id "rmCircRNA-18"; exon_number "2" gene_name "ANKS1B"; gene_biotype "protein_coding"; oId "lv:circANKS1B-247-001|ce:circANKS1B-590-002"; tissue "lv|ce";
11	ncSplice	exon	100987574	100987675	.	-	.	gene_id "ENSMMUG00000022406"; transcript_id "rmCircRNA-18"; exon_number "3" gene_name "ANKS1B"; gene_biotype "protein_coding"; oId "lv:circANKS1B-247-001|ce:circANKS1B-590-002"; tissue "lv|ce";
11	ncSplice	exon	100989771	100989846	.	-	.	gene_id "ENSMMUG00000022406"; transcript_id "rmCircRNA-18"; exon_number "4" gene_name "ANKS1B"; gene_biotype "protein_coding"; oId "lv:circANKS1B-247-001|ce:circANKS1B-590-002"; tissue "lv|ce";
11	ncSplice	gene	100979905	101034286	.	-	.	gene_id "ENSMMUG00000022406"; gene_name "ANKS1B"; gene_source "ncSplice"; gene_biotype "protein_coding";
11	ncSplice	transcript	100979905	101034286	.	-	.	gene_id "ENSMMUG00000022406"; transcript_id "rmCircRNA-19"; gene_name "ANKS1B"; gene_biotype "protein_coding"; transcript_biotype "circRNA"; oId "lv:circANKS1B-250-002|ce:circANKS1B-593-010"; tissue "lv|ce";
11	ncSplice	exon	100979905	100980071	.	-	.	gene_id "ENSMMUG00000022406"; transcript_id "rmCircRNA-19"; exon_number "1" gene_name "ANKS1B"; gene_biotype "protein_coding"; oId "lv:circANKS1B-250-002|ce:circANKS1B-593-010"; tissue "lv|ce";
11	ncSplice	exon	100983577	100983690	.	-	.	gene_id "ENSMMUG00000022406"; transcript_id "rmCircRNA-19"; exon_number "2" gene_name "ANKS1B"; gene_biotype "protein_coding"; oId "lv:circANKS1B-250-002|ce:circANKS1B-593-010"; tissue "lv|ce";
11	ncSplice	exon	100987574	100987675	.	-	.	gene_id "ENSMMUG00000022406"; transcript_id "rmCircRNA-19"; exon_number "3" gene_name "ANKS1B"; gene_biotype "protein_coding"; oId "lv:circANKS1B-250-002|ce:circANKS1B-593-010"; tissue "lv|ce";
11	ncSplice	exon	100989771	100989846	.	-	.	gene_id "ENSMMUG00000022406"; transcript_id "rmCircRNA-19"; exon_number "4" gene_name "ANKS1B"; gene_biotype "protein_coding"; oId "lv:circANKS1B-250-002|ce:circANKS1B-593-010"; tissue "lv|ce";
11	ncSplice	exon	101015261	101015557	.	-	.	gene_id "ENSMMUG00000022406"; transcript_id "rmCircRNA-19"; exon_number "5" gene_name "ANKS1B"; gene_biotype "protein_coding"; oId "lv:circANKS1B-250-002|ce:circANKS1B-593-010"; tissue "lv|ce";
11	ncSplice	exon	101021018	101021174	.	-	.	gene_id "ENSMMUG00000022406"; transcript_id "rmCircRNA-19"; exon_number "6" gene_name "ANKS1B"; gene_biotype "protein_coding"; oId "lv:circANKS1B-250-002|ce:circANKS1B-593-010"; tissue "lv|ce";
11	ncSplice	exon	101034206	101034286	.	-	.	gene_id "ENSMMUG00000022406"; transcript_id "rmCircRNA-19"; exon_number "7" gene_name "ANKS1B"; gene_biotype "protein_coding"; oId "lv:circANKS1B-250-002|ce:circANKS1B-593-010"; tissue "lv|ce";
11	ncSplice	gene	101744564	101768707	.	+	.	gene_id "ENSMMUG00000003571"; gene_name "NR1H4"; gene_source "ncSplice"; gene_biotype "protein_coding";
11	ncSplice	transcript	101744564	101768707	.	+	.	gene_id "ENSMMUG00000003571"; transcript_id "rmCircRNA-20"; gene_name "NR1H4"; gene_biotype "protein_coding"; transcript_biotype "circRNA"; oId "lv:circNR1H4-256-004"; tissue "lv";
11	ncSplice	exon	101744564	101744929	.	+	.	gene_id "ENSMMUG00000003571"; transcript_id "rmCircRNA-20"; exon_number "1" gene_name "NR1H4"; gene_biotype "protein_coding"; oId "lv:circNR1H4-256-004"; tissue "lv";
11	ncSplice	exon	101760694	101760846	.	+	.	gene_id "ENSMMUG00000003571"; transcript_id "rmCircRNA-20"; exon_number "2" gene_name "NR1H4"; gene_biotype "protein_coding"; oId "lv:circNR1H4-256-004"; tissue "lv";
11	ncSplice	exon	101762799	101762932	.	+	.	gene_id "ENSMMUG00000003571"; transcript_id "rmCircRNA-20"; exon_number "3" gene_name "NR1H4"; gene_biotype "protein_coding"; oId "lv:circNR1H4-256-004"; tissue "lv";
11	ncSplice	exon	101764398	101764496	.	+	.	gene_id "ENSMMUG00000003571"; transcript_id "rmCircRNA-20"; exon_number "4" gene_name "NR1H4"; gene_biotype "protein_coding"; oId "lv:circNR1H4-256-004"; tissue "lv";
11	ncSplice	exon	101764826	101764925	.	+	.	gene_id "ENSMMUG00000003571"; transcript_id "rmCircRNA-20"; exon_number "5" gene_name "NR1H4"; gene_biotype "protein_coding"; oId "lv:circNR1H4-256-004"; tissue "lv";
11	ncSplice	exon	101768561	101768707	.	+	.	gene_id "ENSMMUG00000003571"; transcript_id "rmCircRNA-20"; exon_number "6" gene_name "NR1H4"; gene_biotype "protein_coding"; oId "lv:circNR1H4-256-004"; tissue "lv";
11	ncSplice	gene	101760694	101768707	.	+	.	gene_id "ENSMMUG00000003571"; gene_name "NR1H4"; gene_source "ncSplice"; gene_biotype "protein_coding";
11	ncSplice	transcript	101760694	101768707	.	+	.	gene_id "ENSMMUG00000003571"; transcript_id "rmCircRNA-21"; gene_name "NR1H4"; gene_biotype "protein_coding"; transcript_biotype "circRNA"; oId "lv:circNR1H4-257-002"; tissue "lv";
11	ncSplice	exon	101760694	101760846	.	+	.	gene_id "ENSMMUG00000003571"; transcript_id "rmCircRNA-21"; exon_number "1" gene_name "NR1H4"; gene_biotype "protein_coding"; oId "lv:circNR1H4-257-002"; tissue "lv";
11	ncSplice	exon	101762799	101762932	.	+	.	gene_id "ENSMMUG00000003571"; transcript_id "rmCircRNA-21"; exon_number "2" gene_name "NR1H4"; gene_biotype "protein_coding"; oId "lv:circNR1H4-257-002"; tissue "lv";
11	ncSplice	exon	101764398	101764496	.	+	.	gene_id "ENSMMUG00000003571"; transcript_id "rmCircRNA-21"; exon_number "3" gene_name "NR1H4"; gene_biotype "protein_coding"; oId "lv:circNR1H4-257-002"; tissue "lv";
11	ncSplice	exon	101764826	101764925	.	+	.	gene_id "ENSMMUG00000003571"; transcript_id "rmCircRNA-21"; exon_number "4" gene_name "NR1H4"; gene_biotype "protein_coding"; oId "lv:circNR1H4-257-002"; tissue "lv";
11	ncSplice	exon	101768561	101768707	.	+	.	gene_id "ENSMMUG00000003571"; transcript_id "rmCircRNA-21"; exon_number "5" gene_name "NR1H4"; gene_biotype "protein_coding"; oId "lv:circNR1H4-257-002"; tissue "lv";
11	ncSplice	gene	110177699	110181788	.	+	.	gene_id "ENSMMUG00000031571"; gene_name "NA"; gene_source "ncSplice"; gene_biotype "protein_coding";
11	ncSplice	transcript	110177699	110181788	.	+	.	gene_id "ENSMMUG00000031571"; transcript_id "rmCircRNA-22"; gene_name "NA"; gene_biotype "protein_coding"; transcript_biotype "circRNA"; oId "lv:circNA-289-001"; tissue "lv";
11	ncSplice	exon	110177699	110177831	.	+	.	gene_id "ENSMMUG00000031571"; transcript_id "rmCircRNA-22"; exon_number "1" gene_name "NA"; gene_biotype "protein_coding"; oId "lv:circNA-289-001"; tissue "lv";
11	ncSplice	exon	110181650	110181788	.	+	.	gene_id "ENSMMUG00000031571"; transcript_id "rmCircRNA-22"; exon_number "2" gene_name "NA"; gene_biotype "protein_coding"; oId "lv:circNA-289-001"; tissue "lv";
11	ncSplice	gene	1141773	1191816	.	+	.	gene_id "ENSMMUG00000010933"; gene_name "ERC1"; gene_source "ncSplice"; gene_biotype "protein_coding";
11	ncSplice	transcript	1141773	1191816	.	+	.	gene_id "ENSMMUG00000010933"; transcript_id "rmCircRNA-23"; gene_name "ERC1"; gene_biotype "protein_coding"; transcript_biotype "circRNA"; oId "lv:circERC1-327-001|ts:circERC1-525-001"; tissue "lv|ts";
11	ncSplice	exon	1141773	1141940	.	+	.	gene_id "ENSMMUG00000010933"; transcript_id "rmCircRNA-23"; exon_number "1" gene_name "ERC1"; gene_biotype "protein_coding"; oId "lv:circERC1-327-001|ts:circERC1-525-001"; tissue "lv|ts";
11	ncSplice	exon	1182343	1182480	.	+	.	gene_id "ENSMMUG00000010933"; transcript_id "rmCircRNA-23"; exon_number "2" gene_name "ERC1"; gene_biotype "protein_coding"; oId "lv:circERC1-327-001|ts:circERC1-525-001"; tissue "lv|ts";
11	ncSplice	exon	1183733	1183873	.	+	.	gene_id "ENSMMUG00000010933"; transcript_id "rmCircRNA-23"; exon_number "3" gene_name "ERC1"; gene_biotype "protein_coding"; oId "lv:circERC1-327-001|ts:circERC1-525-001"; tissue "lv|ts";
11	ncSplice	exon	1185101	1185241	.	+	.	gene_id "ENSMMUG00000010933"; transcript_id "rmCircRNA-23"; exon_number "4" gene_name "ERC1"; gene_biotype "protein_coding"; oId "lv:circERC1-327-001|ts:circERC1-525-001"; tissue "lv|ts";
11	ncSplice	exon	1191623	1191816	.	+	.	gene_id "ENSMMUG00000010933"; transcript_id "rmCircRNA-23"; exon_number "5" gene_name "ERC1"; gene_biotype "protein_coding"; oId "lv:circERC1-327-001|ts:circERC1-525-001"; tissue "lv|ts";
11	ncSplice	gene	115793325	115800706	.	+	.	gene_id "11:115793324:115800706:1"; gene_name "11:115793324:115800706:1"; gene_source "ncSplice"; gene_biotype "novel";
11	ncSplice	transcript	115793325	115800706	.	+	.	gene_id "11:115793324:115800706:1"; transcript_id "rmCircRNA-24"; gene_name "11:115793324:115800706:1"; gene_biotype "novel"; transcript_biotype "circRNA"; oId "lv:circ11:115793324:115800706:1-330-002"; tissue "lv";
11	ncSplice	exon	115793325	115793430	.	+	.	gene_id "11:115793324:115800706:1"; transcript_id "rmCircRNA-24"; exon_number "1" gene_name "11:115793324:115800706:1"; gene_biotype "novel"; oId "lv:circ11:115793324:115800706:1-330-002"; tissue "lv";
11	ncSplice	exon	115800513	115800706	.	+	.	gene_id "11:115793324:115800706:1"; transcript_id "rmCircRNA-24"; exon_number "2" gene_name "11:115793324:115800706:1"; gene_biotype "novel"; oId "lv:circ11:115793324:115800706:1-330-002"; tissue "lv";
11	ncSplice	gene	1182343	1191816	.	+	.	gene_id "ENSMMUG00000010933"; gene_name "ERC1"; gene_source "ncSplice"; gene_biotype "protein_coding";
11	ncSplice	transcript	1182343	1191816	.	+	.	gene_id "ENSMMUG00000010933"; transcript_id "rmCircRNA-25"; gene_name "ERC1"; gene_biotype "protein_coding"; transcript_biotype "circRNA"; oId "lv:circERC1-338-001|ce:circERC1-796-001|ts:circERC1-546-001"; tissue "lv|ce|ts";
11	ncSplice	exon	1182343	1182480	.	+	.	gene_id "ENSMMUG00000010933"; transcript_id "rmCircRNA-25"; exon_number "1" gene_name "ERC1"; gene_biotype "protein_coding"; oId "lv:circERC1-338-001|ce:circERC1-796-001|ts:circERC1-546-001"; tissue "lv|ce|ts";
11	ncSplice	exon	1183733	1183873	.	+	.	gene_id "ENSMMUG00000010933"; transcript_id "rmCircRNA-25"; exon_number "2" gene_name "ERC1"; gene_biotype "protein_coding"; oId "lv:circERC1-338-001|ce:circERC1-796-001|ts:circERC1-546-001"; tissue "lv|ce|ts";
11	ncSplice	exon	1185101	1185241	.	+	.	gene_id "ENSMMUG00000010933"; transcript_id "rmCircRNA-25"; exon_number "3" gene_name "ERC1"; gene_biotype "protein_coding"; oId "lv:circERC1-338-001|ce:circERC1-796-001|ts:circERC1-546-001"; tissue "lv|ce|ts";
11	ncSplice	exon	1191623	1191816	.	+	.	gene_id "ENSMMUG00000010933"; transcript_id "rmCircRNA-25"; exon_number "4" gene_name "ERC1"; gene_biotype "protein_coding"; oId "lv:circERC1-338-001|ce:circERC1-796-001|ts:circERC1-546-001"; tissue "lv|ce|ts";
11	ncSplice	gene	121824432	121826396	.	-	.	gene_id "ENSMMUG00000020650"; gene_name "SPPL3"; gene_source "ncSplice"; gene_biotype "protein_coding";
11	ncSplice	transcript	121824432	121826396	.	-	.	gene_id "ENSMMUG00000020650"; transcript_id "rmCircRNA-26"; gene_name "SPPL3"; gene_biotype "protein_coding"; transcript_biotype "circRNA"; oId "lv:circSPPL3-346-001|ce:circSPPL3-831-001|ts:circSPPL3-571-001"; tissue "lv|ce|ts";
11	ncSplice	exon	121824432	121824544	.	-	.	gene_id "ENSMMUG00000020650"; transcript_id "rmCircRNA-26"; exon_number "1" gene_name "SPPL3"; gene_biotype "protein_coding"; oId "lv:circSPPL3-346-001|ce:circSPPL3-831-001|ts:circSPPL3-571-001"; tissue "lv|ce|ts";
11	ncSplice	exon	121825460	121825538	.	-	.	gene_id "ENSMMUG00000020650"; transcript_id "rmCircRNA-26"; exon_number "2" gene_name "SPPL3"; gene_biotype "protein_coding"; oId "lv:circSPPL3-346-001|ce:circSPPL3-831-001|ts:circSPPL3-571-001"; tissue "lv|ce|ts";
11	ncSplice	exon	121826277	121826396	.	-	.	gene_id "ENSMMUG00000020650"; transcript_id "rmCircRNA-26"; exon_number "3" gene_name "SPPL3"; gene_biotype "protein_coding"; oId "lv:circSPPL3-346-001|ce:circSPPL3-831-001|ts:circSPPL3-571-001"; tissue "lv|ce|ts";
11	ncSplice	gene	124869511	124873111	.	+	.	gene_id "ENSMMUG00000031491"; gene_name "TMED2"; gene_source "ncSplice"; gene_biotype "protein_coding";
11	ncSplice	transcript	124869511	124873111	.	+	.	gene_id "ENSMMUG00000031491"; transcript_id "rmCircRNA-27"; gene_name "TMED2"; gene_biotype "protein_coding"; transcript_biotype "circRNA"; oId "lv:circTMED2-366-001|ce:circTMED2-878-002|ts:circTMED2-619-001"; tissue "lv|ce|ts";
11	ncSplice	exon	124869511	124869703	.	+	.	gene_id "ENSMMUG00000031491"; transcript_id "rmCircRNA-27"; exon_number "1" gene_name "TMED2"; gene_biotype "protein_coding"; oId "lv:circTMED2-366-001|ce:circTMED2-878-002|ts:circTMED2-619-001"; tissue "lv|ce|ts";
11	ncSplice	exon	124873004	124873111	.	+	.	gene_id "ENSMMUG00000031491"; transcript_id "rmCircRNA-27"; exon_number "2" gene_name "TMED2"; gene_biotype "protein_coding"; oId "lv:circTMED2-366-001|ce:circTMED2-878-002|ts:circTMED2-619-001"; tissue "lv|ce|ts";
1	ncSplice	gene	115533545	115609948	.	-	.	gene_id "ENSMMUG00000007766"; gene_name "ST7L"; gene_source "ncSplice"; gene_biotype "protein_coding";
1	ncSplice	transcript	115533545	115609948	.	-	.	gene_id "ENSMMUG00000007766"; transcript_id "rmCircRNA-28"; gene_name "ST7L"; gene_biotype "protein_coding"; transcript_biotype "circRNA"; oId "lv:circST7L-398-111"; tissue "lv";
1	ncSplice	exon	115533545	115533684	.	-	.	gene_id "ENSMMUG00000007766"; transcript_id "rmCircRNA-28"; exon_number "1" gene_name "ST7L"; gene_biotype "protein_coding"; oId "lv:circST7L-398-111"; tissue "lv";
1	ncSplice	exon	115548240	115548390	.	-	.	gene_id "ENSMMUG00000007766"; transcript_id "rmCircRNA-28"; exon_number "2" gene_name "ST7L"; gene_biotype "protein_coding"; oId "lv:circST7L-398-111"; tissue "lv";
1	ncSplice	exon	115574978	115575075	.	-	.	gene_id "ENSMMUG00000007766"; transcript_id "rmCircRNA-28"; exon_number "3" gene_name "ST7L"; gene_biotype "protein_coding"; oId "lv:circST7L-398-111"; tissue "lv";
1	ncSplice	exon	115576559	115576713	.	-	.	gene_id "ENSMMUG00000007766"; transcript_id "rmCircRNA-28"; exon_number "4" gene_name "ST7L"; gene_biotype "protein_coding"; oId "lv:circST7L-398-111"; tissue "lv";
1	ncSplice	exon	115591315	115591430	.	-	.	gene_id "ENSMMUG00000007766"; transcript_id "rmCircRNA-28"; exon_number "5" gene_name "ST7L"; gene_biotype "protein_coding"; oId "lv:circST7L-398-111"; tissue "lv";
1	ncSplice	exon	115593887	115593941	.	-	.	gene_id "ENSMMUG00000007766"; transcript_id "rmCircRNA-28"; exon_number "6" gene_name "ST7L"; gene_biotype "protein_coding"; oId "lv:circST7L-398-111"; tissue "lv";
1	ncSplice	exon	115603586	115603748	.	-	.	gene_id "ENSMMUG00000007766"; transcript_id "rmCircRNA-28"; exon_number "7" gene_name "ST7L"; gene_biotype "protein_coding"; oId "lv:circST7L-398-111"; tissue "lv";
1	ncSplice	exon	115609866	115609948	.	-	.	gene_id "ENSMMUG00000007766"; transcript_id "rmCircRNA-28"; exon_number "8" gene_name "ST7L"; gene_biotype "protein_coding"; oId "lv:circST7L-398-111"; tissue "lv";
1	ncSplice	gene	115574596	115609948	.	-	.	gene_id "ENSMMUG00000007766"; gene_name "ST7L"; gene_source "ncSplice"; gene_biotype "protein_coding";
1	ncSplice	transcript	115574596	115609948	.	-	.	gene_id "ENSMMUG00000007766"; transcript_id "rmCircRNA-29"; gene_name "ST7L"; gene_biotype "protein_coding"; transcript_biotype "circRNA"; oId "lv:circST7L-404-020|ce:circST7L-949-075"; tissue "lv|ce";
1	ncSplice	exon	115574596	115574710	.	-	.	gene_id "ENSMMUG00000007766"; transcript_id "rmCircRNA-29"; exon_number "1" gene_name "ST7L"; gene_biotype "protein_coding"; oId "lv:circST7L-404-020|ce:circST7L-949-075"; tissue "lv|ce";
1	ncSplice	exon	115576559	115576713	.	-	.	gene_id "ENSMMUG00000007766"; transcript_id "rmCircRNA-29"; exon_number "2" gene_name "ST7L"; gene_biotype "protein_coding"; oId "lv:circST7L-404-020|ce:circST7L-949-075"; tissue "lv|ce";
1	ncSplice	exon	115591315	115591430	.	-	.	gene_id "ENSMMUG00000007766"; transcript_id "rmCircRNA-29"; exon_number "3" gene_name "ST7L"; gene_biotype "protein_coding"; oId "lv:circST7L-404-020|ce:circST7L-949-075"; tissue "lv|ce";
1	ncSplice	exon	115593887	115593941	.	-	.	gene_id "ENSMMUG00000007766"; transcript_id "rmCircRNA-29"; exon_number "4" gene_name "ST7L"; gene_biotype "protein_coding"; oId "lv:circST7L-404-020|ce:circST7L-949-075"; tissue "lv|ce";
1	ncSplice	exon	115603586	115603748	.	-	.	gene_id "ENSMMUG00000007766"; transcript_id "rmCircRNA-29"; exon_number "5" gene_name "ST7L"; gene_biotype "protein_coding"; oId "lv:circST7L-404-020|ce:circST7L-949-075"; tissue "lv|ce";
1	ncSplice	exon	115609866	115609948	.	-	.	gene_id "ENSMMUG00000007766"; transcript_id "rmCircRNA-29"; exon_number "6" gene_name "ST7L"; gene_biotype "protein_coding"; oId "lv:circST7L-404-020|ce:circST7L-949-075"; tissue "lv|ce";
1	ncSplice	gene	115591315	115609948	.	-	.	gene_id "ENSMMUG00000007766"; gene_name "ST7L"; gene_source "ncSplice"; gene_biotype "protein_coding";
1	ncSplice	transcript	115591315	115609948	.	-	.	gene_id "ENSMMUG00000007766"; transcript_id "rmCircRNA-30"; gene_name "ST7L"; gene_biotype "protein_coding"; transcript_biotype "circRNA"; oId "lv:circST7L-409-001|ce:circST7L-955-001|ts:circST7L-687-001"; tissue "lv|ce|ts";
1	ncSplice	exon	115591315	115591430	.	-	.	gene_id "ENSMMUG00000007766"; transcript_id "rmCircRNA-30"; exon_number "1" gene_name "ST7L"; gene_biotype "protein_coding"; oId "lv:circST7L-409-001|ce:circST7L-955-001|ts:circST7L-687-001"; tissue "lv|ce|ts";
1	ncSplice	exon	115593887	115593941	.	-	.	gene_id "ENSMMUG00000007766"; transcript_id "rmCircRNA-30"; exon_number "2" gene_name "ST7L"; gene_biotype "protein_coding"; oId "lv:circST7L-409-001|ce:circST7L-955-001|ts:circST7L-687-001"; tissue "lv|ce|ts";
1	ncSplice	exon	115603586	115603748	.	-	.	gene_id "ENSMMUG00000007766"; transcript_id "rmCircRNA-30"; exon_number "3" gene_name "ST7L"; gene_biotype "protein_coding"; oId "lv:circST7L-409-001|ce:circST7L-955-001|ts:circST7L-687-001"; tissue "lv|ce|ts";
1	ncSplice	exon	115609866	115609948	.	-	.	gene_id "ENSMMUG00000007766"; transcript_id "rmCircRNA-30"; exon_number "4" gene_name "ST7L"; gene_biotype "protein_coding"; oId "lv:circST7L-409-001|ce:circST7L-955-001|ts:circST7L-687-001"; tissue "lv|ce|ts";
1	ncSplice	gene	11564081	11579520	.	-	.	gene_id "ENSMMUG00000021399"; gene_name "RERE"; gene_source "ncSplice"; gene_biotype "protein_coding";
1	ncSplice	transcript	11564081	11579520	.	-	.	gene_id "ENSMMUG00000021399"; transcript_id "rmCircRNA-31"; gene_name "RERE"; gene_biotype "protein_coding"; transcript_biotype "circRNA"; oId "lv:circRERE-412-001|ce:circRERE-960-001|ts:circRERE-690-001"; tissue "lv|ce|ts";
1	ncSplice	exon	11564081	11564185	.	-	.	gene_id "ENSMMUG00000021399"; transcript_id "rmCircRNA-31"; exon_number "1" gene_name "RERE"; gene_biotype "protein_coding"; oId "lv:circRERE-412-001|ce:circRERE-960-001|ts:circRERE-690-001"; tissue "lv|ce|ts";
1	ncSplice	exon	11578461	11578557	.	-	.	gene_id "ENSMMUG00000021399"; transcript_id "rmCircRNA-31"; exon_number "2" gene_name "RERE"; gene_biotype "protein_coding"; oId "lv:circRERE-412-001|ce:circRERE-960-001|ts:circRERE-690-001"; tissue "lv|ce|ts";
1	ncSplice	exon	11579415	11579520	.	-	.	gene_id "ENSMMUG00000021399"; transcript_id "rmCircRNA-31"; exon_number "3" gene_name "RERE"; gene_biotype "protein_coding"; oId "lv:circRERE-412-001|ce:circRERE-960-001|ts:circRERE-690-001"; tissue "lv|ce|ts";
1	ncSplice	gene	11564081	11637812	.	-	.	gene_id "ENSMMUG00000021399"; gene_name "RERE"; gene_source "ncSplice"; gene_biotype "protein_coding";
1	ncSplice	transcript	11564081	11637812	.	-	.	gene_id "ENSMMUG00000021399"; transcript_id "rmCircRNA-32"; gene_name "RERE"; gene_biotype "protein_coding"; transcript_biotype "circRNA"; oId "lv:circRERE-414-005|ce:circRERE-962-012|ts:circRERE-691-016"; tissue "lv|ce|ts";
1	ncSplice	exon	11564081	11564185	.	-	.	gene_id "ENSMMUG00000021399"; transcript_id "rmCircRNA-32"; exon_number "1" gene_name "RERE"; gene_biotype "protein_coding"; oId "lv:circRERE-414-005|ce:circRERE-962-012|ts:circRERE-691-016"; tissue "lv|ce|ts";
1	ncSplice	exon	11578461	11578557	.	-	.	gene_id "ENSMMUG00000021399"; transcript_id "rmCircRNA-32"; exon_number "2" gene_name "RERE"; gene_biotype "protein_coding"; oId "lv:circRERE-414-005|ce:circRERE-962-012|ts:circRERE-691-016"; tissue "lv|ce|ts";
1	ncSplice	exon	11579415	11579520	.	-	.	gene_id "ENSMMUG00000021399"; transcript_id "rmCircRNA-32"; exon_number "3" gene_name "RERE"; gene_biotype "protein_coding"; oId "lv:circRERE-414-005|ce:circRERE-962-012|ts:circRERE-691-016"; tissue "lv|ce|ts";
1	ncSplice	exon	11637687	11637812	.	-	.	gene_id "ENSMMUG00000021399"; transcript_id "rmCircRNA-32"; exon_number "4" gene_name "RERE"; gene_biotype "protein_coding"; oId "lv:circRERE-414-005|ce:circRERE-962-012|ts:circRERE-691-016"; tissue "lv|ce|ts";
1	ncSplice	gene	120368310	120381060	.	+	.	gene_id "ENSMMUG00000021685"; gene_name "MAN1A2"; gene_source "ncSplice"; gene_biotype "protein_coding";
1	ncSplice	transcript	120368310	120381060	.	+	.	gene_id "ENSMMUG00000021685"; transcript_id "rmCircRNA-33"; gene_name "MAN1A2"; gene_biotype "protein_coding"; transcript_biotype "circRNA"; oId "lv:circMAN1A2-449-001|ce:circMAN1A2-1007-001|ts:circMAN1A2-735-002"; tissue "lv|ce|ts";
1	ncSplice	exon	120368310	120368565	.	+	.	gene_id "ENSMMUG00000021685"; transcript_id "rmCircRNA-33"; exon_number "1" gene_name "MAN1A2"; gene_biotype "protein_coding"; oId "lv:circMAN1A2-449-001|ce:circMAN1A2-1007-001|ts:circMAN1A2-735-002"; tissue "lv|ce|ts";
1	ncSplice	exon	120371685	120371785	.	+	.	gene_id "ENSMMUG00000021685"; transcript_id "rmCircRNA-33"; exon_number "2" gene_name "MAN1A2"; gene_biotype "protein_coding"; oId "lv:circMAN1A2-449-001|ce:circMAN1A2-1007-001|ts:circMAN1A2-735-002"; tissue "lv|ce|ts";
1	ncSplice	exon	120380946	120381060	.	+	.	gene_id "ENSMMUG00000021685"; transcript_id "rmCircRNA-33"; exon_number "3" gene_name "MAN1A2"; gene_biotype "protein_coding"; oId "lv:circMAN1A2-449-001|ce:circMAN1A2-1007-001|ts:circMAN1A2-735-002"; tissue "lv|ce|ts";
1	ncSplice	gene	120368310	120386868	.	+	.	gene_id "ENSMMUG00000021685"; gene_name "MAN1A2"; gene_source "ncSplice"; gene_biotype "protein_coding";
1	ncSplice	transcript	120368310	120386868	.	+	.	gene_id "ENSMMUG00000021685"; transcript_id "rmCircRNA-34"; gene_name "MAN1A2"; gene_biotype "protein_coding"; transcript_biotype "circRNA"; oId "lv:circMAN1A2-450-002|ts:circMAN1A2-736-012"; tissue "lv|ts";
1	ncSplice	exon	120368310	120368565	.	+	.	gene_id "ENSMMUG00000021685"; transcript_id "rmCircRNA-34"; exon_number "1" gene_name "MAN1A2"; gene_biotype "protein_coding"; oId "lv:circMAN1A2-450-002|ts:circMAN1A2-736-012"; tissue "lv|ts";
1	ncSplice	exon	120371685	120371785	.	+	.	gene_id "ENSMMUG00000021685"; transcript_id "rmCircRNA-34"; exon_number "2" gene_name "MAN1A2"; gene_biotype "protein_coding"; oId "lv:circMAN1A2-450-002|ts:circMAN1A2-736-012"; tissue "lv|ts";
1	ncSplice	exon	120380946	120381060	.	+	.	gene_id "ENSMMUG00000021685"; transcript_id "rmCircRNA-34"; exon_number "3" gene_name "MAN1A2"; gene_biotype "protein_coding"; oId "lv:circMAN1A2-450-002|ts:circMAN1A2-736-012"; tissue "lv|ts";
1	ncSplice	exon	120386788	120386868	.	+	.	gene_id "ENSMMUG00000021685"; transcript_id "rmCircRNA-34"; exon_number "4" gene_name "MAN1A2"; gene_biotype "protein_coding"; oId "lv:circMAN1A2-450-002|ts:circMAN1A2-736-012"; tissue "lv|ts";
11	ncSplice	gene	22188394	22201342	.	-	.	gene_id "ENSMMUG00000020806"; gene_name "ABCC9"; gene_source "ncSplice"; gene_biotype "protein_coding";
11	ncSplice	transcript	22188394	22201342	.	-	.	gene_id "ENSMMUG00000020806"; transcript_id "rmCircRNA-35"; gene_name "ABCC9"; gene_biotype "protein_coding"; transcript_biotype "circRNA"; oId "lv:circABCC9-461-002"; tissue "lv";
11	ncSplice	exon	22188394	22188496	.	-	.	gene_id "ENSMMUG00000020806"; transcript_id "rmCircRNA-35"; exon_number "1" gene_name "ABCC9"; gene_biotype "protein_coding"; oId "lv:circABCC9-461-002"; tissue "lv";
11	ncSplice	exon	22196991	22197083	.	-	.	gene_id "ENSMMUG00000020806"; transcript_id "rmCircRNA-35"; exon_number "2" gene_name "ABCC9"; gene_biotype "protein_coding"; oId "lv:circABCC9-461-002"; tissue "lv";
11	ncSplice	exon	22201185	22201342	.	-	.	gene_id "ENSMMUG00000020806"; transcript_id "rmCircRNA-35"; exon_number "3" gene_name "ABCC9"; gene_biotype "protein_coding"; oId "lv:circABCC9-461-002"; tissue "lv";
11	ncSplice	gene	22282657	22295797	.	-	.	gene_id "ENSMMUG00000020806"; gene_name "ABCC9"; gene_source "ncSplice"; gene_biotype "protein_coding";
11	ncSplice	transcript	22282657	22295797	.	-	.	gene_id "ENSMMUG00000020806"; transcript_id "rmCircRNA-36"; gene_name "ABCC9"; gene_biotype "protein_coding"; transcript_biotype "circRNA"; oId "lv:circABCC9-463-003"; tissue "lv";
11	ncSplice	exon	22282657	22282778	.	-	.	gene_id "ENSMMUG00000020806"; transcript_id "rmCircRNA-36"; exon_number "1" gene_name "ABCC9"; gene_biotype "protein_coding"; oId "lv:circABCC9-463-003"; tissue "lv";
11	ncSplice	exon	22288749	22288890	.	-	.	gene_id "ENSMMUG00000020806"; transcript_id "rmCircRNA-36"; exon_number "2" gene_name "ABCC9"; gene_biotype "protein_coding"; oId "lv:circABCC9-463-003"; tissue "lv";
11	ncSplice	exon	22291445	22291606	.	-	.	gene_id "ENSMMUG00000020806"; transcript_id "rmCircRNA-36"; exon_number "3" gene_name "ABCC9"; gene_biotype "protein_coding"; oId "lv:circABCC9-463-003"; tissue "lv";
11	ncSplice	exon	22295682	22295797	.	-	.	gene_id "ENSMMUG00000020806"; transcript_id "rmCircRNA-36"; exon_number "4" gene_name "ABCC9"; gene_biotype "protein_coding"; oId "lv:circABCC9-463-003"; tissue "lv";
11	ncSplice	gene	24110303	24160190	.	-	.	gene_id "ENSMMUG00000020370"; gene_name "SOX5"; gene_source "ncSplice"; gene_biotype "protein_coding";
11	ncSplice	transcript	24110303	24160190	.	-	.	gene_id "ENSMMUG00000020370"; transcript_id "rmCircRNA-37"; gene_name "SOX5"; gene_biotype "protein_coding"; transcript_biotype "circRNA"; oId "lv:circSOX5-471-001"; tissue "lv";
11	ncSplice	exon	24110303	24110513	.	-	.	gene_id "ENSMMUG00000020370"; transcript_id "rmCircRNA-37"; exon_number "1" gene_name "SOX5"; gene_biotype "protein_coding"; oId "lv:circSOX5-471-001"; tissue "lv";
11	ncSplice	exon	24160064	24160190	.	-	.	gene_id "ENSMMUG00000020370"; transcript_id "rmCircRNA-37"; exon_number "2" gene_name "SOX5"; gene_biotype "protein_coding"; oId "lv:circSOX5-471-001"; tissue "lv";
11	ncSplice	gene	24279761	24279996	.	-	.	gene_id "11:24279760:24279996:-1"; gene_name "11:24279760:24279996:-1"; gene_source "ncSplice"; gene_biotype "novel";
11	ncSplice	transcript	24279761	24279996	.	-	.	gene_id "11:24279760:24279996:-1"; transcript_id "rmCircRNA-38"; gene_name "11:24279760:24279996:-1"; gene_biotype "novel"; transcript_biotype "circRNA"; oId "lv:circ11:24279760:24279996:-1-472-001"; tissue "lv";
11	ncSplice	exon	24279761	24279832	.	-	.	gene_id "11:24279760:24279996:-1"; transcript_id "rmCircRNA-38"; exon_number "1" gene_name "11:24279760:24279996:-1"; gene_biotype "novel"; oId "lv:circ11:24279760:24279996:-1-472-001"; tissue "lv";
11	ncSplice	exon	24279922	24279996	.	-	.	gene_id "11:24279760:24279996:-1"; transcript_id "rmCircRNA-38"; exon_number "2" gene_name "11:24279760:24279996:-1"; gene_biotype "novel"; oId "lv:circ11:24279760:24279996:-1-472-001"; tissue "lv";
11	ncSplice	gene	26917152	26928057	.	-	.	gene_id "ENSMMUG00000023128"; gene_name "ITPR2"; gene_source "ncSplice"; gene_biotype "protein_coding";
11	ncSplice	transcript	26917152	26928057	.	-	.	gene_id "ENSMMUG00000023128"; transcript_id "rmCircRNA-39"; gene_name "ITPR2"; gene_biotype "protein_coding"; transcript_biotype "circRNA"; oId "lv:circITPR2-492-001"; tissue "lv";
11	ncSplice	exon	26917152	26917325	.	-	.	gene_id "ENSMMUG00000023128"; transcript_id "rmCircRNA-39"; exon_number "1" gene_name "ITPR2"; gene_biotype "protein_coding"; oId "lv:circITPR2-492-001"; tissue "lv";
11	ncSplice	exon	26918271	26918436	.	-	.	gene_id "ENSMMUG00000023128"; transcript_id "rmCircRNA-39"; exon_number "2" gene_name "ITPR2"; gene_biotype "protein_coding"; oId "lv:circITPR2-492-001"; tissue "lv";
11	ncSplice	exon	26920316	26920373	.	-	.	gene_id "ENSMMUG00000023128"; transcript_id "rmCircRNA-39"; exon_number "3" gene_name "ITPR2"; gene_biotype "protein_coding"; oId "lv:circITPR2-492-001"; tissue "lv";
11	ncSplice	exon	26924066	26924195	.	-	.	gene_id "ENSMMUG00000023128"; transcript_id "rmCircRNA-39"; exon_number "4" gene_name "ITPR2"; gene_biotype "protein_coding"; oId "lv:circITPR2-492-001"; tissue "lv";
11	ncSplice	exon	26927864	26928057	.	-	.	gene_id "ENSMMUG00000023128"; transcript_id "rmCircRNA-39"; exon_number "5" gene_name "ITPR2"; gene_biotype "protein_coding"; oId "lv:circITPR2-492-001"; tissue "lv";
1	ncSplice	gene	129435170	129436233	.	+	.	gene_id "ENSMMUG00000010068"; gene_name "PRUNE"; gene_source "ncSplice"; gene_biotype "protein_coding";
1	ncSplice	transcript	129435170	129436233	.	+	.	gene_id "ENSMMUG00000010068"; transcript_id "rmCircRNA-40"; gene_name "PRUNE"; gene_biotype "protein_coding"; transcript_biotype "circRNA"; oId "lv:circPRUNE-509-001|ce:circPRUNE-1098-001"; tissue "lv|ce";
1	ncSplice	exon	129435170	129435354	.	+	.	gene_id "ENSMMUG00000010068"; transcript_id "rmCircRNA-40"; exon_number "1" gene_name "PRUNE"; gene_biotype "protein_coding"; oId "lv:circPRUNE-509-001|ce:circPRUNE-1098-001"; tissue "lv|ce";
1	ncSplice	exon	129436075	129436233	.	+	.	gene_id "ENSMMUG00000010068"; transcript_id "rmCircRNA-40"; exon_number "2" gene_name "PRUNE"; gene_biotype "protein_coding"; oId "lv:circPRUNE-509-001|ce:circPRUNE-1098-001"; tissue "lv|ce";
1	ncSplice	gene	132759867	132760570	.	+	.	gene_id "ENSMMUG00000010810"; gene_name "UBAP2L"; gene_source "ncSplice"; gene_biotype "protein_coding";
1	ncSplice	transcript	132759867	132760570	.	+	.	gene_id "ENSMMUG00000010810"; transcript_id "rmCircRNA-41"; gene_name "UBAP2L"; gene_biotype "protein_coding"; transcript_biotype "circRNA"; oId "lv:circUBAP2L-546-001|ce:circUBAP2L-1192-001|ts:circUBAP2L-866-001"; tissue "lv|ce|ts";
1	ncSplice	exon	132759867	132760068	.	+	.	gene_id "ENSMMUG00000010810"; transcript_id "rmCircRNA-41"; exon_number "1" gene_name "UBAP2L"; gene_biotype "protein_coding"; oId "lv:circUBAP2L-546-001|ce:circUBAP2L-1192-001|ts:circUBAP2L-866-001"; tissue "lv|ce|ts";
1	ncSplice	exon	132760475	132760570	.	+	.	gene_id "ENSMMUG00000010810"; transcript_id "rmCircRNA-41"; exon_number "2" gene_name "UBAP2L"; gene_biotype "protein_coding"; oId "lv:circUBAP2L-546-001|ce:circUBAP2L-1192-001|ts:circUBAP2L-866-001"; tissue "lv|ce|ts";
1	ncSplice	gene	132778218	132778832	.	+	.	gene_id "ENSMMUG00000010810"; gene_name "UBAP2L"; gene_source "ncSplice"; gene_biotype "protein_coding";
1	ncSplice	transcript	132778218	132778832	.	+	.	gene_id "ENSMMUG00000010810"; transcript_id "rmCircRNA-42"; gene_name "UBAP2L"; gene_biotype "protein_coding"; transcript_biotype "circRNA"; oId "lv:circUBAP2L-547-001|ts:circUBAP2L-867-001"; tissue "lv|ts";
1	ncSplice	exon	132778218	132778495	.	+	.	gene_id "ENSMMUG00000010810"; transcript_id "rmCircRNA-42"; exon_number "1" gene_name "UBAP2L"; gene_biotype "protein_coding"; oId "lv:circUBAP2L-547-001|ts:circUBAP2L-867-001"; tissue "lv|ts";
1	ncSplice	exon	132778660	132778832	.	+	.	gene_id "ENSMMUG00000010810"; transcript_id "rmCircRNA-42"; exon_number "2" gene_name "UBAP2L"; gene_biotype "protein_coding"; oId "lv:circUBAP2L-547-001|ts:circUBAP2L-867-001"; tissue "lv|ts";
1	ncSplice	gene	133960417	134018370	.	-	.	gene_id "ENSMMUG00000037210"; gene_name "snoU13"; gene_source "ncSplice"; gene_biotype "snoRNA";
1	ncSplice	transcript	133960417	134018370	.	-	.	gene_id "ENSMMUG00000037210"; transcript_id "rmCircRNA-43"; gene_name "snoU13"; gene_biotype "snoRNA"; transcript_biotype "circRNA"; oId "lv:circsnoU13-557-012|ce:circsnoU13-1231-028|ts:circsnoU13-889-540"; tissue "lv|ce|ts";
1	ncSplice	exon	133960417	133960511	.	-	.	gene_id "ENSMMUG00000037210"; transcript_id "rmCircRNA-43"; exon_number "1" gene_name "snoU13"; gene_biotype "snoRNA"; oId "lv:circsnoU13-557-012|ce:circsnoU13-1231-028|ts:circsnoU13-889-540"; tissue "lv|ce|ts";
1	ncSplice	exon	133975411	133975589	.	-	.	gene_id "ENSMMUG00000037210"; transcript_id "rmCircRNA-43"; exon_number "2" gene_name "snoU13"; gene_biotype "snoRNA"; oId "lv:circsnoU13-557-012|ce:circsnoU13-1231-028|ts:circsnoU13-889-540"; tissue "lv|ce|ts";
1	ncSplice	exon	133995849	133996590	.	-	.	gene_id "ENSMMUG00000037210"; transcript_id "rmCircRNA-43"; exon_number "3" gene_name "snoU13"; gene_biotype "snoRNA"; oId "lv:circsnoU13-557-012|ce:circsnoU13-1231-028|ts:circsnoU13-889-540"; tissue "lv|ce|ts";
1	ncSplice	exon	134018269	134018370	.	-	.	gene_id "ENSMMUG00000037210"; transcript_id "rmCircRNA-43"; exon_number "4" gene_name "snoU13"; gene_biotype "snoRNA"; oId "lv:circsnoU13-557-012|ce:circsnoU13-1231-028|ts:circsnoU13-889-540"; tissue "lv|ce|ts";
1	ncSplice	gene	133975411	134018370	.	-	.	gene_id "1:133975410:134018370:-1"; gene_name "1:133975410:134018370:-1"; gene_source "ncSplice"; gene_biotype "novel";
1	ncSplice	transcript	133975411	134018370	.	-	.	gene_id "1:133975410:134018370:-1"; transcript_id "rmCircRNA-44"; gene_name "1:133975410:134018370:-1"; gene_biotype "novel"; transcript_biotype "circRNA"; oId "lv:circ1:133975410:134018370:-1-558-012|ce:circ1:133975410:134018370:-1-1235-014|ts:circ1:133975410:134018370:-1-892-135"; tissue "lv|ce|ts";
1	ncSplice	exon	133975411	133975589	.	-	.	gene_id "1:133975410:134018370:-1"; transcript_id "rmCircRNA-44"; exon_number "1" gene_name "1:133975410:134018370:-1"; gene_biotype "novel"; oId "lv:circ1:133975410:134018370:-1-558-012|ce:circ1:133975410:134018370:-1-1235-014|ts:circ1:133975410:134018370:-1-892-135"; tissue "lv|ce|ts";
1	ncSplice	exon	133995849	133996590	.	-	.	gene_id "1:133975410:134018370:-1"; transcript_id "rmCircRNA-44"; exon_number "2" gene_name "1:133975410:134018370:-1"; gene_biotype "novel"; oId "lv:circ1:133975410:134018370:-1-558-012|ce:circ1:133975410:134018370:-1-1235-014|ts:circ1:133975410:134018370:-1-892-135"; tissue "lv|ce|ts";
1	ncSplice	exon	134018269	134018370	.	-	.	gene_id "1:133975410:134018370:-1"; transcript_id "rmCircRNA-44"; exon_number "3" gene_name "1:133975410:134018370:-1"; gene_biotype "novel"; oId "lv:circ1:133975410:134018370:-1-558-012|ce:circ1:133975410:134018370:-1-1235-014|ts:circ1:133975410:134018370:-1-892-135"; tissue "lv|ce|ts";
1	ncSplice	gene	133995849	134018370	.	-	.	gene_id "1:133995848:134018370:-1"; gene_name "1:133995848:134018370:-1"; gene_source "ncSplice"; gene_biotype "novel";
1	ncSplice	transcript	133995849	134018370	.	-	.	gene_id "1:133995848:134018370:-1"; transcript_id "rmCircRNA-45"; gene_name "1:133995848:134018370:-1"; gene_biotype "novel"; transcript_biotype "circRNA"; oId "lv:circ1:133995848:134018370:-1-559-006|ce:circ1:133995848:134018370:-1-1236-007|ts:circ1:133995848:134018370:-1-893-045"; tissue "lv|ce|ts";
1	ncSplice	exon	133995849	133996590	.	-	.	gene_id "1:133995848:134018370:-1"; transcript_id "rmCircRNA-45"; exon_number "1" gene_name "1:133995848:134018370:-1"; gene_biotype "novel"; oId "lv:circ1:133995848:134018370:-1-559-006|ce:circ1:133995848:134018370:-1-1236-007|ts:circ1:133995848:134018370:-1-893-045"; tissue "lv|ce|ts";
1	ncSplice	exon	134018269	134018370	.	-	.	gene_id "1:133995848:134018370:-1"; transcript_id "rmCircRNA-45"; exon_number "2" gene_name "1:133995848:134018370:-1"; gene_biotype "novel"; oId "lv:circ1:133995848:134018370:-1-559-006|ce:circ1:133995848:134018370:-1-1236-007|ts:circ1:133995848:134018370:-1-893-045"; tissue "lv|ce|ts";
1	ncSplice	gene	134242016	134245334	.	-	.	gene_id "ENSMMUG00000009987"; gene_name "GON4L"; gene_source "ncSplice"; gene_biotype "protein_coding";
1	ncSplice	transcript	134242016	134245334	.	-	.	gene_id "ENSMMUG00000009987"; transcript_id "rmCircRNA-46"; gene_name "GON4L"; gene_biotype "protein_coding"; transcript_biotype "circRNA"; oId "lv:circGON4L-567-002|ce:circGON4L-1247-001|ts:circGON4L-897-001"; tissue "lv|ce|ts";
1	ncSplice	exon	134242016	134242214	.	-	.	gene_id "ENSMMUG00000009987"; transcript_id "rmCircRNA-46"; exon_number "1" gene_name "GON4L"; gene_biotype "protein_coding"; oId "lv:circGON4L-567-002|ce:circGON4L-1247-001|ts:circGON4L-897-001"; tissue "lv|ce|ts";
1	ncSplice	exon	134245231	134245334	.	-	.	gene_id "ENSMMUG00000009987"; transcript_id "rmCircRNA-46"; exon_number "2" gene_name "GON4L"; gene_biotype "protein_coding"; oId "lv:circGON4L-567-002|ce:circGON4L-1247-001|ts:circGON4L-897-001"; tissue "lv|ce|ts";
11	ncSplice	gene	39133774	39134099	.	-	.	gene_id "ENSMMUG00000010868"; gene_name "YAF2"; gene_source "ncSplice"; gene_biotype "protein_coding";
11	ncSplice	transcript	39133774	39134099	.	-	.	gene_id "ENSMMUG00000010868"; transcript_id "rmCircRNA-47"; gene_name "YAF2"; gene_biotype "protein_coding"; transcript_biotype "circRNA"; oId "lv:circYAF2-589-001|ce:circYAF2-1325-001|ts:circYAF2-953-001"; tissue "lv|ce|ts";
11	ncSplice	exon	39133774	39133873	.	-	.	gene_id "ENSMMUG00000010868"; transcript_id "rmCircRNA-47"; exon_number "1" gene_name "YAF2"; gene_biotype "protein_coding"; oId "lv:circYAF2-589-001|ce:circYAF2-1325-001|ts:circYAF2-953-001"; tissue "lv|ce|ts";
11	ncSplice	exon	39133967	39134099	.	-	.	gene_id "ENSMMUG00000010868"; transcript_id "rmCircRNA-47"; exon_number "2" gene_name "YAF2"; gene_biotype "protein_coding"; oId "lv:circYAF2-589-001|ce:circYAF2-1325-001|ts:circYAF2-953-001"; tissue "lv|ce|ts";
11	ncSplice	gene	3939814	3971597	.	-	.	gene_id "ENSMMUG00000018273"; gene_name "PARP11"; gene_source "ncSplice"; gene_biotype "protein_coding";
11	ncSplice	transcript	3939814	3971597	.	-	.	gene_id "ENSMMUG00000018273"; transcript_id "rmCircRNA-48"; gene_name "PARP11"; gene_biotype "protein_coding"; transcript_biotype "circRNA"; oId "lv:circPARP11-595-002|ts:circPARP11-961-016"; tissue "lv|ts";
11	ncSplice	exon	3939814	3939944	.	-	.	gene_id "ENSMMUG00000018273"; transcript_id "rmCircRNA-48"; exon_number "1" gene_name "PARP11"; gene_biotype "protein_coding"; oId "lv:circPARP11-595-002|ts:circPARP11-961-016"; tissue "lv|ts";
11	ncSplice	exon	3940025	3940097	.	-	.	gene_id "ENSMMUG00000018273"; transcript_id "rmCircRNA-48"; exon_number "2" gene_name "PARP11"; gene_biotype "protein_coding"; oId "lv:circPARP11-595-002|ts:circPARP11-961-016"; tissue "lv|ts";
11	ncSplice	exon	3943746	3943821	.	-	.	gene_id "ENSMMUG00000018273"; transcript_id "rmCircRNA-48"; exon_number "3" gene_name "PARP11"; gene_biotype "protein_coding"; oId "lv:circPARP11-595-002|ts:circPARP11-961-016"; tissue "lv|ts";
11	ncSplice	exon	3946468	3946588	.	-	.	gene_id "ENSMMUG00000018273"; transcript_id "rmCircRNA-48"; exon_number "4" gene_name "PARP11"; gene_biotype "protein_coding"; oId "lv:circPARP11-595-002|ts:circPARP11-961-016"; tissue "lv|ts";
11	ncSplice	exon	3947465	3947593	.	-	.	gene_id "ENSMMUG00000018273"; transcript_id "rmCircRNA-48"; exon_number "5" gene_name "PARP11"; gene_biotype "protein_coding"; oId "lv:circPARP11-595-002|ts:circPARP11-961-016"; tissue "lv|ts";
11	ncSplice	exon	3971476	3971597	.	-	.	gene_id "ENSMMUG00000018273"; transcript_id "rmCircRNA-48"; exon_number "6" gene_name "PARP11"; gene_biotype "protein_coding"; oId "lv:circPARP11-595-002|ts:circPARP11-961-016"; tissue "lv|ts";
1	ncSplice	gene	139846253	139847016	.	-	.	gene_id "ENSMMUG00000018128"; gene_name "NR1I3"; gene_source "ncSplice"; gene_biotype "protein_coding";
1	ncSplice	transcript	139846253	139847016	.	-	.	gene_id "ENSMMUG00000018128"; transcript_id "rmCircRNA-49"; gene_name "NR1I3"; gene_biotype "protein_coding"; transcript_biotype "circRNA"; oId "lv:circNR1I3-597-001"; tissue "lv";
1	ncSplice	exon	139846253	139846383	.	-	.	gene_id "ENSMMUG00000018128"; transcript_id "rmCircRNA-49"; exon_number "1" gene_name "NR1I3"; gene_biotype "protein_coding"; oId "lv:circNR1I3-597-001"; tissue "lv";
1	ncSplice	exon	139846877	139847016	.	-	.	gene_id "ENSMMUG00000018128"; transcript_id "rmCircRNA-49"; exon_number "2" gene_name "NR1I3"; gene_biotype "protein_coding"; oId "lv:circNR1I3-597-001"; tissue "lv";
1	ncSplice	gene	142610507	142611048	.	-	.	gene_id "ENSMMUG00000001869"; gene_name "SNAP47"; gene_source "ncSplice"; gene_biotype "protein_coding";
1	ncSplice	transcript	142610507	142611048	.	-	.	gene_id "ENSMMUG00000001869"; transcript_id "rmCircRNA-50"; gene_name "SNAP47"; gene_biotype "protein_coding"; transcript_biotype "circRNA"; oId "lv:circSNAP47-609-001"; tissue "lv";
1	ncSplice	exon	142610507	142610806	.	-	.	gene_id "ENSMMUG00000001869"; transcript_id "rmCircRNA-50"; exon_number "1" gene_name "SNAP47"; gene_biotype "protein_coding"; oId "lv:circSNAP47-609-001"; tissue "lv";
1	ncSplice	exon	142610900	142611048	.	-	.	gene_id "ENSMMUG00000001869"; transcript_id "rmCircRNA-50"; exon_number "2" gene_name "SNAP47"; gene_biotype "protein_coding"; oId "lv:circSNAP47-609-001"; tissue "lv";
11	ncSplice	gene	47571779	47574981	.	+	.	gene_id "ENSMMUG00000008172"; gene_name "LARP4"; gene_source "ncSplice"; gene_biotype "protein_coding";
11	ncSplice	transcript	47571779	47574981	.	+	.	gene_id "ENSMMUG00000008172"; transcript_id "rmCircRNA-51"; gene_name "LARP4"; gene_biotype "protein_coding"; transcript_biotype "circRNA"; oId "lv:circLARP4-637-002|ce:circLARP4-1427-002"; tissue "lv|ce";
11	ncSplice	exon	47571779	47571926	.	+	.	gene_id "ENSMMUG00000008172"; transcript_id "rmCircRNA-51"; exon_number "1" gene_name "LARP4"; gene_biotype "protein_coding"; oId "lv:circLARP4-637-002|ce:circLARP4-1427-002"; tissue "lv|ce";
11	ncSplice	exon	47573082	47573237	.	+	.	gene_id "ENSMMUG00000008172"; transcript_id "rmCircRNA-51"; exon_number "2" gene_name "LARP4"; gene_biotype "protein_coding"; oId "lv:circLARP4-637-002|ce:circLARP4-1427-002"; tissue "lv|ce";
11	ncSplice	exon	47574906	47574981	.	+	.	gene_id "ENSMMUG00000008172"; transcript_id "rmCircRNA-51"; exon_number "3" gene_name "LARP4"; gene_biotype "protein_coding"; oId "lv:circLARP4-637-002|ce:circLARP4-1427-002"; tissue "lv|ce";
11	ncSplice	gene	47571779	47587934	.	+	.	gene_id "ENSMMUG00000008172"; gene_name "LARP4"; gene_source "ncSplice"; gene_biotype "protein_coding";
11	ncSplice	transcript	47571779	47587934	.	+	.	gene_id "ENSMMUG00000008172"; transcript_id "rmCircRNA-52"; gene_name "LARP4"; gene_biotype "protein_coding"; transcript_biotype "circRNA"; oId "lv:circLARP4-639-017"; tissue "lv";
11	ncSplice	exon	47571779	47571926	.	+	.	gene_id "ENSMMUG00000008172"; transcript_id "rmCircRNA-52"; exon_number "1" gene_name "LARP4"; gene_biotype "protein_coding"; oId "lv:circLARP4-639-017"; tissue "lv";
11	ncSplice	exon	47573082	47573237	.	+	.	gene_id "ENSMMUG00000008172"; transcript_id "rmCircRNA-52"; exon_number "2" gene_name "LARP4"; gene_biotype "protein_coding"; oId "lv:circLARP4-639-017"; tissue "lv";
11	ncSplice	exon	47574906	47574981	.	+	.	gene_id "ENSMMUG00000008172"; transcript_id "rmCircRNA-52"; exon_number "3" gene_name "LARP4"; gene_biotype "protein_coding"; oId "lv:circLARP4-639-017"; tissue "lv";
11	ncSplice	exon	47582687	47582790	.	+	.	gene_id "ENSMMUG00000008172"; transcript_id "rmCircRNA-52"; exon_number "4" gene_name "LARP4"; gene_biotype "protein_coding"; oId "lv:circLARP4-639-017"; tissue "lv";
11	ncSplice	exon	47586016	47586126	.	+	.	gene_id "ENSMMUG00000008172"; transcript_id "rmCircRNA-52"; exon_number "5" gene_name "LARP4"; gene_biotype "protein_coding"; oId "lv:circLARP4-639-017"; tissue "lv";
11	ncSplice	exon	47587881	47587934	.	+	.	gene_id "ENSMMUG00000008172"; transcript_id "rmCircRNA-52"; exon_number "6" gene_name "LARP4"; gene_biotype "protein_coding"; oId "lv:circLARP4-639-017"; tissue "lv";
11	ncSplice	gene	47571779	47608537	.	+	.	gene_id "ENSMMUG00000008172"; gene_name "LARP4"; gene_source "ncSplice"; gene_biotype "protein_coding";
11	ncSplice	transcript	47571779	47608537	.	+	.	gene_id "ENSMMUG00000008172"; transcript_id "rmCircRNA-53"; gene_name "LARP4"; gene_biotype "protein_coding"; transcript_biotype "circRNA"; oId "lv:circLARP4-641-116"; tissue "lv";
11	ncSplice	exon	47571779	47571926	.	+	.	gene_id "ENSMMUG00000008172"; transcript_id "rmCircRNA-53"; exon_number "1" gene_name "LARP4"; gene_biotype "protein_coding"; oId "lv:circLARP4-641-116"; tissue "lv";
11	ncSplice	exon	47573082	47573237	.	+	.	gene_id "ENSMMUG00000008172"; transcript_id "rmCircRNA-53"; exon_number "2" gene_name "LARP4"; gene_biotype "protein_coding"; oId "lv:circLARP4-641-116"; tissue "lv";
11	ncSplice	exon	47574906	47574981	.	+	.	gene_id "ENSMMUG00000008172"; transcript_id "rmCircRNA-53"; exon_number "3" gene_name "LARP4"; gene_biotype "protein_coding"; oId "lv:circLARP4-641-116"; tissue "lv";
11	ncSplice	exon	47582687	47582790	.	+	.	gene_id "ENSMMUG00000008172"; transcript_id "rmCircRNA-53"; exon_number "4" gene_name "LARP4"; gene_biotype "protein_coding"; oId "lv:circLARP4-641-116"; tissue "lv";
11	ncSplice	exon	47586016	47586126	.	+	.	gene_id "ENSMMUG00000008172"; transcript_id "rmCircRNA-53"; exon_number "5" gene_name "LARP4"; gene_biotype "protein_coding"; oId "lv:circLARP4-641-116"; tissue "lv";
11	ncSplice	exon	47587881	47587934	.	+	.	gene_id "ENSMMUG00000008172"; transcript_id "rmCircRNA-53"; exon_number "6" gene_name "LARP4"; gene_biotype "protein_coding"; oId "lv:circLARP4-641-116"; tissue "lv";
11	ncSplice	exon	47600146	47600358	.	+	.	gene_id "ENSMMUG00000008172"; transcript_id "rmCircRNA-53"; exon_number "7" gene_name "LARP4"; gene_biotype "protein_coding"; oId "lv:circLARP4-641-116"; tissue "lv";
11	ncSplice	exon	47600998	47601101	.	+	.	gene_id "ENSMMUG00000008172"; transcript_id "rmCircRNA-53"; exon_number "8" gene_name "LARP4"; gene_biotype "protein_coding"; oId "lv:circLARP4-641-116"; tissue "lv";
11	ncSplice	exon	47608325	47608537	.	+	.	gene_id "ENSMMUG00000008172"; transcript_id "rmCircRNA-53"; exon_number "9" gene_name "LARP4"; gene_biotype "protein_coding"; oId "lv:circLARP4-641-116"; tissue "lv";
11	ncSplice	gene	47582687	47608537	.	+	.	gene_id "ENSMMUG00000008172"; gene_name "LARP4"; gene_source "ncSplice"; gene_biotype "protein_coding";
11	ncSplice	transcript	47582687	47608537	.	+	.	gene_id "ENSMMUG00000008172"; transcript_id "rmCircRNA-54"; gene_name "LARP4"; gene_biotype "protein_coding"; transcript_biotype "circRNA"; oId "lv:circLARP4-647-006|ce:circLARP4-1436-004"; tissue "lv|ce";
11	ncSplice	exon	47582687	47582790	.	+	.	gene_id "ENSMMUG00000008172"; transcript_id "rmCircRNA-54"; exon_number "1" gene_name "LARP4"; gene_biotype "protein_coding"; oId "lv:circLARP4-647-006|ce:circLARP4-1436-004"; tissue "lv|ce";
11	ncSplice	exon	47586016	47586126	.	+	.	gene_id "ENSMMUG00000008172"; transcript_id "rmCircRNA-54"; exon_number "2" gene_name "LARP4"; gene_biotype "protein_coding"; oId "lv:circLARP4-647-006|ce:circLARP4-1436-004"; tissue "lv|ce";
11	ncSplice	exon	47587881	47587934	.	+	.	gene_id "ENSMMUG00000008172"; transcript_id "rmCircRNA-54"; exon_number "3" gene_name "LARP4"; gene_biotype "protein_coding"; oId "lv:circLARP4-647-006|ce:circLARP4-1436-004"; tissue "lv|ce";
11	ncSplice	exon	47600998	47601101	.	+	.	gene_id "ENSMMUG00000008172"; transcript_id "rmCircRNA-54"; exon_number "4" gene_name "LARP4"; gene_biotype "protein_coding"; oId "lv:circLARP4-647-006|ce:circLARP4-1436-004"; tissue "lv|ce";
11	ncSplice	exon	47608325	47608537	.	+	.	gene_id "ENSMMUG00000008172"; transcript_id "rmCircRNA-54"; exon_number "5" gene_name "LARP4"; gene_biotype "protein_coding"; oId "lv:circLARP4-647-006|ce:circLARP4-1436-004"; tissue "lv|ce";
11	ncSplice	gene	47600998	47608537	.	+	.	gene_id "ENSMMUG00000008172"; gene_name "LARP4"; gene_source "ncSplice"; gene_biotype "protein_coding";
11	ncSplice	transcript	47600998	47608537	.	+	.	gene_id "ENSMMUG00000008172"; transcript_id "rmCircRNA-55"; gene_name "LARP4"; gene_biotype "protein_coding"; transcript_biotype "circRNA"; oId "lv:circLARP4-649-002|ce:circLARP4-1437-002"; tissue "lv|ce";
11	ncSplice	exon	47600998	47601101	.	+	.	gene_id "ENSMMUG00000008172"; transcript_id "rmCircRNA-55"; exon_number "1" gene_name "LARP4"; gene_biotype "protein_coding"; oId "lv:circLARP4-649-002|ce:circLARP4-1437-002"; tissue "lv|ce";
11	ncSplice	exon	47608325	47608537	.	+	.	gene_id "ENSMMUG00000008172"; transcript_id "rmCircRNA-55"; exon_number "2" gene_name "LARP4"; gene_biotype "protein_coding"; oId "lv:circLARP4-649-002|ce:circLARP4-1437-002"; tissue "lv|ce";
11	ncSplice	gene	47935731	47966058	.	+	.	gene_id "ENSMMUG00000012095"; gene_name "ATF1"; gene_source "ncSplice"; gene_biotype "protein_coding";
11	ncSplice	transcript	47935731	47966058	.	+	.	gene_id "ENSMMUG00000012095"; transcript_id "rmCircRNA-56"; gene_name "ATF1"; gene_biotype "protein_coding"; transcript_biotype "circRNA"; oId "lv:circATF1-658-002|ce:circATF1-1464-003|ts:circATF1-1068-004"; tissue "lv|ce|ts";
11	ncSplice	exon	47935731	47935829	.	+	.	gene_id "ENSMMUG00000012095"; transcript_id "rmCircRNA-56"; exon_number "1" gene_name "ATF1"; gene_biotype "protein_coding"; oId "lv:circATF1-658-002|ce:circATF1-1464-003|ts:circATF1-1068-004"; tissue "lv|ce|ts";
11	ncSplice	exon	47952211	47952311	.	+	.	gene_id "ENSMMUG00000012095"; transcript_id "rmCircRNA-56"; exon_number "2" gene_name "ATF1"; gene_biotype "protein_coding"; oId "lv:circATF1-658-002|ce:circATF1-1464-003|ts:circATF1-1068-004"; tissue "lv|ce|ts";
11	ncSplice	exon	47965928	47966058	.	+	.	gene_id "ENSMMUG00000012095"; transcript_id "rmCircRNA-56"; exon_number "3" gene_name "ATF1"; gene_biotype "protein_coding"; oId "lv:circATF1-658-002|ce:circATF1-1464-003|ts:circATF1-1068-004"; tissue "lv|ce|ts";
11	ncSplice	gene	47935731	47970854	.	+	.	gene_id "ENSMMUG00000012095"; gene_name "ATF1"; gene_source "ncSplice"; gene_biotype "protein_coding";
11	ncSplice	transcript	47935731	47970854	.	+	.	gene_id "ENSMMUG00000012095"; transcript_id "rmCircRNA-57"; gene_name "ATF1"; gene_biotype "protein_coding"; transcript_biotype "circRNA"; oId "lv:circATF1-659-003|ce:circATF1-1465-014|ts:circATF1-1069-009"; tissue "lv|ce|ts";
11	ncSplice	exon	47935731	47935829	.	+	.	gene_id "ENSMMUG00000012095"; transcript_id "rmCircRNA-57"; exon_number "1" gene_name "ATF1"; gene_biotype "protein_coding"; oId "lv:circATF1-659-003|ce:circATF1-1465-014|ts:circATF1-1069-009"; tissue "lv|ce|ts";
11	ncSplice	exon	47952211	47952311	.	+	.	gene_id "ENSMMUG00000012095"; transcript_id "rmCircRNA-57"; exon_number "2" gene_name "ATF1"; gene_biotype "protein_coding"; oId "lv:circATF1-659-003|ce:circATF1-1465-014|ts:circATF1-1069-009"; tissue "lv|ce|ts";
11	ncSplice	exon	47965928	47966058	.	+	.	gene_id "ENSMMUG00000012095"; transcript_id "rmCircRNA-57"; exon_number "3" gene_name "ATF1"; gene_biotype "protein_coding"; oId "lv:circATF1-659-003|ce:circATF1-1465-014|ts:circATF1-1069-009"; tissue "lv|ce|ts";
11	ncSplice	exon	47970424	47970606	.	+	.	gene_id "ENSMMUG00000012095"; transcript_id "rmCircRNA-57"; exon_number "4" gene_name "ATF1"; gene_biotype "protein_coding"; oId "lv:circATF1-659-003|ce:circATF1-1465-014|ts:circATF1-1069-009"; tissue "lv|ce|ts";
11	ncSplice	exon	47970695	47970854	.	+	.	gene_id "ENSMMUG00000012095"; transcript_id "rmCircRNA-57"; exon_number "5" gene_name "ATF1"; gene_biotype "protein_coding"; oId "lv:circATF1-659-003|ce:circATF1-1465-014|ts:circATF1-1069-009"; tissue "lv|ce|ts";
11	ncSplice	gene	52848835	52863149	.	-	.	gene_id "ENSMMUG00000006289"; gene_name "NA"; gene_source "ncSplice"; gene_biotype "protein_coding";
11	ncSplice	transcript	52848835	52863149	.	-	.	gene_id "ENSMMUG00000006289"; transcript_id "rmCircRNA-58"; gene_name "NA"; gene_biotype "protein_coding"; transcript_biotype "circRNA"; oId "lv:circNA-673-007|ce:circNA-1509-007"; tissue "lv|ce";
11	ncSplice	exon	52848835	52848903	.	-	.	gene_id "ENSMMUG00000006289"; transcript_id "rmCircRNA-58"; exon_number "1" gene_name "NA"; gene_biotype "protein_coding"; oId "lv:circNA-673-007|ce:circNA-1509-007"; tissue "lv|ce";
11	ncSplice	exon	52850355	52850380	.	-	.	gene_id "ENSMMUG00000006289"; transcript_id "rmCircRNA-58"; exon_number "2" gene_name "NA"; gene_biotype "protein_coding"; oId "lv:circNA-673-007|ce:circNA-1509-007"; tissue "lv|ce";
11	ncSplice	exon	52854055	52854083	.	-	.	gene_id "ENSMMUG00000006289"; transcript_id "rmCircRNA-58"; exon_number "3" gene_name "NA"; gene_biotype "protein_coding"; oId "lv:circNA-673-007|ce:circNA-1509-007"; tissue "lv|ce";
11	ncSplice	exon	52854530	52854603	.	-	.	gene_id "ENSMMUG00000006289"; transcript_id "rmCircRNA-58"; exon_number "4" gene_name "NA"; gene_biotype "protein_coding"; oId "lv:circNA-673-007|ce:circNA-1509-007"; tissue "lv|ce";
11	ncSplice	exon	52855774	52855825	.	-	.	gene_id "ENSMMUG00000006289"; transcript_id "rmCircRNA-58"; exon_number "5" gene_name "NA"; gene_biotype "protein_coding"; oId "lv:circNA-673-007|ce:circNA-1509-007"; tissue "lv|ce";
11	ncSplice	exon	52859973	52860040	.	-	.	gene_id "ENSMMUG00000006289"; transcript_id "rmCircRNA-58"; exon_number "6" gene_name "NA"; gene_biotype "protein_coding"; oId "lv:circNA-673-007|ce:circNA-1509-007"; tissue "lv|ce";
11	ncSplice	exon	52860270	52860316	.	-	.	gene_id "ENSMMUG00000006289"; transcript_id "rmCircRNA-58"; exon_number "7" gene_name "NA"; gene_biotype "protein_coding"; oId "lv:circNA-673-007|ce:circNA-1509-007"; tissue "lv|ce";
11	ncSplice	exon	52863050	52863149	.	-	.	gene_id "ENSMMUG00000006289"; transcript_id "rmCircRNA-58"; exon_number "8" gene_name "NA"; gene_biotype "protein_coding"; oId "lv:circNA-673-007|ce:circNA-1509-007"; tissue "lv|ce";
11	ncSplice	gene	53145798	53147089	.	+	.	gene_id "ENSMMUG00000020758"; gene_name "ERBB3"; gene_source "ncSplice"; gene_biotype "protein_coding";
11	ncSplice	transcript	53145798	53147089	.	+	.	gene_id "ENSMMUG00000020758"; transcript_id "rmCircRNA-59"; gene_name "ERBB3"; gene_biotype "protein_coding"; transcript_biotype "circRNA"; oId "lv:circERBB3-675-001"; tissue "lv";
11	ncSplice	exon	53145798	53145863	.	+	.	gene_id "ENSMMUG00000020758"; transcript_id "rmCircRNA-59"; exon_number "1" gene_name "ERBB3"; gene_biotype "protein_coding"; oId "lv:circERBB3-675-001"; tissue "lv";
11	ncSplice	exon	53146016	53146134	.	+	.	gene_id "ENSMMUG00000020758"; transcript_id "rmCircRNA-59"; exon_number "2" gene_name "ERBB3"; gene_biotype "protein_coding"; oId "lv:circERBB3-675-001"; tissue "lv";
11	ncSplice	exon	53146242	53146383	.	+	.	gene_id "ENSMMUG00000020758"; transcript_id "rmCircRNA-59"; exon_number "3" gene_name "ERBB3"; gene_biotype "protein_coding"; oId "lv:circERBB3-675-001"; tissue "lv";
11	ncSplice	exon	53146764	53146877	.	+	.	gene_id "ENSMMUG00000020758"; transcript_id "rmCircRNA-59"; exon_number "4" gene_name "ERBB3"; gene_biotype "protein_coding"; oId "lv:circERBB3-675-001"; tissue "lv";
11	ncSplice	exon	53146969	53147089	.	+	.	gene_id "ENSMMUG00000020758"; transcript_id "rmCircRNA-59"; exon_number "5" gene_name "ERBB3"; gene_biotype "protein_coding"; oId "lv:circERBB3-675-001"; tissue "lv";
11	ncSplice	gene	53745827	53753595	.	-	.	gene_id "ENSMMUG00000013766"; gene_name "MMU.4022"; gene_source "ncSplice"; gene_biotype "protein_coding";
11	ncSplice	transcript	53745827	53753595	.	-	.	gene_id "ENSMMUG00000013766"; transcript_id "rmCircRNA-60"; gene_name "MMU.4022"; gene_biotype "protein_coding"; transcript_biotype "circRNA"; oId "lv:circMMU.4022-681-001"; tissue "lv";
11	ncSplice	exon	53745827	53745889	.	-	.	gene_id "ENSMMUG00000013766"; transcript_id "rmCircRNA-60"; exon_number "1" gene_name "MMU.4022"; gene_biotype "protein_coding"; oId "lv:circMMU.4022-681-001"; tissue "lv";
11	ncSplice	exon	53750177	53750266	.	-	.	gene_id "ENSMMUG00000013766"; transcript_id "rmCircRNA-60"; exon_number "2" gene_name "MMU.4022"; gene_biotype "protein_coding"; oId "lv:circMMU.4022-681-001"; tissue "lv";
11	ncSplice	exon	53751674	53751772	.	-	.	gene_id "ENSMMUG00000013766"; transcript_id "rmCircRNA-60"; exon_number "3" gene_name "MMU.4022"; gene_biotype "protein_coding"; oId "lv:circMMU.4022-681-001"; tissue "lv";
11	ncSplice	exon	53753275	53753344	.	-	.	gene_id "ENSMMUG00000013766"; transcript_id "rmCircRNA-60"; exon_number "4" gene_name "MMU.4022"; gene_biotype "protein_coding"; oId "lv:circMMU.4022-681-001"; tissue "lv";
11	ncSplice	exon	53753482	53753595	.	-	.	gene_id "ENSMMUG00000013766"; transcript_id "rmCircRNA-60"; exon_number "5" gene_name "MMU.4022"; gene_biotype "protein_coding"; oId "lv:circMMU.4022-681-001"; tissue "lv";
11	ncSplice	gene	53750177	53753595	.	-	.	gene_id "ENSMMUG00000013766"; gene_name "MMU.4022"; gene_source "ncSplice"; gene_biotype "protein_coding";
11	ncSplice	transcript	53750177	53753595	.	-	.	gene_id "ENSMMUG00000013766"; transcript_id "rmCircRNA-61"; gene_name "MMU.4022"; gene_biotype "protein_coding"; transcript_biotype "circRNA"; oId "lv:circMMU.4022-683-001"; tissue "lv";
11	ncSplice	exon	53750177	53750266	.	-	.	gene_id "ENSMMUG00000013766"; transcript_id "rmCircRNA-61"; exon_number "1" gene_name "MMU.4022"; gene_biotype "protein_coding"; oId "lv:circMMU.4022-683-001"; tissue "lv";
11	ncSplice	exon	53751674	53751772	.	-	.	gene_id "ENSMMUG00000013766"; transcript_id "rmCircRNA-61"; exon_number "2" gene_name "MMU.4022"; gene_biotype "protein_coding"; oId "lv:circMMU.4022-683-001"; tissue "lv";
11	ncSplice	exon	53753275	53753344	.	-	.	gene_id "ENSMMUG00000013766"; transcript_id "rmCircRNA-61"; exon_number "3" gene_name "MMU.4022"; gene_biotype "protein_coding"; oId "lv:circMMU.4022-683-001"; tissue "lv";
11	ncSplice	exon	53753482	53753595	.	-	.	gene_id "ENSMMUG00000013766"; transcript_id "rmCircRNA-61"; exon_number "4" gene_name "MMU.4022"; gene_biotype "protein_coding"; oId "lv:circMMU.4022-683-001"; tissue "lv";
11	ncSplice	gene	54132012	54136037	.	-	.	gene_id "ENSMMUG00000019783"; gene_name "TMEM194A"; gene_source "ncSplice"; gene_biotype "protein_coding";
11	ncSplice	transcript	54132012	54136037	.	-	.	gene_id "ENSMMUG00000019783"; transcript_id "rmCircRNA-62"; gene_name "TMEM194A"; gene_biotype "protein_coding"; transcript_biotype "circRNA"; oId "lv:circTMEM194A-685-001|ce:circTMEM194A-1523-002|ts:circTMEM194A-1112-002"; tissue "lv|ce|ts";
11	ncSplice	exon	54132012	54132084	.	-	.	gene_id "ENSMMUG00000019783"; transcript_id "rmCircRNA-62"; exon_number "1" gene_name "TMEM194A"; gene_biotype "protein_coding"; oId "lv:circTMEM194A-685-001|ce:circTMEM194A-1523-002|ts:circTMEM194A-1112-002"; tissue "lv|ce|ts";
11	ncSplice	exon	54133456	54133675	.	-	.	gene_id "ENSMMUG00000019783"; transcript_id "rmCircRNA-62"; exon_number "2" gene_name "TMEM194A"; gene_biotype "protein_coding"; oId "lv:circTMEM194A-685-001|ce:circTMEM194A-1523-002|ts:circTMEM194A-1112-002"; tissue "lv|ce|ts";
11	ncSplice	exon	54135913	54136037	.	-	.	gene_id "ENSMMUG00000019783"; transcript_id "rmCircRNA-62"; exon_number "3" gene_name "TMEM194A"; gene_biotype "protein_coding"; oId "lv:circTMEM194A-685-001|ce:circTMEM194A-1523-002|ts:circTMEM194A-1112-002"; tissue "lv|ce|ts";
11	ncSplice	gene	55045847	55050896	.	+	.	gene_id "ENSMMUG00000019218"; gene_name "XRCC6BP1"; gene_source "ncSplice"; gene_biotype "protein_coding";
11	ncSplice	transcript	55045847	55050896	.	+	.	gene_id "ENSMMUG00000019218"; transcript_id "rmCircRNA-63"; gene_name "XRCC6BP1"; gene_biotype "protein_coding"; transcript_biotype "circRNA"; oId "lv:circXRCC6BP1-695-001|ce:circXRCC6BP1-1542-001|ts:circXRCC6BP1-1126-001"; tissue "lv|ce|ts";
11	ncSplice	exon	55045847	55045928	.	+	.	gene_id "ENSMMUG00000019218"; transcript_id "rmCircRNA-63"; exon_number "1" gene_name "XRCC6BP1"; gene_biotype "protein_coding"; oId "lv:circXRCC6BP1-695-001|ce:circXRCC6BP1-1542-001|ts:circXRCC6BP1-1126-001"; tissue "lv|ce|ts";
11	ncSplice	exon	55049000	55049137	.	+	.	gene_id "ENSMMUG00000019218"; transcript_id "rmCircRNA-63"; exon_number "2" gene_name "XRCC6BP1"; gene_biotype "protein_coding"; oId "lv:circXRCC6BP1-695-001|ce:circXRCC6BP1-1542-001|ts:circXRCC6BP1-1126-001"; tissue "lv|ce|ts";
11	ncSplice	exon	55050813	55050896	.	+	.	gene_id "ENSMMUG00000019218"; transcript_id "rmCircRNA-63"; exon_number "3" gene_name "XRCC6BP1"; gene_biotype "protein_coding"; oId "lv:circXRCC6BP1-695-001|ce:circXRCC6BP1-1542-001|ts:circXRCC6BP1-1126-001"; tissue "lv|ce|ts";
1	ncSplice	gene	156442293	156457569	.	-	.	gene_id "ENSMMUG00000011914"; gene_name "PROX1"; gene_source "ncSplice"; gene_biotype "protein_coding";
1	ncSplice	transcript	156442293	156457569	.	-	.	gene_id "ENSMMUG00000011914"; transcript_id "rmCircRNA-64"; gene_name "PROX1"; gene_biotype "protein_coding"; transcript_biotype "circRNA"; oId "lv:circPROX1-698-001"; tissue "lv";
1	ncSplice	exon	156442293	156442487	.	-	.	gene_id "ENSMMUG00000011914"; transcript_id "rmCircRNA-64"; exon_number "1" gene_name "PROX1"; gene_biotype "protein_coding"; oId "lv:circPROX1-698-001"; tissue "lv";
1	ncSplice	exon	156448731	156448832	.	-	.	gene_id "ENSMMUG00000011914"; transcript_id "rmCircRNA-64"; exon_number "2" gene_name "PROX1"; gene_biotype "protein_coding"; oId "lv:circPROX1-698-001"; tissue "lv";
1	ncSplice	exon	156448913	156448923	.	-	.	gene_id "ENSMMUG00000011914"; transcript_id "rmCircRNA-64"; exon_number "3" gene_name "PROX1"; gene_biotype "protein_coding"; oId "lv:circPROX1-698-001"; tissue "lv";
1	ncSplice	exon	156455783	156457569	.	-	.	gene_id "ENSMMUG00000011914"; transcript_id "rmCircRNA-64"; exon_number "4" gene_name "PROX1"; gene_biotype "protein_coding"; oId "lv:circPROX1-698-001"; tissue "lv";
1	ncSplice	gene	15698081	15698773	.	-	.	gene_id "ENSMMUG00000005681"; gene_name "DHRS3"; gene_source "ncSplice"; gene_biotype "protein_coding";
1	ncSplice	transcript	15698081	15698773	.	-	.	gene_id "ENSMMUG00000005681"; transcript_id "rmCircRNA-65"; gene_name "DHRS3"; gene_biotype "protein_coding"; transcript_biotype "circRNA"; oId "lv:circDHRS3-706-001"; tissue "lv";
1	ncSplice	exon	15698081	15698319	.	-	.	gene_id "ENSMMUG00000005681"; transcript_id "rmCircRNA-65"; exon_number "1" gene_name "DHRS3"; gene_biotype "protein_coding"; oId "lv:circDHRS3-706-001"; tissue "lv";
1	ncSplice	exon	15698654	15698773	.	-	.	gene_id "ENSMMUG00000005681"; transcript_id "rmCircRNA-65"; exon_number "2" gene_name "DHRS3"; gene_biotype "protein_coding"; oId "lv:circDHRS3-706-001"; tissue "lv";
1	ncSplice	gene	163221250	163231944	.	-	.	gene_id "ENSMMUG00000013738"; gene_name "C4BPA"; gene_source "ncSplice"; gene_biotype "protein_coding";
1	ncSplice	transcript	163221250	163231944	.	-	.	gene_id "ENSMMUG00000013738"; transcript_id "rmCircRNA-66"; gene_name "C4BPA"; gene_biotype "protein_coding"; transcript_biotype "circRNA"; oId "lv:circC4BPA-724-002"; tissue "lv";
1	ncSplice	exon	163221250	163229141	.	-	.	gene_id "ENSMMUG00000013738"; transcript_id "rmCircRNA-66"; exon_number "1" gene_name "C4BPA"; gene_biotype "protein_coding"; oId "lv:circC4BPA-724-002"; tissue "lv";
1	ncSplice	exon	163230141	163230264	.	-	.	gene_id "ENSMMUG00000013738"; transcript_id "rmCircRNA-66"; exon_number "2" gene_name "C4BPA"; gene_biotype "protein_coding"; oId "lv:circC4BPA-724-002"; tissue "lv";
1	ncSplice	exon	163231501	163231601	.	-	.	gene_id "ENSMMUG00000013738"; transcript_id "rmCircRNA-66"; exon_number "3" gene_name "C4BPA"; gene_biotype "protein_coding"; oId "lv:circC4BPA-724-002"; tissue "lv";
1	ncSplice	exon	163231859	163231944	.	-	.	gene_id "ENSMMUG00000013738"; transcript_id "rmCircRNA-66"; exon_number "4" gene_name "C4BPA"; gene_biotype "protein_coding"; oId "lv:circC4BPA-724-002"; tissue "lv";
1	ncSplice	gene	164791172	164799006	.	+	.	gene_id "ENSMMUG00000001024"; gene_name "ELK4"; gene_source "ncSplice"; gene_biotype "protein_coding";
1	ncSplice	transcript	164791172	164799006	.	+	.	gene_id "ENSMMUG00000001024"; transcript_id "rmCircRNA-67"; gene_name "ELK4"; gene_biotype "protein_coding"; transcript_biotype "circRNA"; oId "lv:circELK4-731-001|ce:circELK4-1636-001|ts:circELK4-1205-001"; tissue "lv|ce|ts";
1	ncSplice	exon	164791172	164791387	.	+	.	gene_id "ENSMMUG00000001024"; transcript_id "rmCircRNA-67"; exon_number "1" gene_name "ELK4"; gene_biotype "protein_coding"; oId "lv:circELK4-731-001|ce:circELK4-1636-001|ts:circELK4-1205-001"; tissue "lv|ce|ts";
1	ncSplice	exon	164793796	164794668	.	+	.	gene_id "ENSMMUG00000001024"; transcript_id "rmCircRNA-67"; exon_number "2" gene_name "ELK4"; gene_biotype "protein_coding"; oId "lv:circELK4-731-001|ce:circELK4-1636-001|ts:circELK4-1205-001"; tissue "lv|ce|ts";
1	ncSplice	exon	164795872	164795988	.	+	.	gene_id "ENSMMUG00000001024"; transcript_id "rmCircRNA-67"; exon_number "3" gene_name "ELK4"; gene_biotype "protein_coding"; oId "lv:circELK4-731-001|ce:circELK4-1636-001|ts:circELK4-1205-001"; tissue "lv|ce|ts";
1	ncSplice	exon	164798837	164799006	.	+	.	gene_id "ENSMMUG00000001024"; transcript_id "rmCircRNA-67"; exon_number "4" gene_name "ELK4"; gene_biotype "protein_coding"; oId "lv:circELK4-731-001|ce:circELK4-1636-001|ts:circELK4-1205-001"; tissue "lv|ce|ts";
11	ncSplice	gene	65646841	65651050	.	+	.	gene_id "ENSMMUG00000011442"; gene_name "RAP1B"; gene_source "ncSplice"; gene_biotype "protein_coding";
11	ncSplice	transcript	65646841	65651050	.	+	.	gene_id "ENSMMUG00000011442"; transcript_id "rmCircRNA-68"; gene_name "RAP1B"; gene_biotype "protein_coding"; transcript_biotype "circRNA"; oId "lv:circRAP1B-733-001"; tissue "lv";
11	ncSplice	exon	65646841	65646981	.	+	.	gene_id "ENSMMUG00000011442"; transcript_id "rmCircRNA-68"; exon_number "1" gene_name "RAP1B"; gene_biotype "protein_coding"; oId "lv:circRAP1B-733-001"; tissue "lv";
11	ncSplice	exon	65650132	65650275	.	+	.	gene_id "ENSMMUG00000011442"; transcript_id "rmCircRNA-68"; exon_number "2" gene_name "RAP1B"; gene_biotype "protein_coding"; oId "lv:circRAP1B-733-001"; tissue "lv";
11	ncSplice	exon	65650934	65651050	.	+	.	gene_id "ENSMMUG00000011442"; transcript_id "rmCircRNA-68"; exon_number "3" gene_name "RAP1B"; gene_biotype "protein_coding"; oId "lv:circRAP1B-733-001"; tissue "lv";
11	ncSplice	gene	66229483	66241289	.	+	.	gene_id "ENSMMUG00000002921"; gene_name "CPSF6"; gene_source "ncSplice"; gene_biotype "protein_coding";
11	ncSplice	transcript	66229483	66241289	.	+	.	gene_id "ENSMMUG00000002921"; transcript_id "rmCircRNA-69"; gene_name "CPSF6"; gene_biotype "protein_coding"; transcript_biotype "circRNA"; oId "lv:circCPSF6-737-002|ce:circCPSF6-1650-010|ts:circCPSF6-1216-005"; tissue "lv|ce|ts";
11	ncSplice	exon	66229483	66229692	.	+	.	gene_id "ENSMMUG00000002921"; transcript_id "rmCircRNA-69"; exon_number "1" gene_name "CPSF6"; gene_biotype "protein_coding"; oId "lv:circCPSF6-737-002|ce:circCPSF6-1650-010|ts:circCPSF6-1216-005"; tissue "lv|ce|ts";
11	ncSplice	exon	66231377	66231480	.	+	.	gene_id "ENSMMUG00000002921"; transcript_id "rmCircRNA-69"; exon_number "2" gene_name "CPSF6"; gene_biotype "protein_coding"; oId "lv:circCPSF6-737-002|ce:circCPSF6-1650-010|ts:circCPSF6-1216-005"; tissue "lv|ce|ts";
11	ncSplice	exon	66235435	66235580	.	+	.	gene_id "ENSMMUG00000002921"; transcript_id "rmCircRNA-69"; exon_number "3" gene_name "CPSF6"; gene_biotype "protein_coding"; oId "lv:circCPSF6-737-002|ce:circCPSF6-1650-010|ts:circCPSF6-1216-005"; tissue "lv|ce|ts";
11	ncSplice	exon	66236472	66236645	.	+	.	gene_id "ENSMMUG00000002921"; transcript_id "rmCircRNA-69"; exon_number "4" gene_name "CPSF6"; gene_biotype "protein_coding"; oId "lv:circCPSF6-737-002|ce:circCPSF6-1650-010|ts:circCPSF6-1216-005"; tissue "lv|ce|ts";
11	ncSplice	exon	66237325	66237829	.	+	.	gene_id "ENSMMUG00000002921"; transcript_id "rmCircRNA-69"; exon_number "5" gene_name "CPSF6"; gene_biotype "protein_coding"; oId "lv:circCPSF6-737-002|ce:circCPSF6-1650-010|ts:circCPSF6-1216-005"; tissue "lv|ce|ts";
11	ncSplice	exon	66238162	66238277	.	+	.	gene_id "ENSMMUG00000002921"; transcript_id "rmCircRNA-69"; exon_number "6" gene_name "CPSF6"; gene_biotype "protein_coding"; oId "lv:circCPSF6-737-002|ce:circCPSF6-1650-010|ts:circCPSF6-1216-005"; tissue "lv|ce|ts";
11	ncSplice	exon	66238775	66238928	.	+	.	gene_id "ENSMMUG00000002921"; transcript_id "rmCircRNA-69"; exon_number "7" gene_name "CPSF6"; gene_biotype "protein_coding"; oId "lv:circCPSF6-737-002|ce:circCPSF6-1650-010|ts:circCPSF6-1216-005"; tissue "lv|ce|ts";
11	ncSplice	exon	66241100	66241289	.	+	.	gene_id "ENSMMUG00000002921"; transcript_id "rmCircRNA-69"; exon_number "8" gene_name "CPSF6"; gene_biotype "protein_coding"; oId "lv:circCPSF6-737-002|ce:circCPSF6-1650-010|ts:circCPSF6-1216-005"; tissue "lv|ce|ts";
1	ncSplice	gene	166317333	166319021	.	-	.	gene_id "ENSMMUG00000008460"; gene_name "SOX13"; gene_source "ncSplice"; gene_biotype "protein_coding";
1	ncSplice	transcript	166317333	166319021	.	-	.	gene_id "ENSMMUG00000008460"; transcript_id "rmCircRNA-70"; gene_name "SOX13"; gene_biotype "protein_coding"; transcript_biotype "circRNA"; oId "lv:circSOX13-738-001"; tissue "lv";
1	ncSplice	exon	166317333	166317419	.	-	.	gene_id "ENSMMUG00000008460"; transcript_id "rmCircRNA-70"; exon_number "1" gene_name "SOX13"; gene_biotype "protein_coding"; oId "lv:circSOX13-738-001"; tissue "lv";
1	ncSplice	exon	166317509	166317620	.	-	.	gene_id "ENSMMUG00000008460"; transcript_id "rmCircRNA-70"; exon_number "2" gene_name "SOX13"; gene_biotype "protein_coding"; oId "lv:circSOX13-738-001"; tissue "lv";
1	ncSplice	exon	166318823	166319021	.	-	.	gene_id "ENSMMUG00000008460"; transcript_id "rmCircRNA-70"; exon_number "3" gene_name "SOX13"; gene_biotype "protein_coding"; oId "lv:circSOX13-738-001"; tissue "lv";
11	ncSplice	gene	66747680	66748949	.	+	.	gene_id "ENSMMUG00000004783"; gene_name "RAB3IP"; gene_source "ncSplice"; gene_biotype "protein_coding";
11	ncSplice	transcript	66747680	66748949	.	+	.	gene_id "ENSMMUG00000004783"; transcript_id "rmCircRNA-71"; gene_name "RAB3IP"; gene_biotype "protein_coding"; transcript_biotype "circRNA"; oId "lv:circRAB3IP-740-001|ce:circRAB3IP-1661-001|ts:circRAB3IP-1223-001"; tissue "lv|ce|ts";
11	ncSplice	exon	66747680	66747774	.	+	.	gene_id "ENSMMUG00000004783"; transcript_id "rmCircRNA-71"; exon_number "1" gene_name "RAB3IP"; gene_biotype "protein_coding"; oId "lv:circRAB3IP-740-001|ce:circRAB3IP-1661-001|ts:circRAB3IP-1223-001"; tissue "lv|ce|ts";
11	ncSplice	exon	66747867	66747955	.	+	.	gene_id "ENSMMUG00000004783"; transcript_id "rmCircRNA-71"; exon_number "2" gene_name "RAB3IP"; gene_biotype "protein_coding"; oId "lv:circRAB3IP-740-001|ce:circRAB3IP-1661-001|ts:circRAB3IP-1223-001"; tissue "lv|ce|ts";
11	ncSplice	exon	66748691	66748949	.	+	.	gene_id "ENSMMUG00000004783"; transcript_id "rmCircRNA-71"; exon_number "3" gene_name "RAB3IP"; gene_biotype "protein_coding"; oId "lv:circRAB3IP-740-001|ce:circRAB3IP-1661-001|ts:circRAB3IP-1223-001"; tissue "lv|ce|ts";
1	ncSplice	gene	173789555	173807452	.	-	.	gene_id "1:173789554:173807452:-1"; gene_name "1:173789554:173807452:-1"; gene_source "ncSplice"; gene_biotype "novel";
1	ncSplice	transcript	173789555	173807452	.	-	.	gene_id "1:173789554:173807452:-1"; transcript_id "rmCircRNA-72"; gene_name "1:173789554:173807452:-1"; gene_biotype "novel"; transcript_biotype "circRNA"; oId "lv:circ1:173789554:173807452:-1-753-004"; tissue "lv";
1	ncSplice	exon	173789555	173789731	.	-	.	gene_id "1:173789554:173807452:-1"; transcript_id "rmCircRNA-72"; exon_number "1" gene_name "1:173789554:173807452:-1"; gene_biotype "novel"; oId "lv:circ1:173789554:173807452:-1-753-004"; tissue "lv";
1	ncSplice	exon	173791132	173791311	.	-	.	gene_id "1:173789554:173807452:-1"; transcript_id "rmCircRNA-72"; exon_number "2" gene_name "1:173789554:173807452:-1"; gene_biotype "novel"; oId "lv:circ1:173789554:173807452:-1-753-004"; tissue "lv";
1	ncSplice	exon	173791420	173791602	.	-	.	gene_id "1:173789554:173807452:-1"; transcript_id "rmCircRNA-72"; exon_number "3" gene_name "1:173789554:173807452:-1"; gene_biotype "novel"; oId "lv:circ1:173789554:173807452:-1-753-004"; tissue "lv";
1	ncSplice	exon	173792770	173792946	.	-	.	gene_id "1:173789554:173807452:-1"; transcript_id "rmCircRNA-72"; exon_number "4" gene_name "1:173789554:173807452:-1"; gene_biotype "novel"; oId "lv:circ1:173789554:173807452:-1-753-004"; tissue "lv";
1	ncSplice	exon	173800190	173805352	.	-	.	gene_id "1:173789554:173807452:-1"; transcript_id "rmCircRNA-72"; exon_number "5" gene_name "1:173789554:173807452:-1"; gene_biotype "novel"; oId "lv:circ1:173789554:173807452:-1-753-004"; tissue "lv";
1	ncSplice	exon	173807270	173807452	.	-	.	gene_id "1:173789554:173807452:-1"; transcript_id "rmCircRNA-72"; exon_number "6" gene_name "1:173789554:173807452:-1"; gene_biotype "novel"; oId "lv:circ1:173789554:173807452:-1-753-004"; tissue "lv";
1	ncSplice	gene	174037336	174066666	.	+	.	gene_id "ENSMMUG00000021082"; gene_name "KCNT2"; gene_source "ncSplice"; gene_biotype "protein_coding";
1	ncSplice	transcript	174037336	174066666	.	+	.	gene_id "ENSMMUG00000021082"; transcript_id "rmCircRNA-73"; gene_name "KCNT2"; gene_biotype "protein_coding"; transcript_biotype "circRNA"; oId "lv:circKCNT2-757-009"; tissue "lv";
1	ncSplice	exon	174037336	174037415	.	+	.	gene_id "ENSMMUG00000021082"; transcript_id "rmCircRNA-73"; exon_number "1" gene_name "KCNT2"; gene_biotype "protein_coding"; oId "lv:circKCNT2-757-009"; tissue "lv";
1	ncSplice	exon	174039695	174039794	.	+	.	gene_id "ENSMMUG00000021082"; transcript_id "rmCircRNA-73"; exon_number "2" gene_name "KCNT2"; gene_biotype "protein_coding"; oId "lv:circKCNT2-757-009"; tissue "lv";
1	ncSplice	exon	174048923	174048971	.	+	.	gene_id "ENSMMUG00000021082"; transcript_id "rmCircRNA-73"; exon_number "3" gene_name "KCNT2"; gene_biotype "protein_coding"; oId "lv:circKCNT2-757-009"; tissue "lv";
1	ncSplice	exon	174052361	174052420	.	+	.	gene_id "ENSMMUG00000021082"; transcript_id "rmCircRNA-73"; exon_number "4" gene_name "KCNT2"; gene_biotype "protein_coding"; oId "lv:circKCNT2-757-009"; tissue "lv";
1	ncSplice	exon	174062197	174062271	.	+	.	gene_id "ENSMMUG00000021082"; transcript_id "rmCircRNA-73"; exon_number "5" gene_name "KCNT2"; gene_biotype "protein_coding"; oId "lv:circKCNT2-757-009"; tissue "lv";
1	ncSplice	exon	174063478	174063561	.	+	.	gene_id "ENSMMUG00000021082"; transcript_id "rmCircRNA-73"; exon_number "6" gene_name "KCNT2"; gene_biotype "protein_coding"; oId "lv:circKCNT2-757-009"; tissue "lv";
1	ncSplice	exon	174066572	174066666	.	+	.	gene_id "ENSMMUG00000021082"; transcript_id "rmCircRNA-73"; exon_number "7" gene_name "KCNT2"; gene_biotype "protein_coding"; oId "lv:circKCNT2-757-009"; tissue "lv";
1	ncSplice	gene	18408862	18426664	.	+	.	gene_id "ENSMMUG00000019912"; gene_name "DDI2"; gene_source "ncSplice"; gene_biotype "protein_coding";
1	ncSplice	transcript	18408862	18426664	.	+	.	gene_id "ENSMMUG00000019912"; transcript_id "rmCircRNA-74"; gene_name "DDI2"; gene_biotype "protein_coding"; transcript_biotype "circRNA"; oId "lv:circDDI2-777-015"; tissue "lv";
1	ncSplice	exon	18408862	18408991	.	+	.	gene_id "ENSMMUG00000019912"; transcript_id "rmCircRNA-74"; exon_number "1" gene_name "DDI2"; gene_biotype "protein_coding"; oId "lv:circDDI2-777-015"; tissue "lv";
1	ncSplice	exon	18413261	18413375	.	+	.	gene_id "ENSMMUG00000019912"; transcript_id "rmCircRNA-74"; exon_number "2" gene_name "DDI2"; gene_biotype "protein_coding"; oId "lv:circDDI2-777-015"; tissue "lv";
1	ncSplice	exon	18416231	18416357	.	+	.	gene_id "ENSMMUG00000019912"; transcript_id "rmCircRNA-74"; exon_number "3" gene_name "DDI2"; gene_biotype "protein_coding"; oId "lv:circDDI2-777-015"; tissue "lv";
1	ncSplice	exon	18421372	18421499	.	+	.	gene_id "ENSMMUG00000019912"; transcript_id "rmCircRNA-74"; exon_number "4" gene_name "DDI2"; gene_biotype "protein_coding"; oId "lv:circDDI2-777-015"; tissue "lv";
1	ncSplice	exon	18426536	18426664	.	+	.	gene_id "ENSMMUG00000019912"; transcript_id "rmCircRNA-74"; exon_number "5" gene_name "DDI2"; gene_biotype "protein_coding"; oId "lv:circDDI2-777-015"; tissue "lv";
1	ncSplice	gene	18416231	18426664	.	+	.	gene_id "ENSMMUG00000019912"; gene_name "DDI2"; gene_source "ncSplice"; gene_biotype "protein_coding";
1	ncSplice	transcript	18416231	18426664	.	+	.	gene_id "ENSMMUG00000019912"; transcript_id "rmCircRNA-75"; gene_name "DDI2"; gene_biotype "protein_coding"; transcript_biotype "circRNA"; oId "lv:circDDI2-781-003|ce:circDDI2-1770-001"; tissue "lv|ce";
1	ncSplice	exon	18416231	18416357	.	+	.	gene_id "ENSMMUG00000019912"; transcript_id "rmCircRNA-75"; exon_number "1" gene_name "DDI2"; gene_biotype "protein_coding"; oId "lv:circDDI2-781-003|ce:circDDI2-1770-001"; tissue "lv|ce";
1	ncSplice	exon	18421372	18421499	.	+	.	gene_id "ENSMMUG00000019912"; transcript_id "rmCircRNA-75"; exon_number "2" gene_name "DDI2"; gene_biotype "protein_coding"; oId "lv:circDDI2-781-003|ce:circDDI2-1770-001"; tissue "lv|ce";
1	ncSplice	exon	18426536	18426664	.	+	.	gene_id "ENSMMUG00000019912"; transcript_id "rmCircRNA-75"; exon_number "3" gene_name "DDI2"; gene_biotype "protein_coding"; oId "lv:circDDI2-781-003|ce:circDDI2-1770-001"; tissue "lv|ce";
1	ncSplice	gene	185462298	185492611	.	-	.	gene_id "ENSMMUG00000013882"; gene_name "SWT1"; gene_source "ncSplice"; gene_biotype "protein_coding";
1	ncSplice	transcript	185462298	185492611	.	-	.	gene_id "ENSMMUG00000013882"; transcript_id "rmCircRNA-76"; gene_name "SWT1"; gene_biotype "protein_coding"; transcript_biotype "circRNA"; oId "lv:circSWT1-796-005"; tissue "lv";
1	ncSplice	exon	185462298	185462429	.	-	.	gene_id "ENSMMUG00000013882"; transcript_id "rmCircRNA-76"; exon_number "1" gene_name "SWT1"; gene_biotype "protein_coding"; oId "lv:circSWT1-796-005"; tissue "lv";
1	ncSplice	exon	185473362	185473549	.	-	.	gene_id "ENSMMUG00000013882"; transcript_id "rmCircRNA-76"; exon_number "2" gene_name "SWT1"; gene_biotype "protein_coding"; oId "lv:circSWT1-796-005"; tissue "lv";
1	ncSplice	exon	185481039	185481187	.	-	.	gene_id "ENSMMUG00000013882"; transcript_id "rmCircRNA-76"; exon_number "3" gene_name "SWT1"; gene_biotype "protein_coding"; oId "lv:circSWT1-796-005"; tissue "lv";
1	ncSplice	exon	185488478	185488616	.	-	.	gene_id "ENSMMUG00000013882"; transcript_id "rmCircRNA-76"; exon_number "4" gene_name "SWT1"; gene_biotype "protein_coding"; oId "lv:circSWT1-796-005"; tissue "lv";
1	ncSplice	exon	185490398	185490561	.	-	.	gene_id "ENSMMUG00000013882"; transcript_id "rmCircRNA-76"; exon_number "5" gene_name "SWT1"; gene_biotype "protein_coding"; oId "lv:circSWT1-796-005"; tissue "lv";
1	ncSplice	exon	185492466	185492611	.	-	.	gene_id "ENSMMUG00000013882"; transcript_id "rmCircRNA-76"; exon_number "6" gene_name "SWT1"; gene_biotype "protein_coding"; oId "lv:circSWT1-796-005"; tissue "lv";
1	ncSplice	gene	185473362	185492611	.	-	.	gene_id "ENSMMUG00000013882"; gene_name "SWT1"; gene_source "ncSplice"; gene_biotype "protein_coding";
1	ncSplice	transcript	185473362	185492611	.	-	.	gene_id "ENSMMUG00000013882"; transcript_id "rmCircRNA-77"; gene_name "SWT1"; gene_biotype "protein_coding"; transcript_biotype "circRNA"; oId "lv:circSWT1-798-005"; tissue "lv";
1	ncSplice	exon	185473362	185473549	.	-	.	gene_id "ENSMMUG00000013882"; transcript_id "rmCircRNA-77"; exon_number "1" gene_name "SWT1"; gene_biotype "protein_coding"; oId "lv:circSWT1-798-005"; tissue "lv";
1	ncSplice	exon	185481039	185481187	.	-	.	gene_id "ENSMMUG00000013882"; transcript_id "rmCircRNA-77"; exon_number "2" gene_name "SWT1"; gene_biotype "protein_coding"; oId "lv:circSWT1-798-005"; tissue "lv";
1	ncSplice	exon	185488478	185488616	.	-	.	gene_id "ENSMMUG00000013882"; transcript_id "rmCircRNA-77"; exon_number "3" gene_name "SWT1"; gene_biotype "protein_coding"; oId "lv:circSWT1-798-005"; tissue "lv";
1	ncSplice	exon	185490398	185490561	.	-	.	gene_id "ENSMMUG00000013882"; transcript_id "rmCircRNA-77"; exon_number "4" gene_name "SWT1"; gene_biotype "protein_coding"; oId "lv:circSWT1-798-005"; tissue "lv";
1	ncSplice	exon	185492466	185492611	.	-	.	gene_id "ENSMMUG00000013882"; transcript_id "rmCircRNA-77"; exon_number "5" gene_name "SWT1"; gene_biotype "protein_coding"; oId "lv:circSWT1-798-005"; tissue "lv";
1	ncSplice	gene	191887571	191939822	.	-	.	gene_id "ENSMMUG00000017551"; gene_name "RALGPS2"; gene_source "ncSplice"; gene_biotype "protein_coding";
1	ncSplice	transcript	191887571	191939822	.	-	.	gene_id "ENSMMUG00000017551"; transcript_id "rmCircRNA-78"; gene_name "RALGPS2"; gene_biotype "protein_coding"; transcript_biotype "circRNA"; oId "lv:circRALGPS2-834-004"; tissue "lv";
1	ncSplice	exon	191887571	191887697	.	-	.	gene_id "ENSMMUG00000017551"; transcript_id "rmCircRNA-78"; exon_number "1" gene_name "RALGPS2"; gene_biotype "protein_coding"; oId "lv:circRALGPS2-834-004"; tissue "lv";
1	ncSplice	exon	191899423	191900684	.	-	.	gene_id "ENSMMUG00000017551"; transcript_id "rmCircRNA-78"; exon_number "2" gene_name "RALGPS2"; gene_biotype "protein_coding"; oId "lv:circRALGPS2-834-004"; tissue "lv";
1	ncSplice	exon	191911948	191912031	.	-	.	gene_id "ENSMMUG00000017551"; transcript_id "rmCircRNA-78"; exon_number "3" gene_name "RALGPS2"; gene_biotype "protein_coding"; oId "lv:circRALGPS2-834-004"; tissue "lv";
1	ncSplice	exon	191932913	191932963	.	-	.	gene_id "ENSMMUG00000017551"; transcript_id "rmCircRNA-78"; exon_number "4" gene_name "RALGPS2"; gene_biotype "protein_coding"; oId "lv:circRALGPS2-834-004"; tissue "lv";
1	ncSplice	exon	191933994	191934098	.	-	.	gene_id "ENSMMUG00000017551"; transcript_id "rmCircRNA-78"; exon_number "5" gene_name "RALGPS2"; gene_biotype "protein_coding"; oId "lv:circRALGPS2-834-004"; tissue "lv";
1	ncSplice	exon	191939683	191939822	.	-	.	gene_id "ENSMMUG00000017551"; transcript_id "rmCircRNA-78"; exon_number "6" gene_name "RALGPS2"; gene_biotype "protein_coding"; oId "lv:circRALGPS2-834-004"; tissue "lv";
11	ncSplice	gene	94019338	94051067	.	-	.	gene_id "ENSMMUG00000002244"; gene_name "EEA1"; gene_source "ncSplice"; gene_biotype "protein_coding";
11	ncSplice	transcript	94019338	94051067	.	-	.	gene_id "ENSMMUG00000002244"; transcript_id "rmCircRNA-79"; gene_name "EEA1"; gene_biotype "protein_coding"; transcript_biotype "circRNA"; oId "lv:circEEA1-840-001"; tissue "lv";
11	ncSplice	exon	94019338	94022507	.	-	.	gene_id "ENSMMUG00000002244"; transcript_id "rmCircRNA-79"; exon_number "1" gene_name "EEA1"; gene_biotype "protein_coding"; oId "lv:circEEA1-840-001"; tissue "lv";
11	ncSplice	exon	94024324	94031078	.	-	.	gene_id "ENSMMUG00000002244"; transcript_id "rmCircRNA-79"; exon_number "2" gene_name "EEA1"; gene_biotype "protein_coding"; oId "lv:circEEA1-840-001"; tissue "lv";
11	ncSplice	exon	94035141	94035479	.	-	.	gene_id "ENSMMUG00000002244"; transcript_id "rmCircRNA-79"; exon_number "3" gene_name "EEA1"; gene_biotype "protein_coding"; oId "lv:circEEA1-840-001"; tissue "lv";
11	ncSplice	exon	94050951	94051067	.	-	.	gene_id "ENSMMUG00000002244"; transcript_id "rmCircRNA-79"; exon_number "4" gene_name "EEA1"; gene_biotype "protein_coding"; oId "lv:circEEA1-840-001"; tissue "lv";
11	ncSplice	gene	94030929	94062124	.	-	.	gene_id "ENSMMUG00000002244"; gene_name "EEA1"; gene_source "ncSplice"; gene_biotype "protein_coding";
11	ncSplice	transcript	94030929	94062124	.	-	.	gene_id "ENSMMUG00000002244"; transcript_id "rmCircRNA-80"; gene_name "EEA1"; gene_biotype "protein_coding"; transcript_biotype "circRNA"; oId "lv:circEEA1-841-001"; tissue "lv";
11	ncSplice	exon	94030929	94031078	.	-	.	gene_id "ENSMMUG00000002244"; transcript_id "rmCircRNA-80"; exon_number "1" gene_name "EEA1"; gene_biotype "protein_coding"; oId "lv:circEEA1-841-001"; tissue "lv";
11	ncSplice	exon	94035141	94035479	.	-	.	gene_id "ENSMMUG00000002244"; transcript_id "rmCircRNA-80"; exon_number "2" gene_name "EEA1"; gene_biotype "protein_coding"; oId "lv:circEEA1-841-001"; tissue "lv";
11	ncSplice	exon	94050951	94051067	.	-	.	gene_id "ENSMMUG00000002244"; transcript_id "rmCircRNA-80"; exon_number "3" gene_name "EEA1"; gene_biotype "protein_coding"; oId "lv:circEEA1-841-001"; tissue "lv";
11	ncSplice	exon	94060219	94060374	.	-	.	gene_id "ENSMMUG00000002244"; transcript_id "rmCircRNA-80"; exon_number "4" gene_name "EEA1"; gene_biotype "protein_coding"; oId "lv:circEEA1-841-001"; tissue "lv";
11	ncSplice	exon	94061265	94061386	.	-	.	gene_id "ENSMMUG00000002244"; transcript_id "rmCircRNA-80"; exon_number "5" gene_name "EEA1"; gene_biotype "protein_coding"; oId "lv:circEEA1-841-001"; tissue "lv";
11	ncSplice	exon	94062011	94062124	.	-	.	gene_id "ENSMMUG00000002244"; transcript_id "rmCircRNA-80"; exon_number "6" gene_name "EEA1"; gene_biotype "protein_coding"; oId "lv:circEEA1-841-001"; tissue "lv";
11	ncSplice	gene	94060219	94062124	.	-	.	gene_id "ENSMMUG00000002244"; gene_name "EEA1"; gene_source "ncSplice"; gene_biotype "protein_coding";
11	ncSplice	transcript	94060219	94062124	.	-	.	gene_id "ENSMMUG00000002244"; transcript_id "rmCircRNA-81"; gene_name "EEA1"; gene_biotype "protein_coding"; transcript_biotype "circRNA"; oId "lv:circEEA1-845-001|ts:circEEA1-1447-001"; tissue "lv|ts";
11	ncSplice	exon	94060219	94060374	.	-	.	gene_id "ENSMMUG00000002244"; transcript_id "rmCircRNA-81"; exon_number "1" gene_name "EEA1"; gene_biotype "protein_coding"; oId "lv:circEEA1-845-001|ts:circEEA1-1447-001"; tissue "lv|ts";
11	ncSplice	exon	94061265	94061386	.	-	.	gene_id "ENSMMUG00000002244"; transcript_id "rmCircRNA-81"; exon_number "2" gene_name "EEA1"; gene_biotype "protein_coding"; oId "lv:circEEA1-845-001|ts:circEEA1-1447-001"; tissue "lv|ts";
11	ncSplice	exon	94062011	94062124	.	-	.	gene_id "ENSMMUG00000002244"; transcript_id "rmCircRNA-81"; exon_number "3" gene_name "EEA1"; gene_biotype "protein_coding"; oId "lv:circEEA1-845-001|ts:circEEA1-1447-001"; tissue "lv|ts";
1	ncSplice	gene	197678774	197704439	.	+	.	gene_id "ENSMMUG00000010389"; gene_name "DCAF6"; gene_source "ncSplice"; gene_biotype "protein_coding";
1	ncSplice	transcript	197678774	197704439	.	+	.	gene_id "ENSMMUG00000010389"; transcript_id "rmCircRNA-82"; gene_name "DCAF6"; gene_biotype "protein_coding"; transcript_biotype "circRNA"; oId "lv:circDCAF6-851-002|ts:circDCAF6-1470-002"; tissue "lv|ts";
1	ncSplice	exon	197678774	197678835	.	+	.	gene_id "ENSMMUG00000010389"; transcript_id "rmCircRNA-82"; exon_number "1" gene_name "DCAF6"; gene_biotype "protein_coding"; oId "lv:circDCAF6-851-002|ts:circDCAF6-1470-002"; tissue "lv|ts";
1	ncSplice	exon	197693339	197693431	.	+	.	gene_id "ENSMMUG00000010389"; transcript_id "rmCircRNA-82"; exon_number "2" gene_name "DCAF6"; gene_biotype "protein_coding"; oId "lv:circDCAF6-851-002|ts:circDCAF6-1470-002"; tissue "lv|ts";
1	ncSplice	exon	197704254	197704439	.	+	.	gene_id "ENSMMUG00000010389"; transcript_id "rmCircRNA-82"; exon_number "3" gene_name "DCAF6"; gene_biotype "protein_coding"; oId "lv:circDCAF6-851-002|ts:circDCAF6-1470-002"; tissue "lv|ts";
1	ncSplice	gene	197769526	197776168	.	+	.	gene_id "ENSMMUG00000010389"; gene_name "DCAF6"; gene_source "ncSplice"; gene_biotype "protein_coding";
1	ncSplice	transcript	197769526	197776168	.	+	.	gene_id "ENSMMUG00000010389"; transcript_id "rmCircRNA-83"; gene_name "DCAF6"; gene_biotype "protein_coding"; transcript_biotype "circRNA"; oId "lv:circDCAF6-854-001"; tissue "lv";
1	ncSplice	exon	197769526	197769643	.	+	.	gene_id "ENSMMUG00000010389"; transcript_id "rmCircRNA-83"; exon_number "1" gene_name "DCAF6"; gene_biotype "protein_coding"; oId "lv:circDCAF6-854-001"; tissue "lv";
1	ncSplice	exon	197773981	197774096	.	+	.	gene_id "ENSMMUG00000010389"; transcript_id "rmCircRNA-83"; exon_number "2" gene_name "DCAF6"; gene_biotype "protein_coding"; oId "lv:circDCAF6-854-001"; tissue "lv";
1	ncSplice	exon	197775526	197775612	.	+	.	gene_id "ENSMMUG00000010389"; transcript_id "rmCircRNA-83"; exon_number "3" gene_name "DCAF6"; gene_biotype "protein_coding"; oId "lv:circDCAF6-854-001"; tissue "lv";
1	ncSplice	exon	197775841	197776168	.	+	.	gene_id "ENSMMUG00000010389"; transcript_id "rmCircRNA-83"; exon_number "4" gene_name "DCAF6"; gene_biotype "protein_coding"; oId "lv:circDCAF6-854-001"; tissue "lv";
1	ncSplice	gene	205653001	205656184	.	-	.	gene_id "ENSMMUG00000002072"; gene_name "RFWD2"; gene_source "ncSplice"; gene_biotype "protein_coding";
1	ncSplice	transcript	205653001	205656184	.	-	.	gene_id "ENSMMUG00000002072"; transcript_id "rmCircRNA-84"; gene_name "RFWD2"; gene_biotype "protein_coding"; transcript_biotype "circRNA"; oId "lv:circRFWD2-882-001|ce:circRFWD2-1986-001"; tissue "lv|ce";
1	ncSplice	exon	205653001	205653082	.	-	.	gene_id "ENSMMUG00000002072"; transcript_id "rmCircRNA-84"; exon_number "1" gene_name "RFWD2"; gene_biotype "protein_coding"; oId "lv:circRFWD2-882-001|ce:circRFWD2-1986-001"; tissue "lv|ce";
1	ncSplice	exon	205653529	205653637	.	-	.	gene_id "ENSMMUG00000002072"; transcript_id "rmCircRNA-84"; exon_number "2" gene_name "RFWD2"; gene_biotype "protein_coding"; oId "lv:circRFWD2-882-001|ce:circRFWD2-1986-001"; tissue "lv|ce";
1	ncSplice	exon	205656041	205656184	.	-	.	gene_id "ENSMMUG00000002072"; transcript_id "rmCircRNA-84"; exon_number "3" gene_name "RFWD2"; gene_biotype "protein_coding"; oId "lv:circRFWD2-882-001|ce:circRFWD2-1986-001"; tissue "lv|ce";
1	ncSplice	gene	209821357	209826199	.	+	.	gene_id "ENSMMUG00000004566"; gene_name "ZNF124"; gene_source "ncSplice"; gene_biotype "protein_coding";
1	ncSplice	transcript	209821357	209826199	.	+	.	gene_id "ENSMMUG00000004566"; transcript_id "rmCircRNA-85"; gene_name "ZNF124"; gene_biotype "protein_coding"; transcript_biotype "circRNA"; oId "lv:circZNF124-891-001"; tissue "lv";
1	ncSplice	exon	209821357	209821483	.	+	.	gene_id "ENSMMUG00000004566"; transcript_id "rmCircRNA-85"; exon_number "1" gene_name "ZNF124"; gene_biotype "protein_coding"; oId "lv:circZNF124-891-001"; tissue "lv";
1	ncSplice	exon	209822103	209826199	.	+	.	gene_id "ENSMMUG00000004566"; transcript_id "rmCircRNA-85"; exon_number "2" gene_name "ZNF124"; gene_biotype "protein_coding"; oId "lv:circZNF124-891-001"; tissue "lv";
1	ncSplice	gene	210106831	210125071	.	+	.	gene_id "ENSMMUG00000016408"; gene_name "AHCTF1"; gene_source "ncSplice"; gene_biotype "protein_coding";
1	ncSplice	transcript	210106831	210125071	.	+	.	gene_id "ENSMMUG00000016408"; transcript_id "rmCircRNA-86"; gene_name "AHCTF1"; gene_biotype "protein_coding"; transcript_biotype "circRNA"; oId "lv:circAHCTF1-895-001|ce:circAHCTF1-2012-001|ts:circAHCTF1-1578-001"; tissue "lv|ce|ts";
1	ncSplice	exon	210106831	210107018	.	+	.	gene_id "ENSMMUG00000016408"; transcript_id "rmCircRNA-86"; exon_number "1" gene_name "AHCTF1"; gene_biotype "protein_coding"; oId "lv:circAHCTF1-895-001|ce:circAHCTF1-2012-001|ts:circAHCTF1-1578-001"; tissue "lv|ce|ts";
1	ncSplice	exon	210115491	210115635	.	+	.	gene_id "ENSMMUG00000016408"; transcript_id "rmCircRNA-86"; exon_number "2" gene_name "AHCTF1"; gene_biotype "protein_coding"; oId "lv:circAHCTF1-895-001|ce:circAHCTF1-2012-001|ts:circAHCTF1-1578-001"; tissue "lv|ce|ts";
1	ncSplice	exon	210115712	210115843	.	+	.	gene_id "ENSMMUG00000016408"; transcript_id "rmCircRNA-86"; exon_number "3" gene_name "AHCTF1"; gene_biotype "protein_coding"; oId "lv:circAHCTF1-895-001|ce:circAHCTF1-2012-001|ts:circAHCTF1-1578-001"; tissue "lv|ce|ts";
1	ncSplice	exon	210116630	210116780	.	+	.	gene_id "ENSMMUG00000016408"; transcript_id "rmCircRNA-86"; exon_number "4" gene_name "AHCTF1"; gene_biotype "protein_coding"; oId "lv:circAHCTF1-895-001|ce:circAHCTF1-2012-001|ts:circAHCTF1-1578-001"; tissue "lv|ce|ts";
1	ncSplice	exon	210124921	210125071	.	+	.	gene_id "ENSMMUG00000016408"; transcript_id "rmCircRNA-86"; exon_number "5" gene_name "AHCTF1"; gene_biotype "protein_coding"; oId "lv:circAHCTF1-895-001|ce:circAHCTF1-2012-001|ts:circAHCTF1-1578-001"; tissue "lv|ce|ts";
12	ncSplice	gene	102144923	102146940	.	-	.	gene_id "ENSMMUG00000018930"; gene_name "PER2"; gene_source "ncSplice"; gene_biotype "protein_coding";
12	ncSplice	transcript	102144923	102146940	.	-	.	gene_id "ENSMMUG00000018930"; transcript_id "rmCircRNA-87"; gene_name "PER2"; gene_biotype "protein_coding"; transcript_biotype "circRNA"; oId "lv:circPER2-900-002|ce:circPER2-2021-002"; tissue "lv|ce";
12	ncSplice	exon	102144923	102145077	.	-	.	gene_id "ENSMMUG00000018930"; transcript_id "rmCircRNA-87"; exon_number "1" gene_name "PER2"; gene_biotype "protein_coding"; oId "lv:circPER2-900-002|ce:circPER2-2021-002"; tissue "lv|ce";
12	ncSplice	exon	102146117	102146179	.	-	.	gene_id "ENSMMUG00000018930"; transcript_id "rmCircRNA-87"; exon_number "2" gene_name "PER2"; gene_biotype "protein_coding"; oId "lv:circPER2-900-002|ce:circPER2-2021-002"; tissue "lv|ce";
12	ncSplice	exon	102146692	102146940	.	-	.	gene_id "ENSMMUG00000018930"; transcript_id "rmCircRNA-87"; exon_number "3" gene_name "PER2"; gene_biotype "protein_coding"; oId "lv:circPER2-900-002|ce:circPER2-2021-002"; tissue "lv|ce";
12	ncSplice	gene	103893296	103914750	.	-	.	gene_id "ENSMMUG00000010382"; gene_name "NDUFA10"; gene_source "ncSplice"; gene_biotype "protein_coding";
12	ncSplice	transcript	103893296	103914750	.	-	.	gene_id "ENSMMUG00000010382"; transcript_id "rmCircRNA-88"; gene_name "NDUFA10"; gene_biotype "protein_coding"; transcript_biotype "circRNA"; oId "lv:circNDUFA10-904-006"; tissue "lv";
12	ncSplice	exon	103893296	103893404	.	-	.	gene_id "ENSMMUG00000010382"; transcript_id "rmCircRNA-88"; exon_number "1" gene_name "NDUFA10"; gene_biotype "protein_coding"; oId "lv:circNDUFA10-904-006"; tissue "lv";
12	ncSplice	exon	103907755	103907840	.	-	.	gene_id "ENSMMUG00000010382"; transcript_id "rmCircRNA-88"; exon_number "2" gene_name "NDUFA10"; gene_biotype "protein_coding"; oId "lv:circNDUFA10-904-006"; tissue "lv";
12	ncSplice	exon	103909905	103909959	.	-	.	gene_id "ENSMMUG00000010382"; transcript_id "rmCircRNA-88"; exon_number "3" gene_name "NDUFA10"; gene_biotype "protein_coding"; oId "lv:circNDUFA10-904-006"; tissue "lv";
12	ncSplice	exon	103914671	103914750	.	-	.	gene_id "ENSMMUG00000010382"; transcript_id "rmCircRNA-88"; exon_number "4" gene_name "NDUFA10"; gene_biotype "protein_coding"; oId "lv:circNDUFA10-904-006"; tissue "lv";
12	ncSplice	gene	11444150	11447805	.	+	.	gene_id "ENSMMUG00000000042"; gene_name "ACVR2A"; gene_source "ncSplice"; gene_biotype "protein_coding";
12	ncSplice	transcript	11444150	11447805	.	+	.	gene_id "ENSMMUG00000000042"; transcript_id "rmCircRNA-89"; gene_name "ACVR2A"; gene_biotype "protein_coding"; transcript_biotype "circRNA"; oId "lv:circACVR2A-922-005|ce:circACVR2A-2052-004|ts:circACVR2A-1620-005"; tissue "lv|ce|ts";
12	ncSplice	exon	11444150	11444357	.	+	.	gene_id "ENSMMUG00000000042"; transcript_id "rmCircRNA-89"; exon_number "1" gene_name "ACVR2A"; gene_biotype "protein_coding"; oId "lv:circACVR2A-922-005|ce:circACVR2A-2052-004|ts:circACVR2A-1620-005"; tissue "lv|ce|ts";
12	ncSplice	exon	11447351	11447460	.	+	.	gene_id "ENSMMUG00000000042"; transcript_id "rmCircRNA-89"; exon_number "2" gene_name "ACVR2A"; gene_biotype "protein_coding"; oId "lv:circACVR2A-922-005|ce:circACVR2A-2052-004|ts:circACVR2A-1620-005"; tissue "lv|ce|ts";
12	ncSplice	exon	11447651	11447805	.	+	.	gene_id "ENSMMUG00000000042"; transcript_id "rmCircRNA-89"; exon_number "3" gene_name "ACVR2A"; gene_biotype "protein_coding"; oId "lv:circACVR2A-922-005|ce:circACVR2A-2052-004|ts:circACVR2A-1620-005"; tissue "lv|ce|ts";
1	ncSplice	gene	213683698	213694497	.	-	.	gene_id "ENSMMUG00000019994"; gene_name "SDCCAG8"; gene_source "ncSplice"; gene_biotype "protein_coding";
1	ncSplice	transcript	213683698	213694497	.	-	.	gene_id "ENSMMUG00000019994"; transcript_id "rmCircRNA-90"; gene_name "SDCCAG8"; gene_biotype "protein_coding"; transcript_biotype "circRNA"; oId "lv:circSDCCAG8-933-001|ce:circSDCCAG8-2092-001|ts:circSDCCAG8-1663-001"; tissue "lv|ce|ts";
1	ncSplice	exon	213683698	213683829	.	-	.	gene_id "ENSMMUG00000019994"; transcript_id "rmCircRNA-90"; exon_number "1" gene_name "SDCCAG8"; gene_biotype "protein_coding"; oId "lv:circSDCCAG8-933-001|ce:circSDCCAG8-2092-001|ts:circSDCCAG8-1663-001"; tissue "lv|ce|ts";
1	ncSplice	exon	213692131	213692239	.	-	.	gene_id "ENSMMUG00000019994"; transcript_id "rmCircRNA-90"; exon_number "2" gene_name "SDCCAG8"; gene_biotype "protein_coding"; oId "lv:circSDCCAG8-933-001|ce:circSDCCAG8-2092-001|ts:circSDCCAG8-1663-001"; tissue "lv|ce|ts";
1	ncSplice	exon	213694370	213694497	.	-	.	gene_id "ENSMMUG00000019994"; transcript_id "rmCircRNA-90"; exon_number "3" gene_name "SDCCAG8"; gene_biotype "protein_coding"; oId "lv:circSDCCAG8-933-001|ce:circSDCCAG8-2092-001|ts:circSDCCAG8-1663-001"; tissue "lv|ce|ts";
12	ncSplice	gene	16322000	16323148	.	-	.	gene_id "ENSMMUG00000010812"; gene_name "PRPF40A"; gene_source "ncSplice"; gene_biotype "protein_coding";
12	ncSplice	transcript	16322000	16323148	.	-	.	gene_id "ENSMMUG00000010812"; transcript_id "rmCircRNA-91"; gene_name "PRPF40A"; gene_biotype "protein_coding"; transcript_biotype "circRNA"; oId "lv:circPRPF40A-945-002|ce:circPRPF40A-2135-003"; tissue "lv|ce";
12	ncSplice	exon	16322000	16322150	.	-	.	gene_id "ENSMMUG00000010812"; transcript_id "rmCircRNA-91"; exon_number "1" gene_name "PRPF40A"; gene_biotype "protein_coding"; oId "lv:circPRPF40A-945-002|ce:circPRPF40A-2135-003"; tissue "lv|ce";
12	ncSplice	exon	16323040	16323148	.	-	.	gene_id "ENSMMUG00000010812"; transcript_id "rmCircRNA-91"; exon_number "2" gene_name "PRPF40A"; gene_biotype "protein_coding"; oId "lv:circPRPF40A-945-002|ce:circPRPF40A-2135-003"; tissue "lv|ce";
12	ncSplice	gene	21330704	21332015	.	-	.	gene_id "ENSMMUG00000018497"; gene_name "ACVR1"; gene_source "ncSplice"; gene_biotype "protein_coding";
12	ncSplice	transcript	21330704	21332015	.	-	.	gene_id "ENSMMUG00000018497"; transcript_id "rmCircRNA-92"; gene_name "ACVR1"; gene_biotype "protein_coding"; transcript_biotype "circRNA"; oId "lv:circACVR1-959-001"; tissue "lv";
12	ncSplice	exon	21330704	21331098	.	-	.	gene_id "ENSMMUG00000018497"; transcript_id "rmCircRNA-92"; exon_number "1" gene_name "ACVR1"; gene_biotype "protein_coding"; oId "lv:circACVR1-959-001"; tissue "lv";
12	ncSplice	exon	21331885	21332015	.	-	.	gene_id "ENSMMUG00000018497"; transcript_id "rmCircRNA-92"; exon_number "2" gene_name "ACVR1"; gene_biotype "protein_coding"; oId "lv:circACVR1-959-001"; tissue "lv";
1	ncSplice	gene	221568838	221574424	.	-	.	gene_id "ENSMMUG00000008426"; gene_name "TBCE"; gene_source "ncSplice"; gene_biotype "protein_coding";
1	ncSplice	transcript	221568838	221574424	.	-	.	gene_id "ENSMMUG00000008426"; transcript_id "rmCircRNA-93"; gene_name "TBCE"; gene_biotype "protein_coding"; transcript_biotype "circRNA"; oId "lv:circTBCE-964-004|ce:circTBCE-2215-003"; tissue "lv|ce";
1	ncSplice	exon	221568838	221568897	.	-	.	gene_id "ENSMMUG00000008426"; transcript_id "rmCircRNA-93"; exon_number "1" gene_name "TBCE"; gene_biotype "protein_coding"; oId "lv:circTBCE-964-004|ce:circTBCE-2215-003"; tissue "lv|ce";
1	ncSplice	exon	221569877	221569945	.	-	.	gene_id "ENSMMUG00000008426"; transcript_id "rmCircRNA-93"; exon_number "2" gene_name "TBCE"; gene_biotype "protein_coding"; oId "lv:circTBCE-964-004|ce:circTBCE-2215-003"; tissue "lv|ce";
1	ncSplice	exon	221572818	221572971	.	-	.	gene_id "ENSMMUG00000008426"; transcript_id "rmCircRNA-93"; exon_number "3" gene_name "TBCE"; gene_biotype "protein_coding"; oId "lv:circTBCE-964-004|ce:circTBCE-2215-003"; tissue "lv|ce";
1	ncSplice	exon	221574272	221574424	.	-	.	gene_id "ENSMMUG00000008426"; transcript_id "rmCircRNA-93"; exon_number "4" gene_name "TBCE"; gene_biotype "protein_coding"; oId "lv:circTBCE-964-004|ce:circTBCE-2215-003"; tissue "lv|ce";
1	ncSplice	gene	221572818	221574424	.	-	.	gene_id "ENSMMUG00000008426"; gene_name "TBCE"; gene_source "ncSplice"; gene_biotype "protein_coding";
1	ncSplice	transcript	221572818	221574424	.	-	.	gene_id "ENSMMUG00000008426"; transcript_id "rmCircRNA-94"; gene_name "TBCE"; gene_biotype "protein_coding"; transcript_biotype "circRNA"; oId "lv:circTBCE-965-002"; tissue "lv";
1	ncSplice	exon	221572818	221572971	.	-	.	gene_id "ENSMMUG00000008426"; transcript_id "rmCircRNA-94"; exon_number "1" gene_name "TBCE"; gene_biotype "protein_coding"; oId "lv:circTBCE-965-002"; tissue "lv";
1	ncSplice	exon	221574272	221574424	.	-	.	gene_id "ENSMMUG00000008426"; transcript_id "rmCircRNA-94"; exon_number "2" gene_name "TBCE"; gene_biotype "protein_coding"; oId "lv:circTBCE-965-002"; tissue "lv";
1	ncSplice	gene	227653263	227670273	.	-	.	gene_id "ENSMMUG00000017720"; gene_name "RAB4A"; gene_source "ncSplice"; gene_biotype "protein_coding";
1	ncSplice	transcript	227653263	227670273	.	-	.	gene_id "ENSMMUG00000017720"; transcript_id "rmCircRNA-95"; gene_name "RAB4A"; gene_biotype "protein_coding"; transcript_biotype "circRNA"; oId "lv:circRAB4A-988-002|ce:circRAB4A-2331-002"; tissue "lv|ce";
1	ncSplice	exon	227653263	227653458	.	-	.	gene_id "ENSMMUG00000017720"; transcript_id "rmCircRNA-95"; exon_number "1" gene_name "RAB4A"; gene_biotype "protein_coding"; oId "lv:circRAB4A-988-002|ce:circRAB4A-2331-002"; tissue "lv|ce";
1	ncSplice	exon	227654294	227654416	.	-	.	gene_id "ENSMMUG00000017720"; transcript_id "rmCircRNA-95"; exon_number "2" gene_name "RAB4A"; gene_biotype "protein_coding"; oId "lv:circRAB4A-988-002|ce:circRAB4A-2331-002"; tissue "lv|ce";
1	ncSplice	exon	227658158	227658253	.	-	.	gene_id "ENSMMUG00000017720"; transcript_id "rmCircRNA-95"; exon_number "3" gene_name "RAB4A"; gene_biotype "protein_coding"; oId "lv:circRAB4A-988-002|ce:circRAB4A-2331-002"; tissue "lv|ce";
1	ncSplice	exon	227659609	227659763	.	-	.	gene_id "ENSMMUG00000017720"; transcript_id "rmCircRNA-95"; exon_number "4" gene_name "RAB4A"; gene_biotype "protein_coding"; oId "lv:circRAB4A-988-002|ce:circRAB4A-2331-002"; tissue "lv|ce";
1	ncSplice	exon	227661337	227661399	.	-	.	gene_id "ENSMMUG00000017720"; transcript_id "rmCircRNA-95"; exon_number "5" gene_name "RAB4A"; gene_biotype "protein_coding"; oId "lv:circRAB4A-988-002|ce:circRAB4A-2331-002"; tissue "lv|ce";
1	ncSplice	exon	227667960	227668074	.	-	.	gene_id "ENSMMUG00000017720"; transcript_id "rmCircRNA-95"; exon_number "6" gene_name "RAB4A"; gene_biotype "protein_coding"; oId "lv:circRAB4A-988-002|ce:circRAB4A-2331-002"; tissue "lv|ce";
1	ncSplice	exon	227670193	227670273	.	-	.	gene_id "ENSMMUG00000017720"; transcript_id "rmCircRNA-95"; exon_number "7" gene_name "RAB4A"; gene_biotype "protein_coding"; oId "lv:circRAB4A-988-002|ce:circRAB4A-2331-002"; tissue "lv|ce";
12	ncSplice	gene	28361924	28384322	.	-	.	gene_id "ENSMMUG00000009400"; gene_name "COBLL1"; gene_source "ncSplice"; gene_biotype "protein_coding";
12	ncSplice	transcript	28361924	28384322	.	-	.	gene_id "ENSMMUG00000009400"; transcript_id "rmCircRNA-96"; gene_name "COBLL1"; gene_biotype "protein_coding"; transcript_biotype "circRNA"; oId "lv:circCOBLL1-990-002"; tissue "lv";
12	ncSplice	exon	28361924	28362371	.	-	.	gene_id "ENSMMUG00000009400"; transcript_id "rmCircRNA-96"; exon_number "1" gene_name "COBLL1"; gene_biotype "protein_coding"; oId "lv:circCOBLL1-990-002"; tissue "lv";
12	ncSplice	exon	28366946	28366984	.	-	.	gene_id "ENSMMUG00000009400"; transcript_id "rmCircRNA-96"; exon_number "2" gene_name "COBLL1"; gene_biotype "protein_coding"; oId "lv:circCOBLL1-990-002"; tissue "lv";
12	ncSplice	exon	28367825	28368053	.	-	.	gene_id "ENSMMUG00000009400"; transcript_id "rmCircRNA-96"; exon_number "3" gene_name "COBLL1"; gene_biotype "protein_coding"; oId "lv:circCOBLL1-990-002"; tissue "lv";
12	ncSplice	exon	28370099	28370300	.	-	.	gene_id "ENSMMUG00000009400"; transcript_id "rmCircRNA-96"; exon_number "4" gene_name "COBLL1"; gene_biotype "protein_coding"; oId "lv:circCOBLL1-990-002"; tissue "lv";
12	ncSplice	exon	28384134	28384322	.	-	.	gene_id "ENSMMUG00000009400"; transcript_id "rmCircRNA-96"; exon_number "5" gene_name "COBLL1"; gene_biotype "protein_coding"; oId "lv:circCOBLL1-990-002"; tissue "lv";
12	ncSplice	gene	30108128	30136429	.	-	.	gene_id "ENSMMUG00000002297"; gene_name "SCN7A"; gene_source "ncSplice"; gene_biotype "protein_coding";
12	ncSplice	transcript	30108128	30136429	.	-	.	gene_id "ENSMMUG00000002297"; transcript_id "rmCircRNA-97"; gene_name "SCN7A"; gene_biotype "protein_coding"; transcript_biotype "circRNA"; oId "lv:circSCN7A-994-006"; tissue "lv";
12	ncSplice	exon	30108128	30108224	.	-	.	gene_id "ENSMMUG00000002297"; transcript_id "rmCircRNA-97"; exon_number "1" gene_name "SCN7A"; gene_biotype "protein_coding"; oId "lv:circSCN7A-994-006"; tissue "lv";
12	ncSplice	exon	30121286	30121492	.	-	.	gene_id "ENSMMUG00000002297"; transcript_id "rmCircRNA-97"; exon_number "2" gene_name "SCN7A"; gene_biotype "protein_coding"; oId "lv:circSCN7A-994-006"; tissue "lv";
12	ncSplice	exon	30126485	30126626	.	-	.	gene_id "ENSMMUG00000002297"; transcript_id "rmCircRNA-97"; exon_number "3" gene_name "SCN7A"; gene_biotype "protein_coding"; oId "lv:circSCN7A-994-006"; tissue "lv";
12	ncSplice	exon	30129463	30129532	.	-	.	gene_id "ENSMMUG00000002297"; transcript_id "rmCircRNA-97"; exon_number "4" gene_name "SCN7A"; gene_biotype "protein_coding"; oId "lv:circSCN7A-994-006"; tissue "lv";
12	ncSplice	exon	30129803	30130009	.	-	.	gene_id "ENSMMUG00000002297"; transcript_id "rmCircRNA-97"; exon_number "5" gene_name "SCN7A"; gene_biotype "protein_coding"; oId "lv:circSCN7A-994-006"; tissue "lv";
12	ncSplice	exon	30134722	30134813	.	-	.	gene_id "ENSMMUG00000002297"; transcript_id "rmCircRNA-97"; exon_number "6" gene_name "SCN7A"; gene_biotype "protein_coding"; oId "lv:circSCN7A-994-006"; tissue "lv";
12	ncSplice	exon	30136301	30136429	.	-	.	gene_id "ENSMMUG00000002297"; transcript_id "rmCircRNA-97"; exon_number "7" gene_name "SCN7A"; gene_biotype "protein_coding"; oId "lv:circSCN7A-994-006"; tissue "lv";
12	ncSplice	gene	34725675	34729733	.	-	.	gene_id "ENSMMUG00000011189"; gene_name "TLK1"; gene_source "ncSplice"; gene_biotype "protein_coding";
12	ncSplice	transcript	34725675	34729733	.	-	.	gene_id "ENSMMUG00000011189"; transcript_id "rmCircRNA-98"; gene_name "TLK1"; gene_biotype "protein_coding"; transcript_biotype "circRNA"; oId "lv:circTLK1-1029-001|ce:circTLK1-2414-001"; tissue "lv|ce";
12	ncSplice	exon	34725675	34725863	.	-	.	gene_id "ENSMMUG00000011189"; transcript_id "rmCircRNA-98"; exon_number "1" gene_name "TLK1"; gene_biotype "protein_coding"; oId "lv:circTLK1-1029-001|ce:circTLK1-2414-001"; tissue "lv|ce";
12	ncSplice	exon	34729370	34729506	.	-	.	gene_id "ENSMMUG00000011189"; transcript_id "rmCircRNA-98"; exon_number "2" gene_name "TLK1"; gene_biotype "protein_coding"; oId "lv:circTLK1-1029-001|ce:circTLK1-2414-001"; tissue "lv|ce";
12	ncSplice	exon	34729623	34729733	.	-	.	gene_id "ENSMMUG00000011189"; transcript_id "rmCircRNA-98"; exon_number "3" gene_name "TLK1"; gene_biotype "protein_coding"; oId "lv:circTLK1-1029-001|ce:circTLK1-2414-001"; tissue "lv|ce";
1	ncSplice	gene	23631001	23643099	.	-	.	gene_id "ENSMMUG00000004149"; gene_name "NA"; gene_source "ncSplice"; gene_biotype "protein_coding";
1	ncSplice	transcript	23631001	23643099	.	-	.	gene_id "ENSMMUG00000004149"; transcript_id "rmCircRNA-99"; gene_name "NA"; gene_biotype "protein_coding"; transcript_biotype "circRNA"; oId "lv:circNA-1037-001"; tissue "lv";
1	ncSplice	exon	23631001	23631123	.	-	.	gene_id "ENSMMUG00000004149"; transcript_id "rmCircRNA-99"; exon_number "1" gene_name "NA"; gene_biotype "protein_coding"; oId "lv:circNA-1037-001"; tissue "lv";
1	ncSplice	exon	23634541	23634638	.	-	.	gene_id "ENSMMUG00000004149"; transcript_id "rmCircRNA-99"; exon_number "2" gene_name "NA"; gene_biotype "protein_coding"; oId "lv:circNA-1037-001"; tissue "lv";
1	ncSplice	exon	23642199	23642313	.	-	.	gene_id "ENSMMUG00000004149"; transcript_id "rmCircRNA-99"; exon_number "3" gene_name "NA"; gene_biotype "protein_coding"; oId "lv:circNA-1037-001"; tissue "lv";
1	ncSplice	exon	23642920	23643099	.	-	.	gene_id "ENSMMUG00000004149"; transcript_id "rmCircRNA-99"; exon_number "4" gene_name "NA"; gene_biotype "protein_coding"; oId "lv:circNA-1037-001"; tissue "lv";
1	ncSplice	gene	24320910	24326792	.	-	.	gene_id "ENSMMUG00000017344"; gene_name "USP48"; gene_source "ncSplice"; gene_biotype "protein_coding";
1	ncSplice	transcript	24320910	24326792	.	-	.	gene_id "ENSMMUG00000017344"; transcript_id "rmCircRNA-100"; gene_name "USP48"; gene_biotype "protein_coding"; transcript_biotype "circRNA"; oId "lv:circUSP48-1056-001|ce:circUSP48-2483-001"; tissue "lv|ce";
1	ncSplice	exon	24320910	24320978	.	-	.	gene_id "ENSMMUG00000017344"; transcript_id "rmCircRNA-100"; exon_number "1" gene_name "USP48"; gene_biotype "protein_coding"; oId "lv:circUSP48-1056-001|ce:circUSP48-2483-001"; tissue "lv|ce";
1	ncSplice	exon	24325810	24326792	.	-	.	gene_id "ENSMMUG00000017344"; transcript_id "rmCircRNA-100"; exon_number "2" gene_name "USP48"; gene_biotype "protein_coding"; oId "lv:circUSP48-1056-001|ce:circUSP48-2483-001"; tissue "lv|ce";
12	ncSplice	gene	44550258	44552325	.	+	.	gene_id "ENSMMUG00000008069"; gene_name "UBE2E3"; gene_source "ncSplice"; gene_biotype "protein_coding";
12	ncSplice	transcript	44550258	44552325	.	+	.	gene_id "ENSMMUG00000008069"; transcript_id "rmCircRNA-101"; gene_name "UBE2E3"; gene_biotype "protein_coding"; transcript_biotype "circRNA"; oId "lv:circUBE2E3-1058-001"; tissue "lv";
12	ncSplice	exon	44550258	44551206	.	+	.	gene_id "ENSMMUG00000008069"; transcript_id "rmCircRNA-101"; exon_number "1" gene_name "UBE2E3"; gene_biotype "protein_coding"; oId "lv:circUBE2E3-1058-001"; tissue "lv";
12	ncSplice	exon	44552275	44552325	.	+	.	gene_id "ENSMMUG00000008069"; transcript_id "rmCircRNA-101"; exon_number "2" gene_name "UBE2E3"; gene_biotype "protein_coding"; oId "lv:circUBE2E3-1058-001"; tissue "lv";
12	ncSplice	gene	53467362	53494837	.	+	.	gene_id "ENSMMUG00000014318"; gene_name "PMS1"; gene_source "ncSplice"; gene_biotype "protein_coding";
12	ncSplice	transcript	53467362	53494837	.	+	.	gene_id "ENSMMUG00000014318"; transcript_id "rmCircRNA-102"; gene_name "PMS1"; gene_biotype "protein_coding"; transcript_biotype "circRNA"; oId "lv:circPMS1-1069-001"; tissue "lv";
12	ncSplice	exon	53467362	53467513	.	+	.	gene_id "ENSMMUG00000014318"; transcript_id "rmCircRNA-102"; exon_number "1" gene_name "PMS1"; gene_biotype "protein_coding"; oId "lv:circPMS1-1069-001"; tissue "lv";
12	ncSplice	exon	53471587	53471769	.	+	.	gene_id "ENSMMUG00000014318"; transcript_id "rmCircRNA-102"; exon_number "2" gene_name "PMS1"; gene_biotype "protein_coding"; oId "lv:circPMS1-1069-001"; tissue "lv";
12	ncSplice	exon	53481765	53481867	.	+	.	gene_id "ENSMMUG00000014318"; transcript_id "rmCircRNA-102"; exon_number "3" gene_name "PMS1"; gene_biotype "protein_coding"; oId "lv:circPMS1-1069-001"; tissue "lv";
12	ncSplice	exon	53494674	53494837	.	+	.	gene_id "ENSMMUG00000014318"; transcript_id "rmCircRNA-102"; exon_number "4" gene_name "PMS1"; gene_biotype "protein_coding"; oId "lv:circPMS1-1069-001"; tissue "lv";
12	ncSplice	gene	54371606	54384574	.	+	.	gene_id "ENSMMUG00000022664"; gene_name "NAB1"; gene_source "ncSplice"; gene_biotype "protein_coding";
12	ncSplice	transcript	54371606	54384574	.	+	.	gene_id "ENSMMUG00000022664"; transcript_id "rmCircRNA-103"; gene_name "NAB1"; gene_biotype "protein_coding"; transcript_biotype "circRNA"; oId "lv:circNAB1-1070-001|ts:circNAB1-1889-001"; tissue "lv|ts";
12	ncSplice	exon	54371606	54372443	.	+	.	gene_id "ENSMMUG00000022664"; transcript_id "rmCircRNA-103"; exon_number "1" gene_name "NAB1"; gene_biotype "protein_coding"; oId "lv:circNAB1-1070-001|ts:circNAB1-1889-001"; tissue "lv|ts";
12	ncSplice	exon	54381750	54381883	.	+	.	gene_id "ENSMMUG00000022664"; transcript_id "rmCircRNA-103"; exon_number "2" gene_name "NAB1"; gene_biotype "protein_coding"; oId "lv:circNAB1-1070-001|ts:circNAB1-1889-001"; tissue "lv|ts";
12	ncSplice	exon	54384523	54384574	.	+	.	gene_id "ENSMMUG00000022664"; transcript_id "rmCircRNA-103"; exon_number "3" gene_name "NAB1"; gene_biotype "protein_coding"; oId "lv:circNAB1-1070-001|ts:circNAB1-1889-001"; tissue "lv|ts";
1	ncSplice	gene	26000831	26020809	.	-	.	gene_id "ENSMMUG00000010977"; gene_name "TCEA3"; gene_source "ncSplice"; gene_biotype "protein_coding";
1	ncSplice	transcript	26000831	26020809	.	-	.	gene_id "ENSMMUG00000010977"; transcript_id "rmCircRNA-104"; gene_name "TCEA3"; gene_biotype "protein_coding"; transcript_biotype "circRNA"; oId "lv:circTCEA3-1079-001"; tissue "lv";
1	ncSplice	exon	26000831	26000887	.	-	.	gene_id "ENSMMUG00000010977"; transcript_id "rmCircRNA-104"; exon_number "1" gene_name "TCEA3"; gene_biotype "protein_coding"; oId "lv:circTCEA3-1079-001"; tissue "lv";
1	ncSplice	exon	26001078	26001241	.	-	.	gene_id "ENSMMUG00000010977"; transcript_id "rmCircRNA-104"; exon_number "2" gene_name "TCEA3"; gene_biotype "protein_coding"; oId "lv:circTCEA3-1079-001"; tissue "lv";
1	ncSplice	exon	26012748	26012810	.	-	.	gene_id "ENSMMUG00000010977"; transcript_id "rmCircRNA-104"; exon_number "3" gene_name "TCEA3"; gene_biotype "protein_coding"; oId "lv:circTCEA3-1079-001"; tissue "lv";
1	ncSplice	exon	26020041	26020182	.	-	.	gene_id "ENSMMUG00000010977"; transcript_id "rmCircRNA-104"; exon_number "4" gene_name "TCEA3"; gene_biotype "protein_coding"; oId "lv:circTCEA3-1079-001"; tissue "lv";
1	ncSplice	exon	26020697	26020809	.	-	.	gene_id "ENSMMUG00000010977"; transcript_id "rmCircRNA-104"; exon_number "5" gene_name "TCEA3"; gene_biotype "protein_coding"; oId "lv:circTCEA3-1079-001"; tissue "lv";
12	ncSplice	gene	60416489	60417357	.	-	.	gene_id "ENSMMUG00000008643"; gene_name "GTF3C3"; gene_source "ncSplice"; gene_biotype "protein_coding";
12	ncSplice	transcript	60416489	60417357	.	-	.	gene_id "ENSMMUG00000008643"; transcript_id "rmCircRNA-105"; gene_name "GTF3C3"; gene_biotype "protein_coding"; transcript_biotype "circRNA"; oId "lv:circGTF3C3-1082-001|ce:circGTF3C3-2544-001"; tissue "lv|ce";
12	ncSplice	exon	60416489	60416654	.	-	.	gene_id "ENSMMUG00000008643"; transcript_id "rmCircRNA-105"; exon_number "1" gene_name "GTF3C3"; gene_biotype "protein_coding"; oId "lv:circGTF3C3-1082-001|ce:circGTF3C3-2544-001"; tissue "lv|ce";
12	ncSplice	exon	60417166	60417357	.	-	.	gene_id "ENSMMUG00000008643"; transcript_id "rmCircRNA-105"; exon_number "2" gene_name "GTF3C3"; gene_biotype "protein_coding"; oId "lv:circGTF3C3-1082-001|ce:circGTF3C3-2544-001"; tissue "lv|ce";
12	ncSplice	gene	64199097	64233195	.	+	.	gene_id "ENSMMUG00000021931"; gene_name "AOX1"; gene_source "ncSplice"; gene_biotype "protein_coding";
12	ncSplice	transcript	64199097	64233195	.	+	.	gene_id "ENSMMUG00000021931"; transcript_id "rmCircRNA-106"; gene_name "AOX1"; gene_biotype "protein_coding"; transcript_biotype "circRNA"; oId "lv:circAOX1-1093-001"; tissue "lv";
12	ncSplice	exon	64199097	64199275	.	+	.	gene_id "ENSMMUG00000021931"; transcript_id "rmCircRNA-106"; exon_number "1" gene_name "AOX1"; gene_biotype "protein_coding"; oId "lv:circAOX1-1093-001"; tissue "lv";
12	ncSplice	exon	64199445	64199538	.	+	.	gene_id "ENSMMUG00000021931"; transcript_id "rmCircRNA-106"; exon_number "2" gene_name "AOX1"; gene_biotype "protein_coding"; oId "lv:circAOX1-1093-001"; tissue "lv";
12	ncSplice	exon	64201503	64202867	.	+	.	gene_id "ENSMMUG00000021931"; transcript_id "rmCircRNA-106"; exon_number "3" gene_name "AOX1"; gene_biotype "protein_coding"; oId "lv:circAOX1-1093-001"; tissue "lv";
12	ncSplice	exon	64203698	64203860	.	+	.	gene_id "ENSMMUG00000021931"; transcript_id "rmCircRNA-106"; exon_number "4" gene_name "AOX1"; gene_biotype "protein_coding"; oId "lv:circAOX1-1093-001"; tissue "lv";
12	ncSplice	exon	64205858	64205950	.	+	.	gene_id "ENSMMUG00000021931"; transcript_id "rmCircRNA-106"; exon_number "5" gene_name "AOX1"; gene_biotype "protein_coding"; oId "lv:circAOX1-1093-001"; tissue "lv";
12	ncSplice	exon	64210584	64210753	.	+	.	gene_id "ENSMMUG00000021931"; transcript_id "rmCircRNA-106"; exon_number "6" gene_name "AOX1"; gene_biotype "protein_coding"; oId "lv:circAOX1-1093-001"; tissue "lv";
12	ncSplice	exon	64211053	64211179	.	+	.	gene_id "ENSMMUG00000021931"; transcript_id "rmCircRNA-106"; exon_number "7" gene_name "AOX1"; gene_biotype "protein_coding"; oId "lv:circAOX1-1093-001"; tissue "lv";
12	ncSplice	exon	64213804	64213926	.	+	.	gene_id "ENSMMUG00000021931"; transcript_id "rmCircRNA-106"; exon_number "8" gene_name "AOX1"; gene_biotype "protein_coding"; oId "lv:circAOX1-1093-001"; tissue "lv";
12	ncSplice	exon	64217276	64225016	.	+	.	gene_id "ENSMMUG00000021931"; transcript_id "rmCircRNA-106"; exon_number "9" gene_name "AOX1"; gene_biotype "protein_coding"; oId "lv:circAOX1-1093-001"; tissue "lv";
12	ncSplice	exon	64227074	64227207	.	+	.	gene_id "ENSMMUG00000021931"; transcript_id "rmCircRNA-106"; exon_number "10" gene_name "AOX1"; gene_biotype "protein_coding"; oId "lv:circAOX1-1093-001"; tissue "lv";
12	ncSplice	exon	64228363	64228450	.	+	.	gene_id "ENSMMUG00000021931"; transcript_id "rmCircRNA-106"; exon_number "11" gene_name "AOX1"; gene_biotype "protein_coding"; oId "lv:circAOX1-1093-001"; tissue "lv";
12	ncSplice	exon	64231202	64231288	.	+	.	gene_id "ENSMMUG00000021931"; transcript_id "rmCircRNA-106"; exon_number "12" gene_name "AOX1"; gene_biotype "protein_coding"; oId "lv:circAOX1-1093-001"; tissue "lv";
12	ncSplice	exon	64233130	64233195	.	+	.	gene_id "ENSMMUG00000021931"; transcript_id "rmCircRNA-106"; exon_number "13" gene_name "AOX1"; gene_biotype "protein_coding"; oId "lv:circAOX1-1093-001"; tissue "lv";
12	ncSplice	gene	64224892	64233195	.	+	.	gene_id "ENSMMUG00000021931"; gene_name "AOX1"; gene_source "ncSplice"; gene_biotype "protein_coding";
12	ncSplice	transcript	64224892	64233195	.	+	.	gene_id "ENSMMUG00000021931"; transcript_id "rmCircRNA-107"; gene_name "AOX1"; gene_biotype "protein_coding"; transcript_biotype "circRNA"; oId "lv:circAOX1-1098-001"; tissue "lv";
12	ncSplice	exon	64224892	64225016	.	+	.	gene_id "ENSMMUG00000021931"; transcript_id "rmCircRNA-107"; exon_number "1" gene_name "AOX1"; gene_biotype "protein_coding"; oId "lv:circAOX1-1098-001"; tissue "lv";
12	ncSplice	exon	64227074	64227207	.	+	.	gene_id "ENSMMUG00000021931"; transcript_id "rmCircRNA-107"; exon_number "2" gene_name "AOX1"; gene_biotype "protein_coding"; oId "lv:circAOX1-1098-001"; tissue "lv";
12	ncSplice	exon	64228363	64228450	.	+	.	gene_id "ENSMMUG00000021931"; transcript_id "rmCircRNA-107"; exon_number "3" gene_name "AOX1"; gene_biotype "protein_coding"; oId "lv:circAOX1-1098-001"; tissue "lv";
12	ncSplice	exon	64231202	64231288	.	+	.	gene_id "ENSMMUG00000021931"; transcript_id "rmCircRNA-107"; exon_number "4" gene_name "AOX1"; gene_biotype "protein_coding"; oId "lv:circAOX1-1098-001"; tissue "lv";
12	ncSplice	exon	64233130	64233195	.	+	.	gene_id "ENSMMUG00000021931"; transcript_id "rmCircRNA-107"; exon_number "5" gene_name "AOX1"; gene_biotype "protein_coding"; oId "lv:circAOX1-1098-001"; tissue "lv";
12	ncSplice	gene	64539251	64544681	.	-	.	gene_id "12:64539250:64544681:-1"; gene_name "12:64539250:64544681:-1"; gene_source "ncSplice"; gene_biotype "novel";
12	ncSplice	transcript	64539251	64544681	.	-	.	gene_id "12:64539250:64544681:-1"; transcript_id "rmCircRNA-108"; gene_name "12:64539250:64544681:-1"; gene_biotype "novel"; transcript_biotype "circRNA"; oId "lv:circ12:64539250:64544681:-1-1101-001"; tissue "lv";
12	ncSplice	exon	64539251	64539477	.	-	.	gene_id "12:64539250:64544681:-1"; transcript_id "rmCircRNA-108"; exon_number "1" gene_name "12:64539250:64544681:-1"; gene_biotype "novel"; oId "lv:circ12:64539250:64544681:-1-1101-001"; tissue "lv";
12	ncSplice	exon	64544564	64544681	.	-	.	gene_id "12:64539250:64544681:-1"; transcript_id "rmCircRNA-108"; exon_number "2" gene_name "12:64539250:64544681:-1"; gene_biotype "novel"; oId "lv:circ12:64539250:64544681:-1-1101-001"; tissue "lv";
12	ncSplice	gene	64893832	64898485	.	+	.	gene_id "ENSMMUG00000012310"; gene_name "CFLAR"; gene_source "ncSplice"; gene_biotype "protein_coding";
12	ncSplice	transcript	64893832	64898485	.	+	.	gene_id "ENSMMUG00000012310"; transcript_id "rmCircRNA-109"; gene_name "CFLAR"; gene_biotype "protein_coding"; transcript_biotype "circRNA"; oId "lv:circCFLAR-1110-001|ts:circCFLAR-1943-001"; tissue "lv|ts";
12	ncSplice	exon	64893832	64893886	.	+	.	gene_id "ENSMMUG00000012310"; transcript_id "rmCircRNA-109"; exon_number "1" gene_name "CFLAR"; gene_biotype "protein_coding"; oId "lv:circCFLAR-1110-001|ts:circCFLAR-1943-001"; tissue "lv|ts";
12	ncSplice	exon	64897655	64897704	.	+	.	gene_id "ENSMMUG00000012310"; transcript_id "rmCircRNA-109"; exon_number "2" gene_name "CFLAR"; gene_biotype "protein_coding"; oId "lv:circCFLAR-1110-001|ts:circCFLAR-1943-001"; tissue "lv|ts";
12	ncSplice	exon	64898404	64898485	.	+	.	gene_id "ENSMMUG00000012310"; transcript_id "rmCircRNA-109"; exon_number "3" gene_name "CFLAR"; gene_biotype "protein_coding"; oId "lv:circCFLAR-1110-001|ts:circCFLAR-1943-001"; tissue "lv|ts";
12	ncSplice	gene	64893832	64900252	.	+	.	gene_id "ENSMMUG00000012310"; gene_name "CFLAR"; gene_source "ncSplice"; gene_biotype "protein_coding";
12	ncSplice	transcript	64893832	64900252	.	+	.	gene_id "ENSMMUG00000012310"; transcript_id "rmCircRNA-110"; gene_name "CFLAR"; gene_biotype "protein_coding"; transcript_biotype "circRNA"; oId "lv:circCFLAR-1111-001"; tissue "lv";
12	ncSplice	exon	64893832	64893886	.	+	.	gene_id "ENSMMUG00000012310"; transcript_id "rmCircRNA-110"; exon_number "1" gene_name "CFLAR"; gene_biotype "protein_coding"; oId "lv:circCFLAR-1111-001"; tissue "lv";
12	ncSplice	exon	64897655	64897704	.	+	.	gene_id "ENSMMUG00000012310"; transcript_id "rmCircRNA-110"; exon_number "2" gene_name "CFLAR"; gene_biotype "protein_coding"; oId "lv:circCFLAR-1111-001"; tissue "lv";
12	ncSplice	exon	64900171	64900252	.	+	.	gene_id "ENSMMUG00000012310"; transcript_id "rmCircRNA-110"; exon_number "3" gene_name "CFLAR"; gene_biotype "protein_coding"; oId "lv:circCFLAR-1111-001"; tissue "lv";
12	ncSplice	gene	66324641	66327107	.	+	.	gene_id "ENSMMUG00000009009"; gene_name "BMPR2"; gene_source "ncSplice"; gene_biotype "protein_coding";
12	ncSplice	transcript	66324641	66327107	.	+	.	gene_id "ENSMMUG00000009009"; transcript_id "rmCircRNA-111"; gene_name "BMPR2"; gene_biotype "protein_coding"; transcript_biotype "circRNA"; oId "lv:circBMPR2-1117-001|ce:circBMPR2-2592-001|ts:circBMPR2-1956-001"; tissue "lv|ce|ts";
12	ncSplice	exon	66324641	66324811	.	+	.	gene_id "ENSMMUG00000009009"; transcript_id "rmCircRNA-111"; exon_number "1" gene_name "BMPR2"; gene_biotype "protein_coding"; oId "lv:circBMPR2-1117-001|ce:circBMPR2-2592-001|ts:circBMPR2-1956-001"; tissue "lv|ce|ts";
12	ncSplice	exon	66326937	66327107	.	+	.	gene_id "ENSMMUG00000009009"; transcript_id "rmCircRNA-111"; exon_number "2" gene_name "BMPR2"; gene_biotype "protein_coding"; oId "lv:circBMPR2-1117-001|ce:circBMPR2-2592-001|ts:circBMPR2-1956-001"; tissue "lv|ce|ts";
12	ncSplice	gene	66610778	66614980	.	+	.	gene_id "ENSMMUG00000021152"; gene_name "FAM117B"; gene_source "ncSplice"; gene_biotype "protein_coding";
12	ncSplice	transcript	66610778	66614980	.	+	.	gene_id "ENSMMUG00000021152"; transcript_id "rmCircRNA-112"; gene_name "FAM117B"; gene_biotype "protein_coding"; transcript_biotype "circRNA"; oId "lv:circFAM117B-1120-001|ce:circFAM117B-2597-001|ts:circFAM117B-1964-001"; tissue "lv|ce|ts";
12	ncSplice	exon	66610778	66610921	.	+	.	gene_id "ENSMMUG00000021152"; transcript_id "rmCircRNA-112"; exon_number "1" gene_name "FAM117B"; gene_biotype "protein_coding"; oId "lv:circFAM117B-1120-001|ce:circFAM117B-2597-001|ts:circFAM117B-1964-001"; tissue "lv|ce|ts";
12	ncSplice	exon	66612526	66612751	.	+	.	gene_id "ENSMMUG00000021152"; transcript_id "rmCircRNA-112"; exon_number "2" gene_name "FAM117B"; gene_biotype "protein_coding"; oId "lv:circFAM117B-1120-001|ce:circFAM117B-2597-001|ts:circFAM117B-1964-001"; tissue "lv|ce|ts";
12	ncSplice	exon	66614860	66614980	.	+	.	gene_id "ENSMMUG00000021152"; transcript_id "rmCircRNA-112"; exon_number "3" gene_name "FAM117B"; gene_biotype "protein_coding"; oId "lv:circFAM117B-1120-001|ce:circFAM117B-2597-001|ts:circFAM117B-1964-001"; tissue "lv|ce|ts";
12	ncSplice	gene	67321606	67329224	.	-	.	gene_id "ENSMMUG00000000314"; gene_name "RAPH1"; gene_source "ncSplice"; gene_biotype "protein_coding";
12	ncSplice	transcript	67321606	67329224	.	-	.	gene_id "ENSMMUG00000000314"; transcript_id "rmCircRNA-113"; gene_name "RAPH1"; gene_biotype "protein_coding"; transcript_biotype "circRNA"; oId "lv:circRAPH1-1134-001"; tissue "lv";
12	ncSplice	exon	67321606	67321716	.	-	.	gene_id "ENSMMUG00000000314"; transcript_id "rmCircRNA-113"; exon_number "1" gene_name "RAPH1"; gene_biotype "protein_coding"; oId "lv:circRAPH1-1134-001"; tissue "lv";
12	ncSplice	exon	67322605	67322748	.	-	.	gene_id "ENSMMUG00000000314"; transcript_id "rmCircRNA-113"; exon_number "2" gene_name "RAPH1"; gene_biotype "protein_coding"; oId "lv:circRAPH1-1134-001"; tissue "lv";
12	ncSplice	exon	67324697	67324762	.	-	.	gene_id "ENSMMUG00000000314"; transcript_id "rmCircRNA-113"; exon_number "3" gene_name "RAPH1"; gene_biotype "protein_coding"; oId "lv:circRAPH1-1134-001"; tissue "lv";
12	ncSplice	exon	67327209	67327330	.	-	.	gene_id "ENSMMUG00000000314"; transcript_id "rmCircRNA-113"; exon_number "4" gene_name "RAPH1"; gene_biotype "protein_coding"; oId "lv:circRAPH1-1134-001"; tissue "lv";
12	ncSplice	exon	67328546	67328705	.	-	.	gene_id "ENSMMUG00000000314"; transcript_id "rmCircRNA-113"; exon_number "5" gene_name "RAPH1"; gene_biotype "protein_coding"; oId "lv:circRAPH1-1134-001"; tissue "lv";
12	ncSplice	exon	67329147	67329224	.	-	.	gene_id "ENSMMUG00000000314"; transcript_id "rmCircRNA-113"; exon_number "6" gene_name "RAPH1"; gene_biotype "protein_coding"; oId "lv:circRAPH1-1134-001"; tissue "lv";
12	ncSplice	gene	67357392	67359108	.	-	.	gene_id "ENSMMUG00000000314"; gene_name "RAPH1"; gene_source "ncSplice"; gene_biotype "protein_coding";
12	ncSplice	transcript	67357392	67359108	.	-	.	gene_id "ENSMMUG00000000314"; transcript_id "rmCircRNA-114"; gene_name "RAPH1"; gene_biotype "protein_coding"; transcript_biotype "circRNA"; oId "lv:circRAPH1-1138-001|ce:circRAPH1-2640-001"; tissue "lv|ce";
12	ncSplice	exon	67357392	67357897	.	-	.	gene_id "ENSMMUG00000000314"; transcript_id "rmCircRNA-114"; exon_number "1" gene_name "RAPH1"; gene_biotype "protein_coding"; oId "lv:circRAPH1-1138-001|ce:circRAPH1-2640-001"; tissue "lv|ce";
12	ncSplice	exon	67359003	67359108	.	-	.	gene_id "ENSMMUG00000000314"; transcript_id "rmCircRNA-114"; exon_number "2" gene_name "RAPH1"; gene_biotype "protein_coding"; oId "lv:circRAPH1-1138-001|ce:circRAPH1-2640-001"; tissue "lv|ce";
12	ncSplice	gene	73879509	73924886	.	-	.	gene_id "ENSMMUG00000010515"; gene_name "KANSL1L"; gene_source "ncSplice"; gene_biotype "protein_coding";
12	ncSplice	transcript	73879509	73924886	.	-	.	gene_id "ENSMMUG00000010515"; transcript_id "rmCircRNA-115"; gene_name "KANSL1L"; gene_biotype "protein_coding"; transcript_biotype "circRNA"; oId "lv:circKANSL1L-1152-004|ce:circKANSL1L-2689-022"; tissue "lv|ce";
12	ncSplice	exon	73879509	73879630	.	-	.	gene_id "ENSMMUG00000010515"; transcript_id "rmCircRNA-115"; exon_number "1" gene_name "KANSL1L"; gene_biotype "protein_coding"; oId "lv:circKANSL1L-1152-004|ce:circKANSL1L-2689-022"; tissue "lv|ce";
12	ncSplice	exon	73884041	73884238	.	-	.	gene_id "ENSMMUG00000010515"; transcript_id "rmCircRNA-115"; exon_number "2" gene_name "KANSL1L"; gene_biotype "protein_coding"; oId "lv:circKANSL1L-1152-004|ce:circKANSL1L-2689-022"; tissue "lv|ce";
12	ncSplice	exon	73899158	73899299	.	-	.	gene_id "ENSMMUG00000010515"; transcript_id "rmCircRNA-115"; exon_number "3" gene_name "KANSL1L"; gene_biotype "protein_coding"; oId "lv:circKANSL1L-1152-004|ce:circKANSL1L-2689-022"; tissue "lv|ce";
12	ncSplice	exon	73923839	73924886	.	-	.	gene_id "ENSMMUG00000010515"; transcript_id "rmCircRNA-115"; exon_number "4" gene_name "KANSL1L"; gene_biotype "protein_coding"; oId "lv:circKANSL1L-1152-004|ce:circKANSL1L-2689-022"; tissue "lv|ce";
12	ncSplice	gene	74329321	74338689	.	+	.	gene_id "ENSMMUG00000010508"; gene_name "CPS1"; gene_source "ncSplice"; gene_biotype "protein_coding";
12	ncSplice	transcript	74329321	74338689	.	+	.	gene_id "ENSMMUG00000010508"; transcript_id "rmCircRNA-116"; gene_name "CPS1"; gene_biotype "protein_coding"; transcript_biotype "circRNA"; oId "lv:circCPS1-1158-001"; tissue "lv";
12	ncSplice	exon	74329321	74332474	.	+	.	gene_id "ENSMMUG00000010508"; transcript_id "rmCircRNA-116"; exon_number "1" gene_name "CPS1"; gene_biotype "protein_coding"; oId "lv:circCPS1-1158-001"; tissue "lv";
12	ncSplice	exon	74333164	74338689	.	+	.	gene_id "ENSMMUG00000010508"; transcript_id "rmCircRNA-116"; exon_number "2" gene_name "CPS1"; gene_biotype "protein_coding"; oId "lv:circCPS1-1158-001"; tissue "lv";
12	ncSplice	gene	74344026	74373811	.	+	.	gene_id "ENSMMUG00000010508"; gene_name "CPS1"; gene_source "ncSplice"; gene_biotype "protein_coding";
12	ncSplice	transcript	74344026	74373811	.	+	.	gene_id "ENSMMUG00000010508"; transcript_id "rmCircRNA-117"; gene_name "CPS1"; gene_biotype "protein_coding"; transcript_biotype "circRNA"; oId "lv:circCPS1-1161-001"; tissue "lv";
12	ncSplice	exon	74344026	74344115	.	+	.	gene_id "ENSMMUG00000010508"; transcript_id "rmCircRNA-117"; exon_number "1" gene_name "CPS1"; gene_biotype "protein_coding"; oId "lv:circCPS1-1161-001"; tissue "lv";
12	ncSplice	exon	74345432	74345807	.	+	.	gene_id "ENSMMUG00000010508"; transcript_id "rmCircRNA-117"; exon_number "2" gene_name "CPS1"; gene_biotype "protein_coding"; oId "lv:circCPS1-1161-001"; tissue "lv";
12	ncSplice	exon	74346144	74347926	.	+	.	gene_id "ENSMMUG00000010508"; transcript_id "rmCircRNA-117"; exon_number "3" gene_name "CPS1"; gene_biotype "protein_coding"; oId "lv:circCPS1-1161-001"; tissue "lv";
12	ncSplice	exon	74348828	74350550	.	+	.	gene_id "ENSMMUG00000010508"; transcript_id "rmCircRNA-117"; exon_number "4" gene_name "CPS1"; gene_biotype "protein_coding"; oId "lv:circCPS1-1161-001"; tissue "lv";
12	ncSplice	exon	74351388	74351483	.	+	.	gene_id "ENSMMUG00000010508"; transcript_id "rmCircRNA-117"; exon_number "5" gene_name "CPS1"; gene_biotype "protein_coding"; oId "lv:circCPS1-1161-001"; tissue "lv";
12	ncSplice	exon	74355301	74355490	.	+	.	gene_id "ENSMMUG00000010508"; transcript_id "rmCircRNA-117"; exon_number "6" gene_name "CPS1"; gene_biotype "protein_coding"; oId "lv:circCPS1-1161-001"; tissue "lv";
12	ncSplice	exon	74357217	74357374	.	+	.	gene_id "ENSMMUG00000010508"; transcript_id "rmCircRNA-117"; exon_number "7" gene_name "CPS1"; gene_biotype "protein_coding"; oId "lv:circCPS1-1161-001"; tissue "lv";
12	ncSplice	exon	74358926	74373811	.	+	.	gene_id "ENSMMUG00000010508"; transcript_id "rmCircRNA-117"; exon_number "8" gene_name "CPS1"; gene_biotype "protein_coding"; oId "lv:circCPS1-1161-001"; tissue "lv";
12	ncSplice	gene	74394401	74417354	.	+	.	gene_id "ENSMMUG00000010508"; gene_name "CPS1"; gene_source "ncSplice"; gene_biotype "protein_coding";
12	ncSplice	transcript	74394401	74417354	.	+	.	gene_id "ENSMMUG00000010508"; transcript_id "rmCircRNA-118"; gene_name "CPS1"; gene_biotype "protein_coding"; transcript_biotype "circRNA"; oId "lv:circCPS1-1163-004"; tissue "lv";
12	ncSplice	exon	74394401	74394542	.	+	.	gene_id "ENSMMUG00000010508"; transcript_id "rmCircRNA-118"; exon_number "1" gene_name "CPS1"; gene_biotype "protein_coding"; oId "lv:circCPS1-1163-004"; tissue "lv";
12	ncSplice	exon	74395850	74395915	.	+	.	gene_id "ENSMMUG00000010508"; transcript_id "rmCircRNA-118"; exon_number "2" gene_name "CPS1"; gene_biotype "protein_coding"; oId "lv:circCPS1-1163-004"; tissue "lv";
12	ncSplice	exon	74396372	74396435	.	+	.	gene_id "ENSMMUG00000010508"; transcript_id "rmCircRNA-118"; exon_number "3" gene_name "CPS1"; gene_biotype "protein_coding"; oId "lv:circCPS1-1163-004"; tissue "lv";
12	ncSplice	exon	74398844	74399025	.	+	.	gene_id "ENSMMUG00000010508"; transcript_id "rmCircRNA-118"; exon_number "4" gene_name "CPS1"; gene_biotype "protein_coding"; oId "lv:circCPS1-1163-004"; tissue "lv";
12	ncSplice	exon	74402504	74402698	.	+	.	gene_id "ENSMMUG00000010508"; transcript_id "rmCircRNA-118"; exon_number "5" gene_name "CPS1"; gene_biotype "protein_coding"; oId "lv:circCPS1-1163-004"; tissue "lv";
12	ncSplice	exon	74403111	74403178	.	+	.	gene_id "ENSMMUG00000010508"; transcript_id "rmCircRNA-118"; exon_number "6" gene_name "CPS1"; gene_biotype "protein_coding"; oId "lv:circCPS1-1163-004"; tissue "lv";
12	ncSplice	exon	74405013	74405088	.	+	.	gene_id "ENSMMUG00000010508"; transcript_id "rmCircRNA-118"; exon_number "7" gene_name "CPS1"; gene_biotype "protein_coding"; oId "lv:circCPS1-1163-004"; tissue "lv";
12	ncSplice	exon	74408608	74408685	.	+	.	gene_id "ENSMMUG00000010508"; transcript_id "rmCircRNA-118"; exon_number "8" gene_name "CPS1"; gene_biotype "protein_coding"; oId "lv:circCPS1-1163-004"; tissue "lv";
12	ncSplice	exon	74411103	74411210	.	+	.	gene_id "ENSMMUG00000010508"; transcript_id "rmCircRNA-118"; exon_number "9" gene_name "CPS1"; gene_biotype "protein_coding"; oId "lv:circCPS1-1163-004"; tissue "lv";
12	ncSplice	exon	74412859	74412948	.	+	.	gene_id "ENSMMUG00000010508"; transcript_id "rmCircRNA-118"; exon_number "10" gene_name "CPS1"; gene_biotype "protein_coding"; oId "lv:circCPS1-1163-004"; tissue "lv";
12	ncSplice	exon	74414720	74414890	.	+	.	gene_id "ENSMMUG00000010508"; transcript_id "rmCircRNA-118"; exon_number "11" gene_name "CPS1"; gene_biotype "protein_coding"; oId "lv:circCPS1-1163-004"; tissue "lv";
12	ncSplice	exon	74417280	74417354	.	+	.	gene_id "ENSMMUG00000010508"; transcript_id "rmCircRNA-118"; exon_number "12" gene_name "CPS1"; gene_biotype "protein_coding"; oId "lv:circCPS1-1163-004"; tissue "lv";
12	ncSplice	gene	74394401	74420397	.	+	.	gene_id "ENSMMUG00000010508"; gene_name "CPS1"; gene_source "ncSplice"; gene_biotype "protein_coding";
12	ncSplice	transcript	74394401	74420397	.	+	.	gene_id "ENSMMUG00000010508"; transcript_id "rmCircRNA-119"; gene_name "CPS1"; gene_biotype "protein_coding"; transcript_biotype "circRNA"; oId "lv:circCPS1-1164-004"; tissue "lv";
12	ncSplice	exon	74394401	74394542	.	+	.	gene_id "ENSMMUG00000010508"; transcript_id "rmCircRNA-119"; exon_number "1" gene_name "CPS1"; gene_biotype "protein_coding"; oId "lv:circCPS1-1164-004"; tissue "lv";
12	ncSplice	exon	74395850	74395915	.	+	.	gene_id "ENSMMUG00000010508"; transcript_id "rmCircRNA-119"; exon_number "2" gene_name "CPS1"; gene_biotype "protein_coding"; oId "lv:circCPS1-1164-004"; tissue "lv";
12	ncSplice	exon	74396372	74396435	.	+	.	gene_id "ENSMMUG00000010508"; transcript_id "rmCircRNA-119"; exon_number "3" gene_name "CPS1"; gene_biotype "protein_coding"; oId "lv:circCPS1-1164-004"; tissue "lv";
12	ncSplice	exon	74398844	74399025	.	+	.	gene_id "ENSMMUG00000010508"; transcript_id "rmCircRNA-119"; exon_number "4" gene_name "CPS1"; gene_biotype "protein_coding"; oId "lv:circCPS1-1164-004"; tissue "lv";
12	ncSplice	exon	74402504	74402698	.	+	.	gene_id "ENSMMUG00000010508"; transcript_id "rmCircRNA-119"; exon_number "5" gene_name "CPS1"; gene_biotype "protein_coding"; oId "lv:circCPS1-1164-004"; tissue "lv";
12	ncSplice	exon	74403111	74403178	.	+	.	gene_id "ENSMMUG00000010508"; transcript_id "rmCircRNA-119"; exon_number "6" gene_name "CPS1"; gene_biotype "protein_coding"; oId "lv:circCPS1-1164-004"; tissue "lv";
12	ncSplice	exon	74405013	74405088	.	+	.	gene_id "ENSMMUG00000010508"; transcript_id "rmCircRNA-119"; exon_number "7" gene_name "CPS1"; gene_biotype "protein_coding"; oId "lv:circCPS1-1164-004"; tissue "lv";
12	ncSplice	exon	74408608	74408685	.	+	.	gene_id "ENSMMUG00000010508"; transcript_id "rmCircRNA-119"; exon_number "8" gene_name "CPS1"; gene_biotype "protein_coding"; oId "lv:circCPS1-1164-004"; tissue "lv";
12	ncSplice	exon	74411103	74411210	.	+	.	gene_id "ENSMMUG00000010508"; transcript_id "rmCircRNA-119"; exon_number "9" gene_name "CPS1"; gene_biotype "protein_coding"; oId "lv:circCPS1-1164-004"; tissue "lv";
12	ncSplice	exon	74412859	74412948	.	+	.	gene_id "ENSMMUG00000010508"; transcript_id "rmCircRNA-119"; exon_number "10" gene_name "CPS1"; gene_biotype "protein_coding"; oId "lv:circCPS1-1164-004"; tissue "lv";
12	ncSplice	exon	74414720	74414890	.	+	.	gene_id "ENSMMUG00000010508"; transcript_id "rmCircRNA-119"; exon_number "11" gene_name "CPS1"; gene_biotype "protein_coding"; oId "lv:circCPS1-1164-004"; tissue "lv";
12	ncSplice	exon	74417280	74417354	.	+	.	gene_id "ENSMMUG00000010508"; transcript_id "rmCircRNA-119"; exon_number "12" gene_name "CPS1"; gene_biotype "protein_coding"; oId "lv:circCPS1-1164-004"; tissue "lv";
12	ncSplice	exon	74420299	74420397	.	+	.	gene_id "ENSMMUG00000010508"; transcript_id "rmCircRNA-119"; exon_number "13" gene_name "CPS1"; gene_biotype "protein_coding"; oId "lv:circCPS1-1164-004"; tissue "lv";
12	ncSplice	gene	74398844	74420397	.	+	.	gene_id "ENSMMUG00000010508"; gene_name "CPS1"; gene_source "ncSplice"; gene_biotype "protein_coding";
12	ncSplice	transcript	74398844	74420397	.	+	.	gene_id "ENSMMUG00000010508"; transcript_id "rmCircRNA-120"; gene_name "CPS1"; gene_biotype "protein_coding"; transcript_biotype "circRNA"; oId "lv:circCPS1-1167-004"; tissue "lv";
12	ncSplice	exon	74398844	74399025	.	+	.	gene_id "ENSMMUG00000010508"; transcript_id "rmCircRNA-120"; exon_number "1" gene_name "CPS1"; gene_biotype "protein_coding"; oId "lv:circCPS1-1167-004"; tissue "lv";
12	ncSplice	exon	74402504	74402698	.	+	.	gene_id "ENSMMUG00000010508"; transcript_id "rmCircRNA-120"; exon_number "2" gene_name "CPS1"; gene_biotype "protein_coding"; oId "lv:circCPS1-1167-004"; tissue "lv";
12	ncSplice	exon	74403111	74403178	.	+	.	gene_id "ENSMMUG00000010508"; transcript_id "rmCircRNA-120"; exon_number "3" gene_name "CPS1"; gene_biotype "protein_coding"; oId "lv:circCPS1-1167-004"; tissue "lv";
12	ncSplice	exon	74405013	74405088	.	+	.	gene_id "ENSMMUG00000010508"; transcript_id "rmCircRNA-120"; exon_number "4" gene_name "CPS1"; gene_biotype "protein_coding"; oId "lv:circCPS1-1167-004"; tissue "lv";
12	ncSplice	exon	74408608	74408685	.	+	.	gene_id "ENSMMUG00000010508"; transcript_id "rmCircRNA-120"; exon_number "5" gene_name "CPS1"; gene_biotype "protein_coding"; oId "lv:circCPS1-1167-004"; tissue "lv";
12	ncSplice	exon	74411103	74411210	.	+	.	gene_id "ENSMMUG00000010508"; transcript_id "rmCircRNA-120"; exon_number "6" gene_name "CPS1"; gene_biotype "protein_coding"; oId "lv:circCPS1-1167-004"; tissue "lv";
12	ncSplice	exon	74412859	74412948	.	+	.	gene_id "ENSMMUG00000010508"; transcript_id "rmCircRNA-120"; exon_number "7" gene_name "CPS1"; gene_biotype "protein_coding"; oId "lv:circCPS1-1167-004"; tissue "lv";
12	ncSplice	exon	74414720	74414890	.	+	.	gene_id "ENSMMUG00000010508"; transcript_id "rmCircRNA-120"; exon_number "8" gene_name "CPS1"; gene_biotype "protein_coding"; oId "lv:circCPS1-1167-004"; tissue "lv";
12	ncSplice	exon	74417280	74417354	.	+	.	gene_id "ENSMMUG00000010508"; transcript_id "rmCircRNA-120"; exon_number "9" gene_name "CPS1"; gene_biotype "protein_coding"; oId "lv:circCPS1-1167-004"; tissue "lv";
12	ncSplice	exon	74420299	74420397	.	+	.	gene_id "ENSMMUG00000010508"; transcript_id "rmCircRNA-120"; exon_number "10" gene_name "CPS1"; gene_biotype "protein_coding"; oId "lv:circCPS1-1167-004"; tissue "lv";
12	ncSplice	gene	79858085	79868476	.	-	.	gene_id "ENSMMUG00000017964"; gene_name "PECR"; gene_source "ncSplice"; gene_biotype "protein_coding";
12	ncSplice	transcript	79858085	79868476	.	-	.	gene_id "ENSMMUG00000017964"; transcript_id "rmCircRNA-121"; gene_name "PECR"; gene_biotype "protein_coding"; transcript_biotype "circRNA"; oId "lv:circPECR-1177-006"; tissue "lv";
12	ncSplice	exon	79858085	79858254	.	-	.	gene_id "ENSMMUG00000017964"; transcript_id "rmCircRNA-121"; exon_number "1" gene_name "PECR"; gene_biotype "protein_coding"; oId "lv:circPECR-1177-006"; tissue "lv";
12	ncSplice	exon	79862565	79862676	.	-	.	gene_id "ENSMMUG00000017964"; transcript_id "rmCircRNA-121"; exon_number "2" gene_name "PECR"; gene_biotype "protein_coding"; oId "lv:circPECR-1177-006"; tissue "lv";
12	ncSplice	exon	79868366	79868476	.	-	.	gene_id "ENSMMUG00000017964"; transcript_id "rmCircRNA-121"; exon_number "3" gene_name "PECR"; gene_biotype "protein_coding"; oId "lv:circPECR-1177-006"; tissue "lv";
12	ncSplice	gene	79862565	79884516	.	-	.	gene_id "ENSMMUG00000017964"; gene_name "PECR"; gene_source "ncSplice"; gene_biotype "protein_coding";
12	ncSplice	transcript	79862565	79884516	.	-	.	gene_id "ENSMMUG00000017964"; transcript_id "rmCircRNA-122"; gene_name "PECR"; gene_biotype "protein_coding"; transcript_biotype "circRNA"; oId "lv:circPECR-1180-011"; tissue "lv";
12	ncSplice	exon	79862565	79862676	.	-	.	gene_id "ENSMMUG00000017964"; transcript_id "rmCircRNA-122"; exon_number "1" gene_name "PECR"; gene_biotype "protein_coding"; oId "lv:circPECR-1180-011"; tissue "lv";
12	ncSplice	exon	79868366	79868476	.	-	.	gene_id "ENSMMUG00000017964"; transcript_id "rmCircRNA-122"; exon_number "2" gene_name "PECR"; gene_biotype "protein_coding"; oId "lv:circPECR-1180-011"; tissue "lv";
12	ncSplice	exon	79870548	79870644	.	-	.	gene_id "ENSMMUG00000017964"; transcript_id "rmCircRNA-122"; exon_number "3" gene_name "PECR"; gene_biotype "protein_coding"; oId "lv:circPECR-1180-011"; tissue "lv";
12	ncSplice	exon	79877151	79877232	.	-	.	gene_id "ENSMMUG00000017964"; transcript_id "rmCircRNA-122"; exon_number "4" gene_name "PECR"; gene_biotype "protein_coding"; oId "lv:circPECR-1180-011"; tissue "lv";
12	ncSplice	exon	79883307	79883472	.	-	.	gene_id "ENSMMUG00000017964"; transcript_id "rmCircRNA-122"; exon_number "5" gene_name "PECR"; gene_biotype "protein_coding"; oId "lv:circPECR-1180-011"; tissue "lv";
12	ncSplice	exon	79884383	79884516	.	-	.	gene_id "ENSMMUG00000017964"; transcript_id "rmCircRNA-122"; exon_number "6" gene_name "PECR"; gene_biotype "protein_coding"; oId "lv:circPECR-1180-011"; tissue "lv";
12	ncSplice	gene	90754593	90757353	.	+	.	gene_id "ENSMMUG00000000722"; gene_name "RHBDD1"; gene_source "ncSplice"; gene_biotype "protein_coding";
12	ncSplice	transcript	90754593	90757353	.	+	.	gene_id "ENSMMUG00000000722"; transcript_id "rmCircRNA-123"; gene_name "RHBDD1"; gene_biotype "protein_coding"; transcript_biotype "circRNA"; oId "lv:circRHBDD1-1194-002|ce:circRHBDD1-2745-002|ts:circRHBDD1-2099-002"; tissue "lv|ce|ts";
12	ncSplice	exon	90754593	90755115	.	+	.	gene_id "ENSMMUG00000000722"; transcript_id "rmCircRNA-123"; exon_number "1" gene_name "RHBDD1"; gene_biotype "protein_coding"; oId "lv:circRHBDD1-1194-002|ce:circRHBDD1-2745-002|ts:circRHBDD1-2099-002"; tissue "lv|ce|ts";
12	ncSplice	exon	90757221	90757353	.	+	.	gene_id "ENSMMUG00000000722"; transcript_id "rmCircRNA-123"; exon_number "2" gene_name "RHBDD1"; gene_biotype "protein_coding"; oId "lv:circRHBDD1-1194-002|ce:circRHBDD1-2745-002|ts:circRHBDD1-2099-002"; tissue "lv|ce|ts";
12	ncSplice	gene	90754593	90803440	.	+	.	gene_id "ENSMMUG00000000722"; gene_name "RHBDD1"; gene_source "ncSplice"; gene_biotype "protein_coding";
12	ncSplice	transcript	90754593	90803440	.	+	.	gene_id "ENSMMUG00000000722"; transcript_id "rmCircRNA-124"; gene_name "RHBDD1"; gene_biotype "protein_coding"; transcript_biotype "circRNA"; oId "lv:circRHBDD1-1195-069|ce:circRHBDD1-2746-054|ts:circRHBDD1-2100-042"; tissue "lv|ce|ts";
12	ncSplice	exon	90754593	90755115	.	+	.	gene_id "ENSMMUG00000000722"; transcript_id "rmCircRNA-124"; exon_number "1" gene_name "RHBDD1"; gene_biotype "protein_coding"; oId "lv:circRHBDD1-1195-069|ce:circRHBDD1-2746-054|ts:circRHBDD1-2100-042"; tissue "lv|ce|ts";
12	ncSplice	exon	90757221	90757353	.	+	.	gene_id "ENSMMUG00000000722"; transcript_id "rmCircRNA-124"; exon_number "2" gene_name "RHBDD1"; gene_biotype "protein_coding"; oId "lv:circRHBDD1-1195-069|ce:circRHBDD1-2746-054|ts:circRHBDD1-2100-042"; tissue "lv|ce|ts";
12	ncSplice	exon	90795888	90795976	.	+	.	gene_id "ENSMMUG00000000722"; transcript_id "rmCircRNA-124"; exon_number "3" gene_name "RHBDD1"; gene_biotype "protein_coding"; oId "lv:circRHBDD1-1195-069|ce:circRHBDD1-2746-054|ts:circRHBDD1-2100-042"; tissue "lv|ce|ts";
12	ncSplice	exon	90797894	90797950	.	+	.	gene_id "ENSMMUG00000000722"; transcript_id "rmCircRNA-124"; exon_number "4" gene_name "RHBDD1"; gene_biotype "protein_coding"; oId "lv:circRHBDD1-1195-069|ce:circRHBDD1-2746-054|ts:circRHBDD1-2100-042"; tissue "lv|ce|ts";
12	ncSplice	exon	90803297	90803440	.	+	.	gene_id "ENSMMUG00000000722"; transcript_id "rmCircRNA-124"; exon_number "5" gene_name "RHBDD1"; gene_biotype "protein_coding"; oId "lv:circRHBDD1-1195-069|ce:circRHBDD1-2746-054|ts:circRHBDD1-2100-042"; tissue "lv|ce|ts";
12	ncSplice	gene	93706830	93750695	.	-	.	gene_id "ENSMMUG00000015842"; gene_name "TRIP12"; gene_source "ncSplice"; gene_biotype "protein_coding";
12	ncSplice	transcript	93706830	93750695	.	-	.	gene_id "ENSMMUG00000015842"; transcript_id "rmCircRNA-125"; gene_name "TRIP12"; gene_biotype "protein_coding"; transcript_biotype "circRNA"; oId "lv:circTRIP12-1210-001|ce:circTRIP12-2761-001"; tissue "lv|ce";
12	ncSplice	exon	93706830	93706966	.	-	.	gene_id "ENSMMUG00000015842"; transcript_id "rmCircRNA-125"; exon_number "1" gene_name "TRIP12"; gene_biotype "protein_coding"; oId "lv:circTRIP12-1210-001|ce:circTRIP12-2761-001"; tissue "lv|ce";
12	ncSplice	exon	93710315	93710420	.	-	.	gene_id "ENSMMUG00000015842"; transcript_id "rmCircRNA-125"; exon_number "2" gene_name "TRIP12"; gene_biotype "protein_coding"; oId "lv:circTRIP12-1210-001|ce:circTRIP12-2761-001"; tissue "lv|ce";
12	ncSplice	exon	93729244	93729303	.	-	.	gene_id "ENSMMUG00000015842"; transcript_id "rmCircRNA-125"; exon_number "3" gene_name "TRIP12"; gene_biotype "protein_coding"; oId "lv:circTRIP12-1210-001|ce:circTRIP12-2761-001"; tissue "lv|ce";
12	ncSplice	exon	93729391	93730046	.	-	.	gene_id "ENSMMUG00000015842"; transcript_id "rmCircRNA-125"; exon_number "4" gene_name "TRIP12"; gene_biotype "protein_coding"; oId "lv:circTRIP12-1210-001|ce:circTRIP12-2761-001"; tissue "lv|ce";
12	ncSplice	exon	93730877	93731002	.	-	.	gene_id "ENSMMUG00000015842"; transcript_id "rmCircRNA-125"; exon_number "5" gene_name "TRIP12"; gene_biotype "protein_coding"; oId "lv:circTRIP12-1210-001|ce:circTRIP12-2761-001"; tissue "lv|ce";
12	ncSplice	exon	93750549	93750695	.	-	.	gene_id "ENSMMUG00000015842"; transcript_id "rmCircRNA-125"; exon_number "6" gene_name "TRIP12"; gene_biotype "protein_coding"; oId "lv:circTRIP12-1210-001|ce:circTRIP12-2761-001"; tissue "lv|ce";
12	ncSplice	gene	93729244	93750695	.	-	.	gene_id "ENSMMUG00000015842"; gene_name "TRIP12"; gene_source "ncSplice"; gene_biotype "protein_coding";
12	ncSplice	transcript	93729244	93750695	.	-	.	gene_id "ENSMMUG00000015842"; transcript_id "rmCircRNA-126"; gene_name "TRIP12"; gene_biotype "protein_coding"; transcript_biotype "circRNA"; oId "lv:circTRIP12-1213-001|ce:circTRIP12-2764-001"; tissue "lv|ce";
12	ncSplice	exon	93729244	93729303	.	-	.	gene_id "ENSMMUG00000015842"; transcript_id "rmCircRNA-126"; exon_number "1" gene_name "TRIP12"; gene_biotype "protein_coding"; oId "lv:circTRIP12-1213-001|ce:circTRIP12-2764-001"; tissue "lv|ce";
12	ncSplice	exon	93729391	93730046	.	-	.	gene_id "ENSMMUG00000015842"; transcript_id "rmCircRNA-126"; exon_number "2" gene_name "TRIP12"; gene_biotype "protein_coding"; oId "lv:circTRIP12-1213-001|ce:circTRIP12-2764-001"; tissue "lv|ce";
12	ncSplice	exon	93730877	93731002	.	-	.	gene_id "ENSMMUG00000015842"; transcript_id "rmCircRNA-126"; exon_number "3" gene_name "TRIP12"; gene_biotype "protein_coding"; oId "lv:circTRIP12-1213-001|ce:circTRIP12-2764-001"; tissue "lv|ce";
12	ncSplice	exon	93750549	93750695	.	-	.	gene_id "ENSMMUG00000015842"; transcript_id "rmCircRNA-126"; exon_number "4" gene_name "TRIP12"; gene_biotype "protein_coding"; oId "lv:circTRIP12-1213-001|ce:circTRIP12-2764-001"; tissue "lv|ce";
12	ncSplice	gene	96677532	96686618	.	+	.	gene_id "ENSMMUG00000012211"; gene_name "GIGYF2"; gene_source "ncSplice"; gene_biotype "protein_coding";
12	ncSplice	transcript	96677532	96686618	.	+	.	gene_id "ENSMMUG00000012211"; transcript_id "rmCircRNA-127"; gene_name "GIGYF2"; gene_biotype "protein_coding"; transcript_biotype "circRNA"; oId "lv:circGIGYF2-1226-001|ce:circGIGYF2-2793-002|ts:circGIGYF2-2163-001"; tissue "lv|ce|ts";
12	ncSplice	exon	96677532	96677711	.	+	.	gene_id "ENSMMUG00000012211"; transcript_id "rmCircRNA-127"; exon_number "1" gene_name "GIGYF2"; gene_biotype "protein_coding"; oId "lv:circGIGYF2-1226-001|ce:circGIGYF2-2793-002|ts:circGIGYF2-2163-001"; tissue "lv|ce|ts";
12	ncSplice	exon	96681074	96681291	.	+	.	gene_id "ENSMMUG00000012211"; transcript_id "rmCircRNA-127"; exon_number "2" gene_name "GIGYF2"; gene_biotype "protein_coding"; oId "lv:circGIGYF2-1226-001|ce:circGIGYF2-2793-002|ts:circGIGYF2-2163-001"; tissue "lv|ce|ts";
12	ncSplice	exon	96681387	96681549	.	+	.	gene_id "ENSMMUG00000012211"; transcript_id "rmCircRNA-127"; exon_number "3" gene_name "GIGYF2"; gene_biotype "protein_coding"; oId "lv:circGIGYF2-1226-001|ce:circGIGYF2-2793-002|ts:circGIGYF2-2163-001"; tissue "lv|ce|ts";
12	ncSplice	exon	96681637	96681825	.	+	.	gene_id "ENSMMUG00000012211"; transcript_id "rmCircRNA-127"; exon_number "4" gene_name "GIGYF2"; gene_biotype "protein_coding"; oId "lv:circGIGYF2-1226-001|ce:circGIGYF2-2793-002|ts:circGIGYF2-2163-001"; tissue "lv|ce|ts";
12	ncSplice	exon	96685145	96685341	.	+	.	gene_id "ENSMMUG00000012211"; transcript_id "rmCircRNA-127"; exon_number "5" gene_name "GIGYF2"; gene_biotype "protein_coding"; oId "lv:circGIGYF2-1226-001|ce:circGIGYF2-2793-002|ts:circGIGYF2-2163-001"; tissue "lv|ce|ts";
12	ncSplice	exon	96686459	96686618	.	+	.	gene_id "ENSMMUG00000012211"; transcript_id "rmCircRNA-127"; exon_number "6" gene_name "GIGYF2"; gene_biotype "protein_coding"; oId "lv:circGIGYF2-1226-001|ce:circGIGYF2-2793-002|ts:circGIGYF2-2163-001"; tissue "lv|ce|ts";
12	ncSplice	gene	97486958	97488094	.	+	.	gene_id "12:97486957:97488094:1"; gene_name "12:97486957:97488094:1"; gene_source "ncSplice"; gene_biotype "novel";
12	ncSplice	transcript	97486958	97488094	.	+	.	gene_id "12:97486957:97488094:1"; transcript_id "rmCircRNA-128"; gene_name "12:97486957:97488094:1"; gene_biotype "novel"; transcript_biotype "circRNA"; oId "lv:circ12:97486957:97488094:1-1234-001|ce:circ12:97486957:97488094:1-2800-001|ts:circ12:97486957:97488094:1-2166-001"; tissue "lv|ce|ts";
12	ncSplice	exon	97486958	97487020	.	+	.	gene_id "12:97486957:97488094:1"; transcript_id "rmCircRNA-128"; exon_number "1" gene_name "12:97486957:97488094:1"; gene_biotype "novel"; oId "lv:circ12:97486957:97488094:1-1234-001|ce:circ12:97486957:97488094:1-2800-001|ts:circ12:97486957:97488094:1-2166-001"; tissue "lv|ce|ts";
12	ncSplice	exon	97487126	97488094	.	+	.	gene_id "12:97486957:97488094:1"; transcript_id "rmCircRNA-128"; exon_number "2" gene_name "12:97486957:97488094:1"; gene_biotype "novel"; oId "lv:circ12:97486957:97488094:1-1234-001|ce:circ12:97486957:97488094:1-2800-001|ts:circ12:97486957:97488094:1-2166-001"; tissue "lv|ce|ts";
13	ncSplice	gene	108164267	108166012	.	+	.	gene_id "ENSMMUG00000023779"; gene_name "SULT1C4"; gene_source "ncSplice"; gene_biotype "protein_coding";
13	ncSplice	transcript	108164267	108166012	.	+	.	gene_id "ENSMMUG00000023779"; transcript_id "rmCircRNA-129"; gene_name "SULT1C4"; gene_biotype "protein_coding"; transcript_biotype "circRNA"; oId "lv:circSULT1C4-1252-001"; tissue "lv";
13	ncSplice	exon	108164267	108164392	.	+	.	gene_id "ENSMMUG00000023779"; transcript_id "rmCircRNA-129"; exon_number "1" gene_name "SULT1C4"; gene_biotype "protein_coding"; oId "lv:circSULT1C4-1252-001"; tissue "lv";
13	ncSplice	exon	108164887	108164984	.	+	.	gene_id "ENSMMUG00000023779"; transcript_id "rmCircRNA-129"; exon_number "2" gene_name "SULT1C4"; gene_biotype "protein_coding"; oId "lv:circSULT1C4-1252-001"; tissue "lv";
13	ncSplice	exon	108165600	108165726	.	+	.	gene_id "ENSMMUG00000023779"; transcript_id "rmCircRNA-129"; exon_number "3" gene_name "SULT1C4"; gene_biotype "protein_coding"; oId "lv:circSULT1C4-1252-001"; tissue "lv";
13	ncSplice	exon	108165918	108166012	.	+	.	gene_id "ENSMMUG00000023779"; transcript_id "rmCircRNA-129"; exon_number "4" gene_name "SULT1C4"; gene_biotype "protein_coding"; oId "lv:circSULT1C4-1252-001"; tissue "lv";
13	ncSplice	gene	10885804	10887273	.	-	.	gene_id "ENSMMUG00000012864"; gene_name "PDIA6"; gene_source "ncSplice"; gene_biotype "protein_coding";
13	ncSplice	transcript	10885804	10887273	.	-	.	gene_id "ENSMMUG00000012864"; transcript_id "rmCircRNA-130"; gene_name "PDIA6"; gene_biotype "protein_coding"; transcript_biotype "circRNA"; oId "lv:circPDIA6-1258-001|ce:circPDIA6-2849-001"; tissue "lv|ce";
13	ncSplice	exon	10885804	10885934	.	-	.	gene_id "ENSMMUG00000012864"; transcript_id "rmCircRNA-130"; exon_number "1" gene_name "PDIA6"; gene_biotype "protein_coding"; oId "lv:circPDIA6-1258-001|ce:circPDIA6-2849-001"; tissue "lv|ce";
13	ncSplice	exon	10887167	10887273	.	-	.	gene_id "ENSMMUG00000012864"; transcript_id "rmCircRNA-130"; exon_number "2" gene_name "PDIA6"; gene_biotype "protein_coding"; oId "lv:circPDIA6-1258-001|ce:circPDIA6-2849-001"; tissue "lv|ce";
13	ncSplice	gene	109399275	109437668	.	-	.	gene_id "ENSMMUG00000017177"; gene_name "SEPT10"; gene_source "ncSplice"; gene_biotype "protein_coding";
13	ncSplice	transcript	109399275	109437668	.	-	.	gene_id "ENSMMUG00000017177"; transcript_id "rmCircRNA-131"; gene_name "SEPT10"; gene_biotype "protein_coding"; transcript_biotype "circRNA"; oId "lv:circSEPT10-1259-005"; tissue "lv";
13	ncSplice	exon	109399275	109399407	.	-	.	gene_id "ENSMMUG00000017177"; transcript_id "rmCircRNA-131"; exon_number "1" gene_name "SEPT10"; gene_biotype "protein_coding"; oId "lv:circSEPT10-1259-005"; tissue "lv";
13	ncSplice	exon	109412391	109412559	.	-	.	gene_id "ENSMMUG00000017177"; transcript_id "rmCircRNA-131"; exon_number "2" gene_name "SEPT10"; gene_biotype "protein_coding"; oId "lv:circSEPT10-1259-005"; tissue "lv";
13	ncSplice	exon	109413772	109413868	.	-	.	gene_id "ENSMMUG00000017177"; transcript_id "rmCircRNA-131"; exon_number "3" gene_name "SEPT10"; gene_biotype "protein_coding"; oId "lv:circSEPT10-1259-005"; tissue "lv";
13	ncSplice	exon	109415962	109416123	.	-	.	gene_id "ENSMMUG00000017177"; transcript_id "rmCircRNA-131"; exon_number "4" gene_name "SEPT10"; gene_biotype "protein_coding"; oId "lv:circSEPT10-1259-005"; tissue "lv";
13	ncSplice	exon	109423567	109423753	.	-	.	gene_id "ENSMMUG00000017177"; transcript_id "rmCircRNA-131"; exon_number "5" gene_name "SEPT10"; gene_biotype "protein_coding"; oId "lv:circSEPT10-1259-005"; tissue "lv";
13	ncSplice	exon	109429489	109429684	.	-	.	gene_id "ENSMMUG00000017177"; transcript_id "rmCircRNA-131"; exon_number "6" gene_name "SEPT10"; gene_biotype "protein_coding"; oId "lv:circSEPT10-1259-005"; tissue "lv";
13	ncSplice	exon	109430084	109430201	.	-	.	gene_id "ENSMMUG00000017177"; transcript_id "rmCircRNA-131"; exon_number "7" gene_name "SEPT10"; gene_biotype "protein_coding"; oId "lv:circSEPT10-1259-005"; tissue "lv";
13	ncSplice	exon	109437600	109437668	.	-	.	gene_id "ENSMMUG00000017177"; transcript_id "rmCircRNA-131"; exon_number "8" gene_name "SEPT10"; gene_biotype "protein_coding"; oId "lv:circSEPT10-1259-005"; tissue "lv";
13	ncSplice	gene	109412391	109437668	.	-	.	gene_id "ENSMMUG00000017177"; gene_name "SEPT10"; gene_source "ncSplice"; gene_biotype "protein_coding";
13	ncSplice	transcript	109412391	109437668	.	-	.	gene_id "ENSMMUG00000017177"; transcript_id "rmCircRNA-132"; gene_name "SEPT10"; gene_biotype "protein_coding"; transcript_biotype "circRNA"; oId "lv:circSEPT10-1260-005|ts:circSEPT10-2210-034"; tissue "lv|ts";
13	ncSplice	exon	109412391	109412559	.	-	.	gene_id "ENSMMUG00000017177"; transcript_id "rmCircRNA-132"; exon_number "1" gene_name "SEPT10"; gene_biotype "protein_coding"; oId "lv:circSEPT10-1260-005|ts:circSEPT10-2210-034"; tissue "lv|ts";
13	ncSplice	exon	109413772	109413868	.	-	.	gene_id "ENSMMUG00000017177"; transcript_id "rmCircRNA-132"; exon_number "2" gene_name "SEPT10"; gene_biotype "protein_coding"; oId "lv:circSEPT10-1260-005|ts:circSEPT10-2210-034"; tissue "lv|ts";
13	ncSplice	exon	109415962	109416123	.	-	.	gene_id "ENSMMUG00000017177"; transcript_id "rmCircRNA-132"; exon_number "3" gene_name "SEPT10"; gene_biotype "protein_coding"; oId "lv:circSEPT10-1260-005|ts:circSEPT10-2210-034"; tissue "lv|ts";
13	ncSplice	exon	109423567	109423753	.	-	.	gene_id "ENSMMUG00000017177"; transcript_id "rmCircRNA-132"; exon_number "4" gene_name "SEPT10"; gene_biotype "protein_coding"; oId "lv:circSEPT10-1260-005|ts:circSEPT10-2210-034"; tissue "lv|ts";
13	ncSplice	exon	109429489	109429684	.	-	.	gene_id "ENSMMUG00000017177"; transcript_id "rmCircRNA-132"; exon_number "5" gene_name "SEPT10"; gene_biotype "protein_coding"; oId "lv:circSEPT10-1260-005|ts:circSEPT10-2210-034"; tissue "lv|ts";
13	ncSplice	exon	109430084	109430201	.	-	.	gene_id "ENSMMUG00000017177"; transcript_id "rmCircRNA-132"; exon_number "6" gene_name "SEPT10"; gene_biotype "protein_coding"; oId "lv:circSEPT10-1260-005|ts:circSEPT10-2210-034"; tissue "lv|ts";
13	ncSplice	exon	109437600	109437668	.	-	.	gene_id "ENSMMUG00000017177"; transcript_id "rmCircRNA-132"; exon_number "7" gene_name "SEPT10"; gene_biotype "protein_coding"; oId "lv:circSEPT10-1260-005|ts:circSEPT10-2210-034"; tissue "lv|ts";
13	ncSplice	gene	116497375	116502319	.	-	.	gene_id "ENSMMUG00000009844"; gene_name "R3HDM1"; gene_source "ncSplice"; gene_biotype "protein_coding";
13	ncSplice	transcript	116497375	116502319	.	-	.	gene_id "ENSMMUG00000009844"; transcript_id "rmCircRNA-133"; gene_name "R3HDM1"; gene_biotype "protein_coding"; transcript_biotype "circRNA"; oId "lv:circR3HDM1-1272-001|ce:circR3HDM1-2883-001|ts:circR3HDM1-2244-001"; tissue "lv|ce|ts";
13	ncSplice	exon	116497375	116497526	.	-	.	gene_id "ENSMMUG00000009844"; transcript_id "rmCircRNA-133"; exon_number "1" gene_name "R3HDM1"; gene_biotype "protein_coding"; oId "lv:circR3HDM1-1272-001|ce:circR3HDM1-2883-001|ts:circR3HDM1-2244-001"; tissue "lv|ce|ts";
13	ncSplice	exon	116502165	116502319	.	-	.	gene_id "ENSMMUG00000009844"; transcript_id "rmCircRNA-133"; exon_number "2" gene_name "R3HDM1"; gene_biotype "protein_coding"; oId "lv:circR3HDM1-1272-001|ce:circR3HDM1-2883-001|ts:circR3HDM1-2244-001"; tissue "lv|ce|ts";
1	ncSplice	gene	31183917	31187134	.	+	.	gene_id "ENSMMUG00000019216"; gene_name "PHACTR4"; gene_source "ncSplice"; gene_biotype "protein_coding";
1	ncSplice	transcript	31183917	31187134	.	+	.	gene_id "ENSMMUG00000019216"; transcript_id "rmCircRNA-134"; gene_name "PHACTR4"; gene_biotype "protein_coding"; transcript_biotype "circRNA"; oId "lv:circPHACTR4-1284-001|ts:circPHACTR4-2255-001"; tissue "lv|ts";
1	ncSplice	exon	31183917	31184514	.	+	.	gene_id "ENSMMUG00000019216"; transcript_id "rmCircRNA-134"; exon_number "1" gene_name "PHACTR4"; gene_biotype "protein_coding"; oId "lv:circPHACTR4-1284-001|ts:circPHACTR4-2255-001"; tissue "lv|ts";
1	ncSplice	exon	31186950	31187134	.	+	.	gene_id "ENSMMUG00000019216"; transcript_id "rmCircRNA-134"; exon_number "2" gene_name "PHACTR4"; gene_biotype "protein_coding"; oId "lv:circPHACTR4-1284-001|ts:circPHACTR4-2255-001"; tissue "lv|ts";
1	ncSplice	gene	31183917	31190933	.	+	.	gene_id "ENSMMUG00000019216"; gene_name "PHACTR4"; gene_source "ncSplice"; gene_biotype "protein_coding";
1	ncSplice	transcript	31183917	31190933	.	+	.	gene_id "ENSMMUG00000019216"; transcript_id "rmCircRNA-135"; gene_name "PHACTR4"; gene_biotype "protein_coding"; transcript_biotype "circRNA"; oId "lv:circPHACTR4-1285-001|ce:circPHACTR4-2901-001"; tissue "lv|ce";
1	ncSplice	exon	31183917	31184514	.	+	.	gene_id "ENSMMUG00000019216"; transcript_id "rmCircRNA-135"; exon_number "1" gene_name "PHACTR4"; gene_biotype "protein_coding"; oId "lv:circPHACTR4-1285-001|ce:circPHACTR4-2901-001"; tissue "lv|ce";
1	ncSplice	exon	31186950	31187134	.	+	.	gene_id "ENSMMUG00000019216"; transcript_id "rmCircRNA-135"; exon_number "2" gene_name "PHACTR4"; gene_biotype "protein_coding"; oId "lv:circPHACTR4-1285-001|ce:circPHACTR4-2901-001"; tissue "lv|ce";
1	ncSplice	exon	31190780	31190933	.	+	.	gene_id "ENSMMUG00000019216"; transcript_id "rmCircRNA-135"; exon_number "3" gene_name "PHACTR4"; gene_biotype "protein_coding"; oId "lv:circPHACTR4-1285-001|ce:circPHACTR4-2901-001"; tissue "lv|ce";
13	ncSplice	gene	126332046	126393123	.	+	.	gene_id "ENSMMUG00000001244"; gene_name "EPB41L5"; gene_source "ncSplice"; gene_biotype "protein_coding";
13	ncSplice	transcript	126332046	126393123	.	+	.	gene_id "ENSMMUG00000001244"; transcript_id "rmCircRNA-136"; gene_name "EPB41L5"; gene_biotype "protein_coding"; transcript_biotype "circRNA"; oId "lv:circEPB41L5-1303-011|ce:circEPB41L5-2943-005"; tissue "lv|ce";
13	ncSplice	exon	126332046	126352680	.	+	.	gene_id "ENSMMUG00000001244"; transcript_id "rmCircRNA-136"; exon_number "1" gene_name "EPB41L5"; gene_biotype "protein_coding"; oId "lv:circEPB41L5-1303-011|ce:circEPB41L5-2943-005"; tissue "lv|ce";
13	ncSplice	exon	126359555	126359683	.	+	.	gene_id "ENSMMUG00000001244"; transcript_id "rmCircRNA-136"; exon_number "2" gene_name "EPB41L5"; gene_biotype "protein_coding"; oId "lv:circEPB41L5-1303-011|ce:circEPB41L5-2943-005"; tissue "lv|ce";
13	ncSplice	exon	126362786	126362850	.	+	.	gene_id "ENSMMUG00000001244"; transcript_id "rmCircRNA-136"; exon_number "3" gene_name "EPB41L5"; gene_biotype "protein_coding"; oId "lv:circEPB41L5-1303-011|ce:circEPB41L5-2943-005"; tissue "lv|ce";
13	ncSplice	exon	126378236	126378329	.	+	.	gene_id "ENSMMUG00000001244"; transcript_id "rmCircRNA-136"; exon_number "4" gene_name "EPB41L5"; gene_biotype "protein_coding"; oId "lv:circEPB41L5-1303-011|ce:circEPB41L5-2943-005"; tissue "lv|ce";
13	ncSplice	exon	126382254	126382328	.	+	.	gene_id "ENSMMUG00000001244"; transcript_id "rmCircRNA-136"; exon_number "5" gene_name "EPB41L5"; gene_biotype "protein_coding"; oId "lv:circEPB41L5-1303-011|ce:circEPB41L5-2943-005"; tissue "lv|ce";
13	ncSplice	exon	126384889	126384930	.	+	.	gene_id "ENSMMUG00000001244"; transcript_id "rmCircRNA-136"; exon_number "6" gene_name "EPB41L5"; gene_biotype "protein_coding"; oId "lv:circEPB41L5-1303-011|ce:circEPB41L5-2943-005"; tissue "lv|ce";
13	ncSplice	exon	126385291	126385421	.	+	.	gene_id "ENSMMUG00000001244"; transcript_id "rmCircRNA-136"; exon_number "7" gene_name "EPB41L5"; gene_biotype "protein_coding"; oId "lv:circEPB41L5-1303-011|ce:circEPB41L5-2943-005"; tissue "lv|ce";
13	ncSplice	exon	126392962	126393123	.	+	.	gene_id "ENSMMUG00000001244"; transcript_id "rmCircRNA-136"; exon_number "8" gene_name "EPB41L5"; gene_biotype "protein_coding"; oId "lv:circEPB41L5-1303-011|ce:circEPB41L5-2943-005"; tissue "lv|ce";
1	ncSplice	gene	31838017	31839806	.	+	.	gene_id "ENSMMUG00000011377"; gene_name "EPB41"; gene_source "ncSplice"; gene_biotype "protein_coding";
1	ncSplice	transcript	31838017	31839806	.	+	.	gene_id "ENSMMUG00000011377"; transcript_id "rmCircRNA-137"; gene_name "EPB41"; gene_biotype "protein_coding"; transcript_biotype "circRNA"; oId "lv:circEPB41-1332-001|ce:circEPB41-2998-001"; tissue "lv|ce";
1	ncSplice	exon	31838017	31838466	.	+	.	gene_id "ENSMMUG00000011377"; transcript_id "rmCircRNA-137"; exon_number "1" gene_name "EPB41"; gene_biotype "protein_coding"; oId "lv:circEPB41-1332-001|ce:circEPB41-2998-001"; tissue "lv|ce";
1	ncSplice	exon	31839678	31839806	.	+	.	gene_id "ENSMMUG00000011377"; transcript_id "rmCircRNA-137"; exon_number "2" gene_name "EPB41"; gene_biotype "protein_coding"; oId "lv:circEPB41-1332-001|ce:circEPB41-2998-001"; tissue "lv|ce";
13	ncSplice	gene	20960222	20969142	.	-	.	gene_id "ENSMMUG00000007692"; gene_name "APOB"; gene_source "ncSplice"; gene_biotype "protein_coding";
13	ncSplice	transcript	20960222	20969142	.	-	.	gene_id "ENSMMUG00000007692"; transcript_id "rmCircRNA-138"; gene_name "APOB"; gene_biotype "protein_coding"; transcript_biotype "circRNA"; oId "lv:circAPOB-1342-001"; tissue "lv";
13	ncSplice	exon	20960222	20960682	.	-	.	gene_id "ENSMMUG00000007692"; transcript_id "rmCircRNA-138"; exon_number "1" gene_name "APOB"; gene_biotype "protein_coding"; oId "lv:circAPOB-1342-001"; tissue "lv";
13	ncSplice	exon	20960865	20961826	.	-	.	gene_id "ENSMMUG00000007692"; transcript_id "rmCircRNA-138"; exon_number "2" gene_name "APOB"; gene_biotype "protein_coding"; oId "lv:circAPOB-1342-001"; tissue "lv";
13	ncSplice	exon	20962546	20964184	.	-	.	gene_id "ENSMMUG00000007692"; transcript_id "rmCircRNA-138"; exon_number "3" gene_name "APOB"; gene_biotype "protein_coding"; oId "lv:circAPOB-1342-001"; tissue "lv";
13	ncSplice	exon	20964914	20965051	.	-	.	gene_id "ENSMMUG00000007692"; transcript_id "rmCircRNA-138"; exon_number "4" gene_name "APOB"; gene_biotype "protein_coding"; oId "lv:circAPOB-1342-001"; tissue "lv";
13	ncSplice	exon	20967837	20969142	.	-	.	gene_id "ENSMMUG00000007692"; transcript_id "rmCircRNA-138"; exon_number "5" gene_name "APOB"; gene_biotype "protein_coding"; oId "lv:circAPOB-1342-001"; tissue "lv";
13	ncSplice	gene	24055684	24066940	.	+	.	gene_id "ENSMMUG00000009406"; gene_name "NA"; gene_source "ncSplice"; gene_biotype "protein_coding";
13	ncSplice	transcript	24055684	24066940	.	+	.	gene_id "ENSMMUG00000009406"; transcript_id "rmCircRNA-139"; gene_name "NA"; gene_biotype "protein_coding"; transcript_biotype "circRNA"; oId "lv:circNA-1353-001|ce:circNA-3028-007|ts:circNA-2370-004"; tissue "lv|ce|ts";
13	ncSplice	exon	24055684	24055752	.	+	.	gene_id "ENSMMUG00000009406"; transcript_id "rmCircRNA-139"; exon_number "1" gene_name "NA"; gene_biotype "protein_coding"; oId "lv:circNA-1353-001|ce:circNA-3028-007|ts:circNA-2370-004"; tissue "lv|ce|ts";
13	ncSplice	exon	24058479	24058670	.	+	.	gene_id "ENSMMUG00000009406"; transcript_id "rmCircRNA-139"; exon_number "2" gene_name "NA"; gene_biotype "protein_coding"; oId "lv:circNA-1353-001|ce:circNA-3028-007|ts:circNA-2370-004"; tissue "lv|ce|ts";
13	ncSplice	exon	24060022	24060102	.	+	.	gene_id "ENSMMUG00000009406"; transcript_id "rmCircRNA-139"; exon_number "3" gene_name "NA"; gene_biotype "protein_coding"; oId "lv:circNA-1353-001|ce:circNA-3028-007|ts:circNA-2370-004"; tissue "lv|ce|ts";
13	ncSplice	exon	24066602	24066689	.	+	.	gene_id "ENSMMUG00000009406"; transcript_id "rmCircRNA-139"; exon_number "4" gene_name "NA"; gene_biotype "protein_coding"; oId "lv:circNA-1353-001|ce:circNA-3028-007|ts:circNA-2370-004"; tissue "lv|ce|ts";
13	ncSplice	exon	24066784	24066940	.	+	.	gene_id "ENSMMUG00000009406"; transcript_id "rmCircRNA-139"; exon_number "5" gene_name "NA"; gene_biotype "protein_coding"; oId "lv:circNA-1353-001|ce:circNA-3028-007|ts:circNA-2370-004"; tissue "lv|ce|ts";
13	ncSplice	gene	24476310	24484447	.	+	.	gene_id "13:24476309:24484447:1"; gene_name "13:24476309:24484447:1"; gene_source "ncSplice"; gene_biotype "novel";
13	ncSplice	transcript	24476310	24484447	.	+	.	gene_id "13:24476309:24484447:1"; transcript_id "rmCircRNA-140"; gene_name "13:24476309:24484447:1"; gene_biotype "novel"; transcript_biotype "circRNA"; oId "lv:circ13:24476309:24484447:1-1355-003|ce:circ13:24476309:24484447:1-3038-002"; tissue "lv|ce";
13	ncSplice	exon	24476310	24476445	.	+	.	gene_id "13:24476309:24484447:1"; transcript_id "rmCircRNA-140"; exon_number "1" gene_name "13:24476309:24484447:1"; gene_biotype "novel"; oId "lv:circ13:24476309:24484447:1-1355-003|ce:circ13:24476309:24484447:1-3038-002"; tissue "lv|ce";
13	ncSplice	exon	24483869	24483990	.	+	.	gene_id "13:24476309:24484447:1"; transcript_id "rmCircRNA-140"; exon_number "2" gene_name "13:24476309:24484447:1"; gene_biotype "novel"; oId "lv:circ13:24476309:24484447:1-1355-003|ce:circ13:24476309:24484447:1-3038-002"; tissue "lv|ce";
13	ncSplice	exon	24484381	24484447	.	+	.	gene_id "13:24476309:24484447:1"; transcript_id "rmCircRNA-140"; exon_number "3" gene_name "13:24476309:24484447:1"; gene_biotype "novel"; oId "lv:circ13:24476309:24484447:1-1355-003|ce:circ13:24476309:24484447:1-3038-002"; tissue "lv|ce";
13	ncSplice	gene	24476310	24496997	.	+	.	gene_id "13:24476309:24496997:1"; gene_name "13:24476309:24496997:1"; gene_source "ncSplice"; gene_biotype "novel";
13	ncSplice	transcript	24476310	24496997	.	+	.	gene_id "13:24476309:24496997:1"; transcript_id "rmCircRNA-141"; gene_name "13:24476309:24496997:1"; gene_biotype "novel"; transcript_biotype "circRNA"; oId "lv:circ13:24476309:24496997:1-1356-005|ce:circ13:24476309:24496997:1-3039-006|ts:circ13:24476309:24496997:1-2376-004"; tissue "lv|ce|ts";
13	ncSplice	exon	24476310	24476445	.	+	.	gene_id "13:24476309:24496997:1"; transcript_id "rmCircRNA-141"; exon_number "1" gene_name "13:24476309:24496997:1"; gene_biotype "novel"; oId "lv:circ13:24476309:24496997:1-1356-005|ce:circ13:24476309:24496997:1-3039-006|ts:circ13:24476309:24496997:1-2376-004"; tissue "lv|ce|ts";
13	ncSplice	exon	24496913	24496997	.	+	.	gene_id "13:24476309:24496997:1"; transcript_id "rmCircRNA-141"; exon_number "2" gene_name "13:24476309:24496997:1"; gene_biotype "novel"; oId "lv:circ13:24476309:24496997:1-1356-005|ce:circ13:24476309:24496997:1-3039-006|ts:circ13:24476309:24496997:1-2376-004"; tissue "lv|ce|ts";
13	ncSplice	gene	29117753	29176914	.	+	.	gene_id "ENSMMUG00000010259"; gene_name "CLIP4"; gene_source "ncSplice"; gene_biotype "protein_coding";
13	ncSplice	transcript	29117753	29176914	.	+	.	gene_id "ENSMMUG00000010259"; transcript_id "rmCircRNA-142"; gene_name "CLIP4"; gene_biotype "protein_coding"; transcript_biotype "circRNA"; oId "lv:circCLIP4-1369-009"; tissue "lv";
13	ncSplice	exon	29117753	29117900	.	+	.	gene_id "ENSMMUG00000010259"; transcript_id "rmCircRNA-142"; exon_number "1" gene_name "CLIP4"; gene_biotype "protein_coding"; oId "lv:circCLIP4-1369-009"; tissue "lv";
13	ncSplice	exon	29127324	29127463	.	+	.	gene_id "ENSMMUG00000010259"; transcript_id "rmCircRNA-142"; exon_number "2" gene_name "CLIP4"; gene_biotype "protein_coding"; oId "lv:circCLIP4-1369-009"; tissue "lv";
13	ncSplice	exon	29128373	29128466	.	+	.	gene_id "ENSMMUG00000010259"; transcript_id "rmCircRNA-142"; exon_number "3" gene_name "CLIP4"; gene_biotype "protein_coding"; oId "lv:circCLIP4-1369-009"; tissue "lv";
13	ncSplice	exon	29129862	29130023	.	+	.	gene_id "ENSMMUG00000010259"; transcript_id "rmCircRNA-142"; exon_number "4" gene_name "CLIP4"; gene_biotype "protein_coding"; oId "lv:circCLIP4-1369-009"; tissue "lv";
13	ncSplice	exon	29131762	29131880	.	+	.	gene_id "ENSMMUG00000010259"; transcript_id "rmCircRNA-142"; exon_number "5" gene_name "CLIP4"; gene_biotype "protein_coding"; oId "lv:circCLIP4-1369-009"; tissue "lv";
13	ncSplice	exon	29139231	29139467	.	+	.	gene_id "ENSMMUG00000010259"; transcript_id "rmCircRNA-142"; exon_number "6" gene_name "CLIP4"; gene_biotype "protein_coding"; oId "lv:circCLIP4-1369-009"; tissue "lv";
13	ncSplice	exon	29140720	29140855	.	+	.	gene_id "ENSMMUG00000010259"; transcript_id "rmCircRNA-142"; exon_number "7" gene_name "CLIP4"; gene_biotype "protein_coding"; oId "lv:circCLIP4-1369-009"; tissue "lv";
13	ncSplice	exon	29148011	29148154	.	+	.	gene_id "ENSMMUG00000010259"; transcript_id "rmCircRNA-142"; exon_number "8" gene_name "CLIP4"; gene_biotype "protein_coding"; oId "lv:circCLIP4-1369-009"; tissue "lv";
13	ncSplice	exon	29151727	29151816	.	+	.	gene_id "ENSMMUG00000010259"; transcript_id "rmCircRNA-142"; exon_number "9" gene_name "CLIP4"; gene_biotype "protein_coding"; oId "lv:circCLIP4-1369-009"; tissue "lv";
13	ncSplice	exon	29152590	29152733	.	+	.	gene_id "ENSMMUG00000010259"; transcript_id "rmCircRNA-142"; exon_number "10" gene_name "CLIP4"; gene_biotype "protein_coding"; oId "lv:circCLIP4-1369-009"; tissue "lv";
13	ncSplice	exon	29155682	29155816	.	+	.	gene_id "ENSMMUG00000010259"; transcript_id "rmCircRNA-142"; exon_number "11" gene_name "CLIP4"; gene_biotype "protein_coding"; oId "lv:circCLIP4-1369-009"; tissue "lv";
13	ncSplice	exon	29159216	29159339	.	+	.	gene_id "ENSMMUG00000010259"; transcript_id "rmCircRNA-142"; exon_number "12" gene_name "CLIP4"; gene_biotype "protein_coding"; oId "lv:circCLIP4-1369-009"; tissue "lv";
13	ncSplice	exon	29169291	29169363	.	+	.	gene_id "ENSMMUG00000010259"; transcript_id "rmCircRNA-142"; exon_number "13" gene_name "CLIP4"; gene_biotype "protein_coding"; oId "lv:circCLIP4-1369-009"; tissue "lv";
13	ncSplice	exon	29176789	29176914	.	+	.	gene_id "ENSMMUG00000010259"; transcript_id "rmCircRNA-142"; exon_number "14" gene_name "CLIP4"; gene_biotype "protein_coding"; oId "lv:circCLIP4-1369-009"; tissue "lv";
13	ncSplice	gene	31955805	31982042	.	-	.	gene_id "ENSMMUG00000003908"; gene_name "MEMO1"; gene_source "ncSplice"; gene_biotype "protein_coding";
13	ncSplice	transcript	31955805	31982042	.	-	.	gene_id "ENSMMUG00000003908"; transcript_id "rmCircRNA-143"; gene_name "MEMO1"; gene_biotype "protein_coding"; transcript_biotype "circRNA"; oId "lv:circMEMO1-1375-001|ce:circMEMO1-3114-002|ts:circMEMO1-2436-002"; tissue "lv|ce|ts";
13	ncSplice	exon	31955805	31955916	.	-	.	gene_id "ENSMMUG00000003908"; transcript_id "rmCircRNA-143"; exon_number "1" gene_name "MEMO1"; gene_biotype "protein_coding"; oId "lv:circMEMO1-1375-001|ce:circMEMO1-3114-002|ts:circMEMO1-2436-002"; tissue "lv|ce|ts";
13	ncSplice	exon	31958554	31958666	.	-	.	gene_id "ENSMMUG00000003908"; transcript_id "rmCircRNA-143"; exon_number "2" gene_name "MEMO1"; gene_biotype "protein_coding"; oId "lv:circMEMO1-1375-001|ce:circMEMO1-3114-002|ts:circMEMO1-2436-002"; tissue "lv|ce|ts";
13	ncSplice	exon	31970277	31970345	.	-	.	gene_id "ENSMMUG00000003908"; transcript_id "rmCircRNA-143"; exon_number "3" gene_name "MEMO1"; gene_biotype "protein_coding"; oId "lv:circMEMO1-1375-001|ce:circMEMO1-3114-002|ts:circMEMO1-2436-002"; tissue "lv|ce|ts";
13	ncSplice	exon	31981961	31982042	.	-	.	gene_id "ENSMMUG00000003908"; transcript_id "rmCircRNA-143"; exon_number "4" gene_name "MEMO1"; gene_biotype "protein_coding"; oId "lv:circMEMO1-1375-001|ce:circMEMO1-3114-002|ts:circMEMO1-2436-002"; tissue "lv|ce|ts";
1	ncSplice	gene	33760379	33763248	.	-	.	gene_id "ENSMMUG00000013520"; gene_name "PUM1"; gene_source "ncSplice"; gene_biotype "protein_coding";
1	ncSplice	transcript	33760379	33763248	.	-	.	gene_id "ENSMMUG00000013520"; transcript_id "rmCircRNA-144"; gene_name "PUM1"; gene_biotype "protein_coding"; transcript_biotype "circRNA"; oId "lv:circPUM1-1413-002|ce:circPUM1-3189-001|ts:circPUM1-2482-002"; tissue "lv|ce|ts";
1	ncSplice	exon	33760379	33760649	.	-	.	gene_id "ENSMMUG00000013520"; transcript_id "rmCircRNA-144"; exon_number "1" gene_name "PUM1"; gene_biotype "protein_coding"; oId "lv:circPUM1-1413-002|ce:circPUM1-3189-001|ts:circPUM1-2482-002"; tissue "lv|ce|ts";
1	ncSplice	exon	33763082	33763248	.	-	.	gene_id "ENSMMUG00000013520"; transcript_id "rmCircRNA-144"; exon_number "2" gene_name "PUM1"; gene_biotype "protein_coding"; oId "lv:circPUM1-1413-002|ce:circPUM1-3189-001|ts:circPUM1-2482-002"; tissue "lv|ce|ts";
13	ncSplice	gene	45540331	45546160	.	-	.	gene_id "ENSMMUG00000003490"; gene_name "SRBD1"; gene_source "ncSplice"; gene_biotype "protein_coding";
13	ncSplice	transcript	45540331	45546160	.	-	.	gene_id "ENSMMUG00000003490"; transcript_id "rmCircRNA-145"; gene_name "SRBD1"; gene_biotype "protein_coding"; transcript_biotype "circRNA"; oId "lv:circSRBD1-1442-001|ts:circSRBD1-2541-002"; tissue "lv|ts";
13	ncSplice	exon	45540331	45540510	.	-	.	gene_id "ENSMMUG00000003490"; transcript_id "rmCircRNA-145"; exon_number "1" gene_name "SRBD1"; gene_biotype "protein_coding"; oId "lv:circSRBD1-1442-001|ts:circSRBD1-2541-002"; tissue "lv|ts";
13	ncSplice	exon	45544643	45544819	.	-	.	gene_id "ENSMMUG00000003490"; transcript_id "rmCircRNA-145"; exon_number "2" gene_name "SRBD1"; gene_biotype "protein_coding"; oId "lv:circSRBD1-1442-001|ts:circSRBD1-2541-002"; tissue "lv|ts";
13	ncSplice	exon	45546054	45546160	.	-	.	gene_id "ENSMMUG00000003490"; transcript_id "rmCircRNA-145"; exon_number "3" gene_name "SRBD1"; gene_biotype "protein_coding"; oId "lv:circSRBD1-1442-001|ts:circSRBD1-2541-002"; tissue "lv|ts";
13	ncSplice	gene	48550419	48552759	.	+	.	gene_id "ENSMMUG00000020677"; gene_name "FOXN2"; gene_source "ncSplice"; gene_biotype "protein_coding";
13	ncSplice	transcript	48550419	48552759	.	+	.	gene_id "ENSMMUG00000020677"; transcript_id "rmCircRNA-146"; gene_name "FOXN2"; gene_biotype "protein_coding"; transcript_biotype "circRNA"; oId "lv:circFOXN2-1450-001|ce:circFOXN2-3276-001"; tissue "lv|ce";
13	ncSplice	exon	48550419	48550487	.	+	.	gene_id "ENSMMUG00000020677"; transcript_id "rmCircRNA-146"; exon_number "1" gene_name "FOXN2"; gene_biotype "protein_coding"; oId "lv:circFOXN2-1450-001|ce:circFOXN2-3276-001"; tissue "lv|ce";
13	ncSplice	exon	48552012	48552759	.	+	.	gene_id "ENSMMUG00000020677"; transcript_id "rmCircRNA-146"; exon_number "2" gene_name "FOXN2"; gene_biotype "protein_coding"; oId "lv:circFOXN2-1450-001|ce:circFOXN2-3276-001"; tissue "lv|ce";
13	ncSplice	gene	58437749	58447822	.	-	.	gene_id "ENSMMUG00000002026"; gene_name "FANCL"; gene_source "ncSplice"; gene_biotype "protein_coding";
13	ncSplice	transcript	58437749	58447822	.	-	.	gene_id "ENSMMUG00000002026"; transcript_id "rmCircRNA-147"; gene_name "FANCL"; gene_biotype "protein_coding"; transcript_biotype "circRNA"; oId "lv:circFANCL-1473-002|ts:circFANCL-2612-002"; tissue "lv|ts";
13	ncSplice	exon	58437749	58437877	.	-	.	gene_id "ENSMMUG00000002026"; transcript_id "rmCircRNA-147"; exon_number "1" gene_name "FANCL"; gene_biotype "protein_coding"; oId "lv:circFANCL-1473-002|ts:circFANCL-2612-002"; tissue "lv|ts";
13	ncSplice	exon	58442420	58442476	.	-	.	gene_id "ENSMMUG00000002026"; transcript_id "rmCircRNA-147"; exon_number "2" gene_name "FANCL"; gene_biotype "protein_coding"; oId "lv:circFANCL-1473-002|ts:circFANCL-2612-002"; tissue "lv|ts";
13	ncSplice	exon	58445533	58445593	.	-	.	gene_id "ENSMMUG00000002026"; transcript_id "rmCircRNA-147"; exon_number "3" gene_name "FANCL"; gene_biotype "protein_coding"; oId "lv:circFANCL-1473-002|ts:circFANCL-2612-002"; tissue "lv|ts";
13	ncSplice	exon	58447764	58447822	.	-	.	gene_id "ENSMMUG00000002026"; transcript_id "rmCircRNA-147"; exon_number "4" gene_name "FANCL"; gene_biotype "protein_coding"; oId "lv:circFANCL-1473-002|ts:circFANCL-2612-002"; tissue "lv|ts";
13	ncSplice	gene	65572317	65583237	.	-	.	gene_id "ENSMMUG00000006012"; gene_name "SPRED2"; gene_source "ncSplice"; gene_biotype "protein_coding";
13	ncSplice	transcript	65572317	65583237	.	-	.	gene_id "ENSMMUG00000006012"; transcript_id "rmCircRNA-148"; gene_name "SPRED2"; gene_biotype "protein_coding"; transcript_biotype "circRNA"; oId "lv:circSPRED2-1494-003|ce:circSPRED2-3388-002"; tissue "lv|ce";
13	ncSplice	exon	65572317	65572381	.	-	.	gene_id "ENSMMUG00000006012"; transcript_id "rmCircRNA-148"; exon_number "1" gene_name "SPRED2"; gene_biotype "protein_coding"; oId "lv:circSPRED2-1494-003|ce:circSPRED2-3388-002"; tissue "lv|ce";
13	ncSplice	exon	65574939	65575107	.	-	.	gene_id "ENSMMUG00000006012"; transcript_id "rmCircRNA-148"; exon_number "2" gene_name "SPRED2"; gene_biotype "protein_coding"; oId "lv:circSPRED2-1494-003|ce:circSPRED2-3388-002"; tissue "lv|ce";
13	ncSplice	exon	65583060	65583237	.	-	.	gene_id "ENSMMUG00000006012"; transcript_id "rmCircRNA-148"; exon_number "3" gene_name "SPRED2"; gene_biotype "protein_coding"; oId "lv:circSPRED2-1494-003|ce:circSPRED2-3388-002"; tissue "lv|ce";
1	ncSplice	gene	37986773	37987165	.	-	.	gene_id "ENSMMUG00000019154"; gene_name "SFPQ"; gene_source "ncSplice"; gene_biotype "protein_coding";
1	ncSplice	transcript	37986773	37987165	.	-	.	gene_id "ENSMMUG00000019154"; transcript_id "rmCircRNA-149"; gene_name "SFPQ"; gene_biotype "protein_coding"; transcript_biotype "circRNA"; oId "lv:circSFPQ-1514-001"; tissue "lv";
1	ncSplice	exon	37986773	37986857	.	-	.	gene_id "ENSMMUG00000019154"; transcript_id "rmCircRNA-149"; exon_number "1" gene_name "SFPQ"; gene_biotype "protein_coding"; oId "lv:circSFPQ-1514-001"; tissue "lv";
1	ncSplice	exon	37986969	37987165	.	-	.	gene_id "ENSMMUG00000019154"; transcript_id "rmCircRNA-149"; exon_number "2" gene_name "SFPQ"; gene_biotype "protein_coding"; oId "lv:circSFPQ-1514-001"; tissue "lv";
1	ncSplice	gene	38167478	38170326	.	+	.	gene_id "ENSMMUG00000019793"; gene_name "ZMYM4"; gene_source "ncSplice"; gene_biotype "protein_coding";
1	ncSplice	transcript	38167478	38170326	.	+	.	gene_id "ENSMMUG00000019793"; transcript_id "rmCircRNA-150"; gene_name "ZMYM4"; gene_biotype "protein_coding"; transcript_biotype "circRNA"; oId "lv:circZMYM4-1515-002|ce:circZMYM4-3459-002"; tissue "lv|ce";
1	ncSplice	exon	38167478	38167999	.	+	.	gene_id "ENSMMUG00000019793"; transcript_id "rmCircRNA-150"; exon_number "1" gene_name "ZMYM4"; gene_biotype "protein_coding"; oId "lv:circZMYM4-1515-002|ce:circZMYM4-3459-002"; tissue "lv|ce";
1	ncSplice	exon	38169740	38169801	.	+	.	gene_id "ENSMMUG00000019793"; transcript_id "rmCircRNA-150"; exon_number "2" gene_name "ZMYM4"; gene_biotype "protein_coding"; oId "lv:circZMYM4-1515-002|ce:circZMYM4-3459-002"; tissue "lv|ce";
1	ncSplice	exon	38170156	38170326	.	+	.	gene_id "ENSMMUG00000019793"; transcript_id "rmCircRNA-150"; exon_number "3" gene_name "ZMYM4"; gene_biotype "protein_coding"; oId "lv:circZMYM4-1515-002|ce:circZMYM4-3459-002"; tissue "lv|ce";
13	ncSplice	gene	86442141	86444617	.	-	.	gene_id "ENSMMUG00000019559"; gene_name "ST3GAL5"; gene_source "ncSplice"; gene_biotype "protein_coding";
13	ncSplice	transcript	86442141	86444617	.	-	.	gene_id "ENSMMUG00000019559"; transcript_id "rmCircRNA-151"; gene_name "ST3GAL5"; gene_biotype "protein_coding"; transcript_biotype "circRNA"; oId "lv:circST3GAL5-1525-001|ce:circST3GAL5-3476-001"; tissue "lv|ce";
13	ncSplice	exon	86442141	86442252	.	-	.	gene_id "ENSMMUG00000019559"; transcript_id "rmCircRNA-151"; exon_number "1" gene_name "ST3GAL5"; gene_biotype "protein_coding"; oId "lv:circST3GAL5-1525-001|ce:circST3GAL5-3476-001"; tissue "lv|ce";
13	ncSplice	exon	86444494	86444617	.	-	.	gene_id "ENSMMUG00000019559"; transcript_id "rmCircRNA-151"; exon_number "2" gene_name "ST3GAL5"; gene_biotype "protein_coding"; oId "lv:circST3GAL5-1525-001|ce:circST3GAL5-3476-001"; tissue "lv|ce";
13	ncSplice	gene	86442141	86449297	.	-	.	gene_id "ENSMMUG00000019559"; gene_name "ST3GAL5"; gene_source "ncSplice"; gene_biotype "protein_coding";
13	ncSplice	transcript	86442141	86449297	.	-	.	gene_id "ENSMMUG00000019559"; transcript_id "rmCircRNA-152"; gene_name "ST3GAL5"; gene_biotype "protein_coding"; transcript_biotype "circRNA"; oId "lv:circST3GAL5-1526-001"; tissue "lv";
13	ncSplice	exon	86442141	86442252	.	-	.	gene_id "ENSMMUG00000019559"; transcript_id "rmCircRNA-152"; exon_number "1" gene_name "ST3GAL5"; gene_biotype "protein_coding"; oId "lv:circST3GAL5-1526-001"; tissue "lv";
13	ncSplice	exon	86444494	86444617	.	-	.	gene_id "ENSMMUG00000019559"; transcript_id "rmCircRNA-152"; exon_number "2" gene_name "ST3GAL5"; gene_biotype "protein_coding"; oId "lv:circST3GAL5-1526-001"; tissue "lv";
13	ncSplice	exon	86448970	86449297	.	-	.	gene_id "ENSMMUG00000019559"; transcript_id "rmCircRNA-152"; exon_number "3" gene_name "ST3GAL5"; gene_biotype "protein_coding"; oId "lv:circST3GAL5-1526-001"; tissue "lv";
13	ncSplice	gene	99386325	99408563	.	-	.	gene_id "ENSMMUG00000015515"; gene_name "NA"; gene_source "ncSplice"; gene_biotype "protein_coding";
13	ncSplice	transcript	99386325	99408563	.	-	.	gene_id "ENSMMUG00000015515"; transcript_id "rmCircRNA-153"; gene_name "NA"; gene_biotype "protein_coding"; transcript_biotype "circRNA"; oId "lv:circNA-1555-001"; tissue "lv";
13	ncSplice	exon	99386325	99386477	.	-	.	gene_id "ENSMMUG00000015515"; transcript_id "rmCircRNA-153"; exon_number "1" gene_name "NA"; gene_biotype "protein_coding"; oId "lv:circNA-1555-001"; tissue "lv";
13	ncSplice	exon	99393373	99393541	.	-	.	gene_id "ENSMMUG00000015515"; transcript_id "rmCircRNA-153"; exon_number "2" gene_name "NA"; gene_biotype "protein_coding"; oId "lv:circNA-1555-001"; tissue "lv";
13	ncSplice	exon	99405727	99405853	.	-	.	gene_id "ENSMMUG00000015515"; transcript_id "rmCircRNA-153"; exon_number "3" gene_name "NA"; gene_biotype "protein_coding"; oId "lv:circNA-1555-001"; tissue "lv";
13	ncSplice	exon	99408500	99408563	.	-	.	gene_id "ENSMMUG00000015515"; transcript_id "rmCircRNA-153"; exon_number "4" gene_name "NA"; gene_biotype "protein_coding"; oId "lv:circNA-1555-001"; tissue "lv";
13	ncSplice	gene	99393373	99408563	.	-	.	gene_id "ENSMMUG00000015515"; gene_name "NA"; gene_source "ncSplice"; gene_biotype "protein_coding";
13	ncSplice	transcript	99393373	99408563	.	-	.	gene_id "ENSMMUG00000015515"; transcript_id "rmCircRNA-154"; gene_name "NA"; gene_biotype "protein_coding"; transcript_biotype "circRNA"; oId "lv:circNA-1556-001"; tissue "lv";
13	ncSplice	exon	99393373	99393541	.	-	.	gene_id "ENSMMUG00000015515"; transcript_id "rmCircRNA-154"; exon_number "1" gene_name "NA"; gene_biotype "protein_coding"; oId "lv:circNA-1556-001"; tissue "lv";
13	ncSplice	exon	99405727	99405853	.	-	.	gene_id "ENSMMUG00000015515"; transcript_id "rmCircRNA-154"; exon_number "2" gene_name "NA"; gene_biotype "protein_coding"; oId "lv:circNA-1556-001"; tissue "lv";
13	ncSplice	exon	99408500	99408563	.	-	.	gene_id "ENSMMUG00000015515"; transcript_id "rmCircRNA-154"; exon_number "3" gene_name "NA"; gene_biotype "protein_coding"; oId "lv:circNA-1556-001"; tissue "lv";
14	ncSplice	gene	105985082	106010258	.	-	.	gene_id "ENSMMUG00000013724"; gene_name "CWF19L2"; gene_source "ncSplice"; gene_biotype "protein_coding";
14	ncSplice	transcript	105985082	106010258	.	-	.	gene_id "ENSMMUG00000013724"; transcript_id "rmCircRNA-155"; gene_name "CWF19L2"; gene_biotype "protein_coding"; transcript_biotype "circRNA"; oId "lv:circCWF19L2-1565-001|ce:circCWF19L2-3573-001|ts:circCWF19L2-2813-001"; tissue "lv|ce|ts";
14	ncSplice	exon	105985082	105985219	.	-	.	gene_id "ENSMMUG00000013724"; transcript_id "rmCircRNA-155"; exon_number "1" gene_name "CWF19L2"; gene_biotype "protein_coding"; oId "lv:circCWF19L2-1565-001|ce:circCWF19L2-3573-001|ts:circCWF19L2-2813-001"; tissue "lv|ce|ts";
14	ncSplice	exon	105987791	105987907	.	-	.	gene_id "ENSMMUG00000013724"; transcript_id "rmCircRNA-155"; exon_number "2" gene_name "CWF19L2"; gene_biotype "protein_coding"; oId "lv:circCWF19L2-1565-001|ce:circCWF19L2-3573-001|ts:circCWF19L2-2813-001"; tissue "lv|ce|ts";
14	ncSplice	exon	106008187	106008276	.	-	.	gene_id "ENSMMUG00000013724"; transcript_id "rmCircRNA-155"; exon_number "3" gene_name "CWF19L2"; gene_biotype "protein_coding"; oId "lv:circCWF19L2-1565-001|ce:circCWF19L2-3573-001|ts:circCWF19L2-2813-001"; tissue "lv|ce|ts";
14	ncSplice	exon	106010165	106010258	.	-	.	gene_id "ENSMMUG00000013724"; transcript_id "rmCircRNA-155"; exon_number "4" gene_name "CWF19L2"; gene_biotype "protein_coding"; oId "lv:circCWF19L2-1565-001|ce:circCWF19L2-3573-001|ts:circCWF19L2-2813-001"; tissue "lv|ce|ts";
14	ncSplice	gene	106810233	106811934	.	+	.	gene_id "ENSMMUG00000004153"; gene_name "ATM"; gene_source "ncSplice"; gene_biotype "protein_coding";
14	ncSplice	transcript	106810233	106811934	.	+	.	gene_id "ENSMMUG00000004153"; transcript_id "rmCircRNA-156"; gene_name "ATM"; gene_biotype "protein_coding"; transcript_biotype "circRNA"; oId "lv:circATM-1571-001|ce:circATM-3594-001|ts:circATM-2821-001"; tissue "lv|ce|ts";
14	ncSplice	exon	106810233	106810330	.	+	.	gene_id "ENSMMUG00000004153"; transcript_id "rmCircRNA-156"; exon_number "1" gene_name "ATM"; gene_biotype "protein_coding"; oId "lv:circATM-1571-001|ce:circATM-3594-001|ts:circATM-2821-001"; tissue "lv|ce|ts";
14	ncSplice	exon	106810410	106810522	.	+	.	gene_id "ENSMMUG00000004153"; transcript_id "rmCircRNA-156"; exon_number "2" gene_name "ATM"; gene_biotype "protein_coding"; oId "lv:circATM-1571-001|ce:circATM-3594-001|ts:circATM-2821-001"; tissue "lv|ce|ts";
14	ncSplice	exon	106811789	106811934	.	+	.	gene_id "ENSMMUG00000004153"; transcript_id "rmCircRNA-156"; exon_number "3" gene_name "ATM"; gene_biotype "protein_coding"; oId "lv:circATM-1571-001|ce:circATM-3594-001|ts:circATM-2821-001"; tissue "lv|ce|ts";
14	ncSplice	gene	106810233	106818661	.	+	.	gene_id "ENSMMUG00000004153"; gene_name "ATM"; gene_source "ncSplice"; gene_biotype "protein_coding";
14	ncSplice	transcript	106810233	106818661	.	+	.	gene_id "ENSMMUG00000004153"; transcript_id "rmCircRNA-157"; gene_name "ATM"; gene_biotype "protein_coding"; transcript_biotype "circRNA"; oId "lv:circATM-1572-001|ce:circATM-3595-001|ts:circATM-2822-001"; tissue "lv|ce|ts";
14	ncSplice	exon	106810233	106810330	.	+	.	gene_id "ENSMMUG00000004153"; transcript_id "rmCircRNA-157"; exon_number "1" gene_name "ATM"; gene_biotype "protein_coding"; oId "lv:circATM-1572-001|ce:circATM-3595-001|ts:circATM-2822-001"; tissue "lv|ce|ts";
14	ncSplice	exon	106810410	106810522	.	+	.	gene_id "ENSMMUG00000004153"; transcript_id "rmCircRNA-157"; exon_number "2" gene_name "ATM"; gene_biotype "protein_coding"; oId "lv:circATM-1572-001|ce:circATM-3595-001|ts:circATM-2822-001"; tissue "lv|ce|ts";
14	ncSplice	exon	106811789	106811934	.	+	.	gene_id "ENSMMUG00000004153"; transcript_id "rmCircRNA-157"; exon_number "3" gene_name "ATM"; gene_biotype "protein_coding"; oId "lv:circATM-1572-001|ce:circATM-3595-001|ts:circATM-2822-001"; tissue "lv|ce|ts";
14	ncSplice	exon	106818497	106818661	.	+	.	gene_id "ENSMMUG00000004153"; transcript_id "rmCircRNA-157"; exon_number "4" gene_name "ATM"; gene_biotype "protein_coding"; oId "lv:circATM-1572-001|ce:circATM-3595-001|ts:circATM-2822-001"; tissue "lv|ce|ts";
14	ncSplice	gene	110217004	110218128	.	-	.	gene_id "ENSMMUG00000014001"; gene_name "PPP2R1B"; gene_source "ncSplice"; gene_biotype "protein_coding";
14	ncSplice	transcript	110217004	110218128	.	-	.	gene_id "ENSMMUG00000014001"; transcript_id "rmCircRNA-158"; gene_name "PPP2R1B"; gene_biotype "protein_coding"; transcript_biotype "circRNA"; oId "lv:circPPP2R1B-1580-001|ce:circPPP2R1B-3613-001"; tissue "lv|ce";
14	ncSplice	exon	110217004	110217177	.	-	.	gene_id "ENSMMUG00000014001"; transcript_id "rmCircRNA-158"; exon_number "1" gene_name "PPP2R1B"; gene_biotype "protein_coding"; oId "lv:circPPP2R1B-1580-001|ce:circPPP2R1B-3613-001"; tissue "lv|ce";
14	ncSplice	exon	110217994	110218128	.	-	.	gene_id "ENSMMUG00000014001"; transcript_id "rmCircRNA-158"; exon_number "2" gene_name "PPP2R1B"; gene_biotype "protein_coding"; oId "lv:circPPP2R1B-1580-001|ce:circPPP2R1B-3613-001"; tissue "lv|ce";
14	ncSplice	gene	112543333	112544690	.	+	.	gene_id "ENSMMUG00000007085"; gene_name "ZBTB16"; gene_source "ncSplice"; gene_biotype "protein_coding";
14	ncSplice	transcript	112543333	112544690	.	+	.	gene_id "ENSMMUG00000007085"; transcript_id "rmCircRNA-159"; gene_name "ZBTB16"; gene_biotype "protein_coding"; transcript_biotype "circRNA"; oId "lv:circZBTB16-1594-001"; tissue "lv";
14	ncSplice	exon	112543333	112544172	.	+	.	gene_id "ENSMMUG00000007085"; transcript_id "rmCircRNA-159"; exon_number "1" gene_name "ZBTB16"; gene_biotype "protein_coding"; oId "lv:circZBTB16-1594-001"; tissue "lv";
14	ncSplice	exon	112544500	112544690	.	+	.	gene_id "ENSMMUG00000007085"; transcript_id "rmCircRNA-159"; exon_number "2" gene_name "ZBTB16"; gene_biotype "protein_coding"; oId "lv:circZBTB16-1594-001"; tissue "lv";
14	ncSplice	gene	11361286	11362124	.	+	.	gene_id "ENSMMUG00000014363"; gene_name "BSCL2"; gene_source "ncSplice"; gene_biotype "protein_coding";
14	ncSplice	transcript	11361286	11362124	.	+	.	gene_id "ENSMMUG00000014363"; transcript_id "rmCircRNA-160"; gene_name "BSCL2"; gene_biotype "protein_coding"; transcript_biotype "circRNA"; oId "lv:circBSCL2-1598-001|ce:circBSCL2-3637-001"; tissue "lv|ce";
14	ncSplice	exon	11361286	11361421	.	+	.	gene_id "ENSMMUG00000014363"; transcript_id "rmCircRNA-160"; exon_number "1" gene_name "BSCL2"; gene_biotype "protein_coding"; oId "lv:circBSCL2-1598-001|ce:circBSCL2-3637-001"; tissue "lv|ce";
14	ncSplice	exon	11361720	11361796	.	+	.	gene_id "ENSMMUG00000014363"; transcript_id "rmCircRNA-160"; exon_number "2" gene_name "BSCL2"; gene_biotype "protein_coding"; oId "lv:circBSCL2-1598-001|ce:circBSCL2-3637-001"; tissue "lv|ce";
14	ncSplice	exon	11361985	11362124	.	+	.	gene_id "ENSMMUG00000014363"; transcript_id "rmCircRNA-160"; exon_number "3" gene_name "BSCL2"; gene_biotype "protein_coding"; oId "lv:circBSCL2-1598-001|ce:circBSCL2-3637-001"; tissue "lv|ce";
14	ncSplice	gene	116983563	116984398	.	+	.	gene_id "ENSMMUG00000002543"; gene_name "ARCN1"; gene_source "ncSplice"; gene_biotype "protein_coding";
14	ncSplice	transcript	116983563	116984398	.	+	.	gene_id "ENSMMUG00000002543"; transcript_id "rmCircRNA-161"; gene_name "ARCN1"; gene_biotype "protein_coding"; transcript_biotype "circRNA"; oId "lv:circARCN1-1610-001|ce:circARCN1-3681-001"; tissue "lv|ce";
14	ncSplice	exon	116983563	116983768	.	+	.	gene_id "ENSMMUG00000002543"; transcript_id "rmCircRNA-161"; exon_number "1" gene_name "ARCN1"; gene_biotype "protein_coding"; oId "lv:circARCN1-1610-001|ce:circARCN1-3681-001"; tissue "lv|ce";
14	ncSplice	exon	116984234	116984398	.	+	.	gene_id "ENSMMUG00000002543"; transcript_id "rmCircRNA-161"; exon_number "2" gene_name "ARCN1"; gene_biotype "protein_coding"; oId "lv:circARCN1-1610-001|ce:circARCN1-3681-001"; tissue "lv|ce";
14	ncSplice	gene	118884722	118887695	.	+	.	gene_id "14:118884721:118887695:1"; gene_name "14:118884721:118887695:1"; gene_source "ncSplice"; gene_biotype "novel";
14	ncSplice	transcript	118884722	118887695	.	+	.	gene_id "14:118884721:118887695:1"; transcript_id "rmCircRNA-162"; gene_name "14:118884721:118887695:1"; gene_biotype "novel"; transcript_biotype "circRNA"; oId "lv:circ14:118884721:118887695:1-1621-001|ce:circ14:118884721:118887695:1-3702-001"; tissue "lv|ce";
14	ncSplice	exon	118884722	118884797	.	+	.	gene_id "14:118884721:118887695:1"; transcript_id "rmCircRNA-162"; exon_number "1" gene_name "14:118884721:118887695:1"; gene_biotype "novel"; oId "lv:circ14:118884721:118887695:1-1621-001|ce:circ14:118884721:118887695:1-3702-001"; tissue "lv|ce";
14	ncSplice	exon	118885508	118885675	.	+	.	gene_id "14:118884721:118887695:1"; transcript_id "rmCircRNA-162"; exon_number "2" gene_name "14:118884721:118887695:1"; gene_biotype "novel"; oId "lv:circ14:118884721:118887695:1-1621-001|ce:circ14:118884721:118887695:1-3702-001"; tissue "lv|ce";
14	ncSplice	exon	118886816	118886903	.	+	.	gene_id "14:118884721:118887695:1"; transcript_id "rmCircRNA-162"; exon_number "3" gene_name "14:118884721:118887695:1"; gene_biotype "novel"; oId "lv:circ14:118884721:118887695:1-1621-001|ce:circ14:118884721:118887695:1-3702-001"; tissue "lv|ce";
14	ncSplice	exon	118887388	118887474	.	+	.	gene_id "14:118884721:118887695:1"; transcript_id "rmCircRNA-162"; exon_number "4" gene_name "14:118884721:118887695:1"; gene_biotype "novel"; oId "lv:circ14:118884721:118887695:1-1621-001|ce:circ14:118884721:118887695:1-3702-001"; tissue "lv|ce";
14	ncSplice	exon	118887616	118887695	.	+	.	gene_id "14:118884721:118887695:1"; transcript_id "rmCircRNA-162"; exon_number "5" gene_name "14:118884721:118887695:1"; gene_biotype "novel"; oId "lv:circ14:118884721:118887695:1-1621-001|ce:circ14:118884721:118887695:1-3702-001"; tissue "lv|ce";
14	ncSplice	gene	12648144	12648662	.	-	.	gene_id "ENSMMUG00000015281"; gene_name "SDHAF2"; gene_source "ncSplice"; gene_biotype "protein_coding";
14	ncSplice	transcript	12648144	12648662	.	-	.	gene_id "ENSMMUG00000015281"; transcript_id "rmCircRNA-163"; gene_name "SDHAF2"; gene_biotype "protein_coding"; transcript_biotype "circRNA"; oId "lv:circSDHAF2-1637-001|ce:circSDHAF2-3740-001|ts:circSDHAF2-2912-001"; tissue "lv|ce|ts";
14	ncSplice	exon	12648144	12648253	.	-	.	gene_id "ENSMMUG00000015281"; transcript_id "rmCircRNA-163"; exon_number "1" gene_name "SDHAF2"; gene_biotype "protein_coding"; oId "lv:circSDHAF2-1637-001|ce:circSDHAF2-3740-001|ts:circSDHAF2-2912-001"; tissue "lv|ce|ts";
14	ncSplice	exon	12648439	12648662	.	-	.	gene_id "ENSMMUG00000015281"; transcript_id "rmCircRNA-163"; exon_number "2" gene_name "SDHAF2"; gene_biotype "protein_coding"; oId "lv:circSDHAF2-1637-001|ce:circSDHAF2-3740-001|ts:circSDHAF2-2912-001"; tissue "lv|ce|ts";
14	ncSplice	gene	127233022	127261386	.	-	.	gene_id "14:127233021:127261386:-1"; gene_name "14:127233021:127261386:-1"; gene_source "ncSplice"; gene_biotype "novel";
14	ncSplice	transcript	127233022	127261386	.	-	.	gene_id "14:127233021:127261386:-1"; transcript_id "rmCircRNA-164"; gene_name "14:127233021:127261386:-1"; gene_biotype "novel"; transcript_biotype "circRNA"; oId "lv:circ14:127233021:127261386:-1-1641-001"; tissue "lv";
14	ncSplice	exon	127233022	127233108	.	-	.	gene_id "14:127233021:127261386:-1"; transcript_id "rmCircRNA-164"; exon_number "1" gene_name "14:127233021:127261386:-1"; gene_biotype "novel"; oId "lv:circ14:127233021:127261386:-1-1641-001"; tissue "lv";
14	ncSplice	exon	127259951	127260035	.	-	.	gene_id "14:127233021:127261386:-1"; transcript_id "rmCircRNA-164"; exon_number "2" gene_name "14:127233021:127261386:-1"; gene_biotype "novel"; oId "lv:circ14:127233021:127261386:-1-1641-001"; tissue "lv";
14	ncSplice	exon	127260385	127260426	.	-	.	gene_id "14:127233021:127261386:-1"; transcript_id "rmCircRNA-164"; exon_number "3" gene_name "14:127233021:127261386:-1"; gene_biotype "novel"; oId "lv:circ14:127233021:127261386:-1-1641-001"; tissue "lv";
14	ncSplice	exon	127261295	127261386	.	-	.	gene_id "14:127233021:127261386:-1"; transcript_id "rmCircRNA-164"; exon_number "4" gene_name "14:127233021:127261386:-1"; gene_biotype "novel"; oId "lv:circ14:127233021:127261386:-1-1641-001"; tissue "lv";
14	ncSplice	gene	127233022	127298298	.	-	.	gene_id "14:127233021:127298298:-1"; gene_name "14:127233021:127298298:-1"; gene_source "ncSplice"; gene_biotype "novel";
14	ncSplice	transcript	127233022	127298298	.	-	.	gene_id "14:127233021:127298298:-1"; transcript_id "rmCircRNA-165"; gene_name "14:127233021:127298298:-1"; gene_biotype "novel"; transcript_biotype "circRNA"; oId "lv:circ14:127233021:127298298:-1-1643-002|ce:circ14:127233021:127298298:-1-3750-012"; tissue "lv|ce";
14	ncSplice	exon	127233022	127233108	.	-	.	gene_id "14:127233021:127298298:-1"; transcript_id "rmCircRNA-165"; exon_number "1" gene_name "14:127233021:127298298:-1"; gene_biotype "novel"; oId "lv:circ14:127233021:127298298:-1-1643-002|ce:circ14:127233021:127298298:-1-3750-012"; tissue "lv|ce";
14	ncSplice	exon	127259951	127260035	.	-	.	gene_id "14:127233021:127298298:-1"; transcript_id "rmCircRNA-165"; exon_number "2" gene_name "14:127233021:127298298:-1"; gene_biotype "novel"; oId "lv:circ14:127233021:127298298:-1-1643-002|ce:circ14:127233021:127298298:-1-3750-012"; tissue "lv|ce";
14	ncSplice	exon	127260385	127260426	.	-	.	gene_id "14:127233021:127298298:-1"; transcript_id "rmCircRNA-165"; exon_number "3" gene_name "14:127233021:127298298:-1"; gene_biotype "novel"; oId "lv:circ14:127233021:127298298:-1-1643-002|ce:circ14:127233021:127298298:-1-3750-012"; tissue "lv|ce";
14	ncSplice	exon	127261295	127261386	.	-	.	gene_id "14:127233021:127298298:-1"; transcript_id "rmCircRNA-165"; exon_number "4" gene_name "14:127233021:127298298:-1"; gene_biotype "novel"; oId "lv:circ14:127233021:127298298:-1-1643-002|ce:circ14:127233021:127298298:-1-3750-012"; tissue "lv|ce";
14	ncSplice	exon	127298190	127298298	.	-	.	gene_id "14:127233021:127298298:-1"; transcript_id "rmCircRNA-165"; exon_number "5" gene_name "14:127233021:127298298:-1"; gene_biotype "novel"; oId "lv:circ14:127233021:127298298:-1-1643-002|ce:circ14:127233021:127298298:-1-3750-012"; tissue "lv|ce";
14	ncSplice	gene	127259951	127298298	.	-	.	gene_id "14:127259950:127298298:-1"; gene_name "14:127259950:127298298:-1"; gene_source "ncSplice"; gene_biotype "novel";
14	ncSplice	transcript	127259951	127298298	.	-	.	gene_id "14:127259950:127298298:-1"; transcript_id "rmCircRNA-166"; gene_name "14:127259950:127298298:-1"; gene_biotype "novel"; transcript_biotype "circRNA"; oId "lv:circ14:127259950:127298298:-1-1646-002|ce:circ14:127259950:127298298:-1-3752-002|ts:circ14:127259950:127298298:-1-2922-004"; tissue "lv|ce|ts";
14	ncSplice	exon	127259951	127260035	.	-	.	gene_id "14:127259950:127298298:-1"; transcript_id "rmCircRNA-166"; exon_number "1" gene_name "14:127259950:127298298:-1"; gene_biotype "novel"; oId "lv:circ14:127259950:127298298:-1-1646-002|ce:circ14:127259950:127298298:-1-3752-002|ts:circ14:127259950:127298298:-1-2922-004"; tissue "lv|ce|ts";
14	ncSplice	exon	127260385	127260426	.	-	.	gene_id "14:127259950:127298298:-1"; transcript_id "rmCircRNA-166"; exon_number "2" gene_name "14:127259950:127298298:-1"; gene_biotype "novel"; oId "lv:circ14:127259950:127298298:-1-1646-002|ce:circ14:127259950:127298298:-1-3752-002|ts:circ14:127259950:127298298:-1-2922-004"; tissue "lv|ce|ts";
14	ncSplice	exon	127261295	127261386	.	-	.	gene_id "14:127259950:127298298:-1"; transcript_id "rmCircRNA-166"; exon_number "3" gene_name "14:127259950:127298298:-1"; gene_biotype "novel"; oId "lv:circ14:127259950:127298298:-1-1646-002|ce:circ14:127259950:127298298:-1-3752-002|ts:circ14:127259950:127298298:-1-2922-004"; tissue "lv|ce|ts";
14	ncSplice	exon	127298190	127298298	.	-	.	gene_id "14:127259950:127298298:-1"; transcript_id "rmCircRNA-166"; exon_number "4" gene_name "14:127259950:127298298:-1"; gene_biotype "novel"; oId "lv:circ14:127259950:127298298:-1-1646-002|ce:circ14:127259950:127298298:-1-3752-002|ts:circ14:127259950:127298298:-1-2922-004"; tissue "lv|ce|ts";
14	ncSplice	gene	128172493	128173744	.	+	.	gene_id "ENSMMUG00000018029"; gene_name "APLP2"; gene_source "ncSplice"; gene_biotype "protein_coding";
14	ncSplice	transcript	128172493	128173744	.	+	.	gene_id "ENSMMUG00000018029"; transcript_id "rmCircRNA-167"; gene_name "APLP2"; gene_biotype "protein_coding"; transcript_biotype "circRNA"; oId "lv:circAPLP2-1654-003|ce:circAPLP2-3757-004"; tissue "lv|ce";
14	ncSplice	exon	128172493	128172666	.	+	.	gene_id "ENSMMUG00000018029"; transcript_id "rmCircRNA-167"; exon_number "1" gene_name "APLP2"; gene_biotype "protein_coding"; oId "lv:circAPLP2-1654-003|ce:circAPLP2-3757-004"; tissue "lv|ce";
14	ncSplice	exon	128172763	128172895	.	+	.	gene_id "ENSMMUG00000018029"; transcript_id "rmCircRNA-167"; exon_number "2" gene_name "APLP2"; gene_biotype "protein_coding"; oId "lv:circAPLP2-1654-003|ce:circAPLP2-3757-004"; tissue "lv|ce";
14	ncSplice	exon	128173621	128173744	.	+	.	gene_id "ENSMMUG00000018029"; transcript_id "rmCircRNA-167"; exon_number "3" gene_name "APLP2"; gene_biotype "protein_coding"; oId "lv:circAPLP2-1654-003|ce:circAPLP2-3757-004"; tissue "lv|ce";
1	ncSplice	gene	4296700	4297391	.	-	.	gene_id "ENSMMUG00000019518"; gene_name "SDF4"; gene_source "ncSplice"; gene_biotype "protein_coding";
1	ncSplice	transcript	4296700	4297391	.	-	.	gene_id "ENSMMUG00000019518"; transcript_id "rmCircRNA-168"; gene_name "SDF4"; gene_biotype "protein_coding"; transcript_biotype "circRNA"; oId "lv:circSDF4-1696-001|ce:circSDF4-3850-001"; tissue "lv|ce";
1	ncSplice	exon	4296700	4296813	.	-	.	gene_id "ENSMMUG00000019518"; transcript_id "rmCircRNA-168"; exon_number "1" gene_name "SDF4"; gene_biotype "protein_coding"; oId "lv:circSDF4-1696-001|ce:circSDF4-3850-001"; tissue "lv|ce";
1	ncSplice	exon	4297255	4297391	.	-	.	gene_id "ENSMMUG00000019518"; transcript_id "rmCircRNA-168"; exon_number "2" gene_name "SDF4"; gene_biotype "protein_coding"; oId "lv:circSDF4-1696-001|ce:circSDF4-3850-001"; tissue "lv|ce";
14	ncSplice	gene	2978830	2981259	.	-	.	gene_id "ENSMMUG00000007753"; gene_name "NAP1L4"; gene_source "ncSplice"; gene_biotype "protein_coding";
14	ncSplice	transcript	2978830	2981259	.	-	.	gene_id "ENSMMUG00000007753"; transcript_id "rmCircRNA-169"; gene_name "NAP1L4"; gene_biotype "protein_coding"; transcript_biotype "circRNA"; oId "lv:circNAP1L4-1697-001|ce:circNAP1L4-3851-001"; tissue "lv|ce";
14	ncSplice	exon	2978830	2979325	.	-	.	gene_id "ENSMMUG00000007753"; transcript_id "rmCircRNA-169"; exon_number "1" gene_name "NAP1L4"; gene_biotype "protein_coding"; oId "lv:circNAP1L4-1697-001|ce:circNAP1L4-3851-001"; tissue "lv|ce";
14	ncSplice	exon	2980460	2980546	.	-	.	gene_id "ENSMMUG00000007753"; transcript_id "rmCircRNA-169"; exon_number "2" gene_name "NAP1L4"; gene_biotype "protein_coding"; oId "lv:circNAP1L4-1697-001|ce:circNAP1L4-3851-001"; tissue "lv|ce";
14	ncSplice	exon	2981118	2981259	.	-	.	gene_id "ENSMMUG00000007753"; transcript_id "rmCircRNA-169"; exon_number "3" gene_name "NAP1L4"; gene_biotype "protein_coding"; oId "lv:circNAP1L4-1697-001|ce:circNAP1L4-3851-001"; tissue "lv|ce";
14	ncSplice	gene	37730111	37731999	.	-	.	gene_id "ENSMMUG00000021643"; gene_name "CAPRIN1"; gene_source "ncSplice"; gene_biotype "protein_coding";
14	ncSplice	transcript	37730111	37731999	.	-	.	gene_id "ENSMMUG00000021643"; transcript_id "rmCircRNA-170"; gene_name "CAPRIN1"; gene_biotype "protein_coding"; transcript_biotype "circRNA"; oId "lv:circCAPRIN1-1712-001|ce:circCAPRIN1-3888-001"; tissue "lv|ce";
14	ncSplice	exon	37730111	37730261	.	-	.	gene_id "ENSMMUG00000021643"; transcript_id "rmCircRNA-170"; exon_number "1" gene_name "CAPRIN1"; gene_biotype "protein_coding"; oId "lv:circCAPRIN1-1712-001|ce:circCAPRIN1-3888-001"; tissue "lv|ce";
14	ncSplice	exon	37731500	37731649	.	-	.	gene_id "ENSMMUG00000021643"; transcript_id "rmCircRNA-170"; exon_number "2" gene_name "CAPRIN1"; gene_biotype "protein_coding"; oId "lv:circCAPRIN1-1712-001|ce:circCAPRIN1-3888-001"; tissue "lv|ce";
14	ncSplice	exon	37731889	37731999	.	-	.	gene_id "ENSMMUG00000021643"; transcript_id "rmCircRNA-170"; exon_number "3" gene_name "CAPRIN1"; gene_biotype "protein_coding"; oId "lv:circCAPRIN1-1712-001|ce:circCAPRIN1-3888-001"; tissue "lv|ce";
14	ncSplice	gene	37731500	37731999	.	-	.	gene_id "ENSMMUG00000021643"; gene_name "CAPRIN1"; gene_source "ncSplice"; gene_biotype "protein_coding";
14	ncSplice	transcript	37731500	37731999	.	-	.	gene_id "ENSMMUG00000021643"; transcript_id "rmCircRNA-171"; gene_name "CAPRIN1"; gene_biotype "protein_coding"; transcript_biotype "circRNA"; oId "lv:circCAPRIN1-1715-001|ce:circCAPRIN1-3891-001"; tissue "lv|ce";
14	ncSplice	exon	37731500	37731649	.	-	.	gene_id "ENSMMUG00000021643"; transcript_id "rmCircRNA-171"; exon_number "1" gene_name "CAPRIN1"; gene_biotype "protein_coding"; oId "lv:circCAPRIN1-1715-001|ce:circCAPRIN1-3891-001"; tissue "lv|ce";
14	ncSplice	exon	37731889	37731999	.	-	.	gene_id "ENSMMUG00000021643"; transcript_id "rmCircRNA-171"; exon_number "2" gene_name "CAPRIN1"; gene_biotype "protein_coding"; oId "lv:circCAPRIN1-1715-001|ce:circCAPRIN1-3891-001"; tissue "lv|ce";
14	ncSplice	gene	4419564	4421525	.	-	.	gene_id "ENSMMUG00000013265"; gene_name "PPFIA1"; gene_source "ncSplice"; gene_biotype "protein_coding";
14	ncSplice	transcript	4419564	4421525	.	-	.	gene_id "ENSMMUG00000013265"; transcript_id "rmCircRNA-172"; gene_name "PPFIA1"; gene_biotype "protein_coding"; transcript_biotype "circRNA"; oId "lv:circPPFIA1-1735-001|ce:circPPFIA1-3926-001|ts:circPPFIA1-3084-002"; tissue "lv|ce|ts";
14	ncSplice	exon	4419564	4419657	.	-	.	gene_id "ENSMMUG00000013265"; transcript_id "rmCircRNA-172"; exon_number "1" gene_name "PPFIA1"; gene_biotype "protein_coding"; oId "lv:circPPFIA1-1735-001|ce:circPPFIA1-3926-001|ts:circPPFIA1-3084-002"; tissue "lv|ce|ts";
14	ncSplice	exon	4420008	4420180	.	-	.	gene_id "ENSMMUG00000013265"; transcript_id "rmCircRNA-172"; exon_number "2" gene_name "PPFIA1"; gene_biotype "protein_coding"; oId "lv:circPPFIA1-1735-001|ce:circPPFIA1-3926-001|ts:circPPFIA1-3084-002"; tissue "lv|ce|ts";
14	ncSplice	exon	4421374	4421525	.	-	.	gene_id "ENSMMUG00000013265"; transcript_id "rmCircRNA-172"; exon_number "3" gene_name "PPFIA1"; gene_biotype "protein_coding"; oId "lv:circPPFIA1-1735-001|ce:circPPFIA1-3926-001|ts:circPPFIA1-3084-002"; tissue "lv|ce|ts";
1	ncSplice	gene	45158141	45170381	.	-	.	gene_id "ENSMMUG00000014138"; gene_name "FOXJ3"; gene_source "ncSplice"; gene_biotype "protein_coding";
1	ncSplice	transcript	45158141	45170381	.	-	.	gene_id "ENSMMUG00000014138"; transcript_id "rmCircRNA-173"; gene_name "FOXJ3"; gene_biotype "protein_coding"; transcript_biotype "circRNA"; oId "lv:circFOXJ3-1749-001"; tissue "lv";
1	ncSplice	exon	45158141	45167824	.	-	.	gene_id "ENSMMUG00000014138"; transcript_id "rmCircRNA-173"; exon_number "1" gene_name "FOXJ3"; gene_biotype "protein_coding"; oId "lv:circFOXJ3-1749-001"; tissue "lv";
1	ncSplice	exon	45170057	45170381	.	-	.	gene_id "ENSMMUG00000014138"; transcript_id "rmCircRNA-173"; exon_number "2" gene_name "FOXJ3"; gene_biotype "protein_coding"; oId "lv:circFOXJ3-1749-001"; tissue "lv";
14	ncSplice	gene	53809191	53812990	.	+	.	gene_id "ENSMMUG00000014378"; gene_name "SAA3P"; gene_source "ncSplice"; gene_biotype "protein_coding";
14	ncSplice	transcript	53809191	53812990	.	+	.	gene_id "ENSMMUG00000014378"; transcript_id "rmCircRNA-174"; gene_name "SAA3P"; gene_biotype "protein_coding"; transcript_biotype "circRNA"; oId "lv:circSAA3P-1758-001"; tissue "lv";
14	ncSplice	exon	53809191	53811244	.	+	.	gene_id "ENSMMUG00000014378"; transcript_id "rmCircRNA-174"; exon_number "1" gene_name "SAA3P"; gene_biotype "protein_coding"; oId "lv:circSAA3P-1758-001"; tissue "lv";
14	ncSplice	exon	53812896	53812990	.	+	.	gene_id "ENSMMUG00000014378"; transcript_id "rmCircRNA-174"; exon_number "2" gene_name "SAA3P"; gene_biotype "protein_coding"; oId "lv:circSAA3P-1758-001"; tissue "lv";
14	ncSplice	gene	55587403	55609770	.	+	.	gene_id "ENSMMUG00000002753"; gene_name "SOX6"; gene_source "ncSplice"; gene_biotype "protein_coding";
14	ncSplice	transcript	55587403	55609770	.	+	.	gene_id "ENSMMUG00000002753"; transcript_id "rmCircRNA-175"; gene_name "SOX6"; gene_biotype "protein_coding"; transcript_biotype "circRNA"; oId "lv:circSOX6-1768-001|ce:circSOX6-4000-003|ts:circSOX6-3133-005"; tissue "lv|ce|ts";
14	ncSplice	exon	55587403	55587643	.	+	.	gene_id "ENSMMUG00000002753"; transcript_id "rmCircRNA-175"; exon_number "1" gene_name "SOX6"; gene_biotype "protein_coding"; oId "lv:circSOX6-1768-001|ce:circSOX6-4000-003|ts:circSOX6-3133-005"; tissue "lv|ce|ts";
14	ncSplice	exon	55609563	55609770	.	+	.	gene_id "ENSMMUG00000002753"; transcript_id "rmCircRNA-175"; exon_number "2" gene_name "SOX6"; gene_biotype "protein_coding"; oId "lv:circSOX6-1768-001|ce:circSOX6-4000-003|ts:circSOX6-3133-005"; tissue "lv|ce|ts";
14	ncSplice	gene	57630463	57631853	.	+	.	gene_id "ENSMMUG00000000664"; gene_name "RRAS2"; gene_source "ncSplice"; gene_biotype "protein_coding";
14	ncSplice	transcript	57630463	57631853	.	+	.	gene_id "ENSMMUG00000000664"; transcript_id "rmCircRNA-176"; gene_name "RRAS2"; gene_biotype "protein_coding"; transcript_biotype "circRNA"; oId "lv:circRRAS2-1776-001|ce:circRRAS2-4012-001|ts:circRRAS2-3157-001"; tissue "lv|ce|ts";
14	ncSplice	exon	57630463	57630550	.	+	.	gene_id "ENSMMUG00000000664"; transcript_id "rmCircRNA-176"; exon_number "1" gene_name "RRAS2"; gene_biotype "protein_coding"; oId "lv:circRRAS2-1776-001|ce:circRRAS2-4012-001|ts:circRRAS2-3157-001"; tissue "lv|ce|ts";
14	ncSplice	exon	57631458	57631560	.	+	.	gene_id "ENSMMUG00000000664"; transcript_id "rmCircRNA-176"; exon_number "2" gene_name "RRAS2"; gene_biotype "protein_coding"; oId "lv:circRRAS2-1776-001|ce:circRRAS2-4012-001|ts:circRRAS2-3157-001"; tissue "lv|ce|ts";
14	ncSplice	exon	57631745	57631853	.	+	.	gene_id "ENSMMUG00000000664"; transcript_id "rmCircRNA-176"; exon_number "3" gene_name "RRAS2"; gene_biotype "protein_coding"; oId "lv:circRRAS2-1776-001|ce:circRRAS2-4012-001|ts:circRRAS2-3157-001"; tissue "lv|ce|ts";
14	ncSplice	gene	58473417	58481042	.	+	.	gene_id "ENSMMUG00000009695"; gene_name "BTBD10"; gene_source "ncSplice"; gene_biotype "protein_coding";
14	ncSplice	transcript	58473417	58481042	.	+	.	gene_id "ENSMMUG00000009695"; transcript_id "rmCircRNA-177"; gene_name "BTBD10"; gene_biotype "protein_coding"; transcript_biotype "circRNA"; oId "lv:circBTBD10-1779-001|ce:circBTBD10-4018-001|ts:circBTBD10-3161-001"; tissue "lv|ce|ts";
14	ncSplice	exon	58473417	58473613	.	+	.	gene_id "ENSMMUG00000009695"; transcript_id "rmCircRNA-177"; exon_number "1" gene_name "BTBD10"; gene_biotype "protein_coding"; oId "lv:circBTBD10-1779-001|ce:circBTBD10-4018-001|ts:circBTBD10-3161-001"; tissue "lv|ce|ts";
14	ncSplice	exon	58475455	58475740	.	+	.	gene_id "ENSMMUG00000009695"; transcript_id "rmCircRNA-177"; exon_number "2" gene_name "BTBD10"; gene_biotype "protein_coding"; oId "lv:circBTBD10-1779-001|ce:circBTBD10-4018-001|ts:circBTBD10-3161-001"; tissue "lv|ce|ts";
14	ncSplice	exon	58477873	58477975	.	+	.	gene_id "ENSMMUG00000009695"; transcript_id "rmCircRNA-177"; exon_number "3" gene_name "BTBD10"; gene_biotype "protein_coding"; oId "lv:circBTBD10-1779-001|ce:circBTBD10-4018-001|ts:circBTBD10-3161-001"; tissue "lv|ce|ts";
14	ncSplice	exon	58480922	58481042	.	+	.	gene_id "ENSMMUG00000009695"; transcript_id "rmCircRNA-177"; exon_number "4" gene_name "BTBD10"; gene_biotype "protein_coding"; oId "lv:circBTBD10-1779-001|ce:circBTBD10-4018-001|ts:circBTBD10-3161-001"; tissue "lv|ce|ts";
14	ncSplice	gene	6158793	6177086	.	-	.	gene_id "ENSMMUG00000016213"; gene_name "PPP6R3"; gene_source "ncSplice"; gene_biotype "protein_coding";
14	ncSplice	transcript	6158793	6177086	.	-	.	gene_id "ENSMMUG00000016213"; transcript_id "rmCircRNA-178"; gene_name "PPP6R3"; gene_biotype "protein_coding"; transcript_biotype "circRNA"; oId "lv:circPPP6R3-1791-002|ce:circPPP6R3-4036-001"; tissue "lv|ce";
14	ncSplice	exon	6158793	6158922	.	-	.	gene_id "ENSMMUG00000016213"; transcript_id "rmCircRNA-178"; exon_number "1" gene_name "PPP6R3"; gene_biotype "protein_coding"; oId "lv:circPPP6R3-1791-002|ce:circPPP6R3-4036-001"; tissue "lv|ce";
14	ncSplice	exon	6169236	6169349	.	-	.	gene_id "ENSMMUG00000016213"; transcript_id "rmCircRNA-178"; exon_number "2" gene_name "PPP6R3"; gene_biotype "protein_coding"; oId "lv:circPPP6R3-1791-002|ce:circPPP6R3-4036-001"; tissue "lv|ce";
14	ncSplice	exon	6173958	6174070	.	-	.	gene_id "ENSMMUG00000016213"; transcript_id "rmCircRNA-178"; exon_number "3" gene_name "PPP6R3"; gene_biotype "protein_coding"; oId "lv:circPPP6R3-1791-002|ce:circPPP6R3-4036-001"; tissue "lv|ce";
14	ncSplice	exon	6177021	6177086	.	-	.	gene_id "ENSMMUG00000016213"; transcript_id "rmCircRNA-178"; exon_number "4" gene_name "PPP6R3"; gene_biotype "protein_coding"; oId "lv:circPPP6R3-1791-002|ce:circPPP6R3-4036-001"; tissue "lv|ce";
14	ncSplice	gene	62650968	62656449	.	+	.	gene_id "ENSMMUG00000005639"; gene_name "TMEM41B"; gene_source "ncSplice"; gene_biotype "protein_coding";
14	ncSplice	transcript	62650968	62656449	.	+	.	gene_id "ENSMMUG00000005639"; transcript_id "rmCircRNA-179"; gene_name "TMEM41B"; gene_biotype "protein_coding"; transcript_biotype "circRNA"; oId "lv:circTMEM41B-1797-002|ce:circTMEM41B-4052-002"; tissue "lv|ce";
14	ncSplice	exon	62650968	62651096	.	+	.	gene_id "ENSMMUG00000005639"; transcript_id "rmCircRNA-179"; exon_number "1" gene_name "TMEM41B"; gene_biotype "protein_coding"; oId "lv:circTMEM41B-1797-002|ce:circTMEM41B-4052-002"; tissue "lv|ce";
14	ncSplice	exon	62655644	62655737	.	+	.	gene_id "ENSMMUG00000005639"; transcript_id "rmCircRNA-179"; exon_number "2" gene_name "TMEM41B"; gene_biotype "protein_coding"; oId "lv:circTMEM41B-1797-002|ce:circTMEM41B-4052-002"; tissue "lv|ce";
14	ncSplice	exon	62656345	62656449	.	+	.	gene_id "ENSMMUG00000005639"; transcript_id "rmCircRNA-179"; exon_number "3" gene_name "TMEM41B"; gene_biotype "protein_coding"; oId "lv:circTMEM41B-1797-002|ce:circTMEM41B-4052-002"; tissue "lv|ce";
14	ncSplice	gene	69770320	69772702	.	+	.	gene_id "ENSMMUG00000003950"; gene_name "NUP98"; gene_source "ncSplice"; gene_biotype "protein_coding";
14	ncSplice	transcript	69770320	69772702	.	+	.	gene_id "ENSMMUG00000003950"; transcript_id "rmCircRNA-180"; gene_name "NUP98"; gene_biotype "protein_coding"; transcript_biotype "circRNA"; oId "lv:circNUP98-1809-001"; tissue "lv";
14	ncSplice	exon	69770320	69771407	.	+	.	gene_id "ENSMMUG00000003950"; transcript_id "rmCircRNA-180"; exon_number "1" gene_name "NUP98"; gene_biotype "protein_coding"; oId "lv:circNUP98-1809-001"; tissue "lv";
14	ncSplice	exon	69772595	69772702	.	+	.	gene_id "ENSMMUG00000003950"; transcript_id "rmCircRNA-180"; exon_number "2" gene_name "NUP98"; gene_biotype "protein_coding"; oId "lv:circNUP98-1809-001"; tissue "lv";
14	ncSplice	gene	71856484	71869929	.	-	.	gene_id "ENSMMUG00000009134"; gene_name ""; gene_source "ncSplice"; gene_biotype "protein_coding";
14	ncSplice	transcript	71856484	71869929	.	-	.	gene_id "ENSMMUG00000009134"; transcript_id "rmCircRNA-181"; gene_name ""; gene_biotype "protein_coding"; transcript_biotype "circRNA"; oId "lv:circ-1818-002"; tissue "lv";
14	ncSplice	exon	71856484	71859028	.	-	.	gene_id "ENSMMUG00000009134"; transcript_id "rmCircRNA-181"; exon_number "1" gene_name ""; gene_biotype "protein_coding"; oId "lv:circ-1818-002"; tissue "lv";
14	ncSplice	exon	71867470	71867581	.	-	.	gene_id "ENSMMUG00000009134"; transcript_id "rmCircRNA-181"; exon_number "2" gene_name ""; gene_biotype "protein_coding"; oId "lv:circ-1818-002"; tissue "lv";
14	ncSplice	exon	71869824	71869929	.	-	.	gene_id "ENSMMUG00000009134"; transcript_id "rmCircRNA-181"; exon_number "3" gene_name ""; gene_biotype "protein_coding"; oId "lv:circ-1818-002"; tissue "lv";
14	ncSplice	gene	81498969	81521589	.	+	.	gene_id "ENSMMUG00000005031"; gene_name "ANKRD42"; gene_source "ncSplice"; gene_biotype "protein_coding";
14	ncSplice	transcript	81498969	81521589	.	+	.	gene_id "ENSMMUG00000005031"; transcript_id "rmCircRNA-182"; gene_name "ANKRD42"; gene_biotype "protein_coding"; transcript_biotype "circRNA"; oId "lv:circANKRD42-1856-001"; tissue "lv";
14	ncSplice	exon	81498969	81503830	.	+	.	gene_id "ENSMMUG00000005031"; transcript_id "rmCircRNA-182"; exon_number "1" gene_name "ANKRD42"; gene_biotype "protein_coding"; oId "lv:circANKRD42-1856-001"; tissue "lv";
14	ncSplice	exon	81513003	81513147	.	+	.	gene_id "ENSMMUG00000005031"; transcript_id "rmCircRNA-182"; exon_number "2" gene_name "ANKRD42"; gene_biotype "protein_coding"; oId "lv:circANKRD42-1856-001"; tissue "lv";
14	ncSplice	exon	81521511	81521589	.	+	.	gene_id "ENSMMUG00000005031"; transcript_id "rmCircRNA-182"; exon_number "3" gene_name "ANKRD42"; gene_biotype "protein_coding"; oId "lv:circANKRD42-1856-001"; tissue "lv";
14	ncSplice	gene	84328522	84334852	.	-	.	gene_id "ENSMMUG00000019618"; gene_name "PICALM"; gene_source "ncSplice"; gene_biotype "protein_coding";
14	ncSplice	transcript	84328522	84334852	.	-	.	gene_id "ENSMMUG00000019618"; transcript_id "rmCircRNA-183"; gene_name "PICALM"; gene_biotype "protein_coding"; transcript_biotype "circRNA"; oId "lv:circPICALM-1864-002|ce:circPICALM-4218-001|ts:circPICALM-3315-002"; tissue "lv|ce|ts";
14	ncSplice	exon	84328522	84328625	.	-	.	gene_id "ENSMMUG00000019618"; transcript_id "rmCircRNA-183"; exon_number "1" gene_name "PICALM"; gene_biotype "protein_coding"; oId "lv:circPICALM-1864-002|ce:circPICALM-4218-001|ts:circPICALM-3315-002"; tissue "lv|ce|ts";
14	ncSplice	exon	84332058	84332194	.	-	.	gene_id "ENSMMUG00000019618"; transcript_id "rmCircRNA-183"; exon_number "2" gene_name "PICALM"; gene_biotype "protein_coding"; oId "lv:circPICALM-1864-002|ce:circPICALM-4218-001|ts:circPICALM-3315-002"; tissue "lv|ce|ts";
14	ncSplice	exon	84332442	84332565	.	-	.	gene_id "ENSMMUG00000019618"; transcript_id "rmCircRNA-183"; exon_number "3" gene_name "PICALM"; gene_biotype "protein_coding"; oId "lv:circPICALM-1864-002|ce:circPICALM-4218-001|ts:circPICALM-3315-002"; tissue "lv|ce|ts";
14	ncSplice	exon	84334767	84334852	.	-	.	gene_id "ENSMMUG00000019618"; transcript_id "rmCircRNA-183"; exon_number "4" gene_name "PICALM"; gene_biotype "protein_coding"; oId "lv:circPICALM-1864-002|ce:circPICALM-4218-001|ts:circPICALM-3315-002"; tissue "lv|ce|ts";
14	ncSplice	gene	84342194	84362875	.	-	.	gene_id "ENSMMUG00000019618"; gene_name "PICALM"; gene_source "ncSplice"; gene_biotype "protein_coding";
14	ncSplice	transcript	84342194	84362875	.	-	.	gene_id "ENSMMUG00000019618"; transcript_id "rmCircRNA-184"; gene_name "PICALM"; gene_biotype "protein_coding"; transcript_biotype "circRNA"; oId "lv:circPICALM-1868-005|ce:circPICALM-4224-002"; tissue "lv|ce";
14	ncSplice	exon	84342194	84342300	.	-	.	gene_id "ENSMMUG00000019618"; transcript_id "rmCircRNA-184"; exon_number "1" gene_name "PICALM"; gene_biotype "protein_coding"; oId "lv:circPICALM-1868-005|ce:circPICALM-4224-002"; tissue "lv|ce";
14	ncSplice	exon	84343429	84343540	.	-	.	gene_id "ENSMMUG00000019618"; transcript_id "rmCircRNA-184"; exon_number "2" gene_name "PICALM"; gene_biotype "protein_coding"; oId "lv:circPICALM-1868-005|ce:circPICALM-4224-002"; tissue "lv|ce";
14	ncSplice	exon	84346082	84346175	.	-	.	gene_id "ENSMMUG00000019618"; transcript_id "rmCircRNA-184"; exon_number "3" gene_name "PICALM"; gene_biotype "protein_coding"; oId "lv:circPICALM-1868-005|ce:circPICALM-4224-002"; tissue "lv|ce";
14	ncSplice	exon	84353727	84353829	.	-	.	gene_id "ENSMMUG00000019618"; transcript_id "rmCircRNA-184"; exon_number "4" gene_name "PICALM"; gene_biotype "protein_coding"; oId "lv:circPICALM-1868-005|ce:circPICALM-4224-002"; tissue "lv|ce";
14	ncSplice	exon	84357599	84357674	.	-	.	gene_id "ENSMMUG00000019618"; transcript_id "rmCircRNA-184"; exon_number "5" gene_name "PICALM"; gene_biotype "protein_coding"; oId "lv:circPICALM-1868-005|ce:circPICALM-4224-002"; tissue "lv|ce";
14	ncSplice	exon	84362733	84362875	.	-	.	gene_id "ENSMMUG00000019618"; transcript_id "rmCircRNA-184"; exon_number "6" gene_name "PICALM"; gene_biotype "protein_coding"; oId "lv:circPICALM-1868-005|ce:circPICALM-4224-002"; tissue "lv|ce";
14	ncSplice	gene	84353727	84362875	.	-	.	gene_id "ENSMMUG00000019618"; gene_name "PICALM"; gene_source "ncSplice"; gene_biotype "protein_coding";
14	ncSplice	transcript	84353727	84362875	.	-	.	gene_id "ENSMMUG00000019618"; transcript_id "rmCircRNA-185"; gene_name "PICALM"; gene_biotype "protein_coding"; transcript_biotype "circRNA"; oId "lv:circPICALM-1871-002|ce:circPICALM-4227-002"; tissue "lv|ce";
14	ncSplice	exon	84353727	84353829	.	-	.	gene_id "ENSMMUG00000019618"; transcript_id "rmCircRNA-185"; exon_number "1" gene_name "PICALM"; gene_biotype "protein_coding"; oId "lv:circPICALM-1871-002|ce:circPICALM-4227-002"; tissue "lv|ce";
14	ncSplice	exon	84357599	84357674	.	-	.	gene_id "ENSMMUG00000019618"; transcript_id "rmCircRNA-185"; exon_number "2" gene_name "PICALM"; gene_biotype "protein_coding"; oId "lv:circPICALM-1871-002|ce:circPICALM-4227-002"; tissue "lv|ce";
14	ncSplice	exon	84362733	84362875	.	-	.	gene_id "ENSMMUG00000019618"; transcript_id "rmCircRNA-185"; exon_number "3" gene_name "PICALM"; gene_biotype "protein_coding"; oId "lv:circPICALM-1871-002|ce:circPICALM-4227-002"; tissue "lv|ce";
15	ncSplice	gene	105230912	105236113	.	+	.	gene_id "ENSMMUG00000009493"; gene_name "FAM120A"; gene_source "ncSplice"; gene_biotype "protein_coding";
15	ncSplice	transcript	105230912	105236113	.	+	.	gene_id "ENSMMUG00000009493"; transcript_id "rmCircRNA-186"; gene_name "FAM120A"; gene_biotype "protein_coding"; transcript_biotype "circRNA"; oId "lv:circFAM120A-1906-001|ce:circFAM120A-4321-001"; tissue "lv|ce";
15	ncSplice	exon	105230912	105231158	.	+	.	gene_id "ENSMMUG00000009493"; transcript_id "rmCircRNA-186"; exon_number "1" gene_name "FAM120A"; gene_biotype "protein_coding"; oId "lv:circFAM120A-1906-001|ce:circFAM120A-4321-001"; tissue "lv|ce";
15	ncSplice	exon	105236031	105236113	.	+	.	gene_id "ENSMMUG00000009493"; transcript_id "rmCircRNA-186"; exon_number "2" gene_name "FAM120A"; gene_biotype "protein_coding"; oId "lv:circFAM120A-1906-001|ce:circFAM120A-4321-001"; tissue "lv|ce";
15	ncSplice	gene	105230912	105259565	.	+	.	gene_id "ENSMMUG00000009493"; gene_name "FAM120A"; gene_source "ncSplice"; gene_biotype "protein_coding";
15	ncSplice	transcript	105230912	105259565	.	+	.	gene_id "ENSMMUG00000009493"; transcript_id "rmCircRNA-187"; gene_name "FAM120A"; gene_biotype "protein_coding"; transcript_biotype "circRNA"; oId "lv:circFAM120A-1907-003"; tissue "lv";
15	ncSplice	exon	105230912	105231158	.	+	.	gene_id "ENSMMUG00000009493"; transcript_id "rmCircRNA-187"; exon_number "1" gene_name "FAM120A"; gene_biotype "protein_coding"; oId "lv:circFAM120A-1907-003"; tissue "lv";
15	ncSplice	exon	105236031	105236113	.	+	.	gene_id "ENSMMUG00000009493"; transcript_id "rmCircRNA-187"; exon_number "2" gene_name "FAM120A"; gene_biotype "protein_coding"; oId "lv:circFAM120A-1907-003"; tissue "lv";
15	ncSplice	exon	105258165	105258293	.	+	.	gene_id "ENSMMUG00000009493"; transcript_id "rmCircRNA-187"; exon_number "3" gene_name "FAM120A"; gene_biotype "protein_coding"; oId "lv:circFAM120A-1907-003"; tissue "lv";
15	ncSplice	exon	105259469	105259565	.	+	.	gene_id "ENSMMUG00000009493"; transcript_id "rmCircRNA-187"; exon_number "4" gene_name "FAM120A"; gene_biotype "protein_coding"; oId "lv:circFAM120A-1907-003"; tissue "lv";
15	ncSplice	gene	106872942	106888446	.	+	.	gene_id "ENSMMUG00000008298"; gene_name "C9orf3"; gene_source "ncSplice"; gene_biotype "protein_coding";
15	ncSplice	transcript	106872942	106888446	.	+	.	gene_id "ENSMMUG00000008298"; transcript_id "rmCircRNA-188"; gene_name "C9orf3"; gene_biotype "protein_coding"; transcript_biotype "circRNA"; oId "lv:circC9orf3-1917-002"; tissue "lv";
15	ncSplice	exon	106872942	106873058	.	+	.	gene_id "ENSMMUG00000008298"; transcript_id "rmCircRNA-188"; exon_number "1" gene_name "C9orf3"; gene_biotype "protein_coding"; oId "lv:circC9orf3-1917-002"; tissue "lv";
15	ncSplice	exon	106888242	106888446	.	+	.	gene_id "ENSMMUG00000008298"; transcript_id "rmCircRNA-188"; exon_number "2" gene_name "C9orf3"; gene_biotype "protein_coding"; oId "lv:circC9orf3-1917-002"; tissue "lv";
15	ncSplice	gene	106872942	106894716	.	+	.	gene_id "ENSMMUG00000008298"; gene_name "C9orf3"; gene_source "ncSplice"; gene_biotype "protein_coding";
15	ncSplice	transcript	106872942	106894716	.	+	.	gene_id "ENSMMUG00000008298"; transcript_id "rmCircRNA-189"; gene_name "C9orf3"; gene_biotype "protein_coding"; transcript_biotype "circRNA"; oId "lv:circC9orf3-1918-003"; tissue "lv";
15	ncSplice	exon	106872942	106873058	.	+	.	gene_id "ENSMMUG00000008298"; transcript_id "rmCircRNA-189"; exon_number "1" gene_name "C9orf3"; gene_biotype "protein_coding"; oId "lv:circC9orf3-1918-003"; tissue "lv";
15	ncSplice	exon	106888242	106888446	.	+	.	gene_id "ENSMMUG00000008298"; transcript_id "rmCircRNA-189"; exon_number "2" gene_name "C9orf3"; gene_biotype "protein_coding"; oId "lv:circC9orf3-1918-003"; tissue "lv";
15	ncSplice	exon	106894630	106894716	.	+	.	gene_id "ENSMMUG00000008298"; transcript_id "rmCircRNA-189"; exon_number "3" gene_name "C9orf3"; gene_biotype "protein_coding"; oId "lv:circC9orf3-1918-003"; tissue "lv";
15	ncSplice	gene	106872942	106896641	.	+	.	gene_id "ENSMMUG00000008298"; gene_name "C9orf3"; gene_source "ncSplice"; gene_biotype "protein_coding";
15	ncSplice	transcript	106872942	106896641	.	+	.	gene_id "ENSMMUG00000008298"; transcript_id "rmCircRNA-190"; gene_name "C9orf3"; gene_biotype "protein_coding"; transcript_biotype "circRNA"; oId "lv:circC9orf3-1919-003"; tissue "lv";
15	ncSplice	exon	106872942	106873058	.	+	.	gene_id "ENSMMUG00000008298"; transcript_id "rmCircRNA-190"; exon_number "1" gene_name "C9orf3"; gene_biotype "protein_coding"; oId "lv:circC9orf3-1919-003"; tissue "lv";
15	ncSplice	exon	106888242	106888446	.	+	.	gene_id "ENSMMUG00000008298"; transcript_id "rmCircRNA-190"; exon_number "2" gene_name "C9orf3"; gene_biotype "protein_coding"; oId "lv:circC9orf3-1919-003"; tissue "lv";
15	ncSplice	exon	106894630	106894716	.	+	.	gene_id "ENSMMUG00000008298"; transcript_id "rmCircRNA-190"; exon_number "3" gene_name "C9orf3"; gene_biotype "protein_coding"; oId "lv:circC9orf3-1919-003"; tissue "lv";
15	ncSplice	exon	106896497	106896641	.	+	.	gene_id "ENSMMUG00000008298"; transcript_id "rmCircRNA-190"; exon_number "4" gene_name "C9orf3"; gene_biotype "protein_coding"; oId "lv:circC9orf3-1919-003"; tissue "lv";
15	ncSplice	gene	107066942	107075499	.	-	.	gene_id "ENSMMUG00000008299"; gene_name "FANCC"; gene_source "ncSplice"; gene_biotype "protein_coding";
15	ncSplice	transcript	107066942	107075499	.	-	.	gene_id "ENSMMUG00000008299"; transcript_id "rmCircRNA-191"; gene_name "FANCC"; gene_biotype "protein_coding"; transcript_biotype "circRNA"; oId "lv:circFANCC-1923-001|ce:circFANCC-4344-001"; tissue "lv|ce";
15	ncSplice	exon	107066942	107067036	.	-	.	gene_id "ENSMMUG00000008299"; transcript_id "rmCircRNA-191"; exon_number "1" gene_name "FANCC"; gene_biotype "protein_coding"; oId "lv:circFANCC-1923-001|ce:circFANCC-4344-001"; tissue "lv|ce";
15	ncSplice	exon	107068659	107075499	.	-	.	gene_id "ENSMMUG00000008299"; transcript_id "rmCircRNA-191"; exon_number "2" gene_name "FANCC"; gene_biotype "protein_coding"; oId "lv:circFANCC-1923-001|ce:circFANCC-4344-001"; tissue "lv|ce";
15	ncSplice	gene	13705955	13717718	.	-	.	gene_id "ENSMMUG00000012882"; gene_name "MRRF"; gene_source "ncSplice"; gene_biotype "protein_coding";
15	ncSplice	transcript	13705955	13717718	.	-	.	gene_id "ENSMMUG00000012882"; transcript_id "rmCircRNA-192"; gene_name "MRRF"; gene_biotype "protein_coding"; transcript_biotype "circRNA"; oId "lv:circMRRF-1947-002|ce:circMRRF-4406-003"; tissue "lv|ce";
15	ncSplice	exon	13705955	13706046	.	-	.	gene_id "ENSMMUG00000012882"; transcript_id "rmCircRNA-192"; exon_number "1" gene_name "MRRF"; gene_biotype "protein_coding"; oId "lv:circMRRF-1947-002|ce:circMRRF-4406-003"; tissue "lv|ce";
15	ncSplice	exon	13711945	13712072	.	-	.	gene_id "ENSMMUG00000012882"; transcript_id "rmCircRNA-192"; exon_number "2" gene_name "MRRF"; gene_biotype "protein_coding"; oId "lv:circMRRF-1947-002|ce:circMRRF-4406-003"; tissue "lv|ce";
15	ncSplice	exon	13712827	13712945	.	-	.	gene_id "ENSMMUG00000012882"; transcript_id "rmCircRNA-192"; exon_number "3" gene_name "MRRF"; gene_biotype "protein_coding"; oId "lv:circMRRF-1947-002|ce:circMRRF-4406-003"; tissue "lv|ce";
15	ncSplice	exon	13717563	13717718	.	-	.	gene_id "ENSMMUG00000012882"; transcript_id "rmCircRNA-192"; exon_number "4" gene_name "MRRF"; gene_biotype "protein_coding"; oId "lv:circMRRF-1947-002|ce:circMRRF-4406-003"; tissue "lv|ce";
15	ncSplice	gene	15003987	15021904	.	+	.	gene_id "ENSMMUG00000020124"; gene_name "C5"; gene_source "ncSplice"; gene_biotype "protein_coding";
15	ncSplice	transcript	15003987	15021904	.	+	.	gene_id "ENSMMUG00000020124"; transcript_id "rmCircRNA-193"; gene_name "C5"; gene_biotype "protein_coding"; transcript_biotype "circRNA"; oId "lv:circC5-1961-001"; tissue "lv";
15	ncSplice	exon	15003987	15004214	.	+	.	gene_id "ENSMMUG00000020124"; transcript_id "rmCircRNA-193"; exon_number "1" gene_name "C5"; gene_biotype "protein_coding"; oId "lv:circC5-1961-001"; tissue "lv";
15	ncSplice	exon	15005445	15005626	.	+	.	gene_id "ENSMMUG00000020124"; transcript_id "rmCircRNA-193"; exon_number "2" gene_name "C5"; gene_biotype "protein_coding"; oId "lv:circC5-1961-001"; tissue "lv";
15	ncSplice	exon	15010136	15010205	.	+	.	gene_id "ENSMMUG00000020124"; transcript_id "rmCircRNA-193"; exon_number "3" gene_name "C5"; gene_biotype "protein_coding"; oId "lv:circC5-1961-001"; tissue "lv";
15	ncSplice	exon	15011934	15012146	.	+	.	gene_id "ENSMMUG00000020124"; transcript_id "rmCircRNA-193"; exon_number "4" gene_name "C5"; gene_biotype "protein_coding"; oId "lv:circC5-1961-001"; tissue "lv";
15	ncSplice	exon	15012593	15012668	.	+	.	gene_id "ENSMMUG00000020124"; transcript_id "rmCircRNA-193"; exon_number "5" gene_name "C5"; gene_biotype "protein_coding"; oId "lv:circC5-1961-001"; tissue "lv";
15	ncSplice	exon	15019504	15019663	.	+	.	gene_id "ENSMMUG00000020124"; transcript_id "rmCircRNA-193"; exon_number "6" gene_name "C5"; gene_biotype "protein_coding"; oId "lv:circC5-1961-001"; tissue "lv";
15	ncSplice	exon	15021068	15021612	.	+	.	gene_id "ENSMMUG00000020124"; transcript_id "rmCircRNA-193"; exon_number "7" gene_name "C5"; gene_biotype "protein_coding"; oId "lv:circC5-1961-001"; tissue "lv";
15	ncSplice	exon	15021733	15021904	.	+	.	gene_id "ENSMMUG00000020124"; transcript_id "rmCircRNA-193"; exon_number "8" gene_name "C5"; gene_biotype "protein_coding"; oId "lv:circC5-1961-001"; tissue "lv";
15	ncSplice	gene	15038319	15040926	.	+	.	gene_id "ENSMMUG00000020124"; gene_name "C5"; gene_source "ncSplice"; gene_biotype "protein_coding";
15	ncSplice	transcript	15038319	15040926	.	+	.	gene_id "ENSMMUG00000020124"; transcript_id "rmCircRNA-194"; gene_name "C5"; gene_biotype "protein_coding"; transcript_biotype "circRNA"; oId "lv:circC5-1965-001"; tissue "lv";
15	ncSplice	exon	15038319	15038615	.	+	.	gene_id "ENSMMUG00000020124"; transcript_id "rmCircRNA-194"; exon_number "1" gene_name "C5"; gene_biotype "protein_coding"; oId "lv:circC5-1965-001"; tissue "lv";
15	ncSplice	exon	15040837	15040926	.	+	.	gene_id "ENSMMUG00000020124"; transcript_id "rmCircRNA-194"; exon_number "2" gene_name "C5"; gene_biotype "protein_coding"; oId "lv:circC5-1965-001"; tissue "lv";
15	ncSplice	gene	15471891	15491417	.	+	.	gene_id "ENSMMUG00000023255"; gene_name "CDK5RAP2"; gene_source "ncSplice"; gene_biotype "protein_coding";
15	ncSplice	transcript	15471891	15491417	.	+	.	gene_id "ENSMMUG00000023255"; transcript_id "rmCircRNA-195"; gene_name "CDK5RAP2"; gene_biotype "protein_coding"; transcript_biotype "circRNA"; oId "lv:circCDK5RAP2-1968-001"; tissue "lv";
15	ncSplice	exon	15471891	15472014	.	+	.	gene_id "ENSMMUG00000023255"; transcript_id "rmCircRNA-195"; exon_number "1" gene_name "CDK5RAP2"; gene_biotype "protein_coding"; oId "lv:circCDK5RAP2-1968-001"; tissue "lv";
15	ncSplice	exon	15474529	15474683	.	+	.	gene_id "ENSMMUG00000023255"; transcript_id "rmCircRNA-195"; exon_number "2" gene_name "CDK5RAP2"; gene_biotype "protein_coding"; oId "lv:circCDK5RAP2-1968-001"; tissue "lv";
15	ncSplice	exon	15480479	15481874	.	+	.	gene_id "ENSMMUG00000023255"; transcript_id "rmCircRNA-195"; exon_number "3" gene_name "CDK5RAP2"; gene_biotype "protein_coding"; oId "lv:circCDK5RAP2-1968-001"; tissue "lv";
15	ncSplice	exon	15482691	15482972	.	+	.	gene_id "ENSMMUG00000023255"; transcript_id "rmCircRNA-195"; exon_number "4" gene_name "CDK5RAP2"; gene_biotype "protein_coding"; oId "lv:circCDK5RAP2-1968-001"; tissue "lv";
15	ncSplice	exon	15491129	15491417	.	+	.	gene_id "ENSMMUG00000023255"; transcript_id "rmCircRNA-195"; exon_number "5" gene_name "CDK5RAP2"; gene_biotype "protein_coding"; oId "lv:circCDK5RAP2-1968-001"; tissue "lv";
15	ncSplice	gene	22858863	22859904	.	-	.	gene_id "ENSMMUG00000011197"; gene_name "SLC31A1"; gene_source "ncSplice"; gene_biotype "protein_coding";
15	ncSplice	transcript	22858863	22859904	.	-	.	gene_id "ENSMMUG00000011197"; transcript_id "rmCircRNA-196"; gene_name "SLC31A1"; gene_biotype "protein_coding"; transcript_biotype "circRNA"; oId "lv:circSLC31A1-1973-001|ce:circSLC31A1-4435-001"; tissue "lv|ce";
15	ncSplice	exon	22858863	22858935	.	-	.	gene_id "ENSMMUG00000011197"; transcript_id "rmCircRNA-196"; exon_number "1" gene_name "SLC31A1"; gene_biotype "protein_coding"; oId "lv:circSLC31A1-1973-001|ce:circSLC31A1-4435-001"; tissue "lv|ce";
15	ncSplice	exon	22859741	22859904	.	-	.	gene_id "ENSMMUG00000011197"; transcript_id "rmCircRNA-196"; exon_number "2" gene_name "SLC31A1"; gene_biotype "protein_coding"; oId "lv:circSLC31A1-1973-001|ce:circSLC31A1-4435-001"; tissue "lv|ce";
15	ncSplice	gene	2445096	2446531	.	+	.	gene_id "ENSMMUG00000021497"; gene_name "CAMSAP1"; gene_source "ncSplice"; gene_biotype "protein_coding";
15	ncSplice	transcript	2445096	2446531	.	+	.	gene_id "ENSMMUG00000021497"; transcript_id "rmCircRNA-197"; gene_name "CAMSAP1"; gene_biotype "protein_coding"; transcript_biotype "circRNA"; oId "lv:circCAMSAP1-1978-001|ce:circCAMSAP1-4447-001|ts:circCAMSAP1-3529-001"; tissue "lv|ce|ts";
15	ncSplice	exon	2445096	2445358	.	+	.	gene_id "ENSMMUG00000021497"; transcript_id "rmCircRNA-197"; exon_number "1" gene_name "CAMSAP1"; gene_biotype "protein_coding"; oId "lv:circCAMSAP1-1978-001|ce:circCAMSAP1-4447-001|ts:circCAMSAP1-3529-001"; tissue "lv|ce|ts";
15	ncSplice	exon	2445503	2445654	.	+	.	gene_id "ENSMMUG00000021497"; transcript_id "rmCircRNA-197"; exon_number "2" gene_name "CAMSAP1"; gene_biotype "protein_coding"; oId "lv:circCAMSAP1-1978-001|ce:circCAMSAP1-4447-001|ts:circCAMSAP1-3529-001"; tissue "lv|ce|ts";
15	ncSplice	exon	2446372	2446531	.	+	.	gene_id "ENSMMUG00000021497"; transcript_id "rmCircRNA-197"; exon_number "3" gene_name "CAMSAP1"; gene_biotype "protein_coding"; oId "lv:circCAMSAP1-1978-001|ce:circCAMSAP1-4447-001|ts:circCAMSAP1-3529-001"; tissue "lv|ce|ts";
15	ncSplice	gene	28887589	28898539	.	-	.	gene_id "ENSMMUG00000014944"; gene_name "RAD23B"; gene_source "ncSplice"; gene_biotype "protein_coding";
15	ncSplice	transcript	28887589	28898539	.	-	.	gene_id "ENSMMUG00000014944"; transcript_id "rmCircRNA-198"; gene_name "RAD23B"; gene_biotype "protein_coding"; transcript_biotype "circRNA"; oId "lv:circRAD23B-1999-001|ce:circRAD23B-4501-001|ts:circRAD23B-3558-001"; tissue "lv|ce|ts";
15	ncSplice	exon	28887589	28887644	.	-	.	gene_id "ENSMMUG00000014944"; transcript_id "rmCircRNA-198"; exon_number "1" gene_name "RAD23B"; gene_biotype "protein_coding"; oId "lv:circRAD23B-1999-001|ce:circRAD23B-4501-001|ts:circRAD23B-3558-001"; tissue "lv|ce|ts";
15	ncSplice	exon	28892208	28892476	.	-	.	gene_id "ENSMMUG00000014944"; transcript_id "rmCircRNA-198"; exon_number "2" gene_name "RAD23B"; gene_biotype "protein_coding"; oId "lv:circRAD23B-1999-001|ce:circRAD23B-4501-001|ts:circRAD23B-3558-001"; tissue "lv|ce|ts";
15	ncSplice	exon	28896564	28896643	.	-	.	gene_id "ENSMMUG00000014944"; transcript_id "rmCircRNA-198"; exon_number "3" gene_name "RAD23B"; gene_biotype "protein_coding"; oId "lv:circRAD23B-1999-001|ce:circRAD23B-4501-001|ts:circRAD23B-3558-001"; tissue "lv|ce|ts";
15	ncSplice	exon	28898458	28898539	.	-	.	gene_id "ENSMMUG00000014944"; transcript_id "rmCircRNA-198"; exon_number "4" gene_name "RAD23B"; gene_biotype "protein_coding"; oId "lv:circRAD23B-1999-001|ce:circRAD23B-4501-001|ts:circRAD23B-3558-001"; tissue "lv|ce|ts";
15	ncSplice	gene	38530991	38540009	.	+	.	gene_id "ENSMMUG00000012282"; gene_name "XPA"; gene_source "ncSplice"; gene_biotype "protein_coding";
15	ncSplice	transcript	38530991	38540009	.	+	.	gene_id "ENSMMUG00000012282"; transcript_id "rmCircRNA-199"; gene_name "XPA"; gene_biotype "protein_coding"; transcript_biotype "circRNA"; oId "lv:circXPA-2016-001"; tissue "lv";
15	ncSplice	exon	38530991	38535385	.	+	.	gene_id "ENSMMUG00000012282"; transcript_id "rmCircRNA-199"; exon_number "1" gene_name "XPA"; gene_biotype "protein_coding"; oId "lv:circXPA-2016-001"; tissue "lv";
15	ncSplice	exon	38539892	38540009	.	+	.	gene_id "ENSMMUG00000012282"; transcript_id "rmCircRNA-199"; exon_number "2" gene_name "XPA"; gene_biotype "protein_coding"; oId "lv:circXPA-2016-001"; tissue "lv";
15	ncSplice	gene	43579845	43587120	.	+	.	gene_id "ENSMMUG00000012597"; gene_name "UBAP2"; gene_source "ncSplice"; gene_biotype "protein_coding";
15	ncSplice	transcript	43579845	43587120	.	+	.	gene_id "ENSMMUG00000012597"; transcript_id "rmCircRNA-200"; gene_name "UBAP2"; gene_biotype "protein_coding"; transcript_biotype "circRNA"; oId "lv:circUBAP2-2045-001"; tissue "lv";
15	ncSplice	exon	43579845	43580058	.	+	.	gene_id "ENSMMUG00000012597"; transcript_id "rmCircRNA-200"; exon_number "1" gene_name "UBAP2"; gene_biotype "protein_coding"; oId "lv:circUBAP2-2045-001"; tissue "lv";
15	ncSplice	exon	43584082	43584356	.	+	.	gene_id "ENSMMUG00000012597"; transcript_id "rmCircRNA-200"; exon_number "2" gene_name "UBAP2"; gene_biotype "protein_coding"; oId "lv:circUBAP2-2045-001"; tissue "lv";
15	ncSplice	exon	43585146	43585315	.	+	.	gene_id "ENSMMUG00000012597"; transcript_id "rmCircRNA-200"; exon_number "3" gene_name "UBAP2"; gene_biotype "protein_coding"; oId "lv:circUBAP2-2045-001"; tissue "lv";
15	ncSplice	exon	43586907	43587120	.	+	.	gene_id "ENSMMUG00000012597"; transcript_id "rmCircRNA-200"; exon_number "4" gene_name "UBAP2"; gene_biotype "protein_coding"; oId "lv:circUBAP2-2045-001"; tissue "lv";
15	ncSplice	gene	43873724	43874867	.	-	.	gene_id "15:43873723:43874867:-1"; gene_name "15:43873723:43874867:-1"; gene_source "ncSplice"; gene_biotype "novel";
15	ncSplice	transcript	43873724	43874867	.	-	.	gene_id "15:43873723:43874867:-1"; transcript_id "rmCircRNA-201"; gene_name "15:43873723:43874867:-1"; gene_biotype "novel"; transcript_biotype "circRNA"; oId "lv:circ15:43873723:43874867:-1-2050-001"; tissue "lv";
15	ncSplice	exon	43873724	43873797	.	-	.	gene_id "15:43873723:43874867:-1"; transcript_id "rmCircRNA-201"; exon_number "1" gene_name "15:43873723:43874867:-1"; gene_biotype "novel"; oId "lv:circ15:43873723:43874867:-1-2050-001"; tissue "lv";
15	ncSplice	exon	43874637	43874867	.	-	.	gene_id "15:43873723:43874867:-1"; transcript_id "rmCircRNA-201"; exon_number "2" gene_name "15:43873723:43874867:-1"; gene_biotype "novel"; oId "lv:circ15:43873723:43874867:-1-2050-001"; tissue "lv";
15	ncSplice	gene	50215199	50243797	.	+	.	gene_id "ENSMMUG00000006073"; gene_name "CAAP1"; gene_source "ncSplice"; gene_biotype "protein_coding";
15	ncSplice	transcript	50215199	50243797	.	+	.	gene_id "ENSMMUG00000006073"; transcript_id "rmCircRNA-202"; gene_name "CAAP1"; gene_biotype "protein_coding"; transcript_biotype "circRNA"; oId "lv:circCAAP1-2069-004|ce:circCAAP1-4636-004"; tissue "lv|ce";
15	ncSplice	exon	50215199	50215399	.	+	.	gene_id "ENSMMUG00000006073"; transcript_id "rmCircRNA-202"; exon_number "1" gene_name "CAAP1"; gene_biotype "protein_coding"; oId "lv:circCAAP1-2069-004|ce:circCAAP1-4636-004"; tissue "lv|ce";
15	ncSplice	exon	50216501	50216585	.	+	.	gene_id "ENSMMUG00000006073"; transcript_id "rmCircRNA-202"; exon_number "2" gene_name "CAAP1"; gene_biotype "protein_coding"; oId "lv:circCAAP1-2069-004|ce:circCAAP1-4636-004"; tissue "lv|ce";
15	ncSplice	exon	50217796	50217871	.	+	.	gene_id "ENSMMUG00000006073"; transcript_id "rmCircRNA-202"; exon_number "3" gene_name "CAAP1"; gene_biotype "protein_coding"; oId "lv:circCAAP1-2069-004|ce:circCAAP1-4636-004"; tissue "lv|ce";
15	ncSplice	exon	50243724	50243797	.	+	.	gene_id "ENSMMUG00000006073"; transcript_id "rmCircRNA-202"; exon_number "4" gene_name "CAAP1"; gene_biotype "protein_coding"; oId "lv:circCAAP1-2069-004|ce:circCAAP1-4636-004"; tissue "lv|ce";
15	ncSplice	gene	56251590	56282054	.	-	.	gene_id "ENSMMUG00000019070"; gene_name "FOCAD"; gene_source "ncSplice"; gene_biotype "protein_coding";
15	ncSplice	transcript	56251590	56282054	.	-	.	gene_id "ENSMMUG00000019070"; transcript_id "rmCircRNA-203"; gene_name "FOCAD"; gene_biotype "protein_coding"; transcript_biotype "circRNA"; oId "lv:circFOCAD-2076-001|ce:circFOCAD-4673-002"; tissue "lv|ce";
15	ncSplice	exon	56251590	56251694	.	-	.	gene_id "ENSMMUG00000019070"; transcript_id "rmCircRNA-203"; exon_number "1" gene_name "FOCAD"; gene_biotype "protein_coding"; oId "lv:circFOCAD-2076-001|ce:circFOCAD-4673-002"; tissue "lv|ce";
15	ncSplice	exon	56276945	56277099	.	-	.	gene_id "ENSMMUG00000019070"; transcript_id "rmCircRNA-203"; exon_number "2" gene_name "FOCAD"; gene_biotype "protein_coding"; oId "lv:circFOCAD-2076-001|ce:circFOCAD-4673-002"; tissue "lv|ce";
15	ncSplice	exon	56279195	56279269	.	-	.	gene_id "ENSMMUG00000019070"; transcript_id "rmCircRNA-203"; exon_number "3" gene_name "FOCAD"; gene_biotype "protein_coding"; oId "lv:circFOCAD-2076-001|ce:circFOCAD-4673-002"; tissue "lv|ce";
15	ncSplice	exon	56282000	56282054	.	-	.	gene_id "ENSMMUG00000019070"; transcript_id "rmCircRNA-203"; exon_number "4" gene_name "FOCAD"; gene_biotype "protein_coding"; oId "lv:circFOCAD-2076-001|ce:circFOCAD-4673-002"; tissue "lv|ce";
15	ncSplice	gene	70254796	70294978	.	-	.	gene_id "ENSMMUG00000015985"; gene_name "NA"; gene_source "ncSplice"; gene_biotype "protein_coding";
15	ncSplice	transcript	70254796	70294978	.	-	.	gene_id "ENSMMUG00000015985"; transcript_id "rmCircRNA-204"; gene_name "NA"; gene_biotype "protein_coding"; transcript_biotype "circRNA"; oId "lv:circNA-2106-001|ce:circNA-4752-001"; tissue "lv|ce";
15	ncSplice	exon	70254796	70254933	.	-	.	gene_id "ENSMMUG00000015985"; transcript_id "rmCircRNA-204"; exon_number "1" gene_name "NA"; gene_biotype "protein_coding"; oId "lv:circNA-2106-001|ce:circNA-4752-001"; tissue "lv|ce";
15	ncSplice	exon	70259139	70259242	.	-	.	gene_id "ENSMMUG00000015985"; transcript_id "rmCircRNA-204"; exon_number "2" gene_name "NA"; gene_biotype "protein_coding"; oId "lv:circNA-2106-001|ce:circNA-4752-001"; tissue "lv|ce";
15	ncSplice	exon	70267549	70294448	.	-	.	gene_id "ENSMMUG00000015985"; transcript_id "rmCircRNA-204"; exon_number "3" gene_name "NA"; gene_biotype "protein_coding"; oId "lv:circNA-2106-001|ce:circNA-4752-001"; tissue "lv|ce";
15	ncSplice	exon	70294791	70294978	.	-	.	gene_id "ENSMMUG00000015985"; transcript_id "rmCircRNA-204"; exon_number "4" gene_name "NA"; gene_biotype "protein_coding"; oId "lv:circNA-2106-001|ce:circNA-4752-001"; tissue "lv|ce";
15	ncSplice	gene	7260990	7263025	.	-	.	gene_id "ENSMMUG00000009973"; gene_name "PRRC2B"; gene_source "ncSplice"; gene_biotype "protein_coding";
15	ncSplice	transcript	7260990	7263025	.	-	.	gene_id "ENSMMUG00000009973"; transcript_id "rmCircRNA-205"; gene_name "PRRC2B"; gene_biotype "protein_coding"; transcript_biotype "circRNA"; oId "lv:circPRRC2B-2115-001|ce:circPRRC2B-4773-001|ts:circPRRC2B-3793-001"; tissue "lv|ce|ts";
15	ncSplice	exon	7260990	7261167	.	-	.	gene_id "ENSMMUG00000009973"; transcript_id "rmCircRNA-205"; exon_number "1" gene_name "PRRC2B"; gene_biotype "protein_coding"; oId "lv:circPRRC2B-2115-001|ce:circPRRC2B-4773-001|ts:circPRRC2B-3793-001"; tissue "lv|ce|ts";
15	ncSplice	exon	7262856	7263025	.	-	.	gene_id "ENSMMUG00000009973"; transcript_id "rmCircRNA-205"; exon_number "2" gene_name "PRRC2B"; gene_biotype "protein_coding"; oId "lv:circPRRC2B-2115-001|ce:circPRRC2B-4773-001|ts:circPRRC2B-3793-001"; tissue "lv|ce|ts";
15	ncSplice	gene	83800053	83801241	.	-	.	gene_id "ENSMMUG00000010399"; gene_name "C9ORF41"; gene_source "ncSplice"; gene_biotype "protein_coding";
15	ncSplice	transcript	83800053	83801241	.	-	.	gene_id "ENSMMUG00000010399"; transcript_id "rmCircRNA-206"; gene_name "C9ORF41"; gene_biotype "protein_coding"; transcript_biotype "circRNA"; oId "lv:circC9ORF41-2149-002|ce:circC9ORF41-4831-002|ts:circC9ORF41-3838-002"; tissue "lv|ce|ts";
15	ncSplice	exon	83800053	83800216	.	-	.	gene_id "ENSMMUG00000010399"; transcript_id "rmCircRNA-206"; exon_number "1" gene_name "C9ORF41"; gene_biotype "protein_coding"; oId "lv:circC9ORF41-2149-002|ce:circC9ORF41-4831-002|ts:circC9ORF41-3838-002"; tissue "lv|ce|ts";
15	ncSplice	exon	83801046	83801241	.	-	.	gene_id "ENSMMUG00000010399"; transcript_id "rmCircRNA-206"; exon_number "2" gene_name "C9ORF41"; gene_biotype "protein_coding"; oId "lv:circC9ORF41-2149-002|ce:circC9ORF41-4831-002|ts:circC9ORF41-3838-002"; tissue "lv|ce|ts";
1	ncSplice	gene	59656268	59661908	.	-	.	gene_id "ENSMMUG00000010408"; gene_name "C1orf168"; gene_source "ncSplice"; gene_biotype "protein_coding";
1	ncSplice	transcript	59656268	59661908	.	-	.	gene_id "ENSMMUG00000010408"; transcript_id "rmCircRNA-207"; gene_name "C1orf168"; gene_biotype "protein_coding"; transcript_biotype "circRNA"; oId "lv:circC1orf168-2170-001"; tissue "lv";
1	ncSplice	exon	59656268	59656301	.	-	.	gene_id "ENSMMUG00000010408"; transcript_id "rmCircRNA-207"; exon_number "1" gene_name "C1orf168"; gene_biotype "protein_coding"; oId "lv:circC1orf168-2170-001"; tissue "lv";
1	ncSplice	exon	59658062	59658223	.	-	.	gene_id "ENSMMUG00000010408"; transcript_id "rmCircRNA-207"; exon_number "2" gene_name "C1orf168"; gene_biotype "protein_coding"; oId "lv:circC1orf168-2170-001"; tissue "lv";
1	ncSplice	exon	59661161	59661908	.	-	.	gene_id "ENSMMUG00000010408"; transcript_id "rmCircRNA-207"; exon_number "3" gene_name "C1orf168"; gene_biotype "protein_coding"; oId "lv:circC1orf168-2170-001"; tissue "lv";
1	ncSplice	gene	59742564	59753622	.	+	.	gene_id "ENSMMUG00000022992"; gene_name "C8A"; gene_source "ncSplice"; gene_biotype "protein_coding";
1	ncSplice	transcript	59742564	59753622	.	+	.	gene_id "ENSMMUG00000022992"; transcript_id "rmCircRNA-208"; gene_name "C8A"; gene_biotype "protein_coding"; transcript_biotype "circRNA"; oId "lv:circC8A-2173-020"; tissue "lv";
1	ncSplice	exon	59742564	59742708	.	+	.	gene_id "ENSMMUG00000022992"; transcript_id "rmCircRNA-208"; exon_number "1" gene_name "C8A"; gene_biotype "protein_coding"; oId "lv:circC8A-2173-020"; tissue "lv";
1	ncSplice	exon	59743696	59743804	.	+	.	gene_id "ENSMMUG00000022992"; transcript_id "rmCircRNA-208"; exon_number "2" gene_name "C8A"; gene_biotype "protein_coding"; oId "lv:circC8A-2173-020"; tissue "lv";
1	ncSplice	exon	59749080	59749269	.	+	.	gene_id "ENSMMUG00000022992"; transcript_id "rmCircRNA-208"; exon_number "3" gene_name "C8A"; gene_biotype "protein_coding"; oId "lv:circC8A-2173-020"; tissue "lv";
1	ncSplice	exon	59751082	59751282	.	+	.	gene_id "ENSMMUG00000022992"; transcript_id "rmCircRNA-208"; exon_number "4" gene_name "C8A"; gene_biotype "protein_coding"; oId "lv:circC8A-2173-020"; tissue "lv";
1	ncSplice	exon	59753382	59753622	.	+	.	gene_id "ENSMMUG00000022992"; transcript_id "rmCircRNA-208"; exon_number "5" gene_name "C8A"; gene_biotype "protein_coding"; oId "lv:circC8A-2173-020"; tissue "lv";
15	ncSplice	gene	9746891	9747574	.	+	.	gene_id "ENSMMUG00000011767"; gene_name "CRAT"; gene_source "ncSplice"; gene_biotype "protein_coding";
15	ncSplice	transcript	9746891	9747574	.	+	.	gene_id "ENSMMUG00000011767"; transcript_id "rmCircRNA-209"; gene_name "CRAT"; gene_biotype "protein_coding"; transcript_biotype "circRNA"; oId "lv:circCRAT-2174-001"; tissue "lv";
15	ncSplice	exon	9746891	9747056	.	+	.	gene_id "ENSMMUG00000011767"; transcript_id "rmCircRNA-209"; exon_number "1" gene_name "CRAT"; gene_biotype "protein_coding"; oId "lv:circCRAT-2174-001"; tissue "lv";
15	ncSplice	exon	9747449	9747574	.	+	.	gene_id "ENSMMUG00000011767"; transcript_id "rmCircRNA-209"; exon_number "2" gene_name "CRAT"; gene_biotype "protein_coding"; oId "lv:circCRAT-2174-001"; tissue "lv";
16	ncSplice	gene	11803158	11842999	.	+	.	gene_id "ENSMMUG00000019842"; gene_name "MAP2K4"; gene_source "ncSplice"; gene_biotype "protein_coding";
16	ncSplice	transcript	11803158	11842999	.	+	.	gene_id "ENSMMUG00000019842"; transcript_id "rmCircRNA-210"; gene_name "MAP2K4"; gene_biotype "protein_coding"; transcript_biotype "circRNA"; oId "lv:circMAP2K4-2181-006|ce:circMAP2K4-4928-007|ts:circMAP2K4-3924-025"; tissue "lv|ce|ts";
16	ncSplice	exon	11803158	11803260	.	+	.	gene_id "ENSMMUG00000019842"; transcript_id "rmCircRNA-210"; exon_number "1" gene_name "MAP2K4"; gene_biotype "protein_coding"; oId "lv:circMAP2K4-2181-006|ce:circMAP2K4-4928-007|ts:circMAP2K4-3924-025"; tissue "lv|ce|ts";
16	ncSplice	exon	11829262	11829436	.	+	.	gene_id "ENSMMUG00000019842"; transcript_id "rmCircRNA-210"; exon_number "2" gene_name "MAP2K4"; gene_biotype "protein_coding"; oId "lv:circMAP2K4-2181-006|ce:circMAP2K4-4928-007|ts:circMAP2K4-3924-025"; tissue "lv|ce|ts";
16	ncSplice	exon	11842880	11842999	.	+	.	gene_id "ENSMMUG00000019842"; transcript_id "rmCircRNA-210"; exon_number "3" gene_name "MAP2K4"; gene_biotype "protein_coding"; oId "lv:circMAP2K4-2181-006|ce:circMAP2K4-4928-007|ts:circMAP2K4-3924-025"; tissue "lv|ce|ts";
16	ncSplice	gene	11803158	11860858	.	+	.	gene_id "ENSMMUG00000019842"; gene_name "MAP2K4"; gene_source "ncSplice"; gene_biotype "protein_coding";
16	ncSplice	transcript	11803158	11860858	.	+	.	gene_id "ENSMMUG00000019842"; transcript_id "rmCircRNA-211"; gene_name "MAP2K4"; gene_biotype "protein_coding"; transcript_biotype "circRNA"; oId "lv:circMAP2K4-2182-030|ce:circMAP2K4-4931-051|ts:circMAP2K4-3925-100"; tissue "lv|ce|ts";
16	ncSplice	exon	11803158	11803260	.	+	.	gene_id "ENSMMUG00000019842"; transcript_id "rmCircRNA-211"; exon_number "1" gene_name "MAP2K4"; gene_biotype "protein_coding"; oId "lv:circMAP2K4-2182-030|ce:circMAP2K4-4931-051|ts:circMAP2K4-3925-100"; tissue "lv|ce|ts";
16	ncSplice	exon	11829262	11829436	.	+	.	gene_id "ENSMMUG00000019842"; transcript_id "rmCircRNA-211"; exon_number "2" gene_name "MAP2K4"; gene_biotype "protein_coding"; oId "lv:circMAP2K4-2182-030|ce:circMAP2K4-4931-051|ts:circMAP2K4-3925-100"; tissue "lv|ce|ts";
16	ncSplice	exon	11842880	11842999	.	+	.	gene_id "ENSMMUG00000019842"; transcript_id "rmCircRNA-211"; exon_number "3" gene_name "MAP2K4"; gene_biotype "protein_coding"; oId "lv:circMAP2K4-2182-030|ce:circMAP2K4-4931-051|ts:circMAP2K4-3925-100"; tissue "lv|ce|ts";
16	ncSplice	exon	11855271	11855390	.	+	.	gene_id "ENSMMUG00000019842"; transcript_id "rmCircRNA-211"; exon_number "4" gene_name "MAP2K4"; gene_biotype "protein_coding"; oId "lv:circMAP2K4-2182-030|ce:circMAP2K4-4931-051|ts:circMAP2K4-3925-100"; tissue "lv|ce|ts";
16	ncSplice	exon	11857855	11857906	.	+	.	gene_id "ENSMMUG00000019842"; transcript_id "rmCircRNA-211"; exon_number "5" gene_name "MAP2K4"; gene_biotype "protein_coding"; oId "lv:circMAP2K4-2182-030|ce:circMAP2K4-4931-051|ts:circMAP2K4-3925-100"; tissue "lv|ce|ts";
16	ncSplice	exon	11860731	11860858	.	+	.	gene_id "ENSMMUG00000019842"; transcript_id "rmCircRNA-211"; exon_number "6" gene_name "MAP2K4"; gene_biotype "protein_coding"; oId "lv:circMAP2K4-2182-030|ce:circMAP2K4-4931-051|ts:circMAP2K4-3925-100"; tissue "lv|ce|ts";
1	ncSplice	gene	61352822	61391290	.	-	.	gene_id "ENSMMUG00000022762"; gene_name "OMA1"; gene_source "ncSplice"; gene_biotype "protein_coding";
1	ncSplice	transcript	61352822	61391290	.	-	.	gene_id "ENSMMUG00000022762"; transcript_id "rmCircRNA-212"; gene_name "OMA1"; gene_biotype "protein_coding"; transcript_biotype "circRNA"; oId "lv:circOMA1-2188-017"; tissue "lv";
1	ncSplice	exon	61352822	61352971	.	-	.	gene_id "ENSMMUG00000022762"; transcript_id "rmCircRNA-212"; exon_number "1" gene_name "OMA1"; gene_biotype "protein_coding"; oId "lv:circOMA1-2188-017"; tissue "lv";
1	ncSplice	exon	61381230	61381304	.	-	.	gene_id "ENSMMUG00000022762"; transcript_id "rmCircRNA-212"; exon_number "2" gene_name "OMA1"; gene_biotype "protein_coding"; oId "lv:circOMA1-2188-017"; tissue "lv";
1	ncSplice	exon	61384268	61384396	.	-	.	gene_id "ENSMMUG00000022762"; transcript_id "rmCircRNA-212"; exon_number "3" gene_name "OMA1"; gene_biotype "protein_coding"; oId "lv:circOMA1-2188-017"; tissue "lv";
1	ncSplice	exon	61387614	61387721	.	-	.	gene_id "ENSMMUG00000022762"; transcript_id "rmCircRNA-212"; exon_number "4" gene_name "OMA1"; gene_biotype "protein_coding"; oId "lv:circOMA1-2188-017"; tissue "lv";
1	ncSplice	exon	61387819	61387992	.	-	.	gene_id "ENSMMUG00000022762"; transcript_id "rmCircRNA-212"; exon_number "5" gene_name "OMA1"; gene_biotype "protein_coding"; oId "lv:circOMA1-2188-017"; tissue "lv";
1	ncSplice	exon	61391062	61391290	.	-	.	gene_id "ENSMMUG00000022762"; transcript_id "rmCircRNA-212"; exon_number "6" gene_name "OMA1"; gene_biotype "protein_coding"; oId "lv:circOMA1-2188-017"; tissue "lv";
1	ncSplice	gene	61381230	61391290	.	-	.	gene_id "ENSMMUG00000022762"; gene_name "OMA1"; gene_source "ncSplice"; gene_biotype "protein_coding";
1	ncSplice	transcript	61381230	61391290	.	-	.	gene_id "ENSMMUG00000022762"; transcript_id "rmCircRNA-213"; gene_name "OMA1"; gene_biotype "protein_coding"; transcript_biotype "circRNA"; oId "lv:circOMA1-2190-008"; tissue "lv";
1	ncSplice	exon	61381230	61381304	.	-	.	gene_id "ENSMMUG00000022762"; transcript_id "rmCircRNA-213"; exon_number "1" gene_name "OMA1"; gene_biotype "protein_coding"; oId "lv:circOMA1-2190-008"; tissue "lv";
1	ncSplice	exon	61384268	61384396	.	-	.	gene_id "ENSMMUG00000022762"; transcript_id "rmCircRNA-213"; exon_number "2" gene_name "OMA1"; gene_biotype "protein_coding"; oId "lv:circOMA1-2190-008"; tissue "lv";
1	ncSplice	exon	61387614	61387721	.	-	.	gene_id "ENSMMUG00000022762"; transcript_id "rmCircRNA-213"; exon_number "3" gene_name "OMA1"; gene_biotype "protein_coding"; oId "lv:circOMA1-2190-008"; tissue "lv";
1	ncSplice	exon	61387819	61387992	.	-	.	gene_id "ENSMMUG00000022762"; transcript_id "rmCircRNA-213"; exon_number "4" gene_name "OMA1"; gene_biotype "protein_coding"; oId "lv:circOMA1-2190-008"; tissue "lv";
1	ncSplice	exon	61391062	61391290	.	-	.	gene_id "ENSMMUG00000022762"; transcript_id "rmCircRNA-213"; exon_number "5" gene_name "OMA1"; gene_biotype "protein_coding"; oId "lv:circOMA1-2190-008"; tissue "lv";
16	ncSplice	gene	1437499	1437852	.	-	.	gene_id "ENSMMUG00000002376"; gene_name "NA"; gene_source "ncSplice"; gene_biotype "protein_coding";
16	ncSplice	transcript	1437499	1437852	.	-	.	gene_id "ENSMMUG00000002376"; transcript_id "rmCircRNA-214"; gene_name "NA"; gene_biotype "protein_coding"; transcript_biotype "circRNA"; oId "lv:circNA-2193-001"; tissue "lv";
16	ncSplice	exon	1437499	1437645	.	-	.	gene_id "ENSMMUG00000002376"; transcript_id "rmCircRNA-214"; exon_number "1" gene_name "NA"; gene_biotype "protein_coding"; oId "lv:circNA-2193-001"; tissue "lv";
16	ncSplice	exon	1437731	1437852	.	-	.	gene_id "ENSMMUG00000002376"; transcript_id "rmCircRNA-214"; exon_number "2" gene_name "NA"; gene_biotype "protein_coding"; oId "lv:circNA-2193-001"; tissue "lv";
16	ncSplice	gene	1437499	1438181	.	-	.	gene_id "ENSMMUG00000002376"; gene_name "NA"; gene_source "ncSplice"; gene_biotype "protein_coding";
16	ncSplice	transcript	1437499	1438181	.	-	.	gene_id "ENSMMUG00000002376"; transcript_id "rmCircRNA-215"; gene_name "NA"; gene_biotype "protein_coding"; transcript_biotype "circRNA"; oId "lv:circNA-2194-001"; tissue "lv";
16	ncSplice	exon	1437499	1437645	.	-	.	gene_id "ENSMMUG00000002376"; transcript_id "rmCircRNA-215"; exon_number "1" gene_name "NA"; gene_biotype "protein_coding"; oId "lv:circNA-2194-001"; tissue "lv";
16	ncSplice	exon	1437731	1438181	.	-	.	gene_id "ENSMMUG00000002376"; transcript_id "rmCircRNA-215"; exon_number "2" gene_name "NA"; gene_biotype "protein_coding"; oId "lv:circNA-2194-001"; tissue "lv";
1	ncSplice	gene	62179549	62228549	.	+	.	gene_id "ENSMMUG00000002387"; gene_name "FGGY"; gene_source "ncSplice"; gene_biotype "protein_coding";
1	ncSplice	transcript	62179549	62228549	.	+	.	gene_id "ENSMMUG00000002387"; transcript_id "rmCircRNA-216"; gene_name "FGGY"; gene_biotype "protein_coding"; transcript_biotype "circRNA"; oId "lv:circFGGY-2218-009|ce:circFGGY-5004-010"; tissue "lv|ce";
1	ncSplice	exon	62179549	62179763	.	+	.	gene_id "ENSMMUG00000002387"; transcript_id "rmCircRNA-216"; exon_number "1" gene_name "FGGY"; gene_biotype "protein_coding"; oId "lv:circFGGY-2218-009|ce:circFGGY-5004-010"; tissue "lv|ce";
1	ncSplice	exon	62198191	62198302	.	+	.	gene_id "ENSMMUG00000002387"; transcript_id "rmCircRNA-216"; exon_number "2" gene_name "FGGY"; gene_biotype "protein_coding"; oId "lv:circFGGY-2218-009|ce:circFGGY-5004-010"; tissue "lv|ce";
1	ncSplice	exon	62203674	62203825	.	+	.	gene_id "ENSMMUG00000002387"; transcript_id "rmCircRNA-216"; exon_number "3" gene_name "FGGY"; gene_biotype "protein_coding"; oId "lv:circFGGY-2218-009|ce:circFGGY-5004-010"; tissue "lv|ce";
1	ncSplice	exon	62228461	62228549	.	+	.	gene_id "ENSMMUG00000002387"; transcript_id "rmCircRNA-216"; exon_number "4" gene_name "FGGY"; gene_biotype "protein_coding"; oId "lv:circFGGY-2218-009|ce:circFGGY-5004-010"; tissue "lv|ce";
1	ncSplice	gene	62198191	62228549	.	+	.	gene_id "ENSMMUG00000002387"; gene_name "FGGY"; gene_source "ncSplice"; gene_biotype "protein_coding";
1	ncSplice	transcript	62198191	62228549	.	+	.	gene_id "ENSMMUG00000002387"; transcript_id "rmCircRNA-217"; gene_name "FGGY"; gene_biotype "protein_coding"; transcript_biotype "circRNA"; oId "lv:circFGGY-2220-003|ce:circFGGY-5006-002|ts:circFGGY-3983-002"; tissue "lv|ce|ts";
1	ncSplice	exon	62198191	62198302	.	+	.	gene_id "ENSMMUG00000002387"; transcript_id "rmCircRNA-217"; exon_number "1" gene_name "FGGY"; gene_biotype "protein_coding"; oId "lv:circFGGY-2220-003|ce:circFGGY-5006-002|ts:circFGGY-3983-002"; tissue "lv|ce|ts";
1	ncSplice	exon	62203674	62203825	.	+	.	gene_id "ENSMMUG00000002387"; transcript_id "rmCircRNA-217"; exon_number "2" gene_name "FGGY"; gene_biotype "protein_coding"; oId "lv:circFGGY-2220-003|ce:circFGGY-5006-002|ts:circFGGY-3983-002"; tissue "lv|ce|ts";
1	ncSplice	exon	62228461	62228549	.	+	.	gene_id "ENSMMUG00000002387"; transcript_id "rmCircRNA-217"; exon_number "3" gene_name "FGGY"; gene_biotype "protein_coding"; oId "lv:circFGGY-2220-003|ce:circFGGY-5006-002|ts:circFGGY-3983-002"; tissue "lv|ce|ts";
16	ncSplice	gene	27188515	27193758	.	+	.	gene_id "ENSMMUG00000001116"; gene_name "SUZ12"; gene_source "ncSplice"; gene_biotype "protein_coding";
16	ncSplice	transcript	27188515	27193758	.	+	.	gene_id "ENSMMUG00000001116"; transcript_id "rmCircRNA-218"; gene_name "SUZ12"; gene_biotype "protein_coding"; transcript_biotype "circRNA"; oId "lv:circSUZ12-2238-001|ce:circSUZ12-5058-001|ts:circSUZ12-4017-001"; tissue "lv|ce|ts";
16	ncSplice	exon	27188515	27188620	.	+	.	gene_id "ENSMMUG00000001116"; transcript_id "rmCircRNA-218"; exon_number "1" gene_name "SUZ12"; gene_biotype "protein_coding"; oId "lv:circSUZ12-2238-001|ce:circSUZ12-5058-001|ts:circSUZ12-4017-001"; tissue "lv|ce|ts";
16	ncSplice	exon	27193581	27193758	.	+	.	gene_id "ENSMMUG00000001116"; transcript_id "rmCircRNA-218"; exon_number "2" gene_name "SUZ12"; gene_biotype "protein_coding"; oId "lv:circSUZ12-2238-001|ce:circSUZ12-5058-001|ts:circSUZ12-4017-001"; tissue "lv|ce|ts";
16	ncSplice	gene	33541990	33543548	.	-	.	gene_id "ENSMMUG00000003453"; gene_name "ZNF652"; gene_source "ncSplice"; gene_biotype "protein_coding";
16	ncSplice	transcript	33541990	33543548	.	-	.	gene_id "ENSMMUG00000003453"; transcript_id "rmCircRNA-219"; gene_name "ZNF652"; gene_biotype "protein_coding"; transcript_biotype "circRNA"; oId "lv:circZNF652-2255-001|ce:circZNF652-5111-001"; tissue "lv|ce";
16	ncSplice	exon	33541990	33542134	.	-	.	gene_id "ENSMMUG00000003453"; transcript_id "rmCircRNA-219"; exon_number "1" gene_name "ZNF652"; gene_biotype "protein_coding"; oId "lv:circZNF652-2255-001|ce:circZNF652-5111-001"; tissue "lv|ce";
16	ncSplice	exon	33542632	33542747	.	-	.	gene_id "ENSMMUG00000003453"; transcript_id "rmCircRNA-219"; exon_number "2" gene_name "ZNF652"; gene_biotype "protein_coding"; oId "lv:circZNF652-2255-001|ce:circZNF652-5111-001"; tissue "lv|ce";
16	ncSplice	exon	33543401	33543548	.	-	.	gene_id "ENSMMUG00000003453"; transcript_id "rmCircRNA-219"; exon_number "3" gene_name "ZNF652"; gene_biotype "protein_coding"; oId "lv:circZNF652-2255-001|ce:circZNF652-5111-001"; tissue "lv|ce";
16	ncSplice	gene	35219905	35222863	.	-	.	gene_id "ENSMMUG00000022528"; gene_name "SPAG9"; gene_source "ncSplice"; gene_biotype "protein_coding";
16	ncSplice	transcript	35219905	35222863	.	-	.	gene_id "ENSMMUG00000022528"; transcript_id "rmCircRNA-220"; gene_name "SPAG9"; gene_biotype "protein_coding"; transcript_biotype "circRNA"; oId "lv:circSPAG9-2258-001|ce:circSPAG9-5122-001|ts:circSPAG9-4066-001"; tissue "lv|ce|ts";
16	ncSplice	exon	35219905	35220053	.	-	.	gene_id "ENSMMUG00000022528"; transcript_id "rmCircRNA-220"; exon_number "1" gene_name "SPAG9"; gene_biotype "protein_coding"; oId "lv:circSPAG9-2258-001|ce:circSPAG9-5122-001|ts:circSPAG9-4066-001"; tissue "lv|ce|ts";
16	ncSplice	exon	35222007	35222074	.	-	.	gene_id "ENSMMUG00000022528"; transcript_id "rmCircRNA-220"; exon_number "2" gene_name "SPAG9"; gene_biotype "protein_coding"; oId "lv:circSPAG9-2258-001|ce:circSPAG9-5122-001|ts:circSPAG9-4066-001"; tissue "lv|ce|ts";
16	ncSplice	exon	35222783	35222863	.	-	.	gene_id "ENSMMUG00000022528"; transcript_id "rmCircRNA-220"; exon_number "3" gene_name "SPAG9"; gene_biotype "protein_coding"; oId "lv:circSPAG9-2258-001|ce:circSPAG9-5122-001|ts:circSPAG9-4066-001"; tissue "lv|ce|ts";
16	ncSplice	gene	35437960	35439313	.	-	.	gene_id "ENSMMUG00000001942"; gene_name "MBTD1"; gene_source "ncSplice"; gene_biotype "protein_coding";
16	ncSplice	transcript	35437960	35439313	.	-	.	gene_id "ENSMMUG00000001942"; transcript_id "rmCircRNA-221"; gene_name "MBTD1"; gene_biotype "protein_coding"; transcript_biotype "circRNA"; oId "lv:circMBTD1-2264-001|ts:circMBTD1-4082-001"; tissue "lv|ts";
16	ncSplice	exon	35437960	35438064	.	-	.	gene_id "ENSMMUG00000001942"; transcript_id "rmCircRNA-221"; exon_number "1" gene_name "MBTD1"; gene_biotype "protein_coding"; oId "lv:circMBTD1-2264-001|ts:circMBTD1-4082-001"; tissue "lv|ts";
16	ncSplice	exon	35438390	35438445	.	-	.	gene_id "ENSMMUG00000001942"; transcript_id "rmCircRNA-221"; exon_number "2" gene_name "MBTD1"; gene_biotype "protein_coding"; oId "lv:circMBTD1-2264-001|ts:circMBTD1-4082-001"; tissue "lv|ts";
16	ncSplice	exon	35439079	35439313	.	-	.	gene_id "ENSMMUG00000001942"; transcript_id "rmCircRNA-221"; exon_number "3" gene_name "MBTD1"; gene_biotype "protein_coding"; oId "lv:circMBTD1-2264-001|ts:circMBTD1-4082-001"; tissue "lv|ts";
16	ncSplice	gene	43976979	44059137	.	+	.	gene_id "ENSMMUG00000001741"; gene_name "TMEM49"; gene_source "ncSplice"; gene_biotype "protein_coding";
16	ncSplice	transcript	43976979	44059137	.	+	.	gene_id "ENSMMUG00000001741"; transcript_id "rmCircRNA-222"; gene_name "TMEM49"; gene_biotype "protein_coding"; transcript_biotype "circRNA"; oId "lv:circTMEM49-2294-002|ts:circTMEM49-4174-001"; tissue "lv|ts";
16	ncSplice	exon	43976979	43977069	.	+	.	gene_id "ENSMMUG00000001741"; transcript_id "rmCircRNA-222"; exon_number "1" gene_name "TMEM49"; gene_biotype "protein_coding"; oId "lv:circTMEM49-2294-002|ts:circTMEM49-4174-001"; tissue "lv|ts";
16	ncSplice	exon	43978306	43978416	.	+	.	gene_id "ENSMMUG00000001741"; transcript_id "rmCircRNA-222"; exon_number "2" gene_name "TMEM49"; gene_biotype "protein_coding"; oId "lv:circTMEM49-2294-002|ts:circTMEM49-4174-001"; tissue "lv|ts";
16	ncSplice	exon	44003279	44003446	.	+	.	gene_id "ENSMMUG00000001741"; transcript_id "rmCircRNA-222"; exon_number "3" gene_name "TMEM49"; gene_biotype "protein_coding"; oId "lv:circTMEM49-2294-002|ts:circTMEM49-4174-001"; tissue "lv|ts";
16	ncSplice	exon	44013273	44013404	.	+	.	gene_id "ENSMMUG00000001741"; transcript_id "rmCircRNA-222"; exon_number "4" gene_name "TMEM49"; gene_biotype "protein_coding"; oId "lv:circTMEM49-2294-002|ts:circTMEM49-4174-001"; tissue "lv|ts";
16	ncSplice	exon	44048667	44048747	.	+	.	gene_id "ENSMMUG00000001741"; transcript_id "rmCircRNA-222"; exon_number "5" gene_name "TMEM49"; gene_biotype "protein_coding"; oId "lv:circTMEM49-2294-002|ts:circTMEM49-4174-001"; tissue "lv|ts";
16	ncSplice	exon	44051949	44052065	.	+	.	gene_id "ENSMMUG00000001741"; transcript_id "rmCircRNA-222"; exon_number "6" gene_name "TMEM49"; gene_biotype "protein_coding"; oId "lv:circTMEM49-2294-002|ts:circTMEM49-4174-001"; tissue "lv|ts";
16	ncSplice	exon	44059076	44059137	.	+	.	gene_id "ENSMMUG00000001741"; transcript_id "rmCircRNA-222"; exon_number "7" gene_name "TMEM49"; gene_biotype "protein_coding"; oId "lv:circTMEM49-2294-002|ts:circTMEM49-4174-001"; tissue "lv|ts";
16	ncSplice	gene	49581034	49585657	.	+	.	gene_id "ENSMMUG00000021350"; gene_name "CDK12"; gene_source "ncSplice"; gene_biotype "protein_coding";
16	ncSplice	transcript	49581034	49585657	.	+	.	gene_id "ENSMMUG00000021350"; transcript_id "rmCircRNA-223"; gene_name "CDK12"; gene_biotype "protein_coding"; transcript_biotype "circRNA"; oId "lv:circCDK12-2334-001"; tissue "lv";
16	ncSplice	exon	49581034	49581210	.	+	.	gene_id "ENSMMUG00000021350"; transcript_id "rmCircRNA-223"; exon_number "1" gene_name "CDK12"; gene_biotype "protein_coding"; oId "lv:circCDK12-2334-001"; tissue "lv";
16	ncSplice	exon	49583422	49583561	.	+	.	gene_id "ENSMMUG00000021350"; transcript_id "rmCircRNA-223"; exon_number "2" gene_name "CDK12"; gene_biotype "protein_coding"; oId "lv:circCDK12-2334-001"; tissue "lv";
16	ncSplice	exon	49585487	49585657	.	+	.	gene_id "ENSMMUG00000021350"; transcript_id "rmCircRNA-223"; exon_number "3" gene_name "CDK12"; gene_biotype "protein_coding"; oId "lv:circCDK12-2334-001"; tissue "lv";
16	ncSplice	gene	53310487	53312549	.	+	.	gene_id "ENSMMUG00000010433"; gene_name "NBR1"; gene_source "ncSplice"; gene_biotype "protein_coding";
16	ncSplice	transcript	53310487	53312549	.	+	.	gene_id "ENSMMUG00000010433"; transcript_id "rmCircRNA-224"; gene_name "NBR1"; gene_biotype "protein_coding"; transcript_biotype "circRNA"; oId "lv:circNBR1-2364-002"; tissue "lv";
16	ncSplice	exon	53310487	53310581	.	+	.	gene_id "ENSMMUG00000010433"; transcript_id "rmCircRNA-224"; exon_number "1" gene_name "NBR1"; gene_biotype "protein_coding"; oId "lv:circNBR1-2364-002"; tissue "lv";
16	ncSplice	exon	53311416	53311473	.	+	.	gene_id "ENSMMUG00000010433"; transcript_id "rmCircRNA-224"; exon_number "2" gene_name "NBR1"; gene_biotype "protein_coding"; oId "lv:circNBR1-2364-002"; tissue "lv";
16	ncSplice	exon	53312444	53312549	.	+	.	gene_id "ENSMMUG00000010433"; transcript_id "rmCircRNA-224"; exon_number "3" gene_name "NBR1"; gene_biotype "protein_coding"; oId "lv:circNBR1-2364-002"; tissue "lv";
16	ncSplice	gene	58058721	58060185	.	+	.	gene_id "ENSMMUG00000002166"; gene_name "TLK2"; gene_source "ncSplice"; gene_biotype "protein_coding";
16	ncSplice	transcript	58058721	58060185	.	+	.	gene_id "ENSMMUG00000002166"; transcript_id "rmCircRNA-225"; gene_name "TLK2"; gene_biotype "protein_coding"; transcript_biotype "circRNA"; oId "lv:circTLK2-2389-001|ce:circTLK2-5444-001|ts:circTLK2-4364-001"; tissue "lv|ce|ts";
16	ncSplice	exon	58058721	58058816	.	+	.	gene_id "ENSMMUG00000002166"; transcript_id "rmCircRNA-225"; exon_number "1" gene_name "TLK2"; gene_biotype "protein_coding"; oId "lv:circTLK2-2389-001|ce:circTLK2-5444-001|ts:circTLK2-4364-001"; tissue "lv|ce|ts";
16	ncSplice	exon	58060093	58060185	.	+	.	gene_id "ENSMMUG00000002166"; transcript_id "rmCircRNA-225"; exon_number "2" gene_name "TLK2"; gene_biotype "protein_coding"; oId "lv:circTLK2-2389-001|ce:circTLK2-5444-001|ts:circTLK2-4364-001"; tissue "lv|ce|ts";
16	ncSplice	gene	61598795	61611895	.	-	.	gene_id "ENSMMUG00000015120"; gene_name "NA"; gene_source "ncSplice"; gene_biotype "protein_coding";
16	ncSplice	transcript	61598795	61611895	.	-	.	gene_id "ENSMMUG00000015120"; transcript_id "rmCircRNA-226"; gene_name "NA"; gene_biotype "protein_coding"; transcript_biotype "circRNA"; oId "lv:circNA-2407-001"; tissue "lv";
16	ncSplice	exon	61598795	61605277	.	-	.	gene_id "ENSMMUG00000015120"; transcript_id "rmCircRNA-226"; exon_number "1" gene_name "NA"; gene_biotype "protein_coding"; oId "lv:circNA-2407-001"; tissue "lv";
16	ncSplice	exon	61605415	61605458	.	-	.	gene_id "ENSMMUG00000015120"; transcript_id "rmCircRNA-226"; exon_number "2" gene_name "NA"; gene_biotype "protein_coding"; oId "lv:circNA-2407-001"; tissue "lv";
16	ncSplice	exon	61608913	61609101	.	-	.	gene_id "ENSMMUG00000015120"; transcript_id "rmCircRNA-226"; exon_number "3" gene_name "NA"; gene_biotype "protein_coding"; oId "lv:circNA-2407-001"; tissue "lv";
16	ncSplice	exon	61611256	61611740	.	-	.	gene_id "ENSMMUG00000015120"; transcript_id "rmCircRNA-226"; exon_number "4" gene_name "NA"; gene_biotype "protein_coding"; oId "lv:circNA-2407-001"; tissue "lv";
16	ncSplice	exon	61611819	61611895	.	-	.	gene_id "ENSMMUG00000015120"; transcript_id "rmCircRNA-226"; exon_number "5" gene_name "NA"; gene_biotype "protein_coding"; oId "lv:circNA-2407-001"; tissue "lv";
16	ncSplice	gene	64411195	64412102	.	-	.	gene_id "ENSMMUG00000018592"; gene_name "ABCA9"; gene_source "ncSplice"; gene_biotype "protein_coding";
16	ncSplice	transcript	64411195	64412102	.	-	.	gene_id "ENSMMUG00000018592"; transcript_id "rmCircRNA-227"; gene_name "ABCA9"; gene_biotype "protein_coding"; transcript_biotype "circRNA"; oId "lv:circABCA9-2427-001|ts:circABCA9-4411-001"; tissue "lv|ts";
16	ncSplice	exon	64411195	64411312	.	-	.	gene_id "ENSMMUG00000018592"; transcript_id "rmCircRNA-227"; exon_number "1" gene_name "ABCA9"; gene_biotype "protein_coding"; oId "lv:circABCA9-2427-001|ts:circABCA9-4411-001"; tissue "lv|ts";
16	ncSplice	exon	64411982	64412102	.	-	.	gene_id "ENSMMUG00000018592"; transcript_id "rmCircRNA-227"; exon_number "2" gene_name "ABCA9"; gene_biotype "protein_coding"; oId "lv:circABCA9-2427-001|ts:circABCA9-4411-001"; tissue "lv|ts";
17	ncSplice	gene	1079593	1147925	.	+	.	gene_id "ENSMMUG00000004560"; gene_name "CRYL1"; gene_source "ncSplice"; gene_biotype "protein_coding";
17	ncSplice	transcript	1079593	1147925	.	+	.	gene_id "ENSMMUG00000004560"; transcript_id "rmCircRNA-228"; gene_name "CRYL1"; gene_biotype "protein_coding"; transcript_biotype "circRNA"; oId "lv:circCRYL1-2466-060"; tissue "lv";
17	ncSplice	exon	1079593	1079700	.	+	.	gene_id "ENSMMUG00000004560"; transcript_id "rmCircRNA-228"; exon_number "1" gene_name "CRYL1"; gene_biotype "protein_coding"; oId "lv:circCRYL1-2466-060"; tissue "lv";
17	ncSplice	exon	1101904	1102030	.	+	.	gene_id "ENSMMUG00000004560"; transcript_id "rmCircRNA-228"; exon_number "2" gene_name "CRYL1"; gene_biotype "protein_coding"; oId "lv:circCRYL1-2466-060"; tissue "lv";
17	ncSplice	exon	1147764	1147925	.	+	.	gene_id "ENSMMUG00000004560"; transcript_id "rmCircRNA-228"; exon_number "3" gene_name "CRYL1"; gene_biotype "protein_coding"; oId "lv:circCRYL1-2466-060"; tissue "lv";
17	ncSplice	gene	1079593	1155198	.	+	.	gene_id "ENSMMUG00000004560"; gene_name "CRYL1"; gene_source "ncSplice"; gene_biotype "protein_coding";
17	ncSplice	transcript	1079593	1155198	.	+	.	gene_id "ENSMMUG00000004560"; transcript_id "rmCircRNA-229"; gene_name "CRYL1"; gene_biotype "protein_coding"; transcript_biotype "circRNA"; oId "lv:circCRYL1-2467-065"; tissue "lv";
17	ncSplice	exon	1079593	1079700	.	+	.	gene_id "ENSMMUG00000004560"; transcript_id "rmCircRNA-229"; exon_number "1" gene_name "CRYL1"; gene_biotype "protein_coding"; oId "lv:circCRYL1-2467-065"; tissue "lv";
17	ncSplice	exon	1101904	1102030	.	+	.	gene_id "ENSMMUG00000004560"; transcript_id "rmCircRNA-229"; exon_number "2" gene_name "CRYL1"; gene_biotype "protein_coding"; oId "lv:circCRYL1-2467-065"; tissue "lv";
17	ncSplice	exon	1147764	1147925	.	+	.	gene_id "ENSMMUG00000004560"; transcript_id "rmCircRNA-229"; exon_number "3" gene_name "CRYL1"; gene_biotype "protein_coding"; oId "lv:circCRYL1-2467-065"; tissue "lv";
17	ncSplice	exon	1155004	1155198	.	+	.	gene_id "ENSMMUG00000004560"; transcript_id "rmCircRNA-229"; exon_number "4" gene_name "CRYL1"; gene_biotype "protein_coding"; oId "lv:circCRYL1-2467-065"; tissue "lv";
17	ncSplice	gene	11887392	11897424	.	-	.	gene_id "ENSMMUG00000007200"; gene_name "N4BP2L2"; gene_source "ncSplice"; gene_biotype "protein_coding";
17	ncSplice	transcript	11887392	11897424	.	-	.	gene_id "ENSMMUG00000007200"; transcript_id "rmCircRNA-230"; gene_name "N4BP2L2"; gene_biotype "protein_coding"; transcript_biotype "circRNA"; oId "lv:circN4BP2L2-2474-001|ce:circN4BP2L2-5646-001|ts:circN4BP2L2-4517-001"; tissue "lv|ce|ts";
17	ncSplice	exon	11887392	11887538	.	-	.	gene_id "ENSMMUG00000007200"; transcript_id "rmCircRNA-230"; exon_number "1" gene_name "N4BP2L2"; gene_biotype "protein_coding"; oId "lv:circN4BP2L2-2474-001|ce:circN4BP2L2-5646-001|ts:circN4BP2L2-4517-001"; tissue "lv|ce|ts";
17	ncSplice	exon	11890618	11890694	.	-	.	gene_id "ENSMMUG00000007200"; transcript_id "rmCircRNA-230"; exon_number "2" gene_name "N4BP2L2"; gene_biotype "protein_coding"; oId "lv:circN4BP2L2-2474-001|ce:circN4BP2L2-5646-001|ts:circN4BP2L2-4517-001"; tissue "lv|ce|ts";
17	ncSplice	exon	11891393	11891481	.	-	.	gene_id "ENSMMUG00000007200"; transcript_id "rmCircRNA-230"; exon_number "3" gene_name "N4BP2L2"; gene_biotype "protein_coding"; oId "lv:circN4BP2L2-2474-001|ce:circN4BP2L2-5646-001|ts:circN4BP2L2-4517-001"; tissue "lv|ce|ts";
17	ncSplice	exon	11897350	11897424	.	-	.	gene_id "ENSMMUG00000007200"; transcript_id "rmCircRNA-230"; exon_number "4" gene_name "N4BP2L2"; gene_biotype "protein_coding"; oId "lv:circN4BP2L2-2474-001|ce:circN4BP2L2-5646-001|ts:circN4BP2L2-4517-001"; tissue "lv|ce|ts";
17	ncSplice	gene	20763128	20771180	.	-	.	gene_id "ENSMMUG00000011594"; gene_name "VWA8"; gene_source "ncSplice"; gene_biotype "protein_coding";
17	ncSplice	transcript	20763128	20771180	.	-	.	gene_id "ENSMMUG00000011594"; transcript_id "rmCircRNA-231"; gene_name "VWA8"; gene_biotype "protein_coding"; transcript_biotype "circRNA"; oId "lv:circVWA8-2511-001|ce:circVWA8-5758-001|ts:circVWA8-4616-001"; tissue "lv|ce|ts";
17	ncSplice	exon	20763128	20763243	.	-	.	gene_id "ENSMMUG00000011594"; transcript_id "rmCircRNA-231"; exon_number "1" gene_name "VWA8"; gene_biotype "protein_coding"; oId "lv:circVWA8-2511-001|ce:circVWA8-5758-001|ts:circVWA8-4616-001"; tissue "lv|ce|ts";
17	ncSplice	exon	20768589	20768666	.	-	.	gene_id "ENSMMUG00000011594"; transcript_id "rmCircRNA-231"; exon_number "2" gene_name "VWA8"; gene_biotype "protein_coding"; oId "lv:circVWA8-2511-001|ce:circVWA8-5758-001|ts:circVWA8-4616-001"; tissue "lv|ce|ts";
17	ncSplice	exon	20771012	20771180	.	-	.	gene_id "ENSMMUG00000011594"; transcript_id "rmCircRNA-231"; exon_number "3" gene_name "VWA8"; gene_biotype "protein_coding"; oId "lv:circVWA8-2511-001|ce:circVWA8-5758-001|ts:circVWA8-4616-001"; tissue "lv|ce|ts";
17	ncSplice	gene	20763128	20785201	.	-	.	gene_id "ENSMMUG00000011594"; gene_name "VWA8"; gene_source "ncSplice"; gene_biotype "protein_coding";
17	ncSplice	transcript	20763128	20785201	.	-	.	gene_id "ENSMMUG00000011594"; transcript_id "rmCircRNA-232"; gene_name "VWA8"; gene_biotype "protein_coding"; transcript_biotype "circRNA"; oId "lv:circVWA8-2512-002|ts:circVWA8-4617-002"; tissue "lv|ts";
17	ncSplice	exon	20763128	20763243	.	-	.	gene_id "ENSMMUG00000011594"; transcript_id "rmCircRNA-232"; exon_number "1" gene_name "VWA8"; gene_biotype "protein_coding"; oId "lv:circVWA8-2512-002|ts:circVWA8-4617-002"; tissue "lv|ts";
17	ncSplice	exon	20768589	20768666	.	-	.	gene_id "ENSMMUG00000011594"; transcript_id "rmCircRNA-232"; exon_number "2" gene_name "VWA8"; gene_biotype "protein_coding"; oId "lv:circVWA8-2512-002|ts:circVWA8-4617-002"; tissue "lv|ts";
17	ncSplice	exon	20771012	20771180	.	-	.	gene_id "ENSMMUG00000011594"; transcript_id "rmCircRNA-232"; exon_number "3" gene_name "VWA8"; gene_biotype "protein_coding"; oId "lv:circVWA8-2512-002|ts:circVWA8-4617-002"; tissue "lv|ts";
17	ncSplice	exon	20782121	20782234	.	-	.	gene_id "ENSMMUG00000011594"; transcript_id "rmCircRNA-232"; exon_number "4" gene_name "VWA8"; gene_biotype "protein_coding"; oId "lv:circVWA8-2512-002|ts:circVWA8-4617-002"; tissue "lv|ts";
17	ncSplice	exon	20785041	20785201	.	-	.	gene_id "ENSMMUG00000011594"; transcript_id "rmCircRNA-232"; exon_number "5" gene_name "VWA8"; gene_biotype "protein_coding"; oId "lv:circVWA8-2512-002|ts:circVWA8-4617-002"; tissue "lv|ts";
17	ncSplice	gene	20817657	20834148	.	-	.	gene_id "ENSMMUG00000011594"; gene_name "VWA8"; gene_source "ncSplice"; gene_biotype "protein_coding";
17	ncSplice	transcript	20817657	20834148	.	-	.	gene_id "ENSMMUG00000011594"; transcript_id "rmCircRNA-233"; gene_name "VWA8"; gene_biotype "protein_coding"; transcript_biotype "circRNA"; oId "lv:circVWA8-2516-001|ce:circVWA8-5762-001"; tissue "lv|ce";
17	ncSplice	exon	20817657	20817734	.	-	.	gene_id "ENSMMUG00000011594"; transcript_id "rmCircRNA-233"; exon_number "1" gene_name "VWA8"; gene_biotype "protein_coding"; oId "lv:circVWA8-2516-001|ce:circVWA8-5762-001"; tissue "lv|ce";
17	ncSplice	exon	20817825	20817959	.	-	.	gene_id "ENSMMUG00000011594"; transcript_id "rmCircRNA-233"; exon_number "2" gene_name "VWA8"; gene_biotype "protein_coding"; oId "lv:circVWA8-2516-001|ce:circVWA8-5762-001"; tissue "lv|ce";
17	ncSplice	exon	20820293	20820424	.	-	.	gene_id "ENSMMUG00000011594"; transcript_id "rmCircRNA-233"; exon_number "3" gene_name "VWA8"; gene_biotype "protein_coding"; oId "lv:circVWA8-2516-001|ce:circVWA8-5762-001"; tissue "lv|ce";
17	ncSplice	exon	20830278	20830382	.	-	.	gene_id "ENSMMUG00000011594"; transcript_id "rmCircRNA-233"; exon_number "4" gene_name "VWA8"; gene_biotype "protein_coding"; oId "lv:circVWA8-2516-001|ce:circVWA8-5762-001"; tissue "lv|ce";
17	ncSplice	exon	20832727	20832835	.	-	.	gene_id "ENSMMUG00000011594"; transcript_id "rmCircRNA-233"; exon_number "5" gene_name "VWA8"; gene_biotype "protein_coding"; oId "lv:circVWA8-2516-001|ce:circVWA8-5762-001"; tissue "lv|ce";
17	ncSplice	exon	20833571	20833620	.	-	.	gene_id "ENSMMUG00000011594"; transcript_id "rmCircRNA-233"; exon_number "6" gene_name "VWA8"; gene_biotype "protein_coding"; oId "lv:circVWA8-2516-001|ce:circVWA8-5762-001"; tissue "lv|ce";
17	ncSplice	exon	20833984	20834148	.	-	.	gene_id "ENSMMUG00000011594"; transcript_id "rmCircRNA-233"; exon_number "7" gene_name "VWA8"; gene_biotype "protein_coding"; oId "lv:circVWA8-2516-001|ce:circVWA8-5762-001"; tissue "lv|ce";
17	ncSplice	gene	24858126	24893572	.	-	.	gene_id "ENSMMUG00000017025"; gene_name "ZC3H13"; gene_source "ncSplice"; gene_biotype "protein_coding";
17	ncSplice	transcript	24858126	24893572	.	-	.	gene_id "ENSMMUG00000017025"; transcript_id "rmCircRNA-234"; gene_name "ZC3H13"; gene_biotype "protein_coding"; transcript_biotype "circRNA"; oId "lv:circZC3H13-2525-001"; tissue "lv";
17	ncSplice	exon	24858126	24858590	.	-	.	gene_id "ENSMMUG00000017025"; transcript_id "rmCircRNA-234"; exon_number "1" gene_name "ZC3H13"; gene_biotype "protein_coding"; oId "lv:circZC3H13-2525-001"; tissue "lv";
17	ncSplice	exon	24861956	24862266	.	-	.	gene_id "ENSMMUG00000017025"; transcript_id "rmCircRNA-234"; exon_number "2" gene_name "ZC3H13"; gene_biotype "protein_coding"; oId "lv:circZC3H13-2525-001"; tissue "lv";
17	ncSplice	exon	24876330	24876527	.	-	.	gene_id "ENSMMUG00000017025"; transcript_id "rmCircRNA-234"; exon_number "3" gene_name "ZC3H13"; gene_biotype "protein_coding"; oId "lv:circZC3H13-2525-001"; tissue "lv";
17	ncSplice	exon	24883420	24883577	.	-	.	gene_id "ENSMMUG00000017025"; transcript_id "rmCircRNA-234"; exon_number "4" gene_name "ZC3H13"; gene_biotype "protein_coding"; oId "lv:circZC3H13-2525-001"; tissue "lv";
17	ncSplice	exon	24884480	24884619	.	-	.	gene_id "ENSMMUG00000017025"; transcript_id "rmCircRNA-234"; exon_number "5" gene_name "ZC3H13"; gene_biotype "protein_coding"; oId "lv:circZC3H13-2525-001"; tissue "lv";
17	ncSplice	exon	24893464	24893572	.	-	.	gene_id "ENSMMUG00000017025"; transcript_id "rmCircRNA-234"; exon_number "6" gene_name "ZC3H13"; gene_biotype "protein_coding"; oId "lv:circZC3H13-2525-001"; tissue "lv";
17	ncSplice	gene	24893464	24919049	.	-	.	gene_id "ENSMMUG00000017025"; gene_name "ZC3H13"; gene_source "ncSplice"; gene_biotype "protein_coding";
17	ncSplice	transcript	24893464	24919049	.	-	.	gene_id "ENSMMUG00000017025"; transcript_id "rmCircRNA-235"; gene_name "ZC3H13"; gene_biotype "protein_coding"; transcript_biotype "circRNA"; oId "lv:circZC3H13-2531-002"; tissue "lv";
17	ncSplice	exon	24893464	24893572	.	-	.	gene_id "ENSMMUG00000017025"; transcript_id "rmCircRNA-235"; exon_number "1" gene_name "ZC3H13"; gene_biotype "protein_coding"; oId "lv:circZC3H13-2531-002"; tissue "lv";
17	ncSplice	exon	24915703	24915814	.	-	.	gene_id "ENSMMUG00000017025"; transcript_id "rmCircRNA-235"; exon_number "2" gene_name "ZC3H13"; gene_biotype "protein_coding"; oId "lv:circZC3H13-2531-002"; tissue "lv";
17	ncSplice	exon	24918496	24918605	.	-	.	gene_id "ENSMMUG00000017025"; transcript_id "rmCircRNA-235"; exon_number "3" gene_name "ZC3H13"; gene_biotype "protein_coding"; oId "lv:circZC3H13-2531-002"; tissue "lv";
17	ncSplice	exon	24918927	24919049	.	-	.	gene_id "ENSMMUG00000017025"; transcript_id "rmCircRNA-235"; exon_number "4" gene_name "ZC3H13"; gene_biotype "protein_coding"; oId "lv:circZC3H13-2531-002"; tissue "lv";
17	ncSplice	gene	24893464	24919052	.	-	.	gene_id "ENSMMUG00000017025"; gene_name "ZC3H13"; gene_source "ncSplice"; gene_biotype "protein_coding";
17	ncSplice	transcript	24893464	24919052	.	-	.	gene_id "ENSMMUG00000017025"; transcript_id "rmCircRNA-236"; gene_name "ZC3H13"; gene_biotype "protein_coding"; transcript_biotype "circRNA"; oId "lv:circZC3H13-2532-002"; tissue "lv";
17	ncSplice	exon	24893464	24893572	.	-	.	gene_id "ENSMMUG00000017025"; transcript_id "rmCircRNA-236"; exon_number "1" gene_name "ZC3H13"; gene_biotype "protein_coding"; oId "lv:circZC3H13-2532-002"; tissue "lv";
17	ncSplice	exon	24915703	24915814	.	-	.	gene_id "ENSMMUG00000017025"; transcript_id "rmCircRNA-236"; exon_number "2" gene_name "ZC3H13"; gene_biotype "protein_coding"; oId "lv:circZC3H13-2532-002"; tissue "lv";
17	ncSplice	exon	24918496	24918605	.	-	.	gene_id "ENSMMUG00000017025"; transcript_id "rmCircRNA-236"; exon_number "3" gene_name "ZC3H13"; gene_biotype "protein_coding"; oId "lv:circZC3H13-2532-002"; tissue "lv";
17	ncSplice	exon	24918927	24919052	.	-	.	gene_id "ENSMMUG00000017025"; transcript_id "rmCircRNA-236"; exon_number "4" gene_name "ZC3H13"; gene_biotype "protein_coding"; oId "lv:circZC3H13-2532-002"; tissue "lv";
17	ncSplice	gene	24938286	24956466	.	-	.	gene_id "ENSMMUG00000017029"; gene_name "CPB2"; gene_source "ncSplice"; gene_biotype "protein_coding";
17	ncSplice	transcript	24938286	24956466	.	-	.	gene_id "ENSMMUG00000017029"; transcript_id "rmCircRNA-237"; gene_name "CPB2"; gene_biotype "protein_coding"; transcript_biotype "circRNA"; oId "lv:circCPB2-2534-002"; tissue "lv";
17	ncSplice	exon	24938286	24951062	.	-	.	gene_id "ENSMMUG00000017029"; transcript_id "rmCircRNA-237"; exon_number "1" gene_name "CPB2"; gene_biotype "protein_coding"; oId "lv:circCPB2-2534-002"; tissue "lv";
17	ncSplice	exon	24953138	24953201	.	-	.	gene_id "ENSMMUG00000017029"; transcript_id "rmCircRNA-237"; exon_number "2" gene_name "CPB2"; gene_biotype "protein_coding"; oId "lv:circCPB2-2534-002"; tissue "lv";
17	ncSplice	exon	24954560	24954668	.	-	.	gene_id "ENSMMUG00000017029"; transcript_id "rmCircRNA-237"; exon_number "3" gene_name "CPB2"; gene_biotype "protein_coding"; oId "lv:circCPB2-2534-002"; tissue "lv";
17	ncSplice	exon	24954998	24956466	.	-	.	gene_id "ENSMMUG00000017029"; transcript_id "rmCircRNA-237"; exon_number "4" gene_name "CPB2"; gene_biotype "protein_coding"; oId "lv:circCPB2-2534-002"; tissue "lv";
17	ncSplice	gene	26801206	26801641	.	-	.	gene_id "ENSMMUG00000007539"; gene_name "SUCLA2"; gene_source "ncSplice"; gene_biotype "protein_coding";
17	ncSplice	transcript	26801206	26801641	.	-	.	gene_id "ENSMMUG00000007539"; transcript_id "rmCircRNA-238"; gene_name "SUCLA2"; gene_biotype "protein_coding"; transcript_biotype "circRNA"; oId "lv:circSUCLA2-2539-001|ce:circSUCLA2-5786-001"; tissue "lv|ce";
17	ncSplice	exon	26801206	26801368	.	-	.	gene_id "ENSMMUG00000007539"; transcript_id "rmCircRNA-238"; exon_number "1" gene_name "SUCLA2"; gene_biotype "protein_coding"; oId "lv:circSUCLA2-2539-001|ce:circSUCLA2-5786-001"; tissue "lv|ce";
17	ncSplice	exon	26801542	26801641	.	-	.	gene_id "ENSMMUG00000007539"; transcript_id "rmCircRNA-238"; exon_number "2" gene_name "SUCLA2"; gene_biotype "protein_coding"; oId "lv:circSUCLA2-2539-001|ce:circSUCLA2-5786-001"; tissue "lv|ce";
17	ncSplice	gene	39523708	39558770	.	+	.	gene_id "ENSMMUG00000007169"; gene_name "TDRD3"; gene_source "ncSplice"; gene_biotype "protein_coding";
17	ncSplice	transcript	39523708	39558770	.	+	.	gene_id "ENSMMUG00000007169"; transcript_id "rmCircRNA-239"; gene_name "TDRD3"; gene_biotype "protein_coding"; transcript_biotype "circRNA"; oId "lv:circTDRD3-2562-002|ce:circTDRD3-5833-012|ts:circTDRD3-4711-004"; tissue "lv|ce|ts";
17	ncSplice	exon	39523708	39523792	.	+	.	gene_id "ENSMMUG00000007169"; transcript_id "rmCircRNA-239"; exon_number "1" gene_name "TDRD3"; gene_biotype "protein_coding"; oId "lv:circTDRD3-2562-002|ce:circTDRD3-5833-012|ts:circTDRD3-4711-004"; tissue "lv|ce|ts";
17	ncSplice	exon	39529136	39529201	.	+	.	gene_id "ENSMMUG00000007169"; transcript_id "rmCircRNA-239"; exon_number "2" gene_name "TDRD3"; gene_biotype "protein_coding"; oId "lv:circTDRD3-2562-002|ce:circTDRD3-5833-012|ts:circTDRD3-4711-004"; tissue "lv|ce|ts";
17	ncSplice	exon	39552119	39552279	.	+	.	gene_id "ENSMMUG00000007169"; transcript_id "rmCircRNA-239"; exon_number "3" gene_name "TDRD3"; gene_biotype "protein_coding"; oId "lv:circTDRD3-2562-002|ce:circTDRD3-5833-012|ts:circTDRD3-4711-004"; tissue "lv|ce|ts";
17	ncSplice	exon	39558629	39558770	.	+	.	gene_id "ENSMMUG00000007169"; transcript_id "rmCircRNA-239"; exon_number "4" gene_name "TDRD3"; gene_biotype "protein_coding"; oId "lv:circTDRD3-2562-002|ce:circTDRD3-5833-012|ts:circTDRD3-4711-004"; tissue "lv|ce|ts";
17	ncSplice	gene	54265005	54298305	.	-	.	gene_id "ENSMMUG00000019097"; gene_name "KLF12"; gene_source "ncSplice"; gene_biotype "protein_coding";
17	ncSplice	transcript	54265005	54298305	.	-	.	gene_id "ENSMMUG00000019097"; transcript_id "rmCircRNA-240"; gene_name "KLF12"; gene_biotype "protein_coding"; transcript_biotype "circRNA"; oId "lv:circKLF12-2571-001|ce:circKLF12-5852-002"; tissue "lv|ce";
17	ncSplice	exon	54265005	54265140	.	-	.	gene_id "ENSMMUG00000019097"; transcript_id "rmCircRNA-240"; exon_number "1" gene_name "KLF12"; gene_biotype "protein_coding"; oId "lv:circKLF12-2571-001|ce:circKLF12-5852-002"; tissue "lv|ce";
17	ncSplice	exon	54297759	54298305	.	-	.	gene_id "ENSMMUG00000019097"; transcript_id "rmCircRNA-240"; exon_number "2" gene_name "KLF12"; gene_biotype "protein_coding"; oId "lv:circKLF12-2571-001|ce:circKLF12-5852-002"; tissue "lv|ce";
17	ncSplice	gene	58205703	58240461	.	+	.	gene_id "ENSMMUG00000000049"; gene_name "SLAIN1"; gene_source "ncSplice"; gene_biotype "protein_coding";
17	ncSplice	transcript	58205703	58240461	.	+	.	gene_id "ENSMMUG00000000049"; transcript_id "rmCircRNA-241"; gene_name "SLAIN1"; gene_biotype "protein_coding"; transcript_biotype "circRNA"; oId "lv:circSLAIN1-2591-007|ce:circSLAIN1-5895-003|ts:circSLAIN1-4769-002"; tissue "lv|ce|ts";
17	ncSplice	exon	58205703	58205842	.	+	.	gene_id "ENSMMUG00000000049"; transcript_id "rmCircRNA-241"; exon_number "1" gene_name "SLAIN1"; gene_biotype "protein_coding"; oId "lv:circSLAIN1-2591-007|ce:circSLAIN1-5895-003|ts:circSLAIN1-4769-002"; tissue "lv|ce|ts";
17	ncSplice	exon	58230948	58231097	.	+	.	gene_id "ENSMMUG00000000049"; transcript_id "rmCircRNA-241"; exon_number "2" gene_name "SLAIN1"; gene_biotype "protein_coding"; oId "lv:circSLAIN1-2591-007|ce:circSLAIN1-5895-003|ts:circSLAIN1-4769-002"; tissue "lv|ce|ts";
17	ncSplice	exon	58233016	58233357	.	+	.	gene_id "ENSMMUG00000000049"; transcript_id "rmCircRNA-241"; exon_number "3" gene_name "SLAIN1"; gene_biotype "protein_coding"; oId "lv:circSLAIN1-2591-007|ce:circSLAIN1-5895-003|ts:circSLAIN1-4769-002"; tissue "lv|ce|ts";
17	ncSplice	exon	58240306	58240461	.	+	.	gene_id "ENSMMUG00000000049"; transcript_id "rmCircRNA-241"; exon_number "4" gene_name "SLAIN1"; gene_biotype "protein_coding"; oId "lv:circSLAIN1-2591-007|ce:circSLAIN1-5895-003|ts:circSLAIN1-4769-002"; tissue "lv|ce|ts";
17	ncSplice	gene	7898735	7904486	.	+	.	gene_id "ENSMMUG00000022522"; gene_name "PAN3"; gene_source "ncSplice"; gene_biotype "protein_coding";
17	ncSplice	transcript	7898735	7904486	.	+	.	gene_id "ENSMMUG00000022522"; transcript_id "rmCircRNA-242"; gene_name "PAN3"; gene_biotype "protein_coding"; transcript_biotype "circRNA"; oId "lv:circPAN3-2617-001|ce:circPAN3-5959-002|ts:circPAN3-4856-002"; tissue "lv|ce|ts";
17	ncSplice	exon	7898735	7898982	.	+	.	gene_id "ENSMMUG00000022522"; transcript_id "rmCircRNA-242"; exon_number "1" gene_name "PAN3"; gene_biotype "protein_coding"; oId "lv:circPAN3-2617-001|ce:circPAN3-5959-002|ts:circPAN3-4856-002"; tissue "lv|ce|ts";
17	ncSplice	exon	7903486	7903590	.	+	.	gene_id "ENSMMUG00000022522"; transcript_id "rmCircRNA-242"; exon_number "2" gene_name "PAN3"; gene_biotype "protein_coding"; oId "lv:circPAN3-2617-001|ce:circPAN3-5959-002|ts:circPAN3-4856-002"; tissue "lv|ce|ts";
17	ncSplice	exon	7904429	7904486	.	+	.	gene_id "ENSMMUG00000022522"; transcript_id "rmCircRNA-242"; exon_number "3" gene_name "PAN3"; gene_biotype "protein_coding"; oId "lv:circPAN3-2617-001|ce:circPAN3-5959-002|ts:circPAN3-4856-002"; tissue "lv|ce|ts";
17	ncSplice	gene	80595437	80613631	.	+	.	gene_id "ENSMMUG00000004493"; gene_name "PCCA"; gene_source "ncSplice"; gene_biotype "protein_coding";
17	ncSplice	transcript	80595437	80613631	.	+	.	gene_id "ENSMMUG00000004493"; transcript_id "rmCircRNA-243"; gene_name "PCCA"; gene_biotype "protein_coding"; transcript_biotype "circRNA"; oId "lv:circPCCA-2625-001|ce:circPCCA-5972-001"; tissue "lv|ce";
17	ncSplice	exon	80595437	80595515	.	+	.	gene_id "ENSMMUG00000004493"; transcript_id "rmCircRNA-243"; exon_number "1" gene_name "PCCA"; gene_biotype "protein_coding"; oId "lv:circPCCA-2625-001|ce:circPCCA-5972-001"; tissue "lv|ce";
17	ncSplice	exon	80600492	80600594	.	+	.	gene_id "ENSMMUG00000004493"; transcript_id "rmCircRNA-243"; exon_number "2" gene_name "PCCA"; gene_biotype "protein_coding"; oId "lv:circPCCA-2625-001|ce:circPCCA-5972-001"; tissue "lv|ce";
17	ncSplice	exon	80608522	80608616	.	+	.	gene_id "ENSMMUG00000004493"; transcript_id "rmCircRNA-243"; exon_number "3" gene_name "PCCA"; gene_biotype "protein_coding"; oId "lv:circPCCA-2625-001|ce:circPCCA-5972-001"; tissue "lv|ce";
17	ncSplice	exon	80613481	80613631	.	+	.	gene_id "ENSMMUG00000004493"; transcript_id "rmCircRNA-243"; exon_number "4" gene_name "PCCA"; gene_biotype "protein_coding"; oId "lv:circPCCA-2625-001|ce:circPCCA-5972-001"; tissue "lv|ce";
17	ncSplice	gene	80637779	80646630	.	+	.	gene_id "ENSMMUG00000004493"; gene_name "PCCA"; gene_source "ncSplice"; gene_biotype "protein_coding";
17	ncSplice	transcript	80637779	80646630	.	+	.	gene_id "ENSMMUG00000004493"; transcript_id "rmCircRNA-244"; gene_name "PCCA"; gene_biotype "protein_coding"; transcript_biotype "circRNA"; oId "lv:circPCCA-2629-002|ce:circPCCA-5975-002"; tissue "lv|ce";
17	ncSplice	exon	80637779	80637999	.	+	.	gene_id "ENSMMUG00000004493"; transcript_id "rmCircRNA-244"; exon_number "1" gene_name "PCCA"; gene_biotype "protein_coding"; oId "lv:circPCCA-2629-002|ce:circPCCA-5975-002"; tissue "lv|ce";
17	ncSplice	exon	80639236	80639310	.	+	.	gene_id "ENSMMUG00000004493"; transcript_id "rmCircRNA-244"; exon_number "2" gene_name "PCCA"; gene_biotype "protein_coding"; oId "lv:circPCCA-2629-002|ce:circPCCA-5975-002"; tissue "lv|ce";
17	ncSplice	exon	80643541	80643609	.	+	.	gene_id "ENSMMUG00000004493"; transcript_id "rmCircRNA-244"; exon_number "3" gene_name "PCCA"; gene_biotype "protein_coding"; oId "lv:circPCCA-2629-002|ce:circPCCA-5975-002"; tissue "lv|ce";
17	ncSplice	exon	80646555	80646630	.	+	.	gene_id "ENSMMUG00000004493"; transcript_id "rmCircRNA-244"; exon_number "4" gene_name "PCCA"; gene_biotype "protein_coding"; oId "lv:circPCCA-2629-002|ce:circPCCA-5975-002"; tissue "lv|ce";
17	ncSplice	gene	80637779	80677148	.	+	.	gene_id "ENSMMUG00000004493"; gene_name "PCCA"; gene_source "ncSplice"; gene_biotype "protein_coding";
17	ncSplice	transcript	80637779	80677148	.	+	.	gene_id "ENSMMUG00000004493"; transcript_id "rmCircRNA-245"; gene_name "PCCA"; gene_biotype "protein_coding"; transcript_biotype "circRNA"; oId "lv:circPCCA-2631-005|ce:circPCCA-5977-004"; tissue "lv|ce";
17	ncSplice	exon	80637779	80637999	.	+	.	gene_id "ENSMMUG00000004493"; transcript_id "rmCircRNA-245"; exon_number "1" gene_name "PCCA"; gene_biotype "protein_coding"; oId "lv:circPCCA-2631-005|ce:circPCCA-5977-004"; tissue "lv|ce";
17	ncSplice	exon	80639236	80639310	.	+	.	gene_id "ENSMMUG00000004493"; transcript_id "rmCircRNA-245"; exon_number "2" gene_name "PCCA"; gene_biotype "protein_coding"; oId "lv:circPCCA-2631-005|ce:circPCCA-5977-004"; tissue "lv|ce";
17	ncSplice	exon	80643541	80643609	.	+	.	gene_id "ENSMMUG00000004493"; transcript_id "rmCircRNA-245"; exon_number "3" gene_name "PCCA"; gene_biotype "protein_coding"; oId "lv:circPCCA-2631-005|ce:circPCCA-5977-004"; tissue "lv|ce";
17	ncSplice	exon	80646555	80646630	.	+	.	gene_id "ENSMMUG00000004493"; transcript_id "rmCircRNA-245"; exon_number "4" gene_name "PCCA"; gene_biotype "protein_coding"; oId "lv:circPCCA-2631-005|ce:circPCCA-5977-004"; tissue "lv|ce";
17	ncSplice	exon	80667018	80667128	.	+	.	gene_id "ENSMMUG00000004493"; transcript_id "rmCircRNA-245"; exon_number "5" gene_name "PCCA"; gene_biotype "protein_coding"; oId "lv:circPCCA-2631-005|ce:circPCCA-5977-004"; tissue "lv|ce";
17	ncSplice	exon	80677046	80677148	.	+	.	gene_id "ENSMMUG00000004493"; transcript_id "rmCircRNA-245"; exon_number "6" gene_name "PCCA"; gene_biotype "protein_coding"; oId "lv:circPCCA-2631-005|ce:circPCCA-5977-004"; tissue "lv|ce";
17	ncSplice	gene	80637779	80711549	.	+	.	gene_id "ENSMMUG00000004493"; gene_name "PCCA"; gene_source "ncSplice"; gene_biotype "protein_coding";
17	ncSplice	transcript	80637779	80711549	.	+	.	gene_id "ENSMMUG00000004493"; transcript_id "rmCircRNA-246"; gene_name "PCCA"; gene_biotype "protein_coding"; transcript_biotype "circRNA"; oId "lv:circPCCA-2632-005|ce:circPCCA-5978-020"; tissue "lv|ce";
17	ncSplice	exon	80637779	80637999	.	+	.	gene_id "ENSMMUG00000004493"; transcript_id "rmCircRNA-246"; exon_number "1" gene_name "PCCA"; gene_biotype "protein_coding"; oId "lv:circPCCA-2632-005|ce:circPCCA-5978-020"; tissue "lv|ce";
17	ncSplice	exon	80639236	80639310	.	+	.	gene_id "ENSMMUG00000004493"; transcript_id "rmCircRNA-246"; exon_number "2" gene_name "PCCA"; gene_biotype "protein_coding"; oId "lv:circPCCA-2632-005|ce:circPCCA-5978-020"; tissue "lv|ce";
17	ncSplice	exon	80643541	80643609	.	+	.	gene_id "ENSMMUG00000004493"; transcript_id "rmCircRNA-246"; exon_number "3" gene_name "PCCA"; gene_biotype "protein_coding"; oId "lv:circPCCA-2632-005|ce:circPCCA-5978-020"; tissue "lv|ce";
17	ncSplice	exon	80646555	80646630	.	+	.	gene_id "ENSMMUG00000004493"; transcript_id "rmCircRNA-246"; exon_number "4" gene_name "PCCA"; gene_biotype "protein_coding"; oId "lv:circPCCA-2632-005|ce:circPCCA-5978-020"; tissue "lv|ce";
17	ncSplice	exon	80667018	80667128	.	+	.	gene_id "ENSMMUG00000004493"; transcript_id "rmCircRNA-246"; exon_number "5" gene_name "PCCA"; gene_biotype "protein_coding"; oId "lv:circPCCA-2632-005|ce:circPCCA-5978-020"; tissue "lv|ce";
17	ncSplice	exon	80677046	80677148	.	+	.	gene_id "ENSMMUG00000004493"; transcript_id "rmCircRNA-246"; exon_number "6" gene_name "PCCA"; gene_biotype "protein_coding"; oId "lv:circPCCA-2632-005|ce:circPCCA-5978-020"; tissue "lv|ce";
17	ncSplice	exon	80711447	80711549	.	+	.	gene_id "ENSMMUG00000004493"; transcript_id "rmCircRNA-246"; exon_number "7" gene_name "PCCA"; gene_biotype "protein_coding"; oId "lv:circPCCA-2632-005|ce:circPCCA-5978-020"; tissue "lv|ce";
17	ncSplice	gene	80643541	80677148	.	+	.	gene_id "ENSMMUG00000004493"; gene_name "PCCA"; gene_source "ncSplice"; gene_biotype "protein_coding";
17	ncSplice	transcript	80643541	80677148	.	+	.	gene_id "ENSMMUG00000004493"; transcript_id "rmCircRNA-247"; gene_name "PCCA"; gene_biotype "protein_coding"; transcript_biotype "circRNA"; oId "lv:circPCCA-2633-002"; tissue "lv";
17	ncSplice	exon	80643541	80643609	.	+	.	gene_id "ENSMMUG00000004493"; transcript_id "rmCircRNA-247"; exon_number "1" gene_name "PCCA"; gene_biotype "protein_coding"; oId "lv:circPCCA-2633-002"; tissue "lv";
17	ncSplice	exon	80646555	80646630	.	+	.	gene_id "ENSMMUG00000004493"; transcript_id "rmCircRNA-247"; exon_number "2" gene_name "PCCA"; gene_biotype "protein_coding"; oId "lv:circPCCA-2633-002"; tissue "lv";
17	ncSplice	exon	80667018	80667128	.	+	.	gene_id "ENSMMUG00000004493"; transcript_id "rmCircRNA-247"; exon_number "3" gene_name "PCCA"; gene_biotype "protein_coding"; oId "lv:circPCCA-2633-002"; tissue "lv";
17	ncSplice	exon	80677046	80677148	.	+	.	gene_id "ENSMMUG00000004493"; transcript_id "rmCircRNA-247"; exon_number "4" gene_name "PCCA"; gene_biotype "protein_coding"; oId "lv:circPCCA-2633-002"; tissue "lv";
17	ncSplice	gene	80643541	80711549	.	+	.	gene_id "ENSMMUG00000004493"; gene_name "PCCA"; gene_source "ncSplice"; gene_biotype "protein_coding";
17	ncSplice	transcript	80643541	80711549	.	+	.	gene_id "ENSMMUG00000004493"; transcript_id "rmCircRNA-248"; gene_name "PCCA"; gene_biotype "protein_coding"; transcript_biotype "circRNA"; oId "lv:circPCCA-2634-002"; tissue "lv";
17	ncSplice	exon	80643541	80643609	.	+	.	gene_id "ENSMMUG00000004493"; transcript_id "rmCircRNA-248"; exon_number "1" gene_name "PCCA"; gene_biotype "protein_coding"; oId "lv:circPCCA-2634-002"; tissue "lv";
17	ncSplice	exon	80646555	80646630	.	+	.	gene_id "ENSMMUG00000004493"; transcript_id "rmCircRNA-248"; exon_number "2" gene_name "PCCA"; gene_biotype "protein_coding"; oId "lv:circPCCA-2634-002"; tissue "lv";
17	ncSplice	exon	80667018	80667128	.	+	.	gene_id "ENSMMUG00000004493"; transcript_id "rmCircRNA-248"; exon_number "3" gene_name "PCCA"; gene_biotype "protein_coding"; oId "lv:circPCCA-2634-002"; tissue "lv";
17	ncSplice	exon	80677046	80677148	.	+	.	gene_id "ENSMMUG00000004493"; transcript_id "rmCircRNA-248"; exon_number "4" gene_name "PCCA"; gene_biotype "protein_coding"; oId "lv:circPCCA-2634-002"; tissue "lv";
17	ncSplice	exon	80711447	80711549	.	+	.	gene_id "ENSMMUG00000004493"; transcript_id "rmCircRNA-248"; exon_number "5" gene_name "PCCA"; gene_biotype "protein_coding"; oId "lv:circPCCA-2634-002"; tissue "lv";
1	ncSplice	gene	78546480	78554400	.	+	.	gene_id "ENSMMUG00000007220"; gene_name "ACADM"; gene_source "ncSplice"; gene_biotype "protein_coding";
1	ncSplice	transcript	78546480	78554400	.	+	.	gene_id "ENSMMUG00000007220"; transcript_id "rmCircRNA-249"; gene_name "ACADM"; gene_biotype "protein_coding"; transcript_biotype "circRNA"; oId "lv:circACADM-2647-002|ce:circACADM-6011-003|ts:circACADM-4897-001"; tissue "lv|ce|ts";
1	ncSplice	exon	78546480	78546610	.	+	.	gene_id "ENSMMUG00000007220"; transcript_id "rmCircRNA-249"; exon_number "1" gene_name "ACADM"; gene_biotype "protein_coding"; oId "lv:circACADM-2647-002|ce:circACADM-6011-003|ts:circACADM-4897-001"; tissue "lv|ce|ts";
1	ncSplice	exon	78549668	78549776	.	+	.	gene_id "ENSMMUG00000007220"; transcript_id "rmCircRNA-249"; exon_number "2" gene_name "ACADM"; gene_biotype "protein_coding"; oId "lv:circACADM-2647-002|ce:circACADM-6011-003|ts:circACADM-4897-001"; tissue "lv|ce|ts";
1	ncSplice	exon	78553301	78553441	.	+	.	gene_id "ENSMMUG00000007220"; transcript_id "rmCircRNA-249"; exon_number "3" gene_name "ACADM"; gene_biotype "protein_coding"; oId "lv:circACADM-2647-002|ce:circACADM-6011-003|ts:circACADM-4897-001"; tissue "lv|ce|ts";
1	ncSplice	exon	78554305	78554400	.	+	.	gene_id "ENSMMUG00000007220"; transcript_id "rmCircRNA-249"; exon_number "4" gene_name "ACADM"; gene_biotype "protein_coding"; oId "lv:circACADM-2647-002|ce:circACADM-6011-003|ts:circACADM-4897-001"; tissue "lv|ce|ts";
1	ncSplice	gene	80550348	80564430	.	-	.	gene_id "ENSMMUG00000018326"; gene_name "USP33"; gene_source "ncSplice"; gene_biotype "protein_coding";
1	ncSplice	transcript	80550348	80564430	.	-	.	gene_id "ENSMMUG00000018326"; transcript_id "rmCircRNA-250"; gene_name "USP33"; gene_biotype "protein_coding"; transcript_biotype "circRNA"; oId "lv:circUSP33-2668-001|ce:circUSP33-6072-004"; tissue "lv|ce";
1	ncSplice	exon	80550348	80550450	.	-	.	gene_id "ENSMMUG00000018326"; transcript_id "rmCircRNA-250"; exon_number "1" gene_name "USP33"; gene_biotype "protein_coding"; oId "lv:circUSP33-2668-001|ce:circUSP33-6072-004"; tissue "lv|ce";
1	ncSplice	exon	80561413	80561521	.	-	.	gene_id "ENSMMUG00000018326"; transcript_id "rmCircRNA-250"; exon_number "2" gene_name "USP33"; gene_biotype "protein_coding"; oId "lv:circUSP33-2668-001|ce:circUSP33-6072-004"; tissue "lv|ce";
1	ncSplice	exon	80562875	80562956	.	-	.	gene_id "ENSMMUG00000018326"; transcript_id "rmCircRNA-250"; exon_number "3" gene_name "USP33"; gene_biotype "protein_coding"; oId "lv:circUSP33-2668-001|ce:circUSP33-6072-004"; tissue "lv|ce";
1	ncSplice	exon	80564261	80564430	.	-	.	gene_id "ENSMMUG00000018326"; transcript_id "rmCircRNA-250"; exon_number "4" gene_name "USP33"; gene_biotype "protein_coding"; oId "lv:circUSP33-2668-001|ce:circUSP33-6072-004"; tissue "lv|ce";
1	ncSplice	gene	80641645	80653672	.	+	.	gene_id "ENSMMUG00000011987"; gene_name "FAM73A"; gene_source "ncSplice"; gene_biotype "protein_coding";
1	ncSplice	transcript	80641645	80653672	.	+	.	gene_id "ENSMMUG00000011987"; transcript_id "rmCircRNA-251"; gene_name "FAM73A"; gene_biotype "protein_coding"; transcript_biotype "circRNA"; oId "lv:circFAM73A-2676-001|ce:circFAM73A-6083-001"; tissue "lv|ce";
1	ncSplice	exon	80641645	80641822	.	+	.	gene_id "ENSMMUG00000011987"; transcript_id "rmCircRNA-251"; exon_number "1" gene_name "FAM73A"; gene_biotype "protein_coding"; oId "lv:circFAM73A-2676-001|ce:circFAM73A-6083-001"; tissue "lv|ce";
1	ncSplice	exon	80644241	80644377	.	+	.	gene_id "ENSMMUG00000011987"; transcript_id "rmCircRNA-251"; exon_number "2" gene_name "FAM73A"; gene_biotype "protein_coding"; oId "lv:circFAM73A-2676-001|ce:circFAM73A-6083-001"; tissue "lv|ce";
1	ncSplice	exon	80647716	80647842	.	+	.	gene_id "ENSMMUG00000011987"; transcript_id "rmCircRNA-251"; exon_number "3" gene_name "FAM73A"; gene_biotype "protein_coding"; oId "lv:circFAM73A-2676-001|ce:circFAM73A-6083-001"; tissue "lv|ce";
1	ncSplice	exon	80652161	80652294	.	+	.	gene_id "ENSMMUG00000011987"; transcript_id "rmCircRNA-251"; exon_number "4" gene_name "FAM73A"; gene_biotype "protein_coding"; oId "lv:circFAM73A-2676-001|ce:circFAM73A-6083-001"; tissue "lv|ce";
1	ncSplice	exon	80653549	80653672	.	+	.	gene_id "ENSMMUG00000011987"; transcript_id "rmCircRNA-251"; exon_number "5" gene_name "FAM73A"; gene_biotype "protein_coding"; oId "lv:circFAM73A-2676-001|ce:circFAM73A-6083-001"; tissue "lv|ce";
18	ncSplice	gene	14771495	14785401	.	+	.	gene_id "ENSMMUG00000010227"; gene_name "MIB1"; gene_source "ncSplice"; gene_biotype "protein_coding";
18	ncSplice	transcript	14771495	14785401	.	+	.	gene_id "ENSMMUG00000010227"; transcript_id "rmCircRNA-252"; gene_name "MIB1"; gene_biotype "protein_coding"; transcript_biotype "circRNA"; oId "lv:circMIB1-2699-001|ce:circMIB1-6128-002|ts:circMIB1-5004-002"; tissue "lv|ce|ts";
18	ncSplice	exon	14771495	14771666	.	+	.	gene_id "ENSMMUG00000010227"; transcript_id "rmCircRNA-252"; exon_number "1" gene_name "MIB1"; gene_biotype "protein_coding"; oId "lv:circMIB1-2699-001|ce:circMIB1-6128-002|ts:circMIB1-5004-002"; tissue "lv|ce|ts";
18	ncSplice	exon	14774656	14774785	.	+	.	gene_id "ENSMMUG00000010227"; transcript_id "rmCircRNA-252"; exon_number "2" gene_name "MIB1"; gene_biotype "protein_coding"; oId "lv:circMIB1-2699-001|ce:circMIB1-6128-002|ts:circMIB1-5004-002"; tissue "lv|ce|ts";
18	ncSplice	exon	14779663	14779767	.	+	.	gene_id "ENSMMUG00000010227"; transcript_id "rmCircRNA-252"; exon_number "3" gene_name "MIB1"; gene_biotype "protein_coding"; oId "lv:circMIB1-2699-001|ce:circMIB1-6128-002|ts:circMIB1-5004-002"; tissue "lv|ce|ts";
18	ncSplice	exon	14783809	14783875	.	+	.	gene_id "ENSMMUG00000010227"; transcript_id "rmCircRNA-252"; exon_number "4" gene_name "MIB1"; gene_biotype "protein_coding"; oId "lv:circMIB1-2699-001|ce:circMIB1-6128-002|ts:circMIB1-5004-002"; tissue "lv|ce|ts";
18	ncSplice	exon	14785197	14785401	.	+	.	gene_id "ENSMMUG00000010227"; transcript_id "rmCircRNA-252"; exon_number "5" gene_name "MIB1"; gene_biotype "protein_coding"; oId "lv:circMIB1-2699-001|ce:circMIB1-6128-002|ts:circMIB1-5004-002"; tissue "lv|ce|ts";
18	ncSplice	gene	17066943	17107937	.	+	.	gene_id "ENSMMUG00000004343"; gene_name "TTC39C"; gene_source "ncSplice"; gene_biotype "protein_coding";
18	ncSplice	transcript	17066943	17107937	.	+	.	gene_id "ENSMMUG00000004343"; transcript_id "rmCircRNA-253"; gene_name "TTC39C"; gene_biotype "protein_coding"; transcript_biotype "circRNA"; oId "lv:circTTC39C-2709-006"; tissue "lv";
18	ncSplice	exon	17066943	17067049	.	+	.	gene_id "ENSMMUG00000004343"; transcript_id "rmCircRNA-253"; exon_number "1" gene_name "TTC39C"; gene_biotype "protein_coding"; oId "lv:circTTC39C-2709-006"; tissue "lv";
18	ncSplice	exon	17089501	17089549	.	+	.	gene_id "ENSMMUG00000004343"; transcript_id "rmCircRNA-253"; exon_number "2" gene_name "TTC39C"; gene_biotype "protein_coding"; oId "lv:circTTC39C-2709-006"; tissue "lv";
18	ncSplice	exon	17091389	17091517	.	+	.	gene_id "ENSMMUG00000004343"; transcript_id "rmCircRNA-253"; exon_number "3" gene_name "TTC39C"; gene_biotype "protein_coding"; oId "lv:circTTC39C-2709-006"; tissue "lv";
18	ncSplice	exon	17094523	17094637	.	+	.	gene_id "ENSMMUG00000004343"; transcript_id "rmCircRNA-253"; exon_number "4" gene_name "TTC39C"; gene_biotype "protein_coding"; oId "lv:circTTC39C-2709-006"; tissue "lv";
18	ncSplice	exon	17105601	17105955	.	+	.	gene_id "ENSMMUG00000004343"; transcript_id "rmCircRNA-253"; exon_number "5" gene_name "TTC39C"; gene_biotype "protein_coding"; oId "lv:circTTC39C-2709-006"; tissue "lv";
18	ncSplice	exon	17107769	17107937	.	+	.	gene_id "ENSMMUG00000004343"; transcript_id "rmCircRNA-253"; exon_number "6" gene_name "TTC39C"; gene_biotype "protein_coding"; oId "lv:circTTC39C-2709-006"; tissue "lv";
18	ncSplice	gene	17089501	17094637	.	+	.	gene_id "ENSMMUG00000004343"; gene_name "TTC39C"; gene_source "ncSplice"; gene_biotype "protein_coding";
18	ncSplice	transcript	17089501	17094637	.	+	.	gene_id "ENSMMUG00000004343"; transcript_id "rmCircRNA-254"; gene_name "TTC39C"; gene_biotype "protein_coding"; transcript_biotype "circRNA"; oId "lv:circTTC39C-2710-001"; tissue "lv";
18	ncSplice	exon	17089501	17089549	.	+	.	gene_id "ENSMMUG00000004343"; transcript_id "rmCircRNA-254"; exon_number "1" gene_name "TTC39C"; gene_biotype "protein_coding"; oId "lv:circTTC39C-2710-001"; tissue "lv";
18	ncSplice	exon	17091389	17091517	.	+	.	gene_id "ENSMMUG00000004343"; transcript_id "rmCircRNA-254"; exon_number "2" gene_name "TTC39C"; gene_biotype "protein_coding"; oId "lv:circTTC39C-2710-001"; tissue "lv";
18	ncSplice	exon	17094523	17094637	.	+	.	gene_id "ENSMMUG00000004343"; transcript_id "rmCircRNA-254"; exon_number "3" gene_name "TTC39C"; gene_biotype "protein_coding"; oId "lv:circTTC39C-2710-001"; tissue "lv";
18	ncSplice	gene	17089501	17107937	.	+	.	gene_id "ENSMMUG00000004343"; gene_name "TTC39C"; gene_source "ncSplice"; gene_biotype "protein_coding";
18	ncSplice	transcript	17089501	17107937	.	+	.	gene_id "ENSMMUG00000004343"; transcript_id "rmCircRNA-255"; gene_name "TTC39C"; gene_biotype "protein_coding"; transcript_biotype "circRNA"; oId "lv:circTTC39C-2711-006|ts:circTTC39C-5033-003"; tissue "lv|ts";
18	ncSplice	exon	17089501	17089549	.	+	.	gene_id "ENSMMUG00000004343"; transcript_id "rmCircRNA-255"; exon_number "1" gene_name "TTC39C"; gene_biotype "protein_coding"; oId "lv:circTTC39C-2711-006|ts:circTTC39C-5033-003"; tissue "lv|ts";
18	ncSplice	exon	17091389	17091517	.	+	.	gene_id "ENSMMUG00000004343"; transcript_id "rmCircRNA-255"; exon_number "2" gene_name "TTC39C"; gene_biotype "protein_coding"; oId "lv:circTTC39C-2711-006|ts:circTTC39C-5033-003"; tissue "lv|ts";
18	ncSplice	exon	17094523	17094637	.	+	.	gene_id "ENSMMUG00000004343"; transcript_id "rmCircRNA-255"; exon_number "3" gene_name "TTC39C"; gene_biotype "protein_coding"; oId "lv:circTTC39C-2711-006|ts:circTTC39C-5033-003"; tissue "lv|ts";
18	ncSplice	exon	17105601	17105955	.	+	.	gene_id "ENSMMUG00000004343"; transcript_id "rmCircRNA-255"; exon_number "4" gene_name "TTC39C"; gene_biotype "protein_coding"; oId "lv:circTTC39C-2711-006|ts:circTTC39C-5033-003"; tissue "lv|ts";
18	ncSplice	exon	17107769	17107937	.	+	.	gene_id "ENSMMUG00000004343"; transcript_id "rmCircRNA-255"; exon_number "5" gene_name "TTC39C"; gene_biotype "protein_coding"; oId "lv:circTTC39C-2711-006|ts:circTTC39C-5033-003"; tissue "lv|ts";
18	ncSplice	gene	17168910	17169232	.	+	.	gene_id "ENSMMUG00000004346"; gene_name "CABYR"; gene_source "ncSplice"; gene_biotype "protein_coding";
18	ncSplice	transcript	17168910	17169232	.	+	.	gene_id "ENSMMUG00000004346"; transcript_id "rmCircRNA-256"; gene_name "CABYR"; gene_biotype "protein_coding"; transcript_biotype "circRNA"; oId "lv:circCABYR-2715-001|ce:circCABYR-6157-001"; tissue "lv|ce";
18	ncSplice	exon	17168910	17169078	.	+	.	gene_id "ENSMMUG00000004346"; transcript_id "rmCircRNA-256"; exon_number "1" gene_name "CABYR"; gene_biotype "protein_coding"; oId "lv:circCABYR-2715-001|ce:circCABYR-6157-001"; tissue "lv|ce";
18	ncSplice	exon	17169179	17169232	.	+	.	gene_id "ENSMMUG00000004346"; transcript_id "rmCircRNA-256"; exon_number "2" gene_name "CABYR"; gene_biotype "protein_coding"; oId "lv:circCABYR-2715-001|ce:circCABYR-6157-001"; tissue "lv|ce";
18	ncSplice	gene	19011254	19068512	.	-	.	gene_id "ENSMMUG00000018059"; gene_name "SS18"; gene_source "ncSplice"; gene_biotype "protein_coding";
18	ncSplice	transcript	19011254	19068512	.	-	.	gene_id "ENSMMUG00000018059"; transcript_id "rmCircRNA-257"; gene_name "SS18"; gene_biotype "protein_coding"; transcript_biotype "circRNA"; oId "lv:circSS18-2723-006"; tissue "lv";
18	ncSplice	exon	19011254	19011617	.	-	.	gene_id "ENSMMUG00000018059"; transcript_id "rmCircRNA-257"; exon_number "1" gene_name "SS18"; gene_biotype "protein_coding"; oId "lv:circSS18-2723-006"; tissue "lv";
18	ncSplice	exon	19025338	19025471	.	-	.	gene_id "ENSMMUG00000018059"; transcript_id "rmCircRNA-257"; exon_number "2" gene_name "SS18"; gene_biotype "protein_coding"; oId "lv:circSS18-2723-006"; tissue "lv";
18	ncSplice	exon	19028001	19028123	.	-	.	gene_id "ENSMMUG00000018059"; transcript_id "rmCircRNA-257"; exon_number "3" gene_name "SS18"; gene_biotype "protein_coding"; oId "lv:circSS18-2723-006"; tissue "lv";
18	ncSplice	exon	19031557	19031661	.	-	.	gene_id "ENSMMUG00000018059"; transcript_id "rmCircRNA-257"; exon_number "4" gene_name "SS18"; gene_biotype "protein_coding"; oId "lv:circSS18-2723-006"; tissue "lv";
18	ncSplice	exon	19032304	19032471	.	-	.	gene_id "ENSMMUG00000018059"; transcript_id "rmCircRNA-257"; exon_number "5" gene_name "SS18"; gene_biotype "protein_coding"; oId "lv:circSS18-2723-006"; tissue "lv";
18	ncSplice	exon	19042209	19042430	.	-	.	gene_id "ENSMMUG00000018059"; transcript_id "rmCircRNA-257"; exon_number "6" gene_name "SS18"; gene_biotype "protein_coding"; oId "lv:circSS18-2723-006"; tissue "lv";
18	ncSplice	exon	19047190	19047343	.	-	.	gene_id "ENSMMUG00000018059"; transcript_id "rmCircRNA-257"; exon_number "7" gene_name "SS18"; gene_biotype "protein_coding"; oId "lv:circSS18-2723-006"; tissue "lv";
18	ncSplice	exon	19068428	19068512	.	-	.	gene_id "ENSMMUG00000018059"; transcript_id "rmCircRNA-257"; exon_number "8" gene_name "SS18"; gene_biotype "protein_coding"; oId "lv:circSS18-2723-006"; tissue "lv";
18	ncSplice	gene	19042209	19068512	.	-	.	gene_id "ENSMMUG00000018059"; gene_name "SS18"; gene_source "ncSplice"; gene_biotype "protein_coding";
18	ncSplice	transcript	19042209	19068512	.	-	.	gene_id "ENSMMUG00000018059"; transcript_id "rmCircRNA-258"; gene_name "SS18"; gene_biotype "protein_coding"; transcript_biotype "circRNA"; oId "lv:circSS18-2726-001|ts:circSS18-5054-002"; tissue "lv|ts";
18	ncSplice	exon	19042209	19042430	.	-	.	gene_id "ENSMMUG00000018059"; transcript_id "rmCircRNA-258"; exon_number "1" gene_name "SS18"; gene_biotype "protein_coding"; oId "lv:circSS18-2726-001|ts:circSS18-5054-002"; tissue "lv|ts";
18	ncSplice	exon	19047190	19047343	.	-	.	gene_id "ENSMMUG00000018059"; transcript_id "rmCircRNA-258"; exon_number "2" gene_name "SS18"; gene_biotype "protein_coding"; oId "lv:circSS18-2726-001|ts:circSS18-5054-002"; tissue "lv|ts";
18	ncSplice	exon	19068428	19068512	.	-	.	gene_id "ENSMMUG00000018059"; transcript_id "rmCircRNA-258"; exon_number "3" gene_name "SS18"; gene_biotype "protein_coding"; oId "lv:circSS18-2726-001|ts:circSS18-5054-002"; tissue "lv|ts";
18	ncSplice	gene	28990669	28996967	.	-	.	gene_id "ENSMMUG00000018777"; gene_name "RPRD1A"; gene_source "ncSplice"; gene_biotype "protein_coding";
18	ncSplice	transcript	28990669	28996967	.	-	.	gene_id "ENSMMUG00000018777"; transcript_id "rmCircRNA-259"; gene_name "RPRD1A"; gene_biotype "protein_coding"; transcript_biotype "circRNA"; oId "lv:circRPRD1A-2739-001|ce:circRPRD1A-6247-001|ts:circRPRD1A-5106-001"; tissue "lv|ce|ts";
18	ncSplice	exon	28990669	28990844	.	-	.	gene_id "ENSMMUG00000018777"; transcript_id "rmCircRNA-259"; exon_number "1" gene_name "RPRD1A"; gene_biotype "protein_coding"; oId "lv:circRPRD1A-2739-001|ce:circRPRD1A-6247-001|ts:circRPRD1A-5106-001"; tissue "lv|ce|ts";
18	ncSplice	exon	28990952	28991078	.	-	.	gene_id "ENSMMUG00000018777"; transcript_id "rmCircRNA-259"; exon_number "2" gene_name "RPRD1A"; gene_biotype "protein_coding"; oId "lv:circRPRD1A-2739-001|ce:circRPRD1A-6247-001|ts:circRPRD1A-5106-001"; tissue "lv|ce|ts";
18	ncSplice	exon	28993963	28994060	.	-	.	gene_id "ENSMMUG00000018777"; transcript_id "rmCircRNA-259"; exon_number "3" gene_name "RPRD1A"; gene_biotype "protein_coding"; oId "lv:circRPRD1A-2739-001|ce:circRPRD1A-6247-001|ts:circRPRD1A-5106-001"; tissue "lv|ce|ts";
18	ncSplice	exon	28994145	28994251	.	-	.	gene_id "ENSMMUG00000018777"; transcript_id "rmCircRNA-259"; exon_number "4" gene_name "RPRD1A"; gene_biotype "protein_coding"; oId "lv:circRPRD1A-2739-001|ce:circRPRD1A-6247-001|ts:circRPRD1A-5106-001"; tissue "lv|ce|ts";
18	ncSplice	exon	28996838	28996967	.	-	.	gene_id "ENSMMUG00000018777"; transcript_id "rmCircRNA-259"; exon_number "5" gene_name "RPRD1A"; gene_biotype "protein_coding"; oId "lv:circRPRD1A-2739-001|ce:circRPRD1A-6247-001|ts:circRPRD1A-5106-001"; tissue "lv|ce|ts";
18	ncSplice	gene	44147787	44171433	.	+	.	gene_id "ENSMMUG00000018334"; gene_name "SMAD4"; gene_source "ncSplice"; gene_biotype "protein_coding";
18	ncSplice	transcript	44147787	44171433	.	+	.	gene_id "ENSMMUG00000018334"; transcript_id "rmCircRNA-260"; gene_name "SMAD4"; gene_biotype "protein_coding"; transcript_biotype "circRNA"; oId "lv:circSMAD4-2769-004|ce:circSMAD4-6332-008"; tissue "lv|ce";
18	ncSplice	exon	44147787	44148162	.	+	.	gene_id "ENSMMUG00000018334"; transcript_id "rmCircRNA-260"; exon_number "1" gene_name "SMAD4"; gene_biotype "protein_coding"; oId "lv:circSMAD4-2769-004|ce:circSMAD4-6332-008"; tissue "lv|ce";
18	ncSplice	exon	44149545	44149719	.	+	.	gene_id "ENSMMUG00000018334"; transcript_id "rmCircRNA-260"; exon_number "2" gene_name "SMAD4"; gene_biotype "protein_coding"; oId "lv:circSMAD4-2769-004|ce:circSMAD4-6332-008"; tissue "lv|ce";
18	ncSplice	exon	44150152	44150181	.	+	.	gene_id "ENSMMUG00000018334"; transcript_id "rmCircRNA-260"; exon_number "3" gene_name "SMAD4"; gene_biotype "protein_coding"; oId "lv:circSMAD4-2769-004|ce:circSMAD4-6332-008"; tissue "lv|ce";
18	ncSplice	exon	44155230	44155442	.	+	.	gene_id "ENSMMUG00000018334"; transcript_id "rmCircRNA-260"; exon_number "4" gene_name "SMAD4"; gene_biotype "protein_coding"; oId "lv:circSMAD4-2769-004|ce:circSMAD4-6332-008"; tissue "lv|ce";
18	ncSplice	exon	44158417	44158536	.	+	.	gene_id "ENSMMUG00000018334"; transcript_id "rmCircRNA-260"; exon_number "5" gene_name "SMAD4"; gene_biotype "protein_coding"; oId "lv:circSMAD4-2769-004|ce:circSMAD4-6332-008"; tissue "lv|ce";
18	ncSplice	exon	44158633	44158749	.	+	.	gene_id "ENSMMUG00000018334"; transcript_id "rmCircRNA-260"; exon_number "6" gene_name "SMAD4"; gene_biotype "protein_coding"; oId "lv:circSMAD4-2769-004|ce:circSMAD4-6332-008"; tissue "lv|ce";
18	ncSplice	exon	44159783	44159833	.	+	.	gene_id "ENSMMUG00000018334"; transcript_id "rmCircRNA-260"; exon_number "7" gene_name "SMAD4"; gene_biotype "protein_coding"; oId "lv:circSMAD4-2769-004|ce:circSMAD4-6332-008"; tissue "lv|ce";
18	ncSplice	exon	44169690	44169873	.	+	.	gene_id "ENSMMUG00000018334"; transcript_id "rmCircRNA-260"; exon_number "8" gene_name "SMAD4"; gene_biotype "protein_coding"; oId "lv:circSMAD4-2769-004|ce:circSMAD4-6332-008"; tissue "lv|ce";
18	ncSplice	exon	44171265	44171433	.	+	.	gene_id "ENSMMUG00000018334"; transcript_id "rmCircRNA-260"; exon_number "9" gene_name "SMAD4"; gene_biotype "protein_coding"; oId "lv:circSMAD4-2769-004|ce:circSMAD4-6332-008"; tissue "lv|ce";
18	ncSplice	gene	4517242	4522387	.	-	.	gene_id "ENSMMUG00000015014"; gene_name "VAPA"; gene_source "ncSplice"; gene_biotype "protein_coding";
18	ncSplice	transcript	4517242	4522387	.	-	.	gene_id "ENSMMUG00000015014"; transcript_id "rmCircRNA-261"; gene_name "VAPA"; gene_biotype "protein_coding"; transcript_biotype "circRNA"; oId "lv:circVAPA-2772-001|ce:circVAPA-6336-002"; tissue "lv|ce";
18	ncSplice	exon	4517242	4517322	.	-	.	gene_id "ENSMMUG00000015014"; transcript_id "rmCircRNA-261"; exon_number "1" gene_name "VAPA"; gene_biotype "protein_coding"; oId "lv:circVAPA-2772-001|ce:circVAPA-6336-002"; tissue "lv|ce";
18	ncSplice	exon	4518366	4518469	.	-	.	gene_id "ENSMMUG00000015014"; transcript_id "rmCircRNA-261"; exon_number "2" gene_name "VAPA"; gene_biotype "protein_coding"; oId "lv:circVAPA-2772-001|ce:circVAPA-6336-002"; tissue "lv|ce";
18	ncSplice	exon	4522235	4522387	.	-	.	gene_id "ENSMMUG00000015014"; transcript_id "rmCircRNA-261"; exon_number "3" gene_name "VAPA"; gene_biotype "protein_coding"; oId "lv:circVAPA-2772-001|ce:circVAPA-6336-002"; tissue "lv|ce";
18	ncSplice	gene	4860154	4872600	.	+	.	gene_id "ENSMMUG00000019525"; gene_name "PPP4R1"; gene_source "ncSplice"; gene_biotype "protein_coding";
18	ncSplice	transcript	4860154	4872600	.	+	.	gene_id "ENSMMUG00000019525"; transcript_id "rmCircRNA-262"; gene_name "PPP4R1"; gene_biotype "protein_coding"; transcript_biotype "circRNA"; oId "lv:circPPP4R1-2780-001|ce:circPPP4R1-6350-001|ts:circPPP4R1-5183-001"; tissue "lv|ce|ts";
18	ncSplice	exon	4860154	4860289	.	+	.	gene_id "ENSMMUG00000019525"; transcript_id "rmCircRNA-262"; exon_number "1" gene_name "PPP4R1"; gene_biotype "protein_coding"; oId "lv:circPPP4R1-2780-001|ce:circPPP4R1-6350-001|ts:circPPP4R1-5183-001"; tissue "lv|ce|ts";
18	ncSplice	exon	4861506	4861612	.	+	.	gene_id "ENSMMUG00000019525"; transcript_id "rmCircRNA-262"; exon_number "2" gene_name "PPP4R1"; gene_biotype "protein_coding"; oId "lv:circPPP4R1-2780-001|ce:circPPP4R1-6350-001|ts:circPPP4R1-5183-001"; tissue "lv|ce|ts";
18	ncSplice	exon	4866874	4867016	.	+	.	gene_id "ENSMMUG00000019525"; transcript_id "rmCircRNA-262"; exon_number "3" gene_name "PPP4R1"; gene_biotype "protein_coding"; oId "lv:circPPP4R1-2780-001|ce:circPPP4R1-6350-001|ts:circPPP4R1-5183-001"; tissue "lv|ce|ts";
18	ncSplice	exon	4867510	4867656	.	+	.	gene_id "ENSMMUG00000019525"; transcript_id "rmCircRNA-262"; exon_number "4" gene_name "PPP4R1"; gene_biotype "protein_coding"; oId "lv:circPPP4R1-2780-001|ce:circPPP4R1-6350-001|ts:circPPP4R1-5183-001"; tissue "lv|ce|ts";
18	ncSplice	exon	4871164	4871271	.	+	.	gene_id "ENSMMUG00000019525"; transcript_id "rmCircRNA-262"; exon_number "5" gene_name "PPP4R1"; gene_biotype "protein_coding"; oId "lv:circPPP4R1-2780-001|ce:circPPP4R1-6350-001|ts:circPPP4R1-5183-001"; tissue "lv|ce|ts";
18	ncSplice	exon	4871402	4871467	.	+	.	gene_id "ENSMMUG00000019525"; transcript_id "rmCircRNA-262"; exon_number "6" gene_name "PPP4R1"; gene_biotype "protein_coding"; oId "lv:circPPP4R1-2780-001|ce:circPPP4R1-6350-001|ts:circPPP4R1-5183-001"; tissue "lv|ce|ts";
18	ncSplice	exon	4872442	4872600	.	+	.	gene_id "ENSMMUG00000019525"; transcript_id "rmCircRNA-262"; exon_number "7" gene_name "PPP4R1"; gene_biotype "protein_coding"; oId "lv:circPPP4R1-2780-001|ce:circPPP4R1-6350-001|ts:circPPP4R1-5183-001"; tissue "lv|ce|ts";
18	ncSplice	gene	5193898	5220680	.	-	.	gene_id "ENSMMUG00000022097"; gene_name "ANKRD12"; gene_source "ncSplice"; gene_biotype "protein_coding";
18	ncSplice	transcript	5193898	5220680	.	-	.	gene_id "ENSMMUG00000022097"; transcript_id "rmCircRNA-263"; gene_name "ANKRD12"; gene_biotype "protein_coding"; transcript_biotype "circRNA"; oId "lv:circANKRD12-2792-002|ts:circANKRD12-5207-003"; tissue "lv|ts";
18	ncSplice	exon	5193898	5194045	.	-	.	gene_id "ENSMMUG00000022097"; transcript_id "rmCircRNA-263"; exon_number "1" gene_name "ANKRD12"; gene_biotype "protein_coding"; oId "lv:circANKRD12-2792-002|ts:circANKRD12-5207-003"; tissue "lv|ts";
18	ncSplice	exon	5199008	5199150	.	-	.	gene_id "ENSMMUG00000022097"; transcript_id "rmCircRNA-263"; exon_number "2" gene_name "ANKRD12"; gene_biotype "protein_coding"; oId "lv:circANKRD12-2792-002|ts:circANKRD12-5207-003"; tissue "lv|ts";
18	ncSplice	exon	5204052	5204252	.	-	.	gene_id "ENSMMUG00000022097"; transcript_id "rmCircRNA-263"; exon_number "3" gene_name "ANKRD12"; gene_biotype "protein_coding"; oId "lv:circANKRD12-2792-002|ts:circANKRD12-5207-003"; tissue "lv|ts";
18	ncSplice	exon	5206954	5207100	.	-	.	gene_id "ENSMMUG00000022097"; transcript_id "rmCircRNA-263"; exon_number "4" gene_name "ANKRD12"; gene_biotype "protein_coding"; oId "lv:circANKRD12-2792-002|ts:circANKRD12-5207-003"; tissue "lv|ts";
18	ncSplice	exon	5220533	5220680	.	-	.	gene_id "ENSMMUG00000022097"; transcript_id "rmCircRNA-263"; exon_number "5" gene_name "ANKRD12"; gene_biotype "protein_coding"; oId "lv:circANKRD12-2792-002|ts:circANKRD12-5207-003"; tissue "lv|ts";
18	ncSplice	gene	52215733	52236337	.	+	.	gene_id "ENSMMUG00000001245"; gene_name "NA"; gene_source "ncSplice"; gene_biotype "protein_coding";
18	ncSplice	transcript	52215733	52236337	.	+	.	gene_id "ENSMMUG00000001245"; transcript_id "rmCircRNA-264"; gene_name "NA"; gene_biotype "protein_coding"; transcript_biotype "circRNA"; oId "lv:circNA-2800-001|ce:circNA-6397-013|ts:circNA-5211-001"; tissue "lv|ce|ts";
18	ncSplice	exon	52215733	52215914	.	+	.	gene_id "ENSMMUG00000001245"; transcript_id "rmCircRNA-264"; exon_number "1" gene_name "NA"; gene_biotype "protein_coding"; oId "lv:circNA-2800-001|ce:circNA-6397-013|ts:circNA-5211-001"; tissue "lv|ce|ts";
18	ncSplice	exon	52221038	52221214	.	+	.	gene_id "ENSMMUG00000001245"; transcript_id "rmCircRNA-264"; exon_number "2" gene_name "NA"; gene_biotype "protein_coding"; oId "lv:circNA-2800-001|ce:circNA-6397-013|ts:circNA-5211-001"; tissue "lv|ce|ts";
18	ncSplice	exon	52229888	52230050	.	+	.	gene_id "ENSMMUG00000001245"; transcript_id "rmCircRNA-264"; exon_number "3" gene_name "NA"; gene_biotype "protein_coding"; oId "lv:circNA-2800-001|ce:circNA-6397-013|ts:circNA-5211-001"; tissue "lv|ce|ts";
18	ncSplice	exon	52236056	52236337	.	+	.	gene_id "ENSMMUG00000001245"; transcript_id "rmCircRNA-264"; exon_number "4" gene_name "NA"; gene_biotype "protein_coding"; oId "lv:circNA-2800-001|ce:circNA-6397-013|ts:circNA-5211-001"; tissue "lv|ce|ts";
18	ncSplice	gene	55910177	55920611	.	+	.	gene_id "ENSMMUG00000004434"; gene_name "ZCCHC2"; gene_source "ncSplice"; gene_biotype "protein_coding";
18	ncSplice	transcript	55910177	55920611	.	+	.	gene_id "ENSMMUG00000004434"; transcript_id "rmCircRNA-265"; gene_name "ZCCHC2"; gene_biotype "protein_coding"; transcript_biotype "circRNA"; oId "lv:circZCCHC2-2804-002"; tissue "lv";
18	ncSplice	exon	55910177	55910288	.	+	.	gene_id "ENSMMUG00000004434"; transcript_id "rmCircRNA-265"; exon_number "1" gene_name "ZCCHC2"; gene_biotype "protein_coding"; oId "lv:circZCCHC2-2804-002"; tissue "lv";
18	ncSplice	exon	55912982	55913058	.	+	.	gene_id "ENSMMUG00000004434"; transcript_id "rmCircRNA-265"; exon_number "2" gene_name "ZCCHC2"; gene_biotype "protein_coding"; oId "lv:circZCCHC2-2804-002"; tissue "lv";
18	ncSplice	exon	55915204	55915275	.	+	.	gene_id "ENSMMUG00000004434"; transcript_id "rmCircRNA-265"; exon_number "3" gene_name "ZCCHC2"; gene_biotype "protein_coding"; oId "lv:circZCCHC2-2804-002"; tissue "lv";
18	ncSplice	exon	55920499	55920611	.	+	.	gene_id "ENSMMUG00000004434"; transcript_id "rmCircRNA-265"; exon_number "4" gene_name "ZCCHC2"; gene_biotype "protein_coding"; oId "lv:circZCCHC2-2804-002"; tissue "lv";
18	ncSplice	gene	6213430	6244483	.	-	.	gene_id "ENSMMUG00000000768"; gene_name "PTPRM"; gene_source "ncSplice"; gene_biotype "protein_coding";
18	ncSplice	transcript	6213430	6244483	.	-	.	gene_id "ENSMMUG00000000768"; transcript_id "rmCircRNA-266"; gene_name "PTPRM"; gene_biotype "protein_coding"; transcript_biotype "circRNA"; oId "lv:circPTPRM-2814-002"; tissue "lv";
18	ncSplice	exon	6213430	6213562	.	-	.	gene_id "ENSMMUG00000000768"; transcript_id "rmCircRNA-266"; exon_number "1" gene_name "PTPRM"; gene_biotype "protein_coding"; oId "lv:circPTPRM-2814-002"; tissue "lv";
18	ncSplice	exon	6243152	6243188	.	-	.	gene_id "ENSMMUG00000000768"; transcript_id "rmCircRNA-266"; exon_number "2" gene_name "PTPRM"; gene_biotype "protein_coding"; oId "lv:circPTPRM-2814-002"; tissue "lv";
18	ncSplice	exon	6244210	6244483	.	-	.	gene_id "ENSMMUG00000000768"; transcript_id "rmCircRNA-266"; exon_number "3" gene_name "PTPRM"; gene_biotype "protein_coding"; oId "lv:circPTPRM-2814-002"; tissue "lv";
18	ncSplice	gene	70293359	70295884	.	+	.	gene_id "ENSMMUG00000011329"; gene_name "ZNF236"; gene_source "ncSplice"; gene_biotype "protein_coding";
18	ncSplice	transcript	70293359	70295884	.	+	.	gene_id "ENSMMUG00000011329"; transcript_id "rmCircRNA-267"; gene_name "ZNF236"; gene_biotype "protein_coding"; transcript_biotype "circRNA"; oId "lv:circZNF236-2825-001|ce:circZNF236-6464-001|ts:circZNF236-5270-001"; tissue "lv|ce|ts";
18	ncSplice	exon	70293359	70293501	.	+	.	gene_id "ENSMMUG00000011329"; transcript_id "rmCircRNA-267"; exon_number "1" gene_name "ZNF236"; gene_biotype "protein_coding"; oId "lv:circZNF236-2825-001|ce:circZNF236-6464-001|ts:circZNF236-5270-001"; tissue "lv|ce|ts";
18	ncSplice	exon	70295720	70295884	.	+	.	gene_id "ENSMMUG00000011329"; transcript_id "rmCircRNA-267"; exon_number "2" gene_name "ZNF236"; gene_biotype "protein_coding"; oId "lv:circZNF236-2825-001|ce:circZNF236-6464-001|ts:circZNF236-5270-001"; tissue "lv|ce|ts";
18	ncSplice	gene	72438949	72486949	.	+	.	gene_id "ENSMMUG00000021792"; gene_name "ATP9B"; gene_source "ncSplice"; gene_biotype "protein_coding";
18	ncSplice	transcript	72438949	72486949	.	+	.	gene_id "ENSMMUG00000021792"; transcript_id "rmCircRNA-268"; gene_name "ATP9B"; gene_biotype "protein_coding"; transcript_biotype "circRNA"; oId "lv:circATP9B-2833-001|ce:circATP9B-6485-019|ts:circATP9B-5288-005"; tissue "lv|ce|ts";
18	ncSplice	exon	72438949	72439057	.	+	.	gene_id "ENSMMUG00000021792"; transcript_id "rmCircRNA-268"; exon_number "1" gene_name "ATP9B"; gene_biotype "protein_coding"; oId "lv:circATP9B-2833-001|ce:circATP9B-6485-019|ts:circATP9B-5288-005"; tissue "lv|ce|ts";
18	ncSplice	exon	72456513	72456571	.	+	.	gene_id "ENSMMUG00000021792"; transcript_id "rmCircRNA-268"; exon_number "2" gene_name "ATP9B"; gene_biotype "protein_coding"; oId "lv:circATP9B-2833-001|ce:circATP9B-6485-019|ts:circATP9B-5288-005"; tissue "lv|ce|ts";
18	ncSplice	exon	72465548	72465599	.	+	.	gene_id "ENSMMUG00000021792"; transcript_id "rmCircRNA-268"; exon_number "3" gene_name "ATP9B"; gene_biotype "protein_coding"; oId "lv:circATP9B-2833-001|ce:circATP9B-6485-019|ts:circATP9B-5288-005"; tissue "lv|ce|ts";
18	ncSplice	exon	72486855	72486949	.	+	.	gene_id "ENSMMUG00000021792"; transcript_id "rmCircRNA-268"; exon_number "4" gene_name "ATP9B"; gene_biotype "protein_coding"; oId "lv:circATP9B-2833-001|ce:circATP9B-6485-019|ts:circATP9B-5288-005"; tissue "lv|ce|ts";
18	ncSplice	gene	72438949	72503708	.	+	.	gene_id "ENSMMUG00000021792"; gene_name "ATP9B"; gene_source "ncSplice"; gene_biotype "protein_coding";
18	ncSplice	transcript	72438949	72503708	.	+	.	gene_id "ENSMMUG00000021792"; transcript_id "rmCircRNA-269"; gene_name "ATP9B"; gene_biotype "protein_coding"; transcript_biotype "circRNA"; oId "lv:circATP9B-2834-001|ce:circATP9B-6486-044|ts:circATP9B-5289-022"; tissue "lv|ce|ts";
18	ncSplice	exon	72438949	72439057	.	+	.	gene_id "ENSMMUG00000021792"; transcript_id "rmCircRNA-269"; exon_number "1" gene_name "ATP9B"; gene_biotype "protein_coding"; oId "lv:circATP9B-2834-001|ce:circATP9B-6486-044|ts:circATP9B-5289-022"; tissue "lv|ce|ts";
18	ncSplice	exon	72456513	72456571	.	+	.	gene_id "ENSMMUG00000021792"; transcript_id "rmCircRNA-269"; exon_number "2" gene_name "ATP9B"; gene_biotype "protein_coding"; oId "lv:circATP9B-2834-001|ce:circATP9B-6486-044|ts:circATP9B-5289-022"; tissue "lv|ce|ts";
18	ncSplice	exon	72465548	72465599	.	+	.	gene_id "ENSMMUG00000021792"; transcript_id "rmCircRNA-269"; exon_number "3" gene_name "ATP9B"; gene_biotype "protein_coding"; oId "lv:circATP9B-2834-001|ce:circATP9B-6486-044|ts:circATP9B-5289-022"; tissue "lv|ce|ts";
18	ncSplice	exon	72486855	72486949	.	+	.	gene_id "ENSMMUG00000021792"; transcript_id "rmCircRNA-269"; exon_number "4" gene_name "ATP9B"; gene_biotype "protein_coding"; oId "lv:circATP9B-2834-001|ce:circATP9B-6486-044|ts:circATP9B-5289-022"; tissue "lv|ce|ts";
18	ncSplice	exon	72503628	72503708	.	+	.	gene_id "ENSMMUG00000021792"; transcript_id "rmCircRNA-269"; exon_number "5" gene_name "ATP9B"; gene_biotype "protein_coding"; oId "lv:circATP9B-2834-001|ce:circATP9B-6486-044|ts:circATP9B-5289-022"; tissue "lv|ce|ts";
18	ncSplice	gene	72438949	72517017	.	+	.	gene_id "ENSMMUG00000021792"; gene_name "ATP9B"; gene_source "ncSplice"; gene_biotype "protein_coding";
18	ncSplice	transcript	72438949	72517017	.	+	.	gene_id "ENSMMUG00000021792"; transcript_id "rmCircRNA-270"; gene_name "ATP9B"; gene_biotype "protein_coding"; transcript_biotype "circRNA"; oId "lv:circATP9B-2835-001|ce:circATP9B-6488-079|ts:circATP9B-5290-033"; tissue "lv|ce|ts";
18	ncSplice	exon	72438949	72439057	.	+	.	gene_id "ENSMMUG00000021792"; transcript_id "rmCircRNA-270"; exon_number "1" gene_name "ATP9B"; gene_biotype "protein_coding"; oId "lv:circATP9B-2835-001|ce:circATP9B-6488-079|ts:circATP9B-5290-033"; tissue "lv|ce|ts";
18	ncSplice	exon	72456513	72456571	.	+	.	gene_id "ENSMMUG00000021792"; transcript_id "rmCircRNA-270"; exon_number "2" gene_name "ATP9B"; gene_biotype "protein_coding"; oId "lv:circATP9B-2835-001|ce:circATP9B-6488-079|ts:circATP9B-5290-033"; tissue "lv|ce|ts";
18	ncSplice	exon	72465548	72465599	.	+	.	gene_id "ENSMMUG00000021792"; transcript_id "rmCircRNA-270"; exon_number "3" gene_name "ATP9B"; gene_biotype "protein_coding"; oId "lv:circATP9B-2835-001|ce:circATP9B-6488-079|ts:circATP9B-5290-033"; tissue "lv|ce|ts";
18	ncSplice	exon	72486855	72486949	.	+	.	gene_id "ENSMMUG00000021792"; transcript_id "rmCircRNA-270"; exon_number "4" gene_name "ATP9B"; gene_biotype "protein_coding"; oId "lv:circATP9B-2835-001|ce:circATP9B-6488-079|ts:circATP9B-5290-033"; tissue "lv|ce|ts";
18	ncSplice	exon	72503628	72503708	.	+	.	gene_id "ENSMMUG00000021792"; transcript_id "rmCircRNA-270"; exon_number "5" gene_name "ATP9B"; gene_biotype "protein_coding"; oId "lv:circATP9B-2835-001|ce:circATP9B-6488-079|ts:circATP9B-5290-033"; tissue "lv|ce|ts";
18	ncSplice	exon	72516942	72517017	.	+	.	gene_id "ENSMMUG00000021792"; transcript_id "rmCircRNA-270"; exon_number "6" gene_name "ATP9B"; gene_biotype "protein_coding"; oId "lv:circATP9B-2835-001|ce:circATP9B-6488-079|ts:circATP9B-5290-033"; tissue "lv|ce|ts";
18	ncSplice	gene	72438949	72524151	.	+	.	gene_id "ENSMMUG00000021792"; gene_name "ATP9B"; gene_source "ncSplice"; gene_biotype "protein_coding";
18	ncSplice	transcript	72438949	72524151	.	+	.	gene_id "ENSMMUG00000021792"; transcript_id "rmCircRNA-271"; gene_name "ATP9B"; gene_biotype "protein_coding"; transcript_biotype "circRNA"; oId "lv:circATP9B-2836-002|ts:circATP9B-5291-055"; tissue "lv|ts";
18	ncSplice	exon	72438949	72439057	.	+	.	gene_id "ENSMMUG00000021792"; transcript_id "rmCircRNA-271"; exon_number "1" gene_name "ATP9B"; gene_biotype "protein_coding"; oId "lv:circATP9B-2836-002|ts:circATP9B-5291-055"; tissue "lv|ts";
18	ncSplice	exon	72456513	72456571	.	+	.	gene_id "ENSMMUG00000021792"; transcript_id "rmCircRNA-271"; exon_number "2" gene_name "ATP9B"; gene_biotype "protein_coding"; oId "lv:circATP9B-2836-002|ts:circATP9B-5291-055"; tissue "lv|ts";
18	ncSplice	exon	72465548	72465599	.	+	.	gene_id "ENSMMUG00000021792"; transcript_id "rmCircRNA-271"; exon_number "3" gene_name "ATP9B"; gene_biotype "protein_coding"; oId "lv:circATP9B-2836-002|ts:circATP9B-5291-055"; tissue "lv|ts";
18	ncSplice	exon	72486855	72486949	.	+	.	gene_id "ENSMMUG00000021792"; transcript_id "rmCircRNA-271"; exon_number "4" gene_name "ATP9B"; gene_biotype "protein_coding"; oId "lv:circATP9B-2836-002|ts:circATP9B-5291-055"; tissue "lv|ts";
18	ncSplice	exon	72503628	72503708	.	+	.	gene_id "ENSMMUG00000021792"; transcript_id "rmCircRNA-271"; exon_number "5" gene_name "ATP9B"; gene_biotype "protein_coding"; oId "lv:circATP9B-2836-002|ts:circATP9B-5291-055"; tissue "lv|ts";
18	ncSplice	exon	72516942	72517017	.	+	.	gene_id "ENSMMUG00000021792"; transcript_id "rmCircRNA-271"; exon_number "6" gene_name "ATP9B"; gene_biotype "protein_coding"; oId "lv:circATP9B-2836-002|ts:circATP9B-5291-055"; tissue "lv|ts";
18	ncSplice	exon	72524075	72524151	.	+	.	gene_id "ENSMMUG00000021792"; transcript_id "rmCircRNA-271"; exon_number "7" gene_name "ATP9B"; gene_biotype "protein_coding"; oId "lv:circATP9B-2836-002|ts:circATP9B-5291-055"; tissue "lv|ts";
18	ncSplice	gene	72632465	72633735	.	+	.	gene_id "ENSMMUG00000021792"; gene_name "ATP9B"; gene_source "ncSplice"; gene_biotype "protein_coding";
18	ncSplice	transcript	72632465	72633735	.	+	.	gene_id "ENSMMUG00000021792"; transcript_id "rmCircRNA-272"; gene_name "ATP9B"; gene_biotype "protein_coding"; transcript_biotype "circRNA"; oId "lv:circATP9B-2842-001|ce:circATP9B-6510-001|ts:circATP9B-5309-001"; tissue "lv|ce|ts";
18	ncSplice	exon	72632465	72633510	.	+	.	gene_id "ENSMMUG00000021792"; transcript_id "rmCircRNA-272"; exon_number "1" gene_name "ATP9B"; gene_biotype "protein_coding"; oId "lv:circATP9B-2842-001|ce:circATP9B-6510-001|ts:circATP9B-5309-001"; tissue "lv|ce|ts";
18	ncSplice	exon	72633643	72633735	.	+	.	gene_id "ENSMMUG00000021792"; transcript_id "rmCircRNA-272"; exon_number "2" gene_name "ATP9B"; gene_biotype "protein_coding"; oId "lv:circATP9B-2842-001|ce:circATP9B-6510-001|ts:circATP9B-5309-001"; tissue "lv|ce|ts";
19	ncSplice	gene	11552088	11553234	.	-	.	gene_id "ENSMMUG00000008815"; gene_name "ZNF823"; gene_source "ncSplice"; gene_biotype "protein_coding";
19	ncSplice	transcript	11552088	11553234	.	-	.	gene_id "ENSMMUG00000008815"; transcript_id "rmCircRNA-273"; gene_name "ZNF823"; gene_biotype "protein_coding"; transcript_biotype "circRNA"; oId "lv:circZNF823-2865-001"; tissue "lv";
19	ncSplice	exon	11552088	11552148	.	-	.	gene_id "ENSMMUG00000008815"; transcript_id "rmCircRNA-273"; exon_number "1" gene_name "ZNF823"; gene_biotype "protein_coding"; oId "lv:circZNF823-2865-001"; tissue "lv";
19	ncSplice	exon	11553108	11553234	.	-	.	gene_id "ENSMMUG00000008815"; transcript_id "rmCircRNA-273"; exon_number "2" gene_name "ZNF823"; gene_biotype "protein_coding"; oId "lv:circZNF823-2865-001"; tissue "lv";
19	ncSplice	gene	12599229	12599734	.	-	.	gene_id "ENSMMUG00000004390"; gene_name "FARSA"; gene_source "ncSplice"; gene_biotype "protein_coding";
19	ncSplice	transcript	12599229	12599734	.	-	.	gene_id "ENSMMUG00000004390"; transcript_id "rmCircRNA-274"; gene_name "FARSA"; gene_biotype "protein_coding"; transcript_biotype "circRNA"; oId "lv:circFARSA-2871-001|ce:circFARSA-6570-001|ts:circFARSA-5367-001"; tissue "lv|ce|ts";
19	ncSplice	exon	12599229	12599344	.	-	.	gene_id "ENSMMUG00000004390"; transcript_id "rmCircRNA-274"; exon_number "1" gene_name "FARSA"; gene_biotype "protein_coding"; oId "lv:circFARSA-2871-001|ce:circFARSA-6570-001|ts:circFARSA-5367-001"; tissue "lv|ce|ts";
19	ncSplice	exon	12599422	12599550	.	-	.	gene_id "ENSMMUG00000004390"; transcript_id "rmCircRNA-274"; exon_number "2" gene_name "FARSA"; gene_biotype "protein_coding"; oId "lv:circFARSA-2871-001|ce:circFARSA-6570-001|ts:circFARSA-5367-001"; tissue "lv|ce|ts";
19	ncSplice	exon	12599642	12599734	.	-	.	gene_id "ENSMMUG00000004390"; transcript_id "rmCircRNA-274"; exon_number "3" gene_name "FARSA"; gene_biotype "protein_coding"; oId "lv:circFARSA-2871-001|ce:circFARSA-6570-001|ts:circFARSA-5367-001"; tissue "lv|ce|ts";
1	ncSplice	gene	91909762	91915291	.	-	.	gene_id "ENSMMUG00000000663"; gene_name "GBP6"; gene_source "ncSplice"; gene_biotype "protein_coding";
1	ncSplice	transcript	91909762	91915291	.	-	.	gene_id "ENSMMUG00000000663"; transcript_id "rmCircRNA-275"; gene_name "GBP6"; gene_biotype "protein_coding"; transcript_biotype "circRNA"; oId "lv:circGBP6-2889-001"; tissue "lv";
1	ncSplice	exon	91909762	91909974	.	-	.	gene_id "ENSMMUG00000000663"; transcript_id "rmCircRNA-275"; exon_number "1" gene_name "GBP6"; gene_biotype "protein_coding"; oId "lv:circGBP6-2889-001"; tissue "lv";
1	ncSplice	exon	91911808	91912088	.	-	.	gene_id "ENSMMUG00000000663"; transcript_id "rmCircRNA-275"; exon_number "2" gene_name "GBP6"; gene_biotype "protein_coding"; oId "lv:circGBP6-2889-001"; tissue "lv";
1	ncSplice	exon	91912845	91913090	.	-	.	gene_id "ENSMMUG00000000663"; transcript_id "rmCircRNA-275"; exon_number "3" gene_name "GBP6"; gene_biotype "protein_coding"; oId "lv:circGBP6-2889-001"; tissue "lv";
1	ncSplice	exon	91914782	91914978	.	-	.	gene_id "ENSMMUG00000000663"; transcript_id "rmCircRNA-275"; exon_number "4" gene_name "GBP6"; gene_biotype "protein_coding"; oId "lv:circGBP6-2889-001"; tissue "lv";
1	ncSplice	exon	91915182	91915291	.	-	.	gene_id "ENSMMUG00000000663"; transcript_id "rmCircRNA-275"; exon_number "5" gene_name "GBP6"; gene_biotype "protein_coding"; oId "lv:circGBP6-2889-001"; tissue "lv";
19	ncSplice	gene	39606336	39620536	.	+	.	gene_id "ENSMMUG00000011790"; gene_name "GPATCH1"; gene_source "ncSplice"; gene_biotype "protein_coding";
19	ncSplice	transcript	39606336	39620536	.	+	.	gene_id "ENSMMUG00000011790"; transcript_id "rmCircRNA-276"; gene_name "GPATCH1"; gene_biotype "protein_coding"; transcript_biotype "circRNA"; oId "lv:circGPATCH1-2899-001|ts:circGPATCH1-5434-003"; tissue "lv|ts";
19	ncSplice	exon	39606336	39606470	.	+	.	gene_id "ENSMMUG00000011790"; transcript_id "rmCircRNA-276"; exon_number "1" gene_name "GPATCH1"; gene_biotype "protein_coding"; oId "lv:circGPATCH1-2899-001|ts:circGPATCH1-5434-003"; tissue "lv|ts";
19	ncSplice	exon	39609638	39609723	.	+	.	gene_id "ENSMMUG00000011790"; transcript_id "rmCircRNA-276"; exon_number "2" gene_name "GPATCH1"; gene_biotype "protein_coding"; oId "lv:circGPATCH1-2899-001|ts:circGPATCH1-5434-003"; tissue "lv|ts";
19	ncSplice	exon	39612129	39612289	.	+	.	gene_id "ENSMMUG00000011790"; transcript_id "rmCircRNA-276"; exon_number "3" gene_name "GPATCH1"; gene_biotype "protein_coding"; oId "lv:circGPATCH1-2899-001|ts:circGPATCH1-5434-003"; tissue "lv|ts";
19	ncSplice	exon	39612929	39613026	.	+	.	gene_id "ENSMMUG00000011790"; transcript_id "rmCircRNA-276"; exon_number "4" gene_name "GPATCH1"; gene_biotype "protein_coding"; oId "lv:circGPATCH1-2899-001|ts:circGPATCH1-5434-003"; tissue "lv|ts";
19	ncSplice	exon	39614586	39614644	.	+	.	gene_id "ENSMMUG00000011790"; transcript_id "rmCircRNA-276"; exon_number "5" gene_name "GPATCH1"; gene_biotype "protein_coding"; oId "lv:circGPATCH1-2899-001|ts:circGPATCH1-5434-003"; tissue "lv|ts";
19	ncSplice	exon	39615034	39615273	.	+	.	gene_id "ENSMMUG00000011790"; transcript_id "rmCircRNA-276"; exon_number "6" gene_name "GPATCH1"; gene_biotype "protein_coding"; oId "lv:circGPATCH1-2899-001|ts:circGPATCH1-5434-003"; tissue "lv|ts";
19	ncSplice	exon	39616254	39616401	.	+	.	gene_id "ENSMMUG00000011790"; transcript_id "rmCircRNA-276"; exon_number "7" gene_name "GPATCH1"; gene_biotype "protein_coding"; oId "lv:circGPATCH1-2899-001|ts:circGPATCH1-5434-003"; tissue "lv|ts";
19	ncSplice	exon	39620457	39620536	.	+	.	gene_id "ENSMMUG00000011790"; transcript_id "rmCircRNA-276"; exon_number "8" gene_name "GPATCH1"; gene_biotype "protein_coding"; oId "lv:circGPATCH1-2899-001|ts:circGPATCH1-5434-003"; tissue "lv|ts";
19	ncSplice	gene	46611649	46619795	.	-	.	gene_id "ENSMMUG00000003621"; gene_name "AKT2"; gene_source "ncSplice"; gene_biotype "protein_coding";
19	ncSplice	transcript	46611649	46619795	.	-	.	gene_id "ENSMMUG00000003621"; transcript_id "rmCircRNA-277"; gene_name "AKT2"; gene_biotype "protein_coding"; transcript_biotype "circRNA"; oId "lv:circAKT2-2925-001"; tissue "lv";
19	ncSplice	exon	46611649	46611760	.	-	.	gene_id "ENSMMUG00000003621"; transcript_id "rmCircRNA-277"; exon_number "1" gene_name "AKT2"; gene_biotype "protein_coding"; oId "lv:circAKT2-2925-001"; tissue "lv";
19	ncSplice	exon	46613420	46613548	.	-	.	gene_id "ENSMMUG00000003621"; transcript_id "rmCircRNA-277"; exon_number "2" gene_name "AKT2"; gene_biotype "protein_coding"; oId "lv:circAKT2-2925-001"; tissue "lv";
19	ncSplice	exon	46619666	46619795	.	-	.	gene_id "ENSMMUG00000003621"; transcript_id "rmCircRNA-277"; exon_number "3" gene_name "AKT2"; gene_biotype "protein_coding"; oId "lv:circAKT2-2925-001"; tissue "lv";
19	ncSplice	gene	54199588	54209371	.	-	.	gene_id "ENSMMUG00000000047"; gene_name "SULT2A1"; gene_source "ncSplice"; gene_biotype "protein_coding";
19	ncSplice	transcript	54199588	54209371	.	-	.	gene_id "ENSMMUG00000000047"; transcript_id "rmCircRNA-278"; gene_name "SULT2A1"; gene_biotype "protein_coding"; transcript_biotype "circRNA"; oId "lv:circSULT2A1-2947-001"; tissue "lv";
19	ncSplice	exon	54199588	54199765	.	-	.	gene_id "ENSMMUG00000000047"; transcript_id "rmCircRNA-278"; exon_number "1" gene_name "SULT2A1"; gene_biotype "protein_coding"; oId "lv:circSULT2A1-2947-001"; tissue "lv";
19	ncSplice	exon	54204375	54204469	.	-	.	gene_id "ENSMMUG00000000047"; transcript_id "rmCircRNA-278"; exon_number "2" gene_name "SULT2A1"; gene_biotype "protein_coding"; oId "lv:circSULT2A1-2947-001"; tissue "lv";
19	ncSplice	exon	54205530	54209371	.	-	.	gene_id "ENSMMUG00000000047"; transcript_id "rmCircRNA-278"; exon_number "3" gene_name "SULT2A1"; gene_biotype "protein_coding"; oId "lv:circSULT2A1-2947-001"; tissue "lv";
19	ncSplice	gene	5551830	5554985	.	+	.	gene_id "ENSMMUG00000017970"; gene_name "SAFB"; gene_source "ncSplice"; gene_biotype "protein_coding";
19	ncSplice	transcript	5551830	5554985	.	+	.	gene_id "ENSMMUG00000017970"; transcript_id "rmCircRNA-279"; gene_name "SAFB"; gene_biotype "protein_coding"; transcript_biotype "circRNA"; oId "lv:circSAFB-2955-001|ce:circSAFB-6766-001|ts:circSAFB-5520-001"; tissue "lv|ce|ts";
19	ncSplice	exon	5551830	5551924	.	+	.	gene_id "ENSMMUG00000017970"; transcript_id "rmCircRNA-279"; exon_number "1" gene_name "SAFB"; gene_biotype "protein_coding"; oId "lv:circSAFB-2955-001|ce:circSAFB-6766-001|ts:circSAFB-5520-001"; tissue "lv|ce|ts";
19	ncSplice	exon	5553949	5554098	.	+	.	gene_id "ENSMMUG00000017970"; transcript_id "rmCircRNA-279"; exon_number "2" gene_name "SAFB"; gene_biotype "protein_coding"; oId "lv:circSAFB-2955-001|ce:circSAFB-6766-001|ts:circSAFB-5520-001"; tissue "lv|ce|ts";
19	ncSplice	exon	5554177	5554259	.	+	.	gene_id "ENSMMUG00000017970"; transcript_id "rmCircRNA-279"; exon_number "3" gene_name "SAFB"; gene_biotype "protein_coding"; oId "lv:circSAFB-2955-001|ce:circSAFB-6766-001|ts:circSAFB-5520-001"; tissue "lv|ce|ts";
19	ncSplice	exon	5554592	5554731	.	+	.	gene_id "ENSMMUG00000017970"; transcript_id "rmCircRNA-279"; exon_number "4" gene_name "SAFB"; gene_biotype "protein_coding"; oId "lv:circSAFB-2955-001|ce:circSAFB-6766-001|ts:circSAFB-5520-001"; tissue "lv|ce|ts";
19	ncSplice	exon	5554897	5554985	.	+	.	gene_id "ENSMMUG00000017970"; transcript_id "rmCircRNA-279"; exon_number "5" gene_name "SAFB"; gene_biotype "protein_coding"; oId "lv:circSAFB-2955-001|ce:circSAFB-6766-001|ts:circSAFB-5520-001"; tissue "lv|ce|ts";
1	ncSplice	gene	95579195	95598684	.	-	.	gene_id "ENSMMUG00000005070"; gene_name "EVI5"; gene_source "ncSplice"; gene_biotype "protein_coding";
1	ncSplice	transcript	95579195	95598684	.	-	.	gene_id "ENSMMUG00000005070"; transcript_id "rmCircRNA-280"; gene_name "EVI5"; gene_biotype "protein_coding"; transcript_biotype "circRNA"; oId "lv:circEVI5-2960-001|ts:circEVI5-5525-001"; tissue "lv|ts";
1	ncSplice	exon	95579195	95579290	.	-	.	gene_id "ENSMMUG00000005070"; transcript_id "rmCircRNA-280"; exon_number "1" gene_name "EVI5"; gene_biotype "protein_coding"; oId "lv:circEVI5-2960-001|ts:circEVI5-5525-001"; tissue "lv|ts";
1	ncSplice	exon	95581446	95581592	.	-	.	gene_id "ENSMMUG00000005070"; transcript_id "rmCircRNA-280"; exon_number "2" gene_name "EVI5"; gene_biotype "protein_coding"; oId "lv:circEVI5-2960-001|ts:circEVI5-5525-001"; tissue "lv|ts";
1	ncSplice	exon	95596948	95597106	.	-	.	gene_id "ENSMMUG00000005070"; transcript_id "rmCircRNA-280"; exon_number "3" gene_name "EVI5"; gene_biotype "protein_coding"; oId "lv:circEVI5-2960-001|ts:circEVI5-5525-001"; tissue "lv|ts";
1	ncSplice	exon	95598544	95598684	.	-	.	gene_id "ENSMMUG00000005070"; transcript_id "rmCircRNA-280"; exon_number "4" gene_name "EVI5"; gene_biotype "protein_coding"; oId "lv:circEVI5-2960-001|ts:circEVI5-5525-001"; tissue "lv|ts";
19	ncSplice	gene	6593064	6593514	.	-	.	gene_id "ENSMMUG00000028911"; gene_name "NA"; gene_source "ncSplice"; gene_biotype "protein_coding";
19	ncSplice	transcript	6593064	6593514	.	-	.	gene_id "ENSMMUG00000028911"; transcript_id "rmCircRNA-281"; gene_name "NA"; gene_biotype "protein_coding"; transcript_biotype "circRNA"; oId "lv:circNA-2982-001"; tissue "lv";
19	ncSplice	exon	6593064	6593276	.	-	.	gene_id "ENSMMUG00000028911"; transcript_id "rmCircRNA-281"; exon_number "1" gene_name "NA"; gene_biotype "protein_coding"; oId "lv:circNA-2982-001"; tissue "lv";
19	ncSplice	exon	6593372	6593514	.	-	.	gene_id "ENSMMUG00000028911"; transcript_id "rmCircRNA-281"; exon_number "2" gene_name "NA"; gene_biotype "protein_coding"; oId "lv:circNA-2982-001"; tissue "lv";
19	ncSplice	gene	6605007	6606444	.	-	.	gene_id "19:6605006:6606444:-1"; gene_name "19:6605006:6606444:-1"; gene_source "ncSplice"; gene_biotype "novel";
19	ncSplice	transcript	6605007	6606444	.	-	.	gene_id "19:6605006:6606444:-1"; transcript_id "rmCircRNA-282"; gene_name "19:6605006:6606444:-1"; gene_biotype "novel"; transcript_biotype "circRNA"; oId "lv:circ19:6605006:6606444:-1-2984-001"; tissue "lv";
19	ncSplice	exon	6605007	6605095	.	-	.	gene_id "19:6605006:6606444:-1"; transcript_id "rmCircRNA-282"; exon_number "1" gene_name "19:6605006:6606444:-1"; gene_biotype "novel"; oId "lv:circ19:6605006:6606444:-1-2984-001"; tissue "lv";
19	ncSplice	exon	6606395	6606444	.	-	.	gene_id "19:6605006:6606444:-1"; transcript_id "rmCircRNA-282"; exon_number "2" gene_name "19:6605006:6606444:-1"; gene_biotype "novel"; oId "lv:circ19:6605006:6606444:-1-2984-001"; tissue "lv";
1	ncSplice	gene	97217882	97230300	.	-	.	gene_id "ENSMMUG00000006369"; gene_name "ARHGAP29"; gene_source "ncSplice"; gene_biotype "protein_coding";
1	ncSplice	transcript	97217882	97230300	.	-	.	gene_id "ENSMMUG00000006369"; transcript_id "rmCircRNA-283"; gene_name "ARHGAP29"; gene_biotype "protein_coding"; transcript_biotype "circRNA"; oId "lv:circARHGAP29-2988-003"; tissue "lv";
1	ncSplice	exon	97217882	97218016	.	-	.	gene_id "ENSMMUG00000006369"; transcript_id "rmCircRNA-283"; exon_number "1" gene_name "ARHGAP29"; gene_biotype "protein_coding"; oId "lv:circARHGAP29-2988-003"; tissue "lv";
1	ncSplice	exon	97228340	97228451	.	-	.	gene_id "ENSMMUG00000006369"; transcript_id "rmCircRNA-283"; exon_number "2" gene_name "ARHGAP29"; gene_biotype "protein_coding"; oId "lv:circARHGAP29-2988-003"; tissue "lv";
1	ncSplice	exon	97230064	97230300	.	-	.	gene_id "ENSMMUG00000006369"; transcript_id "rmCircRNA-283"; exon_number "3" gene_name "ARHGAP29"; gene_biotype "protein_coding"; oId "lv:circARHGAP29-2988-003"; tissue "lv";
1	ncSplice	gene	98173778	98183127	.	+	.	gene_id "ENSMMUG00000004758"; gene_name "TMEM56"; gene_source "ncSplice"; gene_biotype "protein_coding";
1	ncSplice	transcript	98173778	98183127	.	+	.	gene_id "ENSMMUG00000004758"; transcript_id "rmCircRNA-284"; gene_name "TMEM56"; gene_biotype "protein_coding"; transcript_biotype "circRNA"; oId "lv:circTMEM56-2994-003"; tissue "lv";
1	ncSplice	exon	98173778	98173943	.	+	.	gene_id "ENSMMUG00000004758"; transcript_id "rmCircRNA-284"; exon_number "1" gene_name "TMEM56"; gene_biotype "protein_coding"; oId "lv:circTMEM56-2994-003"; tissue "lv";
1	ncSplice	exon	98178939	98179028	.	+	.	gene_id "ENSMMUG00000004758"; transcript_id "rmCircRNA-284"; exon_number "2" gene_name "TMEM56"; gene_biotype "protein_coding"; oId "lv:circTMEM56-2994-003"; tissue "lv";
1	ncSplice	exon	98181605	98181663	.	+	.	gene_id "ENSMMUG00000004758"; transcript_id "rmCircRNA-284"; exon_number "3" gene_name "TMEM56"; gene_biotype "protein_coding"; oId "lv:circTMEM56-2994-003"; tissue "lv";
1	ncSplice	exon	98183033	98183127	.	+	.	gene_id "ENSMMUG00000004758"; transcript_id "rmCircRNA-284"; exon_number "4" gene_name "TMEM56"; gene_biotype "protein_coding"; oId "lv:circTMEM56-2994-003"; tissue "lv";
1	ncSplice	gene	98173778	98202787	.	+	.	gene_id "ENSMMUG00000004758"; gene_name "TMEM56"; gene_source "ncSplice"; gene_biotype "protein_coding";
1	ncSplice	transcript	98173778	98202787	.	+	.	gene_id "ENSMMUG00000004758"; transcript_id "rmCircRNA-285"; gene_name "TMEM56"; gene_biotype "protein_coding"; transcript_biotype "circRNA"; oId "lv:circTMEM56-2995-004|ce:circTMEM56-6854-001|ts:circTMEM56-5604-001"; tissue "lv|ce|ts";
1	ncSplice	exon	98173778	98173943	.	+	.	gene_id "ENSMMUG00000004758"; transcript_id "rmCircRNA-285"; exon_number "1" gene_name "TMEM56"; gene_biotype "protein_coding"; oId "lv:circTMEM56-2995-004|ce:circTMEM56-6854-001|ts:circTMEM56-5604-001"; tissue "lv|ce|ts";
1	ncSplice	exon	98178939	98179028	.	+	.	gene_id "ENSMMUG00000004758"; transcript_id "rmCircRNA-285"; exon_number "2" gene_name "TMEM56"; gene_biotype "protein_coding"; oId "lv:circTMEM56-2995-004|ce:circTMEM56-6854-001|ts:circTMEM56-5604-001"; tissue "lv|ce|ts";
1	ncSplice	exon	98181605	98181663	.	+	.	gene_id "ENSMMUG00000004758"; transcript_id "rmCircRNA-285"; exon_number "3" gene_name "TMEM56"; gene_biotype "protein_coding"; oId "lv:circTMEM56-2995-004|ce:circTMEM56-6854-001|ts:circTMEM56-5604-001"; tissue "lv|ce|ts";
1	ncSplice	exon	98183033	98183127	.	+	.	gene_id "ENSMMUG00000004758"; transcript_id "rmCircRNA-285"; exon_number "4" gene_name "TMEM56"; gene_biotype "protein_coding"; oId "lv:circTMEM56-2995-004|ce:circTMEM56-6854-001|ts:circTMEM56-5604-001"; tissue "lv|ce|ts";
1	ncSplice	exon	98202714	98202787	.	+	.	gene_id "ENSMMUG00000004758"; transcript_id "rmCircRNA-285"; exon_number "5" gene_name "TMEM56"; gene_biotype "protein_coding"; oId "lv:circTMEM56-2995-004|ce:circTMEM56-6854-001|ts:circTMEM56-5604-001"; tissue "lv|ce|ts";
1	ncSplice	gene	98178939	98202787	.	+	.	gene_id "ENSMMUG00000004758"; gene_name "TMEM56"; gene_source "ncSplice"; gene_biotype "protein_coding";
1	ncSplice	transcript	98178939	98202787	.	+	.	gene_id "ENSMMUG00000004758"; transcript_id "rmCircRNA-286"; gene_name "TMEM56"; gene_biotype "protein_coding"; transcript_biotype "circRNA"; oId "lv:circTMEM56-2998-001|ce:circTMEM56-6857-001"; tissue "lv|ce";
1	ncSplice	exon	98178939	98179028	.	+	.	gene_id "ENSMMUG00000004758"; transcript_id "rmCircRNA-286"; exon_number "1" gene_name "TMEM56"; gene_biotype "protein_coding"; oId "lv:circTMEM56-2998-001|ce:circTMEM56-6857-001"; tissue "lv|ce";
1	ncSplice	exon	98181605	98181663	.	+	.	gene_id "ENSMMUG00000004758"; transcript_id "rmCircRNA-286"; exon_number "2" gene_name "TMEM56"; gene_biotype "protein_coding"; oId "lv:circTMEM56-2998-001|ce:circTMEM56-6857-001"; tissue "lv|ce";
1	ncSplice	exon	98183033	98183127	.	+	.	gene_id "ENSMMUG00000004758"; transcript_id "rmCircRNA-286"; exon_number "3" gene_name "TMEM56"; gene_biotype "protein_coding"; oId "lv:circTMEM56-2998-001|ce:circTMEM56-6857-001"; tissue "lv|ce";
1	ncSplice	exon	98202714	98202787	.	+	.	gene_id "ENSMMUG00000004758"; transcript_id "rmCircRNA-286"; exon_number "4" gene_name "TMEM56"; gene_biotype "protein_coding"; oId "lv:circTMEM56-2998-001|ce:circTMEM56-6857-001"; tissue "lv|ce";
19	ncSplice	gene	8442773	8451446	.	+	.	gene_id "ENSMMUG00000018806"; gene_name "HNRNPM"; gene_source "ncSplice"; gene_biotype "protein_coding";
19	ncSplice	transcript	8442773	8451446	.	+	.	gene_id "ENSMMUG00000018806"; transcript_id "rmCircRNA-287"; gene_name "HNRNPM"; gene_biotype "protein_coding"; transcript_biotype "circRNA"; oId "lv:circHNRNPM-3001-001|ts:circHNRNPM-5611-001"; tissue "lv|ts";
19	ncSplice	exon	8442773	8442942	.	+	.	gene_id "ENSMMUG00000018806"; transcript_id "rmCircRNA-287"; exon_number "1" gene_name "HNRNPM"; gene_biotype "protein_coding"; oId "lv:circHNRNPM-3001-001|ts:circHNRNPM-5611-001"; tissue "lv|ts";
19	ncSplice	exon	8450294	8450346	.	+	.	gene_id "ENSMMUG00000018806"; transcript_id "rmCircRNA-287"; exon_number "2" gene_name "HNRNPM"; gene_biotype "protein_coding"; oId "lv:circHNRNPM-3001-001|ts:circHNRNPM-5611-001"; tissue "lv|ts";
19	ncSplice	exon	8451257	8451264	.	+	.	gene_id "ENSMMUG00000018806"; transcript_id "rmCircRNA-287"; exon_number "3" gene_name "HNRNPM"; gene_biotype "protein_coding"; oId "lv:circHNRNPM-3001-001|ts:circHNRNPM-5611-001"; tissue "lv|ts";
19	ncSplice	exon	8451353	8451446	.	+	.	gene_id "ENSMMUG00000018806"; transcript_id "rmCircRNA-287"; exon_number "4" gene_name "HNRNPM"; gene_biotype "protein_coding"; oId "lv:circHNRNPM-3001-001|ts:circHNRNPM-5611-001"; tissue "lv|ts";
19	ncSplice	gene	9873791	9874312	.	+	.	gene_id "ENSMMUG00000020076"; gene_name "NA"; gene_source "ncSplice"; gene_biotype "protein_coding";
19	ncSplice	transcript	9873791	9874312	.	+	.	gene_id "ENSMMUG00000020076"; transcript_id "rmCircRNA-288"; gene_name "NA"; gene_biotype "protein_coding"; transcript_biotype "circRNA"; oId "lv:circNA-3008-001"; tissue "lv";
19	ncSplice	exon	9873791	9873877	.	+	.	gene_id "ENSMMUG00000020076"; transcript_id "rmCircRNA-288"; exon_number "1" gene_name "NA"; gene_biotype "protein_coding"; oId "lv:circNA-3008-001"; tissue "lv";
19	ncSplice	exon	9873966	9874055	.	+	.	gene_id "ENSMMUG00000020076"; transcript_id "rmCircRNA-288"; exon_number "2" gene_name "NA"; gene_biotype "protein_coding"; oId "lv:circNA-3008-001"; tissue "lv";
19	ncSplice	exon	9874177	9874312	.	+	.	gene_id "ENSMMUG00000020076"; transcript_id "rmCircRNA-288"; exon_number "3" gene_name "NA"; gene_biotype "protein_coding"; oId "lv:circNA-3008-001"; tissue "lv";
20	ncSplice	gene	17830997	17835984	.	-	.	gene_id "ENSMMUG00000022441"; gene_name "NA"; gene_source "ncSplice"; gene_biotype "protein_coding";
20	ncSplice	transcript	17830997	17835984	.	-	.	gene_id "ENSMMUG00000022441"; transcript_id "rmCircRNA-289"; gene_name "NA"; gene_biotype "protein_coding"; transcript_biotype "circRNA"; oId "lv:circNA-3041-001|ce:circNA-6948-001|ts:circNA-5682-001"; tissue "lv|ce|ts";
20	ncSplice	exon	17830997	17831219	.	-	.	gene_id "ENSMMUG00000022441"; transcript_id "rmCircRNA-289"; exon_number "1" gene_name "NA"; gene_biotype "protein_coding"; oId "lv:circNA-3041-001|ce:circNA-6948-001|ts:circNA-5682-001"; tissue "lv|ce|ts";
20	ncSplice	exon	17833019	17833173	.	-	.	gene_id "ENSMMUG00000022441"; transcript_id "rmCircRNA-289"; exon_number "2" gene_name "NA"; gene_biotype "protein_coding"; oId "lv:circNA-3041-001|ce:circNA-6948-001|ts:circNA-5682-001"; tissue "lv|ce|ts";
20	ncSplice	exon	17833382	17833599	.	-	.	gene_id "ENSMMUG00000022441"; transcript_id "rmCircRNA-289"; exon_number "3" gene_name "NA"; gene_biotype "protein_coding"; oId "lv:circNA-3041-001|ce:circNA-6948-001|ts:circNA-5682-001"; tissue "lv|ce|ts";
20	ncSplice	exon	17834732	17834893	.	-	.	gene_id "ENSMMUG00000022441"; transcript_id "rmCircRNA-289"; exon_number "4" gene_name "NA"; gene_biotype "protein_coding"; oId "lv:circNA-3041-001|ce:circNA-6948-001|ts:circNA-5682-001"; tissue "lv|ce|ts";
20	ncSplice	exon	17835467	17835644	.	-	.	gene_id "ENSMMUG00000022441"; transcript_id "rmCircRNA-289"; exon_number "5" gene_name "NA"; gene_biotype "protein_coding"; oId "lv:circNA-3041-001|ce:circNA-6948-001|ts:circNA-5682-001"; tissue "lv|ce|ts";
20	ncSplice	exon	17835754	17835984	.	-	.	gene_id "ENSMMUG00000022441"; transcript_id "rmCircRNA-289"; exon_number "6" gene_name "NA"; gene_biotype "protein_coding"; oId "lv:circNA-3041-001|ce:circNA-6948-001|ts:circNA-5682-001"; tissue "lv|ce|ts";
20	ncSplice	gene	23227042	23256996	.	+	.	gene_id "ENSMMUG00000020428"; gene_name "TNRC6A"; gene_source "ncSplice"; gene_biotype "protein_coding";
20	ncSplice	transcript	23227042	23256996	.	+	.	gene_id "ENSMMUG00000020428"; transcript_id "rmCircRNA-290"; gene_name "TNRC6A"; gene_biotype "protein_coding"; transcript_biotype "circRNA"; oId "lv:circTNRC6A-3063-009|ce:circTNRC6A-6994-006|ts:circTNRC6A-5756-015"; tissue "lv|ce|ts";
20	ncSplice	exon	23227042	23227129	.	+	.	gene_id "ENSMMUG00000020428"; transcript_id "rmCircRNA-290"; exon_number "1" gene_name "TNRC6A"; gene_biotype "protein_coding"; oId "lv:circTNRC6A-3063-009|ce:circTNRC6A-6994-006|ts:circTNRC6A-5756-015"; tissue "lv|ce|ts";
20	ncSplice	exon	23234885	23234906	.	+	.	gene_id "ENSMMUG00000020428"; transcript_id "rmCircRNA-290"; exon_number "2" gene_name "TNRC6A"; gene_biotype "protein_coding"; oId "lv:circTNRC6A-3063-009|ce:circTNRC6A-6994-006|ts:circTNRC6A-5756-015"; tissue "lv|ce|ts";
20	ncSplice	exon	23256550	23256996	.	+	.	gene_id "ENSMMUG00000020428"; transcript_id "rmCircRNA-290"; exon_number "3" gene_name "TNRC6A"; gene_biotype "protein_coding"; oId "lv:circTNRC6A-3063-009|ce:circTNRC6A-6994-006|ts:circTNRC6A-5756-015"; tissue "lv|ce|ts";
20	ncSplice	gene	23274450	23285452	.	+	.	gene_id "ENSMMUG00000020428"; gene_name "TNRC6A"; gene_source "ncSplice"; gene_biotype "protein_coding";
20	ncSplice	transcript	23274450	23285452	.	+	.	gene_id "ENSMMUG00000020428"; transcript_id "rmCircRNA-291"; gene_name "TNRC6A"; gene_biotype "protein_coding"; transcript_biotype "circRNA"; oId "lv:circTNRC6A-3066-001"; tissue "lv";
20	ncSplice	exon	23274450	23274625	.	+	.	gene_id "ENSMMUG00000020428"; transcript_id "rmCircRNA-291"; exon_number "1" gene_name "TNRC6A"; gene_biotype "protein_coding"; oId "lv:circTNRC6A-3066-001"; tissue "lv";
20	ncSplice	exon	23275811	23275843	.	+	.	gene_id "ENSMMUG00000020428"; transcript_id "rmCircRNA-291"; exon_number "2" gene_name "TNRC6A"; gene_biotype "protein_coding"; oId "lv:circTNRC6A-3066-001"; tissue "lv";
20	ncSplice	exon	23277374	23277454	.	+	.	gene_id "ENSMMUG00000020428"; transcript_id "rmCircRNA-291"; exon_number "3" gene_name "TNRC6A"; gene_biotype "protein_coding"; oId "lv:circTNRC6A-3066-001"; tissue "lv";
20	ncSplice	exon	23277799	23277850	.	+	.	gene_id "ENSMMUG00000020428"; transcript_id "rmCircRNA-291"; exon_number "4" gene_name "TNRC6A"; gene_biotype "protein_coding"; oId "lv:circTNRC6A-3066-001"; tissue "lv";
20	ncSplice	exon	23284478	23284620	.	+	.	gene_id "ENSMMUG00000020428"; transcript_id "rmCircRNA-291"; exon_number "5" gene_name "TNRC6A"; gene_biotype "protein_coding"; oId "lv:circTNRC6A-3066-001"; tissue "lv";
20	ncSplice	exon	23285315	23285452	.	+	.	gene_id "ENSMMUG00000020428"; transcript_id "rmCircRNA-291"; exon_number "6" gene_name "TNRC6A"; gene_biotype "protein_coding"; oId "lv:circTNRC6A-3066-001"; tissue "lv";
20	ncSplice	gene	29367513	29459329	.	+	.	gene_id "ENSMMUG00000019716"; gene_name ""; gene_source "ncSplice"; gene_biotype "protein_coding";
20	ncSplice	transcript	29367513	29459329	.	+	.	gene_id "ENSMMUG00000019716"; transcript_id "rmCircRNA-292"; gene_name ""; gene_biotype "protein_coding"; transcript_biotype "circRNA"; oId "lv:circ-3078-002"; tissue "lv";
20	ncSplice	exon	29367513	29367630	.	+	.	gene_id "ENSMMUG00000019716"; transcript_id "rmCircRNA-292"; exon_number "1" gene_name ""; gene_biotype "protein_coding"; oId "lv:circ-3078-002"; tissue "lv";
20	ncSplice	exon	29372255	29372379	.	+	.	gene_id "ENSMMUG00000019716"; transcript_id "rmCircRNA-292"; exon_number "2" gene_name ""; gene_biotype "protein_coding"; oId "lv:circ-3078-002"; tissue "lv";
20	ncSplice	exon	29373142	29373287	.	+	.	gene_id "ENSMMUG00000019716"; transcript_id "rmCircRNA-292"; exon_number "3" gene_name ""; gene_biotype "protein_coding"; oId "lv:circ-3078-002"; tissue "lv";
20	ncSplice	exon	29374622	29374775	.	+	.	gene_id "ENSMMUG00000019716"; transcript_id "rmCircRNA-292"; exon_number "4" gene_name ""; gene_biotype "protein_coding"; oId "lv:circ-3078-002"; tissue "lv";
20	ncSplice	exon	29376827	29376977	.	+	.	gene_id "ENSMMUG00000019716"; transcript_id "rmCircRNA-292"; exon_number "5" gene_name ""; gene_biotype "protein_coding"; oId "lv:circ-3078-002"; tissue "lv";
20	ncSplice	exon	29377945	29378018	.	+	.	gene_id "ENSMMUG00000019716"; transcript_id "rmCircRNA-292"; exon_number "6" gene_name ""; gene_biotype "protein_coding"; oId "lv:circ-3078-002"; tissue "lv";
20	ncSplice	exon	29378197	29378326	.	+	.	gene_id "ENSMMUG00000019716"; transcript_id "rmCircRNA-292"; exon_number "7" gene_name ""; gene_biotype "protein_coding"; oId "lv:circ-3078-002"; tissue "lv";
20	ncSplice	exon	29379221	29379363	.	+	.	gene_id "ENSMMUG00000019716"; transcript_id "rmCircRNA-292"; exon_number "8" gene_name ""; gene_biotype "protein_coding"; oId "lv:circ-3078-002"; tissue "lv";
20	ncSplice	exon	29409703	29409843	.	+	.	gene_id "ENSMMUG00000019716"; transcript_id "rmCircRNA-292"; exon_number "9" gene_name ""; gene_biotype "protein_coding"; oId "lv:circ-3078-002"; tissue "lv";
20	ncSplice	exon	29409934	29410143	.	+	.	gene_id "ENSMMUG00000019716"; transcript_id "rmCircRNA-292"; exon_number "10" gene_name ""; gene_biotype "protein_coding"; oId "lv:circ-3078-002"; tissue "lv";
20	ncSplice	exon	29426864	29426994	.	+	.	gene_id "ENSMMUG00000019716"; transcript_id "rmCircRNA-292"; exon_number "11" gene_name ""; gene_biotype "protein_coding"; oId "lv:circ-3078-002"; tissue "lv";
20	ncSplice	exon	29427087	29427250	.	+	.	gene_id "ENSMMUG00000019716"; transcript_id "rmCircRNA-292"; exon_number "12" gene_name ""; gene_biotype "protein_coding"; oId "lv:circ-3078-002"; tissue "lv";
20	ncSplice	exon	29432497	29432651	.	+	.	gene_id "ENSMMUG00000019716"; transcript_id "rmCircRNA-292"; exon_number "13" gene_name ""; gene_biotype "protein_coding"; oId "lv:circ-3078-002"; tissue "lv";
20	ncSplice	exon	29432749	29432880	.	+	.	gene_id "ENSMMUG00000019716"; transcript_id "rmCircRNA-292"; exon_number "14" gene_name ""; gene_biotype "protein_coding"; oId "lv:circ-3078-002"; tissue "lv";
20	ncSplice	exon	29433057	29433130	.	+	.	gene_id "ENSMMUG00000019716"; transcript_id "rmCircRNA-292"; exon_number "15" gene_name ""; gene_biotype "protein_coding"; oId "lv:circ-3078-002"; tissue "lv";
20	ncSplice	exon	29433360	29438001	.	+	.	gene_id "ENSMMUG00000019716"; transcript_id "rmCircRNA-292"; exon_number "16" gene_name ""; gene_biotype "protein_coding"; oId "lv:circ-3078-002"; tissue "lv";
20	ncSplice	exon	29438491	29438962	.	+	.	gene_id "ENSMMUG00000019716"; transcript_id "rmCircRNA-292"; exon_number "17" gene_name ""; gene_biotype "protein_coding"; oId "lv:circ-3078-002"; tissue "lv";
20	ncSplice	exon	29439045	29439146	.	+	.	gene_id "ENSMMUG00000019716"; transcript_id "rmCircRNA-292"; exon_number "18" gene_name ""; gene_biotype "protein_coding"; oId "lv:circ-3078-002"; tissue "lv";
20	ncSplice	exon	29439706	29459329	.	+	.	gene_id "ENSMMUG00000019716"; transcript_id "rmCircRNA-292"; exon_number "19" gene_name ""; gene_biotype "protein_coding"; oId "lv:circ-3078-002"; tissue "lv";
20	ncSplice	gene	3945712	3948216	.	-	.	gene_id "ENSMMUG00000002286"; gene_name "CREBBP"; gene_source "ncSplice"; gene_biotype "protein_coding";
20	ncSplice	transcript	3945712	3948216	.	-	.	gene_id "ENSMMUG00000002286"; transcript_id "rmCircRNA-293"; gene_name "CREBBP"; gene_biotype "protein_coding"; transcript_biotype "circRNA"; oId "lv:circCREBBP-3091-001|ts:circCREBBP-5803-001"; tissue "lv|ts";
20	ncSplice	exon	3945712	3945888	.	-	.	gene_id "ENSMMUG00000002286"; transcript_id "rmCircRNA-293"; exon_number "1" gene_name "CREBBP"; gene_biotype "protein_coding"; oId "lv:circCREBBP-3091-001|ts:circCREBBP-5803-001"; tissue "lv|ts";
20	ncSplice	exon	3948083	3948216	.	-	.	gene_id "ENSMMUG00000002286"; transcript_id "rmCircRNA-293"; exon_number "2" gene_name "CREBBP"; gene_biotype "protein_coding"; oId "lv:circCREBBP-3091-001|ts:circCREBBP-5803-001"; tissue "lv|ts";
20	ncSplice	gene	4399156	4400081	.	-	.	gene_id "20:4399155:4400081:-1"; gene_name "20:4399155:4400081:-1"; gene_source "ncSplice"; gene_biotype "novel";
20	ncSplice	transcript	4399156	4400081	.	-	.	gene_id "20:4399155:4400081:-1"; transcript_id "rmCircRNA-294"; gene_name "20:4399155:4400081:-1"; gene_biotype "novel"; transcript_biotype "circRNA"; oId "lv:circ20:4399155:4400081:-1-3093-002|ce:circ20:4399155:4400081:-1-7053-002"; tissue "lv|ce";
20	ncSplice	exon	4399156	4399447	.	-	.	gene_id "20:4399155:4400081:-1"; transcript_id "rmCircRNA-294"; exon_number "1" gene_name "20:4399155:4400081:-1"; gene_biotype "novel"; oId "lv:circ20:4399155:4400081:-1-3093-002|ce:circ20:4399155:4400081:-1-7053-002"; tissue "lv|ce";
20	ncSplice	exon	4399704	4399802	.	-	.	gene_id "20:4399155:4400081:-1"; transcript_id "rmCircRNA-294"; exon_number "2" gene_name "20:4399155:4400081:-1"; gene_biotype "novel"; oId "lv:circ20:4399155:4400081:-1-3093-002|ce:circ20:4399155:4400081:-1-7053-002"; tissue "lv|ce";
20	ncSplice	exon	4399916	4400081	.	-	.	gene_id "20:4399155:4400081:-1"; transcript_id "rmCircRNA-294"; exon_number "3" gene_name "20:4399155:4400081:-1"; gene_biotype "novel"; oId "lv:circ20:4399155:4400081:-1-3093-002|ce:circ20:4399155:4400081:-1-7053-002"; tissue "lv|ce";
20	ncSplice	gene	45697009	45715127	.	+	.	gene_id "ENSMMUG00000004718"; gene_name "PHKB"; gene_source "ncSplice"; gene_biotype "protein_coding";
20	ncSplice	transcript	45697009	45715127	.	+	.	gene_id "ENSMMUG00000004718"; transcript_id "rmCircRNA-295"; gene_name "PHKB"; gene_biotype "protein_coding"; transcript_biotype "circRNA"; oId "lv:circPHKB-3096-001|ts:circPHKB-5818-004"; tissue "lv|ts";
20	ncSplice	exon	45697009	45697130	.	+	.	gene_id "ENSMMUG00000004718"; transcript_id "rmCircRNA-295"; exon_number "1" gene_name "PHKB"; gene_biotype "protein_coding"; oId "lv:circPHKB-3096-001|ts:circPHKB-5818-004"; tissue "lv|ts";
20	ncSplice	exon	45699221	45699359	.	+	.	gene_id "ENSMMUG00000004718"; transcript_id "rmCircRNA-295"; exon_number "2" gene_name "PHKB"; gene_biotype "protein_coding"; oId "lv:circPHKB-3096-001|ts:circPHKB-5818-004"; tissue "lv|ts";
20	ncSplice	exon	45702645	45702744	.	+	.	gene_id "ENSMMUG00000004718"; transcript_id "rmCircRNA-295"; exon_number "3" gene_name "PHKB"; gene_biotype "protein_coding"; oId "lv:circPHKB-3096-001|ts:circPHKB-5818-004"; tissue "lv|ts";
20	ncSplice	exon	45711272	45711379	.	+	.	gene_id "ENSMMUG00000004718"; transcript_id "rmCircRNA-295"; exon_number "4" gene_name "PHKB"; gene_biotype "protein_coding"; oId "lv:circPHKB-3096-001|ts:circPHKB-5818-004"; tissue "lv|ts";
20	ncSplice	exon	45715047	45715127	.	+	.	gene_id "ENSMMUG00000004718"; transcript_id "rmCircRNA-295"; exon_number "5" gene_name "PHKB"; gene_biotype "protein_coding"; oId "lv:circPHKB-3096-001|ts:circPHKB-5818-004"; tissue "lv|ts";
20	ncSplice	gene	45697009	45744767	.	+	.	gene_id "ENSMMUG00000004718"; gene_name "PHKB"; gene_source "ncSplice"; gene_biotype "protein_coding";
20	ncSplice	transcript	45697009	45744767	.	+	.	gene_id "ENSMMUG00000004718"; transcript_id "rmCircRNA-296"; gene_name "PHKB"; gene_biotype "protein_coding"; transcript_biotype "circRNA"; oId "lv:circPHKB-3097-002|ce:circPHKB-7067-012|ts:circPHKB-5819-004"; tissue "lv|ce|ts";
20	ncSplice	exon	45697009	45697130	.	+	.	gene_id "ENSMMUG00000004718"; transcript_id "rmCircRNA-296"; exon_number "1" gene_name "PHKB"; gene_biotype "protein_coding"; oId "lv:circPHKB-3097-002|ce:circPHKB-7067-012|ts:circPHKB-5819-004"; tissue "lv|ce|ts";
20	ncSplice	exon	45699221	45699359	.	+	.	gene_id "ENSMMUG00000004718"; transcript_id "rmCircRNA-296"; exon_number "2" gene_name "PHKB"; gene_biotype "protein_coding"; oId "lv:circPHKB-3097-002|ce:circPHKB-7067-012|ts:circPHKB-5819-004"; tissue "lv|ce|ts";
20	ncSplice	exon	45702645	45702744	.	+	.	gene_id "ENSMMUG00000004718"; transcript_id "rmCircRNA-296"; exon_number "3" gene_name "PHKB"; gene_biotype "protein_coding"; oId "lv:circPHKB-3097-002|ce:circPHKB-7067-012|ts:circPHKB-5819-004"; tissue "lv|ce|ts";
20	ncSplice	exon	45711272	45711379	.	+	.	gene_id "ENSMMUG00000004718"; transcript_id "rmCircRNA-296"; exon_number "4" gene_name "PHKB"; gene_biotype "protein_coding"; oId "lv:circPHKB-3097-002|ce:circPHKB-7067-012|ts:circPHKB-5819-004"; tissue "lv|ce|ts";
20	ncSplice	exon	45715047	45715127	.	+	.	gene_id "ENSMMUG00000004718"; transcript_id "rmCircRNA-296"; exon_number "5" gene_name "PHKB"; gene_biotype "protein_coding"; oId "lv:circPHKB-3097-002|ce:circPHKB-7067-012|ts:circPHKB-5819-004"; tissue "lv|ce|ts";
20	ncSplice	exon	45744652	45744767	.	+	.	gene_id "ENSMMUG00000004718"; transcript_id "rmCircRNA-296"; exon_number "6" gene_name "PHKB"; gene_biotype "protein_coding"; oId "lv:circPHKB-3097-002|ce:circPHKB-7067-012|ts:circPHKB-5819-004"; tissue "lv|ce|ts";
20	ncSplice	gene	46465199	46489563	.	+	.	gene_id "ENSMMUG00000007397"; gene_name "LONP2"; gene_source "ncSplice"; gene_biotype "protein_coding";
20	ncSplice	transcript	46465199	46489563	.	+	.	gene_id "ENSMMUG00000007397"; transcript_id "rmCircRNA-297"; gene_name "LONP2"; gene_biotype "protein_coding"; transcript_biotype "circRNA"; oId "lv:circLONP2-3107-003|ce:circLONP2-7085-001|ts:circLONP2-5828-001"; tissue "lv|ce|ts";
20	ncSplice	exon	46465199	46465340	.	+	.	gene_id "ENSMMUG00000007397"; transcript_id "rmCircRNA-297"; exon_number "1" gene_name "LONP2"; gene_biotype "protein_coding"; oId "lv:circLONP2-3107-003|ce:circLONP2-7085-001|ts:circLONP2-5828-001"; tissue "lv|ce|ts";
20	ncSplice	exon	46482417	46482567	.	+	.	gene_id "ENSMMUG00000007397"; transcript_id "rmCircRNA-297"; exon_number "2" gene_name "LONP2"; gene_biotype "protein_coding"; oId "lv:circLONP2-3107-003|ce:circLONP2-7085-001|ts:circLONP2-5828-001"; tissue "lv|ce|ts";
20	ncSplice	exon	46485939	46486065	.	+	.	gene_id "ENSMMUG00000007397"; transcript_id "rmCircRNA-297"; exon_number "3" gene_name "LONP2"; gene_biotype "protein_coding"; oId "lv:circLONP2-3107-003|ce:circLONP2-7085-001|ts:circLONP2-5828-001"; tissue "lv|ce|ts";
20	ncSplice	exon	46489430	46489563	.	+	.	gene_id "ENSMMUG00000007397"; transcript_id "rmCircRNA-297"; exon_number "4" gene_name "LONP2"; gene_biotype "protein_coding"; oId "lv:circLONP2-3107-003|ce:circLONP2-7085-001|ts:circLONP2-5828-001"; tissue "lv|ce|ts";
20	ncSplice	gene	46465199	46524511	.	+	.	gene_id "ENSMMUG00000007397"; gene_name "LONP2"; gene_source "ncSplice"; gene_biotype "protein_coding";
20	ncSplice	transcript	46465199	46524511	.	+	.	gene_id "ENSMMUG00000007397"; transcript_id "rmCircRNA-298"; gene_name "LONP2"; gene_biotype "protein_coding"; transcript_biotype "circRNA"; oId "lv:circLONP2-3108-003|ce:circLONP2-7086-004"; tissue "lv|ce";
20	ncSplice	exon	46465199	46465340	.	+	.	gene_id "ENSMMUG00000007397"; transcript_id "rmCircRNA-298"; exon_number "1" gene_name "LONP2"; gene_biotype "protein_coding"; oId "lv:circLONP2-3108-003|ce:circLONP2-7086-004"; tissue "lv|ce";
20	ncSplice	exon	46482417	46482567	.	+	.	gene_id "ENSMMUG00000007397"; transcript_id "rmCircRNA-298"; exon_number "2" gene_name "LONP2"; gene_biotype "protein_coding"; oId "lv:circLONP2-3108-003|ce:circLONP2-7086-004"; tissue "lv|ce";
20	ncSplice	exon	46485939	46486065	.	+	.	gene_id "ENSMMUG00000007397"; transcript_id "rmCircRNA-298"; exon_number "3" gene_name "LONP2"; gene_biotype "protein_coding"; oId "lv:circLONP2-3108-003|ce:circLONP2-7086-004"; tissue "lv|ce";
20	ncSplice	exon	46489430	46489563	.	+	.	gene_id "ENSMMUG00000007397"; transcript_id "rmCircRNA-298"; exon_number "4" gene_name "LONP2"; gene_biotype "protein_coding"; oId "lv:circLONP2-3108-003|ce:circLONP2-7086-004"; tissue "lv|ce";
20	ncSplice	exon	46524369	46524511	.	+	.	gene_id "ENSMMUG00000007397"; transcript_id "rmCircRNA-298"; exon_number "5" gene_name "LONP2"; gene_biotype "protein_coding"; oId "lv:circLONP2-3108-003|ce:circLONP2-7086-004"; tissue "lv|ce";
20	ncSplice	gene	56916188	56916746	.	-	.	gene_id "ENSMMUG00000014625"; gene_name "CNOT1"; gene_source "ncSplice"; gene_biotype "protein_coding";
20	ncSplice	transcript	56916188	56916746	.	-	.	gene_id "ENSMMUG00000014625"; transcript_id "rmCircRNA-299"; gene_name "CNOT1"; gene_biotype "protein_coding"; transcript_biotype "circRNA"; oId "lv:circCNOT1-3135-001|ce:circCNOT1-7157-001|ts:circCNOT1-5870-001"; tissue "lv|ce|ts";
20	ncSplice	exon	56916188	56916278	.	-	.	gene_id "ENSMMUG00000014625"; transcript_id "rmCircRNA-299"; exon_number "1" gene_name "CNOT1"; gene_biotype "protein_coding"; oId "lv:circCNOT1-3135-001|ce:circCNOT1-7157-001|ts:circCNOT1-5870-001"; tissue "lv|ce|ts";
20	ncSplice	exon	56916596	56916746	.	-	.	gene_id "ENSMMUG00000014625"; transcript_id "rmCircRNA-299"; exon_number "2" gene_name "CNOT1"; gene_biotype "protein_coding"; oId "lv:circCNOT1-3135-001|ce:circCNOT1-7157-001|ts:circCNOT1-5870-001"; tissue "lv|ce|ts";
20	ncSplice	gene	67172670	67177170	.	+	.	gene_id "ENSMMUG00000011850"; gene_name "CDH1"; gene_source "ncSplice"; gene_biotype "protein_coding";
20	ncSplice	transcript	67172670	67177170	.	+	.	gene_id "ENSMMUG00000011850"; transcript_id "rmCircRNA-300"; gene_name "CDH1"; gene_biotype "protein_coding"; transcript_biotype "circRNA"; oId "lv:circCDH1-3155-001"; tissue "lv";
20	ncSplice	exon	67172670	67172845	.	+	.	gene_id "ENSMMUG00000011850"; transcript_id "rmCircRNA-300"; exon_number "1" gene_name "CDH1"; gene_biotype "protein_coding"; oId "lv:circCDH1-3155-001"; tissue "lv";
20	ncSplice	exon	67173120	67173248	.	+	.	gene_id "ENSMMUG00000011850"; transcript_id "rmCircRNA-300"; exon_number "2" gene_name "CDH1"; gene_biotype "protein_coding"; oId "lv:circCDH1-3155-001"; tissue "lv";
20	ncSplice	exon	67174322	67174504	.	+	.	gene_id "ENSMMUG00000011850"; transcript_id "rmCircRNA-300"; exon_number "3" gene_name "CDH1"; gene_biotype "protein_coding"; oId "lv:circCDH1-3155-001"; tissue "lv";
20	ncSplice	exon	67176926	67177170	.	+	.	gene_id "ENSMMUG00000011850"; transcript_id "rmCircRNA-300"; exon_number "4" gene_name "CDH1"; gene_biotype "protein_coding"; oId "lv:circCDH1-3155-001"; tissue "lv";
20	ncSplice	gene	76275685	76330203	.	+	.	gene_id "ENSMMUG00000010610"; gene_name "WWOX"; gene_source "ncSplice"; gene_biotype "protein_coding";
20	ncSplice	transcript	76275685	76330203	.	+	.	gene_id "ENSMMUG00000010610"; transcript_id "rmCircRNA-301"; gene_name "WWOX"; gene_biotype "protein_coding"; transcript_biotype "circRNA"; oId "lv:circWWOX-3185-001|ce:circWWOX-7266-001"; tissue "lv|ce";
20	ncSplice	exon	76275685	76275749	.	+	.	gene_id "ENSMMUG00000010610"; transcript_id "rmCircRNA-301"; exon_number "1" gene_name "WWOX"; gene_biotype "protein_coding"; oId "lv:circWWOX-3185-001|ce:circWWOX-7266-001"; tissue "lv|ce";
20	ncSplice	exon	76277053	76277110	.	+	.	gene_id "ENSMMUG00000010610"; transcript_id "rmCircRNA-301"; exon_number "2" gene_name "WWOX"; gene_biotype "protein_coding"; oId "lv:circWWOX-3185-001|ce:circWWOX-7266-001"; tissue "lv|ce";
20	ncSplice	exon	76280598	76280776	.	+	.	gene_id "ENSMMUG00000010610"; transcript_id "rmCircRNA-301"; exon_number "3" gene_name "WWOX"; gene_biotype "protein_coding"; oId "lv:circWWOX-3185-001|ce:circWWOX-7266-001"; tissue "lv|ce";
[truncated: 17,038 more rows]
