# Supplementary material for: Circular RNA repertoires are associated with evolutionarily young transposable elements
Source: eLife. 2021 Sep 20;10:e67991. doi: 10.7554/eLife.67991 (PMC8516420; doi:10.7554/eLife.67991)
Supplement: Supplementary file 16. — A gtf-file with all circRNA transcripts including the transcript and exon coordinates. [file elife-67991-supp16.gtf]

10	ncSplice	gene	101667886	101676436	.	-	.	gene_id "ENSG00000107829"; gene_name "FBXW4"; gene_source "ncSplice"; gene_biotype "protein_coding";
10	ncSplice	transcript	101667886	101676436	.	-	.	gene_id "ENSG00000107829"; transcript_id "hsCircRNA-1"; gene_name "FBXW4"; gene_biotype "protein_coding"; transcript_biotype "circRNA"; oId "lv:circFBXW4-10-001|ce:circFBXW4-21-006|ts:circFBXW4-21-002"; tissue "lv|ce|ts";
10	ncSplice	exon	101667886	101667980	.	-	.	gene_id "ENSG00000107829"; transcript_id "hsCircRNA-1"; exon_number "1" gene_name "FBXW4"; gene_biotype "protein_coding"; oId "lv:circFBXW4-10-001|ce:circFBXW4-21-006|ts:circFBXW4-21-002"; tissue "lv|ce|ts";
10	ncSplice	exon	101672915	101673047	.	-	.	gene_id "ENSG00000107829"; transcript_id "hsCircRNA-1"; exon_number "2" gene_name "FBXW4"; gene_biotype "protein_coding"; oId "lv:circFBXW4-10-001|ce:circFBXW4-21-006|ts:circFBXW4-21-002"; tissue "lv|ce|ts";
10	ncSplice	exon	101673488	101673673	.	-	.	gene_id "ENSG00000107829"; transcript_id "hsCircRNA-1"; exon_number "3" gene_name "FBXW4"; gene_biotype "protein_coding"; oId "lv:circFBXW4-10-001|ce:circFBXW4-21-006|ts:circFBXW4-21-002"; tissue "lv|ce|ts";
10	ncSplice	exon	101676341	101676436	.	-	.	gene_id "ENSG00000107829"; transcript_id "hsCircRNA-1"; exon_number "4" gene_name "FBXW4"; gene_biotype "protein_coding"; oId "lv:circFBXW4-10-001|ce:circFBXW4-21-006|ts:circFBXW4-21-002"; tissue "lv|ce|ts";
10	ncSplice	gene	103622470	103661114	.	-	.	gene_id "ENSG00000107957"; gene_name "SH3PXD2A"; gene_source "ncSplice"; gene_biotype "protein_coding";
10	ncSplice	transcript	103622470	103661114	.	-	.	gene_id "ENSG00000107957"; transcript_id "hsCircRNA-2"; gene_name "SH3PXD2A"; gene_biotype "protein_coding"; transcript_biotype "circRNA"; oId "lv:circSH3PXD2A-17-001"; tissue "lv";
10	ncSplice	exon	103622470	103622553	.	-	.	gene_id "ENSG00000107957"; transcript_id "hsCircRNA-2"; exon_number "1" gene_name "SH3PXD2A"; gene_biotype "protein_coding"; oId "lv:circSH3PXD2A-17-001"; tissue "lv";
10	ncSplice	exon	103627089	103627202	.	-	.	gene_id "ENSG00000107957"; transcript_id "hsCircRNA-2"; exon_number "2" gene_name "SH3PXD2A"; gene_biotype "protein_coding"; oId "lv:circSH3PXD2A-17-001"; tissue "lv";
10	ncSplice	exon	103660983	103661114	.	-	.	gene_id "ENSG00000107957"; transcript_id "hsCircRNA-2"; exon_number "3" gene_name "SH3PXD2A"; gene_biotype "protein_coding"; oId "lv:circSH3PXD2A-17-001"; tissue "lv";
10	ncSplice	gene	115120185	115129535	.	+	.	gene_id "ENSG00000107518"; gene_name "ATRNL1"; gene_source "ncSplice"; gene_biotype "protein_coding";
10	ncSplice	transcript	115120185	115129535	.	+	.	gene_id "ENSG00000107518"; transcript_id "hsCircRNA-3"; gene_name "ATRNL1"; gene_biotype "protein_coding"; transcript_biotype "circRNA"; oId "lv:circATRNL1-34-001|ce:circATRNL1-109-004|ts:circATRNL1-91-004"; tissue "lv|ce|ts";
10	ncSplice	exon	115120185	115120268	.	+	.	gene_id "ENSG00000107518"; transcript_id "hsCircRNA-3"; exon_number "1" gene_name "ATRNL1"; gene_biotype "protein_coding"; oId "lv:circATRNL1-34-001|ce:circATRNL1-109-004|ts:circATRNL1-91-004"; tissue "lv|ce|ts";
10	ncSplice	exon	115121699	115121812	.	+	.	gene_id "ENSG00000107518"; transcript_id "hsCircRNA-3"; exon_number "2" gene_name "ATRNL1"; gene_biotype "protein_coding"; oId "lv:circATRNL1-34-001|ce:circATRNL1-109-004|ts:circATRNL1-91-004"; tissue "lv|ce|ts";
10	ncSplice	exon	115127593	115127721	.	+	.	gene_id "ENSG00000107518"; transcript_id "hsCircRNA-3"; exon_number "3" gene_name "ATRNL1"; gene_biotype "protein_coding"; oId "lv:circATRNL1-34-001|ce:circATRNL1-109-004|ts:circATRNL1-91-004"; tissue "lv|ce|ts";
10	ncSplice	exon	115129327	115129535	.	+	.	gene_id "ENSG00000107518"; transcript_id "hsCircRNA-3"; exon_number "4" gene_name "ATRNL1"; gene_biotype "protein_coding"; oId "lv:circATRNL1-34-001|ce:circATRNL1-109-004|ts:circATRNL1-91-004"; tissue "lv|ce|ts";
10	ncSplice	gene	116089741	116096764	.	-	.	gene_id "ENSG00000151892"; gene_name "GFRA1"; gene_source "ncSplice"; gene_biotype "protein_coding";
10	ncSplice	transcript	116089741	116096764	.	-	.	gene_id "ENSG00000151892"; transcript_id "hsCircRNA-4"; gene_name "GFRA1"; gene_biotype "protein_coding"; transcript_biotype "circRNA"; oId "lv:circGFRA1-37-001"; tissue "lv";
10	ncSplice	exon	116089741	116089922	.	-	.	gene_id "ENSG00000151892"; transcript_id "hsCircRNA-4"; exon_number "1" gene_name "GFRA1"; gene_biotype "protein_coding"; oId "lv:circGFRA1-37-001"; tissue "lv";
10	ncSplice	exon	116093702	116093836	.	-	.	gene_id "ENSG00000151892"; transcript_id "hsCircRNA-4"; exon_number "2" gene_name "GFRA1"; gene_biotype "protein_coding"; oId "lv:circGFRA1-37-001"; tissue "lv";
10	ncSplice	exon	116096655	116096764	.	-	.	gene_id "ENSG00000151892"; transcript_id "hsCircRNA-4"; exon_number "3" gene_name "GFRA1"; gene_biotype "protein_coding"; oId "lv:circGFRA1-37-001"; tissue "lv";
10	ncSplice	gene	11997672	12014184	.	-	.	gene_id "ENSG00000151461"; gene_name "UPF2"; gene_source "ncSplice"; gene_biotype "protein_coding";
10	ncSplice	transcript	11997672	12014184	.	-	.	gene_id "ENSG00000151461"; transcript_id "hsCircRNA-5"; gene_name "UPF2"; gene_biotype "protein_coding"; transcript_biotype "circRNA"; oId "lv:circUPF2-41-001|ce:circUPF2-157-001|ts:circUPF2-129-004"; tissue "lv|ce|ts";
10	ncSplice	exon	11997672	11997757	.	-	.	gene_id "ENSG00000151461"; transcript_id "hsCircRNA-5"; exon_number "1" gene_name "UPF2"; gene_biotype "protein_coding"; oId "lv:circUPF2-41-001|ce:circUPF2-157-001|ts:circUPF2-129-004"; tissue "lv|ce|ts";
10	ncSplice	exon	11999906	12000009	.	-	.	gene_id "ENSG00000151461"; transcript_id "hsCircRNA-5"; exon_number "2" gene_name "UPF2"; gene_biotype "protein_coding"; oId "lv:circUPF2-41-001|ce:circUPF2-157-001|ts:circUPF2-129-004"; tissue "lv|ce|ts";
10	ncSplice	exon	12001676	12001825	.	-	.	gene_id "ENSG00000151461"; transcript_id "hsCircRNA-5"; exon_number "3" gene_name "UPF2"; gene_biotype "protein_coding"; oId "lv:circUPF2-41-001|ce:circUPF2-157-001|ts:circUPF2-129-004"; tissue "lv|ce|ts";
10	ncSplice	exon	12004530	12004727	.	-	.	gene_id "ENSG00000151461"; transcript_id "hsCircRNA-5"; exon_number "4" gene_name "UPF2"; gene_biotype "protein_coding"; oId "lv:circUPF2-41-001|ce:circUPF2-157-001|ts:circUPF2-129-004"; tissue "lv|ce|ts";
10	ncSplice	exon	12014024	12014184	.	-	.	gene_id "ENSG00000151461"; transcript_id "hsCircRNA-5"; exon_number "5" gene_name "UPF2"; gene_biotype "protein_coding"; oId "lv:circUPF2-41-001|ce:circUPF2-157-001|ts:circUPF2-129-004"; tissue "lv|ce|ts";
10	ncSplice	gene	12081472	12084751	.	+	.	gene_id "ENSG00000181192"; gene_name "DHTKD1"; gene_source "ncSplice"; gene_biotype "protein_coding";
10	ncSplice	transcript	12081472	12084751	.	+	.	gene_id "ENSG00000181192"; transcript_id "hsCircRNA-6"; gene_name "DHTKD1"; gene_biotype "protein_coding"; transcript_biotype "circRNA"; oId "lv:circDHTKD1-42-001"; tissue "lv";
10	ncSplice	exon	12081472	12081627	.	+	.	gene_id "ENSG00000181192"; transcript_id "hsCircRNA-6"; exon_number "1" gene_name "DHTKD1"; gene_biotype "protein_coding"; oId "lv:circDHTKD1-42-001"; tissue "lv";
10	ncSplice	exon	12084540	12084751	.	+	.	gene_id "ENSG00000181192"; transcript_id "hsCircRNA-6"; exon_number "2" gene_name "DHTKD1"; gene_biotype "protein_coding"; oId "lv:circDHTKD1-42-001"; tissue "lv";
10	ncSplice	gene	12081472	12091684	.	+	.	gene_id "ENSG00000181192"; gene_name "DHTKD1"; gene_source "ncSplice"; gene_biotype "protein_coding";
10	ncSplice	transcript	12081472	12091684	.	+	.	gene_id "ENSG00000181192"; transcript_id "hsCircRNA-7"; gene_name "DHTKD1"; gene_biotype "protein_coding"; transcript_biotype "circRNA"; oId "lv:circDHTKD1-45-001|ce:circDHTKD1-165-001"; tissue "lv|ce";
10	ncSplice	exon	12081472	12081627	.	+	.	gene_id "ENSG00000181192"; transcript_id "hsCircRNA-7"; exon_number "1" gene_name "DHTKD1"; gene_biotype "protein_coding"; oId "lv:circDHTKD1-45-001|ce:circDHTKD1-165-001"; tissue "lv|ce";
10	ncSplice	exon	12084540	12084751	.	+	.	gene_id "ENSG00000181192"; transcript_id "hsCircRNA-7"; exon_number "2" gene_name "DHTKD1"; gene_biotype "protein_coding"; oId "lv:circDHTKD1-45-001|ce:circDHTKD1-165-001"; tissue "lv|ce";
10	ncSplice	exon	12087535	12087729	.	+	.	gene_id "ENSG00000181192"; transcript_id "hsCircRNA-7"; exon_number "3" gene_name "DHTKD1"; gene_biotype "protein_coding"; oId "lv:circDHTKD1-45-001|ce:circDHTKD1-165-001"; tissue "lv|ce";
10	ncSplice	exon	12088986	12089255	.	+	.	gene_id "ENSG00000181192"; transcript_id "hsCircRNA-7"; exon_number "4" gene_name "DHTKD1"; gene_biotype "protein_coding"; oId "lv:circDHTKD1-45-001|ce:circDHTKD1-165-001"; tissue "lv|ce";
10	ncSplice	exon	12091513	12091684	.	+	.	gene_id "ENSG00000181192"; transcript_id "hsCircRNA-7"; exon_number "5" gene_name "DHTKD1"; gene_biotype "protein_coding"; oId "lv:circDHTKD1-45-001|ce:circDHTKD1-165-001"; tissue "lv|ce";
10	ncSplice	gene	12081472	12094271	.	+	.	gene_id "ENSG00000181192"; gene_name "DHTKD1"; gene_source "ncSplice"; gene_biotype "protein_coding";
10	ncSplice	transcript	12081472	12094271	.	+	.	gene_id "ENSG00000181192"; transcript_id "hsCircRNA-8"; gene_name "DHTKD1"; gene_biotype "protein_coding"; transcript_biotype "circRNA"; oId "lv:circDHTKD1-46-001|ts:circDHTKD1-135-001"; tissue "lv|ts";
10	ncSplice	exon	12081472	12081627	.	+	.	gene_id "ENSG00000181192"; transcript_id "hsCircRNA-8"; exon_number "1" gene_name "DHTKD1"; gene_biotype "protein_coding"; oId "lv:circDHTKD1-46-001|ts:circDHTKD1-135-001"; tissue "lv|ts";
10	ncSplice	exon	12084540	12084751	.	+	.	gene_id "ENSG00000181192"; transcript_id "hsCircRNA-8"; exon_number "2" gene_name "DHTKD1"; gene_biotype "protein_coding"; oId "lv:circDHTKD1-46-001|ts:circDHTKD1-135-001"; tissue "lv|ts";
10	ncSplice	exon	12087535	12087729	.	+	.	gene_id "ENSG00000181192"; transcript_id "hsCircRNA-8"; exon_number "3" gene_name "DHTKD1"; gene_biotype "protein_coding"; oId "lv:circDHTKD1-46-001|ts:circDHTKD1-135-001"; tissue "lv|ts";
10	ncSplice	exon	12088986	12089255	.	+	.	gene_id "ENSG00000181192"; transcript_id "hsCircRNA-8"; exon_number "4" gene_name "DHTKD1"; gene_biotype "protein_coding"; oId "lv:circDHTKD1-46-001|ts:circDHTKD1-135-001"; tissue "lv|ts";
10	ncSplice	exon	12091513	12091684	.	+	.	gene_id "ENSG00000181192"; transcript_id "hsCircRNA-8"; exon_number "5" gene_name "DHTKD1"; gene_biotype "protein_coding"; oId "lv:circDHTKD1-46-001|ts:circDHTKD1-135-001"; tissue "lv|ts";
10	ncSplice	exon	12094073	12094271	.	+	.	gene_id "ENSG00000181192"; transcript_id "hsCircRNA-8"; exon_number "6" gene_name "DHTKD1"; gene_biotype "protein_coding"; oId "lv:circDHTKD1-46-001|ts:circDHTKD1-135-001"; tissue "lv|ts";
10	ncSplice	gene	12081472	12120267	.	+	.	gene_id "ENSG00000181192"; gene_name "DHTKD1"; gene_source "ncSplice"; gene_biotype "protein_coding";
10	ncSplice	transcript	12081472	12120267	.	+	.	gene_id "ENSG00000181192"; transcript_id "hsCircRNA-9"; gene_name "DHTKD1"; gene_biotype "protein_coding"; transcript_biotype "circRNA"; oId "lv:circDHTKD1-47-001|ce:circDHTKD1-170-009"; tissue "lv|ce";
10	ncSplice	exon	12081472	12081627	.	+	.	gene_id "ENSG00000181192"; transcript_id "hsCircRNA-9"; exon_number "1" gene_name "DHTKD1"; gene_biotype "protein_coding"; oId "lv:circDHTKD1-47-001|ce:circDHTKD1-170-009"; tissue "lv|ce";
10	ncSplice	exon	12084540	12084751	.	+	.	gene_id "ENSG00000181192"; transcript_id "hsCircRNA-9"; exon_number "2" gene_name "DHTKD1"; gene_biotype "protein_coding"; oId "lv:circDHTKD1-47-001|ce:circDHTKD1-170-009"; tissue "lv|ce";
10	ncSplice	exon	12087535	12087729	.	+	.	gene_id "ENSG00000181192"; transcript_id "hsCircRNA-9"; exon_number "3" gene_name "DHTKD1"; gene_biotype "protein_coding"; oId "lv:circDHTKD1-47-001|ce:circDHTKD1-170-009"; tissue "lv|ce";
10	ncSplice	exon	12088986	12089255	.	+	.	gene_id "ENSG00000181192"; transcript_id "hsCircRNA-9"; exon_number "4" gene_name "DHTKD1"; gene_biotype "protein_coding"; oId "lv:circDHTKD1-47-001|ce:circDHTKD1-170-009"; tissue "lv|ce";
10	ncSplice	exon	12091513	12091684	.	+	.	gene_id "ENSG00000181192"; transcript_id "hsCircRNA-9"; exon_number "5" gene_name "DHTKD1"; gene_biotype "protein_coding"; oId "lv:circDHTKD1-47-001|ce:circDHTKD1-170-009"; tissue "lv|ce";
10	ncSplice	exon	12094073	12094271	.	+	.	gene_id "ENSG00000181192"; transcript_id "hsCircRNA-9"; exon_number "6" gene_name "DHTKD1"; gene_biotype "protein_coding"; oId "lv:circDHTKD1-47-001|ce:circDHTKD1-170-009"; tissue "lv|ce";
10	ncSplice	exon	12097684	12097996	.	+	.	gene_id "ENSG00000181192"; transcript_id "hsCircRNA-9"; exon_number "7" gene_name "DHTKD1"; gene_biotype "protein_coding"; oId "lv:circDHTKD1-47-001|ce:circDHTKD1-170-009"; tissue "lv|ce";
10	ncSplice	exon	12100178	12100262	.	+	.	gene_id "ENSG00000181192"; transcript_id "hsCircRNA-9"; exon_number "8" gene_name "DHTKD1"; gene_biotype "protein_coding"; oId "lv:circDHTKD1-47-001|ce:circDHTKD1-170-009"; tissue "lv|ce";
10	ncSplice	exon	12101042	12101181	.	+	.	gene_id "ENSG00000181192"; transcript_id "hsCircRNA-9"; exon_number "9" gene_name "DHTKD1"; gene_biotype "protein_coding"; oId "lv:circDHTKD1-47-001|ce:circDHTKD1-170-009"; tissue "lv|ce";
10	ncSplice	exon	12106246	12106396	.	+	.	gene_id "ENSG00000181192"; transcript_id "hsCircRNA-9"; exon_number "10" gene_name "DHTKD1"; gene_biotype "protein_coding"; oId "lv:circDHTKD1-47-001|ce:circDHTKD1-170-009"; tissue "lv|ce";
10	ncSplice	exon	12107909	12108015	.	+	.	gene_id "ENSG00000181192"; transcript_id "hsCircRNA-9"; exon_number "11" gene_name "DHTKD1"; gene_biotype "protein_coding"; oId "lv:circDHTKD1-47-001|ce:circDHTKD1-170-009"; tissue "lv|ce";
10	ncSplice	exon	12112900	12113064	.	+	.	gene_id "ENSG00000181192"; transcript_id "hsCircRNA-9"; exon_number "12" gene_name "DHTKD1"; gene_biotype "protein_coding"; oId "lv:circDHTKD1-47-001|ce:circDHTKD1-170-009"; tissue "lv|ce";
10	ncSplice	exon	12117673	12117755	.	+	.	gene_id "ENSG00000181192"; transcript_id "hsCircRNA-9"; exon_number "13" gene_name "DHTKD1"; gene_biotype "protein_coding"; oId "lv:circDHTKD1-47-001|ce:circDHTKD1-170-009"; tissue "lv|ce";
10	ncSplice	exon	12118749	12118918	.	+	.	gene_id "ENSG00000181192"; transcript_id "hsCircRNA-9"; exon_number "14" gene_name "DHTKD1"; gene_biotype "protein_coding"; oId "lv:circDHTKD1-47-001|ce:circDHTKD1-170-009"; tissue "lv|ce";
10	ncSplice	exon	12120182	12120267	.	+	.	gene_id "ENSG00000181192"; transcript_id "hsCircRNA-9"; exon_number "15" gene_name "DHTKD1"; gene_biotype "protein_coding"; oId "lv:circDHTKD1-47-001|ce:circDHTKD1-170-009"; tissue "lv|ce";
10	ncSplice	gene	12118749	12120267	.	+	.	gene_id "ENSG00000181192"; gene_name "DHTKD1"; gene_source "ncSplice"; gene_biotype "protein_coding";
10	ncSplice	transcript	12118749	12120267	.	+	.	gene_id "ENSG00000181192"; transcript_id "hsCircRNA-10"; gene_name "DHTKD1"; gene_biotype "protein_coding"; transcript_biotype "circRNA"; oId "lv:circDHTKD1-54-001"; tissue "lv";
10	ncSplice	exon	12118749	12118918	.	+	.	gene_id "ENSG00000181192"; transcript_id "hsCircRNA-10"; exon_number "1" gene_name "DHTKD1"; gene_biotype "protein_coding"; oId "lv:circDHTKD1-54-001"; tissue "lv";
10	ncSplice	exon	12120182	12120267	.	+	.	gene_id "ENSG00000181192"; transcript_id "hsCircRNA-10"; exon_number "2" gene_name "DHTKD1"; gene_biotype "protein_coding"; oId "lv:circDHTKD1-54-001"; tissue "lv";
10	ncSplice	gene	121538592	121565704	.	-	.	gene_id "ENSG00000066468"; gene_name "FGFR2"; gene_source "ncSplice"; gene_biotype "protein_coding";
10	ncSplice	transcript	121538592	121565704	.	-	.	gene_id "ENSG00000066468"; transcript_id "hsCircRNA-11"; gene_name "FGFR2"; gene_biotype "protein_coding"; transcript_biotype "circRNA"; oId "lv:circFGFR2-55-001"; tissue "lv";
10	ncSplice	exon	121538592	121538715	.	-	.	gene_id "ENSG00000066468"; transcript_id "hsCircRNA-11"; exon_number "1" gene_name "FGFR2"; gene_biotype "protein_coding"; oId "lv:circFGFR2-55-001"; tissue "lv";
10	ncSplice	exon	121551290	121551459	.	-	.	gene_id "ENSG00000066468"; transcript_id "hsCircRNA-11"; exon_number "2" gene_name "FGFR2"; gene_biotype "protein_coding"; oId "lv:circFGFR2-55-001"; tissue "lv";
10	ncSplice	exon	121564502	121564579	.	-	.	gene_id "ENSG00000066468"; transcript_id "hsCircRNA-11"; exon_number "3" gene_name "FGFR2"; gene_biotype "protein_coding"; oId "lv:circFGFR2-55-001"; tissue "lv";
10	ncSplice	exon	121565438	121565704	.	-	.	gene_id "ENSG00000066468"; transcript_id "hsCircRNA-11"; exon_number "4" gene_name "FGFR2"; gene_biotype "protein_coding"; oId "lv:circFGFR2-55-001"; tissue "lv";
10	ncSplice	gene	124488422	124498128	.	+	.	gene_id "ENSG00000107902"; gene_name "LHPP"; gene_source "ncSplice"; gene_biotype "protein_coding";
10	ncSplice	transcript	124488422	124498128	.	+	.	gene_id "ENSG00000107902"; transcript_id "hsCircRNA-12"; gene_name "LHPP"; gene_biotype "protein_coding"; transcript_biotype "circRNA"; oId "lv:circLHPP-59-001"; tissue "lv";
10	ncSplice	exon	124488422	124488575	.	+	.	gene_id "ENSG00000107902"; transcript_id "hsCircRNA-12"; exon_number "1" gene_name "LHPP"; gene_biotype "protein_coding"; oId "lv:circLHPP-59-001"; tissue "lv";
10	ncSplice	exon	124496961	124497024	.	+	.	gene_id "ENSG00000107902"; transcript_id "hsCircRNA-12"; exon_number "2" gene_name "LHPP"; gene_biotype "protein_coding"; oId "lv:circLHPP-59-001"; tissue "lv";
10	ncSplice	exon	124498036	124498128	.	+	.	gene_id "ENSG00000107902"; transcript_id "hsCircRNA-12"; exon_number "3" gene_name "LHPP"; gene_biotype "protein_coding"; oId "lv:circLHPP-59-001"; tissue "lv";
10	ncSplice	gene	15816835	15847943	.	-	.	gene_id "ENSG00000148481"; gene_name "FAM188A"; gene_source "ncSplice"; gene_biotype "protein_coding";
10	ncSplice	transcript	15816835	15847943	.	-	.	gene_id "ENSG00000148481"; transcript_id "hsCircRNA-13"; gene_name "FAM188A"; gene_biotype "protein_coding"; transcript_biotype "circRNA"; oId "lv:circFAM188A-68-002|ts:circFAM188A-209-007"; tissue "lv|ts";
10	ncSplice	exon	15816835	15816915	.	-	.	gene_id "ENSG00000148481"; transcript_id "hsCircRNA-13"; exon_number "1" gene_name "FAM188A"; gene_biotype "protein_coding"; oId "lv:circFAM188A-68-002|ts:circFAM188A-209-007"; tissue "lv|ts";
10	ncSplice	exon	15821656	15821726	.	-	.	gene_id "ENSG00000148481"; transcript_id "hsCircRNA-13"; exon_number "2" gene_name "FAM188A"; gene_biotype "protein_coding"; oId "lv:circFAM188A-68-002|ts:circFAM188A-209-007"; tissue "lv|ts";
10	ncSplice	exon	15833630	15833709	.	-	.	gene_id "ENSG00000148481"; transcript_id "hsCircRNA-13"; exon_number "3" gene_name "FAM188A"; gene_biotype "protein_coding"; oId "lv:circFAM188A-68-002|ts:circFAM188A-209-007"; tissue "lv|ts";
10	ncSplice	exon	15834543	15834616	.	-	.	gene_id "ENSG00000148481"; transcript_id "hsCircRNA-13"; exon_number "4" gene_name "FAM188A"; gene_biotype "protein_coding"; oId "lv:circFAM188A-68-002|ts:circFAM188A-209-007"; tissue "lv|ts";
10	ncSplice	exon	15837204	15837318	.	-	.	gene_id "ENSG00000148481"; transcript_id "hsCircRNA-13"; exon_number "5" gene_name "FAM188A"; gene_biotype "protein_coding"; oId "lv:circFAM188A-68-002|ts:circFAM188A-209-007"; tissue "lv|ts";
10	ncSplice	exon	15838228	15838279	.	-	.	gene_id "ENSG00000148481"; transcript_id "hsCircRNA-13"; exon_number "6" gene_name "FAM188A"; gene_biotype "protein_coding"; oId "lv:circFAM188A-68-002|ts:circFAM188A-209-007"; tissue "lv|ts";
10	ncSplice	exon	15841426	15841599	.	-	.	gene_id "ENSG00000148481"; transcript_id "hsCircRNA-13"; exon_number "7" gene_name "FAM188A"; gene_biotype "protein_coding"; oId "lv:circFAM188A-68-002|ts:circFAM188A-209-007"; tissue "lv|ts";
10	ncSplice	exon	15843212	15843272	.	-	.	gene_id "ENSG00000148481"; transcript_id "hsCircRNA-13"; exon_number "8" gene_name "FAM188A"; gene_biotype "protein_coding"; oId "lv:circFAM188A-68-002|ts:circFAM188A-209-007"; tissue "lv|ts";
10	ncSplice	exon	15847864	15847943	.	-	.	gene_id "ENSG00000148481"; transcript_id "hsCircRNA-13"; exon_number "9" gene_name "FAM188A"; gene_biotype "protein_coding"; oId "lv:circFAM188A-68-002|ts:circFAM188A-209-007"; tissue "lv|ts";
10	ncSplice	gene	15833630	15847943	.	-	.	gene_id "ENSG00000148481"; gene_name "FAM188A"; gene_source "ncSplice"; gene_biotype "protein_coding";
10	ncSplice	transcript	15833630	15847943	.	-	.	gene_id "ENSG00000148481"; transcript_id "hsCircRNA-14"; gene_name "FAM188A"; gene_biotype "protein_coding"; transcript_biotype "circRNA"; oId "lv:circFAM188A-71-002|ce:circFAM188A-276-006|ts:circFAM188A-212-007"; tissue "lv|ce|ts";
10	ncSplice	exon	15833630	15833709	.	-	.	gene_id "ENSG00000148481"; transcript_id "hsCircRNA-14"; exon_number "1" gene_name "FAM188A"; gene_biotype "protein_coding"; oId "lv:circFAM188A-71-002|ce:circFAM188A-276-006|ts:circFAM188A-212-007"; tissue "lv|ce|ts";
10	ncSplice	exon	15834543	15834616	.	-	.	gene_id "ENSG00000148481"; transcript_id "hsCircRNA-14"; exon_number "2" gene_name "FAM188A"; gene_biotype "protein_coding"; oId "lv:circFAM188A-71-002|ce:circFAM188A-276-006|ts:circFAM188A-212-007"; tissue "lv|ce|ts";
10	ncSplice	exon	15837204	15837318	.	-	.	gene_id "ENSG00000148481"; transcript_id "hsCircRNA-14"; exon_number "3" gene_name "FAM188A"; gene_biotype "protein_coding"; oId "lv:circFAM188A-71-002|ce:circFAM188A-276-006|ts:circFAM188A-212-007"; tissue "lv|ce|ts";
10	ncSplice	exon	15838228	15838279	.	-	.	gene_id "ENSG00000148481"; transcript_id "hsCircRNA-14"; exon_number "4" gene_name "FAM188A"; gene_biotype "protein_coding"; oId "lv:circFAM188A-71-002|ce:circFAM188A-276-006|ts:circFAM188A-212-007"; tissue "lv|ce|ts";
10	ncSplice	exon	15841426	15841599	.	-	.	gene_id "ENSG00000148481"; transcript_id "hsCircRNA-14"; exon_number "5" gene_name "FAM188A"; gene_biotype "protein_coding"; oId "lv:circFAM188A-71-002|ce:circFAM188A-276-006|ts:circFAM188A-212-007"; tissue "lv|ce|ts";
10	ncSplice	exon	15843212	15843272	.	-	.	gene_id "ENSG00000148481"; transcript_id "hsCircRNA-14"; exon_number "6" gene_name "FAM188A"; gene_biotype "protein_coding"; oId "lv:circFAM188A-71-002|ce:circFAM188A-276-006|ts:circFAM188A-212-007"; tissue "lv|ce|ts";
10	ncSplice	exon	15847864	15847943	.	-	.	gene_id "ENSG00000148481"; transcript_id "hsCircRNA-14"; exon_number "7" gene_name "FAM188A"; gene_biotype "protein_coding"; oId "lv:circFAM188A-71-002|ce:circFAM188A-276-006|ts:circFAM188A-212-007"; tissue "lv|ce|ts";
10	ncSplice	gene	17704431	17705741	.	+	.	gene_id "ENSG00000136738"; gene_name "STAM"; gene_source "ncSplice"; gene_biotype "protein_coding";
10	ncSplice	transcript	17704431	17705741	.	+	.	gene_id "ENSG00000136738"; transcript_id "hsCircRNA-15"; gene_name "STAM"; gene_biotype "protein_coding"; transcript_biotype "circRNA"; oId "lv:circSTAM-72-001|ce:circSTAM-285-001|ts:circSTAM-216-001"; tissue "lv|ce|ts";
10	ncSplice	exon	17704431	17704518	.	+	.	gene_id "ENSG00000136738"; transcript_id "hsCircRNA-15"; exon_number "1" gene_name "STAM"; gene_biotype "protein_coding"; oId "lv:circSTAM-72-001|ce:circSTAM-285-001|ts:circSTAM-216-001"; tissue "lv|ce|ts";
10	ncSplice	exon	17704970	17705024	.	+	.	gene_id "ENSG00000136738"; transcript_id "hsCircRNA-15"; exon_number "2" gene_name "STAM"; gene_biotype "protein_coding"; oId "lv:circSTAM-72-001|ce:circSTAM-285-001|ts:circSTAM-216-001"; tissue "lv|ce|ts";
10	ncSplice	exon	17705588	17705741	.	+	.	gene_id "ENSG00000136738"; transcript_id "hsCircRNA-15"; exon_number "3" gene_name "STAM"; gene_biotype "protein_coding"; oId "lv:circSTAM-72-001|ce:circSTAM-285-001|ts:circSTAM-216-001"; tissue "lv|ce|ts";
10	ncSplice	gene	31908172	31910563	.	-	.	gene_id "ENSG00000165322"; gene_name "ARHGAP12"; gene_source "ncSplice"; gene_biotype "protein_coding";
10	ncSplice	transcript	31908172	31910563	.	-	.	gene_id "ENSG00000165322"; transcript_id "hsCircRNA-16"; gene_name "ARHGAP12"; gene_biotype "protein_coding"; transcript_biotype "circRNA"; oId "lv:circARHGAP12-96-001|ce:circARHGAP12-368-001|ts:circARHGAP12-331-001"; tissue "lv|ce|ts";
10	ncSplice	exon	31908172	31908926	.	-	.	gene_id "ENSG00000165322"; transcript_id "hsCircRNA-16"; exon_number "1" gene_name "ARHGAP12"; gene_biotype "protein_coding"; oId "lv:circARHGAP12-96-001|ce:circARHGAP12-368-001|ts:circARHGAP12-331-001"; tissue "lv|ce|ts";
10	ncSplice	exon	31910525	31910563	.	-	.	gene_id "ENSG00000165322"; transcript_id "hsCircRNA-16"; exon_number "2" gene_name "ARHGAP12"; gene_biotype "protein_coding"; oId "lv:circARHGAP12-96-001|ce:circARHGAP12-368-001|ts:circARHGAP12-331-001"; tissue "lv|ce|ts";
10	ncSplice	gene	34269657	34284245	.	-	.	gene_id "ENSG00000148498"; gene_name "PARD3"; gene_source "ncSplice"; gene_biotype "protein_coding";
10	ncSplice	transcript	34269657	34284245	.	-	.	gene_id "ENSG00000148498"; transcript_id "hsCircRNA-17"; gene_name "PARD3"; gene_biotype "protein_coding"; transcript_biotype "circRNA"; oId "lv:circPARD3-99-001|ce:circPARD3-383-001|ts:circPARD3-348-001"; tissue "lv|ce|ts";
10	ncSplice	exon	34269657	34269899	.	-	.	gene_id "ENSG00000148498"; transcript_id "hsCircRNA-17"; exon_number "1" gene_name "PARD3"; gene_biotype "protein_coding"; oId "lv:circPARD3-99-001|ce:circPARD3-383-001|ts:circPARD3-348-001"; tissue "lv|ce|ts";
10	ncSplice	exon	34284135	34284245	.	-	.	gene_id "ENSG00000148498"; transcript_id "hsCircRNA-17"; exon_number "2" gene_name "PARD3"; gene_biotype "protein_coding"; oId "lv:circPARD3-99-001|ce:circPARD3-383-001|ts:circPARD3-348-001"; tissue "lv|ce|ts";
10	ncSplice	gene	35516523	35530243	.	+	.	gene_id "ENSG00000108100"; gene_name "CCNY"; gene_source "ncSplice"; gene_biotype "protein_coding";
10	ncSplice	transcript	35516523	35530243	.	+	.	gene_id "ENSG00000108100"; transcript_id "hsCircRNA-18"; gene_name "CCNY"; gene_biotype "protein_coding"; transcript_biotype "circRNA"; oId "lv:circCCNY-102-001|ce:circCCNY-393-001"; tissue "lv|ce";
10	ncSplice	exon	35516523	35516623	.	+	.	gene_id "ENSG00000108100"; transcript_id "hsCircRNA-18"; exon_number "1" gene_name "CCNY"; gene_biotype "protein_coding"; oId "lv:circCCNY-102-001|ce:circCCNY-393-001"; tissue "lv|ce";
10	ncSplice	exon	35525964	35525999	.	+	.	gene_id "ENSG00000108100"; transcript_id "hsCircRNA-18"; exon_number "2" gene_name "CCNY"; gene_biotype "protein_coding"; oId "lv:circCCNY-102-001|ce:circCCNY-393-001"; tissue "lv|ce";
10	ncSplice	exon	35529973	35530030	.	+	.	gene_id "ENSG00000108100"; transcript_id "hsCircRNA-18"; exon_number "3" gene_name "CCNY"; gene_biotype "protein_coding"; oId "lv:circCCNY-102-001|ce:circCCNY-393-001"; tissue "lv|ce";
10	ncSplice	exon	35530124	35530243	.	+	.	gene_id "ENSG00000108100"; transcript_id "hsCircRNA-18"; exon_number "4" gene_name "CCNY"; gene_biotype "protein_coding"; oId "lv:circCCNY-102-001|ce:circCCNY-393-001"; tissue "lv|ce";
10	ncSplice	gene	45975454	45988847	.	+	.	gene_id "ENSG00000265354"; gene_name "TIMM23"; gene_source "ncSplice"; gene_biotype "protein_coding";
10	ncSplice	transcript	45975454	45988847	.	+	.	gene_id "ENSG00000265354"; transcript_id "hsCircRNA-19"; gene_name "TIMM23"; gene_biotype "protein_coding"; transcript_biotype "circRNA"; oId "lv:circTIMM23-106-001|ce:circTIMM23-423-002|ts:circTIMM23-411-002"; tissue "lv|ce|ts";
10	ncSplice	exon	45975454	45975512	.	+	.	gene_id "ENSG00000265354"; transcript_id "hsCircRNA-19"; exon_number "1" gene_name "TIMM23"; gene_biotype "protein_coding"; oId "lv:circTIMM23-106-001|ce:circTIMM23-423-002|ts:circTIMM23-411-002"; tissue "lv|ce|ts";
10	ncSplice	exon	45982523	45982616	.	+	.	gene_id "ENSG00000265354"; transcript_id "hsCircRNA-19"; exon_number "2" gene_name "TIMM23"; gene_biotype "protein_coding"; oId "lv:circTIMM23-106-001|ce:circTIMM23-423-002|ts:circTIMM23-411-002"; tissue "lv|ce|ts";
10	ncSplice	exon	45982846	45982930	.	+	.	gene_id "ENSG00000265354"; transcript_id "hsCircRNA-19"; exon_number "3" gene_name "TIMM23"; gene_biotype "protein_coding"; oId "lv:circTIMM23-106-001|ce:circTIMM23-423-002|ts:circTIMM23-411-002"; tissue "lv|ce|ts";
10	ncSplice	exon	45985383	45985441	.	+	.	gene_id "ENSG00000265354"; transcript_id "hsCircRNA-19"; exon_number "4" gene_name "TIMM23"; gene_biotype "protein_coding"; oId "lv:circTIMM23-106-001|ce:circTIMM23-423-002|ts:circTIMM23-411-002"; tissue "lv|ce|ts";
10	ncSplice	exon	45988737	45988847	.	+	.	gene_id "ENSG00000265354"; transcript_id "hsCircRNA-19"; exon_number "5" gene_name "TIMM23"; gene_biotype "protein_coding"; oId "lv:circTIMM23-106-001|ce:circTIMM23-423-002|ts:circTIMM23-411-002"; tissue "lv|ce|ts";
10	ncSplice	gene	45982523	45988847	.	+	.	gene_id "ENSG00000265354"; gene_name "TIMM23"; gene_source "ncSplice"; gene_biotype "protein_coding";
10	ncSplice	transcript	45982523	45988847	.	+	.	gene_id "ENSG00000265354"; transcript_id "hsCircRNA-20"; gene_name "TIMM23"; gene_biotype "protein_coding"; transcript_biotype "circRNA"; oId "lv:circTIMM23-107-001|ce:circTIMM23-424-002|ts:circTIMM23-412-002"; tissue "lv|ce|ts";
10	ncSplice	exon	45982523	45982616	.	+	.	gene_id "ENSG00000265354"; transcript_id "hsCircRNA-20"; exon_number "1" gene_name "TIMM23"; gene_biotype "protein_coding"; oId "lv:circTIMM23-107-001|ce:circTIMM23-424-002|ts:circTIMM23-412-002"; tissue "lv|ce|ts";
10	ncSplice	exon	45982846	45982930	.	+	.	gene_id "ENSG00000265354"; transcript_id "hsCircRNA-20"; exon_number "2" gene_name "TIMM23"; gene_biotype "protein_coding"; oId "lv:circTIMM23-107-001|ce:circTIMM23-424-002|ts:circTIMM23-412-002"; tissue "lv|ce|ts";
10	ncSplice	exon	45985383	45985441	.	+	.	gene_id "ENSG00000265354"; transcript_id "hsCircRNA-20"; exon_number "3" gene_name "TIMM23"; gene_biotype "protein_coding"; oId "lv:circTIMM23-107-001|ce:circTIMM23-424-002|ts:circTIMM23-412-002"; tissue "lv|ce|ts";
10	ncSplice	exon	45988737	45988847	.	+	.	gene_id "ENSG00000265354"; transcript_id "hsCircRNA-20"; exon_number "4" gene_name "TIMM23"; gene_biotype "protein_coding"; oId "lv:circTIMM23-107-001|ce:circTIMM23-424-002|ts:circTIMM23-412-002"; tissue "lv|ce|ts";
10	ncSplice	gene	46795806	46798168	.	+	.	gene_id "ENSG00000204177"; gene_name "BMS1P1"; gene_source "ncSplice"; gene_biotype "transcribed_unprocessed_pseudogene";
10	ncSplice	transcript	46795806	46798168	.	+	.	gene_id "ENSG00000204177"; transcript_id "hsCircRNA-21"; gene_name "BMS1P1"; gene_biotype "transcribed_unprocessed_pseudogene"; transcript_biotype "circRNA"; oId "lv:circBMS1P1-109-001|ce:circBMS1P1-426-003"; tissue "lv|ce";
10	ncSplice	exon	46795806	46795953	.	+	.	gene_id "ENSG00000204177"; transcript_id "hsCircRNA-21"; exon_number "1" gene_name "BMS1P1"; gene_biotype "transcribed_unprocessed_pseudogene"; oId "lv:circBMS1P1-109-001|ce:circBMS1P1-426-003"; tissue "lv|ce";
10	ncSplice	exon	46796672	46796793	.	+	.	gene_id "ENSG00000204177"; transcript_id "hsCircRNA-21"; exon_number "2" gene_name "BMS1P1"; gene_biotype "transcribed_unprocessed_pseudogene"; oId "lv:circBMS1P1-109-001|ce:circBMS1P1-426-003"; tissue "lv|ce";
10	ncSplice	exon	46798029	46798168	.	+	.	gene_id "ENSG00000204177"; transcript_id "hsCircRNA-21"; exon_number "3" gene_name "BMS1P1"; gene_biotype "transcribed_unprocessed_pseudogene"; oId "lv:circBMS1P1-109-001|ce:circBMS1P1-426-003"; tissue "lv|ce";
10	ncSplice	gene	47581212	47581578	.	-	.	gene_id "ENSG00000266217"; gene_name "CTSLP7"; gene_source "ncSplice"; gene_biotype "unprocessed_pseudogene";
10	ncSplice	transcript	47581212	47581578	.	-	.	gene_id "ENSG00000266217"; transcript_id "hsCircRNA-22"; gene_name "CTSLP7"; gene_biotype "unprocessed_pseudogene"; transcript_biotype "circRNA"; oId "lv:circCTSLP7-112-001"; tissue "lv";
10	ncSplice	exon	47581212	47581358	.	-	.	gene_id "ENSG00000266217"; transcript_id "hsCircRNA-22"; exon_number "1" gene_name "CTSLP7"; gene_biotype "unprocessed_pseudogene"; oId "lv:circCTSLP7-112-001"; tissue "lv";
10	ncSplice	exon	47581459	47581578	.	-	.	gene_id "ENSG00000266217"; transcript_id "hsCircRNA-22"; exon_number "2" gene_name "CTSLP7"; gene_biotype "unprocessed_pseudogene"; oId "lv:circCTSLP7-112-001"; tissue "lv";
10	ncSplice	gene	50433476	50519921	.	-	.	gene_id "ENSG00000198964"; gene_name "SGMS1"; gene_source "ncSplice"; gene_biotype "protein_coding";
10	ncSplice	transcript	50433476	50519921	.	-	.	gene_id "ENSG00000198964"; transcript_id "hsCircRNA-23"; gene_name "SGMS1"; gene_biotype "protein_coding"; transcript_biotype "circRNA"; oId "lv:circSGMS1-119-001"; tissue "lv";
10	ncSplice	exon	50433476	50433556	.	-	.	gene_id "ENSG00000198964"; transcript_id "hsCircRNA-23"; exon_number "1" gene_name "SGMS1"; gene_biotype "protein_coding"; oId "lv:circSGMS1-119-001"; tissue "lv";
10	ncSplice	exon	50460673	50460814	.	-	.	gene_id "ENSG00000198964"; transcript_id "hsCircRNA-23"; exon_number "2" gene_name "SGMS1"; gene_biotype "protein_coding"; oId "lv:circSGMS1-119-001"; tissue "lv";
10	ncSplice	exon	50466890	50466932	.	-	.	gene_id "ENSG00000198964"; transcript_id "hsCircRNA-23"; exon_number "3" gene_name "SGMS1"; gene_biotype "protein_coding"; oId "lv:circSGMS1-119-001"; tissue "lv";
10	ncSplice	exon	50519831	50519921	.	-	.	gene_id "ENSG00000198964"; transcript_id "hsCircRNA-23"; exon_number "4" gene_name "SGMS1"; gene_biotype "protein_coding"; oId "lv:circSGMS1-119-001"; tissue "lv";
10	ncSplice	gene	5785142	5800705	.	-	.	gene_id "ENSG00000057608"; gene_name "GDI2"; gene_source "ncSplice"; gene_biotype "protein_coding";
10	ncSplice	transcript	5785142	5800705	.	-	.	gene_id "ENSG00000057608"; transcript_id "hsCircRNA-24"; gene_name "GDI2"; gene_biotype "protein_coding"; transcript_biotype "circRNA"; oId "lv:circGDI2-123-002"; tissue "lv";
10	ncSplice	exon	5785142	5786050	.	-	.	gene_id "ENSG00000057608"; transcript_id "hsCircRNA-24"; exon_number "1" gene_name "GDI2"; gene_biotype "protein_coding"; oId "lv:circGDI2-123-002"; tissue "lv";
10	ncSplice	exon	5794885	5795019	.	-	.	gene_id "ENSG00000057608"; transcript_id "hsCircRNA-24"; exon_number "2" gene_name "GDI2"; gene_biotype "protein_coding"; oId "lv:circGDI2-123-002"; tissue "lv";
10	ncSplice	exon	5796763	5796862	.	-	.	gene_id "ENSG00000057608"; transcript_id "hsCircRNA-24"; exon_number "3" gene_name "GDI2"; gene_biotype "protein_coding"; oId "lv:circGDI2-123-002"; tissue "lv";
10	ncSplice	exon	5800598	5800705	.	-	.	gene_id "ENSG00000057608"; transcript_id "hsCircRNA-24"; exon_number "4" gene_name "GDI2"; gene_biotype "protein_coding"; oId "lv:circGDI2-123-002"; tissue "lv";
10	ncSplice	gene	5794885	5800705	.	-	.	gene_id "ENSG00000057608"; gene_name "GDI2"; gene_source "ncSplice"; gene_biotype "protein_coding";
10	ncSplice	transcript	5794885	5800705	.	-	.	gene_id "ENSG00000057608"; transcript_id "hsCircRNA-25"; gene_name "GDI2"; gene_biotype "protein_coding"; transcript_biotype "circRNA"; oId "lv:circGDI2-125-001|ce:circGDI2-467-001|ts:circGDI2-464-001"; tissue "lv|ce|ts";
10	ncSplice	exon	5794885	5795019	.	-	.	gene_id "ENSG00000057608"; transcript_id "hsCircRNA-25"; exon_number "1" gene_name "GDI2"; gene_biotype "protein_coding"; oId "lv:circGDI2-125-001|ce:circGDI2-467-001|ts:circGDI2-464-001"; tissue "lv|ce|ts";
10	ncSplice	exon	5796763	5796862	.	-	.	gene_id "ENSG00000057608"; transcript_id "hsCircRNA-25"; exon_number "2" gene_name "GDI2"; gene_biotype "protein_coding"; oId "lv:circGDI2-125-001|ce:circGDI2-467-001|ts:circGDI2-464-001"; tissue "lv|ce|ts";
10	ncSplice	exon	5800598	5800705	.	-	.	gene_id "ENSG00000057608"; transcript_id "hsCircRNA-25"; exon_number "3" gene_name "GDI2"; gene_biotype "protein_coding"; oId "lv:circGDI2-125-001|ce:circGDI2-467-001|ts:circGDI2-464-001"; tissue "lv|ce|ts";
10	ncSplice	gene	68737845	68742569	.	+	.	gene_id "ENSG00000060339"; gene_name "CCAR1"; gene_source "ncSplice"; gene_biotype "protein_coding";
10	ncSplice	transcript	68737845	68742569	.	+	.	gene_id "ENSG00000060339"; transcript_id "hsCircRNA-26"; gene_name "CCAR1"; gene_biotype "protein_coding"; transcript_biotype "circRNA"; oId "lv:circCCAR1-141-001|ce:circCCAR1-545-001"; tissue "lv|ce";
10	ncSplice	exon	68737845	68737889	.	+	.	gene_id "ENSG00000060339"; transcript_id "hsCircRNA-26"; exon_number "1" gene_name "CCAR1"; gene_biotype "protein_coding"; oId "lv:circCCAR1-141-001|ce:circCCAR1-545-001"; tissue "lv|ce";
10	ncSplice	exon	68740629	68740661	.	+	.	gene_id "ENSG00000060339"; transcript_id "hsCircRNA-26"; exon_number "2" gene_name "CCAR1"; gene_biotype "protein_coding"; oId "lv:circCCAR1-141-001|ce:circCCAR1-545-001"; tissue "lv|ce";
10	ncSplice	exon	68742376	68742569	.	+	.	gene_id "ENSG00000060339"; transcript_id "hsCircRNA-26"; exon_number "3" gene_name "CCAR1"; gene_biotype "protein_coding"; oId "lv:circCCAR1-141-001|ce:circCCAR1-545-001"; tissue "lv|ce";
10	ncSplice	gene	7276892	7285954	.	-	.	gene_id "ENSG00000198879"; gene_name "SFMBT2"; gene_source "ncSplice"; gene_biotype "protein_coding";
10	ncSplice	transcript	7276892	7285954	.	-	.	gene_id "ENSG00000198879"; transcript_id "hsCircRNA-27"; gene_name "SFMBT2"; gene_biotype "protein_coding"; transcript_biotype "circRNA"; oId "lv:circSFMBT2-153-001"; tissue "lv";
10	ncSplice	exon	7276892	7276989	.	-	.	gene_id "ENSG00000198879"; transcript_id "hsCircRNA-27"; exon_number "1" gene_name "SFMBT2"; gene_biotype "protein_coding"; oId "lv:circSFMBT2-153-001"; tissue "lv";
10	ncSplice	exon	7283904	7284150	.	-	.	gene_id "ENSG00000198879"; transcript_id "hsCircRNA-27"; exon_number "2" gene_name "SFMBT2"; gene_biotype "protein_coding"; oId "lv:circSFMBT2-153-001"; tissue "lv";
10	ncSplice	exon	7285866	7285954	.	-	.	gene_id "ENSG00000198879"; transcript_id "hsCircRNA-27"; exon_number "3" gene_name "SFMBT2"; gene_biotype "protein_coding"; oId "lv:circSFMBT2-153-001"; tissue "lv";
10	ncSplice	gene	74394141	74398579	.	+	.	gene_id "ENSG00000156110"; gene_name "ADK"; gene_source "ncSplice"; gene_biotype "protein_coding";
10	ncSplice	transcript	74394141	74398579	.	+	.	gene_id "ENSG00000156110"; transcript_id "hsCircRNA-28"; gene_name "ADK"; gene_biotype "protein_coding"; transcript_biotype "circRNA"; oId "lv:circADK-157-001"; tissue "lv";
10	ncSplice	exon	74394141	74394313	.	+	.	gene_id "ENSG00000156110"; transcript_id "hsCircRNA-28"; exon_number "1" gene_name "ADK"; gene_biotype "protein_coding"; oId "lv:circADK-157-001"; tissue "lv";
10	ncSplice	exon	74398471	74398579	.	+	.	gene_id "ENSG00000156110"; transcript_id "hsCircRNA-28"; exon_number "2" gene_name "ADK"; gene_biotype "protein_coding"; oId "lv:circADK-157-001"; tissue "lv";
10	ncSplice	gene	76036008	76058783	.	+	.	gene_id "ENSG00000148655"; gene_name "C10orf11"; gene_source "ncSplice"; gene_biotype "protein_coding";
10	ncSplice	transcript	76036008	76058783	.	+	.	gene_id "ENSG00000148655"; transcript_id "hsCircRNA-29"; gene_name "C10orf11"; gene_biotype "protein_coding"; transcript_biotype "circRNA"; oId "lv:circC10orf11-158-001"; tissue "lv";
10	ncSplice	exon	76036008	76036134	.	+	.	gene_id "ENSG00000148655"; transcript_id "hsCircRNA-29"; exon_number "1" gene_name "C10orf11"; gene_biotype "protein_coding"; oId "lv:circC10orf11-158-001"; tissue "lv";
10	ncSplice	exon	76047164	76047303	.	+	.	gene_id "ENSG00000148655"; transcript_id "hsCircRNA-29"; exon_number "2" gene_name "C10orf11"; gene_biotype "protein_coding"; oId "lv:circC10orf11-158-001"; tissue "lv";
10	ncSplice	exon	76058666	76058783	.	+	.	gene_id "ENSG00000148655"; transcript_id "hsCircRNA-29"; exon_number "3" gene_name "C10orf11"; gene_biotype "protein_coding"; oId "lv:circC10orf11-158-001"; tissue "lv";
10	ncSplice	gene	7797047	7802854	.	+	.	gene_id "ENSG00000165629"; gene_name "ATP5C1"; gene_source "ncSplice"; gene_biotype "protein_coding";
10	ncSplice	transcript	7797047	7802854	.	+	.	gene_id "ENSG00000165629"; transcript_id "hsCircRNA-30"; gene_name "ATP5C1"; gene_biotype "protein_coding"; transcript_biotype "circRNA"; oId "lv:circATP5C1-160-001|ce:circATP5C1-643-002|ts:circATP5C1-586-002"; tissue "lv|ce|ts";
10	ncSplice	exon	7797047	7797178	.	+	.	gene_id "ENSG00000165629"; transcript_id "hsCircRNA-30"; exon_number "1" gene_name "ATP5C1"; gene_biotype "protein_coding"; oId "lv:circATP5C1-160-001|ce:circATP5C1-643-002|ts:circATP5C1-586-002"; tissue "lv|ce|ts";
10	ncSplice	exon	7798990	7799194	.	+	.	gene_id "ENSG00000165629"; transcript_id "hsCircRNA-30"; exon_number "2" gene_name "ATP5C1"; gene_biotype "protein_coding"; oId "lv:circATP5C1-160-001|ce:circATP5C1-643-002|ts:circATP5C1-586-002"; tissue "lv|ce|ts";
10	ncSplice	exon	7799772	7799915	.	+	.	gene_id "ENSG00000165629"; transcript_id "hsCircRNA-30"; exon_number "3" gene_name "ATP5C1"; gene_biotype "protein_coding"; oId "lv:circATP5C1-160-001|ce:circATP5C1-643-002|ts:circATP5C1-586-002"; tissue "lv|ce|ts";
10	ncSplice	exon	7800027	7800091	.	+	.	gene_id "ENSG00000165629"; transcript_id "hsCircRNA-30"; exon_number "4" gene_name "ATP5C1"; gene_biotype "protein_coding"; oId "lv:circATP5C1-160-001|ce:circATP5C1-643-002|ts:circATP5C1-586-002"; tissue "lv|ce|ts";
10	ncSplice	exon	7802270	7802425	.	+	.	gene_id "ENSG00000165629"; transcript_id "hsCircRNA-30"; exon_number "5" gene_name "ATP5C1"; gene_biotype "protein_coding"; oId "lv:circATP5C1-160-001|ce:circATP5C1-643-002|ts:circATP5C1-586-002"; tissue "lv|ce|ts";
10	ncSplice	exon	7802758	7802854	.	+	.	gene_id "ENSG00000165629"; transcript_id "hsCircRNA-30"; exon_number "6" gene_name "ATP5C1"; gene_biotype "protein_coding"; oId "lv:circATP5C1-160-001|ce:circATP5C1-643-002|ts:circATP5C1-586-002"; tissue "lv|ce|ts";
10	ncSplice	gene	84417771	84425893	.	+	.	gene_id "ENSG00000107771"; gene_name "CCSER2"; gene_source "ncSplice"; gene_biotype "protein_coding";
10	ncSplice	transcript	84417771	84425893	.	+	.	gene_id "ENSG00000107771"; transcript_id "hsCircRNA-31"; gene_name "CCSER2"; gene_biotype "protein_coding"; transcript_biotype "circRNA"; oId "lv:circCCSER2-163-001"; tissue "lv";
10	ncSplice	exon	84417771	84425048	.	+	.	gene_id "ENSG00000107771"; transcript_id "hsCircRNA-31"; exon_number "1" gene_name "CCSER2"; gene_biotype "protein_coding"; oId "lv:circCCSER2-163-001"; tissue "lv";
10	ncSplice	exon	84425731	84425893	.	+	.	gene_id "ENSG00000107771"; transcript_id "hsCircRNA-31"; exon_number "2" gene_name "CCSER2"; gene_biotype "protein_coding"; oId "lv:circCCSER2-163-001"; tissue "lv";
10	ncSplice	gene	92081320	92091944	.	-	.	gene_id "ENSG00000107864"; gene_name "CPEB3"; gene_source "ncSplice"; gene_biotype "protein_coding";
10	ncSplice	transcript	92081320	92091944	.	-	.	gene_id "ENSG00000107864"; transcript_id "hsCircRNA-32"; gene_name "CPEB3"; gene_biotype "protein_coding"; transcript_biotype "circRNA"; oId "lv:circCPEB3-169-001"; tissue "lv";
10	ncSplice	exon	92081320	92081501	.	-	.	gene_id "ENSG00000107864"; transcript_id "hsCircRNA-32"; exon_number "1" gene_name "CPEB3"; gene_biotype "protein_coding"; oId "lv:circCPEB3-169-001"; tissue "lv";
10	ncSplice	exon	92091830	92091944	.	-	.	gene_id "ENSG00000107864"; transcript_id "hsCircRNA-32"; exon_number "2" gene_name "CPEB3"; gene_biotype "protein_coding"; oId "lv:circCPEB3-169-001"; tissue "lv";
10	ncSplice	gene	94733297	94775539	.	+	.	gene_id "ENSG00000108242"; gene_name "CYP2C18"; gene_source "ncSplice"; gene_biotype "protein_coding";
10	ncSplice	transcript	94733297	94775539	.	+	.	gene_id "ENSG00000108242"; transcript_id "hsCircRNA-33"; gene_name "CYP2C18"; gene_biotype "protein_coding"; transcript_biotype "circRNA"; oId "lv:circCYP2C18-175-001"; tissue "lv";
10	ncSplice	exon	94733297	94733438	.	+	.	gene_id "ENSG00000108242"; transcript_id "hsCircRNA-33"; exon_number "1" gene_name "CYP2C18"; gene_biotype "protein_coding"; oId "lv:circCYP2C18-175-001"; tissue "lv";
10	ncSplice	exon	94775058	94775220	.	+	.	gene_id "ENSG00000108242"; transcript_id "hsCircRNA-33"; exon_number "2" gene_name "CYP2C18"; gene_biotype "protein_coding"; oId "lv:circCYP2C18-175-001"; tissue "lv";
10	ncSplice	exon	94775390	94775539	.	+	.	gene_id "ENSG00000108242"; transcript_id "hsCircRNA-33"; exon_number "3" gene_name "CYP2C18"; gene_biotype "protein_coding"; oId "lv:circCYP2C18-175-001"; tissue "lv";
10	ncSplice	gene	94733297	94781997	.	+	.	gene_id "ENSG00000108242"; gene_name "CYP2C18"; gene_source "ncSplice"; gene_biotype "protein_coding";
10	ncSplice	transcript	94733297	94781997	.	+	.	gene_id "ENSG00000108242"; transcript_id "hsCircRNA-34"; gene_name "CYP2C18"; gene_biotype "protein_coding"; transcript_biotype "circRNA"; oId "lv:circCYP2C18-176-001"; tissue "lv";
10	ncSplice	exon	94733297	94733438	.	+	.	gene_id "ENSG00000108242"; transcript_id "hsCircRNA-34"; exon_number "1" gene_name "CYP2C18"; gene_biotype "protein_coding"; oId "lv:circCYP2C18-176-001"; tissue "lv";
10	ncSplice	exon	94775058	94775220	.	+	.	gene_id "ENSG00000108242"; transcript_id "hsCircRNA-34"; exon_number "2" gene_name "CYP2C18"; gene_biotype "protein_coding"; oId "lv:circCYP2C18-176-001"; tissue "lv";
10	ncSplice	exon	94775390	94775539	.	+	.	gene_id "ENSG00000108242"; transcript_id "hsCircRNA-34"; exon_number "3" gene_name "CYP2C18"; gene_biotype "protein_coding"; oId "lv:circCYP2C18-176-001"; tissue "lv";
10	ncSplice	exon	94780499	94780659	.	+	.	gene_id "ENSG00000108242"; transcript_id "hsCircRNA-34"; exon_number "4" gene_name "CYP2C18"; gene_biotype "protein_coding"; oId "lv:circCYP2C18-176-001"; tissue "lv";
10	ncSplice	exon	94781821	94781997	.	+	.	gene_id "ENSG00000108242"; transcript_id "hsCircRNA-34"; exon_number "5" gene_name "CYP2C18"; gene_biotype "protein_coding"; oId "lv:circCYP2C18-176-001"; tissue "lv";
10	ncSplice	gene	94775058	94850058	.	+	.	gene_id "ENSG00000165841"; gene_name "CYP2C19"; gene_source "ncSplice"; gene_biotype "protein_coding";
10	ncSplice	transcript	94775058	94850058	.	+	.	gene_id "ENSG00000165841"; transcript_id "hsCircRNA-35"; gene_name "CYP2C19"; gene_biotype "protein_coding"; transcript_biotype "circRNA"; oId "lv:circCYP2C19-178-001"; tissue "lv";
10	ncSplice	exon	94775058	94775220	.	+	.	gene_id "ENSG00000165841"; transcript_id "hsCircRNA-35"; exon_number "1" gene_name "CYP2C19"; gene_biotype "protein_coding"; oId "lv:circCYP2C19-178-001"; tissue "lv";
10	ncSplice	exon	94775390	94775539	.	+	.	gene_id "ENSG00000165841"; transcript_id "hsCircRNA-35"; exon_number "2" gene_name "CYP2C19"; gene_biotype "protein_coding"; oId "lv:circCYP2C19-178-001"; tissue "lv";
10	ncSplice	exon	94780499	94780659	.	+	.	gene_id "ENSG00000165841"; transcript_id "hsCircRNA-35"; exon_number "3" gene_name "CYP2C19"; gene_biotype "protein_coding"; oId "lv:circCYP2C19-178-001"; tissue "lv";
10	ncSplice	exon	94781821	94781997	.	+	.	gene_id "ENSG00000165841"; transcript_id "hsCircRNA-35"; exon_number "4" gene_name "CYP2C19"; gene_biotype "protein_coding"; oId "lv:circCYP2C19-178-001"; tissue "lv";
10	ncSplice	exon	94820496	94820637	.	+	.	gene_id "ENSG00000165841"; transcript_id "hsCircRNA-35"; exon_number "5" gene_name "CYP2C19"; gene_biotype "protein_coding"; oId "lv:circCYP2C19-178-001"; tissue "lv";
10	ncSplice	exon	94842837	94843024	.	+	.	gene_id "ENSG00000165841"; transcript_id "hsCircRNA-35"; exon_number "6" gene_name "CYP2C19"; gene_biotype "protein_coding"; oId "lv:circCYP2C19-178-001"; tissue "lv";
10	ncSplice	exon	94849917	94850058	.	+	.	gene_id "ENSG00000165841"; transcript_id "hsCircRNA-35"; exon_number "7" gene_name "CYP2C19"; gene_biotype "protein_coding"; oId "lv:circCYP2C19-178-001"; tissue "lv";
10	ncSplice	gene	94780499	94781997	.	+	.	gene_id "ENSG00000165841"; gene_name "CYP2C19"; gene_source "ncSplice"; gene_biotype "protein_coding";
10	ncSplice	transcript	94780499	94781997	.	+	.	gene_id "ENSG00000165841"; transcript_id "hsCircRNA-36"; gene_name "CYP2C19"; gene_biotype "protein_coding"; transcript_biotype "circRNA"; oId "lv:circCYP2C19-179-001"; tissue "lv";
10	ncSplice	exon	94780499	94780659	.	+	.	gene_id "ENSG00000165841"; transcript_id "hsCircRNA-36"; exon_number "1" gene_name "CYP2C19"; gene_biotype "protein_coding"; oId "lv:circCYP2C19-179-001"; tissue "lv";
10	ncSplice	exon	94781821	94781997	.	+	.	gene_id "ENSG00000165841"; transcript_id "hsCircRNA-36"; exon_number "2" gene_name "CYP2C19"; gene_biotype "protein_coding"; oId "lv:circCYP2C19-179-001"; tissue "lv";
10	ncSplice	gene	94780570	94781997	.	+	.	gene_id "ENSG00000165841"; gene_name "CYP2C19"; gene_source "ncSplice"; gene_biotype "protein_coding";
10	ncSplice	transcript	94780570	94781997	.	+	.	gene_id "ENSG00000165841"; transcript_id "hsCircRNA-37"; gene_name "CYP2C19"; gene_biotype "protein_coding"; transcript_biotype "circRNA"; oId "lv:circCYP2C19-181-001"; tissue "lv";
10	ncSplice	exon	94780570	94780659	.	+	.	gene_id "ENSG00000165841"; transcript_id "hsCircRNA-37"; exon_number "1" gene_name "CYP2C19"; gene_biotype "protein_coding"; oId "lv:circCYP2C19-181-001"; tissue "lv";
10	ncSplice	exon	94781821	94781997	.	+	.	gene_id "ENSG00000165841"; transcript_id "hsCircRNA-37"; exon_number "2" gene_name "CYP2C19"; gene_biotype "protein_coding"; oId "lv:circCYP2C19-181-001"; tissue "lv";
10	ncSplice	gene	95058335	95067691	.	-	.	gene_id "ENSG00000138115"; gene_name "CYP2C8"; gene_source "ncSplice"; gene_biotype "protein_coding";
10	ncSplice	transcript	95058335	95067691	.	-	.	gene_id "ENSG00000138115"; transcript_id "hsCircRNA-38"; gene_name "CYP2C8"; gene_biotype "protein_coding"; transcript_biotype "circRNA"; oId "lv:circCYP2C8-183-001"; tissue "lv";
10	ncSplice	exon	95058335	95058511	.	-	.	gene_id "ENSG00000138115"; transcript_id "hsCircRNA-38"; exon_number "1" gene_name "CYP2C8"; gene_biotype "protein_coding"; oId "lv:circCYP2C8-183-001"; tissue "lv";
10	ncSplice	exon	95064800	95067357	.	-	.	gene_id "ENSG00000138115"; transcript_id "hsCircRNA-38"; exon_number "2" gene_name "CYP2C8"; gene_biotype "protein_coding"; oId "lv:circCYP2C8-183-001"; tissue "lv";
10	ncSplice	exon	95067529	95067691	.	-	.	gene_id "ENSG00000138115"; transcript_id "hsCircRNA-38"; exon_number "3" gene_name "CYP2C8"; gene_biotype "protein_coding"; oId "lv:circCYP2C8-183-001"; tissue "lv";
10	ncSplice	gene	95381685	95410777	.	-	.	gene_id "ENSG00000095637"; gene_name "SORBS1"; gene_source "ncSplice"; gene_biotype "protein_coding";
10	ncSplice	transcript	95381685	95410777	.	-	.	gene_id "ENSG00000095637"; transcript_id "hsCircRNA-39"; gene_name "SORBS1"; gene_biotype "protein_coding"; transcript_biotype "circRNA"; oId "lv:circSORBS1-185-001"; tissue "lv";
10	ncSplice	exon	95381685	95381799	.	-	.	gene_id "ENSG00000095637"; transcript_id "hsCircRNA-39"; exon_number "1" gene_name "SORBS1"; gene_biotype "protein_coding"; oId "lv:circSORBS1-185-001"; tissue "lv";
10	ncSplice	exon	95383985	95384114	.	-	.	gene_id "ENSG00000095637"; transcript_id "hsCircRNA-39"; exon_number "2" gene_name "SORBS1"; gene_biotype "protein_coding"; oId "lv:circSORBS1-185-001"; tissue "lv";
10	ncSplice	exon	95384238	95384285	.	-	.	gene_id "ENSG00000095637"; transcript_id "hsCircRNA-39"; exon_number "3" gene_name "SORBS1"; gene_biotype "protein_coding"; oId "lv:circSORBS1-185-001"; tissue "lv";
10	ncSplice	exon	95397220	95397283	.	-	.	gene_id "ENSG00000095637"; transcript_id "hsCircRNA-39"; exon_number "4" gene_name "SORBS1"; gene_biotype "protein_coding"; oId "lv:circSORBS1-185-001"; tissue "lv";
10	ncSplice	exon	95399017	95399189	.	-	.	gene_id "ENSG00000095637"; transcript_id "hsCircRNA-39"; exon_number "5" gene_name "SORBS1"; gene_biotype "protein_coding"; oId "lv:circSORBS1-185-001"; tissue "lv";
10	ncSplice	exon	95406118	95406147	.	-	.	gene_id "ENSG00000095637"; transcript_id "hsCircRNA-39"; exon_number "6" gene_name "SORBS1"; gene_biotype "protein_coding"; oId "lv:circSORBS1-185-001"; tissue "lv";
10	ncSplice	exon	95410633	95410777	.	-	.	gene_id "ENSG00000095637"; transcript_id "hsCircRNA-39"; exon_number "7" gene_name "SORBS1"; gene_biotype "protein_coding"; oId "lv:circSORBS1-185-001"; tissue "lv";
10	ncSplice	gene	96858292	96907747	.	+	.	gene_id "ENSG00000196233"; gene_name "LCOR"; gene_source "ncSplice"; gene_biotype "protein_coding";
10	ncSplice	transcript	96858292	96907747	.	+	.	gene_id "ENSG00000196233"; transcript_id "hsCircRNA-40"; gene_name "LCOR"; gene_biotype "protein_coding"; transcript_biotype "circRNA"; oId "lv:circLCOR-188-001"; tissue "lv";
10	ncSplice	exon	96858292	96907330	.	+	.	gene_id "ENSG00000196233"; transcript_id "hsCircRNA-40"; exon_number "1" gene_name "LCOR"; gene_biotype "protein_coding"; oId "lv:circLCOR-188-001"; tissue "lv";
10	ncSplice	exon	96907668	96907747	.	+	.	gene_id "ENSG00000196233"; transcript_id "hsCircRNA-40"; exon_number "2" gene_name "LCOR"; gene_biotype "protein_coding"; oId "lv:circLCOR-188-001"; tissue "lv";
10	ncSplice	gene	97436417	97437750	.	-	.	gene_id "ENSG00000171311"; gene_name "EXOSC1"; gene_source "ncSplice"; gene_biotype "protein_coding";
10	ncSplice	transcript	97436417	97437750	.	-	.	gene_id "ENSG00000171311"; transcript_id "hsCircRNA-41"; gene_name "EXOSC1"; gene_biotype "protein_coding"; transcript_biotype "circRNA"; oId "lv:circEXOSC1-189-001|ce:circEXOSC1-757-001|ts:circEXOSC1-670-001"; tissue "lv|ce|ts";
10	ncSplice	exon	97436417	97436551	.	-	.	gene_id "ENSG00000171311"; transcript_id "hsCircRNA-41"; exon_number "1" gene_name "EXOSC1"; gene_biotype "protein_coding"; oId "lv:circEXOSC1-189-001|ce:circEXOSC1-757-001|ts:circEXOSC1-670-001"; tissue "lv|ce|ts";
10	ncSplice	exon	97437191	97437275	.	-	.	gene_id "ENSG00000171311"; transcript_id "hsCircRNA-41"; exon_number "2" gene_name "EXOSC1"; gene_biotype "protein_coding"; oId "lv:circEXOSC1-189-001|ce:circEXOSC1-757-001|ts:circEXOSC1-670-001"; tissue "lv|ce|ts";
10	ncSplice	exon	97437700	97437750	.	-	.	gene_id "ENSG00000171311"; transcript_id "hsCircRNA-41"; exon_number "3" gene_name "EXOSC1"; gene_biotype "protein_coding"; oId "lv:circEXOSC1-189-001|ce:circEXOSC1-757-001|ts:circEXOSC1-670-001"; tissue "lv|ce|ts";
1	ncSplice	gene	11030176	11030882	.	-	.	gene_id "ENSG00000009724"; gene_name "MASP2"; gene_source "ncSplice"; gene_biotype "protein_coding";
1	ncSplice	transcript	11030176	11030882	.	-	.	gene_id "ENSG00000009724"; transcript_id "hsCircRNA-42"; gene_name "MASP2"; gene_biotype "protein_coding"; transcript_biotype "circRNA"; oId "lv:circMASP2-202-001"; tissue "lv";
1	ncSplice	exon	11030176	11030250	.	-	.	gene_id "ENSG00000009724"; transcript_id "hsCircRNA-42"; exon_number "1" gene_name "MASP2"; gene_biotype "protein_coding"; oId "lv:circMASP2-202-001"; tissue "lv";
1	ncSplice	exon	11030748	11030882	.	-	.	gene_id "ENSG00000009724"; transcript_id "hsCircRNA-42"; exon_number "2" gene_name "MASP2"; gene_biotype "protein_coding"; oId "lv:circMASP2-202-001"; tissue "lv";
11	ncSplice	gene	107390074	107392895	.	-	.	gene_id "ENSG00000152404"; gene_name "CWF19L2"; gene_source "ncSplice"; gene_biotype "protein_coding";
11	ncSplice	transcript	107390074	107392895	.	-	.	gene_id "ENSG00000152404"; transcript_id "hsCircRNA-43"; gene_name "CWF19L2"; gene_biotype "protein_coding"; transcript_biotype "circRNA"; oId "lv:circCWF19L2-204-001"; tissue "lv";
11	ncSplice	exon	107390074	107390211	.	-	.	gene_id "ENSG00000152404"; transcript_id "hsCircRNA-43"; exon_number "1" gene_name "CWF19L2"; gene_biotype "protein_coding"; oId "lv:circCWF19L2-204-001"; tissue "lv";
11	ncSplice	exon	107392779	107392895	.	-	.	gene_id "ENSG00000152404"; transcript_id "hsCircRNA-43"; exon_number "2" gene_name "CWF19L2"; gene_biotype "protein_coding"; oId "lv:circCWF19L2-204-001"; tissue "lv";
11	ncSplice	gene	107390074	107418287	.	-	.	gene_id "ENSG00000152404"; gene_name "CWF19L2"; gene_source "ncSplice"; gene_biotype "protein_coding";
11	ncSplice	transcript	107390074	107418287	.	-	.	gene_id "ENSG00000152404"; transcript_id "hsCircRNA-44"; gene_name "CWF19L2"; gene_biotype "protein_coding"; transcript_biotype "circRNA"; oId "lv:circCWF19L2-205-001|ce:circCWF19L2-874-001|ts:circCWF19L2-773-002"; tissue "lv|ce|ts";
11	ncSplice	exon	107390074	107390211	.	-	.	gene_id "ENSG00000152404"; transcript_id "hsCircRNA-44"; exon_number "1" gene_name "CWF19L2"; gene_biotype "protein_coding"; oId "lv:circCWF19L2-205-001|ce:circCWF19L2-874-001|ts:circCWF19L2-773-002"; tissue "lv|ce|ts";
11	ncSplice	exon	107392779	107392895	.	-	.	gene_id "ENSG00000152404"; transcript_id "hsCircRNA-44"; exon_number "2" gene_name "CWF19L2"; gene_biotype "protein_coding"; oId "lv:circCWF19L2-205-001|ce:circCWF19L2-874-001|ts:circCWF19L2-773-002"; tissue "lv|ce|ts";
11	ncSplice	exon	107416209	107416298	.	-	.	gene_id "ENSG00000152404"; transcript_id "hsCircRNA-44"; exon_number "3" gene_name "CWF19L2"; gene_biotype "protein_coding"; oId "lv:circCWF19L2-205-001|ce:circCWF19L2-874-001|ts:circCWF19L2-773-002"; tissue "lv|ce|ts";
11	ncSplice	exon	107418194	107418287	.	-	.	gene_id "ENSG00000152404"; transcript_id "hsCircRNA-44"; exon_number "4" gene_name "CWF19L2"; gene_biotype "protein_coding"; oId "lv:circCWF19L2-205-001|ce:circCWF19L2-874-001|ts:circCWF19L2-773-002"; tissue "lv|ce|ts";
11	ncSplice	gene	108176246	108177090	.	-	.	gene_id "ENSG00000149308"; gene_name "NPAT"; gene_source "ncSplice"; gene_biotype "protein_coding";
11	ncSplice	transcript	108176246	108177090	.	-	.	gene_id "ENSG00000149308"; transcript_id "hsCircRNA-45"; gene_name "NPAT"; gene_biotype "protein_coding"; transcript_biotype "circRNA"; oId "lv:circNPAT-206-001"; tissue "lv";
11	ncSplice	exon	108176246	108176374	.	-	.	gene_id "ENSG00000149308"; transcript_id "hsCircRNA-45"; exon_number "1" gene_name "NPAT"; gene_biotype "protein_coding"; oId "lv:circNPAT-206-001"; tissue "lv";
11	ncSplice	exon	108176994	108177090	.	-	.	gene_id "ENSG00000149308"; transcript_id "hsCircRNA-45"; exon_number "2" gene_name "NPAT"; gene_biotype "protein_coding"; oId "lv:circNPAT-206-001"; tissue "lv";
11	ncSplice	gene	120406118	120407823	.	+	.	gene_id "ENSG00000196914"; gene_name "ARHGEF12"; gene_source "ncSplice"; gene_biotype "protein_coding";
11	ncSplice	transcript	120406118	120407823	.	+	.	gene_id "ENSG00000196914"; transcript_id "hsCircRNA-46"; gene_name "ARHGEF12"; gene_biotype "protein_coding"; transcript_biotype "circRNA"; oId "lv:circARHGEF12-225-001"; tissue "lv";
11	ncSplice	exon	120406118	120406141	.	+	.	gene_id "ENSG00000196914"; transcript_id "hsCircRNA-46"; exon_number "1" gene_name "ARHGEF12"; gene_biotype "protein_coding"; oId "lv:circARHGEF12-225-001"; tissue "lv";
11	ncSplice	exon	120407738	120407823	.	+	.	gene_id "ENSG00000196914"; transcript_id "hsCircRNA-46"; exon_number "2" gene_name "ARHGEF12"; gene_biotype "protein_coding"; oId "lv:circARHGEF12-225-001"; tissue "lv";
11	ncSplice	gene	120473050	120477526	.	+	.	gene_id "ENSG00000196914"; gene_name "ARHGEF12"; gene_source "ncSplice"; gene_biotype "protein_coding";
11	ncSplice	transcript	120473050	120477526	.	+	.	gene_id "ENSG00000196914"; transcript_id "hsCircRNA-47"; gene_name "ARHGEF12"; gene_biotype "protein_coding"; transcript_biotype "circRNA"; oId "lv:circARHGEF12-229-001|ce:circARHGEF12-1016-002"; tissue "lv|ce";
11	ncSplice	exon	120473050	120473127	.	+	.	gene_id "ENSG00000196914"; transcript_id "hsCircRNA-47"; exon_number "1" gene_name "ARHGEF12"; gene_biotype "protein_coding"; oId "lv:circARHGEF12-229-001|ce:circARHGEF12-1016-002"; tissue "lv|ce";
11	ncSplice	exon	120474560	120474635	.	+	.	gene_id "ENSG00000196914"; transcript_id "hsCircRNA-47"; exon_number "2" gene_name "ARHGEF12"; gene_biotype "protein_coding"; oId "lv:circARHGEF12-229-001|ce:circARHGEF12-1016-002"; tissue "lv|ce";
11	ncSplice	exon	120475340	120475507	.	+	.	gene_id "ENSG00000196914"; transcript_id "hsCircRNA-47"; exon_number "3" gene_name "ARHGEF12"; gene_biotype "protein_coding"; oId "lv:circARHGEF12-229-001|ce:circARHGEF12-1016-002"; tissue "lv|ce";
11	ncSplice	exon	120476661	120476748	.	+	.	gene_id "ENSG00000196914"; transcript_id "hsCircRNA-47"; exon_number "4" gene_name "ARHGEF12"; gene_biotype "protein_coding"; oId "lv:circARHGEF12-229-001|ce:circARHGEF12-1016-002"; tissue "lv|ce";
11	ncSplice	exon	120477219	120477305	.	+	.	gene_id "ENSG00000196914"; transcript_id "hsCircRNA-47"; exon_number "5" gene_name "ARHGEF12"; gene_biotype "protein_coding"; oId "lv:circARHGEF12-229-001|ce:circARHGEF12-1016-002"; tissue "lv|ce";
11	ncSplice	exon	120477447	120477526	.	+	.	gene_id "ENSG00000196914"; transcript_id "hsCircRNA-47"; exon_number "6" gene_name "ARHGEF12"; gene_biotype "protein_coding"; oId "lv:circARHGEF12-229-001|ce:circARHGEF12-1016-002"; tissue "lv|ce";
11	ncSplice	gene	120474560	120477526	.	+	.	gene_id "ENSG00000196914"; gene_name "ARHGEF12"; gene_source "ncSplice"; gene_biotype "protein_coding";
11	ncSplice	transcript	120474560	120477526	.	+	.	gene_id "ENSG00000196914"; transcript_id "hsCircRNA-48"; gene_name "ARHGEF12"; gene_biotype "protein_coding"; transcript_biotype "circRNA"; oId "lv:circARHGEF12-230-001|ce:circARHGEF12-1017-002"; tissue "lv|ce";
11	ncSplice	exon	120474560	120474635	.	+	.	gene_id "ENSG00000196914"; transcript_id "hsCircRNA-48"; exon_number "1" gene_name "ARHGEF12"; gene_biotype "protein_coding"; oId "lv:circARHGEF12-230-001|ce:circARHGEF12-1017-002"; tissue "lv|ce";
11	ncSplice	exon	120475340	120475507	.	+	.	gene_id "ENSG00000196914"; transcript_id "hsCircRNA-48"; exon_number "2" gene_name "ARHGEF12"; gene_biotype "protein_coding"; oId "lv:circARHGEF12-230-001|ce:circARHGEF12-1017-002"; tissue "lv|ce";
11	ncSplice	exon	120476661	120476748	.	+	.	gene_id "ENSG00000196914"; transcript_id "hsCircRNA-48"; exon_number "3" gene_name "ARHGEF12"; gene_biotype "protein_coding"; oId "lv:circARHGEF12-230-001|ce:circARHGEF12-1017-002"; tissue "lv|ce";
11	ncSplice	exon	120477219	120477305	.	+	.	gene_id "ENSG00000196914"; transcript_id "hsCircRNA-48"; exon_number "4" gene_name "ARHGEF12"; gene_biotype "protein_coding"; oId "lv:circARHGEF12-230-001|ce:circARHGEF12-1017-002"; tissue "lv|ce";
11	ncSplice	exon	120477447	120477526	.	+	.	gene_id "ENSG00000196914"; transcript_id "hsCircRNA-48"; exon_number "5" gene_name "ARHGEF12"; gene_biotype "protein_coding"; oId "lv:circARHGEF12-230-001|ce:circARHGEF12-1017-002"; tissue "lv|ce";
11	ncSplice	gene	121045674	121060085	.	+	.	gene_id "ENSG00000154114"; gene_name "TBCEL"; gene_source "ncSplice"; gene_biotype "protein_coding";
11	ncSplice	transcript	121045674	121060085	.	+	.	gene_id "ENSG00000154114"; transcript_id "hsCircRNA-49"; gene_name "TBCEL"; gene_biotype "protein_coding"; transcript_biotype "circRNA"; oId "lv:circTBCEL-231-001|ce:circTBCEL-1024-004|ts:circTBCEL-866-004"; tissue "lv|ce|ts";
11	ncSplice	exon	121045674	121045823	.	+	.	gene_id "ENSG00000154114"; transcript_id "hsCircRNA-49"; exon_number "1" gene_name "TBCEL"; gene_biotype "protein_coding"; oId "lv:circTBCEL-231-001|ce:circTBCEL-1024-004|ts:circTBCEL-866-004"; tissue "lv|ce|ts";
11	ncSplice	exon	121047528	121047667	.	+	.	gene_id "ENSG00000154114"; transcript_id "hsCircRNA-49"; exon_number "2" gene_name "TBCEL"; gene_biotype "protein_coding"; oId "lv:circTBCEL-231-001|ce:circTBCEL-1024-004|ts:circTBCEL-866-004"; tissue "lv|ce|ts";
11	ncSplice	exon	121053551	121053732	.	+	.	gene_id "ENSG00000154114"; transcript_id "hsCircRNA-49"; exon_number "3" gene_name "TBCEL"; gene_biotype "protein_coding"; oId "lv:circTBCEL-231-001|ce:circTBCEL-1024-004|ts:circTBCEL-866-004"; tissue "lv|ce|ts";
11	ncSplice	exon	121055052	121055308	.	+	.	gene_id "ENSG00000154114"; transcript_id "hsCircRNA-49"; exon_number "4" gene_name "TBCEL"; gene_biotype "protein_coding"; oId "lv:circTBCEL-231-001|ce:circTBCEL-1024-004|ts:circTBCEL-866-004"; tissue "lv|ce|ts";
11	ncSplice	exon	121058345	121058471	.	+	.	gene_id "ENSG00000154114"; transcript_id "hsCircRNA-49"; exon_number "5" gene_name "TBCEL"; gene_biotype "protein_coding"; oId "lv:circTBCEL-231-001|ce:circTBCEL-1024-004|ts:circTBCEL-866-004"; tissue "lv|ce|ts";
11	ncSplice	exon	121059969	121060085	.	+	.	gene_id "ENSG00000154114"; transcript_id "hsCircRNA-49"; exon_number "6" gene_name "TBCEL"; gene_biotype "protein_coding"; oId "lv:circTBCEL-231-001|ce:circTBCEL-1024-004|ts:circTBCEL-866-004"; tissue "lv|ce|ts";
11	ncSplice	gene	1286002	1295794	.	-	.	gene_id "ENSG00000078902"; gene_name "TOLLIP"; gene_source "ncSplice"; gene_biotype "protein_coding";
11	ncSplice	transcript	1286002	1295794	.	-	.	gene_id "ENSG00000078902"; transcript_id "hsCircRNA-50"; gene_name "TOLLIP"; gene_biotype "protein_coding"; transcript_biotype "circRNA"; oId "lv:circTOLLIP-239-001"; tissue "lv";
11	ncSplice	exon	1286002	1286092	.	-	.	gene_id "ENSG00000078902"; transcript_id "hsCircRNA-50"; exon_number "1" gene_name "TOLLIP"; gene_biotype "protein_coding"; oId "lv:circTOLLIP-239-001"; tissue "lv";
11	ncSplice	exon	1288624	1288776	.	-	.	gene_id "ENSG00000078902"; transcript_id "hsCircRNA-50"; exon_number "2" gene_name "TOLLIP"; gene_biotype "protein_coding"; oId "lv:circTOLLIP-239-001"; tissue "lv";
11	ncSplice	exon	1290227	1290409	.	-	.	gene_id "ENSG00000078902"; transcript_id "hsCircRNA-50"; exon_number "3" gene_name "TOLLIP"; gene_biotype "protein_coding"; oId "lv:circTOLLIP-239-001"; tissue "lv";
11	ncSplice	exon	1295645	1295794	.	-	.	gene_id "ENSG00000078902"; transcript_id "hsCircRNA-50"; exon_number "4" gene_name "TOLLIP"; gene_biotype "protein_coding"; oId "lv:circTOLLIP-239-001"; tissue "lv";
11	ncSplice	gene	13413530	13421838	.	-	.	gene_id "ENSG00000148925"; gene_name "BTBD10"; gene_source "ncSplice"; gene_biotype "protein_coding";
11	ncSplice	transcript	13413530	13421838	.	-	.	gene_id "ENSG00000148925"; transcript_id "hsCircRNA-51"; gene_name "BTBD10"; gene_biotype "protein_coding"; transcript_biotype "circRNA"; oId "lv:circBTBD10-249-001|ce:circBTBD10-1081-002|ts:circBTBD10-904-001"; tissue "lv|ce|ts";
11	ncSplice	exon	13413530	13413650	.	-	.	gene_id "ENSG00000148925"; transcript_id "hsCircRNA-51"; exon_number "1" gene_name "BTBD10"; gene_biotype "protein_coding"; oId "lv:circBTBD10-249-001|ce:circBTBD10-1081-002|ts:circBTBD10-904-001"; tissue "lv|ce|ts";
11	ncSplice	exon	13417158	13417260	.	-	.	gene_id "ENSG00000148925"; transcript_id "hsCircRNA-51"; exon_number "2" gene_name "BTBD10"; gene_biotype "protein_coding"; oId "lv:circBTBD10-249-001|ce:circBTBD10-1081-002|ts:circBTBD10-904-001"; tissue "lv|ce|ts";
11	ncSplice	exon	13419460	13419745	.	-	.	gene_id "ENSG00000148925"; transcript_id "hsCircRNA-51"; exon_number "3" gene_name "BTBD10"; gene_biotype "protein_coding"; oId "lv:circBTBD10-249-001|ce:circBTBD10-1081-002|ts:circBTBD10-904-001"; tissue "lv|ce|ts";
11	ncSplice	exon	13421642	13421838	.	-	.	gene_id "ENSG00000148925"; transcript_id "hsCircRNA-51"; exon_number "4" gene_name "BTBD10"; gene_biotype "protein_coding"; oId "lv:circBTBD10-249-001|ce:circBTBD10-1081-002|ts:circBTBD10-904-001"; tissue "lv|ce|ts";
1	ncSplice	gene	114463104	114464388	.	-	.	gene_id "ENSG00000197323"; gene_name "TRIM33"; gene_source "ncSplice"; gene_biotype "protein_coding";
1	ncSplice	transcript	114463104	114464388	.	-	.	gene_id "ENSG00000197323"; transcript_id "hsCircRNA-52"; gene_name "TRIM33"; gene_biotype "protein_coding"; transcript_biotype "circRNA"; oId "lv:circTRIM33-257-001|ce:circTRIM33-1106-001"; tissue "lv|ce";
1	ncSplice	exon	114463104	114463236	.	-	.	gene_id "ENSG00000197323"; transcript_id "hsCircRNA-52"; exon_number "1" gene_name "TRIM33"; gene_biotype "protein_coding"; oId "lv:circTRIM33-257-001|ce:circTRIM33-1106-001"; tissue "lv|ce";
1	ncSplice	exon	114463412	114463556	.	-	.	gene_id "ENSG00000197323"; transcript_id "hsCircRNA-52"; exon_number "2" gene_name "TRIM33"; gene_biotype "protein_coding"; oId "lv:circTRIM33-257-001|ce:circTRIM33-1106-001"; tissue "lv|ce";
1	ncSplice	exon	114464270	114464388	.	-	.	gene_id "ENSG00000197323"; transcript_id "hsCircRNA-52"; exon_number "3" gene_name "TRIM33"; gene_biotype "protein_coding"; oId "lv:circTRIM33-257-001|ce:circTRIM33-1106-001"; tissue "lv|ce";
1	ncSplice	gene	117402186	117414831	.	+	.	gene_id "ENSG00000198162"; gene_name "MAN1A2"; gene_source "ncSplice"; gene_biotype "protein_coding";
1	ncSplice	transcript	117402186	117414831	.	+	.	gene_id "ENSG00000198162"; transcript_id "hsCircRNA-53"; gene_name "MAN1A2"; gene_biotype "protein_coding"; transcript_biotype "circRNA"; oId "lv:circMAN1A2-262-001|ce:circMAN1A2-1145-002|ts:circMAN1A2-958-001"; tissue "lv|ce|ts";
1	ncSplice	exon	117402186	117402441	.	+	.	gene_id "ENSG00000198162"; transcript_id "hsCircRNA-53"; exon_number "1" gene_name "MAN1A2"; gene_biotype "protein_coding"; oId "lv:circMAN1A2-262-001|ce:circMAN1A2-1145-002|ts:circMAN1A2-958-001"; tissue "lv|ce|ts";
1	ncSplice	exon	117405549	117405645	.	+	.	gene_id "ENSG00000198162"; transcript_id "hsCircRNA-53"; exon_number "2" gene_name "MAN1A2"; gene_biotype "protein_coding"; oId "lv:circMAN1A2-262-001|ce:circMAN1A2-1145-002|ts:circMAN1A2-958-001"; tissue "lv|ce|ts";
1	ncSplice	exon	117414713	117414831	.	+	.	gene_id "ENSG00000198162"; transcript_id "hsCircRNA-53"; exon_number "3" gene_name "MAN1A2"; gene_biotype "protein_coding"; oId "lv:circMAN1A2-262-001|ce:circMAN1A2-1145-002|ts:circMAN1A2-958-001"; tissue "lv|ce|ts";
1	ncSplice	gene	117402186	117420649	.	+	.	gene_id "ENSG00000198162"; gene_name "MAN1A2"; gene_source "ncSplice"; gene_biotype "protein_coding";
1	ncSplice	transcript	117402186	117420649	.	+	.	gene_id "ENSG00000198162"; transcript_id "hsCircRNA-54"; gene_name "MAN1A2"; gene_biotype "protein_coding"; transcript_biotype "circRNA"; oId "lv:circMAN1A2-263-001"; tissue "lv";
1	ncSplice	exon	117402186	117402441	.	+	.	gene_id "ENSG00000198162"; transcript_id "hsCircRNA-54"; exon_number "1" gene_name "MAN1A2"; gene_biotype "protein_coding"; oId "lv:circMAN1A2-263-001"; tissue "lv";
1	ncSplice	exon	117405549	117405645	.	+	.	gene_id "ENSG00000198162"; transcript_id "hsCircRNA-54"; exon_number "2" gene_name "MAN1A2"; gene_biotype "protein_coding"; oId "lv:circMAN1A2-263-001"; tissue "lv";
1	ncSplice	exon	117414713	117414831	.	+	.	gene_id "ENSG00000198162"; transcript_id "hsCircRNA-54"; exon_number "3" gene_name "MAN1A2"; gene_biotype "protein_coding"; oId "lv:circMAN1A2-263-001"; tissue "lv";
1	ncSplice	exon	117420569	117420649	.	+	.	gene_id "ENSG00000198162"; transcript_id "hsCircRNA-54"; exon_number "4" gene_name "MAN1A2"; gene_biotype "protein_coding"; oId "lv:circMAN1A2-263-001"; tissue "lv";
1	ncSplice	gene	1223244	1223968	.	-	.	gene_id "ENSG00000078808"; gene_name "SDF4"; gene_source "ncSplice"; gene_biotype "protein_coding";
1	ncSplice	transcript	1223244	1223968	.	-	.	gene_id "ENSG00000078808"; transcript_id "hsCircRNA-55"; gene_name "SDF4"; gene_biotype "protein_coding"; transcript_biotype "circRNA"; oId "lv:circSDF4-271-001|ce:circSDF4-1193-001|ts:circSDF4-988-001"; tissue "lv|ce|ts";
1	ncSplice	exon	1223244	1223357	.	-	.	gene_id "ENSG00000078808"; transcript_id "hsCircRNA-55"; exon_number "1" gene_name "SDF4"; gene_biotype "protein_coding"; oId "lv:circSDF4-271-001|ce:circSDF4-1193-001|ts:circSDF4-988-001"; tissue "lv|ce|ts";
1	ncSplice	exon	1223832	1223968	.	-	.	gene_id "ENSG00000078808"; transcript_id "hsCircRNA-55"; exon_number "2" gene_name "SDF4"; gene_biotype "protein_coding"; oId "lv:circSDF4-271-001|ce:circSDF4-1193-001|ts:circSDF4-988-001"; tissue "lv|ce|ts";
1	ncSplice	gene	12578718	12579412	.	-	.	gene_id "ENSG00000162496"; gene_name "DHRS3"; gene_source "ncSplice"; gene_biotype "protein_coding";
1	ncSplice	transcript	12578718	12579412	.	-	.	gene_id "ENSG00000162496"; transcript_id "hsCircRNA-56"; gene_name "DHRS3"; gene_biotype "protein_coding"; transcript_biotype "circRNA"; oId "lv:circDHRS3-276-001"; tissue "lv";
1	ncSplice	exon	12578718	12578956	.	-	.	gene_id "ENSG00000162496"; transcript_id "hsCircRNA-56"; exon_number "1" gene_name "DHRS3"; gene_biotype "protein_coding"; oId "lv:circDHRS3-276-001"; tissue "lv";
1	ncSplice	exon	12579293	12579412	.	-	.	gene_id "ENSG00000162496"; transcript_id "hsCircRNA-56"; exon_number "2" gene_name "DHRS3"; gene_biotype "protein_coding"; oId "lv:circDHRS3-276-001"; tissue "lv";
11	ncSplice	gene	34970139	34984728	.	+	.	gene_id "ENSG00000110435"; gene_name "PDHX"; gene_source "ncSplice"; gene_biotype "protein_coding";
11	ncSplice	transcript	34970139	34984728	.	+	.	gene_id "ENSG00000110435"; transcript_id "hsCircRNA-57"; gene_name "PDHX"; gene_biotype "protein_coding"; transcript_biotype "circRNA"; oId "lv:circPDHX-285-001|ts:circPDHX-1067-002"; tissue "lv|ts";
11	ncSplice	exon	34970139	34970286	.	+	.	gene_id "ENSG00000110435"; transcript_id "hsCircRNA-57"; exon_number "1" gene_name "PDHX"; gene_biotype "protein_coding"; oId "lv:circPDHX-285-001|ts:circPDHX-1067-002"; tissue "lv|ts";
11	ncSplice	exon	34978124	34978182	.	+	.	gene_id "ENSG00000110435"; transcript_id "hsCircRNA-57"; exon_number "2" gene_name "PDHX"; gene_biotype "protein_coding"; oId "lv:circPDHX-285-001|ts:circPDHX-1067-002"; tissue "lv|ts";
11	ncSplice	exon	34984570	34984728	.	+	.	gene_id "ENSG00000110435"; transcript_id "hsCircRNA-57"; exon_number "3" gene_name "PDHX"; gene_biotype "protein_coding"; oId "lv:circPDHX-285-001|ts:circPDHX-1067-002"; tissue "lv|ts";
11	ncSplice	gene	3773632	3776021	.	-	.	gene_id "ENSG00000110713"; gene_name "NUP98"; gene_source "ncSplice"; gene_biotype "protein_coding";
11	ncSplice	transcript	3773632	3776021	.	-	.	gene_id "ENSG00000110713"; transcript_id "hsCircRNA-58"; gene_name "NUP98"; gene_biotype "protein_coding"; transcript_biotype "circRNA"; oId "lv:circNUP98-289-001|ce:circNUP98-1266-001|ts:circNUP98-1097-001"; tissue "lv|ce|ts";
11	ncSplice	exon	3773632	3773739	.	-	.	gene_id "ENSG00000110713"; transcript_id "hsCircRNA-58"; exon_number "1" gene_name "NUP98"; gene_biotype "protein_coding"; oId "lv:circNUP98-289-001|ce:circNUP98-1266-001|ts:circNUP98-1097-001"; tissue "lv|ce|ts";
11	ncSplice	exon	3775882	3776021	.	-	.	gene_id "ENSG00000110713"; transcript_id "hsCircRNA-58"; exon_number "2" gene_name "NUP98"; gene_biotype "protein_coding"; oId "lv:circNUP98-289-001|ce:circNUP98-1266-001|ts:circNUP98-1097-001"; tissue "lv|ce|ts";
1	ncSplice	gene	145643869	145647267	.	+	.	gene_id "ENSG00000117262"; gene_name "GPR89A"; gene_source "ncSplice"; gene_biotype "protein_coding";
1	ncSplice	transcript	145643869	145647267	.	+	.	gene_id "ENSG00000117262"; transcript_id "hsCircRNA-59"; gene_name "GPR89A"; gene_biotype "protein_coding"; transcript_biotype "circRNA"; oId "lv:circGPR89A-292-001|ce:circGPR89A-1291-001"; tissue "lv|ce";
1	ncSplice	exon	145643869	145644067	.	+	.	gene_id "ENSG00000117262"; transcript_id "hsCircRNA-59"; exon_number "1" gene_name "GPR89A"; gene_biotype "protein_coding"; oId "lv:circGPR89A-292-001|ce:circGPR89A-1291-001"; tissue "lv|ce";
1	ncSplice	exon	145647175	145647267	.	+	.	gene_id "ENSG00000117262"; transcript_id "hsCircRNA-59"; exon_number "2" gene_name "GPR89A"; gene_biotype "protein_coding"; oId "lv:circGPR89A-292-001|ce:circGPR89A-1291-001"; tissue "lv|ce";
1	ncSplice	gene	147275354	147285487	.	+	.	gene_id "ENSG00000131778"; gene_name "CHD1L"; gene_source "ncSplice"; gene_biotype "protein_coding";
1	ncSplice	transcript	147275354	147285487	.	+	.	gene_id "ENSG00000131778"; transcript_id "hsCircRNA-60"; gene_name "CHD1L"; gene_biotype "protein_coding"; transcript_biotype "circRNA"; oId "lv:circCHD1L-302-001|ce:circCHD1L-1325-001"; tissue "lv|ce";
1	ncSplice	exon	147275354	147275468	.	+	.	gene_id "ENSG00000131778"; transcript_id "hsCircRNA-60"; exon_number "1" gene_name "CHD1L"; gene_biotype "protein_coding"; oId "lv:circCHD1L-302-001|ce:circCHD1L-1325-001"; tissue "lv|ce";
1	ncSplice	exon	147276104	147276257	.	+	.	gene_id "ENSG00000131778"; transcript_id "hsCircRNA-60"; exon_number "2" gene_name "CHD1L"; gene_biotype "protein_coding"; oId "lv:circCHD1L-302-001|ce:circCHD1L-1325-001"; tissue "lv|ce";
1	ncSplice	exon	147280026	147280191	.	+	.	gene_id "ENSG00000131778"; transcript_id "hsCircRNA-60"; exon_number "3" gene_name "CHD1L"; gene_biotype "protein_coding"; oId "lv:circCHD1L-302-001|ce:circCHD1L-1325-001"; tissue "lv|ce";
1	ncSplice	exon	147284351	147284499	.	+	.	gene_id "ENSG00000131778"; transcript_id "hsCircRNA-60"; exon_number "4" gene_name "CHD1L"; gene_biotype "protein_coding"; oId "lv:circCHD1L-302-001|ce:circCHD1L-1325-001"; tissue "lv|ce";
1	ncSplice	exon	147285324	147285487	.	+	.	gene_id "ENSG00000131778"; transcript_id "hsCircRNA-60"; exon_number "5" gene_name "CHD1L"; gene_biotype "protein_coding"; oId "lv:circCHD1L-302-001|ce:circCHD1L-1325-001"; tissue "lv|ce";
1	ncSplice	gene	147966554	147969959	.	+	.	gene_id "ENSG00000188092"; gene_name "GPR89B"; gene_source "ncSplice"; gene_biotype "protein_coding";
1	ncSplice	transcript	147966554	147969959	.	+	.	gene_id "ENSG00000188092"; transcript_id "hsCircRNA-61"; gene_name "GPR89B"; gene_biotype "protein_coding"; transcript_biotype "circRNA"; oId "lv:circGPR89B-311-001|ce:circGPR89B-1351-001|ts:circGPR89B-1185-001"; tissue "lv|ce|ts";
1	ncSplice	exon	147966554	147966663	.	+	.	gene_id "ENSG00000188092"; transcript_id "hsCircRNA-61"; exon_number "1" gene_name "GPR89B"; gene_biotype "protein_coding"; oId "lv:circGPR89B-311-001|ce:circGPR89B-1351-001|ts:circGPR89B-1185-001"; tissue "lv|ce|ts";
1	ncSplice	exon	147968332	147968428	.	+	.	gene_id "ENSG00000188092"; transcript_id "hsCircRNA-61"; exon_number "2" gene_name "GPR89B"; gene_biotype "protein_coding"; oId "lv:circGPR89B-311-001|ce:circGPR89B-1351-001|ts:circGPR89B-1185-001"; tissue "lv|ce|ts";
1	ncSplice	exon	147968875	147968963	.	+	.	gene_id "ENSG00000188092"; transcript_id "hsCircRNA-61"; exon_number "3" gene_name "GPR89B"; gene_biotype "protein_coding"; oId "lv:circGPR89B-311-001|ce:circGPR89B-1351-001|ts:circGPR89B-1185-001"; tissue "lv|ce|ts";
1	ncSplice	exon	147969867	147969959	.	+	.	gene_id "ENSG00000188092"; transcript_id "hsCircRNA-61"; exon_number "4" gene_name "GPR89B"; gene_biotype "protein_coding"; oId "lv:circGPR89B-311-001|ce:circGPR89B-1351-001|ts:circGPR89B-1185-001"; tissue "lv|ce|ts";
1	ncSplice	gene	149655699	149669310	.	+	.	gene_id "ENSG00000277147"; gene_name "LINC00869"; gene_source "ncSplice"; gene_biotype "lincRNA";
1	ncSplice	transcript	149655699	149669310	.	+	.	gene_id "ENSG00000277147"; transcript_id "hsCircRNA-62"; gene_name "LINC00869"; gene_biotype "lincRNA"; transcript_biotype "circRNA"; oId "lv:circLINC00869-313-003"; tissue "lv";
1	ncSplice	exon	149655699	149655908	.	+	.	gene_id "ENSG00000277147"; transcript_id "hsCircRNA-62"; exon_number "1" gene_name "LINC00869"; gene_biotype "lincRNA"; oId "lv:circLINC00869-313-003"; tissue "lv";
1	ncSplice	exon	149660854	149661089	.	+	.	gene_id "ENSG00000277147"; transcript_id "hsCircRNA-62"; exon_number "2" gene_name "LINC00869"; gene_biotype "lincRNA"; oId "lv:circLINC00869-313-003"; tissue "lv";
1	ncSplice	exon	149668300	149668458	.	+	.	gene_id "ENSG00000277147"; transcript_id "hsCircRNA-62"; exon_number "3" gene_name "LINC00869"; gene_biotype "lincRNA"; oId "lv:circLINC00869-313-003"; tissue "lv";
1	ncSplice	exon	149669189	149669310	.	+	.	gene_id "ENSG00000277147"; transcript_id "hsCircRNA-62"; exon_number "4" gene_name "LINC00869"; gene_biotype "lincRNA"; oId "lv:circLINC00869-313-003"; tissue "lv";
1	ncSplice	gene	150492411	150496908	.	+	.	gene_id "ENSG00000143374"; gene_name "TARS2"; gene_source "ncSplice"; gene_biotype "protein_coding";
1	ncSplice	transcript	150492411	150496908	.	+	.	gene_id "ENSG00000143374"; transcript_id "hsCircRNA-63"; gene_name "TARS2"; gene_biotype "protein_coding"; transcript_biotype "circRNA"; oId "lv:circTARS2-315-001|ce:circTARS2-1378-001"; tissue "lv|ce";
1	ncSplice	exon	150492411	150492489	.	+	.	gene_id "ENSG00000143374"; transcript_id "hsCircRNA-63"; exon_number "1" gene_name "TARS2"; gene_biotype "protein_coding"; oId "lv:circTARS2-315-001|ce:circTARS2-1378-001"; tissue "lv|ce";
1	ncSplice	exon	150496482	150496628	.	+	.	gene_id "ENSG00000143374"; transcript_id "hsCircRNA-63"; exon_number "2" gene_name "TARS2"; gene_biotype "protein_coding"; oId "lv:circTARS2-315-001|ce:circTARS2-1378-001"; tissue "lv|ce";
1	ncSplice	exon	150496810	150496908	.	+	.	gene_id "ENSG00000143374"; transcript_id "hsCircRNA-63"; exon_number "3" gene_name "TARS2"; gene_biotype "protein_coding"; oId "lv:circTARS2-315-001|ce:circTARS2-1378-001"; tissue "lv|ce";
1	ncSplice	gene	151024611	151025673	.	+	.	gene_id "ENSG00000143363"; gene_name "PRUNE"; gene_source "ncSplice"; gene_biotype "protein_coding";
1	ncSplice	transcript	151024611	151025673	.	+	.	gene_id "ENSG00000143363"; transcript_id "hsCircRNA-64"; gene_name "PRUNE"; gene_biotype "protein_coding"; transcript_biotype "circRNA"; oId "lv:circPRUNE-319-001|ce:circPRUNE-1384-001|ts:circPRUNE-1219-001"; tissue "lv|ce|ts";
1	ncSplice	exon	151024611	151024795	.	+	.	gene_id "ENSG00000143363"; transcript_id "hsCircRNA-64"; exon_number "1" gene_name "PRUNE"; gene_biotype "protein_coding"; oId "lv:circPRUNE-319-001|ce:circPRUNE-1384-001|ts:circPRUNE-1219-001"; tissue "lv|ce|ts";
1	ncSplice	exon	151025515	151025673	.	+	.	gene_id "ENSG00000143363"; transcript_id "hsCircRNA-64"; exon_number "2" gene_name "PRUNE"; gene_biotype "protein_coding"; oId "lv:circPRUNE-319-001|ce:circPRUNE-1384-001|ts:circPRUNE-1219-001"; tissue "lv|ce|ts";
1	ncSplice	gene	155395459	155459898	.	-	.	gene_id "ENSG00000116539"; gene_name "ASH1L"; gene_source "ncSplice"; gene_biotype "protein_coding";
1	ncSplice	transcript	155395459	155459898	.	-	.	gene_id "ENSG00000116539"; transcript_id "hsCircRNA-65"; gene_name "ASH1L"; gene_biotype "protein_coding"; transcript_biotype "circRNA"; oId "lv:circASH1L-343-001|ce:circASH1L-1452-034|ts:circASH1L-1296-321"; tissue "lv|ce|ts";
1	ncSplice	exon	155395459	155395553	.	-	.	gene_id "ENSG00000116539"; transcript_id "hsCircRNA-65"; exon_number "1" gene_name "ASH1L"; gene_biotype "protein_coding"; oId "lv:circASH1L-343-001|ce:circASH1L-1452-034|ts:circASH1L-1296-321"; tissue "lv|ce|ts";
1	ncSplice	exon	155415744	155415923	.	-	.	gene_id "ENSG00000116539"; transcript_id "hsCircRNA-65"; exon_number "2" gene_name "ASH1L"; gene_biotype "protein_coding"; oId "lv:circASH1L-343-001|ce:circASH1L-1452-034|ts:circASH1L-1296-321"; tissue "lv|ce|ts";
1	ncSplice	exon	155438327	155439068	.	-	.	gene_id "ENSG00000116539"; transcript_id "hsCircRNA-65"; exon_number "3" gene_name "ASH1L"; gene_biotype "protein_coding"; oId "lv:circASH1L-343-001|ce:circASH1L-1452-034|ts:circASH1L-1296-321"; tissue "lv|ce|ts";
1	ncSplice	exon	155459797	155459898	.	-	.	gene_id "ENSG00000116539"; transcript_id "hsCircRNA-65"; exon_number "4" gene_name "ASH1L"; gene_biotype "protein_coding"; oId "lv:circASH1L-343-001|ce:circASH1L-1452-034|ts:circASH1L-1296-321"; tissue "lv|ce|ts";
1	ncSplice	gene	155415744	155459898	.	-	.	gene_id "ENSG00000116539"; gene_name "ASH1L"; gene_source "ncSplice"; gene_biotype "protein_coding";
1	ncSplice	transcript	155415744	155459898	.	-	.	gene_id "ENSG00000116539"; transcript_id "hsCircRNA-66"; gene_name "ASH1L"; gene_biotype "protein_coding"; transcript_biotype "circRNA"; oId "lv:circASH1L-344-001|ce:circASH1L-1454-006"; tissue "lv|ce";
1	ncSplice	exon	155415744	155415923	.	-	.	gene_id "ENSG00000116539"; transcript_id "hsCircRNA-66"; exon_number "1" gene_name "ASH1L"; gene_biotype "protein_coding"; oId "lv:circASH1L-344-001|ce:circASH1L-1454-006"; tissue "lv|ce";
1	ncSplice	exon	155438327	155439068	.	-	.	gene_id "ENSG00000116539"; transcript_id "hsCircRNA-66"; exon_number "2" gene_name "ASH1L"; gene_biotype "protein_coding"; oId "lv:circASH1L-344-001|ce:circASH1L-1454-006"; tissue "lv|ce";
1	ncSplice	exon	155459797	155459898	.	-	.	gene_id "ENSG00000116539"; transcript_id "hsCircRNA-66"; exon_number "3" gene_name "ASH1L"; gene_biotype "protein_coding"; oId "lv:circASH1L-344-001|ce:circASH1L-1454-006"; tissue "lv|ce";
1	ncSplice	gene	155438327	155459898	.	-	.	gene_id "ENSG00000116539"; gene_name "ASH1L"; gene_source "ncSplice"; gene_biotype "protein_coding";
1	ncSplice	transcript	155438327	155459898	.	-	.	gene_id "ENSG00000116539"; transcript_id "hsCircRNA-67"; gene_name "ASH1L"; gene_biotype "protein_coding"; transcript_biotype "circRNA"; oId "lv:circASH1L-345-001|ce:circASH1L-1455-003|ts:circASH1L-1302-011"; tissue "lv|ce|ts";
1	ncSplice	exon	155438327	155439068	.	-	.	gene_id "ENSG00000116539"; transcript_id "hsCircRNA-67"; exon_number "1" gene_name "ASH1L"; gene_biotype "protein_coding"; oId "lv:circASH1L-345-001|ce:circASH1L-1455-003|ts:circASH1L-1302-011"; tissue "lv|ce|ts";
1	ncSplice	exon	155459797	155459898	.	-	.	gene_id "ENSG00000116539"; transcript_id "hsCircRNA-67"; exon_number "2" gene_name "ASH1L"; gene_biotype "protein_coding"; oId "lv:circASH1L-345-001|ce:circASH1L-1455-003|ts:circASH1L-1302-011"; tissue "lv|ce|ts";
1	ncSplice	gene	155675010	155679512	.	-	.	gene_id "ENSG00000163374"; gene_name "YY1AP1"; gene_source "ncSplice"; gene_biotype "protein_coding";
1	ncSplice	transcript	155675010	155679512	.	-	.	gene_id "ENSG00000163374"; transcript_id "hsCircRNA-68"; gene_name "YY1AP1"; gene_biotype "protein_coding"; transcript_biotype "circRNA"; oId "lv:circYY1AP1-347-002|ce:circYY1AP1-1457-001|ts:circYY1AP1-1304-003"; tissue "lv|ce|ts";
1	ncSplice	exon	155675010	155675096	.	-	.	gene_id "ENSG00000163374"; transcript_id "hsCircRNA-68"; exon_number "1" gene_name "YY1AP1"; gene_biotype "protein_coding"; oId "lv:circYY1AP1-347-002|ce:circYY1AP1-1457-001|ts:circYY1AP1-1304-003"; tissue "lv|ce|ts";
1	ncSplice	exon	155676548	155676746	.	-	.	gene_id "ENSG00000163374"; transcript_id "hsCircRNA-68"; exon_number "2" gene_name "YY1AP1"; gene_biotype "protein_coding"; oId "lv:circYY1AP1-347-002|ce:circYY1AP1-1457-001|ts:circYY1AP1-1304-003"; tissue "lv|ce|ts";
1	ncSplice	exon	155679409	155679512	.	-	.	gene_id "ENSG00000163374"; transcript_id "hsCircRNA-68"; exon_number "3" gene_name "YY1AP1"; gene_biotype "protein_coding"; oId "lv:circYY1AP1-347-002|ce:circYY1AP1-1457-001|ts:circYY1AP1-1304-003"; tissue "lv|ce|ts";
1	ncSplice	gene	155676548	155679512	.	-	.	gene_id "ENSG00000163374"; gene_name "YY1AP1"; gene_source "ncSplice"; gene_biotype "protein_coding";
1	ncSplice	transcript	155676548	155679512	.	-	.	gene_id "ENSG00000163374"; transcript_id "hsCircRNA-69"; gene_name "YY1AP1"; gene_biotype "protein_coding"; transcript_biotype "circRNA"; oId "lv:circYY1AP1-348-002|ts:circYY1AP1-1305-003"; tissue "lv|ts";
1	ncSplice	exon	155676548	155676746	.	-	.	gene_id "ENSG00000163374"; transcript_id "hsCircRNA-69"; exon_number "1" gene_name "YY1AP1"; gene_biotype "protein_coding"; oId "lv:circYY1AP1-348-002|ts:circYY1AP1-1305-003"; tissue "lv|ts";
1	ncSplice	exon	155679409	155679512	.	-	.	gene_id "ENSG00000163374"; transcript_id "hsCircRNA-69"; exon_number "2" gene_name "YY1AP1"; gene_biotype "protein_coding"; oId "lv:circYY1AP1-348-002|ts:circYY1AP1-1305-003"; tissue "lv|ts";
11	ncSplice	gene	57491224	57491862	.	-	.	gene_id "ENSG00000149150"; gene_name "SLC43A1"; gene_source "ncSplice"; gene_biotype "protein_coding";
11	ncSplice	transcript	57491224	57491862	.	-	.	gene_id "ENSG00000149150"; transcript_id "hsCircRNA-70"; gene_name "SLC43A1"; gene_biotype "protein_coding"; transcript_biotype "circRNA"; oId "lv:circSLC43A1-368-001"; tissue "lv";
11	ncSplice	exon	57491224	57491362	.	-	.	gene_id "ENSG00000149150"; transcript_id "hsCircRNA-70"; exon_number "1" gene_name "SLC43A1"; gene_biotype "protein_coding"; oId "lv:circSLC43A1-368-001"; tissue "lv";
11	ncSplice	exon	57491591	57491626	.	-	.	gene_id "ENSG00000149150"; transcript_id "hsCircRNA-70"; exon_number "2" gene_name "SLC43A1"; gene_biotype "protein_coding"; oId "lv:circSLC43A1-368-001"; tissue "lv";
11	ncSplice	exon	57491716	57491862	.	-	.	gene_id "ENSG00000149150"; transcript_id "hsCircRNA-70"; exon_number "3" gene_name "SLC43A1"; gene_biotype "protein_coding"; oId "lv:circSLC43A1-368-001"; tissue "lv";
11	ncSplice	gene	581492	587464	.	+	.	gene_id "ENSG00000070047"; gene_name "PHRF1"; gene_source "ncSplice"; gene_biotype "protein_coding";
11	ncSplice	transcript	581492	587464	.	+	.	gene_id "ENSG00000070047"; transcript_id "hsCircRNA-71"; gene_name "PHRF1"; gene_biotype "protein_coding"; transcript_biotype "circRNA"; oId "lv:circPHRF1-370-001"; tissue "lv";
11	ncSplice	exon	581492	581606	.	+	.	gene_id "ENSG00000070047"; transcript_id "hsCircRNA-71"; exon_number "1" gene_name "PHRF1"; gene_biotype "protein_coding"; oId "lv:circPHRF1-370-001"; tissue "lv";
11	ncSplice	exon	581962	582081	.	+	.	gene_id "ENSG00000070047"; transcript_id "hsCircRNA-71"; exon_number "2" gene_name "PHRF1"; gene_biotype "protein_coding"; oId "lv:circPHRF1-370-001"; tissue "lv";
11	ncSplice	exon	587259	587464	.	+	.	gene_id "ENSG00000070047"; transcript_id "hsCircRNA-71"; exon_number "3" gene_name "PHRF1"; gene_biotype "protein_coding"; oId "lv:circPHRF1-370-001"; tissue "lv";
11	ncSplice	gene	59658866	59659469	.	-	.	gene_id "ENSG00000166889"; gene_name "PATL1"; gene_source "ncSplice"; gene_biotype "protein_coding";
11	ncSplice	transcript	59658866	59659469	.	-	.	gene_id "ENSG00000166889"; transcript_id "hsCircRNA-72"; gene_name "PATL1"; gene_biotype "protein_coding"; transcript_biotype "circRNA"; oId "lv:circPATL1-372-001|ce:circPATL1-1507-001|ts:circPATL1-1349-001"; tissue "lv|ce|ts";
11	ncSplice	exon	59658866	59658946	.	-	.	gene_id "ENSG00000166889"; transcript_id "hsCircRNA-72"; exon_number "1" gene_name "PATL1"; gene_biotype "protein_coding"; oId "lv:circPATL1-372-001|ce:circPATL1-1507-001|ts:circPATL1-1349-001"; tissue "lv|ce|ts";
11	ncSplice	exon	59659252	59659469	.	-	.	gene_id "ENSG00000166889"; transcript_id "hsCircRNA-72"; exon_number "2" gene_name "PATL1"; gene_biotype "protein_coding"; oId "lv:circPATL1-372-001|ce:circPATL1-1507-001|ts:circPATL1-1349-001"; tissue "lv|ce|ts";
1	ncSplice	gene	161235847	161236598	.	-	.	gene_id "ENSG00000143257"; gene_name "NR1I3"; gene_source "ncSplice"; gene_biotype "protein_coding";
1	ncSplice	transcript	161235847	161236598	.	-	.	gene_id "ENSG00000143257"; transcript_id "hsCircRNA-73"; gene_name "NR1I3"; gene_biotype "protein_coding"; transcript_biotype "circRNA"; oId "lv:circNR1I3-373-001"; tissue "lv";
1	ncSplice	exon	161235847	161235977	.	-	.	gene_id "ENSG00000143257"; transcript_id "hsCircRNA-73"; exon_number "1" gene_name "NR1I3"; gene_biotype "protein_coding"; oId "lv:circNR1I3-373-001"; tissue "lv";
1	ncSplice	exon	161236459	161236598	.	-	.	gene_id "ENSG00000143257"; transcript_id "hsCircRNA-73"; exon_number "2" gene_name "NR1I3"; gene_biotype "protein_coding"; oId "lv:circNR1I3-373-001"; tissue "lv";
11	ncSplice	gene	61437625	61438113	.	+	.	gene_id "ENSG00000167985"; gene_name "SDHAF2"; gene_source "ncSplice"; gene_biotype "protein_coding";
11	ncSplice	transcript	61437625	61438113	.	+	.	gene_id "ENSG00000167985"; transcript_id "hsCircRNA-74"; gene_name "SDHAF2"; gene_biotype "protein_coding"; transcript_biotype "circRNA"; oId "lv:circSDHAF2-376-001|ts:circSDHAF2-1361-001"; tissue "lv|ts";
11	ncSplice	exon	61437625	61437848	.	+	.	gene_id "ENSG00000167985"; transcript_id "hsCircRNA-74"; exon_number "1" gene_name "SDHAF2"; gene_biotype "protein_coding"; oId "lv:circSDHAF2-376-001|ts:circSDHAF2-1361-001"; tissue "lv|ts";
11	ncSplice	exon	61438004	61438113	.	+	.	gene_id "ENSG00000167985"; transcript_id "hsCircRNA-74"; exon_number "2" gene_name "SDHAF2"; gene_biotype "protein_coding"; oId "lv:circSDHAF2-376-001|ts:circSDHAF2-1361-001"; tissue "lv|ts";
1	ncSplice	gene	166862203	166863921	.	-	.	gene_id "ENSG00000152382"; gene_name "TADA1"; gene_source "ncSplice"; gene_biotype "protein_coding";
1	ncSplice	transcript	166862203	166863921	.	-	.	gene_id "ENSG00000152382"; transcript_id "hsCircRNA-75"; gene_name "TADA1"; gene_biotype "protein_coding"; transcript_biotype "circRNA"; oId "lv:circTADA1-389-001"; tissue "lv";
1	ncSplice	exon	166862203	166862412	.	-	.	gene_id "ENSG00000152382"; transcript_id "hsCircRNA-75"; exon_number "1" gene_name "TADA1"; gene_biotype "protein_coding"; oId "lv:circTADA1-389-001"; tissue "lv";
1	ncSplice	exon	166863824	166863921	.	-	.	gene_id "ENSG00000152382"; transcript_id "hsCircRNA-75"; exon_number "2" gene_name "TADA1"; gene_biotype "protein_coding"; oId "lv:circTADA1-389-001"; tissue "lv";
1	ncSplice	gene	167951800	167975015	.	+	.	gene_id "ENSG00000143164"; gene_name "DCAF6"; gene_source "ncSplice"; gene_biotype "protein_coding";
1	ncSplice	transcript	167951800	167975015	.	+	.	gene_id "ENSG00000143164"; transcript_id "hsCircRNA-76"; gene_name "DCAF6"; gene_biotype "protein_coding"; transcript_biotype "circRNA"; oId "lv:circDCAF6-393-001|ts:circDCAF6-1428-006"; tissue "lv|ts";
1	ncSplice	exon	167951800	167951861	.	+	.	gene_id "ENSG00000143164"; transcript_id "hsCircRNA-76"; exon_number "1" gene_name "DCAF6"; gene_biotype "protein_coding"; oId "lv:circDCAF6-393-001|ts:circDCAF6-1428-006"; tissue "lv|ts";
1	ncSplice	exon	167966629	167966721	.	+	.	gene_id "ENSG00000143164"; transcript_id "hsCircRNA-76"; exon_number "2" gene_name "DCAF6"; gene_biotype "protein_coding"; oId "lv:circDCAF6-393-001|ts:circDCAF6-1428-006"; tissue "lv|ts";
1	ncSplice	exon	167974830	167975015	.	+	.	gene_id "ENSG00000143164"; transcript_id "hsCircRNA-76"; exon_number "3" gene_name "DCAF6"; gene_biotype "protein_coding"; oId "lv:circDCAF6-393-001|ts:circDCAF6-1428-006"; tissue "lv|ts";
1	ncSplice	gene	167966629	167975015	.	+	.	gene_id "ENSG00000143164"; gene_name "DCAF6"; gene_source "ncSplice"; gene_biotype "protein_coding";
1	ncSplice	transcript	167966629	167975015	.	+	.	gene_id "ENSG00000143164"; transcript_id "hsCircRNA-77"; gene_name "DCAF6"; gene_biotype "protein_coding"; transcript_biotype "circRNA"; oId "lv:circDCAF6-394-001|ts:circDCAF6-1431-002"; tissue "lv|ts";
1	ncSplice	exon	167966629	167966721	.	+	.	gene_id "ENSG00000143164"; transcript_id "hsCircRNA-77"; exon_number "1" gene_name "DCAF6"; gene_biotype "protein_coding"; oId "lv:circDCAF6-394-001|ts:circDCAF6-1431-002"; tissue "lv|ts";
1	ncSplice	exon	167974830	167975015	.	+	.	gene_id "ENSG00000143164"; transcript_id "hsCircRNA-77"; exon_number "2" gene_name "DCAF6"; gene_biotype "protein_coding"; oId "lv:circDCAF6-394-001|ts:circDCAF6-1431-002"; tissue "lv|ts";
11	ncSplice	gene	70354301	70356254	.	+	.	gene_id "ENSG00000131626"; gene_name "PPFIA1"; gene_source "ncSplice"; gene_biotype "protein_coding";
11	ncSplice	transcript	70354301	70356254	.	+	.	gene_id "ENSG00000131626"; transcript_id "hsCircRNA-78"; gene_name "PPFIA1"; gene_biotype "protein_coding"; transcript_biotype "circRNA"; oId "lv:circPPFIA1-408-001|ts:circPPFIA1-1488-001"; tissue "lv|ts";
11	ncSplice	exon	70354301	70354452	.	+	.	gene_id "ENSG00000131626"; transcript_id "hsCircRNA-78"; exon_number "1" gene_name "PPFIA1"; gene_biotype "protein_coding"; oId "lv:circPPFIA1-408-001|ts:circPPFIA1-1488-001"; tissue "lv|ts";
11	ncSplice	exon	70355639	70355811	.	+	.	gene_id "ENSG00000131626"; transcript_id "hsCircRNA-78"; exon_number "2" gene_name "PPFIA1"; gene_biotype "protein_coding"; oId "lv:circPPFIA1-408-001|ts:circPPFIA1-1488-001"; tissue "lv|ts";
11	ncSplice	exon	70356161	70356254	.	+	.	gene_id "ENSG00000131626"; transcript_id "hsCircRNA-78"; exon_number "3" gene_name "PPFIA1"; gene_biotype "protein_coding"; oId "lv:circPPFIA1-408-001|ts:circPPFIA1-1488-001"; tissue "lv|ts";
11	ncSplice	gene	72984088	72989097	.	-	.	gene_id "ENSG00000137478"; gene_name "FCHSD2"; gene_source "ncSplice"; gene_biotype "protein_coding";
11	ncSplice	transcript	72984088	72989097	.	-	.	gene_id "ENSG00000137478"; transcript_id "hsCircRNA-79"; gene_name "FCHSD2"; gene_biotype "protein_coding"; transcript_biotype "circRNA"; oId "lv:circFCHSD2-419-001|ce:circFCHSD2-1624-001|ts:circFCHSD2-1529-001"; tissue "lv|ce|ts";
11	ncSplice	exon	72984088	72984216	.	-	.	gene_id "ENSG00000137478"; transcript_id "hsCircRNA-79"; exon_number "1" gene_name "FCHSD2"; gene_biotype "protein_coding"; oId "lv:circFCHSD2-419-001|ce:circFCHSD2-1624-001|ts:circFCHSD2-1529-001"; tissue "lv|ce|ts";
11	ncSplice	exon	72985062	72985116	.	-	.	gene_id "ENSG00000137478"; transcript_id "hsCircRNA-79"; exon_number "2" gene_name "FCHSD2"; gene_biotype "protein_coding"; oId "lv:circFCHSD2-419-001|ce:circFCHSD2-1624-001|ts:circFCHSD2-1529-001"; tissue "lv|ce|ts";
11	ncSplice	exon	72988964	72989097	.	-	.	gene_id "ENSG00000137478"; transcript_id "hsCircRNA-79"; exon_number "3" gene_name "FCHSD2"; gene_biotype "protein_coding"; oId "lv:circFCHSD2-419-001|ce:circFCHSD2-1624-001|ts:circFCHSD2-1529-001"; tissue "lv|ce|ts";
11	ncSplice	gene	73707420	73718718	.	-	.	gene_id "ENSG00000175582"; gene_name "RAB6A"; gene_source "ncSplice"; gene_biotype "protein_coding";
11	ncSplice	transcript	73707420	73718718	.	-	.	gene_id "ENSG00000175582"; transcript_id "hsCircRNA-80"; gene_name "RAB6A"; gene_biotype "protein_coding"; transcript_biotype "circRNA"; oId "lv:circRAB6A-420-001|ce:circRAB6A-1629-001|ts:circRAB6A-1544-002"; tissue "lv|ce|ts";
11	ncSplice	exon	73707420	73707513	.	-	.	gene_id "ENSG00000175582"; transcript_id "hsCircRNA-80"; exon_number "1" gene_name "RAB6A"; gene_biotype "protein_coding"; oId "lv:circRAB6A-420-001|ce:circRAB6A-1629-001|ts:circRAB6A-1544-002"; tissue "lv|ce|ts";
11	ncSplice	exon	73716251	73716362	.	-	.	gene_id "ENSG00000175582"; transcript_id "hsCircRNA-80"; exon_number "2" gene_name "RAB6A"; gene_biotype "protein_coding"; oId "lv:circRAB6A-420-001|ce:circRAB6A-1629-001|ts:circRAB6A-1544-002"; tissue "lv|ce|ts";
11	ncSplice	exon	73718613	73718718	.	-	.	gene_id "ENSG00000175582"; transcript_id "hsCircRNA-80"; exon_number "3" gene_name "RAB6A"; gene_biotype "protein_coding"; oId "lv:circRAB6A-420-001|ce:circRAB6A-1629-001|ts:circRAB6A-1544-002"; tissue "lv|ce|ts";
11	ncSplice	gene	74789626	74817714	.	+	.	gene_id "ENSG00000166439"; gene_name "RNF169"; gene_source "ncSplice"; gene_biotype "protein_coding";
11	ncSplice	transcript	74789626	74817714	.	+	.	gene_id "ENSG00000166439"; transcript_id "hsCircRNA-81"; gene_name "RNF169"; gene_biotype "protein_coding"; transcript_biotype "circRNA"; oId "lv:circRNF169-425-001|ce:circRNF169-1666-001|ts:circRNF169-1575-001"; tissue "lv|ce|ts";
11	ncSplice	exon	74789626	74789699	.	+	.	gene_id "ENSG00000166439"; transcript_id "hsCircRNA-81"; exon_number "1" gene_name "RNF169"; gene_biotype "protein_coding"; oId "lv:circRNF169-425-001|ce:circRNF169-1666-001|ts:circRNF169-1575-001"; tissue "lv|ce|ts";
11	ncSplice	exon	74810184	74810330	.	+	.	gene_id "ENSG00000166439"; transcript_id "hsCircRNA-81"; exon_number "2" gene_name "RNF169"; gene_biotype "protein_coding"; oId "lv:circRNF169-425-001|ce:circRNF169-1666-001|ts:circRNF169-1575-001"; tissue "lv|ce|ts";
11	ncSplice	exon	74817596	74817714	.	+	.	gene_id "ENSG00000166439"; transcript_id "hsCircRNA-81"; exon_number "3" gene_name "RNF169"; gene_biotype "protein_coding"; oId "lv:circRNF169-425-001|ce:circRNF169-1666-001|ts:circRNF169-1575-001"; tissue "lv|ce|ts";
1	ncSplice	gene	17580553	17588479	.	+	.	gene_id "ENSG00000074964"; gene_name "ARHGEF10L"; gene_source "ncSplice"; gene_biotype "protein_coding";
1	ncSplice	transcript	17580553	17588479	.	+	.	gene_id "ENSG00000074964"; transcript_id "hsCircRNA-82"; gene_name "ARHGEF10L"; gene_biotype "protein_coding"; transcript_biotype "circRNA"; oId "lv:circARHGEF10L-427-001|ce:circARHGEF10L-1676-001"; tissue "lv|ce";
1	ncSplice	exon	17580553	17580632	.	+	.	gene_id "ENSG00000074964"; transcript_id "hsCircRNA-82"; exon_number "1" gene_name "ARHGEF10L"; gene_biotype "protein_coding"; oId "lv:circARHGEF10L-427-001|ce:circARHGEF10L-1676-001"; tissue "lv|ce";
1	ncSplice	exon	17587460	17587645	.	+	.	gene_id "ENSG00000074964"; transcript_id "hsCircRNA-82"; exon_number "2" gene_name "ARHGEF10L"; gene_biotype "protein_coding"; oId "lv:circARHGEF10L-427-001|ce:circARHGEF10L-1676-001"; tissue "lv|ce";
1	ncSplice	exon	17588446	17588479	.	+	.	gene_id "ENSG00000074964"; transcript_id "hsCircRNA-82"; exon_number "3" gene_name "ARHGEF10L"; gene_biotype "protein_coding"; oId "lv:circARHGEF10L-427-001|ce:circARHGEF10L-1676-001"; tissue "lv|ce";
11	ncSplice	gene	77619606	77625818	.	-	.	gene_id "ENSG00000074201"; gene_name "CLNS1A"; gene_source "ncSplice"; gene_biotype "protein_coding";
11	ncSplice	transcript	77619606	77625818	.	-	.	gene_id "ENSG00000074201"; transcript_id "hsCircRNA-83"; gene_name "CLNS1A"; gene_biotype "protein_coding"; transcript_biotype "circRNA"; oId "lv:circCLNS1A-439-001|ce:circCLNS1A-1720-003|ts:circCLNS1A-1630-001"; tissue "lv|ce|ts";
11	ncSplice	exon	77619606	77619695	.	-	.	gene_id "ENSG00000074201"; transcript_id "hsCircRNA-83"; exon_number "1" gene_name "CLNS1A"; gene_biotype "protein_coding"; oId "lv:circCLNS1A-439-001|ce:circCLNS1A-1720-003|ts:circCLNS1A-1630-001"; tissue "lv|ce|ts";
11	ncSplice	exon	77622500	77622673	.	-	.	gene_id "ENSG00000074201"; transcript_id "hsCircRNA-83"; exon_number "2" gene_name "CLNS1A"; gene_biotype "protein_coding"; oId "lv:circCLNS1A-439-001|ce:circCLNS1A-1720-003|ts:circCLNS1A-1630-001"; tissue "lv|ce|ts";
11	ncSplice	exon	77624963	77625070	.	-	.	gene_id "ENSG00000074201"; transcript_id "hsCircRNA-83"; exon_number "3" gene_name "CLNS1A"; gene_biotype "protein_coding"; oId "lv:circCLNS1A-439-001|ce:circCLNS1A-1720-003|ts:circCLNS1A-1630-001"; tissue "lv|ce|ts";
11	ncSplice	exon	77625717	77625818	.	-	.	gene_id "ENSG00000074201"; transcript_id "hsCircRNA-83"; exon_number "4" gene_name "CLNS1A"; gene_biotype "protein_coding"; oId "lv:circCLNS1A-439-001|ce:circCLNS1A-1720-003|ts:circCLNS1A-1630-001"; tissue "lv|ce|ts";
1	ncSplice	gene	180003174	180006567	.	+	.	gene_id "ENSG00000135837"; gene_name "CEP350"; gene_source "ncSplice"; gene_biotype "protein_coding";
1	ncSplice	transcript	180003174	180006567	.	+	.	gene_id "ENSG00000135837"; transcript_id "hsCircRNA-84"; gene_name "CEP350"; gene_biotype "protein_coding"; transcript_biotype "circRNA"; oId "lv:circCEP350-448-001|ce:circCEP350-1764-001|ts:circCEP350-1700-001"; tissue "lv|ce|ts";
1	ncSplice	exon	180003174	180003287	.	+	.	gene_id "ENSG00000135837"; transcript_id "hsCircRNA-84"; exon_number "1" gene_name "CEP350"; gene_biotype "protein_coding"; oId "lv:circCEP350-448-001|ce:circCEP350-1764-001|ts:circCEP350-1700-001"; tissue "lv|ce|ts";
1	ncSplice	exon	180006454	180006567	.	+	.	gene_id "ENSG00000135837"; transcript_id "hsCircRNA-84"; exon_number "2" gene_name "CEP350"; gene_biotype "protein_coding"; oId "lv:circCEP350-448-001|ce:circCEP350-1764-001|ts:circCEP350-1700-001"; tissue "lv|ce|ts";
1	ncSplice	gene	1804419	1817875	.	-	.	gene_id "ENSG00000078369"; gene_name "GNB1"; gene_source "ncSplice"; gene_biotype "protein_coding";
1	ncSplice	transcript	1804419	1817875	.	-	.	gene_id "ENSG00000078369"; transcript_id "hsCircRNA-85"; gene_name "GNB1"; gene_biotype "protein_coding"; transcript_biotype "circRNA"; oId "lv:circGNB1-451-001"; tissue "lv";
1	ncSplice	exon	1804419	1804581	.	-	.	gene_id "ENSG00000078369"; transcript_id "hsCircRNA-85"; exon_number "1" gene_name "GNB1"; gene_biotype "protein_coding"; oId "lv:circGNB1-451-001"; tissue "lv";
1	ncSplice	exon	1806475	1806538	.	-	.	gene_id "ENSG00000078369"; transcript_id "hsCircRNA-85"; exon_number "2" gene_name "GNB1"; gene_biotype "protein_coding"; oId "lv:circGNB1-451-001"; tissue "lv";
1	ncSplice	exon	1815756	1815862	.	-	.	gene_id "ENSG00000078369"; transcript_id "hsCircRNA-85"; exon_number "3" gene_name "GNB1"; gene_biotype "protein_coding"; oId "lv:circGNB1-451-001"; tissue "lv";
1	ncSplice	exon	1817837	1817875	.	-	.	gene_id "ENSG00000078369"; transcript_id "hsCircRNA-85"; exon_number "4" gene_name "GNB1"; gene_biotype "protein_coding"; oId "lv:circGNB1-451-001"; tissue "lv";
1	ncSplice	gene	180984677	180993425	.	-	.	gene_id "ENSG00000135823"; gene_name "STX6"; gene_source "ncSplice"; gene_biotype "protein_coding";
1	ncSplice	transcript	180984677	180993425	.	-	.	gene_id "ENSG00000135823"; transcript_id "hsCircRNA-86"; gene_name "STX6"; gene_biotype "protein_coding"; transcript_biotype "circRNA"; oId "lv:circSTX6-452-001|ce:circSTX6-1781-002"; tissue "lv|ce";
1	ncSplice	exon	180984677	180984771	.	-	.	gene_id "ENSG00000135823"; transcript_id "hsCircRNA-86"; exon_number "1" gene_name "STX6"; gene_biotype "protein_coding"; oId "lv:circSTX6-452-001|ce:circSTX6-1781-002"; tissue "lv|ce";
1	ncSplice	exon	180988239	180988345	.	-	.	gene_id "ENSG00000135823"; transcript_id "hsCircRNA-86"; exon_number "2" gene_name "STX6"; gene_biotype "protein_coding"; oId "lv:circSTX6-452-001|ce:circSTX6-1781-002"; tissue "lv|ce";
1	ncSplice	exon	180989984	180990109	.	-	.	gene_id "ENSG00000135823"; transcript_id "hsCircRNA-86"; exon_number "3" gene_name "STX6"; gene_biotype "protein_coding"; oId "lv:circSTX6-452-001|ce:circSTX6-1781-002"; tissue "lv|ce";
1	ncSplice	exon	180993363	180993425	.	-	.	gene_id "ENSG00000135823"; transcript_id "hsCircRNA-86"; exon_number "4" gene_name "STX6"; gene_biotype "protein_coding"; oId "lv:circSTX6-452-001|ce:circSTX6-1781-002"; tissue "lv|ce";
1	ncSplice	gene	180984677	181005463	.	-	.	gene_id "ENSG00000135823"; gene_name "STX6"; gene_source "ncSplice"; gene_biotype "protein_coding";
1	ncSplice	transcript	180984677	181005463	.	-	.	gene_id "ENSG00000135823"; transcript_id "hsCircRNA-87"; gene_name "STX6"; gene_biotype "protein_coding"; transcript_biotype "circRNA"; oId "lv:circSTX6-453-001|ce:circSTX6-1782-007"; tissue "lv|ce";
1	ncSplice	exon	180984677	180984771	.	-	.	gene_id "ENSG00000135823"; transcript_id "hsCircRNA-87"; exon_number "1" gene_name "STX6"; gene_biotype "protein_coding"; oId "lv:circSTX6-453-001|ce:circSTX6-1782-007"; tissue "lv|ce";
1	ncSplice	exon	180988239	180988345	.	-	.	gene_id "ENSG00000135823"; transcript_id "hsCircRNA-87"; exon_number "2" gene_name "STX6"; gene_biotype "protein_coding"; oId "lv:circSTX6-453-001|ce:circSTX6-1782-007"; tissue "lv|ce";
1	ncSplice	exon	180989984	180990109	.	-	.	gene_id "ENSG00000135823"; transcript_id "hsCircRNA-87"; exon_number "3" gene_name "STX6"; gene_biotype "protein_coding"; oId "lv:circSTX6-453-001|ce:circSTX6-1782-007"; tissue "lv|ce";
1	ncSplice	exon	180993363	180993425	.	-	.	gene_id "ENSG00000135823"; transcript_id "hsCircRNA-87"; exon_number "4" gene_name "STX6"; gene_biotype "protein_coding"; oId "lv:circSTX6-453-001|ce:circSTX6-1782-007"; tissue "lv|ce";
1	ncSplice	exon	181002606	181002700	.	-	.	gene_id "ENSG00000135823"; transcript_id "hsCircRNA-87"; exon_number "5" gene_name "STX6"; gene_biotype "protein_coding"; oId "lv:circSTX6-453-001|ce:circSTX6-1782-007"; tissue "lv|ce";
1	ncSplice	exon	181005294	181005463	.	-	.	gene_id "ENSG00000135823"; transcript_id "hsCircRNA-87"; exon_number "6" gene_name "STX6"; gene_biotype "protein_coding"; oId "lv:circSTX6-453-001|ce:circSTX6-1782-007"; tissue "lv|ce";
11	ncSplice	gene	85974708	85983973	.	-	.	gene_id "ENSG00000073921"; gene_name "PICALM"; gene_source "ncSplice"; gene_biotype "protein_coding";
11	ncSplice	transcript	85974708	85983973	.	-	.	gene_id "ENSG00000073921"; transcript_id "hsCircRNA-88"; gene_name "PICALM"; gene_biotype "protein_coding"; transcript_biotype "circRNA"; oId "lv:circPICALM-457-003"; tissue "lv";
11	ncSplice	exon	85974708	85974812	.	-	.	gene_id "ENSG00000073921"; transcript_id "hsCircRNA-88"; exon_number "1" gene_name "PICALM"; gene_biotype "protein_coding"; oId "lv:circPICALM-457-003"; tissue "lv";
11	ncSplice	exon	85976623	85976682	.	-	.	gene_id "ENSG00000073921"; transcript_id "hsCircRNA-88"; exon_number "2" gene_name "PICALM"; gene_biotype "protein_coding"; oId "lv:circPICALM-457-003"; tissue "lv";
11	ncSplice	exon	85981129	85981228	.	-	.	gene_id "ENSG00000073921"; transcript_id "hsCircRNA-88"; exon_number "3" gene_name "PICALM"; gene_biotype "protein_coding"; oId "lv:circPICALM-457-003"; tissue "lv";
11	ncSplice	exon	85981745	85981775	.	-	.	gene_id "ENSG00000073921"; transcript_id "hsCircRNA-88"; exon_number "4" gene_name "PICALM"; gene_biotype "protein_coding"; oId "lv:circPICALM-457-003"; tissue "lv";
11	ncSplice	exon	85981872	85981988	.	-	.	gene_id "ENSG00000073921"; transcript_id "hsCircRNA-88"; exon_number "5" gene_name "PICALM"; gene_biotype "protein_coding"; oId "lv:circPICALM-457-003"; tissue "lv";
11	ncSplice	exon	85983866	85983973	.	-	.	gene_id "ENSG00000073921"; transcript_id "hsCircRNA-88"; exon_number "6" gene_name "PICALM"; gene_biotype "protein_coding"; oId "lv:circPICALM-457-003"; tissue "lv";
11	ncSplice	gene	85996826	86031611	.	-	.	gene_id "ENSG00000073921"; gene_name "PICALM"; gene_source "ncSplice"; gene_biotype "protein_coding";
11	ncSplice	transcript	85996826	86031611	.	-	.	gene_id "ENSG00000073921"; transcript_id "hsCircRNA-89"; gene_name "PICALM"; gene_biotype "protein_coding"; transcript_biotype "circRNA"; oId "lv:circPICALM-462-002|ce:circPICALM-1831-016"; tissue "lv|ce";
11	ncSplice	exon	85996826	85996929	.	-	.	gene_id "ENSG00000073921"; transcript_id "hsCircRNA-89"; exon_number "1" gene_name "PICALM"; gene_biotype "protein_coding"; oId "lv:circPICALM-462-002|ce:circPICALM-1831-016"; tissue "lv|ce";
11	ncSplice	exon	86000643	86000779	.	-	.	gene_id "ENSG00000073921"; transcript_id "hsCircRNA-89"; exon_number "2" gene_name "PICALM"; gene_biotype "protein_coding"; oId "lv:circPICALM-462-002|ce:circPICALM-1831-016"; tissue "lv|ce";
11	ncSplice	exon	86001035	86001158	.	-	.	gene_id "ENSG00000073921"; transcript_id "hsCircRNA-89"; exon_number "3" gene_name "PICALM"; gene_biotype "protein_coding"; oId "lv:circPICALM-462-002|ce:circPICALM-1831-016"; tissue "lv|ce";
11	ncSplice	exon	86003366	86003451	.	-	.	gene_id "ENSG00000073921"; transcript_id "hsCircRNA-89"; exon_number "4" gene_name "PICALM"; gene_biotype "protein_coding"; oId "lv:circPICALM-462-002|ce:circPICALM-1831-016"; tissue "lv|ce";
11	ncSplice	exon	86007542	86007583	.	-	.	gene_id "ENSG00000073921"; transcript_id "hsCircRNA-89"; exon_number "5" gene_name "PICALM"; gene_biotype "protein_coding"; oId "lv:circPICALM-462-002|ce:circPICALM-1831-016"; tissue "lv|ce";
11	ncSplice	exon	86011030	86011136	.	-	.	gene_id "ENSG00000073921"; transcript_id "hsCircRNA-89"; exon_number "6" gene_name "PICALM"; gene_biotype "protein_coding"; oId "lv:circPICALM-462-002|ce:circPICALM-1831-016"; tissue "lv|ce";
11	ncSplice	exon	86012281	86012392	.	-	.	gene_id "ENSG00000073921"; transcript_id "hsCircRNA-89"; exon_number "7" gene_name "PICALM"; gene_biotype "protein_coding"; oId "lv:circPICALM-462-002|ce:circPICALM-1831-016"; tissue "lv|ce";
11	ncSplice	exon	86014870	86014963	.	-	.	gene_id "ENSG00000073921"; transcript_id "hsCircRNA-89"; exon_number "8" gene_name "PICALM"; gene_biotype "protein_coding"; oId "lv:circPICALM-462-002|ce:circPICALM-1831-016"; tissue "lv|ce";
11	ncSplice	exon	86022367	86022469	.	-	.	gene_id "ENSG00000073921"; transcript_id "hsCircRNA-89"; exon_number "9" gene_name "PICALM"; gene_biotype "protein_coding"; oId "lv:circPICALM-462-002|ce:circPICALM-1831-016"; tissue "lv|ce";
11	ncSplice	exon	86026292	86026367	.	-	.	gene_id "ENSG00000073921"; transcript_id "hsCircRNA-89"; exon_number "10" gene_name "PICALM"; gene_biotype "protein_coding"; oId "lv:circPICALM-462-002|ce:circPICALM-1831-016"; tissue "lv|ce";
11	ncSplice	exon	86031469	86031611	.	-	.	gene_id "ENSG00000073921"; transcript_id "hsCircRNA-89"; exon_number "11" gene_name "PICALM"; gene_biotype "protein_coding"; oId "lv:circPICALM-462-002|ce:circPICALM-1831-016"; tissue "lv|ce";
11	ncSplice	gene	86011030	86031611	.	-	.	gene_id "ENSG00000073921"; gene_name "PICALM"; gene_source "ncSplice"; gene_biotype "protein_coding";
11	ncSplice	transcript	86011030	86031611	.	-	.	gene_id "ENSG00000073921"; transcript_id "hsCircRNA-90"; gene_name "PICALM"; gene_biotype "protein_coding"; transcript_biotype "circRNA"; oId "lv:circPICALM-463-002|ce:circPICALM-1834-006"; tissue "lv|ce";
11	ncSplice	exon	86011030	86011136	.	-	.	gene_id "ENSG00000073921"; transcript_id "hsCircRNA-90"; exon_number "1" gene_name "PICALM"; gene_biotype "protein_coding"; oId "lv:circPICALM-463-002|ce:circPICALM-1834-006"; tissue "lv|ce";
11	ncSplice	exon	86012281	86012392	.	-	.	gene_id "ENSG00000073921"; transcript_id "hsCircRNA-90"; exon_number "2" gene_name "PICALM"; gene_biotype "protein_coding"; oId "lv:circPICALM-463-002|ce:circPICALM-1834-006"; tissue "lv|ce";
11	ncSplice	exon	86014870	86014963	.	-	.	gene_id "ENSG00000073921"; transcript_id "hsCircRNA-90"; exon_number "3" gene_name "PICALM"; gene_biotype "protein_coding"; oId "lv:circPICALM-463-002|ce:circPICALM-1834-006"; tissue "lv|ce";
11	ncSplice	exon	86022367	86022469	.	-	.	gene_id "ENSG00000073921"; transcript_id "hsCircRNA-90"; exon_number "4" gene_name "PICALM"; gene_biotype "protein_coding"; oId "lv:circPICALM-463-002|ce:circPICALM-1834-006"; tissue "lv|ce";
11	ncSplice	exon	86026292	86026367	.	-	.	gene_id "ENSG00000073921"; transcript_id "hsCircRNA-90"; exon_number "5" gene_name "PICALM"; gene_biotype "protein_coding"; oId "lv:circPICALM-463-002|ce:circPICALM-1834-006"; tissue "lv|ce";
11	ncSplice	exon	86031469	86031611	.	-	.	gene_id "ENSG00000073921"; transcript_id "hsCircRNA-90"; exon_number "6" gene_name "PICALM"; gene_biotype "protein_coding"; oId "lv:circPICALM-463-002|ce:circPICALM-1834-006"; tissue "lv|ce";
11	ncSplice	gene	86022367	86031611	.	-	.	gene_id "ENSG00000073921"; gene_name "PICALM"; gene_source "ncSplice"; gene_biotype "protein_coding";
11	ncSplice	transcript	86022367	86031611	.	-	.	gene_id "ENSG00000073921"; transcript_id "hsCircRNA-91"; gene_name "PICALM"; gene_biotype "protein_coding"; transcript_biotype "circRNA"; oId "lv:circPICALM-464-002|ce:circPICALM-1837-006"; tissue "lv|ce";
11	ncSplice	exon	86022367	86022469	.	-	.	gene_id "ENSG00000073921"; transcript_id "hsCircRNA-91"; exon_number "1" gene_name "PICALM"; gene_biotype "protein_coding"; oId "lv:circPICALM-464-002|ce:circPICALM-1837-006"; tissue "lv|ce";
11	ncSplice	exon	86026292	86026367	.	-	.	gene_id "ENSG00000073921"; transcript_id "hsCircRNA-91"; exon_number "2" gene_name "PICALM"; gene_biotype "protein_coding"; oId "lv:circPICALM-464-002|ce:circPICALM-1837-006"; tissue "lv|ce";
11	ncSplice	exon	86031469	86031611	.	-	.	gene_id "ENSG00000073921"; transcript_id "hsCircRNA-91"; exon_number "3" gene_name "PICALM"; gene_biotype "protein_coding"; oId "lv:circPICALM-464-002|ce:circPICALM-1837-006"; tissue "lv|ce";
1	ncSplice	gene	204112915	204114605	.	+	.	gene_id "ENSG00000143842"; gene_name "SOX13"; gene_source "ncSplice"; gene_biotype "protein_coding";
1	ncSplice	transcript	204112915	204114605	.	+	.	gene_id "ENSG00000143842"; transcript_id "hsCircRNA-92"; gene_name "SOX13"; gene_biotype "protein_coding"; transcript_biotype "circRNA"; oId "lv:circSOX13-491-001"; tissue "lv";
1	ncSplice	exon	204112915	204113134	.	+	.	gene_id "ENSG00000143842"; transcript_id "hsCircRNA-92"; exon_number "1" gene_name "SOX13"; gene_biotype "protein_coding"; oId "lv:circSOX13-491-001"; tissue "lv";
1	ncSplice	exon	204114321	204114432	.	+	.	gene_id "ENSG00000143842"; transcript_id "hsCircRNA-92"; exon_number "2" gene_name "SOX13"; gene_biotype "protein_coding"; oId "lv:circSOX13-491-001"; tissue "lv";
1	ncSplice	exon	204114519	204114605	.	+	.	gene_id "ENSG00000143842"; transcript_id "hsCircRNA-92"; exon_number "3" gene_name "SOX13"; gene_biotype "protein_coding"; oId "lv:circSOX13-491-001"; tissue "lv";
1	ncSplice	gene	20757166	20773610	.	-	.	gene_id "ENSG00000127483"; gene_name "HP1BP3"; gene_source "ncSplice"; gene_biotype "protein_coding";
1	ncSplice	transcript	20757166	20773610	.	-	.	gene_id "ENSG00000127483"; transcript_id "hsCircRNA-93"; gene_name "HP1BP3"; gene_biotype "protein_coding"; transcript_biotype "circRNA"; oId "lv:circHP1BP3-495-001|ce:circHP1BP3-1980-003|ts:circHP1BP3-1929-010"; tissue "lv|ce|ts";
1	ncSplice	exon	20757166	20757256	.	-	.	gene_id "ENSG00000127483"; transcript_id "hsCircRNA-93"; exon_number "1" gene_name "HP1BP3"; gene_biotype "protein_coding"; oId "lv:circHP1BP3-495-001|ce:circHP1BP3-1980-003|ts:circHP1BP3-1929-010"; tissue "lv|ce|ts";
1	ncSplice	exon	20765377	20765531	.	-	.	gene_id "ENSG00000127483"; transcript_id "hsCircRNA-93"; exon_number "2" gene_name "HP1BP3"; gene_biotype "protein_coding"; oId "lv:circHP1BP3-495-001|ce:circHP1BP3-1980-003|ts:circHP1BP3-1929-010"; tissue "lv|ce|ts";
1	ncSplice	exon	20767584	20767664	.	-	.	gene_id "ENSG00000127483"; transcript_id "hsCircRNA-93"; exon_number "3" gene_name "HP1BP3"; gene_biotype "protein_coding"; oId "lv:circHP1BP3-495-001|ce:circHP1BP3-1980-003|ts:circHP1BP3-1929-010"; tissue "lv|ce|ts";
1	ncSplice	exon	20770930	20771073	.	-	.	gene_id "ENSG00000127483"; transcript_id "hsCircRNA-93"; exon_number "4" gene_name "HP1BP3"; gene_biotype "protein_coding"; oId "lv:circHP1BP3-495-001|ce:circHP1BP3-1980-003|ts:circHP1BP3-1929-010"; tissue "lv|ce|ts";
1	ncSplice	exon	20773451	20773610	.	-	.	gene_id "ENSG00000127483"; transcript_id "hsCircRNA-93"; exon_number "5" gene_name "HP1BP3"; gene_biotype "protein_coding"; oId "lv:circHP1BP3-495-001|ce:circHP1BP3-1980-003|ts:circHP1BP3-1929-010"; tissue "lv|ce|ts";
1	ncSplice	gene	20770930	20773610	.	-	.	gene_id "ENSG00000127483"; gene_name "HP1BP3"; gene_source "ncSplice"; gene_biotype "protein_coding";
1	ncSplice	transcript	20770930	20773610	.	-	.	gene_id "ENSG00000127483"; transcript_id "hsCircRNA-94"; gene_name "HP1BP3"; gene_biotype "protein_coding"; transcript_biotype "circRNA"; oId "lv:circHP1BP3-498-001|ce:circHP1BP3-1989-002|ts:circHP1BP3-1935-001"; tissue "lv|ce|ts";
1	ncSplice	exon	20770930	20771073	.	-	.	gene_id "ENSG00000127483"; transcript_id "hsCircRNA-94"; exon_number "1" gene_name "HP1BP3"; gene_biotype "protein_coding"; oId "lv:circHP1BP3-498-001|ce:circHP1BP3-1989-002|ts:circHP1BP3-1935-001"; tissue "lv|ce|ts";
1	ncSplice	exon	20773451	20773610	.	-	.	gene_id "ENSG00000127483"; transcript_id "hsCircRNA-94"; exon_number "2" gene_name "HP1BP3"; gene_biotype "protein_coding"; oId "lv:circHP1BP3-498-001|ce:circHP1BP3-1989-002|ts:circHP1BP3-1935-001"; tissue "lv|ce|ts";
1	ncSplice	gene	20969474	20981227	.	-	.	gene_id "ENSG00000075151"; gene_name "EIF4G3"; gene_source "ncSplice"; gene_biotype "protein_coding";
1	ncSplice	transcript	20969474	20981227	.	-	.	gene_id "ENSG00000075151"; transcript_id "hsCircRNA-95"; gene_name "EIF4G3"; gene_biotype "protein_coding"; transcript_biotype "circRNA"; oId "lv:circEIF4G3-500-001|ts:circEIF4G3-1952-001"; tissue "lv|ts";
1	ncSplice	exon	20969474	20969596	.	-	.	gene_id "ENSG00000075151"; transcript_id "hsCircRNA-95"; exon_number "1" gene_name "EIF4G3"; gene_biotype "protein_coding"; oId "lv:circEIF4G3-500-001|ts:circEIF4G3-1952-001"; tissue "lv|ts";
1	ncSplice	exon	20973002	20973099	.	-	.	gene_id "ENSG00000075151"; transcript_id "hsCircRNA-95"; exon_number "2" gene_name "EIF4G3"; gene_biotype "protein_coding"; oId "lv:circEIF4G3-500-001|ts:circEIF4G3-1952-001"; tissue "lv|ts";
1	ncSplice	exon	20980334	20980448	.	-	.	gene_id "ENSG00000075151"; transcript_id "hsCircRNA-95"; exon_number "3" gene_name "EIF4G3"; gene_biotype "protein_coding"; oId "lv:circEIF4G3-500-001|ts:circEIF4G3-1952-001"; tissue "lv|ts";
1	ncSplice	exon	20981048	20981227	.	-	.	gene_id "ENSG00000075151"; transcript_id "hsCircRNA-95"; exon_number "4" gene_name "EIF4G3"; gene_biotype "protein_coding"; oId "lv:circEIF4G3-500-001|ts:circEIF4G3-1952-001"; tissue "lv|ts";
12	ncSplice	gene	100204940	100205757	.	+	.	gene_id "ENSG00000075089"; gene_name "ACTR6"; gene_source "ncSplice"; gene_biotype "protein_coding";
12	ncSplice	transcript	100204940	100205757	.	+	.	gene_id "ENSG00000075089"; transcript_id "hsCircRNA-96"; gene_name "ACTR6"; gene_biotype "protein_coding"; transcript_biotype "circRNA"; oId "lv:circACTR6-502-001"; tissue "lv";
12	ncSplice	exon	100204940	100205057	.	+	.	gene_id "ENSG00000075089"; transcript_id "hsCircRNA-96"; exon_number "1" gene_name "ACTR6"; gene_biotype "protein_coding"; oId "lv:circACTR6-502-001"; tissue "lv";
12	ncSplice	exon	100205676	100205757	.	+	.	gene_id "ENSG00000075089"; transcript_id "hsCircRNA-96"; exon_number "2" gene_name "ACTR6"; gene_biotype "protein_coding"; oId "lv:circACTR6-502-001"; tissue "lv";
12	ncSplice	gene	100282943	100298175	.	+	.	gene_id "ENSG00000136021"; gene_name "SCYL2"; gene_source "ncSplice"; gene_biotype "protein_coding";
12	ncSplice	transcript	100282943	100298175	.	+	.	gene_id "ENSG00000136021"; transcript_id "hsCircRNA-97"; gene_name "SCYL2"; gene_biotype "protein_coding"; transcript_biotype "circRNA"; oId "lv:circSCYL2-504-001|ce:circSCYL2-2018-002"; tissue "lv|ce";
12	ncSplice	exon	100282943	100283147	.	+	.	gene_id "ENSG00000136021"; transcript_id "hsCircRNA-97"; exon_number "1" gene_name "SCYL2"; gene_biotype "protein_coding"; oId "lv:circSCYL2-504-001|ce:circSCYL2-2018-002"; tissue "lv|ce";
12	ncSplice	exon	100291503	100291660	.	+	.	gene_id "ENSG00000136021"; transcript_id "hsCircRNA-97"; exon_number "2" gene_name "SCYL2"; gene_biotype "protein_coding"; oId "lv:circSCYL2-504-001|ce:circSCYL2-2018-002"; tissue "lv|ce";
12	ncSplice	exon	100298031	100298175	.	+	.	gene_id "ENSG00000136021"; transcript_id "hsCircRNA-97"; exon_number "3" gene_name "SCYL2"; gene_biotype "protein_coding"; oId "lv:circSCYL2-504-001|ce:circSCYL2-2018-002"; tissue "lv|ce";
12	ncSplice	gene	100532458	100540818	.	+	.	gene_id "ENSG00000012504"; gene_name "NR1H4"; gene_source "ncSplice"; gene_biotype "protein_coding";
12	ncSplice	transcript	100532458	100540818	.	+	.	gene_id "ENSG00000012504"; transcript_id "hsCircRNA-98"; gene_name "NR1H4"; gene_biotype "protein_coding"; transcript_biotype "circRNA"; oId "lv:circNR1H4-505-002"; tissue "lv";
12	ncSplice	exon	100532458	100532610	.	+	.	gene_id "ENSG00000012504"; transcript_id "hsCircRNA-98"; exon_number "1" gene_name "NR1H4"; gene_biotype "protein_coding"; oId "lv:circNR1H4-505-002"; tissue "lv";
12	ncSplice	exon	100534890	100535023	.	+	.	gene_id "ENSG00000012504"; transcript_id "hsCircRNA-98"; exon_number "2" gene_name "NR1H4"; gene_biotype "protein_coding"; oId "lv:circNR1H4-505-002"; tissue "lv";
12	ncSplice	exon	100536512	100536610	.	+	.	gene_id "ENSG00000012504"; transcript_id "hsCircRNA-98"; exon_number "3" gene_name "NR1H4"; gene_biotype "protein_coding"; oId "lv:circNR1H4-505-002"; tissue "lv";
12	ncSplice	exon	100536948	100537047	.	+	.	gene_id "ENSG00000012504"; transcript_id "hsCircRNA-98"; exon_number "4" gene_name "NR1H4"; gene_biotype "protein_coding"; oId "lv:circNR1H4-505-002"; tissue "lv";
12	ncSplice	exon	100540672	100540818	.	+	.	gene_id "ENSG00000012504"; transcript_id "hsCircRNA-98"; exon_number "5" gene_name "NR1H4"; gene_biotype "protein_coding"; oId "lv:circNR1H4-505-002"; tissue "lv";
12	ncSplice	gene	103733006	103737780	.	+	.	gene_id "ENSG00000136011"; gene_name "STAB2"; gene_source "ncSplice"; gene_biotype "protein_coding";
12	ncSplice	transcript	103733006	103737780	.	+	.	gene_id "ENSG00000136011"; transcript_id "hsCircRNA-99"; gene_name "STAB2"; gene_biotype "protein_coding"; transcript_biotype "circRNA"; oId "lv:circSTAB2-509-001"; tissue "lv";
12	ncSplice	exon	103733006	103733182	.	+	.	gene_id "ENSG00000136011"; transcript_id "hsCircRNA-99"; exon_number "1" gene_name "STAB2"; gene_biotype "protein_coding"; oId "lv:circSTAB2-509-001"; tissue "lv";
12	ncSplice	exon	103735491	103735580	.	+	.	gene_id "ENSG00000136011"; transcript_id "hsCircRNA-99"; exon_number "2" gene_name "STAB2"; gene_biotype "protein_coding"; oId "lv:circSTAB2-509-001"; tissue "lv";
12	ncSplice	exon	103737634	103737780	.	+	.	gene_id "ENSG00000136011"; transcript_id "hsCircRNA-99"; exon_number "3" gene_name "STAB2"; gene_biotype "protein_coding"; oId "lv:circSTAB2-509-001"; tissue "lv";
12	ncSplice	gene	104861291	104928694	.	-	.	gene_id "ENSG00000136052"; gene_name "SLC41A2"; gene_source "ncSplice"; gene_biotype "protein_coding";
12	ncSplice	transcript	104861291	104928694	.	-	.	gene_id "ENSG00000136052"; transcript_id "hsCircRNA-100"; gene_name "SLC41A2"; gene_biotype "protein_coding"; transcript_biotype "circRNA"; oId "lv:circSLC41A2-514-002"; tissue "lv";
12	ncSplice	exon	104861291	104861370	.	-	.	gene_id "ENSG00000136052"; transcript_id "hsCircRNA-100"; exon_number "1" gene_name "SLC41A2"; gene_biotype "protein_coding"; oId "lv:circSLC41A2-514-002"; tissue "lv";
12	ncSplice	exon	104866432	104866579	.	-	.	gene_id "ENSG00000136052"; transcript_id "hsCircRNA-100"; exon_number "2" gene_name "SLC41A2"; gene_biotype "protein_coding"; oId "lv:circSLC41A2-514-002"; tissue "lv";
12	ncSplice	exon	104886293	104886439	.	-	.	gene_id "ENSG00000136052"; transcript_id "hsCircRNA-100"; exon_number "3" gene_name "SLC41A2"; gene_biotype "protein_coding"; oId "lv:circSLC41A2-514-002"; tissue "lv";
12	ncSplice	exon	104889033	104889177	.	-	.	gene_id "ENSG00000136052"; transcript_id "hsCircRNA-100"; exon_number "4" gene_name "SLC41A2"; gene_biotype "protein_coding"; oId "lv:circSLC41A2-514-002"; tissue "lv";
12	ncSplice	exon	104895274	104895345	.	-	.	gene_id "ENSG00000136052"; transcript_id "hsCircRNA-100"; exon_number "5" gene_name "SLC41A2"; gene_biotype "protein_coding"; oId "lv:circSLC41A2-514-002"; tissue "lv";
12	ncSplice	exon	104927973	104928694	.	-	.	gene_id "ENSG00000136052"; transcript_id "hsCircRNA-100"; exon_number "6" gene_name "SLC41A2"; gene_biotype "protein_coding"; oId "lv:circSLC41A2-514-002"; tissue "lv";
12	ncSplice	gene	104909655	104928694	.	-	.	gene_id "ENSG00000136052"; gene_name "SLC41A2"; gene_source "ncSplice"; gene_biotype "protein_coding";
12	ncSplice	transcript	104909655	104928694	.	-	.	gene_id "ENSG00000136052"; transcript_id "hsCircRNA-101"; gene_name "SLC41A2"; gene_biotype "protein_coding"; transcript_biotype "circRNA"; oId "lv:circSLC41A2-516-001"; tissue "lv";
12	ncSplice	exon	104909655	104909762	.	-	.	gene_id "ENSG00000136052"; transcript_id "hsCircRNA-101"; exon_number "1" gene_name "SLC41A2"; gene_biotype "protein_coding"; oId "lv:circSLC41A2-516-001"; tissue "lv";
12	ncSplice	exon	104927973	104928694	.	-	.	gene_id "ENSG00000136052"; transcript_id "hsCircRNA-101"; exon_number "2" gene_name "SLC41A2"; gene_biotype "protein_coding"; oId "lv:circSLC41A2-516-001"; tissue "lv";
12	ncSplice	gene	108652272	108654410	.	-	.	gene_id "ENSG00000110880"; gene_name "CORO1C"; gene_source "ncSplice"; gene_biotype "protein_coding";
12	ncSplice	transcript	108652272	108654410	.	-	.	gene_id "ENSG00000110880"; transcript_id "hsCircRNA-102"; gene_name "CORO1C"; gene_biotype "protein_coding"; transcript_biotype "circRNA"; oId "lv:circCORO1C-522-002"; tissue "lv";
12	ncSplice	exon	108652272	108652417	.	-	.	gene_id "ENSG00000110880"; transcript_id "hsCircRNA-102"; exon_number "1" gene_name "CORO1C"; gene_biotype "protein_coding"; oId "lv:circCORO1C-522-002"; tissue "lv";
12	ncSplice	exon	108654306	108654410	.	-	.	gene_id "ENSG00000110880"; transcript_id "hsCircRNA-102"; exon_number "2" gene_name "CORO1C"; gene_biotype "protein_coding"; oId "lv:circCORO1C-522-002"; tissue "lv";
12	ncSplice	gene	11034782	11047188	.	-	.	gene_id "ENSG00000111215"; gene_name "PRR4"; gene_source "ncSplice"; gene_biotype "protein_coding";
12	ncSplice	transcript	11034782	11047188	.	-	.	gene_id "ENSG00000111215"; transcript_id "hsCircRNA-103"; gene_name "PRR4"; gene_biotype "protein_coding"; transcript_biotype "circRNA"; oId "lv:circPRR4-541-001"; tissue "lv";
12	ncSplice	exon	11034782	11034885	.	-	.	gene_id "ENSG00000111215"; transcript_id "hsCircRNA-103"; exon_number "1" gene_name "PRR4"; gene_biotype "protein_coding"; oId "lv:circPRR4-541-001"; tissue "lv";
12	ncSplice	exon	11047020	11047188	.	-	.	gene_id "ENSG00000111215"; transcript_id "hsCircRNA-103"; exon_number "2" gene_name "PRR4"; gene_biotype "protein_coding"; oId "lv:circPRR4-541-001"; tissue "lv";
12	ncSplice	gene	111509549	111510582	.	-	.	gene_id "ENSG00000204842"; gene_name "ATXN2"; gene_source "ncSplice"; gene_biotype "protein_coding";
12	ncSplice	transcript	111509549	111510582	.	-	.	gene_id "ENSG00000204842"; transcript_id "hsCircRNA-104"; gene_name "ATXN2"; gene_biotype "protein_coding"; transcript_biotype "circRNA"; oId "lv:circATXN2-547-001|ce:circATXN2-2146-001|ts:circATXN2-2098-001"; tissue "lv|ce|ts";
12	ncSplice	exon	111509549	111509619	.	-	.	gene_id "ENSG00000204842"; transcript_id "hsCircRNA-104"; exon_number "1" gene_name "ATXN2"; gene_biotype "protein_coding"; oId "lv:circATXN2-547-001|ce:circATXN2-2146-001|ts:circATXN2-2098-001"; tissue "lv|ce|ts";
12	ncSplice	exon	111509891	111509998	.	-	.	gene_id "ENSG00000204842"; transcript_id "hsCircRNA-104"; exon_number "2" gene_name "ATXN2"; gene_biotype "protein_coding"; oId "lv:circATXN2-547-001|ce:circATXN2-2146-001|ts:circATXN2-2098-001"; tissue "lv|ce|ts";
12	ncSplice	exon	111510385	111510582	.	-	.	gene_id "ENSG00000204842"; transcript_id "hsCircRNA-104"; exon_number "3" gene_name "ATXN2"; gene_biotype "protein_coding"; oId "lv:circATXN2-547-001|ce:circATXN2-2146-001|ts:circATXN2-2098-001"; tissue "lv|ce|ts";
12	ncSplice	gene	111552280	111555919	.	-	.	gene_id "ENSG00000204842"; gene_name "ATXN2"; gene_source "ncSplice"; gene_biotype "protein_coding";
12	ncSplice	transcript	111552280	111555919	.	-	.	gene_id "ENSG00000204842"; transcript_id "hsCircRNA-105"; gene_name "ATXN2"; gene_biotype "protein_coding"; transcript_biotype "circRNA"; oId "lv:circATXN2-551-001"; tissue "lv";
12	ncSplice	exon	111552280	111552430	.	-	.	gene_id "ENSG00000204842"; transcript_id "hsCircRNA-105"; exon_number "1" gene_name "ATXN2"; gene_biotype "protein_coding"; oId "lv:circATXN2-551-001"; tissue "lv";
12	ncSplice	exon	111552906	111552977	.	-	.	gene_id "ENSG00000204842"; transcript_id "hsCircRNA-105"; exon_number "2" gene_name "ATXN2"; gene_biotype "protein_coding"; oId "lv:circATXN2-551-001"; tissue "lv";
12	ncSplice	exon	111554158	111554217	.	-	.	gene_id "ENSG00000204842"; transcript_id "hsCircRNA-105"; exon_number "3" gene_name "ATXN2"; gene_biotype "protein_coding"; oId "lv:circATXN2-551-001"; tissue "lv";
12	ncSplice	exon	111555883	111555919	.	-	.	gene_id "ENSG00000204842"; transcript_id "hsCircRNA-105"; exon_number "4" gene_name "ATXN2"; gene_biotype "protein_coding"; oId "lv:circATXN2-551-001"; tissue "lv";
1	ncSplice	gene	211778918	211793190	.	-	.	gene_id "ENSG00000123684"; gene_name "LPGAT1"; gene_source "ncSplice"; gene_biotype "protein_coding";
1	ncSplice	transcript	211778918	211793190	.	-	.	gene_id "ENSG00000123684"; transcript_id "hsCircRNA-106"; gene_name "LPGAT1"; gene_biotype "protein_coding"; transcript_biotype "circRNA"; oId "lv:circLPGAT1-562-001|ce:circLPGAT1-2225-001|ts:circLPGAT1-2141-011"; tissue "lv|ce|ts";
1	ncSplice	exon	211778918	211779044	.	-	.	gene_id "ENSG00000123684"; transcript_id "hsCircRNA-106"; exon_number "1" gene_name "LPGAT1"; gene_biotype "protein_coding"; oId "lv:circLPGAT1-562-001|ce:circLPGAT1-2225-001|ts:circLPGAT1-2141-011"; tissue "lv|ce|ts";
1	ncSplice	exon	211783229	211783502	.	-	.	gene_id "ENSG00000123684"; transcript_id "hsCircRNA-106"; exon_number "2" gene_name "LPGAT1"; gene_biotype "protein_coding"; oId "lv:circLPGAT1-562-001|ce:circLPGAT1-2225-001|ts:circLPGAT1-2141-011"; tissue "lv|ce|ts";
1	ncSplice	exon	211787632	211787727	.	-	.	gene_id "ENSG00000123684"; transcript_id "hsCircRNA-106"; exon_number "3" gene_name "LPGAT1"; gene_biotype "protein_coding"; oId "lv:circLPGAT1-562-001|ce:circLPGAT1-2225-001|ts:circLPGAT1-2141-011"; tissue "lv|ce|ts";
1	ncSplice	exon	211793072	211793190	.	-	.	gene_id "ENSG00000123684"; transcript_id "hsCircRNA-106"; exon_number "4" gene_name "LPGAT1"; gene_biotype "protein_coding"; oId "lv:circLPGAT1-562-001|ce:circLPGAT1-2225-001|ts:circLPGAT1-2141-011"; tissue "lv|ce|ts";
1	ncSplice	gene	211783229	211793190	.	-	.	gene_id "ENSG00000123684"; gene_name "LPGAT1"; gene_source "ncSplice"; gene_biotype "protein_coding";
1	ncSplice	transcript	211783229	211793190	.	-	.	gene_id "ENSG00000123684"; transcript_id "hsCircRNA-107"; gene_name "LPGAT1"; gene_biotype "protein_coding"; transcript_biotype "circRNA"; oId "lv:circLPGAT1-563-001"; tissue "lv";
1	ncSplice	exon	211783229	211783502	.	-	.	gene_id "ENSG00000123684"; transcript_id "hsCircRNA-107"; exon_number "1" gene_name "LPGAT1"; gene_biotype "protein_coding"; oId "lv:circLPGAT1-563-001"; tissue "lv";
1	ncSplice	exon	211787632	211787727	.	-	.	gene_id "ENSG00000123684"; transcript_id "hsCircRNA-107"; exon_number "2" gene_name "LPGAT1"; gene_biotype "protein_coding"; oId "lv:circLPGAT1-563-001"; tissue "lv";
1	ncSplice	exon	211793072	211793190	.	-	.	gene_id "ENSG00000123684"; transcript_id "hsCircRNA-107"; exon_number "3" gene_name "LPGAT1"; gene_biotype "protein_coding"; oId "lv:circLPGAT1-563-001"; tissue "lv";
12	ncSplice	gene	120782655	120784593	.	-	.	gene_id "ENSG00000157837"; gene_name "SPPL3"; gene_source "ncSplice"; gene_biotype "protein_coding";
12	ncSplice	transcript	120782655	120784593	.	-	.	gene_id "ENSG00000157837"; transcript_id "hsCircRNA-108"; gene_name "SPPL3"; gene_biotype "protein_coding"; transcript_biotype "circRNA"; oId "lv:circSPPL3-570-001|ce:circSPPL3-2257-001|ts:circSPPL3-2174-001"; tissue "lv|ce|ts";
12	ncSplice	exon	120782655	120782767	.	-	.	gene_id "ENSG00000157837"; transcript_id "hsCircRNA-108"; exon_number "1" gene_name "SPPL3"; gene_biotype "protein_coding"; oId "lv:circSPPL3-570-001|ce:circSPPL3-2257-001|ts:circSPPL3-2174-001"; tissue "lv|ce|ts";
12	ncSplice	exon	120783674	120783752	.	-	.	gene_id "ENSG00000157837"; transcript_id "hsCircRNA-108"; exon_number "2" gene_name "SPPL3"; gene_biotype "protein_coding"; oId "lv:circSPPL3-570-001|ce:circSPPL3-2257-001|ts:circSPPL3-2174-001"; tissue "lv|ce|ts";
12	ncSplice	exon	120784474	120784593	.	-	.	gene_id "ENSG00000157837"; transcript_id "hsCircRNA-108"; exon_number "3" gene_name "SPPL3"; gene_biotype "protein_coding"; oId "lv:circSPPL3-570-001|ce:circSPPL3-2257-001|ts:circSPPL3-2174-001"; tissue "lv|ce|ts";
12	ncSplice	gene	120782655	120791557	.	-	.	gene_id "ENSG00000157837"; gene_name "SPPL3"; gene_source "ncSplice"; gene_biotype "protein_coding";
12	ncSplice	transcript	120782655	120791557	.	-	.	gene_id "ENSG00000157837"; transcript_id "hsCircRNA-109"; gene_name "SPPL3"; gene_biotype "protein_coding"; transcript_biotype "circRNA"; oId "lv:circSPPL3-571-001|ce:circSPPL3-2258-001|ts:circSPPL3-2175-001"; tissue "lv|ce|ts";
12	ncSplice	exon	120782655	120782767	.	-	.	gene_id "ENSG00000157837"; transcript_id "hsCircRNA-109"; exon_number "1" gene_name "SPPL3"; gene_biotype "protein_coding"; oId "lv:circSPPL3-571-001|ce:circSPPL3-2258-001|ts:circSPPL3-2175-001"; tissue "lv|ce|ts";
12	ncSplice	exon	120783674	120783752	.	-	.	gene_id "ENSG00000157837"; transcript_id "hsCircRNA-109"; exon_number "2" gene_name "SPPL3"; gene_biotype "protein_coding"; oId "lv:circSPPL3-571-001|ce:circSPPL3-2258-001|ts:circSPPL3-2175-001"; tissue "lv|ce|ts";
12	ncSplice	exon	120784474	120784593	.	-	.	gene_id "ENSG00000157837"; transcript_id "hsCircRNA-109"; exon_number "3" gene_name "SPPL3"; gene_biotype "protein_coding"; oId "lv:circSPPL3-571-001|ce:circSPPL3-2258-001|ts:circSPPL3-2175-001"; tissue "lv|ce|ts";
12	ncSplice	exon	120791469	120791557	.	-	.	gene_id "ENSG00000157837"; transcript_id "hsCircRNA-109"; exon_number "4" gene_name "SPPL3"; gene_biotype "protein_coding"; oId "lv:circSPPL3-571-001|ce:circSPPL3-2258-001|ts:circSPPL3-2175-001"; tissue "lv|ce|ts";
12	ncSplice	gene	120970243	120974598	.	-	.	gene_id "ENSG00000241388"; gene_name "HNF1A-AS1"; gene_source "ncSplice"; gene_biotype "processed_transcript";
12	ncSplice	transcript	120970243	120974598	.	-	.	gene_id "ENSG00000241388"; transcript_id "hsCircRNA-110"; gene_name "HNF1A-AS1"; gene_biotype "processed_transcript"; transcript_biotype "circRNA"; oId "lv:circHNF1A-AS1-572-001"; tissue "lv";
12	ncSplice	exon	120970243	120970370	.	-	.	gene_id "ENSG00000241388"; transcript_id "hsCircRNA-110"; exon_number "1" gene_name "HNF1A-AS1"; gene_biotype "processed_transcript"; oId "lv:circHNF1A-AS1-572-001"; tissue "lv";
12	ncSplice	exon	120974485	120974598	.	-	.	gene_id "ENSG00000241388"; transcript_id "hsCircRNA-110"; exon_number "2" gene_name "HNF1A-AS1"; gene_biotype "processed_transcript"; oId "lv:circHNF1A-AS1-572-001"; tissue "lv";
12	ncSplice	gene	120970298	120974598	.	-	.	gene_id "ENSG00000241388"; gene_name "HNF1A-AS1"; gene_source "ncSplice"; gene_biotype "processed_transcript";
12	ncSplice	transcript	120970298	120974598	.	-	.	gene_id "ENSG00000241388"; transcript_id "hsCircRNA-111"; gene_name "HNF1A-AS1"; gene_biotype "processed_transcript"; transcript_biotype "circRNA"; oId "lv:circHNF1A-AS1-573-001"; tissue "lv";
12	ncSplice	exon	120970298	120970370	.	-	.	gene_id "ENSG00000241388"; transcript_id "hsCircRNA-111"; exon_number "1" gene_name "HNF1A-AS1"; gene_biotype "processed_transcript"; oId "lv:circHNF1A-AS1-573-001"; tissue "lv";
12	ncSplice	exon	120974485	120974598	.	-	.	gene_id "ENSG00000241388"; transcript_id "hsCircRNA-111"; exon_number "2" gene_name "HNF1A-AS1"; gene_biotype "processed_transcript"; oId "lv:circHNF1A-AS1-573-001"; tissue "lv";
1	ncSplice	gene	21272699	21290156	.	-	.	gene_id "ENSG00000117298"; gene_name "ECE1"; gene_source "ncSplice"; gene_biotype "protein_coding";
1	ncSplice	transcript	21272699	21290156	.	-	.	gene_id "ENSG00000117298"; transcript_id "hsCircRNA-112"; gene_name "ECE1"; gene_biotype "protein_coding"; transcript_biotype "circRNA"; oId "lv:circECE1-594-001|ts:circECE1-2245-001"; tissue "lv|ts";
1	ncSplice	exon	21272699	21272911	.	-	.	gene_id "ENSG00000117298"; transcript_id "hsCircRNA-112"; exon_number "1" gene_name "ECE1"; gene_biotype "protein_coding"; oId "lv:circECE1-594-001|ts:circECE1-2245-001"; tissue "lv|ts";
1	ncSplice	exon	21279191	21279332	.	-	.	gene_id "ENSG00000117298"; transcript_id "hsCircRNA-112"; exon_number "2" gene_name "ECE1"; gene_biotype "protein_coding"; oId "lv:circECE1-594-001|ts:circECE1-2245-001"; tissue "lv|ts";
1	ncSplice	exon	21290070	21290156	.	-	.	gene_id "ENSG00000117298"; transcript_id "hsCircRNA-112"; exon_number "3" gene_name "ECE1"; gene_biotype "protein_coding"; oId "lv:circECE1-594-001|ts:circECE1-2245-001"; tissue "lv|ts";
1	ncSplice	gene	213996469	214011715	.	+	.	gene_id "ENSG00000117707"; gene_name "PROX1"; gene_source "ncSplice"; gene_biotype "protein_coding";
1	ncSplice	transcript	213996469	214011715	.	+	.	gene_id "ENSG00000117707"; transcript_id "hsCircRNA-113"; gene_name "PROX1"; gene_biotype "protein_coding"; transcript_biotype "circRNA"; oId "lv:circPROX1-606-001"; tissue "lv";
1	ncSplice	exon	213996469	213998262	.	+	.	gene_id "ENSG00000117707"; transcript_id "hsCircRNA-113"; exon_number "1" gene_name "PROX1"; gene_biotype "protein_coding"; oId "lv:circPROX1-606-001"; tissue "lv";
1	ncSplice	exon	214005167	214011715	.	+	.	gene_id "ENSG00000117707"; transcript_id "hsCircRNA-113"; exon_number "2" gene_name "PROX1"; gene_biotype "protein_coding"; oId "lv:circPROX1-606-001"; tissue "lv";
12	ncSplice	gene	14456561	14457295	.	+	.	gene_id "ENSG00000171681"; gene_name "ATF7IP"; gene_source "ncSplice"; gene_biotype "protein_coding";
12	ncSplice	transcript	14456561	14457295	.	+	.	gene_id "ENSG00000171681"; transcript_id "hsCircRNA-114"; gene_name "ATF7IP"; gene_biotype "protein_coding"; transcript_biotype "circRNA"; oId "lv:circATF7IP-608-001|ce:circATF7IP-2404-001"; tissue "lv|ce";
12	ncSplice	exon	14456561	14456634	.	+	.	gene_id "ENSG00000171681"; transcript_id "hsCircRNA-114"; exon_number "1" gene_name "ATF7IP"; gene_biotype "protein_coding"; oId "lv:circATF7IP-608-001|ce:circATF7IP-2404-001"; tissue "lv|ce";
12	ncSplice	exon	14457207	14457295	.	+	.	gene_id "ENSG00000171681"; transcript_id "hsCircRNA-114"; exon_number "2" gene_name "ATF7IP"; gene_biotype "protein_coding"; oId "lv:circATF7IP-608-001|ce:circATF7IP-2404-001"; tissue "lv|ce";
1	ncSplice	gene	219193082	219218712	.	+	.	gene_id "ENSG00000143353"; gene_name "LYPLAL1"; gene_source "ncSplice"; gene_biotype "protein_coding";
1	ncSplice	transcript	219193082	219218712	.	+	.	gene_id "ENSG00000143353"; transcript_id "hsCircRNA-115"; gene_name "LYPLAL1"; gene_biotype "protein_coding"; transcript_biotype "circRNA"; oId "lv:circLYPLAL1-615-001"; tissue "lv";
1	ncSplice	exon	219193082	219193251	.	+	.	gene_id "ENSG00000143353"; transcript_id "hsCircRNA-115"; exon_number "1" gene_name "LYPLAL1"; gene_biotype "protein_coding"; oId "lv:circLYPLAL1-615-001"; tissue "lv";
1	ncSplice	exon	219210532	219210647	.	+	.	gene_id "ENSG00000143353"; transcript_id "hsCircRNA-115"; exon_number "2" gene_name "LYPLAL1"; gene_biotype "protein_coding"; oId "lv:circLYPLAL1-615-001"; tissue "lv";
1	ncSplice	exon	219211492	219218712	.	+	.	gene_id "ENSG00000143353"; transcript_id "hsCircRNA-115"; exon_number "3" gene_name "LYPLAL1"; gene_biotype "protein_coding"; oId "lv:circLYPLAL1-615-001"; tissue "lv";
1	ncSplice	gene	219193082	219241308	.	+	.	gene_id "ENSG00000143353"; gene_name "LYPLAL1"; gene_source "ncSplice"; gene_biotype "protein_coding";
1	ncSplice	transcript	219193082	219241308	.	+	.	gene_id "ENSG00000143353"; transcript_id "hsCircRNA-116"; gene_name "LYPLAL1"; gene_biotype "protein_coding"; transcript_biotype "circRNA"; oId "lv:circLYPLAL1-616-001"; tissue "lv";
1	ncSplice	exon	219193082	219193251	.	+	.	gene_id "ENSG00000143353"; transcript_id "hsCircRNA-116"; exon_number "1" gene_name "LYPLAL1"; gene_biotype "protein_coding"; oId "lv:circLYPLAL1-616-001"; tissue "lv";
1	ncSplice	exon	219210532	219210647	.	+	.	gene_id "ENSG00000143353"; transcript_id "hsCircRNA-116"; exon_number "2" gene_name "LYPLAL1"; gene_biotype "protein_coding"; oId "lv:circLYPLAL1-616-001"; tissue "lv";
1	ncSplice	exon	219211492	219241308	.	+	.	gene_id "ENSG00000143353"; transcript_id "hsCircRNA-116"; exon_number "3" gene_name "LYPLAL1"; gene_biotype "protein_coding"; oId "lv:circLYPLAL1-616-001"; tissue "lv";
12	ncSplice	gene	19462510	19473355	.	+	.	gene_id "ENSG00000139154"; gene_name "AEBP2"; gene_source "ncSplice"; gene_biotype "protein_coding";
12	ncSplice	transcript	19462510	19473355	.	+	.	gene_id "ENSG00000139154"; transcript_id "hsCircRNA-117"; gene_name "AEBP2"; gene_biotype "protein_coding"; transcript_biotype "circRNA"; oId "lv:circAEBP2-621-001"; tissue "lv";
12	ncSplice	exon	19462510	19462717	.	+	.	gene_id "ENSG00000139154"; transcript_id "hsCircRNA-117"; exon_number "1" gene_name "AEBP2"; gene_biotype "protein_coding"; oId "lv:circAEBP2-621-001"; tissue "lv";
12	ncSplice	exon	19473248	19473355	.	+	.	gene_id "ENSG00000139154"; transcript_id "hsCircRNA-117"; exon_number "2" gene_name "AEBP2"; gene_biotype "protein_coding"; oId "lv:circAEBP2-621-001"; tissue "lv";
1	ncSplice	gene	220006106	220007338	.	-	.	gene_id "ENSG00000136628"; gene_name "EPRS"; gene_source "ncSplice"; gene_biotype "protein_coding";
1	ncSplice	transcript	220006106	220007338	.	-	.	gene_id "ENSG00000136628"; transcript_id "hsCircRNA-118"; gene_name "EPRS"; gene_biotype "protein_coding"; transcript_biotype "circRNA"; oId "lv:circEPRS-623-001|ce:circEPRS-2458-001"; tissue "lv|ce";
1	ncSplice	exon	220006106	220006313	.	-	.	gene_id "ENSG00000136628"; transcript_id "hsCircRNA-118"; exon_number "1" gene_name "EPRS"; gene_biotype "protein_coding"; oId "lv:circEPRS-623-001|ce:circEPRS-2458-001"; tissue "lv|ce";
1	ncSplice	exon	220007202	220007338	.	-	.	gene_id "ENSG00000136628"; transcript_id "hsCircRNA-118"; exon_number "2" gene_name "EPRS"; gene_biotype "protein_coding"; oId "lv:circEPRS-623-001|ce:circEPRS-2458-001"; tissue "lv|ce";
1	ncSplice	gene	220761658	220770556	.	+	.	gene_id "ENSG00000117791"; gene_name "MARC2"; gene_source "ncSplice"; gene_biotype "protein_coding";
1	ncSplice	transcript	220761658	220770556	.	+	.	gene_id "ENSG00000117791"; transcript_id "hsCircRNA-119"; gene_name "MARC2"; gene_biotype "protein_coding"; transcript_biotype "circRNA"; oId "lv:circMARC2-625-001"; tissue "lv";
1	ncSplice	exon	220761658	220761820	.	+	.	gene_id "ENSG00000117791"; transcript_id "hsCircRNA-119"; exon_number "1" gene_name "MARC2"; gene_biotype "protein_coding"; oId "lv:circMARC2-625-001"; tissue "lv";
1	ncSplice	exon	220762910	220770556	.	+	.	gene_id "ENSG00000117791"; transcript_id "hsCircRNA-119"; exon_number "2" gene_name "MARC2"; gene_biotype "protein_coding"; oId "lv:circMARC2-625-001"; tissue "lv";
12	ncSplice	gene	23734684	23755724	.	-	.	gene_id "ENSG00000134532"; gene_name "SOX5"; gene_source "ncSplice"; gene_biotype "protein_coding";
12	ncSplice	transcript	23734684	23755724	.	-	.	gene_id "ENSG00000134532"; transcript_id "hsCircRNA-120"; gene_name "SOX5"; gene_biotype "protein_coding"; transcript_biotype "circRNA"; oId "lv:circSOX5-631-001"; tissue "lv";
12	ncSplice	exon	23734684	23734752	.	-	.	gene_id "ENSG00000134532"; transcript_id "hsCircRNA-120"; exon_number "1" gene_name "SOX5"; gene_biotype "protein_coding"; oId "lv:circSOX5-631-001"; tissue "lv";
12	ncSplice	exon	23740867	23741039	.	-	.	gene_id "ENSG00000134532"; transcript_id "hsCircRNA-120"; exon_number "2" gene_name "SOX5"; gene_biotype "protein_coding"; oId "lv:circSOX5-631-001"; tissue "lv";
12	ncSplice	exon	23755638	23755724	.	-	.	gene_id "ENSG00000134532"; transcript_id "hsCircRNA-120"; exon_number "3" gene_name "SOX5"; gene_biotype "protein_coding"; oId "lv:circSOX5-631-001"; tissue "lv";
12	ncSplice	gene	23845983	23896024	.	-	.	gene_id "ENSG00000134532"; gene_name "SOX5"; gene_source "ncSplice"; gene_biotype "protein_coding";
12	ncSplice	transcript	23845983	23896024	.	-	.	gene_id "ENSG00000134532"; transcript_id "hsCircRNA-121"; gene_name "SOX5"; gene_biotype "protein_coding"; transcript_biotype "circRNA"; oId "lv:circSOX5-633-001"; tissue "lv";
12	ncSplice	exon	23845983	23846193	.	-	.	gene_id "ENSG00000134532"; transcript_id "hsCircRNA-121"; exon_number "1" gene_name "SOX5"; gene_biotype "protein_coding"; oId "lv:circSOX5-633-001"; tissue "lv";
12	ncSplice	exon	23895898	23896024	.	-	.	gene_id "ENSG00000134532"; transcript_id "hsCircRNA-121"; exon_number "2" gene_name "SOX5"; gene_biotype "protein_coding"; oId "lv:circSOX5-633-001"; tissue "lv";
12	ncSplice	gene	26578713	26602706	.	-	.	gene_id "ENSG00000123104"; gene_name "ITPR2"; gene_source "ncSplice"; gene_biotype "protein_coding";
12	ncSplice	transcript	26578713	26602706	.	-	.	gene_id "ENSG00000123104"; transcript_id "hsCircRNA-122"; gene_name "ITPR2"; gene_biotype "protein_coding"; transcript_biotype "circRNA"; oId "lv:circITPR2-639-001"; tissue "lv";
12	ncSplice	exon	26578713	26578833	.	-	.	gene_id "ENSG00000123104"; transcript_id "hsCircRNA-122"; exon_number "1" gene_name "ITPR2"; gene_biotype "protein_coding"; oId "lv:circITPR2-639-001"; tissue "lv";
12	ncSplice	exon	26580027	26580155	.	-	.	gene_id "ENSG00000123104"; transcript_id "hsCircRNA-122"; exon_number "2" gene_name "ITPR2"; gene_biotype "protein_coding"; oId "lv:circITPR2-639-001"; tissue "lv";
12	ncSplice	exon	26595465	26595590	.	-	.	gene_id "ENSG00000123104"; transcript_id "hsCircRNA-122"; exon_number "3" gene_name "ITPR2"; gene_biotype "protein_coding"; oId "lv:circITPR2-639-001"; tissue "lv";
12	ncSplice	exon	26596883	26597134	.	-	.	gene_id "ENSG00000123104"; transcript_id "hsCircRNA-122"; exon_number "4" gene_name "ITPR2"; gene_biotype "protein_coding"; oId "lv:circITPR2-639-001"; tissue "lv";
12	ncSplice	exon	26599145	26599345	.	-	.	gene_id "ENSG00000123104"; transcript_id "hsCircRNA-122"; exon_number "5" gene_name "ITPR2"; gene_biotype "protein_coding"; oId "lv:circITPR2-639-001"; tissue "lv";
12	ncSplice	exon	26599987	26600109	.	-	.	gene_id "ENSG00000123104"; transcript_id "hsCircRNA-122"; exon_number "6" gene_name "ITPR2"; gene_biotype "protein_coding"; oId "lv:circITPR2-639-001"; tissue "lv";
12	ncSplice	exon	26602370	26602495	.	-	.	gene_id "ENSG00000123104"; transcript_id "hsCircRNA-122"; exon_number "7" gene_name "ITPR2"; gene_biotype "protein_coding"; oId "lv:circITPR2-639-001"; tissue "lv";
12	ncSplice	exon	26602617	26602706	.	-	.	gene_id "ENSG00000123104"; transcript_id "hsCircRNA-122"; exon_number "8" gene_name "ITPR2"; gene_biotype "protein_coding"; oId "lv:circITPR2-639-001"; tissue "lv";
12	ncSplice	gene	26595465	26602706	.	-	.	gene_id "ENSG00000123104"; gene_name "ITPR2"; gene_source "ncSplice"; gene_biotype "protein_coding";
12	ncSplice	transcript	26595465	26602706	.	-	.	gene_id "ENSG00000123104"; transcript_id "hsCircRNA-123"; gene_name "ITPR2"; gene_biotype "protein_coding"; transcript_biotype "circRNA"; oId "lv:circITPR2-640-001"; tissue "lv";
12	ncSplice	exon	26595465	26595590	.	-	.	gene_id "ENSG00000123104"; transcript_id "hsCircRNA-123"; exon_number "1" gene_name "ITPR2"; gene_biotype "protein_coding"; oId "lv:circITPR2-640-001"; tissue "lv";
12	ncSplice	exon	26596883	26597134	.	-	.	gene_id "ENSG00000123104"; transcript_id "hsCircRNA-123"; exon_number "2" gene_name "ITPR2"; gene_biotype "protein_coding"; oId "lv:circITPR2-640-001"; tissue "lv";
12	ncSplice	exon	26599145	26599345	.	-	.	gene_id "ENSG00000123104"; transcript_id "hsCircRNA-123"; exon_number "3" gene_name "ITPR2"; gene_biotype "protein_coding"; oId "lv:circITPR2-640-001"; tissue "lv";
12	ncSplice	exon	26599987	26600109	.	-	.	gene_id "ENSG00000123104"; transcript_id "hsCircRNA-123"; exon_number "4" gene_name "ITPR2"; gene_biotype "protein_coding"; oId "lv:circITPR2-640-001"; tissue "lv";
12	ncSplice	exon	26602370	26602495	.	-	.	gene_id "ENSG00000123104"; transcript_id "hsCircRNA-123"; exon_number "5" gene_name "ITPR2"; gene_biotype "protein_coding"; oId "lv:circITPR2-640-001"; tissue "lv";
12	ncSplice	exon	26602617	26602706	.	-	.	gene_id "ENSG00000123104"; transcript_id "hsCircRNA-123"; exon_number "6" gene_name "ITPR2"; gene_biotype "protein_coding"; oId "lv:circITPR2-640-001"; tissue "lv";
12	ncSplice	gene	27714780	27724186	.	+	.	gene_id "ENSG00000061794"; gene_name "MRPS35"; gene_source "ncSplice"; gene_biotype "protein_coding";
12	ncSplice	transcript	27714780	27724186	.	+	.	gene_id "ENSG00000061794"; transcript_id "hsCircRNA-124"; gene_name "MRPS35"; gene_biotype "protein_coding"; transcript_biotype "circRNA"; oId "lv:circMRPS35-649-001|ts:circMRPS35-2456-001"; tissue "lv|ts";
12	ncSplice	exon	27714780	27714820	.	+	.	gene_id "ENSG00000061794"; transcript_id "hsCircRNA-124"; exon_number "1" gene_name "MRPS35"; gene_biotype "protein_coding"; oId "lv:circMRPS35-649-001|ts:circMRPS35-2456-001"; tissue "lv|ts";
12	ncSplice	exon	27716291	27716458	.	+	.	gene_id "ENSG00000061794"; transcript_id "hsCircRNA-124"; exon_number "2" gene_name "MRPS35"; gene_biotype "protein_coding"; oId "lv:circMRPS35-649-001|ts:circMRPS35-2456-001"; tissue "lv|ts";
12	ncSplice	exon	27719808	27719868	.	+	.	gene_id "ENSG00000061794"; transcript_id "hsCircRNA-124"; exon_number "3" gene_name "MRPS35"; gene_biotype "protein_coding"; oId "lv:circMRPS35-649-001|ts:circMRPS35-2456-001"; tissue "lv|ts";
12	ncSplice	exon	27724047	27724186	.	+	.	gene_id "ENSG00000061794"; transcript_id "hsCircRNA-124"; exon_number "4" gene_name "MRPS35"; gene_biotype "protein_coding"; oId "lv:circMRPS35-649-001|ts:circMRPS35-2456-001"; tissue "lv|ts";
1	ncSplice	gene	23030469	23050520	.	+	.	gene_id "ENSG00000004487"; gene_name "KDM1A"; gene_source "ncSplice"; gene_biotype "protein_coding";
1	ncSplice	transcript	23030469	23050520	.	+	.	gene_id "ENSG00000004487"; transcript_id "hsCircRNA-125"; gene_name "KDM1A"; gene_biotype "protein_coding"; transcript_biotype "circRNA"; oId "lv:circKDM1A-655-001|ce:circKDM1A-2581-006|ts:circKDM1A-2487-012"; tissue "lv|ce|ts";
1	ncSplice	exon	23030469	23030634	.	+	.	gene_id "ENSG00000004487"; transcript_id "hsCircRNA-125"; exon_number "1" gene_name "KDM1A"; gene_biotype "protein_coding"; oId "lv:circKDM1A-655-001|ce:circKDM1A-2581-006|ts:circKDM1A-2487-012"; tissue "lv|ce|ts";
1	ncSplice	exon	23044427	23044486	.	+	.	gene_id "ENSG00000004487"; transcript_id "hsCircRNA-125"; exon_number "2" gene_name "KDM1A"; gene_biotype "protein_coding"; oId "lv:circKDM1A-655-001|ce:circKDM1A-2581-006|ts:circKDM1A-2487-012"; tissue "lv|ce|ts";
1	ncSplice	exon	23050387	23050520	.	+	.	gene_id "ENSG00000004487"; transcript_id "hsCircRNA-125"; exon_number "3" gene_name "KDM1A"; gene_biotype "protein_coding"; oId "lv:circKDM1A-655-001|ce:circKDM1A-2581-006|ts:circKDM1A-2487-012"; tissue "lv|ce|ts";
1	ncSplice	gene	23397545	23418016	.	-	.	gene_id "ENSG00000204219"; gene_name "TCEA3"; gene_source "ncSplice"; gene_biotype "protein_coding";
1	ncSplice	transcript	23397545	23418016	.	-	.	gene_id "ENSG00000204219"; transcript_id "hsCircRNA-126"; gene_name "TCEA3"; gene_biotype "protein_coding"; transcript_biotype "circRNA"; oId "lv:circTCEA3-673-001"; tissue "lv";
1	ncSplice	exon	23397545	23397601	.	-	.	gene_id "ENSG00000204219"; transcript_id "hsCircRNA-126"; exon_number "1" gene_name "TCEA3"; gene_biotype "protein_coding"; oId "lv:circTCEA3-673-001"; tissue "lv";
1	ncSplice	exon	23397792	23397955	.	-	.	gene_id "ENSG00000204219"; transcript_id "hsCircRNA-126"; exon_number "2" gene_name "TCEA3"; gene_biotype "protein_coding"; oId "lv:circTCEA3-673-001"; tissue "lv";
1	ncSplice	exon	23408664	23408726	.	-	.	gene_id "ENSG00000204219"; transcript_id "hsCircRNA-126"; exon_number "3" gene_name "TCEA3"; gene_biotype "protein_coding"; oId "lv:circTCEA3-673-001"; tissue "lv";
1	ncSplice	exon	23417249	23417390	.	-	.	gene_id "ENSG00000204219"; transcript_id "hsCircRNA-126"; exon_number "4" gene_name "TCEA3"; gene_biotype "protein_coding"; oId "lv:circTCEA3-673-001"; tissue "lv";
1	ncSplice	exon	23417904	23418016	.	-	.	gene_id "ENSG00000204219"; transcript_id "hsCircRNA-126"; exon_number "5" gene_name "TCEA3"; gene_biotype "protein_coding"; oId "lv:circTCEA3-673-001"; tissue "lv";
12	ncSplice	gene	42210355	42210680	.	-	.	gene_id "ENSG00000015153"; gene_name "YAF2"; gene_source "ncSplice"; gene_biotype "protein_coding";
12	ncSplice	transcript	42210355	42210680	.	-	.	gene_id "ENSG00000015153"; transcript_id "hsCircRNA-127"; gene_name "YAF2"; gene_biotype "protein_coding"; transcript_biotype "circRNA"; oId "lv:circYAF2-688-001|ce:circYAF2-2843-001|ts:circYAF2-2625-001"; tissue "lv|ce|ts";
12	ncSplice	exon	42210355	42210454	.	-	.	gene_id "ENSG00000015153"; transcript_id "hsCircRNA-127"; exon_number "1" gene_name "YAF2"; gene_biotype "protein_coding"; oId "lv:circYAF2-688-001|ce:circYAF2-2843-001|ts:circYAF2-2625-001"; tissue "lv|ce|ts";
12	ncSplice	exon	42210548	42210680	.	-	.	gene_id "ENSG00000015153"; transcript_id "hsCircRNA-127"; exon_number "2" gene_name "YAF2"; gene_biotype "protein_coding"; oId "lv:circYAF2-688-001|ce:circYAF2-2843-001|ts:circYAF2-2625-001"; tissue "lv|ce|ts";
1	ncSplice	gene	243415702	243426558	.	+	.	gene_id "ENSG00000054282"; gene_name "SDCCAG8"; gene_source "ncSplice"; gene_biotype "protein_coding";
1	ncSplice	transcript	243415702	243426558	.	+	.	gene_id "ENSG00000054282"; transcript_id "hsCircRNA-128"; gene_name "SDCCAG8"; gene_biotype "protein_coding"; transcript_biotype "circRNA"; oId "lv:circSDCCAG8-695-001|ce:circSDCCAG8-2860-001|ts:circSDCCAG8-2649-001"; tissue "lv|ce|ts";
1	ncSplice	exon	243415702	243415829	.	+	.	gene_id "ENSG00000054282"; transcript_id "hsCircRNA-128"; exon_number "1" gene_name "SDCCAG8"; gene_biotype "protein_coding"; oId "lv:circSDCCAG8-695-001|ce:circSDCCAG8-2860-001|ts:circSDCCAG8-2649-001"; tissue "lv|ce|ts";
1	ncSplice	exon	243417968	243418076	.	+	.	gene_id "ENSG00000054282"; transcript_id "hsCircRNA-128"; exon_number "2" gene_name "SDCCAG8"; gene_biotype "protein_coding"; oId "lv:circSDCCAG8-695-001|ce:circSDCCAG8-2860-001|ts:circSDCCAG8-2649-001"; tissue "lv|ce|ts";
1	ncSplice	exon	243426427	243426558	.	+	.	gene_id "ENSG00000054282"; transcript_id "hsCircRNA-128"; exon_number "3" gene_name "SDCCAG8"; gene_biotype "protein_coding"; oId "lv:circSDCCAG8-695-001|ce:circSDCCAG8-2860-001|ts:circSDCCAG8-2649-001"; tissue "lv|ce|ts";
12	ncSplice	gene	50427762	50429090	.	+	.	gene_id "ENSG00000161813"; gene_name "LARP4"; gene_source "ncSplice"; gene_biotype "protein_coding";
12	ncSplice	transcript	50427762	50429090	.	+	.	gene_id "ENSG00000161813"; transcript_id "hsCircRNA-129"; gene_name "LARP4"; gene_biotype "protein_coding"; transcript_biotype "circRNA"; oId "lv:circLARP4-710-001|ce:circLARP4-2947-001"; tissue "lv|ce";
12	ncSplice	exon	50427762	50427909	.	+	.	gene_id "ENSG00000161813"; transcript_id "hsCircRNA-129"; exon_number "1" gene_name "LARP4"; gene_biotype "protein_coding"; oId "lv:circLARP4-710-001|ce:circLARP4-2947-001"; tissue "lv|ce";
12	ncSplice	exon	50428935	50429090	.	+	.	gene_id "ENSG00000161813"; transcript_id "hsCircRNA-129"; exon_number "2" gene_name "LARP4"; gene_biotype "protein_coding"; oId "lv:circLARP4-710-001|ce:circLARP4-2947-001"; tissue "lv|ce";
12	ncSplice	gene	50427762	50430570	.	+	.	gene_id "ENSG00000161813"; gene_name "LARP4"; gene_source "ncSplice"; gene_biotype "protein_coding";
12	ncSplice	transcript	50427762	50430570	.	+	.	gene_id "ENSG00000161813"; transcript_id "hsCircRNA-130"; gene_name "LARP4"; gene_biotype "protein_coding"; transcript_biotype "circRNA"; oId "lv:circLARP4-711-002|ce:circLARP4-2948-002|ts:circLARP4-2759-002"; tissue "lv|ce|ts";
12	ncSplice	exon	50427762	50427909	.	+	.	gene_id "ENSG00000161813"; transcript_id "hsCircRNA-130"; exon_number "1" gene_name "LARP4"; gene_biotype "protein_coding"; oId "lv:circLARP4-711-002|ce:circLARP4-2948-002|ts:circLARP4-2759-002"; tissue "lv|ce|ts";
12	ncSplice	exon	50428935	50429090	.	+	.	gene_id "ENSG00000161813"; transcript_id "hsCircRNA-130"; exon_number "2" gene_name "LARP4"; gene_biotype "protein_coding"; oId "lv:circLARP4-711-002|ce:circLARP4-2948-002|ts:circLARP4-2759-002"; tissue "lv|ce|ts";
12	ncSplice	exon	50430498	50430570	.	+	.	gene_id "ENSG00000161813"; transcript_id "hsCircRNA-130"; exon_number "3" gene_name "LARP4"; gene_biotype "protein_coding"; oId "lv:circLARP4-711-002|ce:circLARP4-2948-002|ts:circLARP4-2759-002"; tissue "lv|ce|ts";
12	ncSplice	gene	50427762	50435624	.	+	.	gene_id "ENSG00000161813"; gene_name "LARP4"; gene_source "ncSplice"; gene_biotype "protein_coding";
12	ncSplice	transcript	50427762	50435624	.	+	.	gene_id "ENSG00000161813"; transcript_id "hsCircRNA-131"; gene_name "LARP4"; gene_biotype "protein_coding"; transcript_biotype "circRNA"; oId "lv:circLARP4-712-003"; tissue "lv";
12	ncSplice	exon	50427762	50427909	.	+	.	gene_id "ENSG00000161813"; transcript_id "hsCircRNA-131"; exon_number "1" gene_name "LARP4"; gene_biotype "protein_coding"; oId "lv:circLARP4-712-003"; tissue "lv";
12	ncSplice	exon	50428935	50429090	.	+	.	gene_id "ENSG00000161813"; transcript_id "hsCircRNA-131"; exon_number "2" gene_name "LARP4"; gene_biotype "protein_coding"; oId "lv:circLARP4-712-003"; tissue "lv";
12	ncSplice	exon	50430495	50430570	.	+	.	gene_id "ENSG00000161813"; transcript_id "hsCircRNA-131"; exon_number "3" gene_name "LARP4"; gene_biotype "protein_coding"; oId "lv:circLARP4-712-003"; tissue "lv";
12	ncSplice	exon	50435488	50435624	.	+	.	gene_id "ENSG00000161813"; transcript_id "hsCircRNA-131"; exon_number "4" gene_name "LARP4"; gene_biotype "protein_coding"; oId "lv:circLARP4-712-003"; tissue "lv";
12	ncSplice	gene	50427762	50441643	.	+	.	gene_id "ENSG00000161813"; gene_name "LARP4"; gene_source "ncSplice"; gene_biotype "protein_coding";
12	ncSplice	transcript	50427762	50441643	.	+	.	gene_id "ENSG00000161813"; transcript_id "hsCircRNA-132"; gene_name "LARP4"; gene_biotype "protein_coding"; transcript_biotype "circRNA"; oId "lv:circLARP4-714-003|ce:circLARP4-2950-005|ts:circLARP4-2762-005"; tissue "lv|ce|ts";
12	ncSplice	exon	50427762	50427909	.	+	.	gene_id "ENSG00000161813"; transcript_id "hsCircRNA-132"; exon_number "1" gene_name "LARP4"; gene_biotype "protein_coding"; oId "lv:circLARP4-714-003|ce:circLARP4-2950-005|ts:circLARP4-2762-005"; tissue "lv|ce|ts";
12	ncSplice	exon	50428935	50429090	.	+	.	gene_id "ENSG00000161813"; transcript_id "hsCircRNA-132"; exon_number "2" gene_name "LARP4"; gene_biotype "protein_coding"; oId "lv:circLARP4-714-003|ce:circLARP4-2950-005|ts:circLARP4-2762-005"; tissue "lv|ce|ts";
12	ncSplice	exon	50430495	50430570	.	+	.	gene_id "ENSG00000161813"; transcript_id "hsCircRNA-132"; exon_number "3" gene_name "LARP4"; gene_biotype "protein_coding"; oId "lv:circLARP4-714-003|ce:circLARP4-2950-005|ts:circLARP4-2762-005"; tissue "lv|ce|ts";
12	ncSplice	exon	50435488	50435624	.	+	.	gene_id "ENSG00000161813"; transcript_id "hsCircRNA-132"; exon_number "4" gene_name "LARP4"; gene_biotype "protein_coding"; oId "lv:circLARP4-714-003|ce:circLARP4-2950-005|ts:circLARP4-2762-005"; tissue "lv|ce|ts";
12	ncSplice	exon	50437735	50437838	.	+	.	gene_id "ENSG00000161813"; transcript_id "hsCircRNA-132"; exon_number "5" gene_name "LARP4"; gene_biotype "protein_coding"; oId "lv:circLARP4-714-003|ce:circLARP4-2950-005|ts:circLARP4-2762-005"; tissue "lv|ce|ts";
12	ncSplice	exon	50440439	50440549	.	+	.	gene_id "ENSG00000161813"; transcript_id "hsCircRNA-132"; exon_number "6" gene_name "LARP4"; gene_biotype "protein_coding"; oId "lv:circLARP4-714-003|ce:circLARP4-2950-005|ts:circLARP4-2762-005"; tissue "lv|ce|ts";
12	ncSplice	exon	50441590	50441643	.	+	.	gene_id "ENSG00000161813"; transcript_id "hsCircRNA-132"; exon_number "7" gene_name "LARP4"; gene_biotype "protein_coding"; oId "lv:circLARP4-714-003|ce:circLARP4-2950-005|ts:circLARP4-2762-005"; tissue "lv|ce|ts";
12	ncSplice	gene	50427765	50429090	.	+	.	gene_id "ENSG00000161813"; gene_name "LARP4"; gene_source "ncSplice"; gene_biotype "protein_coding";
12	ncSplice	transcript	50427765	50429090	.	+	.	gene_id "ENSG00000161813"; transcript_id "hsCircRNA-133"; gene_name "LARP4"; gene_biotype "protein_coding"; transcript_biotype "circRNA"; oId "lv:circLARP4-717-001"; tissue "lv";
12	ncSplice	exon	50427765	50427909	.	+	.	gene_id "ENSG00000161813"; transcript_id "hsCircRNA-133"; exon_number "1" gene_name "LARP4"; gene_biotype "protein_coding"; oId "lv:circLARP4-717-001"; tissue "lv";
12	ncSplice	exon	50428935	50429090	.	+	.	gene_id "ENSG00000161813"; transcript_id "hsCircRNA-133"; exon_number "2" gene_name "LARP4"; gene_biotype "protein_coding"; oId "lv:circLARP4-717-001"; tissue "lv";
12	ncSplice	gene	56099648	56100245	.	+	.	gene_id "ENSG00000065361"; gene_name "ERBB3"; gene_source "ncSplice"; gene_biotype "protein_coding";
12	ncSplice	transcript	56099648	56100245	.	+	.	gene_id "ENSG00000065361"; transcript_id "hsCircRNA-134"; gene_name "ERBB3"; gene_biotype "protein_coding"; transcript_biotype "circRNA"; oId "lv:circERBB3-728-001"; tissue "lv";
12	ncSplice	exon	56099648	56099745	.	+	.	gene_id "ENSG00000065361"; transcript_id "hsCircRNA-134"; exon_number "1" gene_name "ERBB3"; gene_biotype "protein_coding"; oId "lv:circERBB3-728-001"; tissue "lv";
12	ncSplice	exon	56099838	56100029	.	+	.	gene_id "ENSG00000065361"; transcript_id "hsCircRNA-134"; exon_number "2" gene_name "ERBB3"; gene_biotype "protein_coding"; oId "lv:circERBB3-728-001"; tissue "lv";
12	ncSplice	exon	56100174	56100245	.	+	.	gene_id "ENSG00000065361"; transcript_id "hsCircRNA-134"; exon_number "3" gene_name "ERBB3"; gene_biotype "protein_coding"; oId "lv:circERBB3-728-001"; tissue "lv";
12	ncSplice	gene	56234824	56235700	.	+	.	gene_id "ENSG00000139540"; gene_name "SLC39A5"; gene_source "ncSplice"; gene_biotype "protein_coding";
12	ncSplice	transcript	56234824	56235700	.	+	.	gene_id "ENSG00000139540"; transcript_id "hsCircRNA-135"; gene_name "SLC39A5"; gene_biotype "protein_coding"; transcript_biotype "circRNA"; oId "lv:circSLC39A5-729-001"; tissue "lv";
12	ncSplice	exon	56234824	56234986	.	+	.	gene_id "ENSG00000139540"; transcript_id "hsCircRNA-135"; exon_number "1" gene_name "SLC39A5"; gene_biotype "protein_coding"; oId "lv:circSLC39A5-729-001"; tissue "lv";
12	ncSplice	exon	56235157	56235326	.	+	.	gene_id "ENSG00000139540"; transcript_id "hsCircRNA-135"; exon_number "2" gene_name "SLC39A5"; gene_biotype "protein_coding"; oId "lv:circSLC39A5-729-001"; tissue "lv";
12	ncSplice	exon	56235560	56235700	.	+	.	gene_id "ENSG00000139540"; transcript_id "hsCircRNA-135"; exon_number "3" gene_name "SLC39A5"; gene_biotype "protein_coding"; oId "lv:circSLC39A5-729-001"; tissue "lv";
12	ncSplice	gene	56666204	56670364	.	-	.	gene_id "ENSG00000110958"; gene_name "PTGES3"; gene_source "ncSplice"; gene_biotype "protein_coding";
12	ncSplice	transcript	56666204	56670364	.	-	.	gene_id "ENSG00000110958"; transcript_id "hsCircRNA-136"; gene_name "PTGES3"; gene_biotype "protein_coding"; transcript_biotype "circRNA"; oId "lv:circPTGES3-732-001|ts:circPTGES3-2804-001"; tissue "lv|ts";
12	ncSplice	exon	56666204	56666266	.	-	.	gene_id "ENSG00000110958"; transcript_id "hsCircRNA-136"; exon_number "1" gene_name "PTGES3"; gene_biotype "protein_coding"; oId "lv:circPTGES3-732-001|ts:circPTGES3-2804-001"; tissue "lv|ts";
12	ncSplice	exon	56670275	56670364	.	-	.	gene_id "ENSG00000110958"; transcript_id "hsCircRNA-136"; exon_number "2" gene_name "PTGES3"; gene_biotype "protein_coding"; oId "lv:circPTGES3-732-001|ts:circPTGES3-2804-001"; tissue "lv|ts";
12	ncSplice	gene	56670275	56673065	.	-	.	gene_id "ENSG00000110958"; gene_name "PTGES3"; gene_source "ncSplice"; gene_biotype "protein_coding";
12	ncSplice	transcript	56670275	56673065	.	-	.	gene_id "ENSG00000110958"; transcript_id "hsCircRNA-137"; gene_name "PTGES3"; gene_biotype "protein_coding"; transcript_biotype "circRNA"; oId "lv:circPTGES3-733-001"; tissue "lv";
12	ncSplice	exon	56670275	56670364	.	-	.	gene_id "ENSG00000110958"; transcript_id "hsCircRNA-137"; exon_number "1" gene_name "PTGES3"; gene_biotype "protein_coding"; oId "lv:circPTGES3-733-001"; tissue "lv";
12	ncSplice	exon	56671749	56671847	.	-	.	gene_id "ENSG00000110958"; transcript_id "hsCircRNA-137"; exon_number "2" gene_name "PTGES3"; gene_biotype "protein_coding"; oId "lv:circPTGES3-733-001"; tissue "lv";
12	ncSplice	exon	56672740	56672809	.	-	.	gene_id "ENSG00000110958"; transcript_id "hsCircRNA-137"; exon_number "3" gene_name "PTGES3"; gene_biotype "protein_coding"; oId "lv:circPTGES3-733-001"; tissue "lv";
12	ncSplice	exon	56672952	56673065	.	-	.	gene_id "ENSG00000110958"; transcript_id "hsCircRNA-137"; exon_number "4" gene_name "PTGES3"; gene_biotype "protein_coding"; oId "lv:circPTGES3-733-001"; tissue "lv";
12	ncSplice	gene	69251129	69262562	.	+	.	gene_id "ENSG00000111605"; gene_name "CPSF6"; gene_source "ncSplice"; gene_biotype "protein_coding";
12	ncSplice	transcript	69251129	69262562	.	+	.	gene_id "ENSG00000111605"; transcript_id "hsCircRNA-138"; gene_name "CPSF6"; gene_biotype "protein_coding"; transcript_biotype "circRNA"; oId "lv:circCPSF6-745-003|ce:circCPSF6-3099-022|ts:circCPSF6-2864-030"; tissue "lv|ce|ts";
12	ncSplice	exon	69251129	69251338	.	+	.	gene_id "ENSG00000111605"; transcript_id "hsCircRNA-138"; exon_number "1" gene_name "CPSF6"; gene_biotype "protein_coding"; oId "lv:circCPSF6-745-003|ce:circCPSF6-3099-022|ts:circCPSF6-2864-030"; tissue "lv|ce|ts";
12	ncSplice	exon	69253051	69253154	.	+	.	gene_id "ENSG00000111605"; transcript_id "hsCircRNA-138"; exon_number "2" gene_name "CPSF6"; gene_biotype "protein_coding"; oId "lv:circCPSF6-745-003|ce:circCPSF6-3099-022|ts:circCPSF6-2864-030"; tissue "lv|ce|ts";
12	ncSplice	exon	69256697	69256842	.	+	.	gene_id "ENSG00000111605"; transcript_id "hsCircRNA-138"; exon_number "3" gene_name "CPSF6"; gene_biotype "protein_coding"; oId "lv:circCPSF6-745-003|ce:circCPSF6-3099-022|ts:circCPSF6-2864-030"; tissue "lv|ce|ts";
12	ncSplice	exon	69257732	69257905	.	+	.	gene_id "ENSG00000111605"; transcript_id "hsCircRNA-138"; exon_number "4" gene_name "CPSF6"; gene_biotype "protein_coding"; oId "lv:circCPSF6-745-003|ce:circCPSF6-3099-022|ts:circCPSF6-2864-030"; tissue "lv|ce|ts";
12	ncSplice	exon	69258590	69259094	.	+	.	gene_id "ENSG00000111605"; transcript_id "hsCircRNA-138"; exon_number "5" gene_name "CPSF6"; gene_biotype "protein_coding"; oId "lv:circCPSF6-745-003|ce:circCPSF6-3099-022|ts:circCPSF6-2864-030"; tissue "lv|ce|ts";
12	ncSplice	exon	69259428	69259543	.	+	.	gene_id "ENSG00000111605"; transcript_id "hsCircRNA-138"; exon_number "6" gene_name "CPSF6"; gene_biotype "protein_coding"; oId "lv:circCPSF6-745-003|ce:circCPSF6-3099-022|ts:circCPSF6-2864-030"; tissue "lv|ce|ts";
12	ncSplice	exon	69260044	69260197	.	+	.	gene_id "ENSG00000111605"; transcript_id "hsCircRNA-138"; exon_number "7" gene_name "CPSF6"; gene_biotype "protein_coding"; oId "lv:circCPSF6-745-003|ce:circCPSF6-3099-022|ts:circCPSF6-2864-030"; tissue "lv|ce|ts";
12	ncSplice	exon	69262373	69262562	.	+	.	gene_id "ENSG00000111605"; transcript_id "hsCircRNA-138"; exon_number "8" gene_name "CPSF6"; gene_biotype "protein_coding"; oId "lv:circCPSF6-745-003|ce:circCPSF6-3099-022|ts:circCPSF6-2864-030"; tissue "lv|ce|ts";
12	ncSplice	gene	69589485	69592159	.	+	.	gene_id "ENSG00000166226"; gene_name "CCT2"; gene_source "ncSplice"; gene_biotype "protein_coding";
12	ncSplice	transcript	69589485	69592159	.	+	.	gene_id "ENSG00000166226"; transcript_id "hsCircRNA-139"; gene_name "CCT2"; gene_biotype "protein_coding"; transcript_biotype "circRNA"; oId "lv:circCCT2-746-001|ce:circCCT2-3107-001"; tissue "lv|ce";
12	ncSplice	exon	69589485	69589687	.	+	.	gene_id "ENSG00000166226"; transcript_id "hsCircRNA-139"; exon_number "1" gene_name "CCT2"; gene_biotype "protein_coding"; oId "lv:circCCT2-746-001|ce:circCCT2-3107-001"; tissue "lv|ce";
12	ncSplice	exon	69592059	69592159	.	+	.	gene_id "ENSG00000166226"; transcript_id "hsCircRNA-139"; exon_number "2" gene_name "CCT2"; gene_biotype "protein_coding"; oId "lv:circCCT2-746-001|ce:circCCT2-3107-001"; tissue "lv|ce";
12	ncSplice	gene	69800209	69801721	.	+	.	gene_id "ENSG00000127328"; gene_name "RAB3IP"; gene_source "ncSplice"; gene_biotype "protein_coding";
12	ncSplice	transcript	69800209	69801721	.	+	.	gene_id "ENSG00000127328"; transcript_id "hsCircRNA-140"; gene_name "RAB3IP"; gene_biotype "protein_coding"; transcript_biotype "circRNA"; oId "lv:circRAB3IP-748-001|ce:circRAB3IP-3115-001|ts:circRAB3IP-2869-001"; tissue "lv|ce|ts";
12	ncSplice	exon	69800209	69800337	.	+	.	gene_id "ENSG00000127328"; transcript_id "hsCircRNA-140"; exon_number "1" gene_name "RAB3IP"; gene_biotype "protein_coding"; oId "lv:circRAB3IP-748-001|ce:circRAB3IP-3115-001|ts:circRAB3IP-2869-001"; tissue "lv|ce|ts";
12	ncSplice	exon	69801609	69801721	.	+	.	gene_id "ENSG00000127328"; transcript_id "hsCircRNA-140"; exon_number "2" gene_name "RAB3IP"; gene_biotype "protein_coding"; oId "lv:circRAB3IP-748-001|ce:circRAB3IP-3115-001|ts:circRAB3IP-2869-001"; tissue "lv|ce|ts";
12	ncSplice	gene	70278132	70311017	.	+	.	gene_id "ENSG00000111596"; gene_name "CNOT2"; gene_source "ncSplice"; gene_biotype "protein_coding";
12	ncSplice	transcript	70278132	70311017	.	+	.	gene_id "ENSG00000111596"; transcript_id "hsCircRNA-141"; gene_name "CNOT2"; gene_biotype "protein_coding"; transcript_biotype "circRNA"; oId "lv:circCNOT2-749-008|ce:circCNOT2-3118-030|ts:circCNOT2-2872-021"; tissue "lv|ce|ts";
12	ncSplice	exon	70278132	70278274	.	+	.	gene_id "ENSG00000111596"; transcript_id "hsCircRNA-141"; exon_number "1" gene_name "CNOT2"; gene_biotype "protein_coding"; oId "lv:circCNOT2-749-008|ce:circCNOT2-3118-030|ts:circCNOT2-2872-021"; tissue "lv|ce|ts";
12	ncSplice	exon	70294237	70294294	.	+	.	gene_id "ENSG00000111596"; transcript_id "hsCircRNA-141"; exon_number "2" gene_name "CNOT2"; gene_biotype "protein_coding"; oId "lv:circCNOT2-749-008|ce:circCNOT2-3118-030|ts:circCNOT2-2872-021"; tissue "lv|ce|ts";
12	ncSplice	exon	70310895	70311017	.	+	.	gene_id "ENSG00000111596"; transcript_id "hsCircRNA-141"; exon_number "3" gene_name "CNOT2"; gene_biotype "protein_coding"; oId "lv:circCNOT2-749-008|ce:circCNOT2-3118-030|ts:circCNOT2-2872-021"; tissue "lv|ce|ts";
1	ncSplice	gene	30992390	30995220	.	-	.	gene_id "ENSG00000134644"; gene_name "PUM1"; gene_source "ncSplice"; gene_biotype "protein_coding";
1	ncSplice	transcript	30992390	30995220	.	-	.	gene_id "ENSG00000134644"; transcript_id "hsCircRNA-142"; gene_name "PUM1"; gene_biotype "protein_coding"; transcript_biotype "circRNA"; oId "lv:circPUM1-768-001|ce:circPUM1-3299-001|ts:circPUM1-3044-001"; tissue "lv|ce|ts";
1	ncSplice	exon	30992390	30992660	.	-	.	gene_id "ENSG00000134644"; transcript_id "hsCircRNA-142"; exon_number "1" gene_name "PUM1"; gene_biotype "protein_coding"; oId "lv:circPUM1-768-001|ce:circPUM1-3299-001|ts:circPUM1-3044-001"; tissue "lv|ce|ts";
1	ncSplice	exon	30995054	30995220	.	-	.	gene_id "ENSG00000134644"; transcript_id "hsCircRNA-142"; exon_number "2" gene_name "PUM1"; gene_biotype "protein_coding"; oId "lv:circPUM1-768-001|ce:circPUM1-3299-001|ts:circPUM1-3044-001"; tissue "lv|ce|ts";
13	ncSplice	gene	100257595	100273346	.	+	.	gene_id "ENSG00000175198"; gene_name "PCCA"; gene_source "ncSplice"; gene_biotype "protein_coding";
13	ncSplice	transcript	100257595	100273346	.	+	.	gene_id "ENSG00000175198"; transcript_id "hsCircRNA-143"; gene_name "PCCA"; gene_biotype "protein_coding"; transcript_biotype "circRNA"; oId "lv:circPCCA-774-001|ce:circPCCA-3307-001"; tissue "lv|ce";
13	ncSplice	exon	100257595	100257673	.	+	.	gene_id "ENSG00000175198"; transcript_id "hsCircRNA-143"; exon_number "1" gene_name "PCCA"; gene_biotype "protein_coding"; oId "lv:circPCCA-774-001|ce:circPCCA-3307-001"; tissue "lv|ce";
13	ncSplice	exon	100262729	100262831	.	+	.	gene_id "ENSG00000175198"; transcript_id "hsCircRNA-143"; exon_number "2" gene_name "PCCA"; gene_biotype "protein_coding"; oId "lv:circPCCA-774-001|ce:circPCCA-3307-001"; tissue "lv|ce";
13	ncSplice	exon	100268689	100268783	.	+	.	gene_id "ENSG00000175198"; transcript_id "hsCircRNA-143"; exon_number "3" gene_name "PCCA"; gene_biotype "protein_coding"; oId "lv:circPCCA-774-001|ce:circPCCA-3307-001"; tissue "lv|ce";
13	ncSplice	exon	100273196	100273346	.	+	.	gene_id "ENSG00000175198"; transcript_id "hsCircRNA-143"; exon_number "4" gene_name "PCCA"; gene_biotype "protein_coding"; oId "lv:circPCCA-774-001|ce:circPCCA-3307-001"; tissue "lv|ce";
13	ncSplice	gene	100301460	100309908	.	+	.	gene_id "ENSG00000175198"; gene_name "PCCA"; gene_source "ncSplice"; gene_biotype "protein_coding";
13	ncSplice	transcript	100301460	100309908	.	+	.	gene_id "ENSG00000175198"; transcript_id "hsCircRNA-144"; gene_name "PCCA"; gene_biotype "protein_coding"; transcript_biotype "circRNA"; oId "lv:circPCCA-778-001|ce:circPCCA-3314-002"; tissue "lv|ce";
13	ncSplice	exon	100301460	100301603	.	+	.	gene_id "ENSG00000175198"; transcript_id "hsCircRNA-144"; exon_number "1" gene_name "PCCA"; gene_biotype "protein_coding"; oId "lv:circPCCA-778-001|ce:circPCCA-3314-002"; tissue "lv|ce";
13	ncSplice	exon	100302924	100302998	.	+	.	gene_id "ENSG00000175198"; transcript_id "hsCircRNA-144"; exon_number "2" gene_name "PCCA"; gene_biotype "protein_coding"; oId "lv:circPCCA-778-001|ce:circPCCA-3314-002"; tissue "lv|ce";
13	ncSplice	exon	100307192	100307260	.	+	.	gene_id "ENSG00000175198"; transcript_id "hsCircRNA-144"; exon_number "3" gene_name "PCCA"; gene_biotype "protein_coding"; oId "lv:circPCCA-778-001|ce:circPCCA-3314-002"; tissue "lv|ce";
13	ncSplice	exon	100309833	100309908	.	+	.	gene_id "ENSG00000175198"; transcript_id "hsCircRNA-144"; exon_number "4" gene_name "PCCA"; gene_biotype "protein_coding"; oId "lv:circPCCA-778-001|ce:circPCCA-3314-002"; tissue "lv|ce";
13	ncSplice	gene	100301460	100368574	.	+	.	gene_id "ENSG00000175198"; gene_name "PCCA"; gene_source "ncSplice"; gene_biotype "protein_coding";
13	ncSplice	transcript	100301460	100368574	.	+	.	gene_id "ENSG00000175198"; transcript_id "hsCircRNA-145"; gene_name "PCCA"; gene_biotype "protein_coding"; transcript_biotype "circRNA"; oId "lv:circPCCA-781-001|ce:circPCCA-3317-150"; tissue "lv|ce";
13	ncSplice	exon	100301460	100301603	.	+	.	gene_id "ENSG00000175198"; transcript_id "hsCircRNA-145"; exon_number "1" gene_name "PCCA"; gene_biotype "protein_coding"; oId "lv:circPCCA-781-001|ce:circPCCA-3317-150"; tissue "lv|ce";
13	ncSplice	exon	100302924	100302998	.	+	.	gene_id "ENSG00000175198"; transcript_id "hsCircRNA-145"; exon_number "2" gene_name "PCCA"; gene_biotype "protein_coding"; oId "lv:circPCCA-781-001|ce:circPCCA-3317-150"; tissue "lv|ce";
13	ncSplice	exon	100307192	100307260	.	+	.	gene_id "ENSG00000175198"; transcript_id "hsCircRNA-145"; exon_number "3" gene_name "PCCA"; gene_biotype "protein_coding"; oId "lv:circPCCA-781-001|ce:circPCCA-3317-150"; tissue "lv|ce";
13	ncSplice	exon	100309833	100309908	.	+	.	gene_id "ENSG00000175198"; transcript_id "hsCircRNA-145"; exon_number "4" gene_name "PCCA"; gene_biotype "protein_coding"; oId "lv:circPCCA-781-001|ce:circPCCA-3317-150"; tissue "lv|ce";
13	ncSplice	exon	100330561	100330671	.	+	.	gene_id "ENSG00000175198"; transcript_id "hsCircRNA-145"; exon_number "5" gene_name "PCCA"; gene_biotype "protein_coding"; oId "lv:circPCCA-781-001|ce:circPCCA-3317-150"; tissue "lv|ce";
13	ncSplice	exon	100340157	100340259	.	+	.	gene_id "ENSG00000175198"; transcript_id "hsCircRNA-145"; exon_number "6" gene_name "PCCA"; gene_biotype "protein_coding"; oId "lv:circPCCA-781-001|ce:circPCCA-3317-150"; tissue "lv|ce";
13	ncSplice	exon	100368472	100368574	.	+	.	gene_id "ENSG00000175198"; transcript_id "hsCircRNA-145"; exon_number "7" gene_name "PCCA"; gene_biotype "protein_coding"; oId "lv:circPCCA-781-001|ce:circPCCA-3317-150"; tissue "lv|ce";
13	ncSplice	gene	26400453	26401624	.	+	.	gene_id "ENSG00000132964"; gene_name "CDK8"; gene_source "ncSplice"; gene_biotype "protein_coding";
13	ncSplice	transcript	26400453	26401624	.	+	.	gene_id "ENSG00000132964"; transcript_id "hsCircRNA-146"; gene_name "CDK8"; gene_biotype "protein_coding"; transcript_biotype "circRNA"; oId "lv:circCDK8-802-001|ts:circCDK8-3232-001"; tissue "lv|ts";
13	ncSplice	exon	26400453	26400550	.	+	.	gene_id "ENSG00000132964"; transcript_id "hsCircRNA-146"; exon_number "1" gene_name "CDK8"; gene_biotype "protein_coding"; oId "lv:circCDK8-802-001|ts:circCDK8-3232-001"; tissue "lv|ts";
13	ncSplice	exon	26401269	26401347	.	+	.	gene_id "ENSG00000132964"; transcript_id "hsCircRNA-146"; exon_number "2" gene_name "CDK8"; gene_biotype "protein_coding"; oId "lv:circCDK8-802-001|ts:circCDK8-3232-001"; tissue "lv|ts";
13	ncSplice	exon	26401469	26401624	.	+	.	gene_id "ENSG00000132964"; transcript_id "hsCircRNA-146"; exon_number "3" gene_name "CDK8"; gene_biotype "protein_coding"; oId "lv:circCDK8-802-001|ts:circCDK8-3232-001"; tissue "lv|ts";
13	ncSplice	gene	32517857	32527532	.	-	.	gene_id "ENSG00000244754"; gene_name "N4BP2L2"; gene_source "ncSplice"; gene_biotype "protein_coding";
13	ncSplice	transcript	32517857	32527532	.	-	.	gene_id "ENSG00000244754"; transcript_id "hsCircRNA-147"; gene_name "N4BP2L2"; gene_biotype "protein_coding"; transcript_biotype "circRNA"; oId "lv:circN4BP2L2-809-001|ts:circN4BP2L2-3283-002"; tissue "lv|ts";
13	ncSplice	exon	32517857	32518003	.	-	.	gene_id "ENSG00000244754"; transcript_id "hsCircRNA-147"; exon_number "1" gene_name "N4BP2L2"; gene_biotype "protein_coding"; oId "lv:circN4BP2L2-809-001|ts:circN4BP2L2-3283-002"; tissue "lv|ts";
13	ncSplice	exon	32521373	32521449	.	-	.	gene_id "ENSG00000244754"; transcript_id "hsCircRNA-147"; exon_number "2" gene_name "N4BP2L2"; gene_biotype "protein_coding"; oId "lv:circN4BP2L2-809-001|ts:circN4BP2L2-3283-002"; tissue "lv|ts";
13	ncSplice	exon	32522182	32522270	.	-	.	gene_id "ENSG00000244754"; transcript_id "hsCircRNA-147"; exon_number "3" gene_name "N4BP2L2"; gene_biotype "protein_coding"; oId "lv:circN4BP2L2-809-001|ts:circN4BP2L2-3283-002"; tissue "lv|ts";
13	ncSplice	exon	32527458	32527532	.	-	.	gene_id "ENSG00000244754"; transcript_id "hsCircRNA-147"; exon_number "4" gene_name "N4BP2L2"; gene_biotype "protein_coding"; oId "lv:circN4BP2L2-809-001|ts:circN4BP2L2-3283-002"; tissue "lv|ts";
1	ncSplice	gene	33294937	33295305	.	+	.	gene_id "ENSG00000160094"; gene_name "ZNF362"; gene_source "ncSplice"; gene_biotype "protein_coding";
1	ncSplice	transcript	33294937	33295305	.	+	.	gene_id "ENSG00000160094"; transcript_id "hsCircRNA-148"; gene_name "ZNF362"; gene_biotype "protein_coding"; transcript_biotype "circRNA"; oId "lv:circZNF362-811-001"; tissue "lv";
1	ncSplice	exon	33294937	33295015	.	+	.	gene_id "ENSG00000160094"; transcript_id "hsCircRNA-148"; exon_number "1" gene_name "ZNF362"; gene_biotype "protein_coding"; oId "lv:circZNF362-811-001"; tissue "lv";
1	ncSplice	exon	33295147	33295305	.	+	.	gene_id "ENSG00000160094"; transcript_id "hsCircRNA-148"; exon_number "2" gene_name "ZNF362"; gene_biotype "protein_coding"; oId "lv:circZNF362-811-001"; tissue "lv";
13	ncSplice	gene	40940921	40943925	.	-	.	gene_id "ENSG00000120690"; gene_name "ELF1"; gene_source "ncSplice"; gene_biotype "protein_coding";
13	ncSplice	transcript	40940921	40943925	.	-	.	gene_id "ENSG00000120690"; transcript_id "hsCircRNA-149"; gene_name "ELF1"; gene_biotype "protein_coding"; transcript_biotype "circRNA"; oId "lv:circELF1-813-001"; tissue "lv";
13	ncSplice	exon	40940921	40941370	.	-	.	gene_id "ENSG00000120690"; transcript_id "hsCircRNA-149"; exon_number "1" gene_name "ELF1"; gene_biotype "protein_coding"; oId "lv:circELF1-813-001"; tissue "lv";
13	ncSplice	exon	40942952	40943144	.	-	.	gene_id "ENSG00000120690"; transcript_id "hsCircRNA-149"; exon_number "2" gene_name "ELF1"; gene_biotype "protein_coding"; oId "lv:circELF1-813-001"; tissue "lv";
13	ncSplice	exon	40943842	40943925	.	-	.	gene_id "ENSG00000120690"; transcript_id "hsCircRNA-149"; exon_number "3" gene_name "ELF1"; gene_biotype "protein_coding"; oId "lv:circELF1-813-001"; tissue "lv";
13	ncSplice	gene	41811225	41819386	.	-	.	gene_id "ENSG00000102763"; gene_name "VWA8"; gene_source "ncSplice"; gene_biotype "protein_coding";
13	ncSplice	transcript	41811225	41819386	.	-	.	gene_id "ENSG00000102763"; transcript_id "hsCircRNA-150"; gene_name "VWA8"; gene_biotype "protein_coding"; transcript_biotype "circRNA"; oId "lv:circVWA8-818-001|ce:circVWA8-3609-002|ts:circVWA8-3361-001"; tissue "lv|ce|ts";
13	ncSplice	exon	41811225	41811340	.	-	.	gene_id "ENSG00000102763"; transcript_id "hsCircRNA-150"; exon_number "1" gene_name "VWA8"; gene_biotype "protein_coding"; oId "lv:circVWA8-818-001|ce:circVWA8-3609-002|ts:circVWA8-3361-001"; tissue "lv|ce|ts";
13	ncSplice	exon	41816698	41816775	.	-	.	gene_id "ENSG00000102763"; transcript_id "hsCircRNA-150"; exon_number "2" gene_name "VWA8"; gene_biotype "protein_coding"; oId "lv:circVWA8-818-001|ce:circVWA8-3609-002|ts:circVWA8-3361-001"; tissue "lv|ce|ts";
13	ncSplice	exon	41819218	41819386	.	-	.	gene_id "ENSG00000102763"; transcript_id "hsCircRNA-150"; exon_number "3" gene_name "VWA8"; gene_biotype "protein_coding"; oId "lv:circVWA8-818-001|ce:circVWA8-3609-002|ts:circVWA8-3361-001"; tissue "lv|ce|ts";
13	ncSplice	gene	41865736	41887361	.	-	.	gene_id "ENSG00000102763"; gene_name "VWA8"; gene_source "ncSplice"; gene_biotype "protein_coding";
13	ncSplice	transcript	41865736	41887361	.	-	.	gene_id "ENSG00000102763"; transcript_id "hsCircRNA-151"; gene_name "VWA8"; gene_biotype "protein_coding"; transcript_biotype "circRNA"; oId "lv:circVWA8-821-001|ce:circVWA8-3616-002"; tissue "lv|ce";
13	ncSplice	exon	41865736	41865813	.	-	.	gene_id "ENSG00000102763"; transcript_id "hsCircRNA-151"; exon_number "1" gene_name "VWA8"; gene_biotype "protein_coding"; oId "lv:circVWA8-821-001|ce:circVWA8-3616-002"; tissue "lv|ce";
13	ncSplice	exon	41865902	41866036	.	-	.	gene_id "ENSG00000102763"; transcript_id "hsCircRNA-151"; exon_number "2" gene_name "VWA8"; gene_biotype "protein_coding"; oId "lv:circVWA8-821-001|ce:circVWA8-3616-002"; tissue "lv|ce";
13	ncSplice	exon	41868346	41868477	.	-	.	gene_id "ENSG00000102763"; transcript_id "hsCircRNA-151"; exon_number "3" gene_name "VWA8"; gene_biotype "protein_coding"; oId "lv:circVWA8-821-001|ce:circVWA8-3616-002"; tissue "lv|ce";
13	ncSplice	exon	41883387	41883491	.	-	.	gene_id "ENSG00000102763"; transcript_id "hsCircRNA-151"; exon_number "4" gene_name "VWA8"; gene_biotype "protein_coding"; oId "lv:circVWA8-821-001|ce:circVWA8-3616-002"; tissue "lv|ce";
13	ncSplice	exon	41885920	41886028	.	-	.	gene_id "ENSG00000102763"; transcript_id "hsCircRNA-151"; exon_number "5" gene_name "VWA8"; gene_biotype "protein_coding"; oId "lv:circVWA8-821-001|ce:circVWA8-3616-002"; tissue "lv|ce";
13	ncSplice	exon	41886781	41886830	.	-	.	gene_id "ENSG00000102763"; transcript_id "hsCircRNA-151"; exon_number "6" gene_name "VWA8"; gene_biotype "protein_coding"; oId "lv:circVWA8-821-001|ce:circVWA8-3616-002"; tissue "lv|ce";
13	ncSplice	exon	41887197	41887361	.	-	.	gene_id "ENSG00000102763"; transcript_id "hsCircRNA-151"; exon_number "7" gene_name "VWA8"; gene_biotype "protein_coding"; oId "lv:circVWA8-821-001|ce:circVWA8-3616-002"; tissue "lv|ce";
13	ncSplice	gene	42917541	42970670	.	-	.	gene_id "ENSG00000133106"; gene_name "EPSTI1"; gene_source "ncSplice"; gene_biotype "protein_coding";
13	ncSplice	transcript	42917541	42970670	.	-	.	gene_id "ENSG00000133106"; transcript_id "hsCircRNA-152"; gene_name "EPSTI1"; gene_biotype "protein_coding"; transcript_biotype "circRNA"; oId "lv:circEPSTI1-824-004"; tissue "lv";
13	ncSplice	exon	42917541	42917624	.	-	.	gene_id "ENSG00000133106"; transcript_id "hsCircRNA-152"; exon_number "1" gene_name "EPSTI1"; gene_biotype "protein_coding"; oId "lv:circEPSTI1-824-004"; tissue "lv";
13	ncSplice	exon	42926391	42926429	.	-	.	gene_id "ENSG00000133106"; transcript_id "hsCircRNA-152"; exon_number "2" gene_name "EPSTI1"; gene_biotype "protein_coding"; oId "lv:circEPSTI1-824-004"; tissue "lv";
13	ncSplice	exon	42953948	42954021	.	-	.	gene_id "ENSG00000133106"; transcript_id "hsCircRNA-152"; exon_number "3" gene_name "EPSTI1"; gene_biotype "protein_coding"; oId "lv:circEPSTI1-824-004"; tissue "lv";
13	ncSplice	exon	42963255	42963338	.	-	.	gene_id "ENSG00000133106"; transcript_id "hsCircRNA-152"; exon_number "4" gene_name "EPSTI1"; gene_biotype "protein_coding"; oId "lv:circEPSTI1-824-004"; tissue "lv";
13	ncSplice	exon	42964066	42964139	.	-	.	gene_id "ENSG00000133106"; transcript_id "hsCircRNA-152"; exon_number "5" gene_name "EPSTI1"; gene_biotype "protein_coding"; oId "lv:circEPSTI1-824-004"; tissue "lv";
13	ncSplice	exon	42969094	42969177	.	-	.	gene_id "ENSG00000133106"; transcript_id "hsCircRNA-152"; exon_number "6" gene_name "EPSTI1"; gene_biotype "protein_coding"; oId "lv:circEPSTI1-824-004"; tissue "lv";
13	ncSplice	exon	42970612	42970670	.	-	.	gene_id "ENSG00000133106"; transcript_id "hsCircRNA-152"; exon_number "7" gene_name "EPSTI1"; gene_biotype "protein_coding"; oId "lv:circEPSTI1-824-004"; tissue "lv";
13	ncSplice	gene	42953948	42970670	.	-	.	gene_id "ENSG00000133106"; gene_name "EPSTI1"; gene_source "ncSplice"; gene_biotype "protein_coding";
13	ncSplice	transcript	42953948	42970670	.	-	.	gene_id "ENSG00000133106"; transcript_id "hsCircRNA-153"; gene_name "EPSTI1"; gene_biotype "protein_coding"; transcript_biotype "circRNA"; oId "lv:circEPSTI1-826-002"; tissue "lv";
13	ncSplice	exon	42953948	42954021	.	-	.	gene_id "ENSG00000133106"; transcript_id "hsCircRNA-153"; exon_number "1" gene_name "EPSTI1"; gene_biotype "protein_coding"; oId "lv:circEPSTI1-826-002"; tissue "lv";
13	ncSplice	exon	42963255	42963338	.	-	.	gene_id "ENSG00000133106"; transcript_id "hsCircRNA-153"; exon_number "2" gene_name "EPSTI1"; gene_biotype "protein_coding"; oId "lv:circEPSTI1-826-002"; tissue "lv";
13	ncSplice	exon	42964066	42964139	.	-	.	gene_id "ENSG00000133106"; transcript_id "hsCircRNA-153"; exon_number "3" gene_name "EPSTI1"; gene_biotype "protein_coding"; oId "lv:circEPSTI1-826-002"; tissue "lv";
13	ncSplice	exon	42969094	42969177	.	-	.	gene_id "ENSG00000133106"; transcript_id "hsCircRNA-153"; exon_number "4" gene_name "EPSTI1"; gene_biotype "protein_coding"; oId "lv:circEPSTI1-826-002"; tissue "lv";
13	ncSplice	exon	42970612	42970670	.	-	.	gene_id "ENSG00000133106"; transcript_id "hsCircRNA-153"; exon_number "5" gene_name "EPSTI1"; gene_biotype "protein_coding"; oId "lv:circEPSTI1-826-002"; tissue "lv";
13	ncSplice	gene	45985297	46020557	.	-	.	gene_id "ENSG00000123200"; gene_name "ZC3H13"; gene_source "ncSplice"; gene_biotype "protein_coding";
13	ncSplice	transcript	45985297	46020557	.	-	.	gene_id "ENSG00000123200"; transcript_id "hsCircRNA-154"; gene_name "ZC3H13"; gene_biotype "protein_coding"; transcript_biotype "circRNA"; oId "lv:circZC3H13-831-001"; tissue "lv";
13	ncSplice	exon	45985297	45985761	.	-	.	gene_id "ENSG00000123200"; transcript_id "hsCircRNA-154"; exon_number "1" gene_name "ZC3H13"; gene_biotype "protein_coding"; oId "lv:circZC3H13-831-001"; tissue "lv";
13	ncSplice	exon	45988787	45989097	.	-	.	gene_id "ENSG00000123200"; transcript_id "hsCircRNA-154"; exon_number "2" gene_name "ZC3H13"; gene_biotype "protein_coding"; oId "lv:circZC3H13-831-001"; tissue "lv";
13	ncSplice	exon	46003139	46020557	.	-	.	gene_id "ENSG00000123200"; transcript_id "hsCircRNA-154"; exon_number "3" gene_name "ZC3H13"; gene_biotype "protein_coding"; oId "lv:circZC3H13-831-001"; tissue "lv";
13	ncSplice	gene	46723221	46733998	.	+	.	gene_id "ENSG00000136141"; gene_name "LRCH1"; gene_source "ncSplice"; gene_biotype "protein_coding";
13	ncSplice	transcript	46723221	46733998	.	+	.	gene_id "ENSG00000136141"; transcript_id "hsCircRNA-155"; gene_name "LRCH1"; gene_biotype "protein_coding"; transcript_biotype "circRNA"; oId "lv:circLRCH1-833-001|ce:circLRCH1-3646-001|ts:circLRCH1-3394-001"; tissue "lv|ce|ts";
13	ncSplice	exon	46723221	46723330	.	+	.	gene_id "ENSG00000136141"; transcript_id "hsCircRNA-155"; exon_number "1" gene_name "LRCH1"; gene_biotype "protein_coding"; oId "lv:circLRCH1-833-001|ce:circLRCH1-3646-001|ts:circLRCH1-3394-001"; tissue "lv|ce|ts";
13	ncSplice	exon	46728847	46728984	.	+	.	gene_id "ENSG00000136141"; transcript_id "hsCircRNA-155"; exon_number "2" gene_name "LRCH1"; gene_biotype "protein_coding"; oId "lv:circLRCH1-833-001|ce:circLRCH1-3646-001|ts:circLRCH1-3394-001"; tissue "lv|ce|ts";
13	ncSplice	exon	46733921	46733998	.	+	.	gene_id "ENSG00000136141"; transcript_id "hsCircRNA-155"; exon_number "3" gene_name "LRCH1"; gene_biotype "protein_coding"; oId "lv:circLRCH1-833-001|ce:circLRCH1-3646-001|ts:circLRCH1-3394-001"; tissue "lv|ce|ts";
13	ncSplice	gene	49167244	49175541	.	+	.	gene_id "ENSG00000102531"; gene_name "FNDC3A"; gene_source "ncSplice"; gene_biotype "protein_coding";
13	ncSplice	transcript	49167244	49175541	.	+	.	gene_id "ENSG00000102531"; transcript_id "hsCircRNA-156"; gene_name "FNDC3A"; gene_biotype "protein_coding"; transcript_biotype "circRNA"; oId "lv:circFNDC3A-836-001"; tissue "lv";
13	ncSplice	exon	49167244	49168751	.	+	.	gene_id "ENSG00000102531"; transcript_id "hsCircRNA-156"; exon_number "1" gene_name "FNDC3A"; gene_biotype "protein_coding"; oId "lv:circFNDC3A-836-001"; tissue "lv";
13	ncSplice	exon	49172043	49174559	.	+	.	gene_id "ENSG00000102531"; transcript_id "hsCircRNA-156"; exon_number "2" gene_name "FNDC3A"; gene_biotype "protein_coding"; oId "lv:circFNDC3A-836-001"; tissue "lv";
13	ncSplice	exon	49175367	49175541	.	+	.	gene_id "ENSG00000102531"; transcript_id "hsCircRNA-156"; exon_number "3" gene_name "FNDC3A"; gene_biotype "protein_coding"; oId "lv:circFNDC3A-836-001"; tissue "lv";
1	ncSplice	gene	35358925	35361789	.	+	.	gene_id "ENSG00000146463"; gene_name "ZMYM4"; gene_source "ncSplice"; gene_biotype "protein_coding";
1	ncSplice	transcript	35358925	35361789	.	+	.	gene_id "ENSG00000146463"; transcript_id "hsCircRNA-157"; gene_name "ZMYM4"; gene_biotype "protein_coding"; transcript_biotype "circRNA"; oId "lv:circZMYM4-842-001|ce:circZMYM4-3695-002|ts:circZMYM4-3462-004"; tissue "lv|ce|ts";
1	ncSplice	exon	35358925	35359446	.	+	.	gene_id "ENSG00000146463"; transcript_id "hsCircRNA-157"; exon_number "1" gene_name "ZMYM4"; gene_biotype "protein_coding"; oId "lv:circZMYM4-842-001|ce:circZMYM4-3695-002|ts:circZMYM4-3462-004"; tissue "lv|ce|ts";
1	ncSplice	exon	35361194	35361255	.	+	.	gene_id "ENSG00000146463"; transcript_id "hsCircRNA-157"; exon_number "2" gene_name "ZMYM4"; gene_biotype "protein_coding"; oId "lv:circZMYM4-842-001|ce:circZMYM4-3695-002|ts:circZMYM4-3462-004"; tissue "lv|ce|ts";
1	ncSplice	exon	35361619	35361789	.	+	.	gene_id "ENSG00000146463"; transcript_id "hsCircRNA-157"; exon_number "3" gene_name "ZMYM4"; gene_biotype "protein_coding"; oId "lv:circZMYM4-842-001|ce:circZMYM4-3695-002|ts:circZMYM4-3462-004"; tissue "lv|ce|ts";
1	ncSplice	gene	35381259	35389082	.	+	.	gene_id "ENSG00000146463"; gene_name "ZMYM4"; gene_source "ncSplice"; gene_biotype "protein_coding";
1	ncSplice	transcript	35381259	35389082	.	+	.	gene_id "ENSG00000146463"; transcript_id "hsCircRNA-158"; gene_name "ZMYM4"; gene_biotype "protein_coding"; transcript_biotype "circRNA"; oId "lv:circZMYM4-844-001"; tissue "lv";
1	ncSplice	exon	35381259	35381433	.	+	.	gene_id "ENSG00000146463"; transcript_id "hsCircRNA-158"; exon_number "1" gene_name "ZMYM4"; gene_biotype "protein_coding"; oId "lv:circZMYM4-844-001"; tissue "lv";
1	ncSplice	exon	35381546	35386189	.	+	.	gene_id "ENSG00000146463"; transcript_id "hsCircRNA-158"; exon_number "2" gene_name "ZMYM4"; gene_biotype "protein_coding"; oId "lv:circZMYM4-844-001"; tissue "lv";
1	ncSplice	exon	35387003	35387604	.	+	.	gene_id "ENSG00000146463"; transcript_id "hsCircRNA-158"; exon_number "3" gene_name "ZMYM4"; gene_biotype "protein_coding"; oId "lv:circZMYM4-844-001"; tissue "lv";
1	ncSplice	exon	35388910	35389082	.	+	.	gene_id "ENSG00000146463"; transcript_id "hsCircRNA-158"; exon_number "4" gene_name "ZMYM4"; gene_biotype "protein_coding"; oId "lv:circZMYM4-844-001"; tissue "lv";
1	ncSplice	gene	35381259	35390098	.	+	.	gene_id "ENSG00000146463"; gene_name "ZMYM4"; gene_source "ncSplice"; gene_biotype "protein_coding";
1	ncSplice	transcript	35381259	35390098	.	+	.	gene_id "ENSG00000146463"; transcript_id "hsCircRNA-159"; gene_name "ZMYM4"; gene_biotype "protein_coding"; transcript_biotype "circRNA"; oId "lv:circZMYM4-845-001"; tissue "lv";
1	ncSplice	exon	35381259	35381433	.	+	.	gene_id "ENSG00000146463"; transcript_id "hsCircRNA-159"; exon_number "1" gene_name "ZMYM4"; gene_biotype "protein_coding"; oId "lv:circZMYM4-845-001"; tissue "lv";
1	ncSplice	exon	35381546	35386189	.	+	.	gene_id "ENSG00000146463"; transcript_id "hsCircRNA-159"; exon_number "2" gene_name "ZMYM4"; gene_biotype "protein_coding"; oId "lv:circZMYM4-845-001"; tissue "lv";
1	ncSplice	exon	35387003	35387604	.	+	.	gene_id "ENSG00000146463"; transcript_id "hsCircRNA-159"; exon_number "3" gene_name "ZMYM4"; gene_biotype "protein_coding"; oId "lv:circZMYM4-845-001"; tissue "lv";
1	ncSplice	exon	35388910	35389082	.	+	.	gene_id "ENSG00000146463"; transcript_id "hsCircRNA-159"; exon_number "4" gene_name "ZMYM4"; gene_biotype "protein_coding"; oId "lv:circZMYM4-845-001"; tissue "lv";
1	ncSplice	exon	35389948	35390098	.	+	.	gene_id "ENSG00000146463"; transcript_id "hsCircRNA-159"; exon_number "5" gene_name "ZMYM4"; gene_biotype "protein_coding"; oId "lv:circZMYM4-845-001"; tissue "lv";
13	ncSplice	gene	60439688	60467379	.	+	.	gene_id "ENSG00000083544"; gene_name "TDRD3"; gene_source "ncSplice"; gene_biotype "protein_coding";
13	ncSplice	transcript	60439688	60467379	.	+	.	gene_id "ENSG00000083544"; transcript_id "hsCircRNA-160"; gene_name "TDRD3"; gene_biotype "protein_coding"; transcript_biotype "circRNA"; oId "lv:circTDRD3-851-001|ce:circTDRD3-3721-001|ts:circTDRD3-3494-001"; tissue "lv|ce|ts";
13	ncSplice	exon	60439688	60439772	.	+	.	gene_id "ENSG00000083544"; transcript_id "hsCircRNA-160"; exon_number "1" gene_name "TDRD3"; gene_biotype "protein_coding"; oId "lv:circTDRD3-851-001|ce:circTDRD3-3721-001|ts:circTDRD3-3494-001"; tissue "lv|ce|ts";
13	ncSplice	exon	60444683	60444748	.	+	.	gene_id "ENSG00000083544"; transcript_id "hsCircRNA-160"; exon_number "2" gene_name "TDRD3"; gene_biotype "protein_coding"; oId "lv:circTDRD3-851-001|ce:circTDRD3-3721-001|ts:circTDRD3-3494-001"; tissue "lv|ce|ts";
13	ncSplice	exon	60460380	60460540	.	+	.	gene_id "ENSG00000083544"; transcript_id "hsCircRNA-160"; exon_number "3" gene_name "TDRD3"; gene_biotype "protein_coding"; oId "lv:circTDRD3-851-001|ce:circTDRD3-3721-001|ts:circTDRD3-3494-001"; tissue "lv|ce|ts";
13	ncSplice	exon	60467238	60467379	.	+	.	gene_id "ENSG00000083544"; transcript_id "hsCircRNA-160"; exon_number "4" gene_name "TDRD3"; gene_biotype "protein_coding"; oId "lv:circTDRD3-851-001|ce:circTDRD3-3721-001|ts:circTDRD3-3494-001"; tissue "lv|ce|ts";
13	ncSplice	gene	95723242	95725252	.	+	.	gene_id "ENSG00000102580"; gene_name "DNAJC3"; gene_source "ncSplice"; gene_biotype "protein_coding";
13	ncSplice	transcript	95723242	95725252	.	+	.	gene_id "ENSG00000102580"; transcript_id "hsCircRNA-161"; gene_name "DNAJC3"; gene_biotype "protein_coding"; transcript_biotype "circRNA"; oId "lv:circDNAJC3-860-001"; tissue "lv";
13	ncSplice	exon	95723242	95723366	.	+	.	gene_id "ENSG00000102580"; transcript_id "hsCircRNA-161"; exon_number "1" gene_name "DNAJC3"; gene_biotype "protein_coding"; oId "lv:circDNAJC3-860-001"; tissue "lv";
13	ncSplice	exon	95725178	95725252	.	+	.	gene_id "ENSG00000102580"; transcript_id "hsCircRNA-161"; exon_number "2" gene_name "DNAJC3"; gene_biotype "protein_coding"; oId "lv:circDNAJC3-860-001"; tissue "lv";
13	ncSplice	gene	95832927	95837202	.	-	.	gene_id "ENSG00000102595"; gene_name "UGGT2"; gene_source "ncSplice"; gene_biotype "protein_coding";
13	ncSplice	transcript	95832927	95837202	.	-	.	gene_id "ENSG00000102595"; transcript_id "hsCircRNA-162"; gene_name "UGGT2"; gene_biotype "protein_coding"; transcript_biotype "circRNA"; oId "lv:circUGGT2-861-001"; tissue "lv";
13	ncSplice	exon	95832927	95833053	.	-	.	gene_id "ENSG00000102595"; transcript_id "hsCircRNA-162"; exon_number "1" gene_name "UGGT2"; gene_biotype "protein_coding"; oId "lv:circUGGT2-861-001"; tissue "lv";
13	ncSplice	exon	95837086	95837202	.	-	.	gene_id "ENSG00000102595"; transcript_id "hsCircRNA-162"; exon_number "2" gene_name "UGGT2"; gene_biotype "protein_coding"; oId "lv:circUGGT2-861-001"; tissue "lv";
13	ncSplice	gene	99238427	99244624	.	+	.	gene_id "ENSG00000134882"; gene_name "UBAC2"; gene_source "ncSplice"; gene_biotype "protein_coding";
13	ncSplice	transcript	99238427	99244624	.	+	.	gene_id "ENSG00000134882"; transcript_id "hsCircRNA-163"; gene_name "UBAC2"; gene_biotype "protein_coding"; transcript_biotype "circRNA"; oId "lv:circUBAC2-864-001|ce:circUBAC2-3825-001|ts:circUBAC2-3593-001"; tissue "lv|ce|ts";
13	ncSplice	exon	99238427	99238554	.	+	.	gene_id "ENSG00000134882"; transcript_id "hsCircRNA-163"; exon_number "1" gene_name "UBAC2"; gene_biotype "protein_coding"; oId "lv:circUBAC2-864-001|ce:circUBAC2-3825-001|ts:circUBAC2-3593-001"; tissue "lv|ce|ts";
13	ncSplice	exon	99243832	99243951	.	+	.	gene_id "ENSG00000134882"; transcript_id "hsCircRNA-163"; exon_number "2" gene_name "UBAC2"; gene_biotype "protein_coding"; oId "lv:circUBAC2-864-001|ce:circUBAC2-3825-001|ts:circUBAC2-3593-001"; tissue "lv|ce|ts";
13	ncSplice	exon	99244515	99244624	.	+	.	gene_id "ENSG00000134882"; transcript_id "hsCircRNA-163"; exon_number "3" gene_name "UBAC2"; gene_biotype "protein_coding"; oId "lv:circUBAC2-864-001|ce:circUBAC2-3825-001|ts:circUBAC2-3593-001"; tissue "lv|ce|ts";
1	ncSplice	gene	41070595	41075451	.	-	.	gene_id "ENSG00000010803"; gene_name "SCMH1"; gene_source "ncSplice"; gene_biotype "protein_coding";
1	ncSplice	transcript	41070595	41075451	.	-	.	gene_id "ENSG00000010803"; transcript_id "hsCircRNA-164"; gene_name "SCMH1"; gene_biotype "protein_coding"; transcript_biotype "circRNA"; oId "lv:circSCMH1-879-001|ts:circSCMH1-3653-002"; tissue "lv|ts";
1	ncSplice	exon	41070595	41070721	.	-	.	gene_id "ENSG00000010803"; transcript_id "hsCircRNA-164"; exon_number "1" gene_name "SCMH1"; gene_biotype "protein_coding"; oId "lv:circSCMH1-879-001|ts:circSCMH1-3653-002"; tissue "lv|ts";
1	ncSplice	exon	41075219	41075451	.	-	.	gene_id "ENSG00000010803"; transcript_id "hsCircRNA-164"; exon_number "2" gene_name "SCMH1"; gene_biotype "protein_coding"; oId "lv:circSCMH1-879-001|ts:circSCMH1-3653-002"; tissue "lv|ts";
14	ncSplice	gene	21503173	21503881	.	-	.	gene_id "ENSG00000165819"; gene_name "METTL3"; gene_source "ncSplice"; gene_biotype "protein_coding";
14	ncSplice	transcript	21503173	21503881	.	-	.	gene_id "ENSG00000165819"; transcript_id "hsCircRNA-165"; gene_name "METTL3"; gene_biotype "protein_coding"; transcript_biotype "circRNA"; oId "lv:circMETTL3-887-001|ts:circMETTL3-3674-002"; tissue "lv|ts";
14	ncSplice	exon	21503173	21503291	.	-	.	gene_id "ENSG00000165819"; transcript_id "hsCircRNA-165"; exon_number "1" gene_name "METTL3"; gene_biotype "protein_coding"; oId "lv:circMETTL3-887-001|ts:circMETTL3-3674-002"; tissue "lv|ts";
14	ncSplice	exon	21503506	21503577	.	-	.	gene_id "ENSG00000165819"; transcript_id "hsCircRNA-165"; exon_number "2" gene_name "METTL3"; gene_biotype "protein_coding"; oId "lv:circMETTL3-887-001|ts:circMETTL3-3674-002"; tissue "lv|ts";
14	ncSplice	exon	21503664	21503881	.	-	.	gene_id "ENSG00000165819"; transcript_id "hsCircRNA-165"; exon_number "3" gene_name "METTL3"; gene_biotype "protein_coding"; oId "lv:circMETTL3-887-001|ts:circMETTL3-3674-002"; tissue "lv|ts";
1	ncSplice	gene	42265115	42278784	.	-	.	gene_id "ENSG00000198815"; gene_name "FOXJ3"; gene_source "ncSplice"; gene_biotype "protein_coding";
1	ncSplice	transcript	42265115	42278784	.	-	.	gene_id "ENSG00000198815"; transcript_id "hsCircRNA-166"; gene_name "FOXJ3"; gene_biotype "protein_coding"; transcript_biotype "circRNA"; oId "lv:circFOXJ3-888-001|ce:circFOXJ3-3928-001|ts:circFOXJ3-3680-003"; tissue "lv|ce|ts";
1	ncSplice	exon	42265115	42265189	.	-	.	gene_id "ENSG00000198815"; transcript_id "hsCircRNA-166"; exon_number "1" gene_name "FOXJ3"; gene_biotype "protein_coding"; oId "lv:circFOXJ3-888-001|ce:circFOXJ3-3928-001|ts:circFOXJ3-3680-003"; tissue "lv|ce|ts";
1	ncSplice	exon	42278348	42278784	.	-	.	gene_id "ENSG00000198815"; transcript_id "hsCircRNA-166"; exon_number "2" gene_name "FOXJ3"; gene_biotype "protein_coding"; oId "lv:circFOXJ3-888-001|ce:circFOXJ3-3928-001|ts:circFOXJ3-3680-003"; tissue "lv|ce|ts";
14	ncSplice	gene	22906195	22911403	.	-	.	gene_id "ENSG00000100461"; gene_name "RBM23"; gene_source "ncSplice"; gene_biotype "protein_coding";
14	ncSplice	transcript	22906195	22911403	.	-	.	gene_id "ENSG00000100461"; transcript_id "hsCircRNA-167"; gene_name "RBM23"; gene_biotype "protein_coding"; transcript_biotype "circRNA"; oId "lv:circRBM23-893-003|ce:circRBM23-3932-004|ts:circRBM23-3682-004"; tissue "lv|ce|ts";
14	ncSplice	exon	22906195	22906368	.	-	.	gene_id "ENSG00000100461"; transcript_id "hsCircRNA-167"; exon_number "1" gene_name "RBM23"; gene_biotype "protein_coding"; oId "lv:circRBM23-893-003|ce:circRBM23-3932-004|ts:circRBM23-3682-004"; tissue "lv|ce|ts";
14	ncSplice	exon	22909483	22909595	.	-	.	gene_id "ENSG00000100461"; transcript_id "hsCircRNA-167"; exon_number "2" gene_name "RBM23"; gene_biotype "protein_coding"; oId "lv:circRBM23-893-003|ce:circRBM23-3932-004|ts:circRBM23-3682-004"; tissue "lv|ce|ts";
14	ncSplice	exon	22911328	22911403	.	-	.	gene_id "ENSG00000100461"; transcript_id "hsCircRNA-167"; exon_number "3" gene_name "RBM23"; gene_biotype "protein_coding"; oId "lv:circRBM23-893-003|ce:circRBM23-3932-004|ts:circRBM23-3682-004"; tissue "lv|ce|ts";
14	ncSplice	gene	30935163	30956242	.	-	.	gene_id "ENSG00000196792"; gene_name "STRN3"; gene_source "ncSplice"; gene_biotype "protein_coding";
14	ncSplice	transcript	30935163	30956242	.	-	.	gene_id "ENSG00000196792"; transcript_id "hsCircRNA-168"; gene_name "STRN3"; gene_biotype "protein_coding"; transcript_biotype "circRNA"; oId "lv:circSTRN3-902-001|ce:circSTRN3-3962-005|ts:circSTRN3-3724-006"; tissue "lv|ce|ts";
14	ncSplice	exon	30935163	30935304	.	-	.	gene_id "ENSG00000196792"; transcript_id "hsCircRNA-168"; exon_number "1" gene_name "STRN3"; gene_biotype "protein_coding"; oId "lv:circSTRN3-902-001|ce:circSTRN3-3962-005|ts:circSTRN3-3724-006"; tissue "lv|ce|ts";
14	ncSplice	exon	30936495	30936624	.	-	.	gene_id "ENSG00000196792"; transcript_id "hsCircRNA-168"; exon_number "2" gene_name "STRN3"; gene_biotype "protein_coding"; oId "lv:circSTRN3-902-001|ce:circSTRN3-3962-005|ts:circSTRN3-3724-006"; tissue "lv|ce|ts";
14	ncSplice	exon	30947090	30947263	.	-	.	gene_id "ENSG00000196792"; transcript_id "hsCircRNA-168"; exon_number "3" gene_name "STRN3"; gene_biotype "protein_coding"; oId "lv:circSTRN3-902-001|ce:circSTRN3-3962-005|ts:circSTRN3-3724-006"; tissue "lv|ce|ts";
14	ncSplice	exon	30950863	30950944	.	-	.	gene_id "ENSG00000196792"; transcript_id "hsCircRNA-168"; exon_number "4" gene_name "STRN3"; gene_biotype "protein_coding"; oId "lv:circSTRN3-902-001|ce:circSTRN3-3962-005|ts:circSTRN3-3724-006"; tissue "lv|ce|ts";
14	ncSplice	exon	30955620	30955693	.	-	.	gene_id "ENSG00000196792"; transcript_id "hsCircRNA-168"; exon_number "5" gene_name "STRN3"; gene_biotype "protein_coding"; oId "lv:circSTRN3-902-001|ce:circSTRN3-3962-005|ts:circSTRN3-3724-006"; tissue "lv|ce|ts";
14	ncSplice	exon	30956139	30956242	.	-	.	gene_id "ENSG00000196792"; transcript_id "hsCircRNA-168"; exon_number "6" gene_name "STRN3"; gene_biotype "protein_coding"; oId "lv:circSTRN3-902-001|ce:circSTRN3-3962-005|ts:circSTRN3-3724-006"; tissue "lv|ce|ts";
14	ncSplice	gene	31127785	31133675	.	-	.	gene_id "ENSG00000092148"; gene_name "HECTD1"; gene_source "ncSplice"; gene_biotype "protein_coding";
14	ncSplice	transcript	31127785	31133675	.	-	.	gene_id "ENSG00000092148"; transcript_id "hsCircRNA-169"; gene_name "HECTD1"; gene_biotype "protein_coding"; transcript_biotype "circRNA"; oId "lv:circHECTD1-906-001|ts:circHECTD1-3730-003"; tissue "lv|ts";
14	ncSplice	exon	31127785	31128006	.	-	.	gene_id "ENSG00000092148"; transcript_id "hsCircRNA-169"; exon_number "1" gene_name "HECTD1"; gene_biotype "protein_coding"; oId "lv:circHECTD1-906-001|ts:circHECTD1-3730-003"; tissue "lv|ts";
14	ncSplice	exon	31128612	31129307	.	-	.	gene_id "ENSG00000092148"; transcript_id "hsCircRNA-169"; exon_number "2" gene_name "HECTD1"; gene_biotype "protein_coding"; oId "lv:circHECTD1-906-001|ts:circHECTD1-3730-003"; tissue "lv|ts";
14	ncSplice	exon	31133238	31133414	.	-	.	gene_id "ENSG00000092148"; transcript_id "hsCircRNA-169"; exon_number "3" gene_name "HECTD1"; gene_biotype "protein_coding"; oId "lv:circHECTD1-906-001|ts:circHECTD1-3730-003"; tissue "lv|ts";
14	ncSplice	exon	31133509	31133675	.	-	.	gene_id "ENSG00000092148"; transcript_id "hsCircRNA-169"; exon_number "4" gene_name "HECTD1"; gene_biotype "protein_coding"; oId "lv:circHECTD1-906-001|ts:circHECTD1-3730-003"; tissue "lv|ts";
14	ncSplice	gene	34969170	34972064	.	-	.	gene_id "ENSG00000258704"; gene_name "SRP54-AS1"; gene_source "ncSplice"; gene_biotype "processed_transcript";
14	ncSplice	transcript	34969170	34972064	.	-	.	gene_id "ENSG00000258704"; transcript_id "hsCircRNA-170"; gene_name "SRP54-AS1"; gene_biotype "processed_transcript"; transcript_biotype "circRNA"; oId "lv:circSRP54-AS1-912-001|ce:circSRP54-AS1-4001-001"; tissue "lv|ce";
14	ncSplice	exon	34969170	34969307	.	-	.	gene_id "ENSG00000258704"; transcript_id "hsCircRNA-170"; exon_number "1" gene_name "SRP54-AS1"; gene_biotype "processed_transcript"; oId "lv:circSRP54-AS1-912-001|ce:circSRP54-AS1-4001-001"; tissue "lv|ce";
14	ncSplice	exon	34971942	34972064	.	-	.	gene_id "ENSG00000258704"; transcript_id "hsCircRNA-170"; exon_number "2" gene_name "SRP54-AS1"; gene_biotype "processed_transcript"; oId "lv:circSRP54-AS1-912-001|ce:circSRP54-AS1-4001-001"; tissue "lv|ce";
14	ncSplice	gene	39179091	39179462	.	+	.	gene_id "ENSG00000100941"; gene_name "PNN"; gene_source "ncSplice"; gene_biotype "protein_coding";
14	ncSplice	transcript	39179091	39179462	.	+	.	gene_id "ENSG00000100941"; transcript_id "hsCircRNA-171"; gene_name "PNN"; gene_biotype "protein_coding"; transcript_biotype "circRNA"; oId "lv:circPNN-918-001"; tissue "lv";
14	ncSplice	exon	39179091	39179246	.	+	.	gene_id "ENSG00000100941"; transcript_id "hsCircRNA-171"; exon_number "1" gene_name "PNN"; gene_biotype "protein_coding"; oId "lv:circPNN-918-001"; tissue "lv";
14	ncSplice	exon	39179324	39179462	.	+	.	gene_id "ENSG00000100941"; transcript_id "hsCircRNA-171"; exon_number "2" gene_name "PNN"; gene_biotype "protein_coding"; oId "lv:circPNN-918-001"; tissue "lv";
14	ncSplice	gene	39276934	39279537	.	+	.	gene_id "ENSG00000150527"; gene_name "CTAGE5"; gene_source "ncSplice"; gene_biotype "protein_coding";
14	ncSplice	transcript	39276934	39279537	.	+	.	gene_id "ENSG00000150527"; transcript_id "hsCircRNA-172"; gene_name "CTAGE5"; gene_biotype "protein_coding"; transcript_biotype "circRNA"; oId "lv:circCTAGE5-920-001|ce:circCTAGE5-4032-001|ts:circCTAGE5-3816-001"; tissue "lv|ce|ts";
14	ncSplice	exon	39276934	39277065	.	+	.	gene_id "ENSG00000150527"; transcript_id "hsCircRNA-172"; exon_number "1" gene_name "CTAGE5"; gene_biotype "protein_coding"; oId "lv:circCTAGE5-920-001|ce:circCTAGE5-4032-001|ts:circCTAGE5-3816-001"; tissue "lv|ce|ts";
14	ncSplice	exon	39279337	39279358	.	+	.	gene_id "ENSG00000150527"; transcript_id "hsCircRNA-172"; exon_number "2" gene_name "CTAGE5"; gene_biotype "protein_coding"; oId "lv:circCTAGE5-920-001|ce:circCTAGE5-4032-001|ts:circCTAGE5-3816-001"; tissue "lv|ce|ts";
14	ncSplice	exon	39279449	39279537	.	+	.	gene_id "ENSG00000150527"; transcript_id "hsCircRNA-172"; exon_number "3" gene_name "CTAGE5"; gene_biotype "protein_coding"; oId "lv:circCTAGE5-920-001|ce:circCTAGE5-4032-001|ts:circCTAGE5-3816-001"; tissue "lv|ce|ts";
1	ncSplice	gene	45566569	45567020	.	+	.	gene_id "ENSG00000117448"; gene_name "AKR1A1"; gene_source "ncSplice"; gene_biotype "protein_coding";
1	ncSplice	transcript	45566569	45567020	.	+	.	gene_id "ENSG00000117448"; transcript_id "hsCircRNA-173"; gene_name "AKR1A1"; gene_biotype "protein_coding"; transcript_biotype "circRNA"; oId "lv:circAKR1A1-932-001"; tissue "lv";
1	ncSplice	exon	45566569	45566688	.	+	.	gene_id "ENSG00000117448"; transcript_id "hsCircRNA-173"; exon_number "1" gene_name "AKR1A1"; gene_biotype "protein_coding"; oId "lv:circAKR1A1-932-001"; tissue "lv";
1	ncSplice	exon	45566869	45567020	.	+	.	gene_id "ENSG00000117448"; transcript_id "hsCircRNA-173"; exon_number "2" gene_name "AKR1A1"; gene_biotype "protein_coding"; oId "lv:circAKR1A1-932-001"; tissue "lv";
14	ncSplice	gene	58318542	58330169	.	+	.	gene_id "ENSG00000032219"; gene_name "ARID4A"; gene_source "ncSplice"; gene_biotype "protein_coding";
14	ncSplice	transcript	58318542	58330169	.	+	.	gene_id "ENSG00000032219"; transcript_id "hsCircRNA-174"; gene_name "ARID4A"; gene_biotype "protein_coding"; transcript_biotype "circRNA"; oId "lv:circARID4A-938-001|ce:circARID4A-4148-003|ts:circARID4A-3913-004"; tissue "lv|ce|ts";
14	ncSplice	exon	58318542	58318621	.	+	.	gene_id "ENSG00000032219"; transcript_id "hsCircRNA-174"; exon_number "1" gene_name "ARID4A"; gene_biotype "protein_coding"; oId "lv:circARID4A-938-001|ce:circARID4A-4148-003|ts:circARID4A-3913-004"; tissue "lv|ce|ts";
14	ncSplice	exon	58318711	58318805	.	+	.	gene_id "ENSG00000032219"; transcript_id "hsCircRNA-174"; exon_number "2" gene_name "ARID4A"; gene_biotype "protein_coding"; oId "lv:circARID4A-938-001|ce:circARID4A-4148-003|ts:circARID4A-3913-004"; tissue "lv|ce|ts";
14	ncSplice	exon	58323485	58323617	.	+	.	gene_id "ENSG00000032219"; transcript_id "hsCircRNA-174"; exon_number "3" gene_name "ARID4A"; gene_biotype "protein_coding"; oId "lv:circARID4A-938-001|ce:circARID4A-4148-003|ts:circARID4A-3913-004"; tissue "lv|ce|ts";
14	ncSplice	exon	58328237	58328316	.	+	.	gene_id "ENSG00000032219"; transcript_id "hsCircRNA-174"; exon_number "4" gene_name "ARID4A"; gene_biotype "protein_coding"; oId "lv:circARID4A-938-001|ce:circARID4A-4148-003|ts:circARID4A-3913-004"; tissue "lv|ce|ts";
14	ncSplice	exon	58329528	58329604	.	+	.	gene_id "ENSG00000032219"; transcript_id "hsCircRNA-174"; exon_number "5" gene_name "ARID4A"; gene_biotype "protein_coding"; oId "lv:circARID4A-938-001|ce:circARID4A-4148-003|ts:circARID4A-3913-004"; tissue "lv|ce|ts";
14	ncSplice	exon	58330003	58330169	.	+	.	gene_id "ENSG00000032219"; transcript_id "hsCircRNA-174"; exon_number "6" gene_name "ARID4A"; gene_biotype "protein_coding"; oId "lv:circARID4A-938-001|ce:circARID4A-4148-003|ts:circARID4A-3913-004"; tissue "lv|ce|ts";
14	ncSplice	gene	66965191	67058786	.	+	.	gene_id "ENSG00000171723"; gene_name "GPHN"; gene_source "ncSplice"; gene_biotype "protein_coding";
14	ncSplice	transcript	66965191	67058786	.	+	.	gene_id "ENSG00000171723"; transcript_id "hsCircRNA-175"; gene_name "GPHN"; gene_biotype "protein_coding"; transcript_biotype "circRNA"; oId "lv:circGPHN-947-002"; tissue "lv";
14	ncSplice	exon	66965191	66965325	.	+	.	gene_id "ENSG00000171723"; transcript_id "hsCircRNA-175"; exon_number "1" gene_name "GPHN"; gene_biotype "protein_coding"; oId "lv:circGPHN-947-002"; tissue "lv";
14	ncSplice	exon	67023633	67023675	.	+	.	gene_id "ENSG00000171723"; transcript_id "hsCircRNA-175"; exon_number "2" gene_name "GPHN"; gene_biotype "protein_coding"; oId "lv:circGPHN-947-002"; tissue "lv";
14	ncSplice	exon	67058649	67058786	.	+	.	gene_id "ENSG00000171723"; transcript_id "hsCircRNA-175"; exon_number "3" gene_name "GPHN"; gene_biotype "protein_coding"; oId "lv:circGPHN-947-002"; tissue "lv";
14	ncSplice	gene	71413948	71418196	.	+	.	gene_id "ENSG00000197555"; gene_name "SIPA1L1"; gene_source "ncSplice"; gene_biotype "protein_coding";
14	ncSplice	transcript	71413948	71418196	.	+	.	gene_id "ENSG00000197555"; transcript_id "hsCircRNA-176"; gene_name "SIPA1L1"; gene_biotype "protein_coding"; transcript_biotype "circRNA"; oId "lv:circSIPA1L1-956-001"; tissue "lv";
14	ncSplice	exon	71413948	71414014	.	+	.	gene_id "ENSG00000197555"; transcript_id "hsCircRNA-176"; exon_number "1" gene_name "SIPA1L1"; gene_biotype "protein_coding"; oId "lv:circSIPA1L1-956-001"; tissue "lv";
14	ncSplice	exon	71418130	71418196	.	+	.	gene_id "ENSG00000197555"; transcript_id "hsCircRNA-176"; exon_number "2" gene_name "SIPA1L1"; gene_biotype "protein_coding"; oId "lv:circSIPA1L1-956-001"; tissue "lv";
14	ncSplice	gene	88574693	88578140	.	+	.	gene_id "ENSG00000100722"; gene_name "ZC3H14"; gene_source "ncSplice"; gene_biotype "protein_coding";
14	ncSplice	transcript	88574693	88578140	.	+	.	gene_id "ENSG00000100722"; transcript_id "hsCircRNA-177"; gene_name "ZC3H14"; gene_biotype "protein_coding"; transcript_biotype "circRNA"; oId "lv:circZC3H14-973-001|ce:circZC3H14-4324-001"; tissue "lv|ce";
14	ncSplice	exon	88574693	88574853	.	+	.	gene_id "ENSG00000100722"; transcript_id "hsCircRNA-177"; exon_number "1" gene_name "ZC3H14"; gene_biotype "protein_coding"; oId "lv:circZC3H14-973-001|ce:circZC3H14-4324-001"; tissue "lv|ce";
14	ncSplice	exon	88575840	88575940	.	+	.	gene_id "ENSG00000100722"; transcript_id "hsCircRNA-177"; exon_number "2" gene_name "ZC3H14"; gene_biotype "protein_coding"; oId "lv:circZC3H14-973-001|ce:circZC3H14-4324-001"; tissue "lv|ce";
14	ncSplice	exon	88577993	88578140	.	+	.	gene_id "ENSG00000100722"; transcript_id "hsCircRNA-177"; exon_number "3" gene_name "ZC3H14"; gene_biotype "protein_coding"; oId "lv:circZC3H14-973-001|ce:circZC3H14-4324-001"; tissue "lv|ce";
14	ncSplice	gene	88575840	88578140	.	+	.	gene_id "ENSG00000100722"; gene_name "ZC3H14"; gene_source "ncSplice"; gene_biotype "protein_coding";
14	ncSplice	transcript	88575840	88578140	.	+	.	gene_id "ENSG00000100722"; transcript_id "hsCircRNA-178"; gene_name "ZC3H14"; gene_biotype "protein_coding"; transcript_biotype "circRNA"; oId "lv:circZC3H14-974-001"; tissue "lv";
14	ncSplice	exon	88575840	88575940	.	+	.	gene_id "ENSG00000100722"; transcript_id "hsCircRNA-178"; exon_number "1" gene_name "ZC3H14"; gene_biotype "protein_coding"; oId "lv:circZC3H14-974-001"; tissue "lv";
14	ncSplice	exon	88577993	88578140	.	+	.	gene_id "ENSG00000100722"; transcript_id "hsCircRNA-178"; exon_number "2" gene_name "ZC3H14"; gene_biotype "protein_coding"; oId "lv:circZC3H14-974-001"; tissue "lv";
14	ncSplice	gene	96555847	96556413	.	+	.	gene_id "ENSG00000090060"; gene_name "PAPOLA"; gene_source "ncSplice"; gene_biotype "protein_coding";
14	ncSplice	transcript	96555847	96556413	.	+	.	gene_id "ENSG00000090060"; transcript_id "hsCircRNA-179"; gene_name "PAPOLA"; gene_biotype "protein_coding"; transcript_biotype "circRNA"; oId "lv:circPAPOLA-983-001|ce:circPAPOLA-4417-001"; tissue "lv|ce";
14	ncSplice	exon	96555847	96555947	.	+	.	gene_id "ENSG00000090060"; transcript_id "hsCircRNA-179"; exon_number "1" gene_name "PAPOLA"; gene_biotype "protein_coding"; oId "lv:circPAPOLA-983-001|ce:circPAPOLA-4417-001"; tissue "lv|ce";
14	ncSplice	exon	96556175	96556413	.	+	.	gene_id "ENSG00000090060"; transcript_id "hsCircRNA-179"; exon_number "2" gene_name "PAPOLA"; gene_biotype "protein_coding"; oId "lv:circPAPOLA-983-001|ce:circPAPOLA-4417-001"; tissue "lv|ce";
14	ncSplice	gene	99458279	99465813	.	-	.	gene_id "ENSG00000183576"; gene_name "SETD3"; gene_source "ncSplice"; gene_biotype "protein_coding";
14	ncSplice	transcript	99458279	99465813	.	-	.	gene_id "ENSG00000183576"; transcript_id "hsCircRNA-180"; gene_name "SETD3"; gene_biotype "protein_coding"; transcript_biotype "circRNA"; oId "lv:circSETD3-985-001|ce:circSETD3-4425-003|ts:circSETD3-4234-009"; tissue "lv|ce|ts";
14	ncSplice	exon	99458279	99458535	.	-	.	gene_id "ENSG00000183576"; transcript_id "hsCircRNA-180"; exon_number "1" gene_name "SETD3"; gene_biotype "protein_coding"; oId "lv:circSETD3-985-001|ce:circSETD3-4425-003|ts:circSETD3-4234-009"; tissue "lv|ce|ts";
14	ncSplice	exon	99459113	99459185	.	-	.	gene_id "ENSG00000183576"; transcript_id "hsCircRNA-180"; exon_number "2" gene_name "SETD3"; gene_biotype "protein_coding"; oId "lv:circSETD3-985-001|ce:circSETD3-4425-003|ts:circSETD3-4234-009"; tissue "lv|ce|ts";
14	ncSplice	exon	99461192	99461340	.	-	.	gene_id "ENSG00000183576"; transcript_id "hsCircRNA-180"; exon_number "3" gene_name "SETD3"; gene_biotype "protein_coding"; oId "lv:circSETD3-985-001|ce:circSETD3-4425-003|ts:circSETD3-4234-009"; tissue "lv|ce|ts";
14	ncSplice	exon	99463486	99463578	.	-	.	gene_id "ENSG00000183576"; transcript_id "hsCircRNA-180"; exon_number "4" gene_name "SETD3"; gene_biotype "protein_coding"; oId "lv:circSETD3-985-001|ce:circSETD3-4425-003|ts:circSETD3-4234-009"; tissue "lv|ce|ts";
14	ncSplice	exon	99465703	99465813	.	-	.	gene_id "ENSG00000183576"; transcript_id "hsCircRNA-180"; exon_number "5" gene_name "SETD3"; gene_biotype "protein_coding"; oId "lv:circSETD3-985-001|ce:circSETD3-4425-003|ts:circSETD3-4234-009"; tissue "lv|ce|ts";
1	ncSplice	gene	50490588	50535457	.	-	.	gene_id "ENSG00000185104"; gene_name "FAF1"; gene_source "ncSplice"; gene_biotype "protein_coding";
1	ncSplice	transcript	50490588	50535457	.	-	.	gene_id "ENSG00000185104"; transcript_id "hsCircRNA-181"; gene_name "FAF1"; gene_biotype "protein_coding"; transcript_biotype "circRNA"; oId "lv:circFAF1-986-001|ce:circFAF1-4427-001"; tissue "lv|ce";
1	ncSplice	exon	50490588	50490665	.	-	.	gene_id "ENSG00000185104"; transcript_id "hsCircRNA-181"; exon_number "1" gene_name "FAF1"; gene_biotype "protein_coding"; oId "lv:circFAF1-986-001|ce:circFAF1-4427-001"; tissue "lv|ce";
1	ncSplice	exon	50491721	50491801	.	-	.	gene_id "ENSG00000185104"; transcript_id "hsCircRNA-181"; exon_number "2" gene_name "FAF1"; gene_biotype "protein_coding"; oId "lv:circFAF1-986-001|ce:circFAF1-4427-001"; tissue "lv|ce";
1	ncSplice	exon	50535369	50535457	.	-	.	gene_id "ENSG00000185104"; transcript_id "hsCircRNA-181"; exon_number "3" gene_name "FAF1"; gene_biotype "protein_coding"; oId "lv:circFAF1-986-001|ce:circFAF1-4427-001"; tissue "lv|ce";
15	ncSplice	gene	100564692	100565265	.	-	.	gene_id "ENSG00000140471"; gene_name "LINS"; gene_source "ncSplice"; gene_biotype "protein_coding";
15	ncSplice	transcript	100564692	100565265	.	-	.	gene_id "ENSG00000140471"; transcript_id "hsCircRNA-182"; gene_name "LINS"; gene_biotype "protein_coding"; transcript_biotype "circRNA"; oId "lv:circLINS-991-001|ce:circLINS-4437-001"; tissue "lv|ce";
15	ncSplice	exon	100564692	100564785	.	-	.	gene_id "ENSG00000140471"; transcript_id "hsCircRNA-182"; exon_number "1" gene_name "LINS"; gene_biotype "protein_coding"; oId "lv:circLINS-991-001|ce:circLINS-4437-001"; tissue "lv|ce";
15	ncSplice	exon	100565195	100565265	.	-	.	gene_id "ENSG00000140471"; transcript_id "hsCircRNA-182"; exon_number "2" gene_name "LINS"; gene_biotype "protein_coding"; oId "lv:circLINS-991-001|ce:circLINS-4437-001"; tissue "lv|ce";
15	ncSplice	gene	101366196	101370523	.	-	.	gene_id "ENSG00000140479"; gene_name "PCSK6"; gene_source "ncSplice"; gene_biotype "protein_coding";
15	ncSplice	transcript	101366196	101370523	.	-	.	gene_id "ENSG00000140479"; transcript_id "hsCircRNA-183"; gene_name "PCSK6"; gene_biotype "protein_coding"; transcript_biotype "circRNA"; oId "lv:circPCSK6-992-001"; tissue "lv";
15	ncSplice	exon	101366196	101366332	.	-	.	gene_id "ENSG00000140479"; transcript_id "hsCircRNA-183"; exon_number "1" gene_name "PCSK6"; gene_biotype "protein_coding"; oId "lv:circPCSK6-992-001"; tissue "lv";
15	ncSplice	exon	101370335	101370523	.	-	.	gene_id "ENSG00000140479"; transcript_id "hsCircRNA-183"; exon_number "2" gene_name "PCSK6"; gene_biotype "protein_coding"; oId "lv:circPCSK6-992-001"; tissue "lv";
1	ncSplice	gene	51402435	51408332	.	-	.	gene_id "ENSG00000085832"; gene_name "EPS15"; gene_source "ncSplice"; gene_biotype "protein_coding";
1	ncSplice	transcript	51402435	51408332	.	-	.	gene_id "ENSG00000085832"; transcript_id "hsCircRNA-184"; gene_name "EPS15"; gene_biotype "protein_coding"; transcript_biotype "circRNA"; oId "lv:circEPS15-999-001|ce:circEPS15-4452-001"; tissue "lv|ce";
1	ncSplice	exon	51402435	51402525	.	-	.	gene_id "ENSG00000085832"; transcript_id "hsCircRNA-184"; exon_number "1" gene_name "EPS15"; gene_biotype "protein_coding"; oId "lv:circEPS15-999-001|ce:circEPS15-4452-001"; tissue "lv|ce";
1	ncSplice	exon	51403419	51403532	.	-	.	gene_id "ENSG00000085832"; transcript_id "hsCircRNA-184"; exon_number "2" gene_name "EPS15"; gene_biotype "protein_coding"; oId "lv:circEPS15-999-001|ce:circEPS15-4452-001"; tissue "lv|ce";
1	ncSplice	exon	51405905	51406108	.	-	.	gene_id "ENSG00000085832"; transcript_id "hsCircRNA-184"; exon_number "3" gene_name "EPS15"; gene_biotype "protein_coding"; oId "lv:circEPS15-999-001|ce:circEPS15-4452-001"; tissue "lv|ce";
1	ncSplice	exon	51408135	51408332	.	-	.	gene_id "ENSG00000085832"; transcript_id "hsCircRNA-184"; exon_number "4" gene_name "EPS15"; gene_biotype "protein_coding"; oId "lv:circEPS15-999-001|ce:circEPS15-4452-001"; tissue "lv|ce";
1	ncSplice	gene	51827796	51834170	.	-	.	gene_id "ENSG00000078618"; gene_name "NRD1"; gene_source "ncSplice"; gene_biotype "protein_coding";
1	ncSplice	transcript	51827796	51834170	.	-	.	gene_id "ENSG00000078618"; transcript_id "hsCircRNA-185"; gene_name "NRD1"; gene_biotype "protein_coding"; transcript_biotype "circRNA"; oId "lv:circNRD1-1005-001"; tissue "lv";
1	ncSplice	exon	51827796	51827869	.	-	.	gene_id "ENSG00000078618"; transcript_id "hsCircRNA-185"; exon_number "1" gene_name "NRD1"; gene_biotype "protein_coding"; oId "lv:circNRD1-1005-001"; tissue "lv";
1	ncSplice	exon	51834017	51834170	.	-	.	gene_id "ENSG00000078618"; transcript_id "hsCircRNA-185"; exon_number "2" gene_name "NRD1"; gene_biotype "protein_coding"; oId "lv:circNRD1-1005-001"; tissue "lv";
15	ncSplice	gene	22278818	22282869	.	+	.	gene_id "ENSG00000258732"; gene_name "RP11-603B24.1"; gene_source "ncSplice"; gene_biotype "unprocessed_pseudogene";
15	ncSplice	transcript	22278818	22282869	.	+	.	gene_id "ENSG00000258732"; transcript_id "hsCircRNA-186"; gene_name "RP11-603B24.1"; gene_biotype "unprocessed_pseudogene"; transcript_biotype "circRNA"; oId "lv:circRP11-603B24.1-1006-001"; tissue "lv";
15	ncSplice	exon	22278818	22279274	.	+	.	gene_id "ENSG00000258732"; transcript_id "hsCircRNA-186"; exon_number "1" gene_name "RP11-603B24.1"; gene_biotype "unprocessed_pseudogene"; oId "lv:circRP11-603B24.1-1006-001"; tissue "lv";
15	ncSplice	exon	22282799	22282869	.	+	.	gene_id "ENSG00000258732"; transcript_id "hsCircRNA-186"; exon_number "2" gene_name "RP11-603B24.1"; gene_biotype "unprocessed_pseudogene"; oId "lv:circRP11-603B24.1-1006-001"; tissue "lv";
1	ncSplice	gene	52493611	52509712	.	-	.	gene_id "ENSG00000134744"; gene_name "ZCCHC11"; gene_source "ncSplice"; gene_biotype "protein_coding";
1	ncSplice	transcript	52493611	52509712	.	-	.	gene_id "ENSG00000134744"; transcript_id "hsCircRNA-187"; gene_name "ZCCHC11"; gene_biotype "protein_coding"; transcript_biotype "circRNA"; oId "lv:circZCCHC11-1010-001|ce:circZCCHC11-4494-001|ts:circZCCHC11-4355-001"; tissue "lv|ce|ts";
1	ncSplice	exon	52493611	52493662	.	-	.	gene_id "ENSG00000134744"; transcript_id "hsCircRNA-187"; exon_number "1" gene_name "ZCCHC11"; gene_biotype "protein_coding"; oId "lv:circZCCHC11-1010-001|ce:circZCCHC11-4494-001|ts:circZCCHC11-4355-001"; tissue "lv|ce|ts";
1	ncSplice	exon	52495427	52495515	.	-	.	gene_id "ENSG00000134744"; transcript_id "hsCircRNA-187"; exon_number "2" gene_name "ZCCHC11"; gene_biotype "protein_coding"; oId "lv:circZCCHC11-1010-001|ce:circZCCHC11-4494-001|ts:circZCCHC11-4355-001"; tissue "lv|ce|ts";
1	ncSplice	exon	52497006	52497183	.	-	.	gene_id "ENSG00000134744"; transcript_id "hsCircRNA-187"; exon_number "3" gene_name "ZCCHC11"; gene_biotype "protein_coding"; oId "lv:circZCCHC11-1010-001|ce:circZCCHC11-4494-001|ts:circZCCHC11-4355-001"; tissue "lv|ce|ts";
1	ncSplice	exon	52509596	52509712	.	-	.	gene_id "ENSG00000134744"; transcript_id "hsCircRNA-187"; exon_number "4" gene_name "ZCCHC11"; gene_biotype "protein_coding"; oId "lv:circZCCHC11-1010-001|ce:circZCCHC11-4494-001|ts:circZCCHC11-4355-001"; tissue "lv|ce|ts";
15	ncSplice	gene	25405461	25411971	.	-	.	gene_id "ENSG00000114062"; gene_name "UBE3A"; gene_source "ncSplice"; gene_biotype "protein_coding";
15	ncSplice	transcript	25405461	25411971	.	-	.	gene_id "ENSG00000114062"; transcript_id "hsCircRNA-188"; gene_name "UBE3A"; gene_biotype "protein_coding"; transcript_biotype "circRNA"; oId "lv:circUBE3A-1011-001|ce:circUBE3A-4510-001|ts:circUBE3A-4367-001"; tissue "lv|ce|ts";
15	ncSplice	exon	25405461	25405502	.	-	.	gene_id "ENSG00000114062"; transcript_id "hsCircRNA-188"; exon_number "1" gene_name "UBE3A"; gene_biotype "protein_coding"; oId "lv:circUBE3A-1011-001|ce:circUBE3A-4510-001|ts:circUBE3A-4367-001"; tissue "lv|ce|ts";
15	ncSplice	exon	25407067	25407137	.	-	.	gene_id "ENSG00000114062"; transcript_id "hsCircRNA-188"; exon_number "2" gene_name "UBE3A"; gene_biotype "protein_coding"; oId "lv:circUBE3A-1011-001|ce:circUBE3A-4510-001|ts:circUBE3A-4367-001"; tissue "lv|ce|ts";
15	ncSplice	exon	25408620	25408684	.	-	.	gene_id "ENSG00000114062"; transcript_id "hsCircRNA-188"; exon_number "3" gene_name "UBE3A"; gene_biotype "protein_coding"; oId "lv:circUBE3A-1011-001|ce:circUBE3A-4510-001|ts:circUBE3A-4367-001"; tissue "lv|ce|ts";
15	ncSplice	exon	25409088	25409207	.	-	.	gene_id "ENSG00000114062"; transcript_id "hsCircRNA-188"; exon_number "4" gene_name "UBE3A"; gene_biotype "protein_coding"; oId "lv:circUBE3A-1011-001|ce:circUBE3A-4510-001|ts:circUBE3A-4367-001"; tissue "lv|ce|ts";
15	ncSplice	exon	25411908	25411971	.	-	.	gene_id "ENSG00000114062"; transcript_id "hsCircRNA-188"; exon_number "5" gene_name "UBE3A"; gene_biotype "protein_coding"; oId "lv:circUBE3A-1011-001|ce:circUBE3A-4510-001|ts:circUBE3A-4367-001"; tissue "lv|ce|ts";
15	ncSplice	gene	30474356	30484686	.	+	.	gene_id "ENSG00000215302"; gene_name "CTD-3092A11.1"; gene_source "ncSplice"; gene_biotype "transcribed_unprocessed_pseudogene";
15	ncSplice	transcript	30474356	30484686	.	+	.	gene_id "ENSG00000215302"; transcript_id "hsCircRNA-189"; gene_name "CTD-3092A11.1"; gene_biotype "transcribed_unprocessed_pseudogene"; transcript_biotype "circRNA"; oId "lv:circCTD-3092A11.1-1020-001|ts:circCTD-3092A11.1-4393-001"; tissue "lv|ts";
15	ncSplice	exon	30474356	30477942	.	+	.	gene_id "ENSG00000215302"; transcript_id "hsCircRNA-189"; exon_number "1" gene_name "CTD-3092A11.1"; gene_biotype "transcribed_unprocessed_pseudogene"; oId "lv:circCTD-3092A11.1-1020-001|ts:circCTD-3092A11.1-4393-001"; tissue "lv|ts";
15	ncSplice	exon	30479024	30479193	.	+	.	gene_id "ENSG00000215302"; transcript_id "hsCircRNA-189"; exon_number "2" gene_name "CTD-3092A11.1"; gene_biotype "transcribed_unprocessed_pseudogene"; oId "lv:circCTD-3092A11.1-1020-001|ts:circCTD-3092A11.1-4393-001"; tissue "lv|ts";
15	ncSplice	exon	30484502	30484686	.	+	.	gene_id "ENSG00000215302"; transcript_id "hsCircRNA-189"; exon_number "3" gene_name "CTD-3092A11.1"; gene_biotype "transcribed_unprocessed_pseudogene"; oId "lv:circCTD-3092A11.1-1020-001|ts:circCTD-3092A11.1-4393-001"; tissue "lv|ts";
15	ncSplice	gene	49235851	49239367	.	+	.	gene_id "ENSG00000156958"; gene_name "GALK2"; gene_source "ncSplice"; gene_biotype "protein_coding";
15	ncSplice	transcript	49235851	49239367	.	+	.	gene_id "ENSG00000156958"; transcript_id "hsCircRNA-190"; gene_name "GALK2"; gene_biotype "protein_coding"; transcript_biotype "circRNA"; oId "lv:circGALK2-1042-001"; tissue "lv";
15	ncSplice	exon	49235851	49235941	.	+	.	gene_id "ENSG00000156958"; transcript_id "hsCircRNA-190"; exon_number "1" gene_name "GALK2"; gene_biotype "protein_coding"; oId "lv:circGALK2-1042-001"; tissue "lv";
15	ncSplice	exon	49239221	49239367	.	+	.	gene_id "ENSG00000156958"; transcript_id "hsCircRNA-190"; exon_number "2" gene_name "GALK2"; gene_biotype "protein_coding"; oId "lv:circGALK2-1042-001"; tissue "lv";
15	ncSplice	gene	57437985	57442478	.	+	.	gene_id "ENSG00000128849"; gene_name "CGNL1"; gene_source "ncSplice"; gene_biotype "protein_coding";
15	ncSplice	transcript	57437985	57442478	.	+	.	gene_id "ENSG00000128849"; transcript_id "hsCircRNA-191"; gene_name "CGNL1"; gene_biotype "protein_coding"; transcript_biotype "circRNA"; oId "lv:circCGNL1-1055-001"; tissue "lv";
15	ncSplice	exon	57437985	57440471	.	+	.	gene_id "ENSG00000128849"; transcript_id "hsCircRNA-191"; exon_number "1" gene_name "CGNL1"; gene_biotype "protein_coding"; oId "lv:circCGNL1-1055-001"; tissue "lv";
15	ncSplice	exon	57442373	57442478	.	+	.	gene_id "ENSG00000128849"; transcript_id "hsCircRNA-191"; exon_number "2" gene_name "CGNL1"; gene_biotype "protein_coding"; oId "lv:circCGNL1-1055-001"; tissue "lv";
15	ncSplice	gene	57451500	57453818	.	+	.	gene_id "ENSG00000128849"; gene_name "CGNL1"; gene_source "ncSplice"; gene_biotype "protein_coding";
15	ncSplice	transcript	57451500	57453818	.	+	.	gene_id "ENSG00000128849"; transcript_id "hsCircRNA-192"; gene_name "CGNL1"; gene_biotype "protein_coding"; transcript_biotype "circRNA"; oId "lv:circCGNL1-1056-001"; tissue "lv";
15	ncSplice	exon	57451500	57451601	.	+	.	gene_id "ENSG00000128849"; transcript_id "hsCircRNA-192"; exon_number "1" gene_name "CGNL1"; gene_biotype "protein_coding"; oId "lv:circCGNL1-1056-001"; tissue "lv";
15	ncSplice	exon	57452141	57452289	.	+	.	gene_id "ENSG00000128849"; transcript_id "hsCircRNA-192"; exon_number "2" gene_name "CGNL1"; gene_biotype "protein_coding"; oId "lv:circCGNL1-1056-001"; tissue "lv";
15	ncSplice	exon	57453683	57453818	.	+	.	gene_id "ENSG00000128849"; transcript_id "hsCircRNA-192"; exon_number "3" gene_name "CGNL1"; gene_biotype "protein_coding"; oId "lv:circCGNL1-1056-001"; tissue "lv";
15	ncSplice	gene	57451500	57461892	.	+	.	gene_id "ENSG00000128849"; gene_name "CGNL1"; gene_source "ncSplice"; gene_biotype "protein_coding";
15	ncSplice	transcript	57451500	57461892	.	+	.	gene_id "ENSG00000128849"; transcript_id "hsCircRNA-193"; gene_name "CGNL1"; gene_biotype "protein_coding"; transcript_biotype "circRNA"; oId "lv:circCGNL1-1057-001"; tissue "lv";
15	ncSplice	exon	57451500	57451601	.	+	.	gene_id "ENSG00000128849"; transcript_id "hsCircRNA-193"; exon_number "1" gene_name "CGNL1"; gene_biotype "protein_coding"; oId "lv:circCGNL1-1057-001"; tissue "lv";
15	ncSplice	exon	57452141	57452289	.	+	.	gene_id "ENSG00000128849"; transcript_id "hsCircRNA-193"; exon_number "2" gene_name "CGNL1"; gene_biotype "protein_coding"; oId "lv:circCGNL1-1057-001"; tissue "lv";
15	ncSplice	exon	57453683	57453818	.	+	.	gene_id "ENSG00000128849"; transcript_id "hsCircRNA-193"; exon_number "3" gene_name "CGNL1"; gene_biotype "protein_coding"; oId "lv:circCGNL1-1057-001"; tissue "lv";
15	ncSplice	exon	57461680	57461892	.	+	.	gene_id "ENSG00000128849"; transcript_id "hsCircRNA-193"; exon_number "4" gene_name "CGNL1"; gene_biotype "protein_coding"; oId "lv:circCGNL1-1057-001"; tissue "lv";
15	ncSplice	gene	58886975	58887540	.	-	.	gene_id "ENSG00000137776"; gene_name "SLTM"; gene_source "ncSplice"; gene_biotype "protein_coding";
15	ncSplice	transcript	58886975	58887540	.	-	.	gene_id "ENSG00000137776"; transcript_id "hsCircRNA-194"; gene_name "SLTM"; gene_biotype "protein_coding"; transcript_biotype "circRNA"; oId "lv:circSLTM-1059-001|ce:circSLTM-4808-001"; tissue "lv|ce";
15	ncSplice	exon	58886975	58887119	.	-	.	gene_id "ENSG00000137776"; transcript_id "hsCircRNA-194"; exon_number "1" gene_name "SLTM"; gene_biotype "protein_coding"; oId "lv:circSLTM-1059-001|ce:circSLTM-4808-001"; tissue "lv|ce";
15	ncSplice	exon	58887226	58887540	.	-	.	gene_id "ENSG00000137776"; transcript_id "hsCircRNA-194"; exon_number "2" gene_name "SLTM"; gene_biotype "protein_coding"; oId "lv:circSLTM-1059-001|ce:circSLTM-4808-001"; tissue "lv|ce";
15	ncSplice	gene	58912563	58913696	.	-	.	gene_id "ENSG00000137776"; gene_name "SLTM"; gene_source "ncSplice"; gene_biotype "protein_coding";
15	ncSplice	transcript	58912563	58913696	.	-	.	gene_id "ENSG00000137776"; transcript_id "hsCircRNA-195"; gene_name "SLTM"; gene_biotype "protein_coding"; transcript_biotype "circRNA"; oId "lv:circSLTM-1060-001"; tissue "lv";
15	ncSplice	exon	58912563	58912610	.	-	.	gene_id "ENSG00000137776"; transcript_id "hsCircRNA-195"; exon_number "1" gene_name "SLTM"; gene_biotype "protein_coding"; oId "lv:circSLTM-1060-001"; tissue "lv";
15	ncSplice	exon	58913499	58913696	.	-	.	gene_id "ENSG00000137776"; transcript_id "hsCircRNA-195"; exon_number "2" gene_name "SLTM"; gene_biotype "protein_coding"; oId "lv:circSLTM-1060-001"; tissue "lv";
15	ncSplice	gene	64112573	64123546	.	+	.	gene_id "ENSG00000028528"; gene_name "SNX1"; gene_source "ncSplice"; gene_biotype "protein_coding";
15	ncSplice	transcript	64112573	64123546	.	+	.	gene_id "ENSG00000028528"; transcript_id "hsCircRNA-196"; gene_name "SNX1"; gene_biotype "protein_coding"; transcript_biotype "circRNA"; oId "lv:circSNX1-1068-001"; tissue "lv";
15	ncSplice	exon	64112573	64115706	.	+	.	gene_id "ENSG00000028528"; transcript_id "hsCircRNA-196"; exon_number "1" gene_name "SNX1"; gene_biotype "protein_coding"; oId "lv:circSNX1-1068-001"; tissue "lv";
15	ncSplice	exon	64118117	64118244	.	+	.	gene_id "ENSG00000028528"; transcript_id "hsCircRNA-196"; exon_number "2" gene_name "SNX1"; gene_biotype "protein_coding"; oId "lv:circSNX1-1068-001"; tissue "lv";
15	ncSplice	exon	64118788	64118854	.	+	.	gene_id "ENSG00000028528"; transcript_id "hsCircRNA-196"; exon_number "3" gene_name "SNX1"; gene_biotype "protein_coding"; oId "lv:circSNX1-1068-001"; tissue "lv";
15	ncSplice	exon	64123503	64123546	.	+	.	gene_id "ENSG00000028528"; transcript_id "hsCircRNA-196"; exon_number "4" gene_name "SNX1"; gene_biotype "protein_coding"; oId "lv:circSNX1-1068-001"; tissue "lv";
15	ncSplice	gene	64118117	64118854	.	+	.	gene_id "ENSG00000028528"; gene_name "SNX1"; gene_source "ncSplice"; gene_biotype "protein_coding";
15	ncSplice	transcript	64118117	64118854	.	+	.	gene_id "ENSG00000028528"; transcript_id "hsCircRNA-197"; gene_name "SNX1"; gene_biotype "protein_coding"; transcript_biotype "circRNA"; oId "lv:circSNX1-1069-001"; tissue "lv";
15	ncSplice	exon	64118117	64118244	.	+	.	gene_id "ENSG00000028528"; transcript_id "hsCircRNA-197"; exon_number "1" gene_name "SNX1"; gene_biotype "protein_coding"; oId "lv:circSNX1-1069-001"; tissue "lv";
15	ncSplice	exon	64118788	64118854	.	+	.	gene_id "ENSG00000028528"; transcript_id "hsCircRNA-197"; exon_number "2" gene_name "SNX1"; gene_biotype "protein_coding"; oId "lv:circSNX1-1069-001"; tissue "lv";
15	ncSplice	gene	64974602	64983593	.	-	.	gene_id "ENSG00000090487"; gene_name "SPG21"; gene_source "ncSplice"; gene_biotype "protein_coding";
15	ncSplice	transcript	64974602	64983593	.	-	.	gene_id "ENSG00000090487"; transcript_id "hsCircRNA-198"; gene_name "SPG21"; gene_biotype "protein_coding"; transcript_biotype "circRNA"; oId "lv:circSPG21-1072-001|ce:circSPG21-4888-001|ts:circSPG21-4700-001"; tissue "lv|ce|ts";
15	ncSplice	exon	64974602	64974747	.	-	.	gene_id "ENSG00000090487"; transcript_id "hsCircRNA-198"; exon_number "1" gene_name "SPG21"; gene_biotype "protein_coding"; oId "lv:circSPG21-1072-001|ce:circSPG21-4888-001|ts:circSPG21-4700-001"; tissue "lv|ce|ts";
15	ncSplice	exon	64976475	64976555	.	-	.	gene_id "ENSG00000090487"; transcript_id "hsCircRNA-198"; exon_number "2" gene_name "SPG21"; gene_biotype "protein_coding"; oId "lv:circSPG21-1072-001|ce:circSPG21-4888-001|ts:circSPG21-4700-001"; tissue "lv|ce|ts";
15	ncSplice	exon	64980864	64981025	.	-	.	gene_id "ENSG00000090487"; transcript_id "hsCircRNA-198"; exon_number "3" gene_name "SPG21"; gene_biotype "protein_coding"; oId "lv:circSPG21-1072-001|ce:circSPG21-4888-001|ts:circSPG21-4700-001"; tissue "lv|ce|ts";
15	ncSplice	exon	64983507	64983593	.	-	.	gene_id "ENSG00000090487"; transcript_id "hsCircRNA-198"; exon_number "4" gene_name "SPG21"; gene_biotype "protein_coding"; oId "lv:circSPG21-1072-001|ce:circSPG21-4888-001|ts:circSPG21-4700-001"; tissue "lv|ce|ts";
15	ncSplice	gene	65178934	65180204	.	-	.	gene_id "ENSG00000166855"; gene_name "CLPX"; gene_source "ncSplice"; gene_biotype "protein_coding";
15	ncSplice	transcript	65178934	65180204	.	-	.	gene_id "ENSG00000166855"; transcript_id "hsCircRNA-199"; gene_name "CLPX"; gene_biotype "protein_coding"; transcript_biotype "circRNA"; oId "lv:circCLPX-1074-001|ce:circCLPX-4892-001|ts:circCLPX-4701-001"; tissue "lv|ce|ts";
15	ncSplice	exon	65178934	65179051	.	-	.	gene_id "ENSG00000166855"; transcript_id "hsCircRNA-199"; exon_number "1" gene_name "CLPX"; gene_biotype "protein_coding"; oId "lv:circCLPX-1074-001|ce:circCLPX-4892-001|ts:circCLPX-4701-001"; tissue "lv|ce|ts";
15	ncSplice	exon	65180044	65180204	.	-	.	gene_id "ENSG00000166855"; transcript_id "hsCircRNA-199"; exon_number "2" gene_name "CLPX"; gene_biotype "protein_coding"; oId "lv:circCLPX-1074-001|ce:circCLPX-4892-001|ts:circCLPX-4701-001"; tissue "lv|ce|ts";
15	ncSplice	gene	76274412	76295737	.	-	.	gene_id "ENSG00000140374"; gene_name "ETFA"; gene_source "ncSplice"; gene_biotype "protein_coding";
15	ncSplice	transcript	76274412	76295737	.	-	.	gene_id "ENSG00000140374"; transcript_id "hsCircRNA-200"; gene_name "ETFA"; gene_biotype "protein_coding"; transcript_biotype "circRNA"; oId "lv:circETFA-1095-005"; tissue "lv";
15	ncSplice	exon	76274412	76283825	.	-	.	gene_id "ENSG00000140374"; transcript_id "hsCircRNA-200"; exon_number "1" gene_name "ETFA"; gene_biotype "protein_coding"; oId "lv:circETFA-1095-005"; tissue "lv";
15	ncSplice	exon	76285637	76285738	.	-	.	gene_id "ENSG00000140374"; transcript_id "hsCircRNA-200"; exon_number "2" gene_name "ETFA"; gene_biotype "protein_coding"; oId "lv:circETFA-1095-005"; tissue "lv";
15	ncSplice	exon	76286371	76286481	.	-	.	gene_id "ENSG00000140374"; transcript_id "hsCircRNA-200"; exon_number "3" gene_name "ETFA"; gene_biotype "protein_coding"; oId "lv:circETFA-1095-005"; tissue "lv";
15	ncSplice	exon	76287846	76287945	.	-	.	gene_id "ENSG00000140374"; transcript_id "hsCircRNA-200"; exon_number "4" gene_name "ETFA"; gene_biotype "protein_coding"; oId "lv:circETFA-1095-005"; tissue "lv";
15	ncSplice	exon	76292431	76292513	.	-	.	gene_id "ENSG00000140374"; transcript_id "hsCircRNA-200"; exon_number "5" gene_name "ETFA"; gene_biotype "protein_coding"; oId "lv:circETFA-1095-005"; tissue "lv";
15	ncSplice	exon	76292619	76292700	.	-	.	gene_id "ENSG00000140374"; transcript_id "hsCircRNA-200"; exon_number "6" gene_name "ETFA"; gene_biotype "protein_coding"; oId "lv:circETFA-1095-005"; tissue "lv";
15	ncSplice	exon	76295591	76295737	.	-	.	gene_id "ENSG00000140374"; transcript_id "hsCircRNA-200"; exon_number "7" gene_name "ETFA"; gene_biotype "protein_coding"; oId "lv:circETFA-1095-005"; tissue "lv";
15	ncSplice	gene	76287846	76292700	.	-	.	gene_id "ENSG00000140374"; gene_name "ETFA"; gene_source "ncSplice"; gene_biotype "protein_coding";
15	ncSplice	transcript	76287846	76292700	.	-	.	gene_id "ENSG00000140374"; transcript_id "hsCircRNA-201"; gene_name "ETFA"; gene_biotype "protein_coding"; transcript_biotype "circRNA"; oId "lv:circETFA-1098-001"; tissue "lv";
15	ncSplice	exon	76287846	76287945	.	-	.	gene_id "ENSG00000140374"; transcript_id "hsCircRNA-201"; exon_number "1" gene_name "ETFA"; gene_biotype "protein_coding"; oId "lv:circETFA-1098-001"; tissue "lv";
15	ncSplice	exon	76292431	76292513	.	-	.	gene_id "ENSG00000140374"; transcript_id "hsCircRNA-201"; exon_number "2" gene_name "ETFA"; gene_biotype "protein_coding"; oId "lv:circETFA-1098-001"; tissue "lv";
15	ncSplice	exon	76292619	76292700	.	-	.	gene_id "ENSG00000140374"; transcript_id "hsCircRNA-201"; exon_number "3" gene_name "ETFA"; gene_biotype "protein_coding"; oId "lv:circETFA-1098-001"; tissue "lv";
15	ncSplice	gene	76287846	76295737	.	-	.	gene_id "ENSG00000140374"; gene_name "ETFA"; gene_source "ncSplice"; gene_biotype "protein_coding";
15	ncSplice	transcript	76287846	76295737	.	-	.	gene_id "ENSG00000140374"; transcript_id "hsCircRNA-202"; gene_name "ETFA"; gene_biotype "protein_coding"; transcript_biotype "circRNA"; oId "lv:circETFA-1099-001"; tissue "lv";
15	ncSplice	exon	76287846	76287945	.	-	.	gene_id "ENSG00000140374"; transcript_id "hsCircRNA-202"; exon_number "1" gene_name "ETFA"; gene_biotype "protein_coding"; oId "lv:circETFA-1099-001"; tissue "lv";
15	ncSplice	exon	76292431	76292513	.	-	.	gene_id "ENSG00000140374"; transcript_id "hsCircRNA-202"; exon_number "2" gene_name "ETFA"; gene_biotype "protein_coding"; oId "lv:circETFA-1099-001"; tissue "lv";
15	ncSplice	exon	76292619	76292700	.	-	.	gene_id "ENSG00000140374"; transcript_id "hsCircRNA-202"; exon_number "3" gene_name "ETFA"; gene_biotype "protein_coding"; oId "lv:circETFA-1099-001"; tissue "lv";
15	ncSplice	exon	76295591	76295737	.	-	.	gene_id "ENSG00000140374"; transcript_id "hsCircRNA-202"; exon_number "4" gene_name "ETFA"; gene_biotype "protein_coding"; oId "lv:circETFA-1099-001"; tissue "lv";
15	ncSplice	gene	76292431	76295737	.	-	.	gene_id "ENSG00000140374"; gene_name "ETFA"; gene_source "ncSplice"; gene_biotype "protein_coding";
15	ncSplice	transcript	76292431	76295737	.	-	.	gene_id "ENSG00000140374"; transcript_id "hsCircRNA-203"; gene_name "ETFA"; gene_biotype "protein_coding"; transcript_biotype "circRNA"; oId "lv:circETFA-1100-001|ce:circETFA-5041-001"; tissue "lv|ce";
15	ncSplice	exon	76292431	76292513	.	-	.	gene_id "ENSG00000140374"; transcript_id "hsCircRNA-203"; exon_number "1" gene_name "ETFA"; gene_biotype "protein_coding"; oId "lv:circETFA-1100-001|ce:circETFA-5041-001"; tissue "lv|ce";
15	ncSplice	exon	76292619	76292700	.	-	.	gene_id "ENSG00000140374"; transcript_id "hsCircRNA-203"; exon_number "2" gene_name "ETFA"; gene_biotype "protein_coding"; oId "lv:circETFA-1100-001|ce:circETFA-5041-001"; tissue "lv|ce";
15	ncSplice	exon	76295591	76295737	.	-	.	gene_id "ENSG00000140374"; transcript_id "hsCircRNA-203"; exon_number "3" gene_name "ETFA"; gene_biotype "protein_coding"; oId "lv:circETFA-1100-001|ce:circETFA-5041-001"; tissue "lv|ce";
15	ncSplice	gene	84538532	84555070	.	-	.	gene_id "ENSG00000189136"; gene_name "UBE2Q2P1"; gene_source "ncSplice"; gene_biotype "transcribed_unprocessed_pseudogene";
15	ncSplice	transcript	84538532	84555070	.	-	.	gene_id "ENSG00000189136"; transcript_id "hsCircRNA-204"; gene_name "UBE2Q2P1"; gene_biotype "transcribed_unprocessed_pseudogene"; transcript_biotype "circRNA"; oId "lv:circUBE2Q2P1-1106-002"; tissue "lv";
15	ncSplice	exon	84538532	84538616	.	-	.	gene_id "ENSG00000189136"; transcript_id "hsCircRNA-204"; exon_number "1" gene_name "UBE2Q2P1"; gene_biotype "transcribed_unprocessed_pseudogene"; oId "lv:circUBE2Q2P1-1106-002"; tissue "lv";
15	ncSplice	exon	84542145	84542284	.	-	.	gene_id "ENSG00000189136"; transcript_id "hsCircRNA-204"; exon_number "2" gene_name "UBE2Q2P1"; gene_biotype "transcribed_unprocessed_pseudogene"; oId "lv:circUBE2Q2P1-1106-002"; tissue "lv";
15	ncSplice	exon	84546221	84546277	.	-	.	gene_id "ENSG00000189136"; transcript_id "hsCircRNA-204"; exon_number "3" gene_name "UBE2Q2P1"; gene_biotype "transcribed_unprocessed_pseudogene"; oId "lv:circUBE2Q2P1-1106-002"; tissue "lv";
15	ncSplice	exon	84554966	84555070	.	-	.	gene_id "ENSG00000189136"; transcript_id "hsCircRNA-204"; exon_number "4" gene_name "UBE2Q2P1"; gene_biotype "transcribed_unprocessed_pseudogene"; oId "lv:circUBE2Q2P1-1106-002"; tissue "lv";
1	ncSplice	gene	58506060	58536741	.	-	.	gene_id "ENSG00000162600"; gene_name "OMA1"; gene_source "ncSplice"; gene_biotype "protein_coding";
1	ncSplice	transcript	58506060	58536741	.	-	.	gene_id "ENSG00000162600"; transcript_id "hsCircRNA-205"; gene_name "OMA1"; gene_biotype "protein_coding"; transcript_biotype "circRNA"; oId "lv:circOMA1-1109-001|ce:circOMA1-5094-079|ts:circOMA1-4899-023"; tissue "lv|ce|ts";
1	ncSplice	exon	58506060	58506209	.	-	.	gene_id "ENSG00000162600"; transcript_id "hsCircRNA-205"; exon_number "1" gene_name "OMA1"; gene_biotype "protein_coding"; oId "lv:circOMA1-1109-001|ce:circOMA1-5094-079|ts:circOMA1-4899-023"; tissue "lv|ce|ts";
1	ncSplice	exon	58527261	58527335	.	-	.	gene_id "ENSG00000162600"; transcript_id "hsCircRNA-205"; exon_number "2" gene_name "OMA1"; gene_biotype "protein_coding"; oId "lv:circOMA1-1109-001|ce:circOMA1-5094-079|ts:circOMA1-4899-023"; tissue "lv|ce|ts";
1	ncSplice	exon	58530601	58530729	.	-	.	gene_id "ENSG00000162600"; transcript_id "hsCircRNA-205"; exon_number "3" gene_name "OMA1"; gene_biotype "protein_coding"; oId "lv:circOMA1-1109-001|ce:circOMA1-5094-079|ts:circOMA1-4899-023"; tissue "lv|ce|ts";
1	ncSplice	exon	58533953	58534060	.	-	.	gene_id "ENSG00000162600"; transcript_id "hsCircRNA-205"; exon_number "4" gene_name "OMA1"; gene_biotype "protein_coding"; oId "lv:circOMA1-1109-001|ce:circOMA1-5094-079|ts:circOMA1-4899-023"; tissue "lv|ce|ts";
1	ncSplice	exon	58534158	58534331	.	-	.	gene_id "ENSG00000162600"; transcript_id "hsCircRNA-205"; exon_number "5" gene_name "OMA1"; gene_biotype "protein_coding"; oId "lv:circOMA1-1109-001|ce:circOMA1-5094-079|ts:circOMA1-4899-023"; tissue "lv|ce|ts";
1	ncSplice	exon	58536513	58536741	.	-	.	gene_id "ENSG00000162600"; transcript_id "hsCircRNA-205"; exon_number "6" gene_name "OMA1"; gene_biotype "protein_coding"; oId "lv:circOMA1-1109-001|ce:circOMA1-5094-079|ts:circOMA1-4899-023"; tissue "lv|ce|ts";
15	ncSplice	gene	85113873	85121014	.	+	.	gene_id "ENSG00000073417"; gene_name "PDE8A"; gene_source "ncSplice"; gene_biotype "protein_coding";
15	ncSplice	transcript	85113873	85121014	.	+	.	gene_id "ENSG00000073417"; transcript_id "hsCircRNA-206"; gene_name "PDE8A"; gene_biotype "protein_coding"; transcript_biotype "circRNA"; oId "lv:circPDE8A-1112-001|ts:circPDE8A-4904-001"; tissue "lv|ts";
15	ncSplice	exon	85113873	85114037	.	+	.	gene_id "ENSG00000073417"; transcript_id "hsCircRNA-206"; exon_number "1" gene_name "PDE8A"; gene_biotype "protein_coding"; oId "lv:circPDE8A-1112-001|ts:circPDE8A-4904-001"; tissue "lv|ts";
15	ncSplice	exon	85115439	85115487	.	+	.	gene_id "ENSG00000073417"; transcript_id "hsCircRNA-206"; exon_number "2" gene_name "PDE8A"; gene_biotype "protein_coding"; oId "lv:circPDE8A-1112-001|ts:circPDE8A-4904-001"; tissue "lv|ts";
15	ncSplice	exon	85115984	85116119	.	+	.	gene_id "ENSG00000073417"; transcript_id "hsCircRNA-206"; exon_number "3" gene_name "PDE8A"; gene_biotype "protein_coding"; oId "lv:circPDE8A-1112-001|ts:circPDE8A-4904-001"; tissue "lv|ts";
15	ncSplice	exon	85117641	85117839	.	+	.	gene_id "ENSG00000073417"; transcript_id "hsCircRNA-206"; exon_number "4" gene_name "PDE8A"; gene_biotype "protein_coding"; oId "lv:circPDE8A-1112-001|ts:circPDE8A-4904-001"; tissue "lv|ts";
15	ncSplice	exon	85120797	85121014	.	+	.	gene_id "ENSG00000073417"; transcript_id "hsCircRNA-206"; exon_number "5" gene_name "PDE8A"; gene_biotype "protein_coding"; oId "lv:circPDE8A-1112-001|ts:circPDE8A-4904-001"; tissue "lv|ts";
15	ncSplice	gene	89113725	89116521	.	+	.	gene_id "ENSG00000140526"; gene_name "ABHD2"; gene_source "ncSplice"; gene_biotype "protein_coding";
15	ncSplice	transcript	89113725	89116521	.	+	.	gene_id "ENSG00000140526"; transcript_id "hsCircRNA-207"; gene_name "ABHD2"; gene_biotype "protein_coding"; transcript_biotype "circRNA"; oId "lv:circABHD2-1115-001|ce:circABHD2-5112-001|ts:circABHD2-4930-001"; tissue "lv|ce|ts";
15	ncSplice	exon	89113725	89113824	.	+	.	gene_id "ENSG00000140526"; transcript_id "hsCircRNA-207"; exon_number "1" gene_name "ABHD2"; gene_biotype "protein_coding"; oId "lv:circABHD2-1115-001|ce:circABHD2-5112-001|ts:circABHD2-4930-001"; tissue "lv|ce|ts";
15	ncSplice	exon	89116322	89116521	.	+	.	gene_id "ENSG00000140526"; transcript_id "hsCircRNA-207"; exon_number "2" gene_name "ABHD2"; gene_biotype "protein_coding"; oId "lv:circABHD2-1115-001|ce:circABHD2-5112-001|ts:circABHD2-4930-001"; tissue "lv|ce|ts";
15	ncSplice	gene	92924321	92929091	.	+	.	gene_id "ENSG00000173575"; gene_name "CHD2"; gene_source "ncSplice"; gene_biotype "protein_coding";
15	ncSplice	transcript	92924321	92929091	.	+	.	gene_id "ENSG00000173575"; transcript_id "hsCircRNA-208"; gene_name "CHD2"; gene_biotype "protein_coding"; transcript_biotype "circRNA"; oId "lv:circCHD2-1124-001|ce:circCHD2-5146-001"; tissue "lv|ce";
15	ncSplice	exon	92924321	92924552	.	+	.	gene_id "ENSG00000173575"; transcript_id "hsCircRNA-208"; exon_number "1" gene_name "CHD2"; gene_biotype "protein_coding"; oId "lv:circCHD2-1124-001|ce:circCHD2-5146-001"; tissue "lv|ce";
15	ncSplice	exon	92927244	92927330	.	+	.	gene_id "ENSG00000173575"; transcript_id "hsCircRNA-208"; exon_number "2" gene_name "CHD2"; gene_biotype "protein_coding"; oId "lv:circCHD2-1124-001|ce:circCHD2-5146-001"; tissue "lv|ce";
15	ncSplice	exon	92929030	92929091	.	+	.	gene_id "ENSG00000173575"; transcript_id "hsCircRNA-208"; exon_number "3" gene_name "CHD2"; gene_biotype "protein_coding"; oId "lv:circCHD2-1124-001|ce:circCHD2-5146-001"; tissue "lv|ce";
15	ncSplice	gene	92996957	92998621	.	+	.	gene_id "ENSG00000173575"; gene_name "CHD2"; gene_source "ncSplice"; gene_biotype "protein_coding";
15	ncSplice	transcript	92996957	92998621	.	+	.	gene_id "ENSG00000173575"; transcript_id "hsCircRNA-209"; gene_name "CHD2"; gene_biotype "protein_coding"; transcript_biotype "circRNA"; oId "lv:circCHD2-1130-001|ce:circCHD2-5155-003|ts:circCHD2-4972-002"; tissue "lv|ce|ts";
15	ncSplice	exon	92996957	92997095	.	+	.	gene_id "ENSG00000173575"; transcript_id "hsCircRNA-209"; exon_number "1" gene_name "CHD2"; gene_biotype "protein_coding"; oId "lv:circCHD2-1130-001|ce:circCHD2-5155-003|ts:circCHD2-4972-002"; tissue "lv|ce|ts";
15	ncSplice	exon	92997253	92997403	.	+	.	gene_id "ENSG00000173575"; transcript_id "hsCircRNA-209"; exon_number "2" gene_name "CHD2"; gene_biotype "protein_coding"; oId "lv:circCHD2-1130-001|ce:circCHD2-5155-003|ts:circCHD2-4972-002"; tissue "lv|ce|ts";
15	ncSplice	exon	92998499	92998621	.	+	.	gene_id "ENSG00000173575"; transcript_id "hsCircRNA-209"; exon_number "3" gene_name "CHD2"; gene_biotype "protein_coding"; oId "lv:circCHD2-1130-001|ce:circCHD2-5155-003|ts:circCHD2-4972-002"; tissue "lv|ce|ts";
1	ncSplice	gene	59321536	59346398	.	+	.	gene_id "ENSG00000172456"; gene_name "FGGY"; gene_source "ncSplice"; gene_biotype "protein_coding";
1	ncSplice	transcript	59321536	59346398	.	+	.	gene_id "ENSG00000172456"; transcript_id "hsCircRNA-210"; gene_name "FGGY"; gene_biotype "protein_coding"; transcript_biotype "circRNA"; oId "lv:circFGGY-1133-003|ce:circFGGY-5163-027|ts:circFGGY-4975-025"; tissue "lv|ce|ts";
1	ncSplice	exon	59321536	59321750	.	+	.	gene_id "ENSG00000172456"; transcript_id "hsCircRNA-210"; exon_number "1" gene_name "FGGY"; gene_biotype "protein_coding"; oId "lv:circFGGY-1133-003|ce:circFGGY-5163-027|ts:circFGGY-4975-025"; tissue "lv|ce|ts";
1	ncSplice	exon	59339958	59340069	.	+	.	gene_id "ENSG00000172456"; transcript_id "hsCircRNA-210"; exon_number "2" gene_name "FGGY"; gene_biotype "protein_coding"; oId "lv:circFGGY-1133-003|ce:circFGGY-5163-027|ts:circFGGY-4975-025"; tissue "lv|ce|ts";
1	ncSplice	exon	59346247	59346398	.	+	.	gene_id "ENSG00000172456"; transcript_id "hsCircRNA-210"; exon_number "3" gene_name "FGGY"; gene_biotype "protein_coding"; oId "lv:circFGGY-1133-003|ce:circFGGY-5163-027|ts:circFGGY-4975-025"; tissue "lv|ce|ts";
1	ncSplice	gene	59321536	59378837	.	+	.	gene_id "ENSG00000172456"; gene_name "FGGY"; gene_source "ncSplice"; gene_biotype "protein_coding";
1	ncSplice	transcript	59321536	59378837	.	+	.	gene_id "ENSG00000172456"; transcript_id "hsCircRNA-211"; gene_name "FGGY"; gene_biotype "protein_coding"; transcript_biotype "circRNA"; oId "lv:circFGGY-1134-003|ce:circFGGY-5164-140|ts:circFGGY-4976-100"; tissue "lv|ce|ts";
1	ncSplice	exon	59321536	59321750	.	+	.	gene_id "ENSG00000172456"; transcript_id "hsCircRNA-211"; exon_number "1" gene_name "FGGY"; gene_biotype "protein_coding"; oId "lv:circFGGY-1134-003|ce:circFGGY-5164-140|ts:circFGGY-4976-100"; tissue "lv|ce|ts";
1	ncSplice	exon	59339958	59340069	.	+	.	gene_id "ENSG00000172456"; transcript_id "hsCircRNA-211"; exon_number "2" gene_name "FGGY"; gene_biotype "protein_coding"; oId "lv:circFGGY-1134-003|ce:circFGGY-5164-140|ts:circFGGY-4976-100"; tissue "lv|ce|ts";
1	ncSplice	exon	59346247	59346398	.	+	.	gene_id "ENSG00000172456"; transcript_id "hsCircRNA-211"; exon_number "3" gene_name "FGGY"; gene_biotype "protein_coding"; oId "lv:circFGGY-1134-003|ce:circFGGY-5164-140|ts:circFGGY-4976-100"; tissue "lv|ce|ts";
1	ncSplice	exon	59378749	59378837	.	+	.	gene_id "ENSG00000172456"; transcript_id "hsCircRNA-211"; exon_number "4" gene_name "FGGY"; gene_biotype "protein_coding"; oId "lv:circFGGY-1134-003|ce:circFGGY-5164-140|ts:circFGGY-4976-100"; tissue "lv|ce|ts";
1	ncSplice	gene	59339958	59378837	.	+	.	gene_id "ENSG00000172456"; gene_name "FGGY"; gene_source "ncSplice"; gene_biotype "protein_coding";
1	ncSplice	transcript	59339958	59378837	.	+	.	gene_id "ENSG00000172456"; transcript_id "hsCircRNA-212"; gene_name "FGGY"; gene_biotype "protein_coding"; transcript_biotype "circRNA"; oId "lv:circFGGY-1136-001"; tissue "lv";
1	ncSplice	exon	59339958	59345046	.	+	.	gene_id "ENSG00000172456"; transcript_id "hsCircRNA-212"; exon_number "1" gene_name "FGGY"; gene_biotype "protein_coding"; oId "lv:circFGGY-1136-001"; tissue "lv";
1	ncSplice	exon	59346247	59346398	.	+	.	gene_id "ENSG00000172456"; transcript_id "hsCircRNA-212"; exon_number "2" gene_name "FGGY"; gene_biotype "protein_coding"; oId "lv:circFGGY-1136-001"; tissue "lv";
1	ncSplice	exon	59378749	59378837	.	+	.	gene_id "ENSG00000172456"; transcript_id "hsCircRNA-212"; exon_number "3" gene_name "FGGY"; gene_biotype "protein_coding"; oId "lv:circFGGY-1136-001"; tissue "lv";
16	ncSplice	gene	11894954	11896785	.	-	.	gene_id "ENSG00000103342"; gene_name "GSPT1"; gene_source "ncSplice"; gene_biotype "protein_coding";
16	ncSplice	transcript	11894954	11896785	.	-	.	gene_id "ENSG00000103342"; transcript_id "hsCircRNA-213"; gene_name "GSPT1"; gene_biotype "protein_coding"; transcript_biotype "circRNA"; oId "lv:circGSPT1-1151-001|ce:circGSPT1-5197-001"; tissue "lv|ce";
16	ncSplice	exon	11894954	11894987	.	-	.	gene_id "ENSG00000103342"; transcript_id "hsCircRNA-213"; exon_number "1" gene_name "GSPT1"; gene_biotype "protein_coding"; oId "lv:circGSPT1-1151-001|ce:circGSPT1-5197-001"; tissue "lv|ce";
16	ncSplice	exon	11896558	11896785	.	-	.	gene_id "ENSG00000103342"; transcript_id "hsCircRNA-213"; exon_number "2" gene_name "GSPT1"; gene_biotype "protein_coding"; oId "lv:circGSPT1-1151-001|ce:circGSPT1-5197-001"; tissue "lv|ce";
16	ncSplice	gene	1809238	1809833	.	-	.	gene_id "ENSG00000063854"; gene_name "HAGH"; gene_source "ncSplice"; gene_biotype "protein_coding";
16	ncSplice	transcript	1809238	1809833	.	-	.	gene_id "ENSG00000063854"; transcript_id "hsCircRNA-214"; gene_name "HAGH"; gene_biotype "protein_coding"; transcript_biotype "circRNA"; oId "lv:circHAGH-1160-001|ce:circHAGH-5246-001|ts:circHAGH-5099-001"; tissue "lv|ce|ts";
16	ncSplice	exon	1809238	1809446	.	-	.	gene_id "ENSG00000063854"; transcript_id "hsCircRNA-214"; exon_number "1" gene_name "HAGH"; gene_biotype "protein_coding"; oId "lv:circHAGH-1160-001|ce:circHAGH-5246-001|ts:circHAGH-5099-001"; tissue "lv|ce|ts";
16	ncSplice	exon	1809754	1809833	.	-	.	gene_id "ENSG00000063854"; transcript_id "hsCircRNA-214"; exon_number "2" gene_name "HAGH"; gene_biotype "protein_coding"; oId "lv:circHAGH-1160-001|ce:circHAGH-5246-001|ts:circHAGH-5099-001"; tissue "lv|ce|ts";
1	ncSplice	gene	61899583	61901459	.	+	.	gene_id "ENSG00000132849"; gene_name "INADL"; gene_source "ncSplice"; gene_biotype "protein_coding";
1	ncSplice	transcript	61899583	61901459	.	+	.	gene_id "ENSG00000132849"; transcript_id "hsCircRNA-215"; gene_name "INADL"; gene_biotype "protein_coding"; transcript_biotype "circRNA"; oId "lv:circINADL-1166-001|ce:circINADL-5262-001"; tissue "lv|ce";
1	ncSplice	exon	61899583	61899654	.	+	.	gene_id "ENSG00000132849"; transcript_id "hsCircRNA-215"; exon_number "1" gene_name "INADL"; gene_biotype "protein_coding"; oId "lv:circINADL-1166-001|ce:circINADL-5262-001"; tissue "lv|ce";
1	ncSplice	exon	61901282	61901459	.	+	.	gene_id "ENSG00000132849"; transcript_id "hsCircRNA-215"; exon_number "2" gene_name "INADL"; gene_biotype "protein_coding"; oId "lv:circINADL-1166-001|ce:circINADL-5262-001"; tissue "lv|ce";
16	ncSplice	gene	27213585	27215008	.	+	.	gene_id "ENSG00000155666"; gene_name "KDM8"; gene_source "ncSplice"; gene_biotype "protein_coding";
16	ncSplice	transcript	27213585	27215008	.	+	.	gene_id "ENSG00000155666"; transcript_id "hsCircRNA-216"; gene_name "KDM8"; gene_biotype "protein_coding"; transcript_biotype "circRNA"; oId "lv:circKDM8-1181-001|ce:circKDM8-5346-001"; tissue "lv|ce";
16	ncSplice	exon	27213585	27213751	.	+	.	gene_id "ENSG00000155666"; transcript_id "hsCircRNA-216"; exon_number "1" gene_name "KDM8"; gene_biotype "protein_coding"; oId "lv:circKDM8-1181-001|ce:circKDM8-5346-001"; tissue "lv|ce";
16	ncSplice	exon	27214876	27215008	.	+	.	gene_id "ENSG00000155666"; transcript_id "hsCircRNA-216"; exon_number "2" gene_name "KDM8"; gene_biotype "protein_coding"; oId "lv:circKDM8-1181-001|ce:circKDM8-5346-001"; tissue "lv|ce";
16	ncSplice	gene	31722626	31723353	.	+	.	gene_id "ENSG00000197302"; gene_name "ZNF720"; gene_source "ncSplice"; gene_biotype "protein_coding";
16	ncSplice	transcript	31722626	31723353	.	+	.	gene_id "ENSG00000197302"; transcript_id "hsCircRNA-217"; gene_name "ZNF720"; gene_biotype "protein_coding"; transcript_biotype "circRNA"; oId "lv:circZNF720-1192-001|ce:circZNF720-5378-001|ts:circZNF720-5239-001"; tissue "lv|ce|ts";
16	ncSplice	exon	31722626	31722752	.	+	.	gene_id "ENSG00000197302"; transcript_id "hsCircRNA-217"; exon_number "1" gene_name "ZNF720"; gene_biotype "protein_coding"; oId "lv:circZNF720-1192-001|ce:circZNF720-5378-001|ts:circZNF720-5239-001"; tissue "lv|ce|ts";
16	ncSplice	exon	31723258	31723353	.	+	.	gene_id "ENSG00000197302"; transcript_id "hsCircRNA-217"; exon_number "2" gene_name "ZNF720"; gene_biotype "protein_coding"; oId "lv:circZNF720-1192-001|ce:circZNF720-5378-001|ts:circZNF720-5239-001"; tissue "lv|ce|ts";
16	ncSplice	gene	47497399	47515601	.	+	.	gene_id "ENSG00000102893"; gene_name "PHKB"; gene_source "ncSplice"; gene_biotype "protein_coding";
16	ncSplice	transcript	47497399	47515601	.	+	.	gene_id "ENSG00000102893"; transcript_id "hsCircRNA-218"; gene_name "PHKB"; gene_biotype "protein_coding"; transcript_biotype "circRNA"; oId "lv:circPHKB-1200-001|ce:circPHKB-5418-003|ts:circPHKB-5287-002"; tissue "lv|ce|ts";
16	ncSplice	exon	47497399	47497488	.	+	.	gene_id "ENSG00000102893"; transcript_id "hsCircRNA-218"; exon_number "1" gene_name "PHKB"; gene_biotype "protein_coding"; oId "lv:circPHKB-1200-001|ce:circPHKB-5418-003|ts:circPHKB-5287-002"; tissue "lv|ce|ts";
16	ncSplice	exon	47499756	47499894	.	+	.	gene_id "ENSG00000102893"; transcript_id "hsCircRNA-218"; exon_number "2" gene_name "PHKB"; gene_biotype "protein_coding"; oId "lv:circPHKB-1200-001|ce:circPHKB-5418-003|ts:circPHKB-5287-002"; tissue "lv|ce|ts";
16	ncSplice	exon	47502991	47503090	.	+	.	gene_id "ENSG00000102893"; transcript_id "hsCircRNA-218"; exon_number "3" gene_name "PHKB"; gene_biotype "protein_coding"; oId "lv:circPHKB-1200-001|ce:circPHKB-5418-003|ts:circPHKB-5287-002"; tissue "lv|ce|ts";
16	ncSplice	exon	47511665	47511772	.	+	.	gene_id "ENSG00000102893"; transcript_id "hsCircRNA-218"; exon_number "4" gene_name "PHKB"; gene_biotype "protein_coding"; oId "lv:circPHKB-1200-001|ce:circPHKB-5418-003|ts:circPHKB-5287-002"; tissue "lv|ce|ts";
16	ncSplice	exon	47515521	47515601	.	+	.	gene_id "ENSG00000102893"; transcript_id "hsCircRNA-218"; exon_number "5" gene_name "PHKB"; gene_biotype "protein_coding"; oId "lv:circPHKB-1200-001|ce:circPHKB-5418-003|ts:circPHKB-5287-002"; tissue "lv|ce|ts";
16	ncSplice	gene	47497399	47547548	.	+	.	gene_id "ENSG00000102893"; gene_name "PHKB"; gene_source "ncSplice"; gene_biotype "protein_coding";
16	ncSplice	transcript	47497399	47547548	.	+	.	gene_id "ENSG00000102893"; transcript_id "hsCircRNA-219"; gene_name "PHKB"; gene_biotype "protein_coding"; transcript_biotype "circRNA"; oId "lv:circPHKB-1201-001|ce:circPHKB-5419-003|ts:circPHKB-5288-002"; tissue "lv|ce|ts";
16	ncSplice	exon	47497399	47497488	.	+	.	gene_id "ENSG00000102893"; transcript_id "hsCircRNA-219"; exon_number "1" gene_name "PHKB"; gene_biotype "protein_coding"; oId "lv:circPHKB-1201-001|ce:circPHKB-5419-003|ts:circPHKB-5288-002"; tissue "lv|ce|ts";
16	ncSplice	exon	47499756	47499894	.	+	.	gene_id "ENSG00000102893"; transcript_id "hsCircRNA-219"; exon_number "2" gene_name "PHKB"; gene_biotype "protein_coding"; oId "lv:circPHKB-1201-001|ce:circPHKB-5419-003|ts:circPHKB-5288-002"; tissue "lv|ce|ts";
16	ncSplice	exon	47502991	47503090	.	+	.	gene_id "ENSG00000102893"; transcript_id "hsCircRNA-219"; exon_number "3" gene_name "PHKB"; gene_biotype "protein_coding"; oId "lv:circPHKB-1201-001|ce:circPHKB-5419-003|ts:circPHKB-5288-002"; tissue "lv|ce|ts";
16	ncSplice	exon	47511665	47511772	.	+	.	gene_id "ENSG00000102893"; transcript_id "hsCircRNA-219"; exon_number "4" gene_name "PHKB"; gene_biotype "protein_coding"; oId "lv:circPHKB-1201-001|ce:circPHKB-5419-003|ts:circPHKB-5288-002"; tissue "lv|ce|ts";
16	ncSplice	exon	47515521	47515601	.	+	.	gene_id "ENSG00000102893"; transcript_id "hsCircRNA-219"; exon_number "5" gene_name "PHKB"; gene_biotype "protein_coding"; oId "lv:circPHKB-1201-001|ce:circPHKB-5419-003|ts:circPHKB-5288-002"; tissue "lv|ce|ts";
16	ncSplice	exon	47547433	47547548	.	+	.	gene_id "ENSG00000102893"; transcript_id "hsCircRNA-219"; exon_number "6" gene_name "PHKB"; gene_biotype "protein_coding"; oId "lv:circPHKB-1201-001|ce:circPHKB-5419-003|ts:circPHKB-5288-002"; tissue "lv|ce|ts";
16	ncSplice	gene	48277338	48303305	.	+	.	gene_id "ENSG00000102910"; gene_name "LONP2"; gene_source "ncSplice"; gene_biotype "protein_coding";
16	ncSplice	transcript	48277338	48303305	.	+	.	gene_id "ENSG00000102910"; transcript_id "hsCircRNA-220"; gene_name "LONP2"; gene_biotype "protein_coding"; transcript_biotype "circRNA"; oId "lv:circLONP2-1203-001"; tissue "lv";
16	ncSplice	exon	48277338	48277479	.	+	.	gene_id "ENSG00000102910"; transcript_id "hsCircRNA-220"; exon_number "1" gene_name "LONP2"; gene_biotype "protein_coding"; oId "lv:circLONP2-1203-001"; tissue "lv";
16	ncSplice	exon	48296015	48296165	.	+	.	gene_id "ENSG00000102910"; transcript_id "hsCircRNA-220"; exon_number "2" gene_name "LONP2"; gene_biotype "protein_coding"; oId "lv:circLONP2-1203-001"; tissue "lv";
16	ncSplice	exon	48299662	48299788	.	+	.	gene_id "ENSG00000102910"; transcript_id "hsCircRNA-220"; exon_number "3" gene_name "LONP2"; gene_biotype "protein_coding"; oId "lv:circLONP2-1203-001"; tissue "lv";
16	ncSplice	exon	48303172	48303305	.	+	.	gene_id "ENSG00000102910"; transcript_id "hsCircRNA-220"; exon_number "4" gene_name "LONP2"; gene_biotype "protein_coding"; oId "lv:circLONP2-1203-001"; tissue "lv";
16	ncSplice	gene	48347507	48348290	.	+	.	gene_id "ENSG00000102910"; gene_name "LONP2"; gene_source "ncSplice"; gene_biotype "protein_coding";
16	ncSplice	transcript	48347507	48348290	.	+	.	gene_id "ENSG00000102910"; transcript_id "hsCircRNA-221"; gene_name "LONP2"; gene_biotype "protein_coding"; transcript_biotype "circRNA"; oId "lv:circLONP2-1204-001"; tissue "lv";
16	ncSplice	exon	48347507	48347714	.	+	.	gene_id "ENSG00000102910"; transcript_id "hsCircRNA-221"; exon_number "1" gene_name "LONP2"; gene_biotype "protein_coding"; oId "lv:circLONP2-1204-001"; tissue "lv";
16	ncSplice	exon	48348100	48348290	.	+	.	gene_id "ENSG00000102910"; transcript_id "hsCircRNA-221"; exon_number "2" gene_name "LONP2"; gene_biotype "protein_coding"; oId "lv:circLONP2-1204-001"; tissue "lv";
16	ncSplice	gene	53873786	53888951	.	+	.	gene_id "ENSG00000140718"; gene_name "FTO"; gene_source "ncSplice"; gene_biotype "protein_coding";
16	ncSplice	transcript	53873786	53888951	.	+	.	gene_id "ENSG00000140718"; transcript_id "hsCircRNA-222"; gene_name "FTO"; gene_biotype "protein_coding"; transcript_biotype "circRNA"; oId "lv:circFTO-1210-001|ce:circFTO-5496-006"; tissue "lv|ce";
16	ncSplice	exon	53873786	53873865	.	+	.	gene_id "ENSG00000140718"; transcript_id "hsCircRNA-222"; exon_number "1" gene_name "FTO"; gene_biotype "protein_coding"; oId "lv:circFTO-1210-001|ce:circFTO-5496-006"; tissue "lv|ce";
16	ncSplice	exon	53879844	53879987	.	+	.	gene_id "ENSG00000140718"; transcript_id "hsCircRNA-222"; exon_number "2" gene_name "FTO"; gene_biotype "protein_coding"; oId "lv:circFTO-1210-001|ce:circFTO-5496-006"; tissue "lv|ce";
16	ncSplice	exon	53888832	53888951	.	+	.	gene_id "ENSG00000140718"; transcript_id "hsCircRNA-222"; exon_number "3" gene_name "FTO"; gene_biotype "protein_coding"; oId "lv:circFTO-1210-001|ce:circFTO-5496-006"; tissue "lv|ce";
16	ncSplice	gene	56351384	56355081	.	+	.	gene_id "ENSG00000087258"; gene_name "GNAO1"; gene_source "ncSplice"; gene_biotype "protein_coding";
16	ncSplice	transcript	56351384	56355081	.	+	.	gene_id "ENSG00000087258"; transcript_id "hsCircRNA-223"; gene_name "GNAO1"; gene_biotype "protein_coding"; transcript_biotype "circRNA"; oId "lv:circGNAO1-1212-001|ce:circGNAO1-5502-001"; tissue "lv|ce";
16	ncSplice	exon	56351384	56351537	.	+	.	gene_id "ENSG00000087258"; transcript_id "hsCircRNA-223"; exon_number "1" gene_name "GNAO1"; gene_biotype "protein_coding"; oId "lv:circGNAO1-1212-001|ce:circGNAO1-5502-001"; tissue "lv|ce";
16	ncSplice	exon	56354866	56355081	.	+	.	gene_id "ENSG00000087258"; transcript_id "hsCircRNA-223"; exon_number "2" gene_name "GNAO1"; gene_biotype "protein_coding"; oId "lv:circGNAO1-1212-001|ce:circGNAO1-5502-001"; tissue "lv|ce";
16	ncSplice	gene	57164001	57173869	.	-	.	gene_id "ENSG00000172775"; gene_name "FAM192A"; gene_source "ncSplice"; gene_biotype "protein_coding";
16	ncSplice	transcript	57164001	57173869	.	-	.	gene_id "ENSG00000172775"; transcript_id "hsCircRNA-224"; gene_name "FAM192A"; gene_biotype "protein_coding"; transcript_biotype "circRNA"; oId "lv:circFAM192A-1215-002|ce:circFAM192A-5508-002|ts:circFAM192A-5343-002"; tissue "lv|ce|ts";
16	ncSplice	exon	57164001	57164065	.	-	.	gene_id "ENSG00000172775"; transcript_id "hsCircRNA-224"; exon_number "1" gene_name "FAM192A"; gene_biotype "protein_coding"; oId "lv:circFAM192A-1215-002|ce:circFAM192A-5508-002|ts:circFAM192A-5343-002"; tissue "lv|ce|ts";
16	ncSplice	exon	57167093	57167226	.	-	.	gene_id "ENSG00000172775"; transcript_id "hsCircRNA-224"; exon_number "2" gene_name "FAM192A"; gene_biotype "protein_coding"; oId "lv:circFAM192A-1215-002|ce:circFAM192A-5508-002|ts:circFAM192A-5343-002"; tissue "lv|ce|ts";
16	ncSplice	exon	57172251	57172372	.	-	.	gene_id "ENSG00000172775"; transcript_id "hsCircRNA-224"; exon_number "3" gene_name "FAM192A"; gene_biotype "protein_coding"; oId "lv:circFAM192A-1215-002|ce:circFAM192A-5508-002|ts:circFAM192A-5343-002"; tissue "lv|ce|ts";
16	ncSplice	exon	57172776	57172874	.	-	.	gene_id "ENSG00000172775"; transcript_id "hsCircRNA-224"; exon_number "4" gene_name "FAM192A"; gene_biotype "protein_coding"; oId "lv:circFAM192A-1215-002|ce:circFAM192A-5508-002|ts:circFAM192A-5343-002"; tissue "lv|ce|ts";
16	ncSplice	exon	57173728	57173869	.	-	.	gene_id "ENSG00000172775"; transcript_id "hsCircRNA-224"; exon_number "5" gene_name "FAM192A"; gene_biotype "protein_coding"; oId "lv:circFAM192A-1215-002|ce:circFAM192A-5508-002|ts:circFAM192A-5343-002"; tissue "lv|ce|ts";
16	ncSplice	gene	66938037	66939358	.	+	.	gene_id "ENSG00000172831"; gene_name "CES2"; gene_source "ncSplice"; gene_biotype "protein_coding";
16	ncSplice	transcript	66938037	66939358	.	+	.	gene_id "ENSG00000172831"; transcript_id "hsCircRNA-225"; gene_name "CES2"; gene_biotype "protein_coding"; transcript_biotype "circRNA"; oId "lv:circCES2-1217-001"; tissue "lv";
16	ncSplice	exon	66938037	66938241	.	+	.	gene_id "ENSG00000172831"; transcript_id "hsCircRNA-225"; exon_number "1" gene_name "CES2"; gene_biotype "protein_coding"; oId "lv:circCES2-1217-001"; tissue "lv";
16	ncSplice	exon	66939217	66939358	.	+	.	gene_id "ENSG00000172831"; transcript_id "hsCircRNA-225"; exon_number "2" gene_name "CES2"; gene_biotype "protein_coding"; oId "lv:circCES2-1217-001"; tissue "lv";
16	ncSplice	gene	68121987	68126610	.	+	.	gene_id "ENSG00000072736"; gene_name "NFATC3"; gene_source "ncSplice"; gene_biotype "protein_coding";
16	ncSplice	transcript	68121987	68126610	.	+	.	gene_id "ENSG00000072736"; transcript_id "hsCircRNA-226"; gene_name "NFATC3"; gene_biotype "protein_coding"; transcript_biotype "circRNA"; oId "lv:circNFATC3-1223-001|ce:circNFATC3-5549-001|ts:circNFATC3-5396-001"; tissue "lv|ce|ts";
16	ncSplice	exon	68121987	68123121	.	+	.	gene_id "ENSG00000072736"; transcript_id "hsCircRNA-226"; exon_number "1" gene_name "NFATC3"; gene_biotype "protein_coding"; oId "lv:circNFATC3-1223-001|ce:circNFATC3-5549-001|ts:circNFATC3-5396-001"; tissue "lv|ce|ts";
16	ncSplice	exon	68126448	68126610	.	+	.	gene_id "ENSG00000072736"; transcript_id "hsCircRNA-226"; exon_number "2" gene_name "NFATC3"; gene_biotype "protein_coding"; oId "lv:circNFATC3-1223-001|ce:circNFATC3-5549-001|ts:circNFATC3-5396-001"; tissue "lv|ce|ts";
1	ncSplice	gene	66891154	66905375	.	-	.	gene_id "ENSG00000152763"; gene_name "WDR78"; gene_source "ncSplice"; gene_biotype "protein_coding";
1	ncSplice	transcript	66891154	66905375	.	-	.	gene_id "ENSG00000152763"; transcript_id "hsCircRNA-227"; gene_name "WDR78"; gene_biotype "protein_coding"; transcript_biotype "circRNA"; oId "lv:circWDR78-1227-001|ce:circWDR78-5575-002|ts:circWDR78-5416-004"; tissue "lv|ce|ts";
1	ncSplice	exon	66891154	66891266	.	-	.	gene_id "ENSG00000152763"; transcript_id "hsCircRNA-227"; exon_number "1" gene_name "WDR78"; gene_biotype "protein_coding"; oId "lv:circWDR78-1227-001|ce:circWDR78-5575-002|ts:circWDR78-5416-004"; tissue "lv|ce|ts";
1	ncSplice	exon	66893229	66893413	.	-	.	gene_id "ENSG00000152763"; transcript_id "hsCircRNA-227"; exon_number "2" gene_name "WDR78"; gene_biotype "protein_coding"; oId "lv:circWDR78-1227-001|ce:circWDR78-5575-002|ts:circWDR78-5416-004"; tissue "lv|ce|ts";
1	ncSplice	exon	66905201	66905375	.	-	.	gene_id "ENSG00000152763"; transcript_id "hsCircRNA-227"; exon_number "3" gene_name "WDR78"; gene_biotype "protein_coding"; oId "lv:circWDR78-1227-001|ce:circWDR78-5575-002|ts:circWDR78-5416-004"; tissue "lv|ce|ts";
16	ncSplice	gene	69370483	69372355	.	-	.	gene_id "ENSG00000132604"; gene_name "TERF2"; gene_source "ncSplice"; gene_biotype "protein_coding";
16	ncSplice	transcript	69370483	69372355	.	-	.	gene_id "ENSG00000132604"; transcript_id "hsCircRNA-228"; gene_name "TERF2"; gene_biotype "protein_coding"; transcript_biotype "circRNA"; oId "lv:circTERF2-1231-001"; tissue "lv";
16	ncSplice	exon	69370483	69370629	.	-	.	gene_id "ENSG00000132604"; transcript_id "hsCircRNA-228"; exon_number "1" gene_name "TERF2"; gene_biotype "protein_coding"; oId "lv:circTERF2-1231-001"; tissue "lv";
16	ncSplice	exon	69372269	69372355	.	-	.	gene_id "ENSG00000132604"; transcript_id "hsCircRNA-228"; exon_number "2" gene_name "TERF2"; gene_biotype "protein_coding"; oId "lv:circTERF2-1231-001"; tissue "lv";
16	ncSplice	gene	70042351	70043003	.	-	.	gene_id "ENSG00000196696"; gene_name "PDXDC2P"; gene_source "ncSplice"; gene_biotype "processed_transcript";
16	ncSplice	transcript	70042351	70043003	.	-	.	gene_id "ENSG00000196696"; transcript_id "hsCircRNA-229"; gene_name "PDXDC2P"; gene_biotype "processed_transcript"; transcript_biotype "circRNA"; oId "lv:circPDXDC2P-1235-001|ce:circPDXDC2P-5595-001"; tissue "lv|ce";
16	ncSplice	exon	70042351	70042416	.	-	.	gene_id "ENSG00000196696"; transcript_id "hsCircRNA-229"; exon_number "1" gene_name "PDXDC2P"; gene_biotype "processed_transcript"; oId "lv:circPDXDC2P-1235-001|ce:circPDXDC2P-5595-001"; tissue "lv|ce";
16	ncSplice	exon	70042930	70043003	.	-	.	gene_id "ENSG00000196696"; transcript_id "hsCircRNA-229"; exon_number "2" gene_name "PDXDC2P"; gene_biotype "processed_transcript"; oId "lv:circPDXDC2P-1235-001|ce:circPDXDC2P-5595-001"; tissue "lv|ce";
16	ncSplice	gene	87901912	87902520	.	-	.	gene_id "ENSG00000174990"; gene_name "CA5A"; gene_source "ncSplice"; gene_biotype "protein_coding";
16	ncSplice	transcript	87901912	87902520	.	-	.	gene_id "ENSG00000174990"; transcript_id "hsCircRNA-230"; gene_name "CA5A"; gene_biotype "protein_coding"; transcript_biotype "circRNA"; oId "lv:circCA5A-1260-001"; tissue "lv";
16	ncSplice	exon	87901912	87901974	.	-	.	gene_id "ENSG00000174990"; transcript_id "hsCircRNA-230"; exon_number "1" gene_name "CA5A"; gene_biotype "protein_coding"; oId "lv:circCA5A-1260-001"; tissue "lv";
16	ncSplice	exon	87902425	87902520	.	-	.	gene_id "ENSG00000174990"; transcript_id "hsCircRNA-230"; exon_number "2" gene_name "CA5A"; gene_biotype "protein_coding"; oId "lv:circCA5A-1260-001"; tissue "lv";
16	ncSplice	gene	88027483	88038011	.	+	.	gene_id "ENSG00000172530"; gene_name "BANP"; gene_source "ncSplice"; gene_biotype "protein_coding";
16	ncSplice	transcript	88027483	88038011	.	+	.	gene_id "ENSG00000172530"; transcript_id "hsCircRNA-231"; gene_name "BANP"; gene_biotype "protein_coding"; transcript_biotype "circRNA"; oId "lv:circBANP-1266-001"; tissue "lv";
16	ncSplice	exon	88027483	88027650	.	+	.	gene_id "ENSG00000172530"; transcript_id "hsCircRNA-231"; exon_number "1" gene_name "BANP"; gene_biotype "protein_coding"; oId "lv:circBANP-1266-001"; tissue "lv";
16	ncSplice	exon	88033109	88033245	.	+	.	gene_id "ENSG00000172530"; transcript_id "hsCircRNA-231"; exon_number "2" gene_name "BANP"; gene_biotype "protein_coding"; oId "lv:circBANP-1266-001"; tissue "lv";
16	ncSplice	exon	88035323	88035394	.	+	.	gene_id "ENSG00000172530"; transcript_id "hsCircRNA-231"; exon_number "3" gene_name "BANP"; gene_biotype "protein_coding"; oId "lv:circBANP-1266-001"; tissue "lv";
16	ncSplice	exon	88037973	88038011	.	+	.	gene_id "ENSG00000172530"; transcript_id "hsCircRNA-231"; exon_number "4" gene_name "BANP"; gene_biotype "protein_coding"; oId "lv:circBANP-1266-001"; tissue "lv";
16	ncSplice	gene	8858350	8859335	.	-	.	gene_id "ENSG00000153048"; gene_name "CARHSP1"; gene_source "ncSplice"; gene_biotype "protein_coding";
16	ncSplice	transcript	8858350	8859335	.	-	.	gene_id "ENSG00000153048"; transcript_id "hsCircRNA-232"; gene_name "CARHSP1"; gene_biotype "protein_coding"; transcript_biotype "circRNA"; oId "lv:circCARHSP1-1267-001"; tissue "lv";
16	ncSplice	exon	8858350	8858472	.	-	.	gene_id "ENSG00000153048"; transcript_id "hsCircRNA-232"; exon_number "1" gene_name "CARHSP1"; gene_biotype "protein_coding"; oId "lv:circCARHSP1-1267-001"; tissue "lv";
16	ncSplice	exon	8859171	8859335	.	-	.	gene_id "ENSG00000153048"; transcript_id "hsCircRNA-232"; exon_number "2" gene_name "CARHSP1"; gene_biotype "protein_coding"; oId "lv:circCARHSP1-1267-001"; tissue "lv";
16	ncSplice	gene	89305206	89317075	.	-	.	gene_id "ENSG00000167522"; gene_name "ANKRD11"; gene_source "ncSplice"; gene_biotype "protein_coding";
16	ncSplice	transcript	89305206	89317075	.	-	.	gene_id "ENSG00000167522"; transcript_id "hsCircRNA-233"; gene_name "ANKRD11"; gene_biotype "protein_coding"; transcript_biotype "circRNA"; oId "lv:circANKRD11-1274-002"; tissue "lv";
16	ncSplice	exon	89305206	89305344	.	-	.	gene_id "ENSG00000167522"; transcript_id "hsCircRNA-233"; exon_number "1" gene_name "ANKRD11"; gene_biotype "protein_coding"; oId "lv:circANKRD11-1274-002"; tissue "lv";
16	ncSplice	exon	89316933	89317075	.	-	.	gene_id "ENSG00000167522"; transcript_id "hsCircRNA-233"; exon_number "2" gene_name "ANKRD11"; gene_biotype "protein_coding"; oId "lv:circANKRD11-1274-002"; tissue "lv";
17	ncSplice	gene	12054889	12081530	.	+	.	gene_id "ENSG00000065559"; gene_name "MAP2K4"; gene_source "ncSplice"; gene_biotype "protein_coding";
17	ncSplice	transcript	12054889	12081530	.	+	.	gene_id "ENSG00000065559"; transcript_id "hsCircRNA-234"; gene_name "MAP2K4"; gene_biotype "protein_coding"; transcript_biotype "circRNA"; oId "lv:circMAP2K4-1282-001"; tissue "lv";
17	ncSplice	exon	12054889	12069849	.	+	.	gene_id "ENSG00000065559"; transcript_id "hsCircRNA-234"; exon_number "1" gene_name "MAP2K4"; gene_biotype "protein_coding"; oId "lv:circMAP2K4-1282-001"; tissue "lv";
17	ncSplice	exon	12081356	12081530	.	+	.	gene_id "ENSG00000065559"; transcript_id "hsCircRNA-234"; exon_number "2" gene_name "MAP2K4"; gene_biotype "protein_coding"; oId "lv:circMAP2K4-1282-001"; tissue "lv";
17	ncSplice	gene	12054889	12095694	.	+	.	gene_id "ENSG00000065559"; gene_name "MAP2K4"; gene_source "ncSplice"; gene_biotype "protein_coding";
17	ncSplice	transcript	12054889	12095694	.	+	.	gene_id "ENSG00000065559"; transcript_id "hsCircRNA-235"; gene_name "MAP2K4"; gene_biotype "protein_coding"; transcript_biotype "circRNA"; oId "lv:circMAP2K4-1283-001"; tissue "lv";
17	ncSplice	exon	12054889	12069849	.	+	.	gene_id "ENSG00000065559"; transcript_id "hsCircRNA-235"; exon_number "1" gene_name "MAP2K4"; gene_biotype "protein_coding"; oId "lv:circMAP2K4-1283-001"; tissue "lv";
17	ncSplice	exon	12081356	12081530	.	+	.	gene_id "ENSG00000065559"; transcript_id "hsCircRNA-235"; exon_number "2" gene_name "MAP2K4"; gene_biotype "protein_coding"; oId "lv:circMAP2K4-1283-001"; tissue "lv";
17	ncSplice	exon	12095575	12095694	.	+	.	gene_id "ENSG00000065559"; transcript_id "hsCircRNA-235"; exon_number "3" gene_name "MAP2K4"; gene_biotype "protein_coding"; oId "lv:circMAP2K4-1283-001"; tissue "lv";
17	ncSplice	gene	12054889	12113360	.	+	.	gene_id "ENSG00000065559"; gene_name "MAP2K4"; gene_source "ncSplice"; gene_biotype "protein_coding";
17	ncSplice	transcript	12054889	12113360	.	+	.	gene_id "ENSG00000065559"; transcript_id "hsCircRNA-236"; gene_name "MAP2K4"; gene_biotype "protein_coding"; transcript_biotype "circRNA"; oId "lv:circMAP2K4-1284-001"; tissue "lv";
17	ncSplice	exon	12054889	12069849	.	+	.	gene_id "ENSG00000065559"; transcript_id "hsCircRNA-236"; exon_number "1" gene_name "MAP2K4"; gene_biotype "protein_coding"; oId "lv:circMAP2K4-1284-001"; tissue "lv";
17	ncSplice	exon	12081356	12081530	.	+	.	gene_id "ENSG00000065559"; transcript_id "hsCircRNA-236"; exon_number "2" gene_name "MAP2K4"; gene_biotype "protein_coding"; oId "lv:circMAP2K4-1284-001"; tissue "lv";
17	ncSplice	exon	12095575	12095694	.	+	.	gene_id "ENSG00000065559"; transcript_id "hsCircRNA-236"; exon_number "3" gene_name "MAP2K4"; gene_biotype "protein_coding"; oId "lv:circMAP2K4-1284-001"; tissue "lv";
17	ncSplice	exon	12107790	12107909	.	+	.	gene_id "ENSG00000065559"; transcript_id "hsCircRNA-236"; exon_number "4" gene_name "MAP2K4"; gene_biotype "protein_coding"; oId "lv:circMAP2K4-1284-001"; tissue "lv";
17	ncSplice	exon	12110375	12110426	.	+	.	gene_id "ENSG00000065559"; transcript_id "hsCircRNA-236"; exon_number "5" gene_name "MAP2K4"; gene_biotype "protein_coding"; oId "lv:circMAP2K4-1284-001"; tissue "lv";
17	ncSplice	exon	12113233	12113360	.	+	.	gene_id "ENSG00000065559"; transcript_id "hsCircRNA-236"; exon_number "6" gene_name "MAP2K4"; gene_biotype "protein_coding"; oId "lv:circMAP2K4-1284-001"; tissue "lv";
17	ncSplice	gene	12081356	12095694	.	+	.	gene_id "ENSG00000065559"; gene_name "MAP2K4"; gene_source "ncSplice"; gene_biotype "protein_coding";
17	ncSplice	transcript	12081356	12095694	.	+	.	gene_id "ENSG00000065559"; transcript_id "hsCircRNA-237"; gene_name "MAP2K4"; gene_biotype "protein_coding"; transcript_biotype "circRNA"; oId "lv:circMAP2K4-1285-001"; tissue "lv";
17	ncSplice	exon	12081356	12081530	.	+	.	gene_id "ENSG00000065559"; transcript_id "hsCircRNA-237"; exon_number "1" gene_name "MAP2K4"; gene_biotype "protein_coding"; oId "lv:circMAP2K4-1285-001"; tissue "lv";
17	ncSplice	exon	12095575	12095694	.	+	.	gene_id "ENSG00000065559"; transcript_id "hsCircRNA-237"; exon_number "2" gene_name "MAP2K4"; gene_biotype "protein_coding"; oId "lv:circMAP2K4-1285-001"; tissue "lv";
17	ncSplice	gene	28163543	28172618	.	+	.	gene_id "ENSG00000087095"; gene_name "NLK"; gene_source "ncSplice"; gene_biotype "protein_coding";
17	ncSplice	transcript	28163543	28172618	.	+	.	gene_id "ENSG00000087095"; transcript_id "hsCircRNA-238"; gene_name "NLK"; gene_biotype "protein_coding"; transcript_biotype "circRNA"; oId "lv:circNLK-1307-001|ce:circNLK-5833-001|ts:circNLK-5683-003"; tissue "lv|ce|ts";
17	ncSplice	exon	28163543	28163628	.	+	.	gene_id "ENSG00000087095"; transcript_id "hsCircRNA-238"; exon_number "1" gene_name "NLK"; gene_biotype "protein_coding"; oId "lv:circNLK-1307-001|ce:circNLK-5833-001|ts:circNLK-5683-003"; tissue "lv|ce|ts";
17	ncSplice	exon	28168448	28168657	.	+	.	gene_id "ENSG00000087095"; transcript_id "hsCircRNA-238"; exon_number "2" gene_name "NLK"; gene_biotype "protein_coding"; oId "lv:circNLK-1307-001|ce:circNLK-5833-001|ts:circNLK-5683-003"; tissue "lv|ce|ts";
17	ncSplice	exon	28172517	28172618	.	+	.	gene_id "ENSG00000087095"; transcript_id "hsCircRNA-238"; exon_number "3" gene_name "NLK"; gene_biotype "protein_coding"; oId "lv:circNLK-1307-001|ce:circNLK-5833-001|ts:circNLK-5683-003"; tissue "lv|ce|ts";
17	ncSplice	gene	281768	327579	.	-	.	gene_id "ENSG00000181031"; gene_name "RPH3AL"; gene_source "ncSplice"; gene_biotype "protein_coding";
17	ncSplice	transcript	281768	327579	.	-	.	gene_id "ENSG00000181031"; transcript_id "hsCircRNA-239"; gene_name "RPH3AL"; gene_biotype "protein_coding"; transcript_biotype "circRNA"; oId "lv:circRPH3AL-1308-001"; tissue "lv";
17	ncSplice	exon	281768	281854	.	-	.	gene_id "ENSG00000181031"; transcript_id "hsCircRNA-239"; exon_number "1" gene_name "RPH3AL"; gene_biotype "protein_coding"; oId "lv:circRPH3AL-1308-001"; tissue "lv";
17	ncSplice	exon	319420	319549	.	-	.	gene_id "ENSG00000181031"; transcript_id "hsCircRNA-239"; exon_number "2" gene_name "RPH3AL"; gene_biotype "protein_coding"; oId "lv:circRPH3AL-1308-001"; tissue "lv";
17	ncSplice	exon	321272	321415	.	-	.	gene_id "ENSG00000181031"; transcript_id "hsCircRNA-239"; exon_number "3" gene_name "RPH3AL"; gene_biotype "protein_coding"; oId "lv:circRPH3AL-1308-001"; tissue "lv";
17	ncSplice	exon	327467	327579	.	-	.	gene_id "ENSG00000181031"; transcript_id "hsCircRNA-239"; exon_number "4" gene_name "RPH3AL"; gene_biotype "protein_coding"; oId "lv:circRPH3AL-1308-001"; tissue "lv";
17	ncSplice	gene	29052920	29053595	.	+	.	gene_id "ENSG00000179761"; gene_name "PIPOX"; gene_source "ncSplice"; gene_biotype "protein_coding";
17	ncSplice	transcript	29052920	29053595	.	+	.	gene_id "ENSG00000179761"; transcript_id "hsCircRNA-240"; gene_name "PIPOX"; gene_biotype "protein_coding"; transcript_biotype "circRNA"; oId "lv:circPIPOX-1312-001"; tissue "lv";
17	ncSplice	exon	29052920	29053133	.	+	.	gene_id "ENSG00000179761"; transcript_id "hsCircRNA-240"; exon_number "1" gene_name "PIPOX"; gene_biotype "protein_coding"; oId "lv:circPIPOX-1312-001"; tissue "lv";
17	ncSplice	exon	29053413	29053595	.	+	.	gene_id "ENSG00000179761"; transcript_id "hsCircRNA-240"; exon_number "2" gene_name "PIPOX"; gene_biotype "protein_coding"; oId "lv:circPIPOX-1312-001"; tissue "lv";
17	ncSplice	gene	37283267	37289528	.	-	.	gene_id "ENSG00000278540"; gene_name "ACACA"; gene_source "ncSplice"; gene_biotype "protein_coding";
17	ncSplice	transcript	37283267	37289528	.	-	.	gene_id "ENSG00000278540"; transcript_id "hsCircRNA-241"; gene_name "ACACA"; gene_biotype "protein_coding"; transcript_biotype "circRNA"; oId "lv:circACACA-1335-001|ce:circACACA-5959-001"; tissue "lv|ce";
17	ncSplice	exon	37283267	37283405	.	-	.	gene_id "ENSG00000278540"; transcript_id "hsCircRNA-241"; exon_number "1" gene_name "ACACA"; gene_biotype "protein_coding"; oId "lv:circACACA-1335-001|ce:circACACA-5959-001"; tissue "lv|ce";
17	ncSplice	exon	37284838	37284970	.	-	.	gene_id "ENSG00000278540"; transcript_id "hsCircRNA-241"; exon_number "2" gene_name "ACACA"; gene_biotype "protein_coding"; oId "lv:circACACA-1335-001|ce:circACACA-5959-001"; tissue "lv|ce";
17	ncSplice	exon	37289418	37289528	.	-	.	gene_id "ENSG00000278540"; transcript_id "hsCircRNA-241"; exon_number "3" gene_name "ACACA"; gene_biotype "protein_coding"; oId "lv:circACACA-1335-001|ce:circACACA-5959-001"; tissue "lv|ce";
17	ncSplice	gene	39908958	39909924	.	-	.	gene_id "ENSG00000073605"; gene_name "GSDMB"; gene_source "ncSplice"; gene_biotype "protein_coding";
17	ncSplice	transcript	39908958	39909924	.	-	.	gene_id "ENSG00000073605"; transcript_id "hsCircRNA-242"; gene_name "GSDMB"; gene_biotype "protein_coding"; transcript_biotype "circRNA"; oId "lv:circGSDMB-1344-001"; tissue "lv";
17	ncSplice	exon	39908958	39909042	.	-	.	gene_id "ENSG00000073605"; transcript_id "hsCircRNA-242"; exon_number "1" gene_name "GSDMB"; gene_biotype "protein_coding"; oId "lv:circGSDMB-1344-001"; tissue "lv";
17	ncSplice	exon	39909756	39909924	.	-	.	gene_id "ENSG00000073605"; transcript_id "hsCircRNA-242"; exon_number "2" gene_name "GSDMB"; gene_biotype "protein_coding"; oId "lv:circGSDMB-1344-001"; tissue "lv";
17	ncSplice	gene	4282798	4296814	.	-	.	gene_id "ENSG00000132388"; gene_name "UBE2G1"; gene_source "ncSplice"; gene_biotype "protein_coding";
17	ncSplice	transcript	4282798	4296814	.	-	.	gene_id "ENSG00000132388"; transcript_id "hsCircRNA-243"; gene_name "UBE2G1"; gene_biotype "protein_coding"; transcript_biotype "circRNA"; oId "lv:circUBE2G1-1353-001|ce:circUBE2G1-6035-001|ts:circUBE2G1-5876-002"; tissue "lv|ce|ts";
17	ncSplice	exon	4282798	4282921	.	-	.	gene_id "ENSG00000132388"; transcript_id "hsCircRNA-243"; exon_number "1" gene_name "UBE2G1"; gene_biotype "protein_coding"; oId "lv:circUBE2G1-1353-001|ce:circUBE2G1-6035-001|ts:circUBE2G1-5876-002"; tissue "lv|ce|ts";
17	ncSplice	exon	4289230	4289408	.	-	.	gene_id "ENSG00000132388"; transcript_id "hsCircRNA-243"; exon_number "2" gene_name "UBE2G1"; gene_biotype "protein_coding"; oId "lv:circUBE2G1-1353-001|ce:circUBE2G1-6035-001|ts:circUBE2G1-5876-002"; tissue "lv|ce|ts";
17	ncSplice	exon	4296717	4296814	.	-	.	gene_id "ENSG00000132388"; transcript_id "hsCircRNA-243"; exon_number "3" gene_name "UBE2G1"; gene_biotype "protein_coding"; oId "lv:circUBE2G1-1353-001|ce:circUBE2G1-6035-001|ts:circUBE2G1-5876-002"; tissue "lv|ce|ts";
17	ncSplice	gene	49311312	49312042	.	-	.	gene_id "ENSG00000198740"; gene_name "ZNF652"; gene_source "ncSplice"; gene_biotype "protein_coding";
17	ncSplice	transcript	49311312	49312042	.	-	.	gene_id "ENSG00000198740"; transcript_id "hsCircRNA-244"; gene_name "ZNF652"; gene_biotype "protein_coding"; transcript_biotype "circRNA"; oId "lv:circZNF652-1368-001|ce:circZNF652-6095-001|ts:circZNF652-5951-001"; tissue "lv|ce|ts";
17	ncSplice	exon	49311312	49311456	.	-	.	gene_id "ENSG00000198740"; transcript_id "hsCircRNA-244"; exon_number "1" gene_name "ZNF652"; gene_biotype "protein_coding"; oId "lv:circZNF652-1368-001|ce:circZNF652-6095-001|ts:circZNF652-5951-001"; tissue "lv|ce|ts";
17	ncSplice	exon	49311927	49312042	.	-	.	gene_id "ENSG00000198740"; transcript_id "hsCircRNA-244"; exon_number "2" gene_name "ZNF652"; gene_biotype "protein_coding"; oId "lv:circZNF652-1368-001|ce:circZNF652-6095-001|ts:circZNF652-5951-001"; tissue "lv|ce|ts";
17	ncSplice	gene	54938924	54947312	.	+	.	gene_id "ENSG00000141198"; gene_name "TOM1L1"; gene_source "ncSplice"; gene_biotype "protein_coding";
17	ncSplice	transcript	54938924	54947312	.	+	.	gene_id "ENSG00000141198"; transcript_id "hsCircRNA-245"; gene_name "TOM1L1"; gene_biotype "protein_coding"; transcript_biotype "circRNA"; oId "lv:circTOM1L1-1378-002"; tissue "lv";
17	ncSplice	exon	54938924	54939020	.	+	.	gene_id "ENSG00000141198"; transcript_id "hsCircRNA-245"; exon_number "1" gene_name "TOM1L1"; gene_biotype "protein_coding"; oId "lv:circTOM1L1-1378-002"; tissue "lv";
17	ncSplice	exon	54947261	54947312	.	+	.	gene_id "ENSG00000141198"; transcript_id "hsCircRNA-245"; exon_number "2" gene_name "TOM1L1"; gene_biotype "protein_coding"; oId "lv:circTOM1L1-1378-002"; tissue "lv";
17	ncSplice	gene	56901419	56904488	.	-	.	gene_id "ENSG00000121060"; gene_name "TRIM25"; gene_source "ncSplice"; gene_biotype "protein_coding";
17	ncSplice	transcript	56901419	56904488	.	-	.	gene_id "ENSG00000121060"; transcript_id "hsCircRNA-246"; gene_name "TRIM25"; gene_biotype "protein_coding"; transcript_biotype "circRNA"; oId "lv:circTRIM25-1384-001"; tissue "lv";
17	ncSplice	exon	56901419	56901578	.	-	.	gene_id "ENSG00000121060"; transcript_id "hsCircRNA-246"; exon_number "1" gene_name "TRIM25"; gene_biotype "protein_coding"; oId "lv:circTRIM25-1384-001"; tissue "lv";
17	ncSplice	exon	56904255	56904488	.	-	.	gene_id "ENSG00000121060"; transcript_id "hsCircRNA-246"; exon_number "2" gene_name "TRIM25"; gene_biotype "protein_coding"; oId "lv:circTRIM25-1384-001"; tissue "lv";
1	ncSplice	gene	75739980	75750546	.	+	.	gene_id "ENSG00000117054"; gene_name "ACADM"; gene_source "ncSplice"; gene_biotype "protein_coding";
1	ncSplice	transcript	75739980	75750546	.	+	.	gene_id "ENSG00000117054"; transcript_id "hsCircRNA-247"; gene_name "ACADM"; gene_biotype "protein_coding"; transcript_biotype "circRNA"; oId "lv:circACADM-1387-001|ce:circACADM-6165-001|ts:circACADM-6034-001"; tissue "lv|ce|ts";
1	ncSplice	exon	75739980	75740110	.	+	.	gene_id "ENSG00000117054"; transcript_id "hsCircRNA-247"; exon_number "1" gene_name "ACADM"; gene_biotype "protein_coding"; oId "lv:circACADM-1387-001|ce:circACADM-6165-001|ts:circACADM-6034-001"; tissue "lv|ce|ts";
1	ncSplice	exon	75745806	75745914	.	+	.	gene_id "ENSG00000117054"; transcript_id "hsCircRNA-247"; exon_number "2" gene_name "ACADM"; gene_biotype "protein_coding"; oId "lv:circACADM-1387-001|ce:circACADM-6165-001|ts:circACADM-6034-001"; tissue "lv|ce|ts";
1	ncSplice	exon	75749419	75749559	.	+	.	gene_id "ENSG00000117054"; transcript_id "hsCircRNA-247"; exon_number "3" gene_name "ACADM"; gene_biotype "protein_coding"; oId "lv:circACADM-1387-001|ce:circACADM-6165-001|ts:circACADM-6034-001"; tissue "lv|ce|ts";
1	ncSplice	exon	75750451	75750546	.	+	.	gene_id "ENSG00000117054"; transcript_id "hsCircRNA-247"; exon_number "4" gene_name "ACADM"; gene_biotype "protein_coding"; oId "lv:circACADM-1387-001|ce:circACADM-6165-001|ts:circACADM-6034-001"; tissue "lv|ce|ts";
17	ncSplice	gene	59731421	59738947	.	+	.	gene_id "ENSG00000062716"; gene_name "VMP1"; gene_source "ncSplice"; gene_biotype "protein_coding";
17	ncSplice	transcript	59731421	59738947	.	+	.	gene_id "ENSG00000062716"; transcript_id "hsCircRNA-248"; gene_name "VMP1"; gene_biotype "protein_coding"; transcript_biotype "circRNA"; oId "lv:circVMP1-1389-001|ce:circVMP1-6217-001|ts:circVMP1-6073-001"; tissue "lv|ce|ts";
17	ncSplice	exon	59731421	59731522	.	+	.	gene_id "ENSG00000062716"; transcript_id "hsCircRNA-248"; exon_number "1" gene_name "VMP1"; gene_biotype "protein_coding"; oId "lv:circVMP1-1389-001|ce:circVMP1-6217-001|ts:circVMP1-6073-001"; tissue "lv|ce|ts";
17	ncSplice	exon	59735338	59735473	.	+	.	gene_id "ENSG00000062716"; transcript_id "hsCircRNA-248"; exon_number "2" gene_name "VMP1"; gene_biotype "protein_coding"; oId "lv:circVMP1-1389-001|ce:circVMP1-6217-001|ts:circVMP1-6073-001"; tissue "lv|ce|ts";
17	ncSplice	exon	59737453	59737543	.	+	.	gene_id "ENSG00000062716"; transcript_id "hsCircRNA-248"; exon_number "3" gene_name "VMP1"; gene_biotype "protein_coding"; oId "lv:circVMP1-1389-001|ce:circVMP1-6217-001|ts:circVMP1-6073-001"; tissue "lv|ce|ts";
17	ncSplice	exon	59738837	59738947	.	+	.	gene_id "ENSG00000062716"; transcript_id "hsCircRNA-248"; exon_number "4" gene_name "VMP1"; gene_biotype "protein_coding"; oId "lv:circVMP1-1389-001|ce:circVMP1-6217-001|ts:circVMP1-6073-001"; tissue "lv|ce|ts";
17	ncSplice	gene	59764971	59773885	.	+	.	gene_id "ENSG00000062716"; gene_name "VMP1"; gene_source "ncSplice"; gene_biotype "protein_coding";
17	ncSplice	transcript	59764971	59773885	.	+	.	gene_id "ENSG00000062716"; transcript_id "hsCircRNA-249"; gene_name "VMP1"; gene_biotype "protein_coding"; transcript_biotype "circRNA"; oId "lv:circVMP1-1391-001|ce:circVMP1-6227-001|ts:circVMP1-6076-001"; tissue "lv|ce|ts";
17	ncSplice	exon	59764971	59765138	.	+	.	gene_id "ENSG00000062716"; transcript_id "hsCircRNA-249"; exon_number "1" gene_name "VMP1"; gene_biotype "protein_coding"; oId "lv:circVMP1-1391-001|ce:circVMP1-6227-001|ts:circVMP1-6076-001"; tissue "lv|ce|ts";
17	ncSplice	exon	59773754	59773885	.	+	.	gene_id "ENSG00000062716"; transcript_id "hsCircRNA-249"; exon_number "2" gene_name "VMP1"; gene_biotype "protein_coding"; oId "lv:circVMP1-1391-001|ce:circVMP1-6227-001|ts:circVMP1-6076-001"; tissue "lv|ce|ts";
17	ncSplice	gene	62010550	62063301	.	-	.	gene_id "ENSG00000108510"; gene_name "MED13"; gene_source "ncSplice"; gene_biotype "protein_coding";
17	ncSplice	transcript	62010550	62063301	.	-	.	gene_id "ENSG00000108510"; transcript_id "hsCircRNA-250"; gene_name "MED13"; gene_biotype "protein_coding"; transcript_biotype "circRNA"; oId "lv:circMED13-1405-001|ce:circMED13-6277-003"; tissue "lv|ce";
17	ncSplice	exon	62010550	62011233	.	-	.	gene_id "ENSG00000108510"; transcript_id "hsCircRNA-250"; exon_number "1" gene_name "MED13"; gene_biotype "protein_coding"; oId "lv:circMED13-1405-001|ce:circMED13-6277-003"; tissue "lv|ce";
17	ncSplice	exon	62029541	62029651	.	-	.	gene_id "ENSG00000108510"; transcript_id "hsCircRNA-250"; exon_number "2" gene_name "MED13"; gene_biotype "protein_coding"; oId "lv:circMED13-1405-001|ce:circMED13-6277-003"; tissue "lv|ce";
17	ncSplice	exon	62029851	62030013	.	-	.	gene_id "ENSG00000108510"; transcript_id "hsCircRNA-250"; exon_number "3" gene_name "MED13"; gene_biotype "protein_coding"; oId "lv:circMED13-1405-001|ce:circMED13-6277-003"; tissue "lv|ce";
17	ncSplice	exon	62031444	62031638	.	-	.	gene_id "ENSG00000108510"; transcript_id "hsCircRNA-250"; exon_number "4" gene_name "MED13"; gene_biotype "protein_coding"; oId "lv:circMED13-1405-001|ce:circMED13-6277-003"; tissue "lv|ce";
17	ncSplice	exon	62033787	62033984	.	-	.	gene_id "ENSG00000108510"; transcript_id "hsCircRNA-250"; exon_number "5" gene_name "MED13"; gene_biotype "protein_coding"; oId "lv:circMED13-1405-001|ce:circMED13-6277-003"; tissue "lv|ce";
17	ncSplice	exon	62035463	62063301	.	-	.	gene_id "ENSG00000108510"; transcript_id "hsCircRNA-250"; exon_number "6" gene_name "MED13"; gene_biotype "protein_coding"; oId "lv:circMED13-1405-001|ce:circMED13-6277-003"; tissue "lv|ce";
17	ncSplice	gene	62033787	62035608	.	-	.	gene_id "ENSG00000108510"; gene_name "MED13"; gene_source "ncSplice"; gene_biotype "protein_coding";
17	ncSplice	transcript	62033787	62035608	.	-	.	gene_id "ENSG00000108510"; transcript_id "hsCircRNA-251"; gene_name "MED13"; gene_biotype "protein_coding"; transcript_biotype "circRNA"; oId "lv:circMED13-1406-001|ce:circMED13-6279-001"; tissue "lv|ce";
17	ncSplice	exon	62033787	62033984	.	-	.	gene_id "ENSG00000108510"; transcript_id "hsCircRNA-251"; exon_number "1" gene_name "MED13"; gene_biotype "protein_coding"; oId "lv:circMED13-1406-001|ce:circMED13-6279-001"; tissue "lv|ce";
17	ncSplice	exon	62035463	62035608	.	-	.	gene_id "ENSG00000108510"; transcript_id "hsCircRNA-251"; exon_number "2" gene_name "MED13"; gene_biotype "protein_coding"; oId "lv:circMED13-1406-001|ce:circMED13-6279-001"; tissue "lv|ce";
17	ncSplice	gene	67928355	67932019	.	+	.	gene_id "ENSG00000171634"; gene_name "BPTF"; gene_source "ncSplice"; gene_biotype "protein_coding";
17	ncSplice	transcript	67928355	67932019	.	+	.	gene_id "ENSG00000171634"; transcript_id "hsCircRNA-252"; gene_name "BPTF"; gene_biotype "protein_coding"; transcript_biotype "circRNA"; oId "lv:circBPTF-1415-001|ce:circBPTF-6352-001"; tissue "lv|ce";
17	ncSplice	exon	67928355	67928601	.	+	.	gene_id "ENSG00000171634"; transcript_id "hsCircRNA-252"; exon_number "1" gene_name "BPTF"; gene_biotype "protein_coding"; oId "lv:circBPTF-1415-001|ce:circBPTF-6352-001"; tissue "lv|ce";
17	ncSplice	exon	67928959	67929120	.	+	.	gene_id "ENSG00000171634"; transcript_id "hsCircRNA-252"; exon_number "2" gene_name "BPTF"; gene_biotype "protein_coding"; oId "lv:circBPTF-1415-001|ce:circBPTF-6352-001"; tissue "lv|ce";
17	ncSplice	exon	67929336	67929487	.	+	.	gene_id "ENSG00000171634"; transcript_id "hsCircRNA-252"; exon_number "3" gene_name "BPTF"; gene_biotype "protein_coding"; oId "lv:circBPTF-1415-001|ce:circBPTF-6352-001"; tissue "lv|ce";
17	ncSplice	exon	67931911	67932019	.	+	.	gene_id "ENSG00000171634"; transcript_id "hsCircRNA-252"; exon_number "4" gene_name "BPTF"; gene_biotype "protein_coding"; oId "lv:circBPTF-1415-001|ce:circBPTF-6352-001"; tissue "lv|ce";
1	ncSplice	gene	7777160	7778169	.	+	.	gene_id "ENSG00000049245"; gene_name "VAMP3"; gene_source "ncSplice"; gene_biotype "protein_coding";
1	ncSplice	transcript	7777160	7778169	.	+	.	gene_id "ENSG00000049245"; transcript_id "hsCircRNA-253"; gene_name "VAMP3"; gene_biotype "protein_coding"; transcript_biotype "circRNA"; oId "lv:circVAMP3-1421-001|ce:circVAMP3-6403-001|ts:circVAMP3-6247-001"; tissue "lv|ce|ts";
1	ncSplice	exon	7777160	7777318	.	+	.	gene_id "ENSG00000049245"; transcript_id "hsCircRNA-253"; exon_number "1" gene_name "VAMP3"; gene_biotype "protein_coding"; oId "lv:circVAMP3-1421-001|ce:circVAMP3-6403-001|ts:circVAMP3-6247-001"; tissue "lv|ce|ts";
1	ncSplice	exon	7778118	7778169	.	+	.	gene_id "ENSG00000049245"; transcript_id "hsCircRNA-253"; exon_number "2" gene_name "VAMP3"; gene_biotype "protein_coding"; oId "lv:circVAMP3-1421-001|ce:circVAMP3-6403-001|ts:circVAMP3-6247-001"; tissue "lv|ce|ts";
17	ncSplice	gene	82563354	82568201	.	+	.	gene_id "ENSG00000141568"; gene_name "FOXK2"; gene_source "ncSplice"; gene_biotype "protein_coding";
17	ncSplice	transcript	82563354	82568201	.	+	.	gene_id "ENSG00000141568"; transcript_id "hsCircRNA-254"; gene_name "FOXK2"; gene_biotype "protein_coding"; transcript_biotype "circRNA"; oId "lv:circFOXK2-1433-001|ce:circFOXK2-6448-001|ts:circFOXK2-6295-001"; tissue "lv|ce|ts";
17	ncSplice	exon	82563354	82563548	.	+	.	gene_id "ENSG00000141568"; transcript_id "hsCircRNA-254"; exon_number "1" gene_name "FOXK2"; gene_biotype "protein_coding"; oId "lv:circFOXK2-1433-001|ce:circFOXK2-6448-001|ts:circFOXK2-6295-001"; tissue "lv|ce|ts";
17	ncSplice	exon	82568054	82568201	.	+	.	gene_id "ENSG00000141568"; transcript_id "hsCircRNA-254"; exon_number "2" gene_name "FOXK2"; gene_biotype "protein_coding"; oId "lv:circFOXK2-1433-001|ce:circFOXK2-6448-001|ts:circFOXK2-6295-001"; tissue "lv|ce|ts";
1	ncSplice	gene	805799	810170	.	-	.	gene_id "ENSG00000230092"; gene_name "RP11-206L10.8"; gene_source "ncSplice"; gene_biotype "transcribed_unprocessed_pseudogene";
1	ncSplice	transcript	805799	810170	.	-	.	gene_id "ENSG00000230092"; transcript_id "hsCircRNA-255"; gene_name "RP11-206L10.8"; gene_biotype "transcribed_unprocessed_pseudogene"; transcript_biotype "circRNA"; oId "lv:circRP11-206L10.8-1444-001|ce:circRP11-206L10.8-6470-003|ts:circRP11-206L10.8-6321-006"; tissue "lv|ce|ts";
1	ncSplice	exon	805799	805891	.	-	.	gene_id "ENSG00000230092"; transcript_id "hsCircRNA-255"; exon_number "1" gene_name "RP11-206L10.8"; gene_biotype "transcribed_unprocessed_pseudogene"; oId "lv:circRP11-206L10.8-1444-001|ce:circRP11-206L10.8-6470-003|ts:circRP11-206L10.8-6321-006"; tissue "lv|ce|ts";
1	ncSplice	exon	808574	808623	.	-	.	gene_id "ENSG00000230092"; transcript_id "hsCircRNA-255"; exon_number "2" gene_name "RP11-206L10.8"; gene_biotype "transcribed_unprocessed_pseudogene"; oId "lv:circRP11-206L10.8-1444-001|ce:circRP11-206L10.8-6470-003|ts:circRP11-206L10.8-6321-006"; tissue "lv|ce|ts";
1	ncSplice	exon	810067	810170	.	-	.	gene_id "ENSG00000230092"; transcript_id "hsCircRNA-255"; exon_number "3" gene_name "RP11-206L10.8"; gene_biotype "transcribed_unprocessed_pseudogene"; oId "lv:circRP11-206L10.8-1444-001|ce:circRP11-206L10.8-6470-003|ts:circRP11-206L10.8-6321-006"; tissue "lv|ce|ts";
18	ncSplice	gene	12999421	13019206	.	+	.	gene_id "ENSG00000101639"; gene_name "CEP192"; gene_source "ncSplice"; gene_biotype "protein_coding";
18	ncSplice	transcript	12999421	13019206	.	+	.	gene_id "ENSG00000101639"; transcript_id "hsCircRNA-256"; gene_name "CEP192"; gene_biotype "protein_coding"; transcript_biotype "circRNA"; oId "lv:circCEP192-1449-001|ts:circCEP192-6340-057"; tissue "lv|ts";
18	ncSplice	exon	12999421	12999588	.	+	.	gene_id "ENSG00000101639"; transcript_id "hsCircRNA-256"; exon_number "1" gene_name "CEP192"; gene_biotype "protein_coding"; oId "lv:circCEP192-1449-001|ts:circCEP192-6340-057"; tissue "lv|ts";
18	ncSplice	exon	13001457	13001582	.	+	.	gene_id "ENSG00000101639"; transcript_id "hsCircRNA-256"; exon_number "2" gene_name "CEP192"; gene_biotype "protein_coding"; oId "lv:circCEP192-1449-001|ts:circCEP192-6340-057"; tissue "lv|ts";
18	ncSplice	exon	13008456	13008631	.	+	.	gene_id "ENSG00000101639"; transcript_id "hsCircRNA-256"; exon_number "3" gene_name "CEP192"; gene_biotype "protein_coding"; oId "lv:circCEP192-1449-001|ts:circCEP192-6340-057"; tissue "lv|ts";
18	ncSplice	exon	13012973	13013025	.	+	.	gene_id "ENSG00000101639"; transcript_id "hsCircRNA-256"; exon_number "4" gene_name "CEP192"; gene_biotype "protein_coding"; oId "lv:circCEP192-1449-001|ts:circCEP192-6340-057"; tissue "lv|ts";
18	ncSplice	exon	13015328	13015448	.	+	.	gene_id "ENSG00000101639"; transcript_id "hsCircRNA-256"; exon_number "5" gene_name "CEP192"; gene_biotype "protein_coding"; oId "lv:circCEP192-1449-001|ts:circCEP192-6340-057"; tissue "lv|ts";
18	ncSplice	exon	13017188	13017336	.	+	.	gene_id "ENSG00000101639"; transcript_id "hsCircRNA-256"; exon_number "6" gene_name "CEP192"; gene_biotype "protein_coding"; oId "lv:circCEP192-1449-001|ts:circCEP192-6340-057"; tissue "lv|ts";
18	ncSplice	exon	13018480	13018615	.	+	.	gene_id "ENSG00000101639"; transcript_id "hsCircRNA-256"; exon_number "7" gene_name "CEP192"; gene_biotype "protein_coding"; oId "lv:circCEP192-1449-001|ts:circCEP192-6340-057"; tissue "lv|ts";
18	ncSplice	exon	13019082	13019206	.	+	.	gene_id "ENSG00000101639"; transcript_id "hsCircRNA-256"; exon_number "8" gene_name "CEP192"; gene_biotype "protein_coding"; oId "lv:circCEP192-1449-001|ts:circCEP192-6340-057"; tissue "lv|ts";
18	ncSplice	gene	21765772	21779685	.	+	.	gene_id "ENSG00000101752"; gene_name "MIB1"; gene_source "ncSplice"; gene_biotype "protein_coding";
18	ncSplice	transcript	21765772	21779685	.	+	.	gene_id "ENSG00000101752"; transcript_id "hsCircRNA-257"; gene_name "MIB1"; gene_biotype "protein_coding"; transcript_biotype "circRNA"; oId "lv:circMIB1-1457-001|ce:circMIB1-6516-026"; tissue "lv|ce";
18	ncSplice	exon	21765772	21765943	.	+	.	gene_id "ENSG00000101752"; transcript_id "hsCircRNA-257"; exon_number "1" gene_name "MIB1"; gene_biotype "protein_coding"; oId "lv:circMIB1-1457-001|ce:circMIB1-6516-026"; tissue "lv|ce";
18	ncSplice	exon	21768623	21768752	.	+	.	gene_id "ENSG00000101752"; transcript_id "hsCircRNA-257"; exon_number "2" gene_name "MIB1"; gene_biotype "protein_coding"; oId "lv:circMIB1-1457-001|ce:circMIB1-6516-026"; tissue "lv|ce";
18	ncSplice	exon	21773624	21773728	.	+	.	gene_id "ENSG00000101752"; transcript_id "hsCircRNA-257"; exon_number "3" gene_name "MIB1"; gene_biotype "protein_coding"; oId "lv:circMIB1-1457-001|ce:circMIB1-6516-026"; tissue "lv|ce";
18	ncSplice	exon	21778103	21778169	.	+	.	gene_id "ENSG00000101752"; transcript_id "hsCircRNA-257"; exon_number "4" gene_name "MIB1"; gene_biotype "protein_coding"; oId "lv:circMIB1-1457-001|ce:circMIB1-6516-026"; tissue "lv|ce";
18	ncSplice	exon	21779481	21779685	.	+	.	gene_id "ENSG00000101752"; transcript_id "hsCircRNA-257"; exon_number "5" gene_name "MIB1"; gene_biotype "protein_coding"; oId "lv:circMIB1-1457-001|ce:circMIB1-6516-026"; tissue "lv|ce";
18	ncSplice	gene	24064140	24069271	.	+	.	gene_id "ENSG00000168234"; gene_name "TTC39C"; gene_source "ncSplice"; gene_biotype "protein_coding";
18	ncSplice	transcript	24064140	24069271	.	+	.	gene_id "ENSG00000168234"; transcript_id "hsCircRNA-258"; gene_name "TTC39C"; gene_biotype "protein_coding"; transcript_biotype "circRNA"; oId "lv:circTTC39C-1461-001"; tissue "lv";
18	ncSplice	exon	24064140	24064188	.	+	.	gene_id "ENSG00000168234"; transcript_id "hsCircRNA-258"; exon_number "1" gene_name "TTC39C"; gene_biotype "protein_coding"; oId "lv:circTTC39C-1461-001"; tissue "lv";
18	ncSplice	exon	24066012	24066140	.	+	.	gene_id "ENSG00000168234"; transcript_id "hsCircRNA-258"; exon_number "2" gene_name "TTC39C"; gene_biotype "protein_coding"; oId "lv:circTTC39C-1461-001"; tissue "lv";
18	ncSplice	exon	24069157	24069271	.	+	.	gene_id "ENSG00000168234"; transcript_id "hsCircRNA-258"; exon_number "3" gene_name "TTC39C"; gene_biotype "protein_coding"; oId "lv:circTTC39C-1461-001"; tissue "lv";
18	ncSplice	gene	24064140	24083081	.	+	.	gene_id "ENSG00000168234"; gene_name "TTC39C"; gene_source "ncSplice"; gene_biotype "protein_coding";
18	ncSplice	transcript	24064140	24083081	.	+	.	gene_id "ENSG00000168234"; transcript_id "hsCircRNA-259"; gene_name "TTC39C"; gene_biotype "protein_coding"; transcript_biotype "circRNA"; oId "lv:circTTC39C-1462-001|ce:circTTC39C-6542-003|ts:circTTC39C-6396-003"; tissue "lv|ce|ts";
18	ncSplice	exon	24064140	24064188	.	+	.	gene_id "ENSG00000168234"; transcript_id "hsCircRNA-259"; exon_number "1" gene_name "TTC39C"; gene_biotype "protein_coding"; oId "lv:circTTC39C-1462-001|ce:circTTC39C-6542-003|ts:circTTC39C-6396-003"; tissue "lv|ce|ts";
18	ncSplice	exon	24066012	24066140	.	+	.	gene_id "ENSG00000168234"; transcript_id "hsCircRNA-259"; exon_number "2" gene_name "TTC39C"; gene_biotype "protein_coding"; oId "lv:circTTC39C-1462-001|ce:circTTC39C-6542-003|ts:circTTC39C-6396-003"; tissue "lv|ce|ts";
18	ncSplice	exon	24069157	24069271	.	+	.	gene_id "ENSG00000168234"; transcript_id "hsCircRNA-259"; exon_number "3" gene_name "TTC39C"; gene_biotype "protein_coding"; oId "lv:circTTC39C-1462-001|ce:circTTC39C-6542-003|ts:circTTC39C-6396-003"; tissue "lv|ce|ts";
18	ncSplice	exon	24080585	24080939	.	+	.	gene_id "ENSG00000168234"; transcript_id "hsCircRNA-259"; exon_number "4" gene_name "TTC39C"; gene_biotype "protein_coding"; oId "lv:circTTC39C-1462-001|ce:circTTC39C-6542-003|ts:circTTC39C-6396-003"; tissue "lv|ce|ts";
18	ncSplice	exon	24082913	24083081	.	+	.	gene_id "ENSG00000168234"; transcript_id "hsCircRNA-259"; exon_number "5" gene_name "TTC39C"; gene_biotype "protein_coding"; oId "lv:circTTC39C-1462-001|ce:circTTC39C-6542-003|ts:circTTC39C-6396-003"; tissue "lv|ce|ts";
18	ncSplice	gene	32111754	32113860	.	+	.	gene_id "ENSG00000134758"; gene_name "RNF138"; gene_source "ncSplice"; gene_biotype "protein_coding";
18	ncSplice	transcript	32111754	32113860	.	+	.	gene_id "ENSG00000134758"; transcript_id "hsCircRNA-260"; gene_name "RNF138"; gene_biotype "protein_coding"; transcript_biotype "circRNA"; oId "lv:circRNF138-1467-001|ce:circRNF138-6582-001"; tissue "lv|ce";
18	ncSplice	exon	32111754	32111919	.	+	.	gene_id "ENSG00000134758"; transcript_id "hsCircRNA-260"; exon_number "1" gene_name "RNF138"; gene_biotype "protein_coding"; oId "lv:circRNF138-1467-001|ce:circRNF138-6582-001"; tissue "lv|ce";
18	ncSplice	exon	32113745	32113860	.	+	.	gene_id "ENSG00000134758"; transcript_id "hsCircRNA-260"; exon_number "2" gene_name "RNF138"; gene_biotype "protein_coding"; oId "lv:circRNF138-1467-001|ce:circRNF138-6582-001"; tissue "lv|ce";
18	ncSplice	gene	32111754	32124845	.	+	.	gene_id "ENSG00000134758"; gene_name "RNF138"; gene_source "ncSplice"; gene_biotype "protein_coding";
18	ncSplice	transcript	32111754	32124845	.	+	.	gene_id "ENSG00000134758"; transcript_id "hsCircRNA-261"; gene_name "RNF138"; gene_biotype "protein_coding"; transcript_biotype "circRNA"; oId "lv:circRNF138-1468-001|ce:circRNF138-6583-002"; tissue "lv|ce";
18	ncSplice	exon	32111754	32111919	.	+	.	gene_id "ENSG00000134758"; transcript_id "hsCircRNA-261"; exon_number "1" gene_name "RNF138"; gene_biotype "protein_coding"; oId "lv:circRNF138-1468-001|ce:circRNF138-6583-002"; tissue "lv|ce";
18	ncSplice	exon	32113745	32113860	.	+	.	gene_id "ENSG00000134758"; transcript_id "hsCircRNA-261"; exon_number "2" gene_name "RNF138"; gene_biotype "protein_coding"; oId "lv:circRNF138-1468-001|ce:circRNF138-6583-002"; tissue "lv|ce";
18	ncSplice	exon	32123518	32123574	.	+	.	gene_id "ENSG00000134758"; transcript_id "hsCircRNA-261"; exon_number "3" gene_name "RNF138"; gene_biotype "protein_coding"; oId "lv:circRNF138-1468-001|ce:circRNF138-6583-002"; tissue "lv|ce";
18	ncSplice	exon	32124734	32124845	.	+	.	gene_id "ENSG00000134758"; transcript_id "hsCircRNA-261"; exon_number "4" gene_name "RNF138"; gene_biotype "protein_coding"; oId "lv:circRNF138-1468-001|ce:circRNF138-6583-002"; tissue "lv|ce";
18	ncSplice	gene	36026900	36033837	.	-	.	gene_id "ENSG00000141425"; gene_name "RPRD1A"; gene_source "ncSplice"; gene_biotype "protein_coding";
18	ncSplice	transcript	36026900	36033837	.	-	.	gene_id "ENSG00000141425"; transcript_id "hsCircRNA-262"; gene_name "RPRD1A"; gene_biotype "protein_coding"; transcript_biotype "circRNA"; oId "lv:circRPRD1A-1472-001|ce:circRPRD1A-6608-001"; tissue "lv|ce";
18	ncSplice	exon	36026900	36027075	.	-	.	gene_id "ENSG00000141425"; transcript_id "hsCircRNA-262"; exon_number "1" gene_name "RPRD1A"; gene_biotype "protein_coding"; oId "lv:circRPRD1A-1472-001|ce:circRPRD1A-6608-001"; tissue "lv|ce";
18	ncSplice	exon	36027184	36030905	.	-	.	gene_id "ENSG00000141425"; transcript_id "hsCircRNA-262"; exon_number "2" gene_name "RPRD1A"; gene_biotype "protein_coding"; oId "lv:circRPRD1A-1472-001|ce:circRPRD1A-6608-001"; tissue "lv|ce";
18	ncSplice	exon	36030991	36031097	.	-	.	gene_id "ENSG00000141425"; transcript_id "hsCircRNA-262"; exon_number "3" gene_name "RPRD1A"; gene_biotype "protein_coding"; oId "lv:circRPRD1A-1472-001|ce:circRPRD1A-6608-001"; tissue "lv|ce";
18	ncSplice	exon	36033708	36033837	.	-	.	gene_id "ENSG00000141425"; transcript_id "hsCircRNA-262"; exon_number "4" gene_name "RPRD1A"; gene_biotype "protein_coding"; oId "lv:circRPRD1A-1472-001|ce:circRPRD1A-6608-001"; tissue "lv|ce";
18	ncSplice	gene	46946057	46946923	.	+	.	gene_id "ENSG00000167216"; gene_name "KATNAL2"; gene_source "ncSplice"; gene_biotype "protein_coding";
18	ncSplice	transcript	46946057	46946923	.	+	.	gene_id "ENSG00000167216"; transcript_id "hsCircRNA-263"; gene_name "KATNAL2"; gene_biotype "protein_coding"; transcript_biotype "circRNA"; oId "lv:circKATNAL2-1482-001"; tissue "lv";
18	ncSplice	exon	46946057	46946275	.	+	.	gene_id "ENSG00000167216"; transcript_id "hsCircRNA-263"; exon_number "1" gene_name "KATNAL2"; gene_biotype "protein_coding"; oId "lv:circKATNAL2-1482-001"; tissue "lv";
18	ncSplice	exon	46946854	46946923	.	+	.	gene_id "ENSG00000167216"; transcript_id "hsCircRNA-263"; exon_number "2" gene_name "KATNAL2"; gene_biotype "protein_coding"; oId "lv:circKATNAL2-1482-001"; tissue "lv";
18	ncSplice	gene	47865059	47896809	.	-	.	gene_id "ENSG00000175387"; gene_name "SMAD2"; gene_source "ncSplice"; gene_biotype "protein_coding";
18	ncSplice	transcript	47865059	47896809	.	-	.	gene_id "ENSG00000175387"; transcript_id "hsCircRNA-264"; gene_name "SMAD2"; gene_biotype "protein_coding"; transcript_biotype "circRNA"; oId "lv:circSMAD2-1483-001|ts:circSMAD2-6521-031"; tissue "lv|ts";
18	ncSplice	exon	47865059	47865133	.	-	.	gene_id "ENSG00000175387"; transcript_id "hsCircRNA-264"; exon_number "1" gene_name "SMAD2"; gene_biotype "protein_coding"; oId "lv:circSMAD2-1483-001|ts:circSMAD2-6521-031"; tissue "lv|ts";
18	ncSplice	exon	47868323	47868457	.	-	.	gene_id "ENSG00000175387"; transcript_id "hsCircRNA-264"; exon_number "2" gene_name "SMAD2"; gene_biotype "protein_coding"; oId "lv:circSMAD2-1483-001|ts:circSMAD2-6521-031"; tissue "lv|ts";
18	ncSplice	exon	47869243	47869436	.	-	.	gene_id "ENSG00000175387"; transcript_id "hsCircRNA-264"; exon_number "3" gene_name "SMAD2"; gene_biotype "protein_coding"; oId "lv:circSMAD2-1483-001|ts:circSMAD2-6521-031"; tissue "lv|ts";
18	ncSplice	exon	47870475	47870564	.	-	.	gene_id "ENSG00000175387"; transcript_id "hsCircRNA-264"; exon_number "4" gene_name "SMAD2"; gene_biotype "protein_coding"; oId "lv:circSMAD2-1483-001|ts:circSMAD2-6521-031"; tissue "lv|ts";
18	ncSplice	exon	47896521	47896809	.	-	.	gene_id "ENSG00000175387"; transcript_id "hsCircRNA-264"; exon_number "5" gene_name "SMAD2"; gene_biotype "protein_coding"; oId "lv:circSMAD2-1483-001|ts:circSMAD2-6521-031"; tissue "lv|ts";
1	ncSplice	gene	85350415	85358847	.	-	.	gene_id "ENSG00000153904"; gene_name "DDAH1"; gene_source "ncSplice"; gene_biotype "protein_coding";
1	ncSplice	transcript	85350415	85358847	.	-	.	gene_id "ENSG00000153904"; transcript_id "hsCircRNA-265"; gene_name "DDAH1"; gene_biotype "protein_coding"; transcript_biotype "circRNA"; oId "lv:circDDAH1-1491-001"; tissue "lv";
1	ncSplice	exon	85350415	85350534	.	-	.	gene_id "ENSG00000153904"; transcript_id "hsCircRNA-265"; exon_number "1" gene_name "DDAH1"; gene_biotype "protein_coding"; oId "lv:circDDAH1-1491-001"; tissue "lv";
1	ncSplice	exon	85351506	85351579	.	-	.	gene_id "ENSG00000153904"; transcript_id "hsCircRNA-265"; exon_number "2" gene_name "DDAH1"; gene_biotype "protein_coding"; oId "lv:circDDAH1-1491-001"; tissue "lv";
1	ncSplice	exon	85358748	85358847	.	-	.	gene_id "ENSG00000153904"; transcript_id "hsCircRNA-265"; exon_number "3" gene_name "DDAH1"; gene_biotype "protein_coding"; oId "lv:circDDAH1-1491-001"; tissue "lv";
1	ncSplice	gene	8541214	8614686	.	-	.	gene_id "ENSG00000142599"; gene_name "RERE"; gene_source "ncSplice"; gene_biotype "protein_coding";
1	ncSplice	transcript	8541214	8614686	.	-	.	gene_id "ENSG00000142599"; transcript_id "hsCircRNA-266"; gene_name "RERE"; gene_biotype "protein_coding"; transcript_biotype "circRNA"; oId "lv:circRERE-1494-001|ce:circRERE-6722-006|ts:circRERE-6571-004"; tissue "lv|ce|ts";
1	ncSplice	exon	8541214	8541318	.	-	.	gene_id "ENSG00000142599"; transcript_id "hsCircRNA-266"; exon_number "1" gene_name "RERE"; gene_biotype "protein_coding"; oId "lv:circRERE-1494-001|ce:circRERE-6722-006|ts:circRERE-6571-004"; tissue "lv|ce|ts";
1	ncSplice	exon	8556475	8556571	.	-	.	gene_id "ENSG00000142599"; transcript_id "hsCircRNA-266"; exon_number "2" gene_name "RERE"; gene_biotype "protein_coding"; oId "lv:circRERE-1494-001|ce:circRERE-6722-006|ts:circRERE-6571-004"; tissue "lv|ce|ts";
1	ncSplice	exon	8557418	8557523	.	-	.	gene_id "ENSG00000142599"; transcript_id "hsCircRNA-266"; exon_number "3" gene_name "RERE"; gene_biotype "protein_coding"; oId "lv:circRERE-1494-001|ce:circRERE-6722-006|ts:circRERE-6571-004"; tissue "lv|ce|ts";
1	ncSplice	exon	8614561	8614686	.	-	.	gene_id "ENSG00000142599"; transcript_id "hsCircRNA-266"; exon_number "4" gene_name "RERE"; gene_biotype "protein_coding"; oId "lv:circRERE-1494-001|ce:circRERE-6722-006|ts:circRERE-6571-004"; tissue "lv|ce|ts";
18	ncSplice	gene	54271360	54274090	.	+	.	gene_id "ENSG00000101751"; gene_name "POLI"; gene_source "ncSplice"; gene_biotype "protein_coding";
18	ncSplice	transcript	54271360	54274090	.	+	.	gene_id "ENSG00000101751"; transcript_id "hsCircRNA-267"; gene_name "POLI"; gene_biotype "protein_coding"; transcript_biotype "circRNA"; oId "lv:circPOLI-1495-001|ce:circPOLI-6727-001|ts:circPOLI-6574-002"; tissue "lv|ce|ts";
18	ncSplice	exon	54271360	54271485	.	+	.	gene_id "ENSG00000101751"; transcript_id "hsCircRNA-267"; exon_number "1" gene_name "POLI"; gene_biotype "protein_coding"; oId "lv:circPOLI-1495-001|ce:circPOLI-6727-001|ts:circPOLI-6574-002"; tissue "lv|ce|ts";
18	ncSplice	exon	54273926	54274090	.	+	.	gene_id "ENSG00000101751"; transcript_id "hsCircRNA-267"; exon_number "2" gene_name "POLI"; gene_biotype "protein_coding"; oId "lv:circPOLI-1495-001|ce:circPOLI-6727-001|ts:circPOLI-6574-002"; tissue "lv|ce|ts";
18	ncSplice	gene	62539681	62550460	.	+	.	gene_id "ENSG00000141664"; gene_name "ZCCHC2"; gene_source "ncSplice"; gene_biotype "protein_coding";
18	ncSplice	transcript	62539681	62550460	.	+	.	gene_id "ENSG00000141664"; transcript_id "hsCircRNA-268"; gene_name "ZCCHC2"; gene_biotype "protein_coding"; transcript_biotype "circRNA"; oId "lv:circZCCHC2-1504-001"; tissue "lv";
18	ncSplice	exon	62539681	62539792	.	+	.	gene_id "ENSG00000141664"; transcript_id "hsCircRNA-268"; exon_number "1" gene_name "ZCCHC2"; gene_biotype "protein_coding"; oId "lv:circZCCHC2-1504-001"; tissue "lv";
18	ncSplice	exon	62542498	62542574	.	+	.	gene_id "ENSG00000141664"; transcript_id "hsCircRNA-268"; exon_number "2" gene_name "ZCCHC2"; gene_biotype "protein_coding"; oId "lv:circZCCHC2-1504-001"; tissue "lv";
18	ncSplice	exon	62544802	62544873	.	+	.	gene_id "ENSG00000141664"; transcript_id "hsCircRNA-268"; exon_number "3" gene_name "ZCCHC2"; gene_biotype "protein_coding"; oId "lv:circZCCHC2-1504-001"; tissue "lv";
18	ncSplice	exon	62550348	62550460	.	+	.	gene_id "ENSG00000141664"; transcript_id "hsCircRNA-268"; exon_number "4" gene_name "ZCCHC2"; gene_biotype "protein_coding"; oId "lv:circZCCHC2-1504-001"; tissue "lv";
18	ncSplice	gene	6263947	6312056	.	-	.	gene_id "ENSG00000154655"; gene_name "L3MBTL4"; gene_source "ncSplice"; gene_biotype "protein_coding";
18	ncSplice	transcript	6263947	6312056	.	-	.	gene_id "ENSG00000154655"; transcript_id "hsCircRNA-269"; gene_name "L3MBTL4"; gene_biotype "protein_coding"; transcript_biotype "circRNA"; oId "lv:circL3MBTL4-1507-001"; tissue "lv";
18	ncSplice	exon	6263947	6264038	.	-	.	gene_id "ENSG00000154655"; transcript_id "hsCircRNA-269"; exon_number "1" gene_name "L3MBTL4"; gene_biotype "protein_coding"; oId "lv:circL3MBTL4-1507-001"; tissue "lv";
18	ncSplice	exon	6301903	6301957	.	-	.	gene_id "ENSG00000154655"; transcript_id "hsCircRNA-269"; exon_number "2" gene_name "L3MBTL4"; gene_biotype "protein_coding"; oId "lv:circL3MBTL4-1507-001"; tissue "lv";
18	ncSplice	exon	6311554	6311656	.	-	.	gene_id "ENSG00000154655"; transcript_id "hsCircRNA-269"; exon_number "3" gene_name "L3MBTL4"; gene_biotype "protein_coding"; oId "lv:circL3MBTL4-1507-001"; tissue "lv";
18	ncSplice	exon	6311998	6312056	.	-	.	gene_id "ENSG00000154655"; transcript_id "hsCircRNA-269"; exon_number "4" gene_name "L3MBTL4"; gene_biotype "protein_coding"; oId "lv:circL3MBTL4-1507-001"; tissue "lv";
18	ncSplice	gene	6301903	6312056	.	-	.	gene_id "ENSG00000154655"; gene_name "L3MBTL4"; gene_source "ncSplice"; gene_biotype "protein_coding";
18	ncSplice	transcript	6301903	6312056	.	-	.	gene_id "ENSG00000154655"; transcript_id "hsCircRNA-270"; gene_name "L3MBTL4"; gene_biotype "protein_coding"; transcript_biotype "circRNA"; oId "lv:circL3MBTL4-1508-001"; tissue "lv";
18	ncSplice	exon	6301903	6301957	.	-	.	gene_id "ENSG00000154655"; transcript_id "hsCircRNA-270"; exon_number "1" gene_name "L3MBTL4"; gene_biotype "protein_coding"; oId "lv:circL3MBTL4-1508-001"; tissue "lv";
18	ncSplice	exon	6311554	6311656	.	-	.	gene_id "ENSG00000154655"; transcript_id "hsCircRNA-270"; exon_number "2" gene_name "L3MBTL4"; gene_biotype "protein_coding"; oId "lv:circL3MBTL4-1508-001"; tissue "lv";
18	ncSplice	exon	6311998	6312056	.	-	.	gene_id "ENSG00000154655"; transcript_id "hsCircRNA-270"; exon_number "3" gene_name "L3MBTL4"; gene_biotype "protein_coding"; oId "lv:circL3MBTL4-1508-001"; tissue "lv";
18	ncSplice	gene	76849526	76851939	.	+	.	gene_id "ENSG00000130856"; gene_name "ZNF236"; gene_source "ncSplice"; gene_biotype "protein_coding";
18	ncSplice	transcript	76849526	76851939	.	+	.	gene_id "ENSG00000130856"; transcript_id "hsCircRNA-271"; gene_name "ZNF236"; gene_biotype "protein_coding"; transcript_biotype "circRNA"; oId "lv:circZNF236-1511-001|ce:circZNF236-6794-001|ts:circZNF236-6674-001"; tissue "lv|ce|ts";
18	ncSplice	exon	76849526	76849668	.	+	.	gene_id "ENSG00000130856"; transcript_id "hsCircRNA-271"; exon_number "1" gene_name "ZNF236"; gene_biotype "protein_coding"; oId "lv:circZNF236-1511-001|ce:circZNF236-6794-001|ts:circZNF236-6674-001"; tissue "lv|ce|ts";
18	ncSplice	exon	76851775	76851939	.	+	.	gene_id "ENSG00000130856"; transcript_id "hsCircRNA-271"; exon_number "2" gene_name "ZNF236"; gene_biotype "protein_coding"; oId "lv:circZNF236-1511-001|ce:circZNF236-6794-001|ts:circZNF236-6674-001"; tissue "lv|ce|ts";
18	ncSplice	gene	9182382	9221999	.	+	.	gene_id "ENSG00000101745"; gene_name "ANKRD12"; gene_source "ncSplice"; gene_biotype "protein_coding";
18	ncSplice	transcript	9182382	9221999	.	+	.	gene_id "ENSG00000101745"; transcript_id "hsCircRNA-272"; gene_name "ANKRD12"; gene_biotype "protein_coding"; transcript_biotype "circRNA"; oId "lv:circANKRD12-1520-006"; tissue "lv";
18	ncSplice	exon	9182382	9195698	.	+	.	gene_id "ENSG00000101745"; transcript_id "hsCircRNA-272"; exon_number "1" gene_name "ANKRD12"; gene_biotype "protein_coding"; oId "lv:circANKRD12-1520-006"; tissue "lv";
18	ncSplice	exon	9208657	9208803	.	+	.	gene_id "ENSG00000101745"; transcript_id "hsCircRNA-272"; exon_number "2" gene_name "ANKRD12"; gene_biotype "protein_coding"; oId "lv:circANKRD12-1520-006"; tissue "lv";
18	ncSplice	exon	9211584	9211784	.	+	.	gene_id "ENSG00000101745"; transcript_id "hsCircRNA-272"; exon_number "3" gene_name "ANKRD12"; gene_biotype "protein_coding"; oId "lv:circANKRD12-1520-006"; tissue "lv";
18	ncSplice	exon	9216758	9216900	.	+	.	gene_id "ENSG00000101745"; transcript_id "hsCircRNA-272"; exon_number "4" gene_name "ANKRD12"; gene_biotype "protein_coding"; oId "lv:circANKRD12-1520-006"; tissue "lv";
18	ncSplice	exon	9221852	9221999	.	+	.	gene_id "ENSG00000101745"; transcript_id "hsCircRNA-272"; exon_number "5" gene_name "ANKRD12"; gene_biotype "protein_coding"; oId "lv:circANKRD12-1520-006"; tissue "lv";
18	ncSplice	gene	9195551	9221999	.	+	.	gene_id "ENSG00000101745"; gene_name "ANKRD12"; gene_source "ncSplice"; gene_biotype "protein_coding";
18	ncSplice	transcript	9195551	9221999	.	+	.	gene_id "ENSG00000101745"; transcript_id "hsCircRNA-273"; gene_name "ANKRD12"; gene_biotype "protein_coding"; transcript_biotype "circRNA"; oId "lv:circANKRD12-1521-006"; tissue "lv";
18	ncSplice	exon	9195551	9195698	.	+	.	gene_id "ENSG00000101745"; transcript_id "hsCircRNA-273"; exon_number "1" gene_name "ANKRD12"; gene_biotype "protein_coding"; oId "lv:circANKRD12-1521-006"; tissue "lv";
18	ncSplice	exon	9208657	9208803	.	+	.	gene_id "ENSG00000101745"; transcript_id "hsCircRNA-273"; exon_number "2" gene_name "ANKRD12"; gene_biotype "protein_coding"; oId "lv:circANKRD12-1521-006"; tissue "lv";
18	ncSplice	exon	9211584	9211784	.	+	.	gene_id "ENSG00000101745"; transcript_id "hsCircRNA-273"; exon_number "3" gene_name "ANKRD12"; gene_biotype "protein_coding"; oId "lv:circANKRD12-1521-006"; tissue "lv";
18	ncSplice	exon	9216758	9216900	.	+	.	gene_id "ENSG00000101745"; transcript_id "hsCircRNA-273"; exon_number "4" gene_name "ANKRD12"; gene_biotype "protein_coding"; oId "lv:circANKRD12-1521-006"; tissue "lv";
18	ncSplice	exon	9221852	9221999	.	+	.	gene_id "ENSG00000101745"; transcript_id "hsCircRNA-273"; exon_number "5" gene_name "ANKRD12"; gene_biotype "protein_coding"; oId "lv:circANKRD12-1521-006"; tissue "lv";
18	ncSplice	gene	9931810	9937066	.	+	.	gene_id "ENSG00000101558"; gene_name "VAPA"; gene_source "ncSplice"; gene_biotype "protein_coding";
18	ncSplice	transcript	9931810	9937066	.	+	.	gene_id "ENSG00000101558"; transcript_id "hsCircRNA-274"; gene_name "VAPA"; gene_biotype "protein_coding"; transcript_biotype "circRNA"; oId "lv:circVAPA-1525-001"; tissue "lv";
18	ncSplice	exon	9931810	9931962	.	+	.	gene_id "ENSG00000101558"; transcript_id "hsCircRNA-274"; exon_number "1" gene_name "VAPA"; gene_biotype "protein_coding"; oId "lv:circVAPA-1525-001"; tissue "lv";
18	ncSplice	exon	9936110	9936213	.	+	.	gene_id "ENSG00000101558"; transcript_id "hsCircRNA-274"; exon_number "2" gene_name "VAPA"; gene_biotype "protein_coding"; oId "lv:circVAPA-1525-001"; tissue "lv";
18	ncSplice	exon	9936986	9937066	.	+	.	gene_id "ENSG00000101558"; transcript_id "hsCircRNA-274"; exon_number "3" gene_name "VAPA"; gene_biotype "protein_coding"; oId "lv:circVAPA-1525-001"; tissue "lv";
19	ncSplice	gene	10055247	10055761	.	+	.	gene_id "ENSG00000167798"; gene_name "C3P1"; gene_source "ncSplice"; gene_biotype "transcribed_unprocessed_pseudogene";
19	ncSplice	transcript	10055247	10055761	.	+	.	gene_id "ENSG00000167798"; transcript_id "hsCircRNA-275"; gene_name "C3P1"; gene_biotype "transcribed_unprocessed_pseudogene"; transcript_biotype "circRNA"; oId "lv:circC3P1-1526-001"; tissue "lv";
19	ncSplice	exon	10055247	10055322	.	+	.	gene_id "ENSG00000167798"; transcript_id "hsCircRNA-275"; exon_number "1" gene_name "C3P1"; gene_biotype "transcribed_unprocessed_pseudogene"; oId "lv:circC3P1-1526-001"; tissue "lv";
19	ncSplice	exon	10055593	10055761	.	+	.	gene_id "ENSG00000167798"; transcript_id "hsCircRNA-275"; exon_number "2" gene_name "C3P1"; gene_biotype "transcribed_unprocessed_pseudogene"; oId "lv:circC3P1-1526-001"; tissue "lv";
19	ncSplice	gene	10072924	10073435	.	+	.	gene_id "ENSG00000167798"; gene_name "C3P1"; gene_source "ncSplice"; gene_biotype "transcribed_unprocessed_pseudogene";
19	ncSplice	transcript	10072924	10073435	.	+	.	gene_id "ENSG00000167798"; transcript_id "hsCircRNA-276"; gene_name "C3P1"; gene_biotype "transcribed_unprocessed_pseudogene"; transcript_biotype "circRNA"; oId "lv:circC3P1-1530-001"; tissue "lv";
19	ncSplice	exon	10072924	10073010	.	+	.	gene_id "ENSG00000167798"; transcript_id "hsCircRNA-276"; exon_number "1" gene_name "C3P1"; gene_biotype "transcribed_unprocessed_pseudogene"; oId "lv:circC3P1-1530-001"; tissue "lv";
19	ncSplice	exon	10073090	10073179	.	+	.	gene_id "ENSG00000167798"; transcript_id "hsCircRNA-276"; exon_number "2" gene_name "C3P1"; gene_biotype "transcribed_unprocessed_pseudogene"; oId "lv:circC3P1-1530-001"; tissue "lv";
19	ncSplice	exon	10073300	10073435	.	+	.	gene_id "ENSG00000167798"; transcript_id "hsCircRNA-276"; exon_number "3" gene_name "C3P1"; gene_biotype "transcribed_unprocessed_pseudogene"; oId "lv:circC3P1-1530-001"; tissue "lv";
19	ncSplice	gene	12928342	12928847	.	-	.	gene_id "ENSG00000179115"; gene_name "FARSA"; gene_source "ncSplice"; gene_biotype "protein_coding";
19	ncSplice	transcript	12928342	12928847	.	-	.	gene_id "ENSG00000179115"; transcript_id "hsCircRNA-277"; gene_name "FARSA"; gene_biotype "protein_coding"; transcript_biotype "circRNA"; oId "lv:circFARSA-1545-001|ce:circFARSA-6925-001|ts:circFARSA-6798-001"; tissue "lv|ce|ts";
19	ncSplice	exon	12928342	12928457	.	-	.	gene_id "ENSG00000179115"; transcript_id "hsCircRNA-277"; exon_number "1" gene_name "FARSA"; gene_biotype "protein_coding"; oId "lv:circFARSA-1545-001|ce:circFARSA-6925-001|ts:circFARSA-6798-001"; tissue "lv|ce|ts";
19	ncSplice	exon	12928535	12928663	.	-	.	gene_id "ENSG00000179115"; transcript_id "hsCircRNA-277"; exon_number "2" gene_name "FARSA"; gene_biotype "protein_coding"; oId "lv:circFARSA-1545-001|ce:circFARSA-6925-001|ts:circFARSA-6798-001"; tissue "lv|ce|ts";
19	ncSplice	exon	12928755	12928847	.	-	.	gene_id "ENSG00000179115"; transcript_id "hsCircRNA-277"; exon_number "3" gene_name "FARSA"; gene_biotype "protein_coding"; oId "lv:circFARSA-1545-001|ce:circFARSA-6925-001|ts:circFARSA-6798-001"; tissue "lv|ce|ts";
19	ncSplice	gene	15695936	15697070	.	+	.	gene_id "ENSG00000186204"; gene_name "CYP4F12"; gene_source "ncSplice"; gene_biotype "protein_coding";
19	ncSplice	transcript	15695936	15697070	.	+	.	gene_id "ENSG00000186204"; transcript_id "hsCircRNA-278"; gene_name "CYP4F12"; gene_biotype "protein_coding"; transcript_biotype "circRNA"; oId "lv:circCYP4F12-1546-001"; tissue "lv";
19	ncSplice	exon	15695936	15696069	.	+	.	gene_id "ENSG00000186204"; transcript_id "hsCircRNA-278"; exon_number "1" gene_name "CYP4F12"; gene_biotype "protein_coding"; oId "lv:circCYP4F12-1546-001"; tissue "lv";
19	ncSplice	exon	15696161	15696225	.	+	.	gene_id "ENSG00000186204"; transcript_id "hsCircRNA-278"; exon_number "2" gene_name "CYP4F12"; gene_biotype "protein_coding"; oId "lv:circCYP4F12-1546-001"; tissue "lv";
19	ncSplice	exon	15696430	15696512	.	+	.	gene_id "ENSG00000186204"; transcript_id "hsCircRNA-278"; exon_number "3" gene_name "CYP4F12"; gene_biotype "protein_coding"; oId "lv:circCYP4F12-1546-001"; tissue "lv";
19	ncSplice	exon	15696908	15697070	.	+	.	gene_id "ENSG00000186204"; transcript_id "hsCircRNA-278"; exon_number "4" gene_name "CYP4F12"; gene_biotype "protein_coding"; oId "lv:circCYP4F12-1546-001"; tissue "lv";
19	ncSplice	gene	17276495	17276909	.	+	.	gene_id "ENSG00000105393"; gene_name "BABAM1"; gene_source "ncSplice"; gene_biotype "protein_coding";
19	ncSplice	transcript	17276495	17276909	.	+	.	gene_id "ENSG00000105393"; transcript_id "hsCircRNA-279"; gene_name "BABAM1"; gene_biotype "protein_coding"; transcript_biotype "circRNA"; oId "lv:circBABAM1-1551-001"; tissue "lv";
19	ncSplice	exon	17276495	17276624	.	+	.	gene_id "ENSG00000105393"; transcript_id "hsCircRNA-279"; exon_number "1" gene_name "BABAM1"; gene_biotype "protein_coding"; oId "lv:circBABAM1-1551-001"; tissue "lv";
19	ncSplice	exon	17276823	17276909	.	+	.	gene_id "ENSG00000105393"; transcript_id "hsCircRNA-279"; exon_number "2" gene_name "BABAM1"; gene_biotype "protein_coding"; oId "lv:circBABAM1-1551-001"; tissue "lv";
19	ncSplice	gene	18537601	18538436	.	-	.	gene_id "ENSG00000105701"; gene_name "FKBP8"; gene_source "ncSplice"; gene_biotype "protein_coding";
19	ncSplice	transcript	18537601	18538436	.	-	.	gene_id "ENSG00000105701"; transcript_id "hsCircRNA-280"; gene_name "FKBP8"; gene_biotype "protein_coding"; transcript_biotype "circRNA"; oId "lv:circFKBP8-1552-001|ce:circFKBP8-6983-001"; tissue "lv|ce";
19	ncSplice	exon	18537601	18537773	.	-	.	gene_id "ENSG00000105701"; transcript_id "hsCircRNA-280"; exon_number "1" gene_name "FKBP8"; gene_biotype "protein_coding"; oId "lv:circFKBP8-1552-001|ce:circFKBP8-6983-001"; tissue "lv|ce";
19	ncSplice	exon	18538216	18538436	.	-	.	gene_id "ENSG00000105701"; transcript_id "hsCircRNA-280"; exon_number "2" gene_name "FKBP8"; gene_biotype "protein_coding"; oId "lv:circFKBP8-1552-001|ce:circFKBP8-6983-001"; tissue "lv|ce";
19	ncSplice	gene	18539371	18539720	.	-	.	gene_id "ENSG00000105701"; gene_name "FKBP8"; gene_source "ncSplice"; gene_biotype "protein_coding";
19	ncSplice	transcript	18539371	18539720	.	-	.	gene_id "ENSG00000105701"; transcript_id "hsCircRNA-281"; gene_name "FKBP8"; gene_biotype "protein_coding"; transcript_biotype "circRNA"; oId "lv:circFKBP8-1553-001|ts:circFKBP8-6844-001"; tissue "lv|ts";
19	ncSplice	exon	18539371	18539459	.	-	.	gene_id "ENSG00000105701"; transcript_id "hsCircRNA-281"; exon_number "1" gene_name "FKBP8"; gene_biotype "protein_coding"; oId "lv:circFKBP8-1553-001|ts:circFKBP8-6844-001"; tissue "lv|ts";
19	ncSplice	exon	18539551	18539720	.	-	.	gene_id "ENSG00000105701"; transcript_id "hsCircRNA-281"; exon_number "2" gene_name "FKBP8"; gene_biotype "protein_coding"; oId "lv:circFKBP8-1553-001|ts:circFKBP8-6844-001"; tissue "lv|ts";
19	ncSplice	gene	20645684	20646405	.	-	.	gene_id "ENSG00000188171"; gene_name "ZNF626"; gene_source "ncSplice"; gene_biotype "protein_coding";
19	ncSplice	transcript	20645684	20646405	.	-	.	gene_id "ENSG00000188171"; transcript_id "hsCircRNA-282"; gene_name "ZNF626"; gene_biotype "protein_coding"; transcript_biotype "circRNA"; oId "lv:circZNF626-1555-001"; tissue "lv";
19	ncSplice	exon	20645684	20645779	.	-	.	gene_id "ENSG00000188171"; transcript_id "hsCircRNA-282"; exon_number "1" gene_name "ZNF626"; gene_biotype "protein_coding"; oId "lv:circZNF626-1555-001"; tissue "lv";
19	ncSplice	exon	20646279	20646405	.	-	.	gene_id "ENSG00000188171"; transcript_id "hsCircRNA-282"; exon_number "2" gene_name "ZNF626"; gene_biotype "protein_coding"; oId "lv:circZNF626-1555-001"; tissue "lv";
1	ncSplice	gene	92333391	92380873	.	+	.	gene_id "ENSG00000122484"; gene_name "RPAP2"; gene_source "ncSplice"; gene_biotype "protein_coding";
1	ncSplice	transcript	92333391	92380873	.	+	.	gene_id "ENSG00000122484"; transcript_id "hsCircRNA-283"; gene_name "RPAP2"; gene_biotype "protein_coding"; transcript_biotype "circRNA"; oId "lv:circRPAP2-1558-001|ce:circRPAP2-7004-001|ts:circRPAP2-6878-001"; tissue "lv|ce|ts";
1	ncSplice	exon	92333391	92333473	.	+	.	gene_id "ENSG00000122484"; transcript_id "hsCircRNA-283"; exon_number "1" gene_name "RPAP2"; gene_biotype "protein_coding"; oId "lv:circRPAP2-1558-001|ce:circRPAP2-7004-001|ts:circRPAP2-6878-001"; tissue "lv|ce|ts";
1	ncSplice	exon	92336347	92336427	.	+	.	gene_id "ENSG00000122484"; transcript_id "hsCircRNA-283"; exon_number "2" gene_name "RPAP2"; gene_biotype "protein_coding"; oId "lv:circRPAP2-1558-001|ce:circRPAP2-7004-001|ts:circRPAP2-6878-001"; tissue "lv|ce|ts";
1	ncSplice	exon	92345846	92345914	.	+	.	gene_id "ENSG00000122484"; transcript_id "hsCircRNA-283"; exon_number "3" gene_name "RPAP2"; gene_biotype "protein_coding"; oId "lv:circRPAP2-1558-001|ce:circRPAP2-7004-001|ts:circRPAP2-6878-001"; tissue "lv|ce|ts";
1	ncSplice	exon	92380724	92380873	.	+	.	gene_id "ENSG00000122484"; transcript_id "hsCircRNA-283"; exon_number "4" gene_name "RPAP2"; gene_biotype "protein_coding"; oId "lv:circRPAP2-1558-001|ce:circRPAP2-7004-001|ts:circRPAP2-6878-001"; tissue "lv|ce|ts";
1	ncSplice	gene	92563642	92636336	.	-	.	gene_id "ENSG00000067208"; gene_name "EVI5"; gene_source "ncSplice"; gene_biotype "protein_coding";
1	ncSplice	transcript	92563642	92636336	.	-	.	gene_id "ENSG00000067208"; transcript_id "hsCircRNA-284"; gene_name "EVI5"; gene_biotype "protein_coding"; transcript_biotype "circRNA"; oId "lv:circEVI5-1561-001|ce:circEVI5-7008-005|ts:circEVI5-6882-002"; tissue "lv|ce|ts";
1	ncSplice	exon	92563642	92563737	.	-	.	gene_id "ENSG00000067208"; transcript_id "hsCircRNA-284"; exon_number "1" gene_name "EVI5"; gene_biotype "protein_coding"; oId "lv:circEVI5-1561-001|ce:circEVI5-7008-005|ts:circEVI5-6882-002"; tissue "lv|ce|ts";
1	ncSplice	exon	92605307	92605402	.	-	.	gene_id "ENSG00000067208"; transcript_id "hsCircRNA-284"; exon_number "2" gene_name "EVI5"; gene_biotype "protein_coding"; oId "lv:circEVI5-1561-001|ce:circEVI5-7008-005|ts:circEVI5-6882-002"; tissue "lv|ce|ts";
1	ncSplice	exon	92607581	92607727	.	-	.	gene_id "ENSG00000067208"; transcript_id "hsCircRNA-284"; exon_number "3" gene_name "EVI5"; gene_biotype "protein_coding"; oId "lv:circEVI5-1561-001|ce:circEVI5-7008-005|ts:circEVI5-6882-002"; tissue "lv|ce|ts";
1	ncSplice	exon	92624176	92624334	.	-	.	gene_id "ENSG00000067208"; transcript_id "hsCircRNA-284"; exon_number "4" gene_name "EVI5"; gene_biotype "protein_coding"; oId "lv:circEVI5-1561-001|ce:circEVI5-7008-005|ts:circEVI5-6882-002"; tissue "lv|ce|ts";
1	ncSplice	exon	92625794	92625934	.	-	.	gene_id "ENSG00000067208"; transcript_id "hsCircRNA-284"; exon_number "5" gene_name "EVI5"; gene_biotype "protein_coding"; oId "lv:circEVI5-1561-001|ce:circEVI5-7008-005|ts:circEVI5-6882-002"; tissue "lv|ce|ts";
1	ncSplice	exon	92636202	92636336	.	-	.	gene_id "ENSG00000067208"; transcript_id "hsCircRNA-284"; exon_number "6" gene_name "EVI5"; gene_biotype "protein_coding"; oId "lv:circEVI5-1561-001|ce:circEVI5-7008-005|ts:circEVI5-6882-002"; tissue "lv|ce|ts";
19	ncSplice	gene	34430576	34434968	.	+	.	gene_id "ENSG00000126261"; gene_name "UBA2"; gene_source "ncSplice"; gene_biotype "protein_coding";
19	ncSplice	transcript	34430576	34434968	.	+	.	gene_id "ENSG00000126261"; transcript_id "hsCircRNA-285"; gene_name "UBA2"; gene_biotype "protein_coding"; transcript_biotype "circRNA"; oId "lv:circUBA2-1569-001|ce:circUBA2-7059-001|ts:circUBA2-6924-001"; tissue "lv|ce|ts";
19	ncSplice	exon	34430576	34430659	.	+	.	gene_id "ENSG00000126261"; transcript_id "hsCircRNA-285"; exon_number "1" gene_name "UBA2"; gene_biotype "protein_coding"; oId "lv:circUBA2-1569-001|ce:circUBA2-7059-001|ts:circUBA2-6924-001"; tissue "lv|ce|ts";
19	ncSplice	exon	34431861	34431931	.	+	.	gene_id "ENSG00000126261"; transcript_id "hsCircRNA-285"; exon_number "2" gene_name "UBA2"; gene_biotype "protein_coding"; oId "lv:circUBA2-1569-001|ce:circUBA2-7059-001|ts:circUBA2-6924-001"; tissue "lv|ce|ts";
19	ncSplice	exon	34433348	34433412	.	+	.	gene_id "ENSG00000126261"; transcript_id "hsCircRNA-285"; exon_number "3" gene_name "UBA2"; gene_biotype "protein_coding"; oId "lv:circUBA2-1569-001|ce:circUBA2-7059-001|ts:circUBA2-6924-001"; tissue "lv|ce|ts";
19	ncSplice	exon	34434868	34434968	.	+	.	gene_id "ENSG00000126261"; transcript_id "hsCircRNA-285"; exon_number "4" gene_name "UBA2"; gene_biotype "protein_coding"; oId "lv:circUBA2-1569-001|ce:circUBA2-7059-001|ts:circUBA2-6924-001"; tissue "lv|ce|ts";
19	ncSplice	gene	40583398	40583717	.	+	.	gene_id "ENSG00000160410"; gene_name "SHKBP1"; gene_source "ncSplice"; gene_biotype "protein_coding";
19	ncSplice	transcript	40583398	40583717	.	+	.	gene_id "ENSG00000160410"; transcript_id "hsCircRNA-286"; gene_name "SHKBP1"; gene_biotype "protein_coding"; transcript_biotype "circRNA"; oId "lv:circSHKBP1-1584-001"; tissue "lv";
19	ncSplice	exon	40583398	40583485	.	+	.	gene_id "ENSG00000160410"; transcript_id "hsCircRNA-286"; exon_number "1" gene_name "SHKBP1"; gene_biotype "protein_coding"; oId "lv:circSHKBP1-1584-001"; tissue "lv";
19	ncSplice	exon	40583601	40583717	.	+	.	gene_id "ENSG00000160410"; transcript_id "hsCircRNA-286"; exon_number "2" gene_name "SHKBP1"; gene_biotype "protein_coding"; oId "lv:circSHKBP1-1584-001"; tissue "lv";
19	ncSplice	gene	45263113	45263367	.	+	.	gene_id "ENSG00000007047"; gene_name "MARK4"; gene_source "ncSplice"; gene_biotype "protein_coding";
19	ncSplice	transcript	45263113	45263367	.	+	.	gene_id "ENSG00000007047"; transcript_id "hsCircRNA-287"; gene_name "MARK4"; gene_biotype "protein_coding"; transcript_biotype "circRNA"; oId "lv:circMARK4-1593-001|ts:circMARK4-7024-001"; tissue "lv|ts";
19	ncSplice	exon	45263113	45263166	.	+	.	gene_id "ENSG00000007047"; transcript_id "hsCircRNA-287"; exon_number "1" gene_name "MARK4"; gene_biotype "protein_coding"; oId "lv:circMARK4-1593-001|ts:circMARK4-7024-001"; tissue "lv|ts";
19	ncSplice	exon	45263319	45263367	.	+	.	gene_id "ENSG00000007047"; transcript_id "hsCircRNA-287"; exon_number "2" gene_name "MARK4"; gene_biotype "protein_coding"; oId "lv:circMARK4-1593-001|ts:circMARK4-7024-001"; tissue "lv|ts";
19	ncSplice	gene	5047476	5082504	.	+	.	gene_id "ENSG00000127663"; gene_name "KDM4B"; gene_source "ncSplice"; gene_biotype "protein_coding";
19	ncSplice	transcript	5047476	5082504	.	+	.	gene_id "ENSG00000127663"; transcript_id "hsCircRNA-288"; gene_name "KDM4B"; gene_biotype "protein_coding"; transcript_biotype "circRNA"; oId "lv:circKDM4B-1606-001"; tissue "lv";
19	ncSplice	exon	5047476	5047669	.	+	.	gene_id "ENSG00000127663"; transcript_id "hsCircRNA-288"; exon_number "1" gene_name "KDM4B"; gene_biotype "protein_coding"; oId "lv:circKDM4B-1606-001"; tissue "lv";
19	ncSplice	exon	5071010	5071059	.	+	.	gene_id "ENSG00000127663"; transcript_id "hsCircRNA-288"; exon_number "2" gene_name "KDM4B"; gene_biotype "protein_coding"; oId "lv:circKDM4B-1606-001"; tissue "lv";
19	ncSplice	exon	5077367	5077470	.	+	.	gene_id "ENSG00000127663"; transcript_id "hsCircRNA-288"; exon_number "3" gene_name "KDM4B"; gene_biotype "protein_coding"; oId "lv:circKDM4B-1606-001"; tissue "lv";
19	ncSplice	exon	5082367	5082504	.	+	.	gene_id "ENSG00000127663"; transcript_id "hsCircRNA-288"; exon_number "4" gene_name "KDM4B"; gene_biotype "protein_coding"; oId "lv:circKDM4B-1606-001"; tissue "lv";
1	ncSplice	gene	95138275	95173889	.	+	.	gene_id "ENSG00000152078"; gene_name "TMEM56"; gene_source "ncSplice"; gene_biotype "protein_coding";
1	ncSplice	transcript	95138275	95173889	.	+	.	gene_id "ENSG00000152078"; transcript_id "hsCircRNA-289"; gene_name "TMEM56"; gene_biotype "protein_coding"; transcript_biotype "circRNA"; oId "lv:circTMEM56-1608-001"; tissue "lv";
1	ncSplice	exon	95138275	95140742	.	+	.	gene_id "ENSG00000152078"; transcript_id "hsCircRNA-289"; exon_number "1" gene_name "TMEM56"; gene_biotype "protein_coding"; oId "lv:circTMEM56-1608-001"; tissue "lv";
1	ncSplice	exon	95143891	95144056	.	+	.	gene_id "ENSG00000152078"; transcript_id "hsCircRNA-289"; exon_number "2" gene_name "TMEM56"; gene_biotype "protein_coding"; oId "lv:circTMEM56-1608-001"; tissue "lv";
1	ncSplice	exon	95148702	95148791	.	+	.	gene_id "ENSG00000152078"; transcript_id "hsCircRNA-289"; exon_number "3" gene_name "TMEM56"; gene_biotype "protein_coding"; oId "lv:circTMEM56-1608-001"; tissue "lv";
1	ncSplice	exon	95150208	95150266	.	+	.	gene_id "ENSG00000152078"; transcript_id "hsCircRNA-289"; exon_number "4" gene_name "TMEM56"; gene_biotype "protein_coding"; oId "lv:circTMEM56-1608-001"; tissue "lv";
1	ncSplice	exon	95151325	95151419	.	+	.	gene_id "ENSG00000152078"; transcript_id "hsCircRNA-289"; exon_number "5" gene_name "TMEM56"; gene_biotype "protein_coding"; oId "lv:circTMEM56-1608-001"; tissue "lv";
1	ncSplice	exon	95173816	95173889	.	+	.	gene_id "ENSG00000152078"; transcript_id "hsCircRNA-289"; exon_number "6" gene_name "TMEM56"; gene_biotype "protein_coding"; oId "lv:circTMEM56-1608-001"; tissue "lv";
1	ncSplice	gene	95143891	95173889	.	+	.	gene_id "ENSG00000152078"; gene_name "TMEM56"; gene_source "ncSplice"; gene_biotype "protein_coding";
1	ncSplice	transcript	95143891	95173889	.	+	.	gene_id "ENSG00000152078"; transcript_id "hsCircRNA-290"; gene_name "TMEM56"; gene_biotype "protein_coding"; transcript_biotype "circRNA"; oId "lv:circTMEM56-1609-001|ce:circTMEM56-7182-001"; tissue "lv|ce";
1	ncSplice	exon	95143891	95144056	.	+	.	gene_id "ENSG00000152078"; transcript_id "hsCircRNA-290"; exon_number "1" gene_name "TMEM56"; gene_biotype "protein_coding"; oId "lv:circTMEM56-1609-001|ce:circTMEM56-7182-001"; tissue "lv|ce";
1	ncSplice	exon	95148702	95148791	.	+	.	gene_id "ENSG00000152078"; transcript_id "hsCircRNA-290"; exon_number "2" gene_name "TMEM56"; gene_biotype "protein_coding"; oId "lv:circTMEM56-1609-001|ce:circTMEM56-7182-001"; tissue "lv|ce";
1	ncSplice	exon	95150208	95150266	.	+	.	gene_id "ENSG00000152078"; transcript_id "hsCircRNA-290"; exon_number "3" gene_name "TMEM56"; gene_biotype "protein_coding"; oId "lv:circTMEM56-1609-001|ce:circTMEM56-7182-001"; tissue "lv|ce";
1	ncSplice	exon	95151325	95151419	.	+	.	gene_id "ENSG00000152078"; transcript_id "hsCircRNA-290"; exon_number "4" gene_name "TMEM56"; gene_biotype "protein_coding"; oId "lv:circTMEM56-1609-001|ce:circTMEM56-7182-001"; tissue "lv|ce";
1	ncSplice	exon	95173816	95173889	.	+	.	gene_id "ENSG00000152078"; transcript_id "hsCircRNA-290"; exon_number "5" gene_name "TMEM56"; gene_biotype "protein_coding"; oId "lv:circTMEM56-1609-001|ce:circTMEM56-7182-001"; tissue "lv|ce";
19	ncSplice	gene	52282111	52283413	.	+	.	gene_id "ENSG00000196214"; gene_name "ZNF766"; gene_source "ncSplice"; gene_biotype "protein_coding";
19	ncSplice	transcript	52282111	52283413	.	+	.	gene_id "ENSG00000196214"; transcript_id "hsCircRNA-291"; gene_name "ZNF766"; gene_biotype "protein_coding"; transcript_biotype "circRNA"; oId "lv:circZNF766-1612-001|ce:circZNF766-7189-001"; tissue "lv|ce";
19	ncSplice	exon	52282111	52282237	.	+	.	gene_id "ENSG00000196214"; transcript_id "hsCircRNA-291"; exon_number "1" gene_name "ZNF766"; gene_biotype "protein_coding"; oId "lv:circZNF766-1612-001|ce:circZNF766-7189-001"; tissue "lv|ce";
19	ncSplice	exon	52283285	52283413	.	+	.	gene_id "ENSG00000196214"; transcript_id "hsCircRNA-291"; exon_number "2" gene_name "ZNF766"; gene_biotype "protein_coding"; oId "lv:circZNF766-1612-001|ce:circZNF766-7189-001"; tissue "lv|ce";
19	ncSplice	gene	57455653	57456182	.	-	.	gene_id "ENSG00000178201"; gene_name "VN1R1"; gene_source "ncSplice"; gene_biotype "protein_coding";
19	ncSplice	transcript	57455653	57456182	.	-	.	gene_id "ENSG00000178201"; transcript_id "hsCircRNA-292"; gene_name "VN1R1"; gene_biotype "protein_coding"; transcript_biotype "circRNA"; oId "lv:circVN1R1-1616-001|ce:circVN1R1-7218-001"; tissue "lv|ce";
19	ncSplice	exon	57455653	57455743	.	-	.	gene_id "ENSG00000178201"; transcript_id "hsCircRNA-292"; exon_number "1" gene_name "VN1R1"; gene_biotype "protein_coding"; oId "lv:circVN1R1-1616-001|ce:circVN1R1-7218-001"; tissue "lv|ce";
19	ncSplice	exon	57456126	57456182	.	-	.	gene_id "ENSG00000178201"; transcript_id "hsCircRNA-292"; exon_number "2" gene_name "VN1R1"; gene_biotype "protein_coding"; oId "lv:circVN1R1-1616-001|ce:circVN1R1-7218-001"; tissue "lv|ce";
19	ncSplice	gene	6697344	6697794	.	-	.	gene_id "ENSG00000125730"; gene_name "C3"; gene_source "ncSplice"; gene_biotype "protein_coding";
19	ncSplice	transcript	6697344	6697794	.	-	.	gene_id "ENSG00000125730"; transcript_id "hsCircRNA-293"; gene_name "C3"; gene_biotype "protein_coding"; transcript_biotype "circRNA"; oId "lv:circC3-1618-001"; tissue "lv";
19	ncSplice	exon	6697344	6697556	.	-	.	gene_id "ENSG00000125730"; transcript_id "hsCircRNA-293"; exon_number "1" gene_name "C3"; gene_biotype "protein_coding"; oId "lv:circC3-1618-001"; tissue "lv";
19	ncSplice	exon	6697652	6697794	.	-	.	gene_id "ENSG00000125730"; transcript_id "hsCircRNA-293"; exon_number "2" gene_name "C3"; gene_biotype "protein_coding"; oId "lv:circC3-1618-001"; tissue "lv";
19	ncSplice	gene	6702127	6702579	.	-	.	gene_id "ENSG00000125730"; gene_name "C3"; gene_source "ncSplice"; gene_biotype "protein_coding";
19	ncSplice	transcript	6702127	6702579	.	-	.	gene_id "ENSG00000125730"; transcript_id "hsCircRNA-294"; gene_name "C3"; gene_biotype "protein_coding"; transcript_biotype "circRNA"; oId "lv:circC3-1620-001"; tissue "lv";
19	ncSplice	exon	6702127	6702212	.	-	.	gene_id "ENSG00000125730"; transcript_id "hsCircRNA-294"; exon_number "1" gene_name "C3"; gene_biotype "protein_coding"; oId "lv:circC3-1620-001"; tissue "lv";
19	ncSplice	exon	6702471	6702579	.	-	.	gene_id "ENSG00000125730"; transcript_id "hsCircRNA-294"; exon_number "2" gene_name "C3"; gene_biotype "protein_coding"; oId "lv:circC3-1620-001"; tissue "lv";
1	ncSplice	gene	97515726	97549744	.	-	.	gene_id "ENSG00000188641"; gene_name "DPYD"; gene_source "ncSplice"; gene_biotype "protein_coding";
1	ncSplice	transcript	97515726	97549744	.	-	.	gene_id "ENSG00000188641"; transcript_id "hsCircRNA-295"; gene_name "DPYD"; gene_biotype "protein_coding"; transcript_biotype "circRNA"; oId "lv:circDPYD-1621-001"; tissue "lv";
1	ncSplice	exon	97515726	97515941	.	-	.	gene_id "ENSG00000188641"; transcript_id "hsCircRNA-295"; exon_number "1" gene_name "DPYD"; gene_biotype "protein_coding"; oId "lv:circDPYD-1621-001"; tissue "lv";
1	ncSplice	exon	97549560	97549744	.	-	.	gene_id "ENSG00000188641"; transcript_id "hsCircRNA-295"; exon_number "2" gene_name "DPYD"; gene_biotype "protein_coding"; oId "lv:circDPYD-1621-001"; tissue "lv";
1	ncSplice	gene	97679095	97699547	.	-	.	gene_id "ENSG00000188641"; gene_name "DPYD"; gene_source "ncSplice"; gene_biotype "protein_coding";
1	ncSplice	transcript	97679095	97699547	.	-	.	gene_id "ENSG00000188641"; transcript_id "hsCircRNA-296"; gene_name "DPYD"; gene_biotype "protein_coding"; transcript_biotype "circRNA"; oId "lv:circDPYD-1625-001"; tissue "lv";
1	ncSplice	exon	97679095	97679182	.	-	.	gene_id "ENSG00000188641"; transcript_id "hsCircRNA-296"; exon_number "1" gene_name "DPYD"; gene_biotype "protein_coding"; oId "lv:circDPYD-1625-001"; tissue "lv";
1	ncSplice	exon	97691717	97691798	.	-	.	gene_id "ENSG00000188641"; transcript_id "hsCircRNA-296"; exon_number "2" gene_name "DPYD"; gene_biotype "protein_coding"; oId "lv:circDPYD-1625-001"; tissue "lv";
1	ncSplice	exon	97699351	97699547	.	-	.	gene_id "ENSG00000188641"; transcript_id "hsCircRNA-296"; exon_number "3" gene_name "DPYD"; gene_biotype "protein_coding"; oId "lv:circDPYD-1625-001"; tissue "lv";
19	ncSplice	gene	8455405	8463686	.	+	.	gene_id "ENSG00000099783"; gene_name "HNRNPM"; gene_source "ncSplice"; gene_biotype "protein_coding";
19	ncSplice	transcript	8455405	8463686	.	+	.	gene_id "ENSG00000099783"; transcript_id "hsCircRNA-297"; gene_name "HNRNPM"; gene_biotype "protein_coding"; transcript_biotype "circRNA"; oId "lv:circHNRNPM-1627-001|ce:circHNRNPM-7238-001|ts:circHNRNPM-7151-001"; tissue "lv|ce|ts";
19	ncSplice	exon	8455405	8455574	.	+	.	gene_id "ENSG00000099783"; transcript_id "hsCircRNA-297"; exon_number "1" gene_name "HNRNPM"; gene_biotype "protein_coding"; oId "lv:circHNRNPM-1627-001|ce:circHNRNPM-7238-001|ts:circHNRNPM-7151-001"; tissue "lv|ce|ts";
19	ncSplice	exon	8462529	8462581	.	+	.	gene_id "ENSG00000099783"; transcript_id "hsCircRNA-297"; exon_number "2" gene_name "HNRNPM"; gene_biotype "protein_coding"; oId "lv:circHNRNPM-1627-001|ce:circHNRNPM-7238-001|ts:circHNRNPM-7151-001"; tissue "lv|ce|ts";
19	ncSplice	exon	8463497	8463504	.	+	.	gene_id "ENSG00000099783"; transcript_id "hsCircRNA-297"; exon_number "3" gene_name "HNRNPM"; gene_biotype "protein_coding"; oId "lv:circHNRNPM-1627-001|ce:circHNRNPM-7238-001|ts:circHNRNPM-7151-001"; tissue "lv|ce|ts";
19	ncSplice	exon	8463593	8463686	.	+	.	gene_id "ENSG00000099783"; transcript_id "hsCircRNA-297"; exon_number "4" gene_name "HNRNPM"; gene_biotype "protein_coding"; oId "lv:circHNRNPM-1627-001|ce:circHNRNPM-7238-001|ts:circHNRNPM-7151-001"; tissue "lv|ce|ts";
20	ncSplice	gene	32366384	32369123	.	+	.	gene_id "ENSG00000171456"; gene_name "ASXL1"; gene_source "ncSplice"; gene_biotype "protein_coding";
20	ncSplice	transcript	32366384	32369123	.	+	.	gene_id "ENSG00000171456"; transcript_id "hsCircRNA-298"; gene_name "ASXL1"; gene_biotype "protein_coding"; transcript_biotype "circRNA"; oId "lv:circASXL1-1643-001"; tissue "lv";
20	ncSplice	exon	32366384	32366466	.	+	.	gene_id "ENSG00000171456"; transcript_id "hsCircRNA-298"; exon_number "1" gene_name "ASXL1"; gene_biotype "protein_coding"; oId "lv:circASXL1-1643-001"; tissue "lv";
20	ncSplice	exon	32369015	32369123	.	+	.	gene_id "ENSG00000171456"; transcript_id "hsCircRNA-298"; exon_number "2" gene_name "ASXL1"; gene_biotype "protein_coding"; oId "lv:circASXL1-1643-001"; tissue "lv";
20	ncSplice	gene	32366384	32371874	.	+	.	gene_id "ENSG00000171456"; gene_name "ASXL1"; gene_source "ncSplice"; gene_biotype "protein_coding";
20	ncSplice	transcript	32366384	32371874	.	+	.	gene_id "ENSG00000171456"; transcript_id "hsCircRNA-299"; gene_name "ASXL1"; gene_biotype "protein_coding"; transcript_biotype "circRNA"; oId "lv:circASXL1-1644-001"; tissue "lv";
20	ncSplice	exon	32366384	32366466	.	+	.	gene_id "ENSG00000171456"; transcript_id "hsCircRNA-299"; exon_number "1" gene_name "ASXL1"; gene_biotype "protein_coding"; oId "lv:circASXL1-1644-001"; tissue "lv";
20	ncSplice	exon	32367727	32369123	.	+	.	gene_id "ENSG00000171456"; transcript_id "hsCircRNA-299"; exon_number "2" gene_name "ASXL1"; gene_biotype "protein_coding"; oId "lv:circASXL1-1644-001"; tissue "lv";
20	ncSplice	exon	32371778	32371874	.	+	.	gene_id "ENSG00000171456"; transcript_id "hsCircRNA-299"; exon_number "3" gene_name "ASXL1"; gene_biotype "protein_coding"; oId "lv:circASXL1-1644-001"; tissue "lv";
20	ncSplice	gene	33619517	33623296	.	+	.	gene_id "ENSG00000078699"; gene_name "CBFA2T2"; gene_source "ncSplice"; gene_biotype "protein_coding";
20	ncSplice	transcript	33619517	33623296	.	+	.	gene_id "ENSG00000078699"; transcript_id "hsCircRNA-300"; gene_name "CBFA2T2"; gene_biotype "protein_coding"; transcript_biotype "circRNA"; oId "lv:circCBFA2T2-1647-001|ce:circCBFA2T2-7332-001|ts:circCBFA2T2-7253-001"; tissue "lv|ce|ts";
20	ncSplice	exon	33619517	33619606	.	+	.	gene_id "ENSG00000078699"; transcript_id "hsCircRNA-300"; exon_number "1" gene_name "CBFA2T2"; gene_biotype "protein_coding"; oId "lv:circCBFA2T2-1647-001|ce:circCBFA2T2-7332-001|ts:circCBFA2T2-7253-001"; tissue "lv|ce|ts";
20	ncSplice	exon	33623115	33623296	.	+	.	gene_id "ENSG00000078699"; transcript_id "hsCircRNA-300"; exon_number "2" gene_name "CBFA2T2"; gene_biotype "protein_coding"; oId "lv:circCBFA2T2-1647-001|ce:circCBFA2T2-7332-001|ts:circCBFA2T2-7253-001"; tissue "lv|ce|ts";
20	ncSplice	gene	34727259	34736758	.	-	.	gene_id "ENSG00000198646"; gene_name "NCOA6"; gene_source "ncSplice"; gene_biotype "protein_coding";
20	ncSplice	transcript	34727259	34736758	.	-	.	gene_id "ENSG00000198646"; transcript_id "hsCircRNA-301"; gene_name "NCOA6"; gene_biotype "protein_coding"; transcript_biotype "circRNA"; oId "lv:circNCOA6-1652-001|ce:circNCOA6-7360-001"; tissue "lv|ce";
20	ncSplice	exon	34727259	34727407	.	-	.	gene_id "ENSG00000198646"; transcript_id "hsCircRNA-301"; exon_number "1" gene_name "NCOA6"; gene_biotype "protein_coding"; oId "lv:circNCOA6-1652-001|ce:circNCOA6-7360-001"; tissue "lv|ce";
20	ncSplice	exon	34732559	34732595	.	-	.	gene_id "ENSG00000198646"; transcript_id "hsCircRNA-301"; exon_number "2" gene_name "NCOA6"; gene_biotype "protein_coding"; oId "lv:circNCOA6-1652-001|ce:circNCOA6-7360-001"; tissue "lv|ce";
20	ncSplice	exon	34736690	34736758	.	-	.	gene_id "ENSG00000198646"; transcript_id "hsCircRNA-301"; exon_number "3" gene_name "NCOA6"; gene_biotype "protein_coding"; oId "lv:circNCOA6-1652-001|ce:circNCOA6-7360-001"; tissue "lv|ce";
20	ncSplice	gene	35714185	35725155	.	-	.	gene_id "ENSG00000131051"; gene_name "RBM39"; gene_source "ncSplice"; gene_biotype "protein_coding";
20	ncSplice	transcript	35714185	35725155	.	-	.	gene_id "ENSG00000131051"; transcript_id "hsCircRNA-302"; gene_name "RBM39"; gene_biotype "protein_coding"; transcript_biotype "circRNA"; oId "lv:circRBM39-1656-001|ce:circRBM39-7377-004|ts:circRBM39-7289-002"; tissue "lv|ce|ts";
20	ncSplice	exon	35714185	35714389	.	-	.	gene_id "ENSG00000131051"; transcript_id "hsCircRNA-302"; exon_number "1" gene_name "RBM39"; gene_biotype "protein_coding"; oId "lv:circRBM39-1656-001|ce:circRBM39-7377-004|ts:circRBM39-7289-002"; tissue "lv|ce|ts";
20	ncSplice	exon	35716740	35716805	.	-	.	gene_id "ENSG00000131051"; transcript_id "hsCircRNA-302"; exon_number "2" gene_name "RBM39"; gene_biotype "protein_coding"; oId "lv:circRBM39-1656-001|ce:circRBM39-7377-004|ts:circRBM39-7289-002"; tissue "lv|ce|ts";
20	ncSplice	exon	35721740	35721877	.	-	.	gene_id "ENSG00000131051"; transcript_id "hsCircRNA-302"; exon_number "3" gene_name "RBM39"; gene_biotype "protein_coding"; oId "lv:circRBM39-1656-001|ce:circRBM39-7377-004|ts:circRBM39-7289-002"; tissue "lv|ce|ts";
20	ncSplice	exon	35724570	35724722	.	-	.	gene_id "ENSG00000131051"; transcript_id "hsCircRNA-302"; exon_number "4" gene_name "RBM39"; gene_biotype "protein_coding"; oId "lv:circRBM39-1656-001|ce:circRBM39-7377-004|ts:circRBM39-7289-002"; tissue "lv|ce|ts";
20	ncSplice	exon	35725038	35725155	.	-	.	gene_id "ENSG00000131051"; transcript_id "hsCircRNA-302"; exon_number "5" gene_name "RBM39"; gene_biotype "protein_coding"; oId "lv:circRBM39-1656-001|ce:circRBM39-7377-004|ts:circRBM39-7289-002"; tissue "lv|ce|ts";
20	ncSplice	gene	35716740	35725155	.	-	.	gene_id "ENSG00000131051"; gene_name "RBM39"; gene_source "ncSplice"; gene_biotype "protein_coding";
20	ncSplice	transcript	35716740	35725155	.	-	.	gene_id "ENSG00000131051"; transcript_id "hsCircRNA-303"; gene_name "RBM39"; gene_biotype "protein_coding"; transcript_biotype "circRNA"; oId "lv:circRBM39-1658-001|ce:circRBM39-7379-004|ts:circRBM39-7291-002"; tissue "lv|ce|ts";
20	ncSplice	exon	35716740	35716805	.	-	.	gene_id "ENSG00000131051"; transcript_id "hsCircRNA-303"; exon_number "1" gene_name "RBM39"; gene_biotype "protein_coding"; oId "lv:circRBM39-1658-001|ce:circRBM39-7379-004|ts:circRBM39-7291-002"; tissue "lv|ce|ts";
20	ncSplice	exon	35721740	35721877	.	-	.	gene_id "ENSG00000131051"; transcript_id "hsCircRNA-303"; exon_number "2" gene_name "RBM39"; gene_biotype "protein_coding"; oId "lv:circRBM39-1658-001|ce:circRBM39-7379-004|ts:circRBM39-7291-002"; tissue "lv|ce|ts";
20	ncSplice	exon	35724570	35724722	.	-	.	gene_id "ENSG00000131051"; transcript_id "hsCircRNA-303"; exon_number "3" gene_name "RBM39"; gene_biotype "protein_coding"; oId "lv:circRBM39-1658-001|ce:circRBM39-7379-004|ts:circRBM39-7291-002"; tissue "lv|ce|ts";
20	ncSplice	exon	35725038	35725155	.	-	.	gene_id "ENSG00000131051"; transcript_id "hsCircRNA-303"; exon_number "4" gene_name "RBM39"; gene_biotype "protein_coding"; oId "lv:circRBM39-1658-001|ce:circRBM39-7379-004|ts:circRBM39-7291-002"; tissue "lv|ce|ts";
20	ncSplice	gene	35729312	35732135	.	-	.	gene_id "ENSG00000131051"; gene_name "RBM39"; gene_source "ncSplice"; gene_biotype "protein_coding";
20	ncSplice	transcript	35729312	35732135	.	-	.	gene_id "ENSG00000131051"; transcript_id "hsCircRNA-304"; gene_name "RBM39"; gene_biotype "protein_coding"; transcript_biotype "circRNA"; oId "lv:circRBM39-1662-001|ce:circRBM39-7386-001|ts:circRBM39-7296-001"; tissue "lv|ce|ts";
20	ncSplice	exon	35729312	35729365	.	-	.	gene_id "ENSG00000131051"; transcript_id "hsCircRNA-304"; exon_number "1" gene_name "RBM39"; gene_biotype "protein_coding"; oId "lv:circRBM39-1662-001|ce:circRBM39-7386-001|ts:circRBM39-7296-001"; tissue "lv|ce|ts";
20	ncSplice	exon	35729462	35729527	.	-	.	gene_id "ENSG00000131051"; transcript_id "hsCircRNA-304"; exon_number "2" gene_name "RBM39"; gene_biotype "protein_coding"; oId "lv:circRBM39-1662-001|ce:circRBM39-7386-001|ts:circRBM39-7296-001"; tissue "lv|ce|ts";
20	ncSplice	exon	35731941	35732135	.	-	.	gene_id "ENSG00000131051"; transcript_id "hsCircRNA-304"; exon_number "3" gene_name "RBM39"; gene_biotype "protein_coding"; oId "lv:circRBM39-1662-001|ce:circRBM39-7386-001|ts:circRBM39-7296-001"; tissue "lv|ce|ts";
20	ncSplice	gene	38057532	38066256	.	+	.	gene_id "ENSG00000101413"; gene_name "RPRD1B"; gene_source "ncSplice"; gene_biotype "protein_coding";
20	ncSplice	transcript	38057532	38066256	.	+	.	gene_id "ENSG00000101413"; transcript_id "hsCircRNA-305"; gene_name "RPRD1B"; gene_biotype "protein_coding"; transcript_biotype "circRNA"; oId "lv:circRPRD1B-1666-001|ce:circRPRD1B-7413-001|ts:circRPRD1B-7335-003"; tissue "lv|ce|ts";
20	ncSplice	exon	38057532	38057644	.	+	.	gene_id "ENSG00000101413"; transcript_id "hsCircRNA-305"; exon_number "1" gene_name "RPRD1B"; gene_biotype "protein_coding"; oId "lv:circRPRD1B-1666-001|ce:circRPRD1B-7413-001|ts:circRPRD1B-7335-003"; tissue "lv|ce|ts";
20	ncSplice	exon	38059394	38059520	.	+	.	gene_id "ENSG00000101413"; transcript_id "hsCircRNA-305"; exon_number "2" gene_name "RPRD1B"; gene_biotype "protein_coding"; oId "lv:circRPRD1B-1666-001|ce:circRPRD1B-7413-001|ts:circRPRD1B-7335-003"; tissue "lv|ce|ts";
20	ncSplice	exon	38066081	38066256	.	+	.	gene_id "ENSG00000101413"; transcript_id "hsCircRNA-305"; exon_number "3" gene_name "RPRD1B"; gene_biotype "protein_coding"; oId "lv:circRPRD1B-1666-001|ce:circRPRD1B-7413-001|ts:circRPRD1B-7335-003"; tissue "lv|ce|ts";
20	ncSplice	gene	41092472	41101353	.	+	.	gene_id "ENSG00000198900"; gene_name "TOP1"; gene_source "ncSplice"; gene_biotype "protein_coding";
20	ncSplice	transcript	41092472	41101353	.	+	.	gene_id "ENSG00000198900"; transcript_id "hsCircRNA-306"; gene_name "TOP1"; gene_biotype "protein_coding"; transcript_biotype "circRNA"; oId "lv:circTOP1-1668-001"; tissue "lv";
20	ncSplice	exon	41092472	41092587	.	+	.	gene_id "ENSG00000198900"; transcript_id "hsCircRNA-306"; exon_number "1" gene_name "TOP1"; gene_biotype "protein_coding"; oId "lv:circTOP1-1668-001"; tissue "lv";
20	ncSplice	exon	41097220	41100243	.	+	.	gene_id "ENSG00000198900"; transcript_id "hsCircRNA-306"; exon_number "2" gene_name "TOP1"; gene_biotype "protein_coding"; oId "lv:circTOP1-1668-001"; tissue "lv";
20	ncSplice	exon	41101209	41101353	.	+	.	gene_id "ENSG00000198900"; transcript_id "hsCircRNA-306"; exon_number "3" gene_name "TOP1"; gene_biotype "protein_coding"; oId "lv:circTOP1-1668-001"; tissue "lv";
20	ncSplice	gene	41533050	41551360	.	-	.	gene_id "ENSG00000124177"; gene_name "CHD6"; gene_source "ncSplice"; gene_biotype "protein_coding";
20	ncSplice	transcript	41533050	41551360	.	-	.	gene_id "ENSG00000124177"; transcript_id "hsCircRNA-307"; gene_name "CHD6"; gene_biotype "protein_coding"; transcript_biotype "circRNA"; oId "lv:circCHD6-1671-001|ce:circCHD6-7433-006"; tissue "lv|ce";
20	ncSplice	exon	41533050	41533570	.	-	.	gene_id "ENSG00000124177"; transcript_id "hsCircRNA-307"; exon_number "1" gene_name "CHD6"; gene_biotype "protein_coding"; oId "lv:circCHD6-1671-001|ce:circCHD6-7433-006"; tissue "lv|ce";
20	ncSplice	exon	41551305	41551360	.	-	.	gene_id "ENSG00000124177"; transcript_id "hsCircRNA-307"; exon_number "2" gene_name "CHD6"; gene_biotype "protein_coding"; oId "lv:circCHD6-1671-001|ce:circCHD6-7433-006"; tissue "lv|ce";
20	ncSplice	gene	58438945	58441083	.	+	.	gene_id "ENSG00000124164"; gene_name "VAPB"; gene_source "ncSplice"; gene_biotype "protein_coding";
20	ncSplice	transcript	58438945	58441083	.	+	.	gene_id "ENSG00000124164"; transcript_id "hsCircRNA-308"; gene_name "VAPB"; gene_biotype "protein_coding"; transcript_biotype "circRNA"; oId "lv:circVAPB-1682-001|ce:circVAPB-7530-002|ts:circVAPB-7436-002"; tissue "lv|ce|ts";
20	ncSplice	exon	58438945	58439025	.	+	.	gene_id "ENSG00000124164"; transcript_id "hsCircRNA-308"; exon_number "1" gene_name "VAPB"; gene_biotype "protein_coding"; oId "lv:circVAPB-1682-001|ce:circVAPB-7530-002|ts:circVAPB-7436-002"; tissue "lv|ce|ts";
20	ncSplice	exon	58440907	58441083	.	+	.	gene_id "ENSG00000124164"; transcript_id "hsCircRNA-308"; exon_number "2" gene_name "VAPB"; gene_biotype "protein_coding"; oId "lv:circVAPB-1682-001|ce:circVAPB-7530-002|ts:circVAPB-7436-002"; tissue "lv|ce|ts";
20	ncSplice	gene	62139075	62140944	.	-	.	gene_id "ENSG00000101182"; gene_name "PSMA7"; gene_source "ncSplice"; gene_biotype "protein_coding";
20	ncSplice	transcript	62139075	62140944	.	-	.	gene_id "ENSG00000101182"; transcript_id "hsCircRNA-309"; gene_name "PSMA7"; gene_biotype "protein_coding"; transcript_biotype "circRNA"; oId "lv:circPSMA7-1684-002|ce:circPSMA7-7542-003|ts:circPSMA7-7453-002"; tissue "lv|ce|ts";
20	ncSplice	exon	62139075	62139197	.	-	.	gene_id "ENSG00000101182"; transcript_id "hsCircRNA-309"; exon_number "1" gene_name "PSMA7"; gene_biotype "protein_coding"; oId "lv:circPSMA7-1684-002|ce:circPSMA7-7542-003|ts:circPSMA7-7453-002"; tissue "lv|ce|ts";
20	ncSplice	exon	62139781	62139905	.	-	.	gene_id "ENSG00000101182"; transcript_id "hsCircRNA-309"; exon_number "2" gene_name "PSMA7"; gene_biotype "protein_coding"; oId "lv:circPSMA7-1684-002|ce:circPSMA7-7542-003|ts:circPSMA7-7453-002"; tissue "lv|ce|ts";
20	ncSplice	exon	62140818	62140944	.	-	.	gene_id "ENSG00000101182"; transcript_id "hsCircRNA-309"; exon_number "3" gene_name "PSMA7"; gene_biotype "protein_coding"; oId "lv:circPSMA7-1684-002|ce:circPSMA7-7542-003|ts:circPSMA7-7453-002"; tissue "lv|ce|ts";
21	ncSplice	gene	15014344	15043574	.	-	.	gene_id "ENSG00000180530"; gene_name "NRIP1"; gene_source "ncSplice"; gene_biotype "protein_coding";
21	ncSplice	transcript	15014344	15043574	.	-	.	gene_id "ENSG00000180530"; transcript_id "hsCircRNA-310"; gene_name "NRIP1"; gene_biotype "protein_coding"; transcript_biotype "circRNA"; oId "lv:circNRIP1-1701-001|ce:circNRIP1-7618-004|ts:circNRIP1-7534-003"; tissue "lv|ce|ts";
21	ncSplice	exon	15014344	15014466	.	-	.	gene_id "ENSG00000180530"; transcript_id "hsCircRNA-310"; exon_number "1" gene_name "NRIP1"; gene_biotype "protein_coding"; oId "lv:circNRIP1-1701-001|ce:circNRIP1-7618-004|ts:circNRIP1-7534-003"; tissue "lv|ce|ts";
21	ncSplice	exon	15043495	15043574	.	-	.	gene_id "ENSG00000180530"; transcript_id "hsCircRNA-310"; exon_number "2" gene_name "NRIP1"; gene_biotype "protein_coding"; oId "lv:circNRIP1-1701-001|ce:circNRIP1-7618-004|ts:circNRIP1-7534-003"; tissue "lv|ce|ts";
21	ncSplice	gene	15762891	15766141	.	+	.	gene_id "ENSG00000155313"; gene_name "USP25"; gene_source "ncSplice"; gene_biotype "protein_coding";
21	ncSplice	transcript	15762891	15766141	.	+	.	gene_id "ENSG00000155313"; transcript_id "hsCircRNA-311"; gene_name "USP25"; gene_biotype "protein_coding"; transcript_biotype "circRNA"; oId "lv:circUSP25-1702-001|ce:circUSP25-7619-005|ts:circUSP25-7538-006"; tissue "lv|ce|ts";
21	ncSplice	exon	15762891	15762968	.	+	.	gene_id "ENSG00000155313"; transcript_id "hsCircRNA-311"; exon_number "1" gene_name "USP25"; gene_biotype "protein_coding"; oId "lv:circUSP25-1702-001|ce:circUSP25-7619-005|ts:circUSP25-7538-006"; tissue "lv|ce|ts";
21	ncSplice	exon	15765997	15766141	.	+	.	gene_id "ENSG00000155313"; transcript_id "hsCircRNA-311"; exon_number "2" gene_name "USP25"; gene_biotype "protein_coding"; oId "lv:circUSP25-1702-001|ce:circUSP25-7619-005|ts:circUSP25-7538-006"; tissue "lv|ce|ts";
2	ncSplice	gene	120073178	120078581	.	+	.	gene_id "ENSG00000115109"; gene_name "EPB41L5"; gene_source "ncSplice"; gene_biotype "protein_coding";
2	ncSplice	transcript	120073178	120078581	.	+	.	gene_id "ENSG00000115109"; transcript_id "hsCircRNA-312"; gene_name "EPB41L5"; gene_biotype "protein_coding"; transcript_biotype "circRNA"; oId "lv:circEPB41L5-1710-001|ce:circEPB41L5-7661-001|ts:circEPB41L5-7566-001"; tissue "lv|ce|ts";
2	ncSplice	exon	120073178	120073220	.	+	.	gene_id "ENSG00000115109"; transcript_id "hsCircRNA-312"; exon_number "1" gene_name "EPB41L5"; gene_biotype "protein_coding"; oId "lv:circEPB41L5-1710-001|ce:circEPB41L5-7661-001|ts:circEPB41L5-7566-001"; tissue "lv|ce|ts";
2	ncSplice	exon	120074100	120074178	.	+	.	gene_id "ENSG00000115109"; transcript_id "hsCircRNA-312"; exon_number "2" gene_name "EPB41L5"; gene_biotype "protein_coding"; oId "lv:circEPB41L5-1710-001|ce:circEPB41L5-7661-001|ts:circEPB41L5-7566-001"; tissue "lv|ce|ts";
2	ncSplice	exon	120075476	120075520	.	+	.	gene_id "ENSG00000115109"; transcript_id "hsCircRNA-312"; exon_number "3" gene_name "EPB41L5"; gene_biotype "protein_coding"; oId "lv:circEPB41L5-1710-001|ce:circEPB41L5-7661-001|ts:circEPB41L5-7566-001"; tissue "lv|ce|ts";
2	ncSplice	exon	120075701	120075753	.	+	.	gene_id "ENSG00000115109"; transcript_id "hsCircRNA-312"; exon_number "4" gene_name "EPB41L5"; gene_biotype "protein_coding"; oId "lv:circEPB41L5-1710-001|ce:circEPB41L5-7661-001|ts:circEPB41L5-7566-001"; tissue "lv|ce|ts";
2	ncSplice	exon	120076971	120077091	.	+	.	gene_id "ENSG00000115109"; transcript_id "hsCircRNA-312"; exon_number "5" gene_name "EPB41L5"; gene_biotype "protein_coding"; oId "lv:circEPB41L5-1710-001|ce:circEPB41L5-7661-001|ts:circEPB41L5-7566-001"; tissue "lv|ce|ts";
2	ncSplice	exon	120077229	120077316	.	+	.	gene_id "ENSG00000115109"; transcript_id "hsCircRNA-312"; exon_number "6" gene_name "EPB41L5"; gene_biotype "protein_coding"; oId "lv:circEPB41L5-1710-001|ce:circEPB41L5-7661-001|ts:circEPB41L5-7566-001"; tissue "lv|ce|ts";
2	ncSplice	exon	120078493	120078581	.	+	.	gene_id "ENSG00000115109"; transcript_id "hsCircRNA-312"; exon_number "7" gene_name "EPB41L5"; gene_biotype "protein_coding"; oId "lv:circEPB41L5-1710-001|ce:circEPB41L5-7661-001|ts:circEPB41L5-7566-001"; tissue "lv|ce|ts";
2	ncSplice	gene	120127688	120146289	.	+	.	gene_id "ENSG00000115109"; gene_name "EPB41L5"; gene_source "ncSplice"; gene_biotype "protein_coding";
2	ncSplice	transcript	120127688	120146289	.	+	.	gene_id "ENSG00000115109"; transcript_id "hsCircRNA-313"; gene_name "EPB41L5"; gene_biotype "protein_coding"; transcript_biotype "circRNA"; oId "lv:circEPB41L5-1711-001|ce:circEPB41L5-7664-003|ts:circEPB41L5-7570-001"; tissue "lv|ce|ts";
2	ncSplice	exon	120127688	120127851	.	+	.	gene_id "ENSG00000115109"; transcript_id "hsCircRNA-313"; exon_number "1" gene_name "EPB41L5"; gene_biotype "protein_coding"; oId "lv:circEPB41L5-1711-001|ce:circEPB41L5-7664-003|ts:circEPB41L5-7570-001"; tissue "lv|ce|ts";
2	ncSplice	exon	120131618	120131715	.	+	.	gene_id "ENSG00000115109"; transcript_id "hsCircRNA-313"; exon_number "2" gene_name "EPB41L5"; gene_biotype "protein_coding"; oId "lv:circEPB41L5-1711-001|ce:circEPB41L5-7664-003|ts:circEPB41L5-7570-001"; tissue "lv|ce|ts";
2	ncSplice	exon	120143003	120143131	.	+	.	gene_id "ENSG00000115109"; transcript_id "hsCircRNA-313"; exon_number "3" gene_name "EPB41L5"; gene_biotype "protein_coding"; oId "lv:circEPB41L5-1711-001|ce:circEPB41L5-7664-003|ts:circEPB41L5-7570-001"; tissue "lv|ce|ts";
2	ncSplice	exon	120146225	120146289	.	+	.	gene_id "ENSG00000115109"; transcript_id "hsCircRNA-313"; exon_number "4" gene_name "EPB41L5"; gene_biotype "protein_coding"; oId "lv:circEPB41L5-1711-001|ce:circEPB41L5-7664-003|ts:circEPB41L5-7570-001"; tissue "lv|ce|ts";
2	ncSplice	gene	120127688	120175000	.	+	.	gene_id "ENSG00000115109"; gene_name "EPB41L5"; gene_source "ncSplice"; gene_biotype "protein_coding";
2	ncSplice	transcript	120127688	120175000	.	+	.	gene_id "ENSG00000115109"; transcript_id "hsCircRNA-314"; gene_name "EPB41L5"; gene_biotype "protein_coding"; transcript_biotype "circRNA"; oId "lv:circEPB41L5-1712-003"; tissue "lv";
2	ncSplice	exon	120127688	120127851	.	+	.	gene_id "ENSG00000115109"; transcript_id "hsCircRNA-314"; exon_number "1" gene_name "EPB41L5"; gene_biotype "protein_coding"; oId "lv:circEPB41L5-1712-003"; tissue "lv";
2	ncSplice	exon	120131618	120131715	.	+	.	gene_id "ENSG00000115109"; transcript_id "hsCircRNA-314"; exon_number "2" gene_name "EPB41L5"; gene_biotype "protein_coding"; oId "lv:circEPB41L5-1712-003"; tissue "lv";
2	ncSplice	exon	120143003	120143131	.	+	.	gene_id "ENSG00000115109"; transcript_id "hsCircRNA-314"; exon_number "3" gene_name "EPB41L5"; gene_biotype "protein_coding"; oId "lv:circEPB41L5-1712-003"; tissue "lv";
2	ncSplice	exon	120146225	120146289	.	+	.	gene_id "ENSG00000115109"; transcript_id "hsCircRNA-314"; exon_number "4" gene_name "EPB41L5"; gene_biotype "protein_coding"; oId "lv:circEPB41L5-1712-003"; tissue "lv";
2	ncSplice	exon	120160881	120160974	.	+	.	gene_id "ENSG00000115109"; transcript_id "hsCircRNA-314"; exon_number "5" gene_name "EPB41L5"; gene_biotype "protein_coding"; oId "lv:circEPB41L5-1712-003"; tissue "lv";
2	ncSplice	exon	120164836	120164910	.	+	.	gene_id "ENSG00000115109"; transcript_id "hsCircRNA-314"; exon_number "6" gene_name "EPB41L5"; gene_biotype "protein_coding"; oId "lv:circEPB41L5-1712-003"; tissue "lv";
2	ncSplice	exon	120167466	120167507	.	+	.	gene_id "ENSG00000115109"; transcript_id "hsCircRNA-314"; exon_number "7" gene_name "EPB41L5"; gene_biotype "protein_coding"; oId "lv:circEPB41L5-1712-003"; tissue "lv";
2	ncSplice	exon	120174841	120175000	.	+	.	gene_id "ENSG00000115109"; transcript_id "hsCircRNA-314"; exon_number "8" gene_name "EPB41L5"; gene_biotype "protein_coding"; oId "lv:circEPB41L5-1712-003"; tissue "lv";
2	ncSplice	gene	120127688	120175004	.	+	.	gene_id "ENSG00000115109"; gene_name "EPB41L5"; gene_source "ncSplice"; gene_biotype "protein_coding";
2	ncSplice	transcript	120127688	120175004	.	+	.	gene_id "ENSG00000115109"; transcript_id "hsCircRNA-315"; gene_name "EPB41L5"; gene_biotype "protein_coding"; transcript_biotype "circRNA"; oId "lv:circEPB41L5-1713-003|ts:circEPB41L5-7573-008"; tissue "lv|ts";
2	ncSplice	exon	120127688	120127851	.	+	.	gene_id "ENSG00000115109"; transcript_id "hsCircRNA-315"; exon_number "1" gene_name "EPB41L5"; gene_biotype "protein_coding"; oId "lv:circEPB41L5-1713-003|ts:circEPB41L5-7573-008"; tissue "lv|ts";
2	ncSplice	exon	120131618	120131715	.	+	.	gene_id "ENSG00000115109"; transcript_id "hsCircRNA-315"; exon_number "2" gene_name "EPB41L5"; gene_biotype "protein_coding"; oId "lv:circEPB41L5-1713-003|ts:circEPB41L5-7573-008"; tissue "lv|ts";
2	ncSplice	exon	120143003	120143131	.	+	.	gene_id "ENSG00000115109"; transcript_id "hsCircRNA-315"; exon_number "3" gene_name "EPB41L5"; gene_biotype "protein_coding"; oId "lv:circEPB41L5-1713-003|ts:circEPB41L5-7573-008"; tissue "lv|ts";
2	ncSplice	exon	120146225	120146289	.	+	.	gene_id "ENSG00000115109"; transcript_id "hsCircRNA-315"; exon_number "4" gene_name "EPB41L5"; gene_biotype "protein_coding"; oId "lv:circEPB41L5-1713-003|ts:circEPB41L5-7573-008"; tissue "lv|ts";
2	ncSplice	exon	120160881	120160974	.	+	.	gene_id "ENSG00000115109"; transcript_id "hsCircRNA-315"; exon_number "5" gene_name "EPB41L5"; gene_biotype "protein_coding"; oId "lv:circEPB41L5-1713-003|ts:circEPB41L5-7573-008"; tissue "lv|ts";
2	ncSplice	exon	120164836	120164910	.	+	.	gene_id "ENSG00000115109"; transcript_id "hsCircRNA-315"; exon_number "6" gene_name "EPB41L5"; gene_biotype "protein_coding"; oId "lv:circEPB41L5-1713-003|ts:circEPB41L5-7573-008"; tissue "lv|ts";
2	ncSplice	exon	120167466	120167507	.	+	.	gene_id "ENSG00000115109"; transcript_id "hsCircRNA-315"; exon_number "7" gene_name "EPB41L5"; gene_biotype "protein_coding"; oId "lv:circEPB41L5-1713-003|ts:circEPB41L5-7573-008"; tissue "lv|ts";
2	ncSplice	exon	120174841	120175004	.	+	.	gene_id "ENSG00000115109"; transcript_id "hsCircRNA-315"; exon_number "8" gene_name "EPB41L5"; gene_biotype "protein_coding"; oId "lv:circEPB41L5-1713-003|ts:circEPB41L5-7573-008"; tissue "lv|ts";
2	ncSplice	gene	135675332	135680324	.	+	.	gene_id "ENSG00000048991"; gene_name "R3HDM1"; gene_source "ncSplice"; gene_biotype "protein_coding";
2	ncSplice	transcript	135675332	135680324	.	+	.	gene_id "ENSG00000048991"; transcript_id "hsCircRNA-316"; gene_name "R3HDM1"; gene_biotype "protein_coding"; transcript_biotype "circRNA"; oId "lv:circR3HDM1-1740-001|ce:circR3HDM1-7815-001|ts:circR3HDM1-7695-001"; tissue "lv|ce|ts";
2	ncSplice	exon	135675332	135675486	.	+	.	gene_id "ENSG00000048991"; transcript_id "hsCircRNA-316"; exon_number "1" gene_name "R3HDM1"; gene_biotype "protein_coding"; oId "lv:circR3HDM1-1740-001|ce:circR3HDM1-7815-001|ts:circR3HDM1-7695-001"; tissue "lv|ce|ts";
2	ncSplice	exon	135680173	135680324	.	+	.	gene_id "ENSG00000048991"; transcript_id "hsCircRNA-316"; exon_number "2" gene_name "R3HDM1"; gene_biotype "protein_coding"; oId "lv:circR3HDM1-1740-001|ce:circR3HDM1-7815-001|ts:circR3HDM1-7695-001"; tissue "lv|ce|ts";
2	ncSplice	gene	135709433	135710231	.	+	.	gene_id "ENSG00000048991"; gene_name "R3HDM1"; gene_source "ncSplice"; gene_biotype "protein_coding";
2	ncSplice	transcript	135709433	135710231	.	+	.	gene_id "ENSG00000048991"; transcript_id "hsCircRNA-317"; gene_name "R3HDM1"; gene_biotype "protein_coding"; transcript_biotype "circRNA"; oId "lv:circR3HDM1-1741-001|ce:circR3HDM1-7818-001|ts:circR3HDM1-7696-001"; tissue "lv|ce|ts";
2	ncSplice	exon	135709433	135709536	.	+	.	gene_id "ENSG00000048991"; transcript_id "hsCircRNA-317"; exon_number "1" gene_name "R3HDM1"; gene_biotype "protein_coding"; oId "lv:circR3HDM1-1741-001|ce:circR3HDM1-7818-001|ts:circR3HDM1-7696-001"; tissue "lv|ce|ts";
2	ncSplice	exon	135710059	135710231	.	+	.	gene_id "ENSG00000048991"; transcript_id "hsCircRNA-317"; exon_number "2" gene_name "R3HDM1"; gene_biotype "protein_coding"; oId "lv:circR3HDM1-1741-001|ce:circR3HDM1-7818-001|ts:circR3HDM1-7696-001"; tissue "lv|ce|ts";
21	ncSplice	gene	36247517	36248568	.	+	.	gene_id "ENSG00000142197"; gene_name "DOPEY2"; gene_source "ncSplice"; gene_biotype "protein_coding";
21	ncSplice	transcript	36247517	36248568	.	+	.	gene_id "ENSG00000142197"; transcript_id "hsCircRNA-318"; gene_name "DOPEY2"; gene_biotype "protein_coding"; transcript_biotype "circRNA"; oId "lv:circDOPEY2-1744-001|ce:circDOPEY2-7824-001|ts:circDOPEY2-7701-001"; tissue "lv|ce|ts";
21	ncSplice	exon	36247517	36247628	.	+	.	gene_id "ENSG00000142197"; transcript_id "hsCircRNA-318"; exon_number "1" gene_name "DOPEY2"; gene_biotype "protein_coding"; oId "lv:circDOPEY2-1744-001|ce:circDOPEY2-7824-001|ts:circDOPEY2-7701-001"; tissue "lv|ce|ts";
21	ncSplice	exon	36248380	36248568	.	+	.	gene_id "ENSG00000142197"; transcript_id "hsCircRNA-318"; exon_number "2" gene_name "DOPEY2"; gene_biotype "protein_coding"; oId "lv:circDOPEY2-1744-001|ce:circDOPEY2-7824-001|ts:circDOPEY2-7701-001"; tissue "lv|ce|ts";
21	ncSplice	gene	36338772	36344707	.	+	.	gene_id "ENSG00000159256"; gene_name "MORC3"; gene_source "ncSplice"; gene_biotype "protein_coding";
21	ncSplice	transcript	36338772	36344707	.	+	.	gene_id "ENSG00000159256"; transcript_id "hsCircRNA-319"; gene_name "MORC3"; gene_biotype "protein_coding"; transcript_biotype "circRNA"; oId "lv:circMORC3-1745-001|ce:circMORC3-7839-001"; tissue "lv|ce";
21	ncSplice	exon	36338772	36338921	.	+	.	gene_id "ENSG00000159256"; transcript_id "hsCircRNA-319"; exon_number "1" gene_name "MORC3"; gene_biotype "protein_coding"; oId "lv:circMORC3-1745-001|ce:circMORC3-7839-001"; tissue "lv|ce";
21	ncSplice	exon	36341399	36341546	.	+	.	gene_id "ENSG00000159256"; transcript_id "hsCircRNA-319"; exon_number "2" gene_name "MORC3"; gene_biotype "protein_coding"; oId "lv:circMORC3-1745-001|ce:circMORC3-7839-001"; tissue "lv|ce";
21	ncSplice	exon	36344579	36344707	.	+	.	gene_id "ENSG00000159256"; transcript_id "hsCircRNA-319"; exon_number "3" gene_name "MORC3"; gene_biotype "protein_coding"; oId "lv:circMORC3-1745-001|ce:circMORC3-7839-001"; tissue "lv|ce";
21	ncSplice	gene	36338775	36344707	.	+	.	gene_id "ENSG00000159256"; gene_name "MORC3"; gene_source "ncSplice"; gene_biotype "protein_coding";
21	ncSplice	transcript	36338775	36344707	.	+	.	gene_id "ENSG00000159256"; transcript_id "hsCircRNA-320"; gene_name "MORC3"; gene_biotype "protein_coding"; transcript_biotype "circRNA"; oId "lv:circMORC3-1746-001|ce:circMORC3-7841-001"; tissue "lv|ce";
21	ncSplice	exon	36338775	36338921	.	+	.	gene_id "ENSG00000159256"; transcript_id "hsCircRNA-320"; exon_number "1" gene_name "MORC3"; gene_biotype "protein_coding"; oId "lv:circMORC3-1746-001|ce:circMORC3-7841-001"; tissue "lv|ce";
21	ncSplice	exon	36341399	36341546	.	+	.	gene_id "ENSG00000159256"; transcript_id "hsCircRNA-320"; exon_number "2" gene_name "MORC3"; gene_biotype "protein_coding"; oId "lv:circMORC3-1746-001|ce:circMORC3-7841-001"; tissue "lv|ce";
21	ncSplice	exon	36344579	36344707	.	+	.	gene_id "ENSG00000159256"; transcript_id "hsCircRNA-320"; exon_number "3" gene_name "MORC3"; gene_biotype "protein_coding"; oId "lv:circMORC3-1746-001|ce:circMORC3-7841-001"; tissue "lv|ce";
21	ncSplice	gene	36338779	36344707	.	+	.	gene_id "ENSG00000159256"; gene_name "MORC3"; gene_source "ncSplice"; gene_biotype "protein_coding";
21	ncSplice	transcript	36338779	36344707	.	+	.	gene_id "ENSG00000159256"; transcript_id "hsCircRNA-321"; gene_name "MORC3"; gene_biotype "protein_coding"; transcript_biotype "circRNA"; oId "lv:circMORC3-1747-001|ce:circMORC3-7842-001"; tissue "lv|ce";
21	ncSplice	exon	36338779	36338921	.	+	.	gene_id "ENSG00000159256"; transcript_id "hsCircRNA-321"; exon_number "1" gene_name "MORC3"; gene_biotype "protein_coding"; oId "lv:circMORC3-1747-001|ce:circMORC3-7842-001"; tissue "lv|ce";
21	ncSplice	exon	36341399	36341546	.	+	.	gene_id "ENSG00000159256"; transcript_id "hsCircRNA-321"; exon_number "2" gene_name "MORC3"; gene_biotype "protein_coding"; oId "lv:circMORC3-1747-001|ce:circMORC3-7842-001"; tissue "lv|ce";
21	ncSplice	exon	36344579	36344707	.	+	.	gene_id "ENSG00000159256"; transcript_id "hsCircRNA-321"; exon_number "3" gene_name "MORC3"; gene_biotype "protein_coding"; oId "lv:circMORC3-1747-001|ce:circMORC3-7842-001"; tissue "lv|ce";
21	ncSplice	gene	37420299	37472880	.	+	.	gene_id "ENSG00000157540"; gene_name "DYRK1A"; gene_source "ncSplice"; gene_biotype "protein_coding";
21	ncSplice	transcript	37420299	37472880	.	+	.	gene_id "ENSG00000157540"; transcript_id "hsCircRNA-322"; gene_name "DYRK1A"; gene_biotype "protein_coding"; transcript_biotype "circRNA"; oId "lv:circDYRK1A-1752-001"; tissue "lv";
21	ncSplice	exon	37420299	37430400	.	+	.	gene_id "ENSG00000157540"; transcript_id "hsCircRNA-322"; exon_number "1" gene_name "DYRK1A"; gene_biotype "protein_coding"; oId "lv:circDYRK1A-1752-001"; tissue "lv";
21	ncSplice	exon	37472684	37472880	.	+	.	gene_id "ENSG00000157540"; transcript_id "hsCircRNA-322"; exon_number "2" gene_name "DYRK1A"; gene_biotype "protein_coding"; oId "lv:circDYRK1A-1752-001"; tissue "lv";
21	ncSplice	gene	39228500	39229436	.	-	.	gene_id "ENSG00000185658"; gene_name "BRWD1"; gene_source "ncSplice"; gene_biotype "protein_coding";
21	ncSplice	transcript	39228500	39229436	.	-	.	gene_id "ENSG00000185658"; transcript_id "hsCircRNA-323"; gene_name "BRWD1"; gene_biotype "protein_coding"; transcript_biotype "circRNA"; oId "lv:circBRWD1-1761-001|ce:circBRWD1-7895-001|ts:circBRWD1-7744-003"; tissue "lv|ce|ts";
21	ncSplice	exon	39228500	39228582	.	-	.	gene_id "ENSG00000185658"; transcript_id "hsCircRNA-323"; exon_number "1" gene_name "BRWD1"; gene_biotype "protein_coding"; oId "lv:circBRWD1-1761-001|ce:circBRWD1-7895-001|ts:circBRWD1-7744-003"; tissue "lv|ce|ts";
21	ncSplice	exon	39229312	39229436	.	-	.	gene_id "ENSG00000185658"; transcript_id "hsCircRNA-323"; exon_number "2" gene_name "BRWD1"; gene_biotype "protein_coding"; oId "lv:circBRWD1-1761-001|ce:circBRWD1-7895-001|ts:circBRWD1-7744-003"; tissue "lv|ce|ts";
2	ncSplice	gene	147896301	147899898	.	+	.	gene_id "ENSG00000121989"; gene_name "ACVR2A"; gene_source "ncSplice"; gene_biotype "protein_coding";
2	ncSplice	transcript	147896301	147899898	.	+	.	gene_id "ENSG00000121989"; transcript_id "hsCircRNA-324"; gene_name "ACVR2A"; gene_biotype "protein_coding"; transcript_biotype "circRNA"; oId "lv:circACVR2A-1776-002|ce:circACVR2A-7955-002|ts:circACVR2A-7812-003"; tissue "lv|ce|ts";
2	ncSplice	exon	147896301	147896508	.	+	.	gene_id "ENSG00000121989"; transcript_id "hsCircRNA-324"; exon_number "1" gene_name "ACVR2A"; gene_biotype "protein_coding"; oId "lv:circACVR2A-1776-002|ce:circACVR2A-7955-002|ts:circACVR2A-7812-003"; tissue "lv|ce|ts";
2	ncSplice	exon	147899458	147899567	.	+	.	gene_id "ENSG00000121989"; transcript_id "hsCircRNA-324"; exon_number "2" gene_name "ACVR2A"; gene_biotype "protein_coding"; oId "lv:circACVR2A-1776-002|ce:circACVR2A-7955-002|ts:circACVR2A-7812-003"; tissue "lv|ce|ts";
2	ncSplice	exon	147899744	147899898	.	+	.	gene_id "ENSG00000121989"; transcript_id "hsCircRNA-324"; exon_number "3" gene_name "ACVR2A"; gene_biotype "protein_coding"; oId "lv:circACVR2A-1776-002|ce:circACVR2A-7955-002|ts:circACVR2A-7812-003"; tissue "lv|ce|ts";
2	ncSplice	gene	147972739	147982081	.	-	.	gene_id "ENSG00000115947"; gene_name "ORC4"; gene_source "ncSplice"; gene_biotype "protein_coding";
2	ncSplice	transcript	147972739	147982081	.	-	.	gene_id "ENSG00000115947"; transcript_id "hsCircRNA-325"; gene_name "ORC4"; gene_biotype "protein_coding"; transcript_biotype "circRNA"; oId "lv:circORC4-1778-001|ce:circORC4-7960-002|ts:circORC4-7814-001"; tissue "lv|ce|ts";
2	ncSplice	exon	147972739	147972829	.	-	.	gene_id "ENSG00000115947"; transcript_id "hsCircRNA-325"; exon_number "1" gene_name "ORC4"; gene_biotype "protein_coding"; oId "lv:circORC4-1778-001|ce:circORC4-7960-002|ts:circORC4-7814-001"; tissue "lv|ce|ts";
2	ncSplice	exon	147973448	147973524	.	-	.	gene_id "ENSG00000115947"; transcript_id "hsCircRNA-325"; exon_number "2" gene_name "ORC4"; gene_biotype "protein_coding"; oId "lv:circORC4-1778-001|ce:circORC4-7960-002|ts:circORC4-7814-001"; tissue "lv|ce|ts";
2	ncSplice	exon	147975902	147975975	.	-	.	gene_id "ENSG00000115947"; transcript_id "hsCircRNA-325"; exon_number "3" gene_name "ORC4"; gene_biotype "protein_coding"; oId "lv:circORC4-1778-001|ce:circORC4-7960-002|ts:circORC4-7814-001"; tissue "lv|ce|ts";
2	ncSplice	exon	147981928	147982081	.	-	.	gene_id "ENSG00000115947"; transcript_id "hsCircRNA-325"; exon_number "4" gene_name "ORC4"; gene_biotype "protein_coding"; oId "lv:circORC4-1778-001|ce:circORC4-7960-002|ts:circORC4-7814-001"; tissue "lv|ce|ts";
2	ncSplice	gene	161179614	161204793	.	+	.	gene_id "ENSG00000136560"; gene_name "TANK"; gene_source "ncSplice"; gene_biotype "protein_coding";
2	ncSplice	transcript	161179614	161204793	.	+	.	gene_id "ENSG00000136560"; transcript_id "hsCircRNA-326"; gene_name "TANK"; gene_biotype "protein_coding"; transcript_biotype "circRNA"; oId "lv:circTANK-1787-003|ce:circTANK-8041-005|ts:circTANK-7879-022"; tissue "lv|ce|ts";
2	ncSplice	exon	161179614	161179761	.	+	.	gene_id "ENSG00000136560"; transcript_id "hsCircRNA-326"; exon_number "1" gene_name "TANK"; gene_biotype "protein_coding"; oId "lv:circTANK-1787-003|ce:circTANK-8041-005|ts:circTANK-7879-022"; tissue "lv|ce|ts";
2	ncSplice	exon	161203487	161203595	.	+	.	gene_id "ENSG00000136560"; transcript_id "hsCircRNA-326"; exon_number "2" gene_name "TANK"; gene_biotype "protein_coding"; oId "lv:circTANK-1787-003|ce:circTANK-8041-005|ts:circTANK-7879-022"; tissue "lv|ce|ts";
2	ncSplice	exon	161204675	161204793	.	+	.	gene_id "ENSG00000136560"; transcript_id "hsCircRNA-326"; exon_number "3" gene_name "TANK"; gene_biotype "protein_coding"; oId "lv:circTANK-1787-003|ce:circTANK-8041-005|ts:circTANK-7879-022"; tissue "lv|ce|ts";
2	ncSplice	gene	171028339	171046362	.	-	.	gene_id "ENSG00000198586"; gene_name "TLK1"; gene_source "ncSplice"; gene_biotype "protein_coding";
2	ncSplice	transcript	171028339	171046362	.	-	.	gene_id "ENSG00000198586"; transcript_id "hsCircRNA-327"; gene_name "TLK1"; gene_biotype "protein_coding"; transcript_biotype "circRNA"; oId "lv:circTLK1-1795-001|ce:circTLK1-8117-001|ts:circTLK1-7929-001"; tissue "lv|ce|ts";
2	ncSplice	exon	171028339	171028405	.	-	.	gene_id "ENSG00000198586"; transcript_id "hsCircRNA-327"; exon_number "1" gene_name "TLK1"; gene_biotype "protein_coding"; oId "lv:circTLK1-1795-001|ce:circTLK1-8117-001|ts:circTLK1-7929-001"; tissue "lv|ce|ts";
2	ncSplice	exon	171046174	171046362	.	-	.	gene_id "ENSG00000198586"; transcript_id "hsCircRNA-327"; exon_number "2" gene_name "TLK1"; gene_biotype "protein_coding"; oId "lv:circTLK1-1795-001|ce:circTLK1-8117-001|ts:circTLK1-7929-001"; tissue "lv|ce|ts";
2	ncSplice	gene	190659158	190673152	.	+	.	gene_id "ENSG00000138386"; gene_name "NAB1"; gene_source "ncSplice"; gene_biotype "protein_coding";
2	ncSplice	transcript	190659158	190673152	.	+	.	gene_id "ENSG00000138386"; transcript_id "hsCircRNA-328"; gene_name "NAB1"; gene_biotype "protein_coding"; transcript_biotype "circRNA"; oId "lv:circNAB1-1806-001|ce:circNAB1-8202-001|ts:circNAB1-8039-001"; tissue "lv|ce|ts";
2	ncSplice	exon	190659158	190659995	.	+	.	gene_id "ENSG00000138386"; transcript_id "hsCircRNA-328"; exon_number "1" gene_name "NAB1"; gene_biotype "protein_coding"; oId "lv:circNAB1-1806-001|ce:circNAB1-8202-001|ts:circNAB1-8039-001"; tissue "lv|ce|ts";
2	ncSplice	exon	190670326	190670459	.	+	.	gene_id "ENSG00000138386"; transcript_id "hsCircRNA-328"; exon_number "2" gene_name "NAB1"; gene_biotype "protein_coding"; oId "lv:circNAB1-1806-001|ce:circNAB1-8202-001|ts:circNAB1-8039-001"; tissue "lv|ce|ts";
2	ncSplice	exon	190673101	190673152	.	+	.	gene_id "ENSG00000138386"; transcript_id "hsCircRNA-328"; exon_number "3" gene_name "NAB1"; gene_biotype "protein_coding"; oId "lv:circNAB1-1806-001|ce:circNAB1-8202-001|ts:circNAB1-8039-001"; tissue "lv|ce|ts";
2	ncSplice	gene	200597397	200599746	.	+	.	gene_id "ENSG00000138356"; gene_name "AOX1"; gene_source "ncSplice"; gene_biotype "protein_coding";
2	ncSplice	transcript	200597397	200599746	.	+	.	gene_id "ENSG00000138356"; transcript_id "hsCircRNA-329"; gene_name "AOX1"; gene_biotype "protein_coding"; transcript_biotype "circRNA"; oId "lv:circAOX1-1813-001"; tissue "lv";
2	ncSplice	exon	200597397	200597505	.	+	.	gene_id "ENSG00000138356"; transcript_id "hsCircRNA-329"; exon_number "1" gene_name "AOX1"; gene_biotype "protein_coding"; oId "lv:circAOX1-1813-001"; tissue "lv";
2	ncSplice	exon	200599620	200599746	.	+	.	gene_id "ENSG00000138356"; transcript_id "hsCircRNA-329"; exon_number "2" gene_name "AOX1"; gene_biotype "protein_coding"; oId "lv:circAOX1-1813-001"; tissue "lv";
2	ncSplice	gene	200597397	200605628	.	+	.	gene_id "ENSG00000138356"; gene_name "AOX1"; gene_source "ncSplice"; gene_biotype "protein_coding";
2	ncSplice	transcript	200597397	200605628	.	+	.	gene_id "ENSG00000138356"; transcript_id "hsCircRNA-330"; gene_name "AOX1"; gene_biotype "protein_coding"; transcript_biotype "circRNA"; oId "lv:circAOX1-1814-001"; tissue "lv";
2	ncSplice	exon	200597397	200597505	.	+	.	gene_id "ENSG00000138356"; transcript_id "hsCircRNA-330"; exon_number "1" gene_name "AOX1"; gene_biotype "protein_coding"; oId "lv:circAOX1-1814-001"; tissue "lv";
2	ncSplice	exon	200599620	200602345	.	+	.	gene_id "ENSG00000138356"; transcript_id "hsCircRNA-330"; exon_number "2" gene_name "AOX1"; gene_biotype "protein_coding"; oId "lv:circAOX1-1814-001"; tissue "lv";
2	ncSplice	exon	200603267	200603356	.	+	.	gene_id "ENSG00000138356"; transcript_id "hsCircRNA-330"; exon_number "3" gene_name "AOX1"; gene_biotype "protein_coding"; oId "lv:circAOX1-1814-001"; tissue "lv";
2	ncSplice	exon	200604017	200604097	.	+	.	gene_id "ENSG00000138356"; transcript_id "hsCircRNA-330"; exon_number "4" gene_name "AOX1"; gene_biotype "protein_coding"; oId "lv:circAOX1-1814-001"; tissue "lv";
2	ncSplice	exon	200604696	200604840	.	+	.	gene_id "ENSG00000138356"; transcript_id "hsCircRNA-330"; exon_number "5" gene_name "AOX1"; gene_biotype "protein_coding"; oId "lv:circAOX1-1814-001"; tissue "lv";
2	ncSplice	exon	200605536	200605628	.	+	.	gene_id "ENSG00000138356"; transcript_id "hsCircRNA-330"; exon_number "6" gene_name "AOX1"; gene_biotype "protein_coding"; oId "lv:circAOX1-1814-001"; tissue "lv";
2	ncSplice	gene	202464809	202467689	.	+	.	gene_id "ENSG00000204217"; gene_name "BMPR2"; gene_source "ncSplice"; gene_biotype "protein_coding";
2	ncSplice	transcript	202464809	202467689	.	+	.	gene_id "ENSG00000204217"; transcript_id "hsCircRNA-331"; gene_name "BMPR2"; gene_biotype "protein_coding"; transcript_biotype "circRNA"; oId "lv:circBMPR2-1823-001|ce:circBMPR2-8287-001|ts:circBMPR2-8115-001"; tissue "lv|ce|ts";
2	ncSplice	exon	202464809	202464979	.	+	.	gene_id "ENSG00000204217"; transcript_id "hsCircRNA-331"; exon_number "1" gene_name "BMPR2"; gene_biotype "protein_coding"; oId "lv:circBMPR2-1823-001|ce:circBMPR2-8287-001|ts:circBMPR2-8115-001"; tissue "lv|ce|ts";
2	ncSplice	exon	202467519	202467689	.	+	.	gene_id "ENSG00000204217"; transcript_id "hsCircRNA-331"; exon_number "2" gene_name "BMPR2"; gene_biotype "protein_coding"; oId "lv:circBMPR2-1823-001|ce:circBMPR2-8287-001|ts:circBMPR2-8115-001"; tissue "lv|ce|ts";
2	ncSplice	gene	210098086	210154611	.	-	.	gene_id "ENSG00000144445"; gene_name "KANSL1L"; gene_source "ncSplice"; gene_biotype "protein_coding";
2	ncSplice	transcript	210098086	210154611	.	-	.	gene_id "ENSG00000144445"; transcript_id "hsCircRNA-332"; gene_name "KANSL1L"; gene_biotype "protein_coding"; transcript_biotype "circRNA"; oId "lv:circKANSL1L-1840-001"; tissue "lv";
2	ncSplice	exon	210098086	210098207	.	-	.	gene_id "ENSG00000144445"; transcript_id "hsCircRNA-332"; exon_number "1" gene_name "KANSL1L"; gene_biotype "protein_coding"; oId "lv:circKANSL1L-1840-001"; tissue "lv";
2	ncSplice	exon	210104104	210104301	.	-	.	gene_id "ENSG00000144445"; transcript_id "hsCircRNA-332"; exon_number "2" gene_name "KANSL1L"; gene_biotype "protein_coding"; oId "lv:circKANSL1L-1840-001"; tissue "lv";
2	ncSplice	exon	210129031	210129172	.	-	.	gene_id "ENSG00000144445"; transcript_id "hsCircRNA-332"; exon_number "3" gene_name "KANSL1L"; gene_biotype "protein_coding"; oId "lv:circKANSL1L-1840-001"; tissue "lv";
2	ncSplice	exon	210153495	210154611	.	-	.	gene_id "ENSG00000144445"; transcript_id "hsCircRNA-332"; exon_number "4" gene_name "KANSL1L"; gene_biotype "protein_coding"; oId "lv:circKANSL1L-1840-001"; tissue "lv";
2	ncSplice	gene	210104104	210154611	.	-	.	gene_id "ENSG00000144445"; gene_name "KANSL1L"; gene_source "ncSplice"; gene_biotype "protein_coding";
2	ncSplice	transcript	210104104	210154611	.	-	.	gene_id "ENSG00000144445"; transcript_id "hsCircRNA-333"; gene_name "KANSL1L"; gene_biotype "protein_coding"; transcript_biotype "circRNA"; oId "lv:circKANSL1L-1841-001"; tissue "lv";
2	ncSplice	exon	210104104	210104301	.	-	.	gene_id "ENSG00000144445"; transcript_id "hsCircRNA-333"; exon_number "1" gene_name "KANSL1L"; gene_biotype "protein_coding"; oId "lv:circKANSL1L-1841-001"; tissue "lv";
2	ncSplice	exon	210129031	210129172	.	-	.	gene_id "ENSG00000144445"; transcript_id "hsCircRNA-333"; exon_number "2" gene_name "KANSL1L"; gene_biotype "protein_coding"; oId "lv:circKANSL1L-1841-001"; tissue "lv";
2	ncSplice	exon	210153495	210154611	.	-	.	gene_id "ENSG00000144445"; transcript_id "hsCircRNA-333"; exon_number "3" gene_name "KANSL1L"; gene_biotype "protein_coding"; oId "lv:circKANSL1L-1841-001"; tissue "lv";
2	ncSplice	gene	216141186	216148276	.	+	.	gene_id "ENSG00000079246"; gene_name "XRCC5"; gene_source "ncSplice"; gene_biotype "protein_coding";
2	ncSplice	transcript	216141186	216148276	.	+	.	gene_id "ENSG00000079246"; transcript_id "hsCircRNA-334"; gene_name "XRCC5"; gene_biotype "protein_coding"; transcript_biotype "circRNA"; oId "lv:circXRCC5-1858-001"; tissue "lv";
2	ncSplice	exon	216141186	216141319	.	+	.	gene_id "ENSG00000079246"; transcript_id "hsCircRNA-334"; exon_number "1" gene_name "XRCC5"; gene_biotype "protein_coding"; oId "lv:circXRCC5-1858-001"; tissue "lv";
2	ncSplice	exon	216148083	216148276	.	+	.	gene_id "ENSG00000079246"; transcript_id "hsCircRNA-334"; exon_number "2" gene_name "XRCC5"; gene_biotype "protein_coding"; oId "lv:circXRCC5-1858-001"; tissue "lv";
2	ncSplice	gene	216141186	216162048	.	+	.	gene_id "ENSG00000079246"; gene_name "XRCC5"; gene_source "ncSplice"; gene_biotype "protein_coding";
2	ncSplice	transcript	216141186	216162048	.	+	.	gene_id "ENSG00000079246"; transcript_id "hsCircRNA-335"; gene_name "XRCC5"; gene_biotype "protein_coding"; transcript_biotype "circRNA"; oId "lv:circXRCC5-1859-001"; tissue "lv";
2	ncSplice	exon	216141186	216141319	.	+	.	gene_id "ENSG00000079246"; transcript_id "hsCircRNA-335"; exon_number "1" gene_name "XRCC5"; gene_biotype "protein_coding"; oId "lv:circXRCC5-1859-001"; tissue "lv";
2	ncSplice	exon	216148083	216148276	.	+	.	gene_id "ENSG00000079246"; transcript_id "hsCircRNA-335"; exon_number "2" gene_name "XRCC5"; gene_biotype "protein_coding"; oId "lv:circXRCC5-1859-001"; tissue "lv";
2	ncSplice	exon	216160068	216162048	.	+	.	gene_id "ENSG00000079246"; transcript_id "hsCircRNA-335"; exon_number "3" gene_name "XRCC5"; gene_biotype "protein_coding"; oId "lv:circXRCC5-1859-001"; tissue "lv";
22	ncSplice	gene	24302195	24313466	.	+	.	gene_id "ENSG00000100014"; gene_name "SPECC1L"; gene_source "ncSplice"; gene_biotype "protein_coding";
22	ncSplice	transcript	24302195	24313466	.	+	.	gene_id "ENSG00000100014"; transcript_id "hsCircRNA-336"; gene_name "SPECC1L"; gene_biotype "protein_coding"; transcript_biotype "circRNA"; oId "lv:circSPECC1L-1867-001"; tissue "lv";
22	ncSplice	exon	24302195	24302384	.	+	.	gene_id "ENSG00000100014"; transcript_id "hsCircRNA-336"; exon_number "1" gene_name "SPECC1L"; gene_biotype "protein_coding"; oId "lv:circSPECC1L-1867-001"; tissue "lv";
22	ncSplice	exon	24313313	24313466	.	+	.	gene_id "ENSG00000100014"; transcript_id "hsCircRNA-336"; exon_number "2" gene_name "SPECC1L"; gene_biotype "protein_coding"; oId "lv:circSPECC1L-1867-001"; tissue "lv";
2	ncSplice	gene	226864604	226914351	.	+	.	gene_id "ENSG00000144468"; gene_name "RHBDD1"; gene_source "ncSplice"; gene_biotype "protein_coding";
2	ncSplice	transcript	226864604	226914351	.	+	.	gene_id "ENSG00000144468"; transcript_id "hsCircRNA-337"; gene_name "RHBDD1"; gene_biotype "protein_coding"; transcript_biotype "circRNA"; oId "lv:circRHBDD1-1878-001|ce:circRHBDD1-8496-005|ts:circRHBDD1-8334-050"; tissue "lv|ce|ts";
2	ncSplice	exon	226864604	226865126	.	+	.	gene_id "ENSG00000144468"; transcript_id "hsCircRNA-337"; exon_number "1" gene_name "RHBDD1"; gene_biotype "protein_coding"; oId "lv:circRHBDD1-1878-001|ce:circRHBDD1-8496-005|ts:circRHBDD1-8334-050"; tissue "lv|ce|ts";
2	ncSplice	exon	226867186	226867318	.	+	.	gene_id "ENSG00000144468"; transcript_id "hsCircRNA-337"; exon_number "2" gene_name "RHBDD1"; gene_biotype "protein_coding"; oId "lv:circRHBDD1-1878-001|ce:circRHBDD1-8496-005|ts:circRHBDD1-8334-050"; tissue "lv|ce|ts";
2	ncSplice	exon	226906793	226906881	.	+	.	gene_id "ENSG00000144468"; transcript_id "hsCircRNA-337"; exon_number "3" gene_name "RHBDD1"; gene_biotype "protein_coding"; oId "lv:circRHBDD1-1878-001|ce:circRHBDD1-8496-005|ts:circRHBDD1-8334-050"; tissue "lv|ce|ts";
2	ncSplice	exon	226908822	226908878	.	+	.	gene_id "ENSG00000144468"; transcript_id "hsCircRNA-337"; exon_number "4" gene_name "RHBDD1"; gene_biotype "protein_coding"; oId "lv:circRHBDD1-1878-001|ce:circRHBDD1-8496-005|ts:circRHBDD1-8334-050"; tissue "lv|ce|ts";
2	ncSplice	exon	226914208	226914351	.	+	.	gene_id "ENSG00000144468"; transcript_id "hsCircRNA-337"; exon_number "5" gene_name "RHBDD1"; gene_biotype "protein_coding"; oId "lv:circRHBDD1-1878-001|ce:circRHBDD1-8496-005|ts:circRHBDD1-8334-050"; tissue "lv|ce|ts";
22	ncSplice	gene	27910964	27914347	.	-	.	gene_id "ENSG00000180957"; gene_name "PITPNB"; gene_source "ncSplice"; gene_biotype "protein_coding";
22	ncSplice	transcript	27910964	27914347	.	-	.	gene_id "ENSG00000180957"; transcript_id "hsCircRNA-338"; gene_name "PITPNB"; gene_biotype "protein_coding"; transcript_biotype "circRNA"; oId "lv:circPITPNB-1880-001|ts:circPITPNB-8352-001"; tissue "lv|ts";
22	ncSplice	exon	27910964	27911109	.	-	.	gene_id "ENSG00000180957"; transcript_id "hsCircRNA-338"; exon_number "1" gene_name "PITPNB"; gene_biotype "protein_coding"; oId "lv:circPITPNB-1880-001|ts:circPITPNB-8352-001"; tissue "lv|ts";
22	ncSplice	exon	27914317	27914347	.	-	.	gene_id "ENSG00000180957"; transcript_id "hsCircRNA-338"; exon_number "2" gene_name "PITPNB"; gene_biotype "protein_coding"; oId "lv:circPITPNB-1880-001|ts:circPITPNB-8352-001"; tissue "lv|ts";
22	ncSplice	gene	31758546	31765060	.	+	.	gene_id "ENSG00000100150"; gene_name "DEPDC5"; gene_source "ncSplice"; gene_biotype "protein_coding";
22	ncSplice	transcript	31758546	31765060	.	+	.	gene_id "ENSG00000100150"; transcript_id "hsCircRNA-339"; gene_name "DEPDC5"; gene_biotype "protein_coding"; transcript_biotype "circRNA"; oId "lv:circDEPDC5-1894-001"; tissue "lv";
22	ncSplice	exon	31758546	31758633	.	+	.	gene_id "ENSG00000100150"; transcript_id "hsCircRNA-339"; exon_number "1" gene_name "DEPDC5"; gene_biotype "protein_coding"; oId "lv:circDEPDC5-1894-001"; tissue "lv";
22	ncSplice	exon	31760656	31760702	.	+	.	gene_id "ENSG00000100150"; transcript_id "hsCircRNA-339"; exon_number "2" gene_name "DEPDC5"; gene_biotype "protein_coding"; oId "lv:circDEPDC5-1894-001"; tissue "lv";
22	ncSplice	exon	31764975	31765060	.	+	.	gene_id "ENSG00000100150"; transcript_id "hsCircRNA-339"; exon_number "3" gene_name "DEPDC5"; gene_biotype "protein_coding"; oId "lv:circDEPDC5-1894-001"; tissue "lv";
[truncated: 24,777 more rows]
